# Supplementary material for: Identification of Potent, Selective, and Orally Bioavailable Small-Molecule GSPT1/2 Degraders from a Focused Library of Cereblon Modulators
Source: PubMed Central journal article supplement — J Med Chem. 2021 May 27;64(11):7296–311. doi: 10.1021/acs.jmedchem.0c01313 (PMC8201443; doi:10.1021/acs.jmedchem.0c01313), 2021-05-27
Supplement: jm0c01313_si_001.pdf [file jm0c01313_si_001.pdf]

## SUPPORTING INFORMATION

### **Identification of potent, selective and orally bioavailable small molecule GSPT1/2 degraders from a focused library of Cereblon modulators**

Gisele Nishiguchi,<sup>§1</sup> Fatemeh Keramatnia,<sup>§1,2</sup> Jaeki Min,<sup>§1</sup> Yunchao Chang,<sup>3</sup> Barbara

Jonchere,<sup>4</sup> Sourav Das,<sup>1</sup> Marisa Actis,<sup>1</sup> Jeanine Price,<sup>1</sup> Divyabharathi Chepyala,<sup>1</sup>

Brandon Young,<sup>1</sup> Kevin McGowan,<sup>1</sup> P. Jake Slavish,<sup>1</sup> Anand Mayasundari,<sup>1</sup> Jamie A.

Jarusiewicz,<sup>1</sup> Lei Yang,<sup>1</sup> Yong Li,<sup>1</sup> Xiang Fu,<sup>1</sup> Shalandus H. Garrett,<sup>1</sup> James B. Papizan,<sup>5</sup>

Kiran Kodali, Junmin Peng,<sup>6,7,8</sup> Shondra M. Pruett-Miller,<sup>5</sup> Martine F. Roussel,<sup>4</sup> Charles

Mullighan,<sup>3</sup> Marcus Fischer,<sup>1,2,8</sup> Zoran Rankovic\*<sup>1</sup>

<sup>1</sup>*Department of Chemical Biology and Therapeutics, St. Jude Children's Research Hospital, Memphis, TN 38105, United States*

<sup>2</sup>*Department of Pharmaceutical Sciences, University of Tennessee Health Science Center, Memphis, TN 38163, United States*

<sup>3</sup>*Department of Pathology, St. Jude Children's Research Hospital, Memphis, TN 38105, United States*

<sup>4</sup>*Department of Tumor Cell Biology, St. Jude Children's Research Hospital, Memphis, TN 38105, United States*

<sup>5</sup>*Center for Advanced Genome Engineering, St. Jude Children's Research Hospital, Memphis, TN 38105, United States*

<sup>6</sup>*Center for Proteomics and Metabolomics, St. Jude Children's Research Hospital, Memphis, TN 38105, United States*

<sup>7</sup>*Department of Developmental Neurobiology, St. Jude Children's Research Hospital, Memphis, TN 38105, United States*

<sup>8</sup>Department of Structural Biology, St. Jude Children's Research Hospital, Memphis, TN 38105, United States

\*Corresponding author; e-mail: zoran.rankovic@stjude.org

<sup>§</sup>Contributed equally to this work

## Table of Contents

|                                                                                             |     |
|---------------------------------------------------------------------------------------------|-----|
| Synthesis of compounds <b>6-15</b> (Scheme S1) .....                                        | S3  |
| Library physicochemical properties histograms (MW, AlogP, PSA, HBD, HBA) .....              | S3  |
| CRBN fluorescence polarization assay data for 238 compounds .....                           | S3  |
| Immunoblot for wild-type and Cereblon deficient MV4-11 cell lines.....                      | S4  |
| Caspase activation for compounds <b>6</b> and <b>7</b> .....                                | S4  |
| Relative expression of CRBN and GSPT1 in MV4-11 and MHH-CALL-4 cells.....                   | S4  |
| Immunoblot for GSPT1 in MB004 cells with compounds <b>6</b> and <b>7</b> .....              | S5  |
| Immunoblot for GSPT1 in MV4-11 cells with cell-inactive compound <b>10</b> .....            | S5  |
| Molecular Modeling .....                                                                    | S6  |
| Immunoblot for GSPT1 and IKZF1 proteins with compound <b>5</b> (CC-90009) .....             | S8  |
| GSPT1 expression in pediatric cancer patients from St. Jude's Cloud PeCAN Data Portal ..... | S9  |
| Cytotoxicity of compounds <b>4 – 7</b> in MV4-11, MHHCALL4, PBMC and BJ cells .....         | S9  |
| Analytical spectrums for compound <b>6</b> (H-NMR, C-NMR, UPLC/MS ) .....                   | S10 |
| Analytical spectrums for compound <b>7</b> (H-NMR, C-NMR, UPLC/MS ) .....                   | S12 |
| Methods and Materials .....                                                                 | S14 |
| References .....                                                                            | S21 |
| Coordinates of the in silico model of GSPT1-6-IKZF1 model .....                             | S23 |

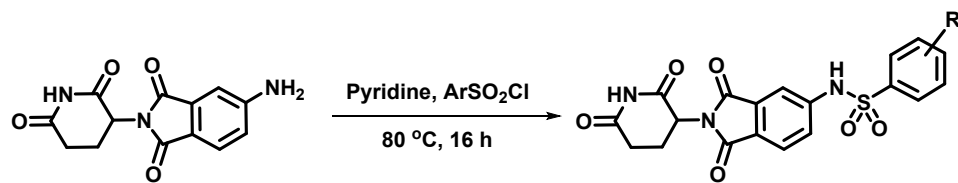

**Scheme S1.** Synthesis of compounds **6-15**.

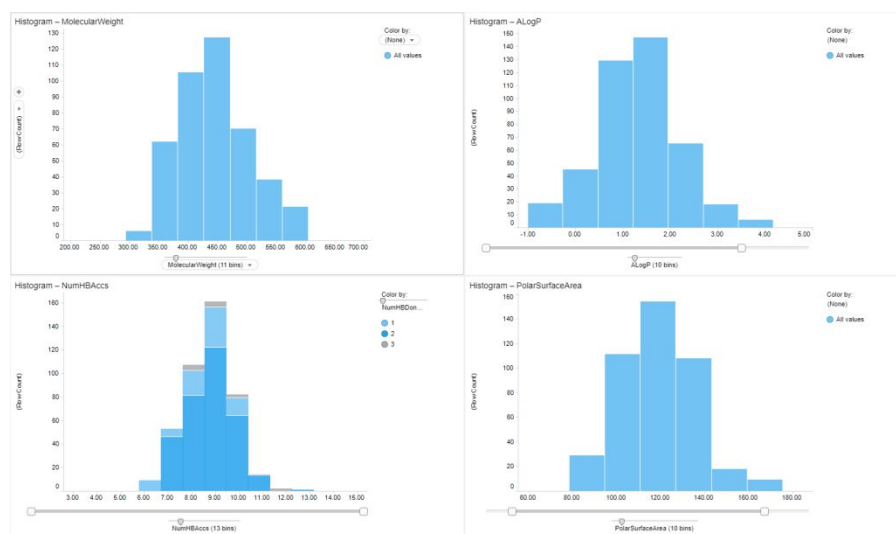

**Figure S1.** Histograms of Physicochemical Properties for 415 compounds (AlogP, MW, PSA, HBD and HBA).

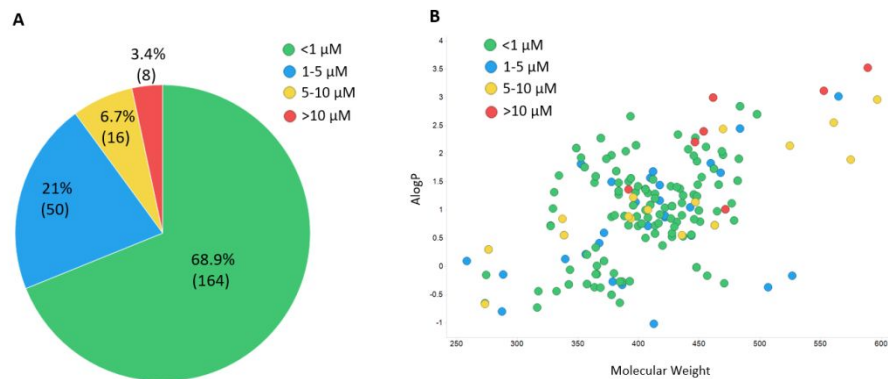

**Figure S2.** (A) Distribution of CRBN Fluorescence Polarization affinity for 238 compounds. (B) AlogP, MW colored by binned CRBN FP affinity.

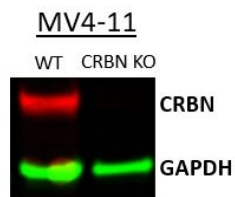

**Figure S3.** Immunoblot of wild-type and Cereblon-deficient MV4-11 cell lines (clone 4B12).

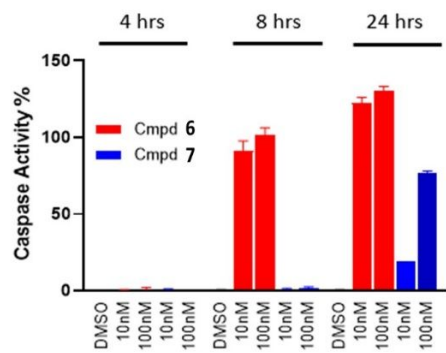

**Figure S4.** Caspase activation at 4, 8 and 24 hours for compounds 6 and 7 at 10 and 100 nM.

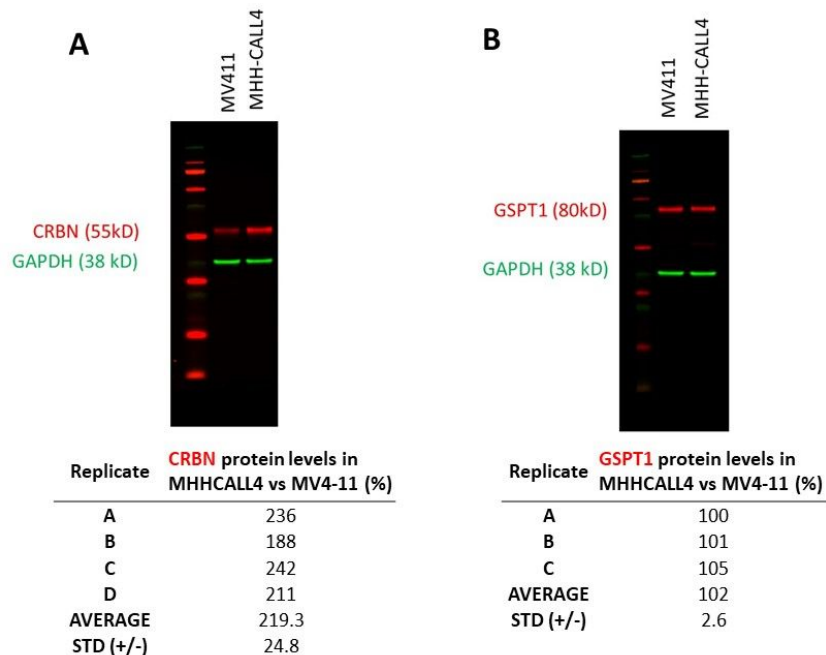

**Figure S5.** Relative expression of CRBN and GSPT1 in MV4-11 and MHH-CALL-4 cells (normalized against GAPDH).

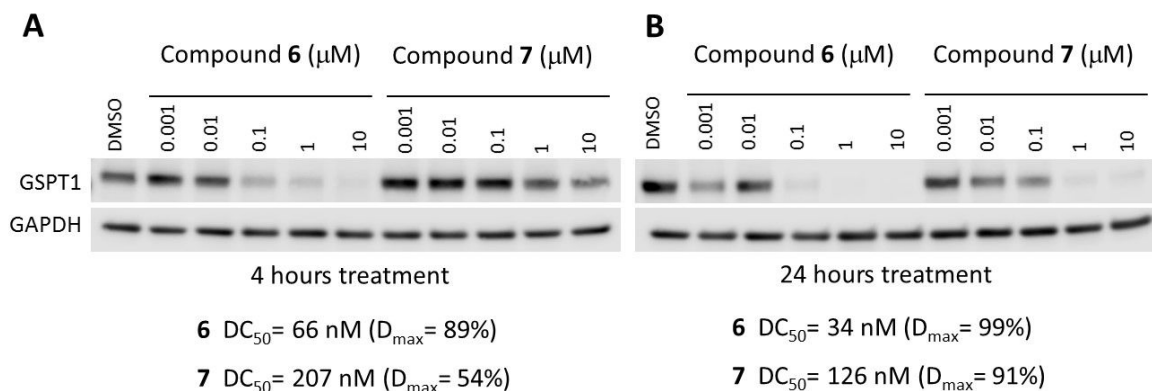

**Figure S6.** Immunoblot for GSPT1 protein after the treatment of MB004 cells with increasing concentrations of compounds **6** and **7** over: (A) 4 hours, and (B) 24 hours. Degradation values were calculated using quantified band intensities from immunoblots and  $DC_{50}$  values calculated based on the average of three independent experiments.

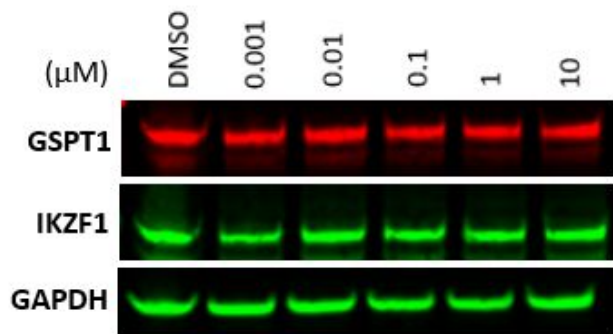

**Figure S7.** Western blot for cell inactive compound **10** (GSPT1, IKZF1, GAPDH) in MV4-11 cell line at 4h.

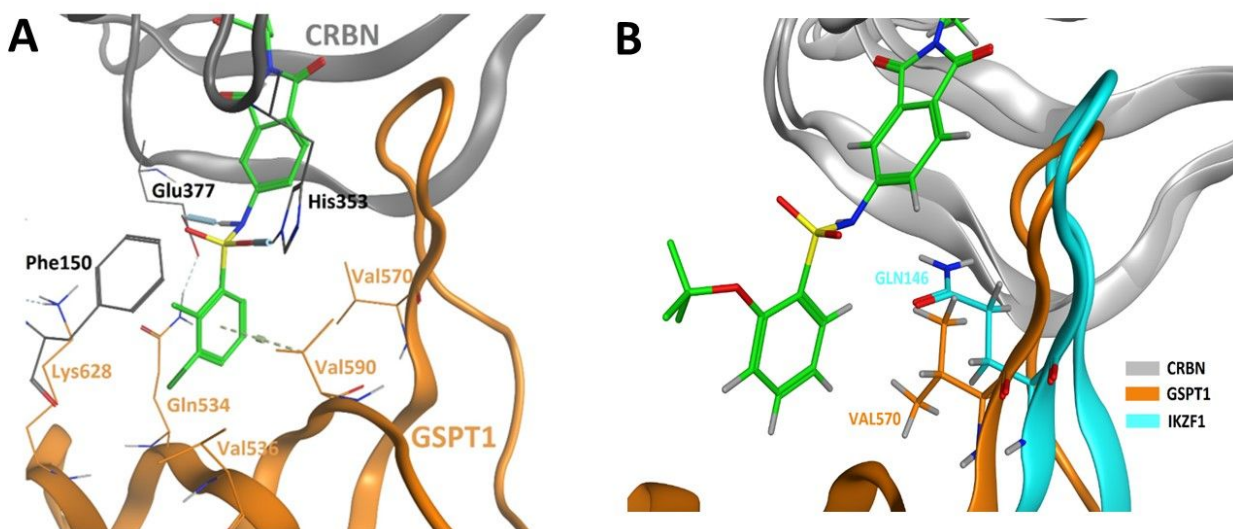

**Figure S8.** Molecular modeling of lead compounds: (A) MDS generated structure of **7** bound to a narrow hydrophobic pocket formed by CRBN Phe150 and GSPT1 residues Val570, Val590, Val536, Gln534 and Lys628; (B) IKZF1-CRBN complex is superimposed on the compound **6**-IKZF1-CRBN ternary complex obtained by docking compound **6** to the IKZF1-CRBN complex. Gln146 of IKZF1

is positioned in the place of Val570 of GSPT1 at a distance of 2.3 Å from the aryl ring of compound **6**, which may account for its selectivity over the IKZF1 degradation.

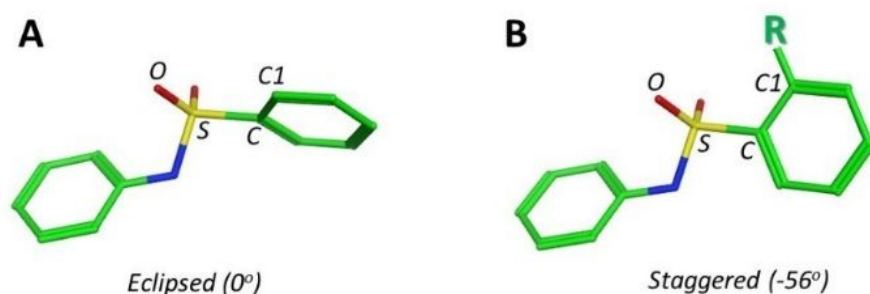

| Compound | Dihedral Angle OS-CC1 (degrees) | Potential Energy (Kcal/mol) | Delta Potential Energy (Kcal/mol) |
|----------|---------------------------------|-----------------------------|-----------------------------------|
| <b>6</b> | -56°                            | -1.1                        | -2.1                              |
| <b>6</b> | 0°                              | 1.0                         |                                   |
| <b>7</b> | -56°                            | -6.1                        | -6.1                              |
| <b>7</b> | 0°                              | 0                           |                                   |
| <b>8</b> | -56°                            | -8.1                        | +3.1                              |
| <b>8</b> | 0°                              | -11.2                       |                                   |

**Figure S9.** Force field (MMFF94X<sup>1</sup> implemented in MOE<sup>2</sup>) calculated potential energy values of compounds **6**, **7** and unsubstituted analogue **8** for their: (A) eclipsed; and (B) staggered conformations. Dihedral angle (O=S-phenyl ring plane) of -56 degrees was based on the stable poses obtained following MD simulations.

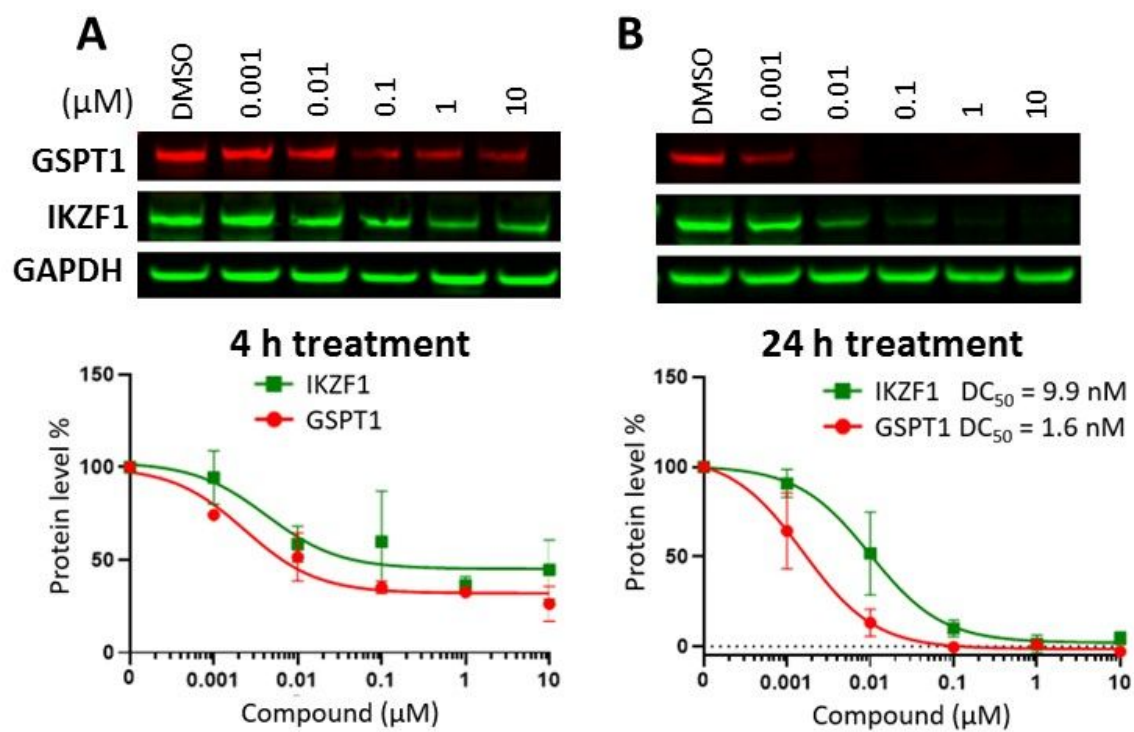

**Figure S10.** Immunoblot for GSPT1 and IKZF1 proteins after the treatment of MV4-11 cells with increasing concentrations of compound **5** (CC-90009; MedChemExpress, HY-130800, Lot 64001) over: (A) 4 hours, and (B) 24 hours.



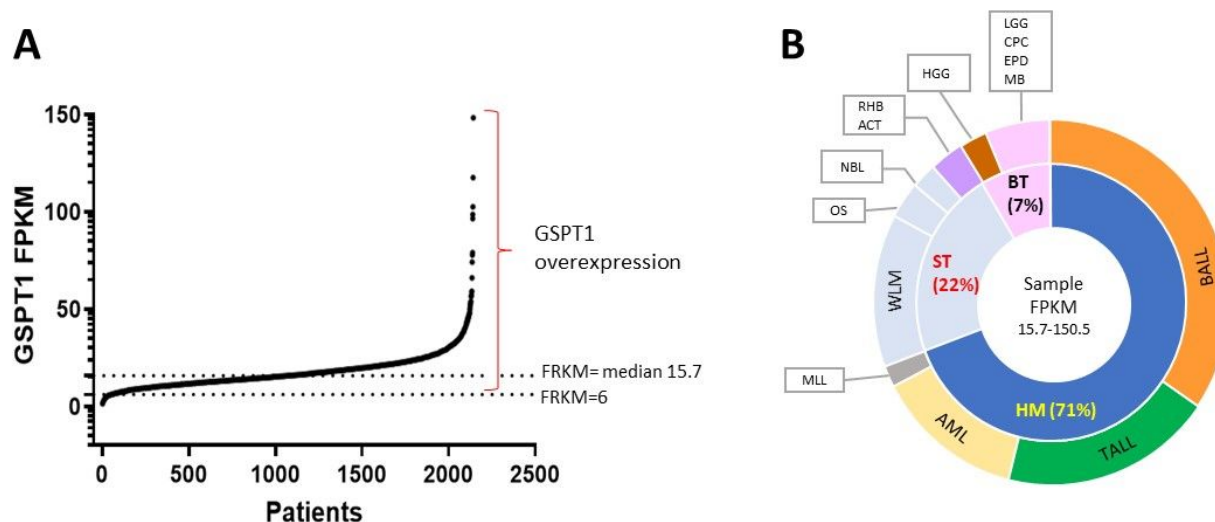

**Figure S11.** GSPT1 expression in pediatric cancer patients collected from St. Jude’s Cloud PeCAN Data Portal<sup>3</sup>. (A) GSPT1 RNA-seq gene expression from pediatric cancer patients. GSPT1 overexpression determined by FRKM > 6. Median FRKM = 15.7; (B) Pie chart representing cancer type distribution of GSPT1 overexpressed pediatric cancers above median FRKM=15.7. Cancer type abbreviation: BALL: B-Cell Acute Lymphoblastic Leukemia, TALL: T-cell Acute Lymphoblastic Leukemia, AML: Acute Myelocytic Leukemia, WLM: Wilms’ Tumor, OS: Osteosarcoma, NBL: Neuroblastoma, RHB: Rhabdosarcoma, ACT: Adrenocortical Carcinoma, HGG: High Grade Glioma, LGG: Low Grade Glioma, CPC: Choroid plexus carcinoma, EPD: Ependymoma, MB: Medulloblastoma

**Table S1.** Cytotoxicity of compounds 4 – 7 in MV4-11 and MHHCALL4 compared to PBMC and BJ cells, to establish *in vitro* therapeutic index.

| Cmpd     | MV4-11                   |             | MHH-CALL-4               |             | PBMC                     |             | BJ                       |             |
|----------|--------------------------|-------------|--------------------------|-------------|--------------------------|-------------|--------------------------|-------------|
|          | EC <sub>50</sub><br>(nM) | ±SD<br>(nM) | EC <sub>50</sub><br>(nM) | ±SD<br>(nM) | EC <sub>50</sub><br>(nM) | ±SD<br>(nM) | EC <sub>50</sub><br>(nM) | ±SD<br>(nM) |
| CC-885   | 0.0260                   | 0.0050      | 0.0019                   | 0.0009      | 0.0156                   | 0.0070      | 0.15                     | 0.01        |
| CC-90009 | 62.0000                  | 6.3540      | 4.1292                   | 0.7079      | 27.2583                  | 6.6348      | 4426.07                  | 1128.88     |
| SJ6986   | 1.5000                   | 0.5310      | 0.0425                   | 0.0054      | 0.9021                   | 0.3641      | 8732.08                  | 3207.36     |
| SJ7023   | 52.0000                  | 5.9380      | 4.4465                   | 0.6327      | 61.0702                  | 6.0011      | 37648.60                 | 7979.60     |

All values are the mean of 3 independent experiments.

# Analytical spectrums for compound 6 (H-NMR, C-NMR, UPLC/MS)

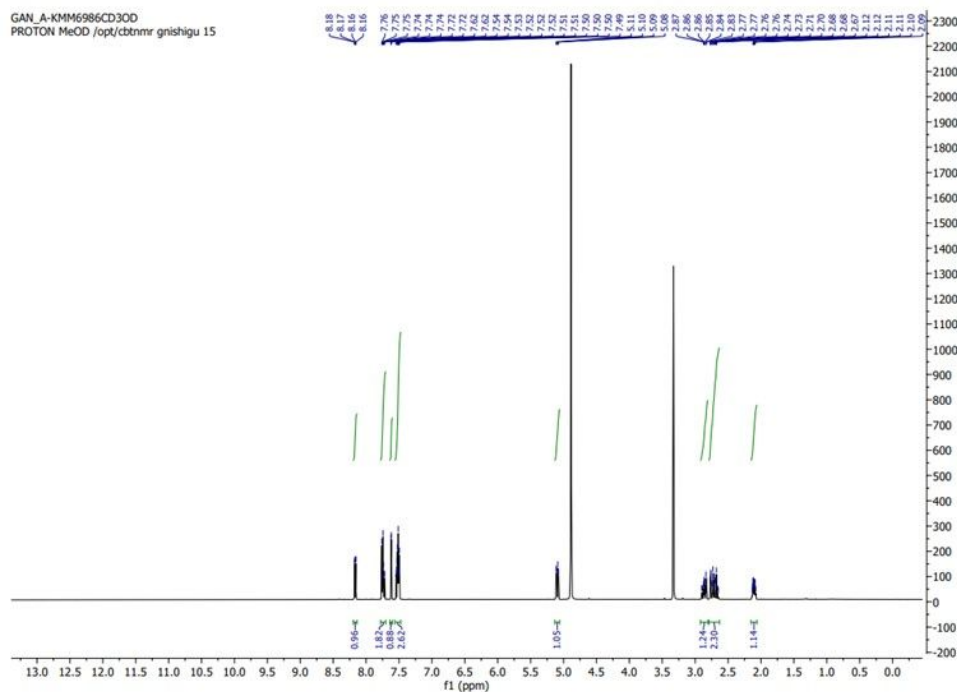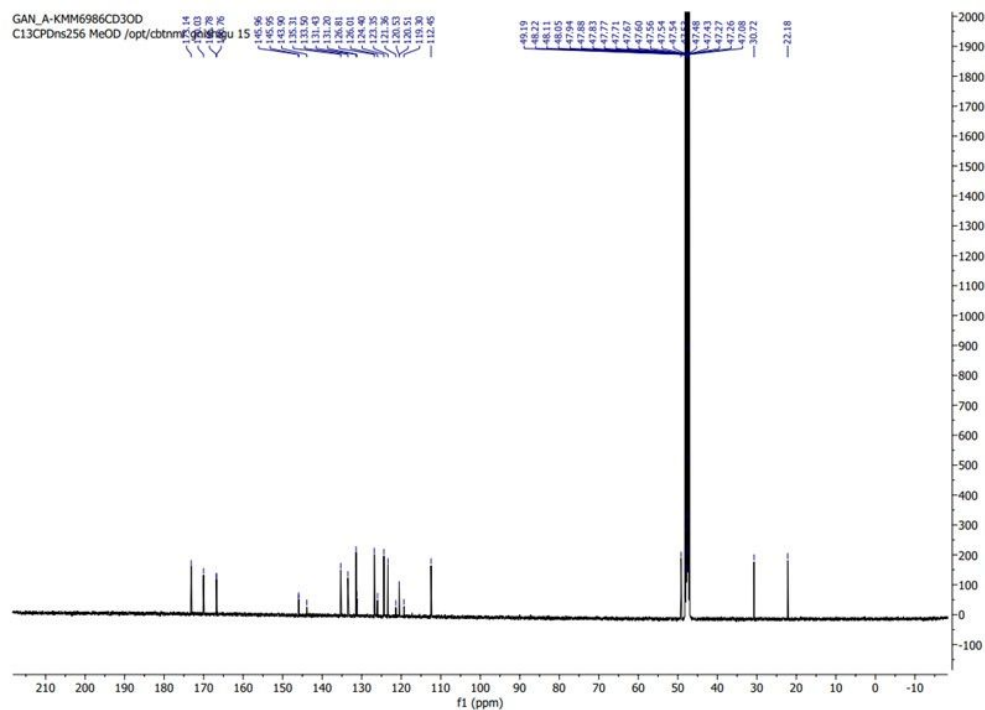

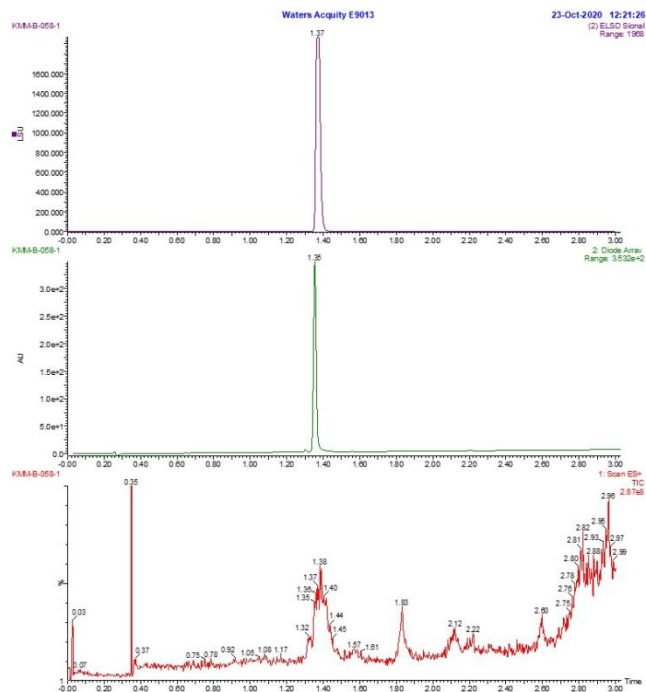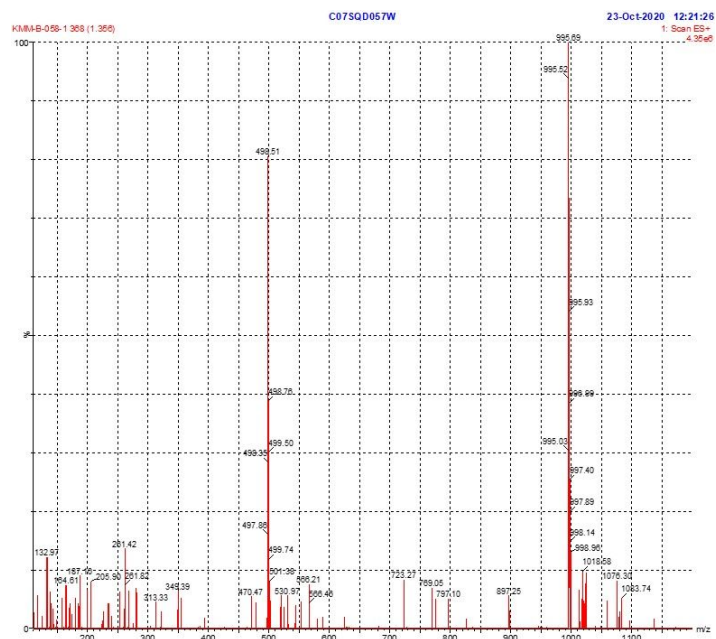

Figure S12. HNMR, CNMR and UPLC/MS for compound 6

# Analytical spectrums for compound 7 (H-NMR, C-NMR, UPLC/MS)

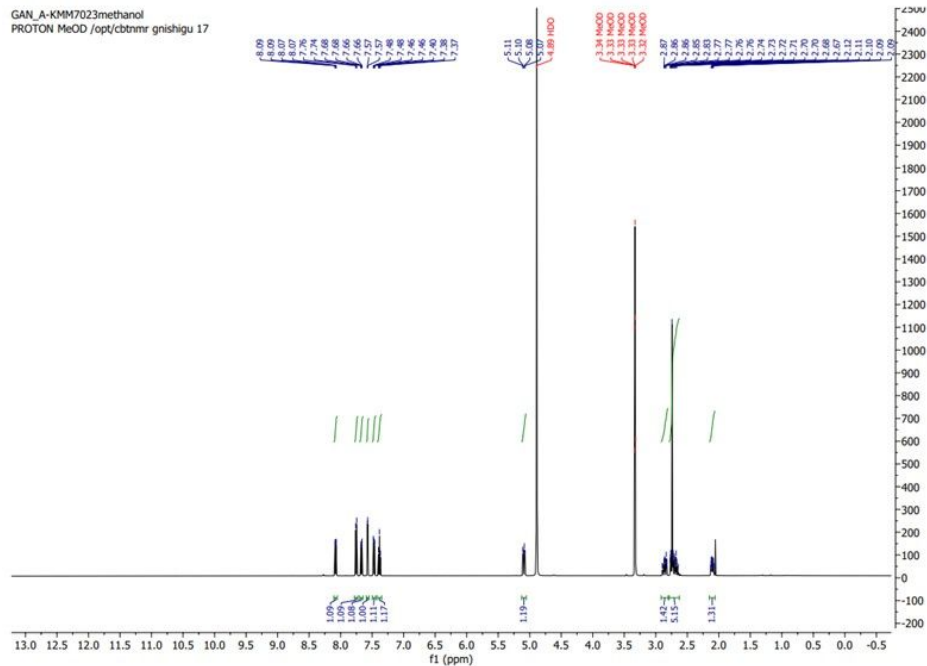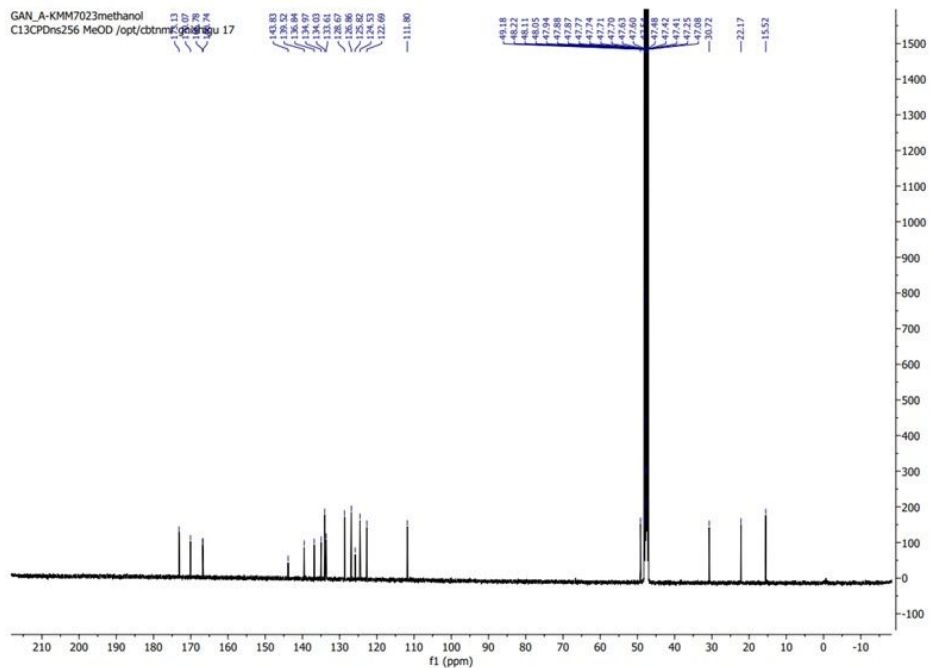

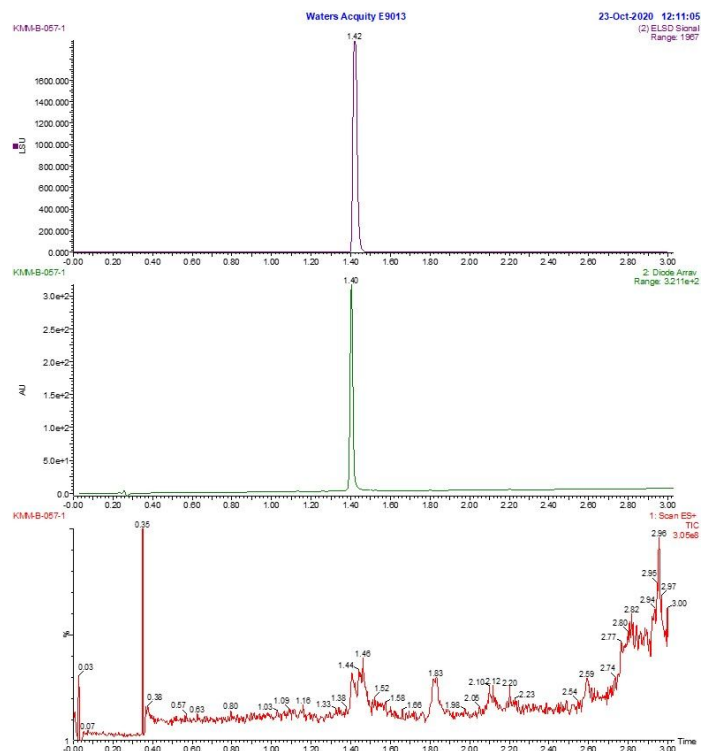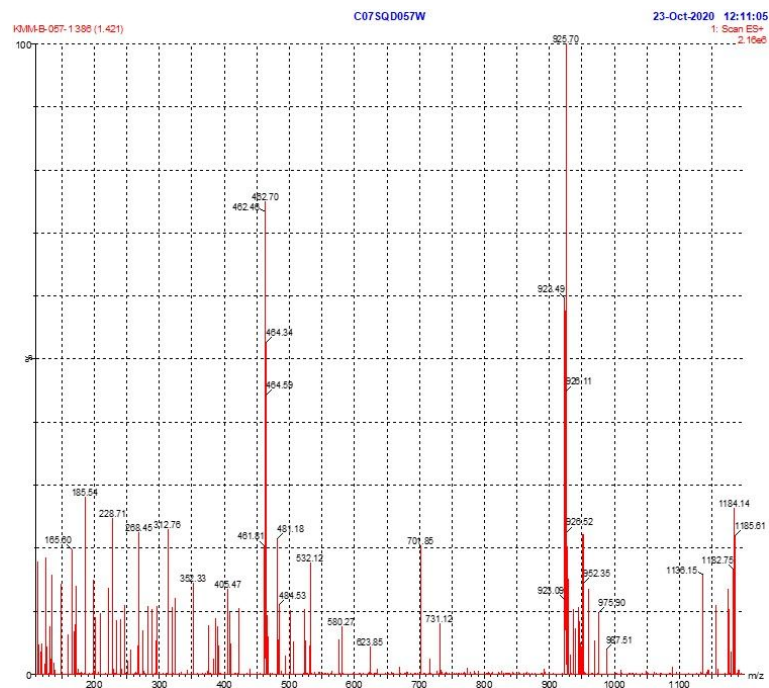

Figure S13. HNMR, CNMR and UPLC/MS for compound 7

**Cell Culture and Materials:** MV-4-11 cell line was purchased from the American Type Culture Collection (ATCC, Manassas, VA) and maintained in Iscove's Modified Dulbecco's medium (IMDM; (ATCC) supplemented with 10% FBS. HD-MB03 cell line was obtained from Drs. Milde, Witt and Deubzer.<sup>4</sup> MB002 and MB004 cells were obtained from Dr Yoon-Jae Cho.<sup>5</sup> HD-MB03 and MB004 cells were grown in neurobasal medium supplemented with glutamine, streptomycin, penicillin, B27, EGF, bFGF and heparin as previously described.<sup>6</sup> MB002 cells were cultured in 80% neurobasal medium supplemented with glutamine, streptomycin, penicillin, B27 and 20% conditioned media from previous passages; EGF, bFGF and heparin were also added to the medium. MHH-CALL4 cells were obtained from German Collection of Microorganisms and Cell Cultures GmbH (DSMZ, Germany) and were cultured in RPMI1640 medium supplemented with 10% FBS (Hyclone), Penicillin/Streptomycin (100 units/mL) and Glutamine (100  $\mu$ M). Cell identity was confirmed by STR profiling using PowerPlex® Fusion System (Promega). Normal human peripheral blood mononuclear cells (PBMC) were isolated from apheresis rings by Ficoll-Paque density gradient centrifugation. Apheresis rings were obtained from anonymous healthy blood donors at St Jude Children's Research Hospital. The donors provided Informed Consent for an IRB-approved study involving the research use of leftover diagnostic and therapeutic specimens. BJ (skin fibroblast) cells were obtained from the American Type Culture Collection ( ATCC® CRL-2522™) and maintained in DMEM supplemented with 10% FBS (Hyclone), Penicillin/Streptomycin (100 units/mL) and Glutamine (100  $\mu$ M).

**Caspase 3/7 activity assay.** MV4-11 cells were seeded in white 384-well assay plates at density of 1000 cells per well in triplicates for 3 separate timepoint experiments (4,8, 24 hrs). After overnight incubation, cells were treated with compounds in dose-response format using a Pintool

on a Biomek FXP Laboratory Automation Workstation (Beckman Coulter). After 4, 8 and 24 hrs incubation, the caspase 3/7 activity was assessed using Caspase-Glo® 3/7 Assay (Promega) according to the manufacturer's instruction. Luminescence signal was measured using an Envision plate reader (Perkin-Elmer).

**Immunoblot Analysis (MB004 cells):** Cells were seeded in 6-well plates (1 X 10<sup>6</sup> cells per well). After overnight incubation, the cells were treated with indicated concentrations for specific timepoints. The harvested cells were spined down, washed with PBS and lysed with Cell Lysis Buffer 1X (#9803, cell signaling) and the protein lysates were sonicated, spined down again to remove insoluble material and quantified. For each sample, 20 ug of protein was mixed with loading buffer and boiled for 5 min at 95 °C. Prepared samples were loaded on NuPAGE 4-12% Bis-Tris protein gels and transferred to PVDF membrane. After blocking the membrane with TBS 5% non-fat dry milk and incubation in primary antibody overnight, the corresponding protein signals were detected using horseradish peroxidase (HRP) secondary antibodies and enhanced chemiluminescence (ECL) reagents on Odyssey Imaging System. Image Studio Lite Ver 5.2 was used for blot quantification. Antibodies: rabbit anti-human eRF3/GSPT1 pAb (ab126090, abcam, 1/500 to 1/1,000), rabbit anti-human CK1 $\alpha$  pAb (#2655, cell signaling, 1/250 to 1/500), and mouse anti-GAPDH mAb (sc-47724, Santa cruz, 1/1,000) were used as primary antibodies. HRP conjugated donkey anti-rabbit IgG (NA934, GE Healthcare, 1/10,000) and sheep anti-mouse IgG (NA931, GE Healthcare 1/10,000) were used as secondary antibodies for the chemiluminescence detection.

**Plasma protein binding assay.** Stock solutions were prepared at 10 mM in DMSO. Dulbecco's phosphate buffered saline (DPBS; pH 7.4) was obtained from Invitrogen (Carlsbad, CA). Single-Use RED (rapid equilibrium dialysis) device was obtained from Thermo scientific (Rockford, IL).

Human and mouse plasma were obtained from GeneTex (Irvine, CA). Sample preparation for plasma protein binding was modified from Waters' method.<sup>7</sup> The Teflon base plate with the RED inserts was used without any pre-conditioning the membrane inserts. Plasma was thawed and centrifuged at 1000 rpm for 10 min to remove any particulates. Each compound was prepared at 10  $\mu$ M in human or mouse plasma. Spiked plasma solutions (300  $\mu$ L) were placed into the sample chamber (indicated by the red ring) and 500  $\mu$ L of DPBS into the adjacent chamber. The plate was sealed and incubated at 37°C on an orbital shaker (100 rpm) for 4 hours. After incubation, the seal was removed from the RED plate and the volume of the insert confirmed—little to no volume change occurred. Aliquots (50  $\mu$ L) were removed from each side of the insert and dispensed into a 96-well deep plate. An equal volume of blank plasma or DPBS was added to the required wells to create analytically identical sample matrices (matrix matching) followed by quenching 3 fold (v:v) cold acetonitrile containing 40 ng/ml warfarin IS. All of the plates were sealed and mixed well at 600 rpm for 10 min and were centrifuged at 4000 rpm for 20 min. The supernatants were transferred to analytical plates and diluted by Millipore water appropriately for analysis by LC-MS/MS. Conditions for SCIEX Qtrap UHPLC-MS/MS system are described separately. The test compound concentrations were quantified in both buffer and plasma chambers via peak areas relative to the internal standard. The percentage of the test compound bound to plasma was calculated on following equations: %Free= (Concentration buffer chamber/concentration plasma chamber) x 100% and %Bound=100%-%Free.

**UPLC/MS/UV System.** Chromatographic separation was performed on an Acquity UPLC BEH C18 1.7  $\mu$ m, 2.1 x 50 mm column (Waters Corporation, Milford, MA) using an Acquity ultra performance liquid chromatography system. Data were acquired using MassLynx v. 4.1 and analyzed using the QuanLynx software suite. This was coupled to an SQ mass spectrometer. The



total flow rate was 1.0 mL/min for generic method and 0.9 mL/min for medium polar method. The sample injection volume was 10  $\mu$ L. The column temperature was maintained at 55 °C. Samples were analyzed in acidic condition: solvent A was 0.1% formic acid in MilliQ H<sub>2</sub>O and solvent B was 0.1% formic acid in ACN. Samples were eluted under generic or medium polar gradients. For a generic gradient: 0-0.2 min, 10-30% of solvent B; 0.2-1.6 min, 30-95% of solvent B; 1.6-1.95 min, 95% of solvent B; 1.95-2 min, 95-10% of solvent B. For a medium polar gradient: 0-0.2 min, 10% of solvent B; 0.2-1.6 min, 10-95% of solvent B; 1.6-1.95 min, 95% of solvent B; 1.95-2 min, 95-10% of solvent B. The mass spectrometer was operated with electrospray ionization in positive ionization mode. The conditions were as follows: capillary voltage 3.4 kV, cone voltage 30 V, source temperature 130 °C, desolvation temperature 400 °C, desolvation gas 800 L/hr, cone gas 100 L/hr. A full range scan from  $m/z = 100-1000$  in 0.2 s was used to monitor compounds. A single ion recording mass spectrometry for each compound was used to determine the quantification of the samples.

**UHPLC-MS/MS System.** LC-MS chromasolv grade acetonitrile (ACN) was purchased from Fisher Scientific (Loughborough, UK). LC-MS chromasolv grade and formic acid were obtained from Sigma-Aldrich (St. Louis, MO). Milli-Q water as an ultrapure laboratory grade water was used in aqueous mobile phase. Chromatographic separation was performed on an Acquity UPLC BEH C18 1.7  $\mu$ m, 2.1 x 50 mm column (Waters Corporation, Milford, MA) using a Sciex ExionLC™ with 6500+ Qtrap system. Data were acquired using Analyst v 1.7 and analyzed using the OS software suite. The UPLC column was maintained at 55 °C. Mobile phase A was 0.1% formic acid in MilliQ H<sub>2</sub>O and solvent B was 0.1% formic acid in ACN. The flow rate was 0.9 mL/min with a gradient of 0-0.2 min, B% 1-1%; 0.2-0.5min, B% 1-50%; 0.5-1.6 min, B% 50-95%; 1.6-1.95 min, B% 95-95%; 1.95-1.96 min, B% 95-1%; and 1.96-2.2 min, B% 1-1%. The sample injection volume was 2  $\mu$ L.

The mass spectrometer was operated in positive-ion mode with electrospray ionization. The conditions were as follow: ion spray voltage 5 kV, temperature 500 °C, curtain gas with a low collision gas, gas 1 and gas 2 were 60. MRM transition of 498.0>425.0 for compound **6** was automatically optimized using DiscoveryQuant™ Software. The delustering potential, collision energy and collision cell exit potential were 80, 41 and 13 volts respectively.

**Aqueous solubility assay.** Solubility assays were carried out on a Biomek FX lab automation workstation (Beckman Coulter, Inc., Fullerton, CA) using μSOL Evolution software (pION Inc., Woburn, MA). 10 μL of 10 mM compound stock (in DMSO) was added to 190 μL 1-propanol to make a reference stock plate. 5 μL from this reference stock plate were mixed with 70 μL 1-propanol and 75 μL citrate phosphate-buffered saline (PBS; isotonic) to make the reference plate, and the UV spectrum (250-500 nm) of the reference plate was read. 6 μL of 10 mM test compound stock was added to 594 μL buffer in a 96-well storage plate and mixed. The storage plate was sealed and incubated at RT for 18 h. The suspension was then filtered through a 96-well filter plate (pION Inc., Woburn, MA). 75 μL of filtrate was mixed with 75 μL 1-propanol to make the sample plate, and the UV spectrum of the sample plate was read. Calculations were carried out with μSOL Evolution software based on the area under the curve (AUC) of the UV spectrum of the sample and reference plates. All compounds were tested in triplicate.

**MDCKII-MDR1 permeability assay:** High throughput MDCKIIMDR1 permeability was performed in the Transwell® 0.4 μm polycarbonate membrane 96-well system with modified methods.<sup>8,9</sup> MDCKIIMDR1 cells were maintained at 37 °C in a humidified incubator with an atmosphere of 5% CO<sub>2</sub>. The cells were cultured in 75 cm<sup>2</sup> flasks with Dulbecco's Modified Eagle's Medium (DMEM) containing 10% fetal bovine serum (FBS), 1% non-essential amino acids (NEAA), 100 units/ml of penicillin, and 100 μg/ml of streptomycin. The MDCKIIMDR1

cells were seeded onto inserts at a density of  $2 \times 10^4$  and  $1 \times 10^4$  cells/insert separately. The medium in the wells was exchanged each other day, and the trans epithelial electrical resistance (TEER) value was measured using an epithelial volt-ohm meter (Millipore, Billerica, Massachusetts). MDCKII-MDR1 cells were grown for 4 days to reach consistent TEER values (typically 2000 ohms greater than initial value when cells are first seeded into transwells), indicating that the cells had formed a confluent polarized monolayer. For transport experiments, each cultured monolayer on the 96-well plate was washed twice with a transport buffer (HBSS/25 mM HEPES, pH 7.4). The permeability assay was initiated by the addition of each compound solution (10  $\mu$ mol/L) into inserts (apical side, A) or receivers (basolateral side, B). The MDCKII-MDR1 cell monolayers were incubated for 1 hour at 37 °C. Fractions were collected from receivers (if apical to basal permeability) or inserts (if basal to apical permeability), and concentrations were assessed by UPLC/MS (Waters; Milford, MA). All compounds were tested in triplicates. The A $\rightarrow$ B (or B $\rightarrow$ A) apparent permeability coefficients ( $P_{app}$ ) of each compound were calculated using the equation,  $P_{app} = dQ/dt \times 1/AC_0$ , where  $dQ/dt$  equals the flux of a drug across the monolayer, A equals the total insert well surface area, and  $C_0$  is the initial concentration of substrate in the donor compartment. The efflux ratio was determined by dividing the  $P_{app}$  in the B-A direction by the  $P_{app}$  in the A-B direction. An efflux ratio  $>2$  suggested that a given substrate was actively transported across the membrane.

**Liver microsomes stability assay:**<sup>10,11</sup> NADPH regenerating agent solutions A and B and mouse liver microsomes (CD-1) were obtained from BD Gentest (Woburn, MA). Pooled human liver microsomes were purchased from XenoTech (Lenexa, KS). Ninety-six deep well plates were obtained from Midsci (St. Louis, MO). Ninety-six analytical plates were obtained from Corning Incorporated (Acton, MA). Sample preparation for microsomal stability was modified from Di's

publications. A set of incubation times of 0, 15, 30, 60, 120, and 240 min were used. DMSO stock solutions of test compounds and verapamil (system control) were prepared at 10 mM concentration. Concentrated human or mouse liver microsomes (20mg/mL protein concentration) and 0.5 M EDTA were diluted into 0.1 M potassium phosphate buffer (pH 7.4) and mixed well, followed by compounds solutions being spiked. This solution was mixed and 90  $\mu$ L was transferred to 6 time points plates (each in triplicate wells). For the time 0 h plate, 3 fold (v:v) cold acetonitrile with internal standard (40 ng/ml warfarin) was added to each well, followed by addition of NADPH regenerating agent (mixing NADPH solutions A and B in PBS, pH7.4) and no incubation. For the other five time points' plate, NADPH regenerating agent was added to each well to initiate the reaction, the plate was incubated at 37° C for the required time, followed by quenching of the reaction by adding 3-fold volume of cold acetonitrile with internal standard (40 ng/mL warfarin) to each well. The final concentration of each component applied in this reaction was liver microsome protein at 0.5 mg/mL, EDTA at 1 mM, compound at 10  $\mu$ M, NADPH A at 1.3 mM, and NADPH B at 0.4 U/mL. All plates were sealed and mixed well at 600 rpm for 10 min after quenching and were centrifuged at 4000 rpm for 20 min. The supernatants were transferred to analytical plates and diluted by millipore water for analysis by LC-MS/MS. Conditions for SCIEX Qtrap UHPLC-MS/MS system are described separately. The metabolic stability was evaluated via the half-life from least-squares fit of the multiple time points based on first-order kinetics.

## REFERENCES:

- (1) Courcot, B.; Bridgeman, A. J. Modeling the Interactions between Polyoxometalates and Their Environment. *J. Comput. Chem.* **2011**, *32* (15), 3143–3153.  
<https://doi.org/10.1002/jcc.21894>.
- (2) Molecular Operating Environment (MOE), 2019.01; Chemical Computing Group ULC, 1010 Sherbooke St. West, Suite #910, Montr.
- (3) St. Jude's Cloud PeCAN Data Portal: <https://Pecan.Stjude.Cloud/Home>.
- (4) Milde, T.; Lodrini, M.; Savelyeva, L.; Korshunov, A.; Kool, M.; Brueckner, L. M.; Antunes, A. S. L. M.; Oehme, I.; Pekrun, A.; Pfister, S. M.; Kulozik, A. E.; Witt, O.; Deubzer, H. E. HD-MB03 Is a Novel Group 3 Medulloblastoma Model Demonstrating Sensitivity to Histone Deacetylase Inhibitor Treatment. *J Neurooncol* **2012**, *110* (3), 335–348.  
<https://doi.org/10.1007/s11060-012-0978-1>.
- (5) Bandopadhyay, P.; Bergthold, G.; Nguyen, B.; Schubert, S.; Gholamin, S.; Tang, Y.; Bolin, S.; Schumacher, S. E.; Zeid, R.; Masoud, S.; Yu, F.; Vue, N.; Gibson, W. J.; Paoletta, B. R.; Mitra, S. S.; Cheshier, S. H.; Qi, J.; Liu, K.-W.; Wechsler-Reya, R.; Weiss, W. A.; Swartling, F. J.; Kieran, M. W.; Bradner, J. E.; Beroukhi, R.; Cho, Y.-J. BET Bromodomain Inhibition of MYC-Amplified Medulloblastoma. *Clinical Cancer Research* **2014**, *20* (4), 912–925.  
<https://doi.org/10.1158/1078-0432.CCR-13-2281>.
- (6) Shadrick, W. R.; Slavish, P. J.; Chai, S. C.; Waddell, B.; Connelly, M.; Low, J. A.; Tallant, C.; Young, B. M.; Bharatham, N.; Knapp, S.; Boyd, V. A.; Morfouace, M.; Roussel, M. F.; Chen, T.; Lee, R. E.; Kiplin, R.; Shelat, A. A.; Potter, P. M. Exploiting a Water Network to Achieve Enthalpy-Driven, Bromodomain-Selective BET Inhibitors. *Bioorganic & Medicinal Chemistry* **2018**, *26* (1), 25–36. <https://doi.org/10.1016/j.bmc.2017.10.042>.

- (7) Waters, N. J.; Jones, R.; Williams, G.; Sohal, B. Validation of a Rapid Equilibrium Dialysis Approach for the Measurement of Plasma Protein Binding. *Journal of Pharmaceutical Sciences* **2008**, *97* (10), 4586–4595. <https://doi.org/10.1002/jps.21317>.
- (8) Larson, B.; Banks, P.; Sherman, H.; Rothenberg, M. Automation of Cell-Based Drug Absorption Assays in 96-Well Format Using Permeable Support Systems. *J Lab Autom.* **2012**, *17* (3), 222–232. <https://doi.org/10.1177/2211068211428190>.
- (9) Uchida, M.; Fukazawa, T.; Yamazaki, Y.; Hashimoto, H.; Miyamoto, Y. A Modified Fast (4 Day) 96-Well Plate Caco-2 Permeability Assay. *Journal of Pharmacological and Toxicological Methods* **2009**, *59* (1), 39–43. <https://doi.org/10.1016/j.vascn.2008.10.006>.
- (10) Di, L.; Kerns, E. H.; Li, S. Q.; Petusky, S. L. High Throughput Microsomal Stability Assay for Insoluble Compounds. *International Journal of Pharmaceutics* **2006**, *317* (1), 54–60. <https://doi.org/10.1016/j.ijpharm.2006.03.007>.
- (11) Di, L.; Kerns, E.; Ma, X.; Huang, Y.; Carter, G. Applications of High Throughput Microsomal Stability Assay in Drug Discovery. *CCHTS* **2008**, *11* (6), 469–476. <https://doi.org/10.2174/138620708784911429>.

## Coordinates of the in Silico model of GSPT1-6-CRBN/DDB1 complex

```

HEADER      LIGASE
REMARK      99
REMARK      99 MOE v2020.09 (Chemical Computing Group ULC) Tue Apr 20 12:11:48
2021
SEQRES      1 X  607  GLY SER  GLY PRO  ILE ARG LEU PRO  ILE VAL ASP LYS TYR
SEQRES      2 X  607  LYS ASP MET  GLY THR VAL VAL LEU GLY LYS LEU GLU SER
SEQRES      3 X  607  GLY SER  ILE CYS LYS GLY GLN GLN LEU VAL MET MET PRO
SEQRES      4 X  607  ASN LYS  HIE ASN VAL GLU VAL LEU GLY ILE LEU SER ASP
SEQRES      5 X  607  ASP VAL GLU  THR ASP THR VAL ALA PRO GLY GLU ASN LEU
SEQRES      6 X  607  LYS ILE ARG  LEU LYS GLY ILE GLU GLU GLU ILE LEU
SEQRES      7 X  607  PRO GLY PHE  ILE LEU CYX ASP PRO ASN ASN LEU CYX HIE
SEQRES      8 X  607  SER GLY ARG  THR PHE ASP ALA GLN ILE VAL ILE ILE GLU
SEQRES      9 X  607  HIE LYS SER  ILE ILE CYS PRO GLY TYR ASN ALA VAL LEU
SEQRES     10 X  607  HIE ILE HIE  THR CYS ILE GLU GLU VAL GLU ILE THR ALA
SEQRES     11 X  607  LEU ILE CYS  LEU VAL ASP LYS LYS SER GLY GLU LYS SER
SEQRES     12 X  607  LYS THR ARG  PRO ARG PHE VAL LYS GLN ASP GLN VAL CYS
SEQRES     13 X  607  ILE ALA ARG  LEU ARG THR ALA GLY THR ILE CYS LEU GLU
SEQRES     14 X  607  THR PHE LYS  ASP PHE PRO GLN MET GLY ARG PHE THR LEU
SEQRES     15 X  607  ARG ASP GLU  GLY LYS THR ILE ALA ILE GLY LYS VAL LEU
SEQRES     16 X  607  LYS LEU VAL  PRO GLY SER MET GLU ALA LYS LYS PRO ASN
SEQRES     17 X  607  ILE ILE ASN  PHE ASP THR SER LEU PRO THR SER HIE THR
SEQRES     18 X  607  TYR LEU GLY  ALA ASP MET GLU GLU PHE HIE GLY ARG THR
SEQRES     19 X  607  LEU HIP ASP  ASP ASP SER CYS GLN VAL ILE PRO VAL LEU
SEQRES     20 X  607  PRO GLN VAL  MET MET ILE LEU ILE PRO GLY GLN THR LEU
SEQRES     21 X  607  PRO LEU GLN  LEU PHE HIE PRO GLN GLU VAL SER MET VAL
SEQRES     22 X  607  ARG ASN LEU  ILE GLN LYS ASP ARG THR PHE ALA VAL LEU
SEQRES     23 X  607  ALA TYR SER  ASN VAL GLN GLU ARG GLU ALA GLN PHE GLY
SEQRES     24 X  607  THR THR ALA  GLU ILE TYR ALA TYR ARG GLU GLU GLN ASP
SEQRES     25 X  607  PHE GLY ILE  GLU ILE VAL LYS VAL LYS ALA ILE GLY ARG
SEQRES     26 X  607  GLN ARG PHE  LYS VAL LEU GLU LEU ARG THR GLN SER ASP
SEQRES     27 X  607  GLY ILE GLN  GLN ALA LYS VAL GLN ILE LEU PRO GLU CYS
SEQRES     28 X  607  VAL LEU PRO  SER THR MET SER ALA VAL GLN LEU GLU SER
SEQRES     29 X  607  LEU ASN LYS  CYS GLN ILE PHE PRO SER LYS PRO VAL SER
SEQRES     30 X  607  ARG GLU ASP  GLN CYS SER TYR LYS TRP TRP GLN LYS TYR
SEQRES     31 X  607  GLN LYS ARG  LYS PHE HID CYS ALA ASN LEU THR SER TRP
SEQRES     32 X  607  PRO ARG TRP  LEU TYR SER LEU TYR ASP ALA GLU THR LEU
SEQRES     33 X  607  MET ASP ARG  ILE LYS LYS GLN LEU ARG GLU TRP ASP GLU
SEQRES     34 X  607  ASN LEU LYS  ASP ASP SER LEU PRO SER ASN PRO ILE ASP
SEQRES     35 X  607  PHE SER TYR  ARG VAL ALA ALA CYS LEU PRO ILE ASP ASP
SEQRES     36 X  607  VAL LEU ARG  ILE GLN LEU LEU LYS ILE GLY SER ALA ILE
SEQRES     37 X  607  GLN ARG LEU  ARG CYX GLU LEU ASP ILE MET ASN LYS CYS
SEQRES     38 X  607  THR SER LEU  CYS CYM LYS GLN CYM GLN GLU THR GLU ILE
SEQRES     39 X  607  THR THR LYS  ASN GLU ILE PHE SER LEU SER LEU CYS GLY
SEQRES     40 X  607  PRO MET ALA  ALA TYR VAL ASN PRO HIP GLY TYR VAL HIP
SEQRES     41 X  607  GLU THR LEU  THR VAL TYR LYS ALA CYS ASN LEU ASN LEU
SEQRES     42 X  607  ILE GLY ARG  PRO SER THR GLU HIP SER TRP PHE PRO GLY
SEQRES     43 X  607  TYR ALA TRP  THR VAL ALA GLN CYM LYS ILE CYM ALA SER
SEQRES     44 X  607  HIE ILE GLY  TRP LYS PHE THR ALA THR LYS LYS ASP MET
SEQRES     45 X  607  SER PRO GLN  LYS PHE TRP GLY LEU THR ARG SER ALA LEU
SEQRES     46 X  607  LEU PRO THR  ILE PRO ASP THR GLU ASP GLU ILE SER PRO
SEQRES     47 X  607  ASP LYS VAL  ILE LEU CYX LEU  ZN 85C

```

|        |    |     |     |     |     |     |     |     |     |     |     |     |     |     |                  |
|--------|----|-----|-----|-----|-----|-----|-----|-----|-----|-----|-----|-----|-----|-----|------------------|
| SEQRES | 1  | 594 | ACE | ILE | ARG | LEU | PRO | ILE | VAL | ASP | LYS | TYR | LYS | ASP | MET              |
| SEQRES | 2  | 594 | GLY | THR | VAL | VAL | LEU | GLY | LYS | LEU | GLU | SER | GLY | SER | ILE              |
| SEQRES | 3  | 594 | CYS | LYS | GLY | GLN | GLN | LEU | VAL | MET | MET | PRO | ASN | LYS | HIE              |
| SEQRES | 4  | 594 | ASN | VAL | GLU | VAL | LEU | GLY | ILE | LEU | SER | ASP | ASP | VAL | GLU              |
| SEQRES | 5  | 594 | THR | ASP | THR | VAL | ALA | PRO | GLY | GLU | ASN | LEU | LYS | ILE | ARG              |
| SEQRES | 6  | 594 | LEU | LYS | GLY | ILE | GLU | GLU | GLU | GLU | ILE | LEU | PRO | GLY | PHE              |
| SEQRES | 7  | 594 | ILE | LEU | CYX | ASP | PRO | ASN | ASN | LEU | CYX | HIE | SER | GLY | ARG              |
| SEQRES | 8  | 594 | THR | PHE | ASP | ALA | GLN | ILE | VAL | ILE | ILE | GLU | HIE | LYS | SER              |
| SEQRES | 9  | 594 | ILE | ILE | CYS | PRO | GLY | TYR | ASN | ALA | VAL | LEU | HIE | ILE | HIE              |
| SEQRES | 10 | 594 | THR | CYS | ILE | GLU | GLU | VAL | GLU | ILE | THR | ALA | LEU | ILE | CYS              |
| SEQRES | 11 | 594 | LEU | VAL | ASP | LYS | LYS | SER | GLY | GLU | LYS | SER | LYS | THR | ARG              |
| SEQRES | 12 | 594 | PRO | ARG | PHE | VAL | LYS | GLN | ASP | GLN | VAL | CYS | ILE | ALA | ARG              |
| SEQRES | 13 | 594 | LEU | ARG | THR | ALA | GLY | THR | ILE | CYS | LEU | GLU | THR | PHE | LYS              |
| SEQRES | 14 | 594 | ASP | PHE | PRO | GLN | MET | GLY | ARG | PHE | THR | LEU | ARG | ASP | GLU              |
| SEQRES | 15 | 594 | GLY | LYS | THR | ILE | ALA | ILE | GLY | LYS | VAL | LEU | LYS | LEU | VAL              |
| SEQRES | 16 | 594 | PRO | ACE | ASN | PHE | ASP | THR | SER | LEU | PRO | THR | SER | HIE | THR              |
| SEQRES | 17 | 594 | TYR | LEU | GLY | ALA | ASP | MET | GLU | GLU | PHE | HIE | GLY | ARG | THR              |
| SEQRES | 18 | 594 | LEU | HIP | ASP | ASP | ASP | SER | CYS | GLN | VAL | ILE | PRO | VAL | LEU              |
| SEQRES | 19 | 594 | PRO | GLN | VAL | MET | MET | ILE | LEU | ILE | PRO | GLY | GLN | THR | LEU              |
| SEQRES | 20 | 594 | PRO | LEU | GLN | LEU | PHE | HIE | PRO | GLN | GLU | VAL | SER | MET | VAL              |
| SEQRES | 21 | 594 | ARG | ASN | LEU | ILE | GLN | LYS | ASP | ARG | THR | PHE | ALA | VAL | LEU              |
| SEQRES | 22 | 594 | ALA | TYR | SER | ASN | VAL | GLN | GLU | ARG | GLU | ALA | GLN | PHE | GLY              |
| SEQRES | 23 | 594 | THR | THR | ALA | GLU | ILE | TYR | ALA | TYR | ARG | GLU | GLU | GLN | ASP              |
| SEQRES | 24 | 594 | PHE | GLY | ILE | GLU | ILE | VAL | LYS | VAL | LYS | ALA | ILE | GLY | ARG              |
| SEQRES | 25 | 594 | GLN | ARG | PHE | LYS | VAL | LEU | GLU | LEU | ARG | THR | GLN | SER | ASP              |
| SEQRES | 26 | 594 | GLY | ILE | GLN | GLN | ALA | LYS | VAL | GLN | ILE | LEU | PRO | GLU | CYS              |
| SEQRES | 27 | 594 | VAL | LEU | PRO | SER | THR | MET | SER | ALA | VAL | GLN | LEU | GLU | SER              |
| SEQRES | 28 | 594 | LEU | ASN | LYS | CYS | GLN | ILE | PHE | PRO | SER | LYS | PRO | VAL | SER              |
| SEQRES | 29 | 594 | ARG | GLU | ASP | GLN | CYS | SER | TYR | LYS | TRP | TRP | GLN | LYS | TYR              |
| SEQRES | 30 | 594 | GLN | LYS | ARG | LYS | PHE | HID | CYS | ALA | ASN | LEU | THR | SER | TRP              |
| SEQRES | 31 | 594 | PRO | ARG | TRP | LEU | TYR | SER | LEU | TYR | ASP | ALA | GLU | THR | LEU              |
| SEQRES | 32 | 594 | MET | ASP | ARG | ILE | LYS | LYS | GLN | LEU | ARG | GLU | TRP | ASP | GLU              |
| SEQRES | 33 | 594 | ASN | LEU | LYS | ASP | ASP | SER | LEU | PRO | SER | ASN | PRO | ILE | ASP              |
| SEQRES | 34 | 594 | PHE | SER | TYR | ARG | VAL | ALA | ALA | CYS | LEU | PRO | ILE | ASP | ASP              |
| SEQRES | 35 | 594 | VAL | LEU | ARG | ILE | GLN | LEU | LEU | LYS | ILE | GLY | SER | ALA | ILE              |
| SEQRES | 36 | 594 | GLN | ARG | LEU | ARG | CYX | GLU | LEU | ASP | ILE | MET | ASN | LYS | CYS              |
| SEQRES | 37 | 594 | THR | SER | LEU | CYS | CYM | LYS | GLN | CYM | GLN | GLU | THR | GLU | ILE              |
| SEQRES | 38 | 594 | THR | THR | LYS | ASN | GLU | ILE | PHE | SER | LEU | SER | LEU | CYS | GLY              |
| SEQRES | 39 | 594 | PRO | MET | ALA | ALA | TYR | VAL | ASN | PRO | HIE | GLY | TYR | VAL | HIP              |
| SEQRES | 40 | 594 | GLU | THR | LEU | THR | VAL | TYR | LYS | ALA | CYS | ASN | LEU | ASN | LEU              |
| SEQRES | 41 | 594 | ILE | GLY | ARG | PRO | SER | THR | GLU | HIP | SER | TRP | PHE | PRO | GLY              |
| SEQRES | 42 | 594 | TYR | ALA | TRP | THR | VAL | ALA | GLN | CYM | LYS | ILE | CYM | ALA | SER              |
| SEQRES | 43 | 594 | HIE | ILE | GLY | TRP | LYS | PHE | THR | ALA | THR | LYS | LYS | ASP | MET              |
| SEQRES | 44 | 594 | SER | PRO | GLN | LYS | PHE | TRP | GLY | LEU | THR | ARG | SER | ALA | LEU              |
| SEQRES | 45 | 594 | LEU | PRO | THR | ILE | PRO | ASP | THR | GLU | ASP | GLU | ILE | SER | PRO              |
| SEQRES | 46 | 594 | ASP | LYS | VAL | ILE | LEU | CYX | LEU | ZN  | 85C |     |     |     |                  |
| HELIX  | 1  | 1   | PRO | X   | 54  | SER | X   | 56  | 5   |     |     |     |     |     | Generated by MOE |
| 3      |    |     |     |     |     |     |     |     |     |     |     |     |     |     |                  |
| HELIX  | 2  | 2   | THR | X   | 58  | LEU | X   | 60  | 5   |     |     |     |     |     | Generated by MOE |
| 3      |    |     |     |     |     |     |     |     |     |     |     |     |     |     |                  |
| HELIX  | 3  | 3   | PRO | X   | 104 | GLN | X   | 115 | 1   |     |     |     |     |     | Generated by MOE |
| 12     |    |     |     |     |     |     |     |     |     |     |     |     |     |     |                  |
| HELIX  | 4  | 4   | ASN | X   | 127 | GLN | X   | 129 | 5   |     |     |     |     |     | Generated by MOE |
| 3      |    |     |     |     |     |     |     |     |     |     |     |     |     |     |                  |



|             |    |    |       |     |       |     |   |                  |
|-------------|----|----|-------|-----|-------|-----|---|------------------|
| HELIX<br>6  | 5  | 5  | GLU X | 200 | CYS X | 205 | 5 | Generated by MOE |
| HELIX<br>10 | 6  | 6  | LYS X | 222 | LYS X | 231 | 1 | Generated by MOE |
| HELIX<br>5  | 7  | 7  | HID X | 233 | LEU X | 237 | 5 | Generated by MOE |
| HELIX<br>4  | 8  | 8  | ARG X | 242 | TYR X | 245 | 1 | Generated by MOE |
| HELIX<br>3  | 9  | 9  | SER X | 246 | TYR X | 248 | 5 | Generated by MOE |
| HELIX<br>14 | 10 | 10 | ALA X | 250 | GLU X | 263 | 1 | Generated by MOE |
| HELIX<br>11 | 11 | 11 | PRO X | 277 | CYS X | 287 | 1 | Generated by MOE |
| HELIX<br>9  | 12 | 12 | ASP X | 292 | LYS X | 300 | 1 | Generated by MOE |
| HELIX<br>14 | 13 | 13 | ALA X | 304 | LYS X | 317 | 1 | Generated by MOE |
| HELIX<br>3  | 14 | 14 | LYS X | 334 | GLU X | 336 | 5 | Generated by MOE |
| HELIX<br>3  | 15 | 15 | ARG X | 419 | ALA X | 421 | 5 | Generated by MOE |
| HELIX<br>4  | 16 | 16 | PRO   | 172 | GLY   | 175 | 1 | Generated by MOE |
| HELIX<br>4  | 17 | 17 | SER   | 202 | THR   | 205 | 1 | Generated by MOE |
| HELIX<br>3  | 18 | 18 | THR   | 208 | LEU   | 210 | 5 | Generated by MOE |
| HELIX<br>13 | 19 | 19 | PRO   | 254 | LYS   | 266 | 1 | Generated by MOE |
| HELIX<br>3  | 20 | 20 | GLU   | 350 | LEU   | 352 | 5 | Generated by MOE |
| HELIX<br>3  | 21 | 21 | ARG   | 365 | ASP   | 367 | 5 | Generated by MOE |
| HELIX<br>8  | 22 | 22 | TRP   | 374 | LYS   | 381 | 1 | Generated by MOE |
| HELIX<br>4  | 23 | 23 | HID   | 383 | ASN   | 386 | 1 | Generated by MOE |
| HELIX<br>4  | 24 | 24 | ARG   | 392 | TYR   | 395 | 1 | Generated by MOE |
| HELIX<br>14 | 25 | 25 | ALA   | 400 | GLU   | 413 | 1 | Generated by MOE |
| HELIX<br>9  | 26 | 26 | PRO   | 427 | ALA   | 435 | 1 | Generated by MOE |
| HELIX<br>9  | 27 | 27 | ASP   | 442 | LYS   | 450 | 1 | Generated by MOE |
| HELIX<br>14 | 28 | 28 | ALA   | 454 | LYS   | 467 | 1 | Generated by MOE |
| HELIX<br>3  | 29 | 29 | LYS   | 484 | GLU   | 486 | 5 | Generated by MOE |
| HELIX<br>4  | 30 | 30 | PRO   | 172 | GLY   | 175 | 1 | Generated by MOE |
| HELIX<br>4  | 31 | 31 | SER   | 202 | THR   | 205 | 1 | Generated by MOE |

|       |    |    |           |     |           |     |   |                  |
|-------|----|----|-----------|-----|-----------|-----|---|------------------|
| HELIX | 32 | 32 | THR       | 208 | LEU       | 210 | 5 | Generated by MOE |
| 3     |    |    |           |     |           |     |   |                  |
| HELIX | 33 | 33 | PRO       | 254 | LYS       | 266 | 1 | Generated by MOE |
| 13    |    |    |           |     |           |     |   |                  |
| HELIX | 34 | 34 | GLU       | 350 | LEU       | 352 | 5 | Generated by MOE |
| 3     |    |    |           |     |           |     |   |                  |
| HELIX | 35 | 35 | ARG       | 365 | ASP       | 367 | 5 | Generated by MOE |
| 3     |    |    |           |     |           |     |   |                  |
| HELIX | 36 | 36 | TRP       | 374 | LYS       | 381 | 1 | Generated by MOE |
| 8     |    |    |           |     |           |     |   |                  |
| HELIX | 37 | 37 | HID       | 383 | ASN       | 386 | 1 | Generated by MOE |
| 4     |    |    |           |     |           |     |   |                  |
| HELIX | 38 | 38 | ARG       | 392 | TYR       | 395 | 1 | Generated by MOE |
| 4     |    |    |           |     |           |     |   |                  |
| HELIX | 39 | 39 | ALA       | 400 | GLU       | 413 | 1 | Generated by MOE |
| 14    |    |    |           |     |           |     |   |                  |
| HELIX | 40 | 40 | PRO       | 427 | ALA       | 435 | 1 | Generated by MOE |
| 9     |    |    |           |     |           |     |   |                  |
| HELIX | 41 | 41 | ASP       | 442 | LYS       | 450 | 1 | Generated by MOE |
| 9     |    |    |           |     |           |     |   |                  |
| HELIX | 42 | 42 | ALA       | 454 | LYS       | 467 | 1 | Generated by MOE |
| 14    |    |    |           |     |           |     |   |                  |
| HELIX | 43 | 43 | LYS       | 484 | GLU       | 486 | 5 | Generated by MOE |
| 3     |    |    |           |     |           |     |   |                  |
| SHEET | 1  |    | ARG X 441 |     | LYS X 447 |     |   | Generated by MOE |
| SHEET | 2  |    | VAL X 455 |     | GLY X 457 |     |   | Generated by MOE |
| SHEET | 3  |    | ILE X 464 |     | CYS X 465 |     |   | Generated by MOE |
| SHEET | 4  |    | LEU X 470 |     | MET X 472 |     |   | Generated by MOE |
| SHEET | 5  |    | HIE X 477 |     | ILE X 484 |     |   | Generated by MOE |
| SHEET | 6  |    | THR X 493 |     | VAL X 494 |     |   | Generated by MOE |
| SHEET | 7  |    | LYS X 501 |     | LYS X 505 |     |   | Generated by MOE |
| SHEET | 8  |    | ILE X 517 |     | CYX X 519 |     |   | Generated by MOE |
| SHEET | 9  |    | GLY X 528 |     | ILE X 537 |     |   | Generated by MOE |
| SHEET | 10 |    | TYR X 548 |     | ILE X 554 |     |   | Generated by MOE |
| SHEET | 11 |    | CYS X 557 |     | LEU X 566 |     |   | Generated by MOE |
| SHEET | 12 |    | GLN X 589 |     | ILE X 601 |     |   | Generated by MOE |
| SHEET | 13 |    | ARG X 614 |     | ASP X 619 |     |   | Generated by MOE |
| SHEET | 14 |    | LYS X 622 |     | VAL X 629 |     |   | Generated by MOE |
| SHEET | 15 |    | GLU X 65  |     | GLU X 66  |     |   | Generated by MOE |
| SHEET | 16 |    | CYS X 78  |     | VAL X 83  |     |   | Generated by MOE |
| SHEET | 17 |    | THR X 96  |     | LEU X 101 |     |   | Generated by MOE |
| SHEET | 18 |    | THR X 119 |     | ALA X 124 |     |   | Generated by MOE |
| SHEET | 19 |    | PHE X 135 |     | GLU X 147 |     |   | Generated by MOE |
| SHEET | 20 |    | ILE X 154 |     | ILE X 160 |     |   | Generated by MOE |
| SHEET | 21 |    | GLY X 161 |     | GLY X 161 |     |   | Generated by MOE |
| SHEET | 22 |    | ARG X 162 |     | ARG X 171 |     |   | Generated by MOE |
| SHEET | 23 |    | GLN X 178 |     | ILE X 184 |     |   | Generated by MOE |
| SHEET | 24 |    | SER X 320 |     | CYM X 323 |     |   | Generated by MOE |
| SHEET | 25 |    | GLU X 330 |     | THR X 333 |     |   | Generated by MOE |
| SHEET | 26 |    | MET X 346 |     | VAL X 350 |     |   | Generated by MOE |
| SHEET | 27 |    | VAL X 356 |     | VAL X 362 |     |   | Generated by MOE |
| SHEET | 28 |    | LEU X 368 |     | SER X 375 |     |   | Generated by MOE |
| SHEET | 29 |    | TYR X 384 |     | CYM X 391 |     |   | Generated by MOE |
| SHEET | 30 |    | HIE X 397 |     | ALA X 404 |     |   | Generated by MOE |

|       |    |           |           |                  |
|-------|----|-----------|-----------|------------------|
| SHEET | 31 | LYS X 413 | THR X 418 | Generated by MOE |
| SHEET | 32 | LEU X 422 | THR X 425 | Generated by MOE |
| SHEET | 33 | ARG 3     | TYR 10    | Generated by MOE |
| SHEET | 34 | VAL 16    | GLY 19    | Generated by MOE |
| SHEET | 35 | GLN 31    | MET 35    | Generated by MOE |
| SHEET | 36 | HIE 39    | ILE 46    | Generated by MOE |
| SHEET | 37 | LEU 62    | LEU 66    | Generated by MOE |
| SHEET | 38 | ILE 79    | CYX 81    | Generated by MOE |
| SHEET | 39 | HIE 88    | ILE 99    | Generated by MOE |
| SHEET | 40 | TYR 110   | ILE 116   | Generated by MOE |
| SHEET | 41 | CYS 119   | VAL 132   | Generated by MOE |
| SHEET | 42 | VAL 152   | LEU 165   | Generated by MOE |
| SHEET | 43 | ARG 176   | ASP 181   | Generated by MOE |
| SHEET | 44 | LYS 184   | LEU 194   | Generated by MOE |
| SHEET | 45 | GLU 215   | GLU 216   | Generated by MOE |
| SHEET | 46 | CYS 228   | PRO 232   | Generated by MOE |
| SHEET | 47 | THR 246   | LEU 251   | Generated by MOE |
| SHEET | 48 | THR 269   | PHE 270   | Generated by MOE |
| SHEET | 49 | ALA 271   | ALA 271   | Generated by MOE |
| SHEET | 50 | VAL 272   | TYR 275   | Generated by MOE |
| SHEET | 51 | ALA 283   | GLU 297   | Generated by MOE |
| SHEET | 52 | ILE 304   | ARG 321   | Generated by MOE |
| SHEET | 53 | GLN 329   | ILE 334   | Generated by MOE |
| SHEET | 54 | LEU 471   | CYM 473   | Generated by MOE |
| SHEET | 55 | GLU 480   | THR 482   | Generated by MOE |
| SHEET | 56 | MET 496   | VAL 500   | Generated by MOE |
| SHEET | 57 | VAL 506   | VAL 512   | Generated by MOE |
| SHEET | 58 | LEU 518   | SER 525   | Generated by MOE |
| SHEET | 59 | TYR 534   | CYM 541   | Generated by MOE |
| SHEET | 60 | HIE 547   | ALA 554   | Generated by MOE |
| SHEET | 61 | LYS 563   | THR 568   | Generated by MOE |
| SHEET | 62 | LEU 572   | PRO 574   | Generated by MOE |
| SHEET | 63 | ARG 3     | TYR 10    | Generated by MOE |
| SHEET | 64 | VAL 16    | GLY 19    | Generated by MOE |
| SHEET | 65 | GLN 31    | MET 35    | Generated by MOE |
| SHEET | 66 | HIE 39    | ILE 46    | Generated by MOE |
| SHEET | 67 | LEU 62    | LEU 66    | Generated by MOE |
| SHEET | 68 | ILE 79    | CYX 81    | Generated by MOE |
| SHEET | 69 | HIE 88    | ILE 99    | Generated by MOE |
| SHEET | 70 | TYR 110   | ILE 116   | Generated by MOE |
| SHEET | 71 | CYS 119   | VAL 132   | Generated by MOE |
| SHEET | 72 | VAL 152   | LEU 165   | Generated by MOE |
| SHEET | 73 | ARG 176   | ASP 181   | Generated by MOE |
| SHEET | 74 | LYS 184   | LEU 194   | Generated by MOE |
| SHEET | 75 | GLU 215   | GLU 216   | Generated by MOE |
| SHEET | 76 | CYS 228   | PRO 232   | Generated by MOE |
| SHEET | 77 | THR 246   | LEU 251   | Generated by MOE |
| SHEET | 78 | THR 269   | PHE 270   | Generated by MOE |
| SHEET | 79 | ALA 271   | ALA 271   | Generated by MOE |
| SHEET | 80 | VAL 272   | TYR 275   | Generated by MOE |
| SHEET | 81 | ALA 283   | GLU 297   | Generated by MOE |
| SHEET | 82 | ILE 304   | ARG 321   | Generated by MOE |
| SHEET | 83 | GLN 329   | ILE 334   | Generated by MOE |
| SHEET | 84 | LEU 471   | CYM 473   | Generated by MOE |

|       |    |    |     |     |     |                |        |      |      |                  |      |      |
|-------|----|----|-----|-----|-----|----------------|--------|------|------|------------------|------|------|
| SHEET | 85 |    | GLU | 480 | THR | 482            |        |      |      | Generated by MOE |      |      |
| SHEET | 86 |    | MET | 496 | VAL | 500            |        |      |      | Generated by MOE |      |      |
| SHEET | 87 |    | VAL | 506 | VAL | 512            |        |      |      | Generated by MOE |      |      |
| SHEET | 88 |    | LEU | 518 | SER | 525            |        |      |      | Generated by MOE |      |      |
| SHEET | 89 |    | TYR | 534 | CYM | 541            |        |      |      | Generated by MOE |      |      |
| SHEET | 90 |    | HIE | 547 | ALA | 554            |        |      |      | Generated by MOE |      |      |
| SHEET | 91 |    | LYS | 563 | THR | 568            |        |      |      | Generated by MOE |      |      |
| SHEET | 92 |    | LEU | 572 | PRO | 574            |        |      |      | Generated by MOE |      |      |
| LINK  |    | SG | CYX | X   | 519 |                | SG     | CYX  | X    | 525              | 1555 | 1555 |
| 2.06  |    |    |     |     |     |                |        |      |      |                  |      |      |
| LINK  |    | SG | CYX | X   | 310 |                | SG     | CYX  | X    | 441              | 1555 | 1555 |
| 1.97  |    |    |     |     |     |                |        |      |      |                  |      |      |
| LINK  |    | SG | CYX |     | 81  |                | SG     | CYX  |      | 87               | 1555 | 1555 |
| 2.05  |    |    |     |     |     |                |        |      |      |                  |      |      |
| LINK  |    | SG | CYX |     | 460 |                | SG     | CYX  |      | 591              | 1555 | 1555 |
| 2.03  |    |    |     |     |     |                |        |      |      |                  |      |      |
| LINK  |    | SG | CYX |     | 81  |                | SG     | CYX  |      | 87               | 1555 | 1555 |
| 2.05  |    |    |     |     |     |                |        |      |      |                  |      |      |
| LINK  |    | SG | CYX |     | 460 |                | SG     | CYX  |      | 591              | 1555 | 1555 |
| 2.03  |    |    |     |     |     |                |        |      |      |                  |      |      |
| ATOM  | 1  | N  | GLY | X   | 436 | 39.709-125.519 | 22.250 | 1.00 | 0.00 |                  |      |      |
| N1+   |    |    |     |     |     |                |        |      |      |                  |      |      |
| ATOM  | 2  | CA | GLY | X   | 436 | 39.617-126.856 | 22.880 | 1.00 | 0.00 |                  |      |      |
| C     |    |    |     |     |     |                |        |      |      |                  |      |      |
| ATOM  | 3  | C  | GLY | X   | 436 | 38.333-127.496 | 22.364 | 1.00 | 0.00 |                  |      |      |
| C     |    |    |     |     |     |                |        |      |      |                  |      |      |
| ATOM  | 4  | O  | GLY | X   | 436 | 38.340-127.874 | 21.201 | 1.00 | 0.00 |                  |      |      |
| O     |    |    |     |     |     |                |        |      |      |                  |      |      |
| ATOM  | 5  | N  | SER | X   | 437 | 37.200-127.268 | 23.038 | 1.00 | 0.00 |                  |      |      |
| N     |    |    |     |     |     |                |        |      |      |                  |      |      |
| ATOM  | 6  | CA | SER | X   | 437 | 35.953-126.973 | 22.324 | 1.00 | 0.00 |                  |      |      |
| C     |    |    |     |     |     |                |        |      |      |                  |      |      |
| ATOM  | 7  | C  | SER | X   | 437 | 36.092-125.664 | 21.510 | 1.00 | 0.00 |                  |      |      |
| C     |    |    |     |     |     |                |        |      |      |                  |      |      |
| ATOM  | 8  | O  | SER | X   | 437 | 37.026-124.883 | 21.745 | 1.00 | 0.00 |                  |      |      |
| O     |    |    |     |     |     |                |        |      |      |                  |      |      |
| ATOM  | 9  | CB | SER | X   | 437 | 34.801-126.876 | 23.333 | 1.00 | 0.00 |                  |      |      |
| C     |    |    |     |     |     |                |        |      |      |                  |      |      |
| ATOM  | 10 | OG | SER | X   | 437 | 33.565-126.710 | 22.669 | 1.00 | 0.00 |                  |      |      |
| O     |    |    |     |     |     |                |        |      |      |                  |      |      |
| ATOM  | 11 | N  | GLY | X   | 438 | 35.170-125.435 | 20.576 | 1.00 | 0.00 |                  |      |      |
| N     |    |    |     |     |     |                |        |      |      |                  |      |      |
| ATOM  | 12 | CA | GLY | X   | 438 | 35.022-124.223 | 19.769 | 1.00 | 0.00 |                  |      |      |
| C     |    |    |     |     |     |                |        |      |      |                  |      |      |
| ATOM  | 13 | C  | GLY | X   | 438 | 33.529-124.037 | 19.394 | 1.00 | 0.00 |                  |      |      |
| C     |    |    |     |     |     |                |        |      |      |                  |      |      |
| ATOM  | 14 | O  | GLY | X   | 438 | 32.753-124.963 | 19.618 | 1.00 | 0.00 |                  |      |      |
| O     |    |    |     |     |     |                |        |      |      |                  |      |      |
| ATOM  | 15 | N  | PRO | X   | 439 | 33.106-122.870 | 18.866 | 1.00 | 0.00 |                  |      |      |
| N     |    |    |     |     |     |                |        |      |      |                  |      |      |
| ATOM  | 16 | CD | PRO | X   | 439 | 33.492-121.590 | 19.449 | 1.00 | 0.00 |                  |      |      |
| C     |    |    |     |     |     |                |        |      |      |                  |      |      |
| ATOM  | 17 | CG | PRO | X   | 439 | 32.176-120.858 | 19.758 | 1.00 | 0.00 |                  |      |      |
| C     |    |    |     |     |     |                |        |      |      |                  |      |      |

|             |    |     |           |                |        |      |        |
|-------------|----|-----|-----------|----------------|--------|------|--------|
| ATOM<br>C   | 18 | CB  | PRO X 439 | 31.065-121.811 | 19.293 | 1.00 | 0.00   |
| ATOM<br>C   | 19 | CA  | PRO X 439 | 31.772-122.708 | 18.277 | 1.00 | 0.00   |
| ATOM<br>C   | 20 | C   | PRO X 439 | 31.783-122.047 | 16.880 | 1.00 | 0.00   |
| ATOM<br>O   | 21 | O   | PRO X 439 | 32.416-121.008 | 16.684 | 1.00 | 0.00   |
| ATOM<br>N   | 22 | N   | ILE X 440 | 30.967-122.539 | 15.937 | 1.00 | 115.77 |
| ATOM<br>C   | 23 | CA  | ILE X 440 | 30.718-121.794 | 14.632 | 1.00 | 110.65 |
| ATOM<br>C   | 24 | C   | ILE X 440 | 29.330-121.935 | 14.070 | 1.00 | 102.20 |
| ATOM<br>O   | 25 | O   | ILE X 440 | 28.525-122.818 | 14.401 | 1.00 | 93.68  |
| ATOM<br>C   | 26 | CB  | ILE X 440 | 31.648-122.202 | 13.454 | 1.00 | 112.32 |
| ATOM<br>C   | 27 | CG1 | ILE X 440 | 31.609-123.714 | 13.250 | 1.00 | 114.13 |
| ATOM<br>C   | 28 | CG2 | ILE X 440 | 33.064-121.675 | 13.636 | 1.00 | 113.04 |
| ATOM<br>C   | 29 | CD1 | ILE X 440 | 31.155-124.113 | 11.883 | 1.00 | 112.87 |
| ATOM<br>N   | 30 | N   | ARG X 441 | 29.062-121.013 | 13.184 | 1.00 | 102.23 |
| ATOM<br>C   | 31 | CA  | ARG X 441 | 27.757-120.773 | 12.720 | 1.00 | 114.05 |
| ATOM<br>C   | 32 | C   | ARG X 441 | 27.844-119.825 | 11.491 | 1.00 | 118.27 |
| ATOM<br>O   | 33 | O   | ARG X 441 | 28.265-118.674 | 11.622 | 1.00 | 126.60 |
| ATOM<br>C   | 34 | CB  | ARG X 441 | 26.952-120.110 | 13.855 | 1.00 | 113.53 |
| ATOM<br>C   | 35 | CG  | ARG X 441 | 25.480-120.407 | 13.828 | 1.00 | 111.92 |
| ATOM<br>C   | 36 | CD  | ARG X 441 | 25.062-121.122 | 15.072 | 1.00 | 110.50 |
| ATOM<br>N   | 37 | NE  | ARG X 441 | 25.841-122.316 | 15.270 | 1.00 | 110.12 |
| ATOM<br>C   | 38 | CZ  | ARG X 441 | 25.564-123.204 | 16.203 | 1.00 | 120.16 |
| ATOM<br>N   | 39 | NH1 | ARG X 441 | 24.496-123.036 | 16.981 | 1.00 | 120.31 |
| ATOM<br>N1+ | 40 | NH2 | ARG X 441 | 26.320-124.285 | 16.330 | 1.00 | 128.96 |
| ATOM<br>N   | 41 | N   | LEU X 442 | 27.402-120.314 | 10.328 | 1.00 | 109.89 |
| ATOM<br>C   | 42 | CA  | LEU X 442 | 27.387-119.546 | 9.118  | 1.00 | 100.11 |
| ATOM<br>C   | 43 | C   | LEU X 442 | 26.049-119.743 | 8.444  | 1.00 | 90.29  |
| ATOM<br>O   | 44 | O   | LEU X 442 | 25.820-120.788 | 7.882  | 1.00 | 81.50  |

|           |    |     |           |                |        |            |
|-----------|----|-----|-----------|----------------|--------|------------|
| ATOM<br>C | 45 | CB  | LEU X 442 | 28.498-120.058 | 8.229  | 1.00109.36 |
| ATOM<br>C | 46 | CG  | LEU X 442 | 28.524-119.566 | 6.778  | 1.00123.48 |
| ATOM<br>C | 47 | CD1 | LEU X 442 | 28.123-118.103 | 6.608  | 1.00122.73 |
| ATOM<br>C | 48 | CD2 | LEU X 442 | 29.923-119.794 | 6.211  | 1.00132.62 |
| ATOM<br>N | 49 | N   | PRO X 443 | 25.137-118.755 | 8.556  | 1.00 91.82 |
| ATOM<br>C | 50 | CA  | PRO X 443 | 23.935-118.816 | 7.761  | 1.00 92.96 |
| ATOM<br>C | 51 | C   | PRO X 443 | 24.197-118.642 | 6.302  | 1.00 92.60 |
| ATOM<br>O | 52 | O   | PRO X 443 | 24.722-117.578 | 5.863  | 1.00 88.42 |
| ATOM<br>C | 53 | CB  | PRO X 443 | 23.081-117.662 | 8.297  | 1.00 93.91 |
| ATOM<br>C | 54 | CG  | PRO X 443 | 23.455-117.566 | 9.704  | 1.00 94.65 |
| ATOM<br>C | 55 | CD  | PRO X 443 | 24.952-117.837 | 9.692  | 1.00 97.82 |
| ATOM<br>N | 56 | N   | ILE X 444 | 23.836-119.718 | 5.583  | 1.00 88.71 |
| ATOM<br>C | 57 | CA  | ILE X 444 | 24.102-119.904 | 4.181  | 1.00 83.25 |
| ATOM<br>C | 58 | C   | ILE X 444 | 23.094-119.099 | 3.436  | 1.00 78.60 |
| ATOM<br>O | 59 | O   | ILE X 444 | 21.894-119.333 | 3.614  | 1.00 75.29 |
| ATOM<br>C | 60 | CB  | ILE X 444 | 23.908-121.374 | 3.805  | 1.00 85.21 |
| ATOM<br>C | 61 | CG1 | ILE X 444 | 24.994-122.225 | 4.469  | 1.00 88.83 |
| ATOM<br>C | 62 | CG2 | ILE X 444 | 23.940-121.546 | 2.289  | 1.00 85.56 |
| ATOM<br>C | 63 | CD1 | ILE X 444 | 24.785-123.733 | 4.340  | 1.00 93.23 |
| ATOM<br>N | 64 | N   | VAL X 445 | 23.568-118.240 | 2.526  | 1.00 77.46 |
| ATOM<br>C | 65 | CA  | VAL X 445 | 22.670-117.433 | 1.714  | 1.00 79.28 |
| ATOM<br>C | 66 | C   | VAL X 445 | 22.300-118.109 | 0.461  | 1.00 85.99 |
| ATOM<br>O | 67 | O   | VAL X 445 | 21.151-118.093 | 0.079  | 1.00 86.88 |
| ATOM<br>C | 68 | CB  | VAL X 445 | 23.250-116.132 | 1.246  | 1.00 77.33 |
| ATOM<br>C | 69 | CG1 | VAL X 445 | 22.097-115.252 | 0.770  | 1.00 75.73 |
| ATOM<br>C | 70 | CG2 | VAL X 445 | 24.018-115.460 | 2.359  | 1.00 80.47 |
| ATOM<br>N | 71 | N   | ASP X 446 | 23.298-118.580 | -0.270 | 1.00 99.22 |

|             |    |     |     |   |     |                |        |            |
|-------------|----|-----|-----|---|-----|----------------|--------|------------|
| ATOM<br>C   | 72 | CA  | ASP | X | 446 | 23.028-119.412 | -1.444 | 1.00112.77 |
| ATOM<br>C   | 73 | C   | ASP | X | 446 | 24.169-120.440 | -1.784 | 1.00117.16 |
| ATOM<br>O   | 74 | O   | ASP | X | 446 | 25.364-120.280 | -1.418 | 1.00112.32 |
| ATOM<br>C   | 75 | CB  | ASP | X | 446 | 22.669-118.511 | -2.665 | 1.00119.28 |
| ATOM<br>C   | 76 | CG  | ASP | X | 446 | 21.501-119.061 | -3.510 | 1.00123.79 |
| ATOM<br>O   | 77 | OD1 | ASP | X | 446 | 20.643-119.758 | -2.923 | 1.00120.61 |
| ATOM<br>O1- | 78 | OD2 | ASP | X | 446 | 21.455-118.784 | -4.752 | 1.00125.70 |
| ATOM<br>N   | 79 | N   | LYS | X | 447 | 23.751-121.477 | -2.503 | 1.00114.73 |
| ATOM<br>C   | 80 | CA  | LYS | X | 447 | 24.620-122.523 | -3.005 | 1.00111.17 |
| ATOM<br>C   | 81 | C   | LYS | X | 447 | 24.708-122.371 | -4.528 | 1.00106.53 |
| ATOM<br>O   | 82 | O   | LYS | X | 447 | 23.661-122.323 | -5.216 | 1.00103.79 |
| ATOM<br>C   | 83 | CB  | LYS | X | 447 | 24.032-123.886 | -2.624 | 1.00116.92 |
| ATOM<br>C   | 84 | CG  | LYS | X | 447 | 22.673-124.236 | -3.271 | 1.00121.52 |
| ATOM<br>C   | 85 | CD  | LYS | X | 447 | 21.482-123.486 | -2.664 | 1.00117.36 |
| ATOM<br>C   | 86 | CE  | LYS | X | 447 | 20.286-123.489 | -3.594 | 1.00114.70 |
| ATOM<br>N1+ | 87 | NZ  | LYS | X | 447 | 19.849-124.882 | -3.891 | 1.00113.73 |
| ATOM<br>N   | 88 | N   | TYR | X | 448 | 25.917-122.155 | -5.048 | 1.00101.90 |
| ATOM<br>C   | 89 | CA  | TYR | X | 448 | 26.070-121.981 | -6.493 | 1.00105.86 |
| ATOM<br>C   | 90 | C   | TYR | X | 448 | 26.869-123.103 | -7.015 | 1.00108.88 |
| ATOM<br>O   | 91 | O   | TYR | X | 448 | 28.074-123.004 | -7.107 | 1.00108.33 |
| ATOM<br>C   | 92 | CB  | TYR | X | 448 | 26.664-120.620 | -6.887 | 1.00108.00 |
| ATOM<br>C   | 93 | CG  | TYR | X | 448 | 28.151-120.427 | -6.672 | 1.00113.43 |
| ATOM<br>C   | 94 | CD1 | TYR | X | 448 | 28.674-120.268 | -5.389 | 1.00117.22 |
| ATOM<br>C   | 95 | CD2 | TYR | X | 448 | 28.998-120.183 | -7.750 | 1.00119.67 |
| ATOM<br>C   | 96 | CE1 | TYR | X | 448 | 30.017-119.928 | -5.187 | 1.00123.52 |
| ATOM<br>C   | 97 | CE2 | TYR | X | 448 | 30.360-119.892 | -7.567 | 1.00123.34 |
| ATOM<br>C   | 98 | CZ  | TYR | X | 448 | 30.872-119.745 | -6.287 | 1.00126.85 |

|      |     |     |           |                |         |            |
|------|-----|-----|-----------|----------------|---------|------------|
| ATOM | 99  | OH  | TYR X 448 | 32.222-119.417 | -6.099  | 1.00129.71 |
| O    |     |     |           |                |         |            |
| ATOM | 100 | N   | LYS X 449 | 26.202-124.207 | -7.301  | 1.00115.71 |
| N    |     |     |           |                |         |            |
| ATOM | 101 | CA  | LYS X 449 | 26.945-125.373 | -7.648  | 1.00123.34 |
| C    |     |     |           |                |         |            |
| ATOM | 102 | C   | LYS X 449 | 27.918-124.908 | -8.669  | 1.00127.13 |
| C    |     |     |           |                |         |            |
| ATOM | 103 | O   | LYS X 449 | 27.556-124.389 | -9.708  | 1.00134.23 |
| O    |     |     |           |                |         |            |
| ATOM | 104 | CB  | LYS X 449 | 26.003-126.410 | -8.234  | 1.00132.90 |
| C    |     |     |           |                |         |            |
| ATOM | 105 | CG  | LYS X 449 | 26.607-127.789 | -8.384  | 1.00144.54 |
| C    |     |     |           |                |         |            |
| ATOM | 106 | CD  | LYS X 449 | 25.775-128.678 | -9.307  | 1.00149.44 |
| C    |     |     |           |                |         |            |
| ATOM | 107 | CE  | LYS X 449 | 24.960-129.730 | -8.565  | 1.00147.66 |
| C    |     |     |           |                |         |            |
| ATOM | 108 | NZ  | LYS X 449 | 23.563-129.318 | -8.258  | 1.00155.19 |
| N1+  |     |     |           |                |         |            |
| ATOM | 109 | N   | ASP X 450 | 29.178-125.111 | -8.341  | 1.00126.96 |
| N    |     |     |           |                |         |            |
| ATOM | 110 | CA  | ASP X 450 | 30.300-124.744 | -9.169  | 1.00134.03 |
| C    |     |     |           |                |         |            |
| ATOM | 111 | C   | ASP X 450 | 31.335-125.614 | -8.564  | 1.00151.03 |
| C    |     |     |           |                |         |            |
| ATOM | 112 | O   | ASP X 450 | 31.149-126.067 | -7.449  | 1.00164.42 |
| O    |     |     |           |                |         |            |
| ATOM | 113 | CB  | ASP X 450 | 30.682-123.297 | -8.949  | 1.00126.59 |
| C    |     |     |           |                |         |            |
| ATOM | 114 | CG  | ASP X 450 | 32.093-122.993 | -9.397  | 1.00125.40 |
| C    |     |     |           |                |         |            |
| ATOM | 115 | OD1 | ASP X 450 | 33.063-123.580 | -8.870  | 1.00129.34 |
| O    |     |     |           |                |         |            |
| ATOM | 116 | OD2 | ASP X 450 | 32.239-122.134 | -10.279 | 1.00127.93 |
| O1-  |     |     |           |                |         |            |
| ATOM | 117 | N   | MET X 451 | 32.424-125.887 | -9.279  | 1.00156.17 |
| N    |     |     |           |                |         |            |
| ATOM | 118 | CA  | MET X 451 | 33.508-126.738 | -8.776  | 1.00165.11 |
| C    |     |     |           |                |         |            |
| ATOM | 119 | C   | MET X 451 | 32.810-128.001 | -8.316  | 1.00172.89 |
| C    |     |     |           |                |         |            |
| ATOM | 120 | O   | MET X 451 | 31.851-128.422 | -8.969  | 1.00176.65 |
| O    |     |     |           |                |         |            |
| ATOM | 121 | CB  | MET X 451 | 34.372-126.059 | -7.686  | 1.00 0.00  |
| C    |     |     |           |                |         |            |
| ATOM | 122 | CG  | MET X 451 | 35.458-125.137 | -8.253  | 1.00 0.00  |
| C    |     |     |           |                |         |            |
| ATOM | 123 | SD  | MET X 451 | 36.746-125.986 | -9.217  | 1.00 0.00  |
| S    |     |     |           |                |         |            |
| ATOM | 124 | CE  | MET X 451 | 37.950-126.366 | -7.916  | 1.00 0.00  |
| C    |     |     |           |                |         |            |
| ATOM | 125 | N   | GLY X 452 | 33.215-128.560 | -7.182  | 1.00182.37 |
| N    |     |     |           |                |         |            |



|      |     |     |     |   |     |                |        |            |
|------|-----|-----|-----|---|-----|----------------|--------|------------|
| ATOM | 126 | CA  | GLY | X | 452 | 32.469-129.689 | -6.675 | 1.00176.65 |
| C    |     |     |     |   |     |                |        |            |
| ATOM | 127 | C   | GLY | X | 452 | 31.141-129.083 | -6.237 | 1.00168.62 |
| C    |     |     |     |   |     |                |        |            |
| ATOM | 128 | O   | GLY | X | 452 | 30.063-129.557 | -6.581 | 1.00159.05 |
| O    |     |     |     |   |     |                |        |            |
| ATOM | 129 | N   | THR | X | 453 | 31.249-127.994 | -5.477 | 1.00155.71 |
| N    |     |     |     |   |     |                |        |            |
| ATOM | 130 | CA  | THR | X | 453 | 30.108-127.242 | -4.969 | 1.00144.97 |
| C    |     |     |     |   |     |                |        |            |
| ATOM | 131 | C   | THR | X | 453 | 30.603-125.981 | -4.288 | 1.00138.49 |
| C    |     |     |     |   |     |                |        |            |
| ATOM | 132 | O   | THR | X | 453 | 31.787-125.865 | -3.995 | 1.00147.38 |
| O    |     |     |     |   |     |                |        |            |
| ATOM | 133 | CB  | THR | X | 453 | 29.307-128.047 | -3.941 | 1.00142.23 |
| C    |     |     |     |   |     |                |        |            |
| ATOM | 134 | OG1 | THR | X | 453 | 28.718-129.179 | -4.579 | 1.00147.93 |
| O    |     |     |     |   |     |                |        |            |
| ATOM | 135 | CG2 | THR | X | 453 | 28.207-127.204 | -3.354 | 1.00135.83 |
| C    |     |     |     |   |     |                |        |            |
| ATOM | 136 | N   | VAL | X | 454 | 29.706-125.047 | -4.004 | 1.00128.99 |
| N    |     |     |     |   |     |                |        |            |
| ATOM | 137 | CA  | VAL | X | 454 | 30.132-123.837 | -3.260 | 1.00117.61 |
| C    |     |     |     |   |     |                |        |            |
| ATOM | 138 | C   | VAL | X | 454 | 28.913-123.112 | -2.723 | 1.00109.09 |
| C    |     |     |     |   |     |                |        |            |
| ATOM | 139 | O   | VAL | X | 454 | 27.803-123.169 | -3.309 | 1.00100.27 |
| O    |     |     |     |   |     |                |        |            |
| ATOM | 140 | CB  | VAL | X | 454 | 31.002-122.838 | -4.118 | 1.00115.23 |
| C    |     |     |     |   |     |                |        |            |
| ATOM | 141 | CG1 | VAL | X | 454 | 31.919-121.956 | -3.262 | 1.00107.25 |
| C    |     |     |     |   |     |                |        |            |
| ATOM | 142 | CG2 | VAL | X | 454 | 31.876-123.597 | -5.085 | 1.00127.79 |
| C    |     |     |     |   |     |                |        |            |
| ATOM | 143 | N   | VAL | X | 455 | 29.189-122.361 | -1.654 | 1.00102.23 |
| N    |     |     |     |   |     |                |        |            |
| ATOM | 144 | CA  | VAL | X | 455 | 28.211-121.841 | -0.763 | 1.00 92.29 |
| C    |     |     |     |   |     |                |        |            |
| ATOM | 145 | C   | VAL | X | 455 | 28.635-120.465 | -0.262 | 1.00 86.21 |
| C    |     |     |     |   |     |                |        |            |
| ATOM | 146 | O   | VAL | X | 455 | 29.794-120.221 | 0.055  | 1.00 80.14 |
| O    |     |     |     |   |     |                |        |            |
| ATOM | 147 | CB  | VAL | X | 455 | 28.028-122.837 | 0.382  | 1.00 94.14 |
| C    |     |     |     |   |     |                |        |            |
| ATOM | 148 | CG1 | VAL | X | 455 | 28.004-122.161 | 1.737  | 1.00 96.17 |
| C    |     |     |     |   |     |                |        |            |
| ATOM | 149 | CG2 | VAL | X | 455 | 26.759-123.645 | 0.159  | 1.00 97.29 |
| C    |     |     |     |   |     |                |        |            |
| ATOM | 150 | N   | LEU | X | 456 | 27.643-119.614 | -0.087 | 1.00 86.89 |
| N    |     |     |     |   |     |                |        |            |
| ATOM | 151 | CA  | LEU | X | 456 | 27.835-118.217 | 0.312  | 1.00 91.63 |
| C    |     |     |     |   |     |                |        |            |
| ATOM | 152 | C   | LEU | X | 456 | 27.322-117.849 | 1.720  | 1.00 91.85 |
| C    |     |     |     |   |     |                |        |            |

|             |     |     |           |                |        |      |        |
|-------------|-----|-----|-----------|----------------|--------|------|--------|
| ATOM<br>O   | 153 | O   | LEU X 456 | 26.238-118.267 | 2.120  | 1.00 | 88.44  |
| ATOM<br>C   | 154 | CB  | LEU X 456 | 27.045-117.375 | -0.655 | 1.00 | 92.91  |
| ATOM<br>C   | 155 | CG  | LEU X 456 | 27.806-117.003 | -1.893 | 1.00 | 94.27  |
| ATOM<br>C   | 156 | CD1 | LEU X 456 | 27.089-117.543 | -3.125 | 1.00 | 90.55  |
| ATOM<br>C   | 157 | CD2 | LEU X 456 | 27.962-115.472 | -1.888 | 1.00 | 96.13  |
| ATOM<br>N   | 158 | N   | GLY X 457 | 27.938-116.867 | 2.344  | 1.00 | 95.66  |
| ATOM<br>C   | 159 | CA  | GLY X 457 | 27.279-116.256 | 3.465  | 1.00 | 106.67 |
| ATOM<br>C   | 160 | C   | GLY X 457 | 28.054-115.172 | 4.134  | 1.00 | 123.67 |
| ATOM<br>O   | 161 | O   | GLY X 457 | 29.053-114.698 | 3.597  | 1.00 | 127.90 |
| ATOM<br>N   | 162 | N   | LYS X 458 | 27.494-114.686 | 5.246  | 1.00 | 146.49 |
| ATOM<br>C   | 163 | CA  | LYS X 458 | 28.273-114.048 | 6.310  | 1.00 | 148.62 |
| ATOM<br>C   | 164 | C   | LYS X 458 | 28.438-114.994 | 7.454  | 1.00 | 141.55 |
| ATOM<br>O   | 165 | O   | LYS X 458 | 27.469-115.627 | 7.889  | 1.00 | 129.74 |
| ATOM<br>C   | 166 | CB  | LYS X 458 | 27.586-112.796 | 6.847  | 1.00 | 156.80 |
| ATOM<br>C   | 167 | CG  | LYS X 458 | 28.391-112.115 | 7.951  | 1.00 | 156.30 |
| ATOM<br>C   | 168 | CD  | LYS X 458 | 28.052-110.635 | 8.091  | 1.00 | 171.29 |
| ATOM<br>C   | 169 | CE  | LYS X 458 | 28.587-109.805 | 6.916  | 1.00 | 179.28 |
| ATOM<br>N1+ | 170 | NZ  | LYS X 458 | 28.444-108.323 | 7.081  | 1.00 | 185.31 |
| ATOM<br>N   | 171 | N   | LEU X 459 | 29.625-114.935 | 8.049  | 1.00 | 139.88 |
| ATOM<br>C   | 172 | CA  | LEU X 459 | 30.100-115.936 | 9.000  | 1.00 | 133.83 |
| ATOM<br>C   | 173 | C   | LEU X 459 | 29.948-115.419 | 10.429 | 1.00 | 117.69 |
| ATOM<br>O   | 174 | O   | LEU X 459 | 30.750-114.588 | 10.871 | 1.00 | 106.26 |
| ATOM<br>C   | 175 | CB  | LEU X 459 | 31.575-116.230 | 8.690  | 1.00 | 136.86 |
| ATOM<br>C   | 176 | CG  | LEU X 459 | 32.338-117.379 | 9.367  | 1.00 | 140.01 |
| ATOM<br>C   | 177 | CD1 | LEU X 459 | 33.435-116.841 | 10.272 | 1.00 | 141.68 |
| ATOM<br>C   | 178 | CD2 | LEU X 459 | 31.437-118.343 | 10.117 | 1.00 | 142.93 |
| ATOM<br>N   | 179 | N   | GLU X 460 | 28.914-115.894 | 11.130 | 1.00 | 110.26 |

|      |     |     |     |   |     |                |        |            |
|------|-----|-----|-----|---|-----|----------------|--------|------------|
| ATOM | 180 | CA  | GLU | X | 460 | 28.430-115.216 | 12.355 | 1.00122.97 |
| C    |     |     |     |   |     |                |        |            |
| ATOM | 181 | C   | GLU | X | 460 | 28.911-115.846 | 13.706 | 1.00123.03 |
| C    |     |     |     |   |     |                |        |            |
| ATOM | 182 | O   | GLU | X | 460 | 29.132-115.126 | 14.665 | 1.00116.54 |
| O    |     |     |     |   |     |                |        |            |
| ATOM | 183 | CB  | GLU | X | 460 | 26.890-115.037 | 12.363 | 1.00123.54 |
| C    |     |     |     |   |     |                |        |            |
| ATOM | 184 | CG  | GLU | X | 460 | 26.238-114.708 | 10.998 | 1.00126.05 |
| C    |     |     |     |   |     |                |        |            |
| ATOM | 185 | CD  | GLU | X | 460 | 25.993-113.205 | 10.698 | 1.00133.14 |
| C    |     |     |     |   |     |                |        |            |
| ATOM | 186 | OE1 | GLU | X | 460 | 26.020-112.340 | 11.617 | 1.00132.84 |
| O    |     |     |     |   |     |                |        |            |
| ATOM | 187 | OE2 | GLU | X | 460 | 25.686-112.893 | 9.520  | 1.00133.43 |
| O1-  |     |     |     |   |     |                |        |            |
| ATOM | 188 | N   | SER | X | 461 | 29.139-117.154 | 13.760 | 1.00122.00 |
| N    |     |     |     |   |     |                |        |            |
| ATOM | 189 | CA  | SER | X | 461 | 29.863-117.733 | 14.902 | 1.00127.35 |
| C    |     |     |     |   |     |                |        |            |
| ATOM | 190 | C   | SER | X | 461 | 31.226-118.268 | 14.465 | 1.00128.44 |
| C    |     |     |     |   |     |                |        |            |
| ATOM | 191 | O   | SER | X | 461 | 31.311-119.244 | 13.729 | 1.00124.89 |
| O    |     |     |     |   |     |                |        |            |
| ATOM | 192 | CB  | SER | X | 461 | 29.069-118.851 | 15.598 | 1.00139.76 |
| C    |     |     |     |   |     |                |        |            |
| ATOM | 193 | OG  | SER | X | 461 | 29.766-119.392 | 16.739 | 1.00172.41 |
| O    |     |     |     |   |     |                |        |            |
| ATOM | 194 | N   | GLY | X | 462 | 32.290-117.643 | 14.957 | 1.00135.06 |
| N    |     |     |     |   |     |                |        |            |
| ATOM | 195 | CA  | GLY | X | 462 | 33.586-118.320 | 15.118 | 1.00135.78 |
| C    |     |     |     |   |     |                |        |            |
| ATOM | 196 | C   | GLY | X | 462 | 34.506-118.270 | 13.906 | 1.00129.68 |
| C    |     |     |     |   |     |                |        |            |
| ATOM | 197 | O   | GLY | X | 462 | 34.286-117.505 | 12.974 | 1.00113.01 |
| O    |     |     |     |   |     |                |        |            |
| ATOM | 198 | N   | SER | X | 463 | 35.600-119.025 | 13.993 | 1.00134.56 |
| N    |     |     |     |   |     |                |        |            |
| ATOM | 199 | CA  | SER | X | 463 | 36.640-119.022 | 12.979 | 1.00134.32 |
| C    |     |     |     |   |     |                |        |            |
| ATOM | 200 | C   | SER | X | 463 | 36.602-120.348 | 12.248 | 1.00131.05 |
| C    |     |     |     |   |     |                |        |            |
| ATOM | 201 | O   | SER | X | 463 | 36.167-121.366 | 12.785 | 1.00112.49 |
| O    |     |     |     |   |     |                |        |            |
| ATOM | 202 | CB  | SER | X | 463 | 38.029-118.790 | 13.609 | 1.00139.08 |
| C    |     |     |     |   |     |                |        |            |
| ATOM | 203 | OG  | SER | X | 463 | 38.972-118.359 | 12.644 | 1.00139.89 |
| O    |     |     |     |   |     |                |        |            |
| ATOM | 204 | N   | ILE | X | 464 | 37.064-120.324 | 11.013 | 1.00144.70 |
| N    |     |     |     |   |     |                |        |            |
| ATOM | 205 | CA  | ILE | X | 464 | 36.833-121.435 | 10.115 | 1.00156.54 |
| C    |     |     |     |   |     |                |        |            |
| ATOM | 206 | C   | ILE | X | 464 | 38.095-121.831 | 9.325  | 1.00164.84 |
| C    |     |     |     |   |     |                |        |            |

|             |     |     |           |                |        |            |
|-------------|-----|-----|-----------|----------------|--------|------------|
| ATOM<br>O   | 207 | O   | ILE X 464 | 38.563-121.102 | 8.435  | 1.00137.71 |
| ATOM<br>C   | 208 | CB  | ILE X 464 | 35.626-121.157 | 9.206  | 1.00150.40 |
| ATOM<br>C   | 209 | CG1 | ILE X 464 | 35.310-122.385 | 8.350  | 1.00144.69 |
| ATOM<br>C   | 210 | CG2 | ILE X 464 | 35.843-119.893 | 8.387  | 1.00148.98 |
| ATOM<br>C   | 211 | CD1 | ILE X 464 | 33.826-122.646 | 8.264  | 1.00142.70 |
| ATOM<br>N   | 212 | N   | CYS X 465 | 38.671-122.968 | 9.732  | 1.00184.98 |
| ATOM<br>C   | 213 | CA  | CYS X 465 | 39.991-123.399 | 9.280  | 1.00186.61 |
| ATOM<br>C   | 214 | C   | CYS X 465 | 39.774-124.171 | 7.986  | 1.00169.73 |
| ATOM<br>O   | 215 | O   | CYS X 465 | 38.679-124.725 | 7.794  | 1.00151.72 |
| ATOM<br>C   | 216 | CB  | CYS X 465 | 40.675-124.305 | 10.339 | 1.00204.35 |
| ATOM<br>S   | 217 | SG  | CYS X 465 | 40.805-123.662 | 12.061 | 1.00208.64 |
| ATOM<br>N   | 218 | N   | LYS X 466 | 40.764-124.108 | 7.069  | 1.00162.08 |
| ATOM<br>C   | 219 | CA  | LYS X 466 | 40.693-124.790 | 5.738  | 1.00149.77 |
| ATOM<br>C   | 220 | C   | LYS X 466 | 40.611-126.299 | 5.947  | 1.00157.70 |
| ATOM<br>O   | 221 | O   | LYS X 466 | 41.257-126.832 | 6.854  | 1.00171.52 |
| ATOM<br>C   | 222 | CB  | LYS X 466 | 41.946-124.458 | 4.874  | 1.00 0.00  |
| ATOM<br>C   | 223 | CG  | LYS X 466 | 41.881-125.015 | 3.444  | 1.00 0.00  |
| ATOM<br>C   | 224 | CD  | LYS X 466 | 43.089-124.555 | 2.617  | 1.00 0.00  |
| ATOM<br>C   | 225 | CE  | LYS X 466 | 43.016-125.116 | 1.195  | 1.00 0.00  |
| ATOM<br>N1+ | 226 | NZ  | LYS X 466 | 44.168-124.684 | 0.387  | 1.00 0.00  |
| ATOM<br>N   | 227 | N   | GLY X 467 | 39.729-126.959 | 5.194  | 1.00157.71 |
| ATOM<br>C   | 228 | CA  | GLY X 467 | 39.440-128.399 | 5.374  | 1.00158.56 |
| ATOM<br>C   | 229 | C   | GLY X 467 | 38.815-128.902 | 6.693  | 1.00162.89 |
| ATOM<br>O   | 230 | O   | GLY X 467 | 38.783-130.121 | 6.921  | 1.00175.32 |
| ATOM<br>N   | 231 | N   | GLN X 468 | 38.265-127.992 | 7.523  | 1.00156.06 |
| ATOM<br>C   | 232 | CA  | GLN X 468 | 37.798-128.308 | 8.915  | 1.00142.87 |
| ATOM<br>C   | 233 | C   | GLN X 468 | 36.434-129.008 | 8.930  | 1.00141.24 |

|           |     |     |           |                |        |            |
|-----------|-----|-----|-----------|----------------|--------|------------|
| ATOM<br>O | 234 | O   | GLN X 468 | 35.428-128.336 | 8.859  | 1.00149.43 |
| ATOM<br>C | 235 | CB  | GLN X 468 | 37.744-126.996 | 9.721  | 1.00 0.00  |
| ATOM<br>C | 236 | CG  | GLN X 468 | 37.492-127.236 | 11.220 | 1.00 0.00  |
| ATOM<br>C | 237 | CD  | GLN X 468 | 37.141-125.946 | 11.968 | 1.00 0.00  |
| ATOM<br>O | 238 | OE1 | GLN X 468 | 36.284-125.182 | 11.527 | 1.00 0.00  |
| ATOM<br>N | 239 | NE2 | GLN X 468 | 37.772-125.714 | 13.122 | 1.00 0.00  |
| ATOM<br>N | 240 | N   | GLN X 469 | 36.386-130.339 | 9.069  | 1.00140.87 |
| ATOM<br>C | 241 | CA  | GLN X 469 | 35.097-131.079 | 8.972  | 1.00138.58 |
| ATOM<br>C | 242 | C   | GLN X 469 | 33.990-130.350 | 9.704  | 1.00127.70 |
| ATOM<br>O | 243 | O   | GLN X 469 | 34.237-129.813 | 10.779 | 1.00132.85 |
| ATOM<br>C | 244 | CB  | GLN X 469 | 35.226-132.472 | 9.576  | 1.00148.16 |
| ATOM<br>C | 245 | CG  | GLN X 469 | 35.814-133.511 | 8.627  | 1.00158.50 |
| ATOM<br>C | 246 | CD  | GLN X 469 | 34.750-134.309 | 7.898  | 1.00164.51 |
| ATOM<br>O | 247 | OE1 | GLN X 469 | 34.799-134.457 | 6.662  | 1.00154.66 |
| ATOM<br>N | 248 | NE2 | GLN X 469 | 33.773-134.835 | 8.657  | 1.00168.14 |
| ATOM<br>N | 249 | N   | LEU X 470 | 32.786-130.327 | 9.113  | 1.00118.22 |
| ATOM<br>C | 250 | CA  | LEU X 470 | 31.633-129.580 | 9.661  | 1.00115.10 |
| ATOM<br>C | 251 | C   | LEU X 470 | 30.353-130.297 | 9.380  | 1.00116.71 |
| ATOM<br>O | 252 | O   | LEU X 470 | 30.342-131.354 | 8.735  | 1.00123.90 |
| ATOM<br>C | 253 | CB  | LEU X 470 | 31.516-128.180 | 9.047  | 1.00113.80 |
| ATOM<br>C | 254 | CG  | LEU X 470 | 32.671-127.212 | 9.270  | 1.00121.47 |
| ATOM<br>C | 255 | CD1 | LEU X 470 | 32.394-125.899 | 8.559  | 1.00116.65 |
| ATOM<br>C | 256 | CD2 | LEU X 470 | 32.987-126.962 | 10.754 | 1.00127.98 |
| ATOM<br>N | 257 | N   | VAL X 471 | 29.258-129.692 | 9.818  | 1.00117.86 |
| ATOM<br>C | 258 | CA  | VAL X 471 | 27.935-130.216 | 9.526  | 1.00129.28 |
| ATOM<br>C | 259 | C   | VAL X 471 | 27.040-129.075 | 9.136  | 1.00143.57 |
| ATOM<br>O | 260 | O   | VAL X 471 | 27.377-127.906 | 9.354  | 1.00149.72 |

|           |     |     |           |                |        |            |
|-----------|-----|-----|-----------|----------------|--------|------------|
| ATOM<br>C | 261 | CB  | VAL X 471 | 27.330-130.936 | 10.741 | 1.00130.13 |
| ATOM<br>C | 262 | CG1 | VAL X 471 | 25.891-131.393 | 10.483 | 1.00121.98 |
| ATOM<br>C | 263 | CG2 | VAL X 471 | 28.205-132.126 | 11.121 | 1.00139.40 |
| ATOM<br>N | 264 | N   | MET X 472 | 25.915-129.423 | 8.517  | 1.00155.12 |
| ATOM<br>C | 265 | CA  | MET X 472 | 25.013-128.444 | 7.956  | 1.00149.25 |
| ATOM<br>C | 266 | C   | MET X 472 | 23.562-128.879 | 8.069  | 1.00138.24 |
| ATOM<br>O | 267 | O   | MET X 472 | 23.171-129.974 | 7.626  | 1.00134.74 |
| ATOM<br>C | 268 | CB  | MET X 472 | 25.369-128.237 | 6.508  | 1.00146.72 |
| ATOM<br>C | 269 | CG  | MET X 472 | 24.769-126.990 | 5.917  | 1.00140.85 |
| ATOM<br>S | 270 | SD  | MET X 472 | 24.717-127.197 | 4.168  | 1.00130.30 |
| ATOM<br>C | 271 | CE  | MET X 472 | 23.517-128.548 | 4.065  | 1.00124.57 |
| ATOM<br>N | 272 | N   | MET X 473 | 22.760-127.999 | 8.644  | 1.00119.73 |
| ATOM<br>C | 273 | CA  | MET X 473 | 21.743-128.442 | 9.506  | 1.00116.02 |
| ATOM<br>C | 274 | C   | MET X 473 | 20.483-128.664 | 8.710  | 1.00102.33 |
| ATOM<br>O | 275 | O   | MET X 473 | 20.532-128.775 | 7.516  | 1.00 91.19 |
| ATOM<br>C | 276 | CB  | MET X 473 | 21.576-127.461 | 10.669 | 1.00130.74 |
| ATOM<br>C | 277 | CG  | MET X 473 | 21.410-128.134 | 12.039 | 1.00148.41 |
| ATOM<br>S | 278 | SD  | MET X 473 | 21.995-129.861 | 12.200 | 1.00164.57 |
| ATOM<br>C | 279 | CE  | MET X 473 | 20.711-130.534 | 13.264 | 1.00160.06 |
| ATOM<br>N | 280 | N   | PRO X 474 | 19.343-128.601 | 9.370  | 1.00104.20 |
| ATOM<br>C | 281 | CA  | PRO X 474 | 18.426-129.670 | 9.799  | 1.00111.47 |
| ATOM<br>C | 282 | C   | PRO X 474 | 18.786-131.121 | 9.393  | 1.00126.79 |
| ATOM<br>O | 283 | O   | PRO X 474 | 18.294-132.087 | 10.020 | 1.00127.86 |
| ATOM<br>C | 284 | CB  | PRO X 474 | 17.105-129.248 | 9.172  | 1.00109.31 |
| ATOM<br>C | 285 | CG  | PRO X 474 | 17.158-127.773 | 9.188  | 1.00107.00 |
| ATOM<br>C | 286 | CD  | PRO X 474 | 18.605-127.401 | 8.962  | 1.00104.53 |
| ATOM<br>N | 287 | N   | ASN X 475 | 19.642-131.278 | 8.383  | 1.00136.21 |

|             |     |     |           |                |        |            |
|-------------|-----|-----|-----------|----------------|--------|------------|
| ATOM<br>C   | 288 | CA  | ASN X 475 | 19.844-132.575 | 7.740  | 1.00147.83 |
| ATOM<br>C   | 289 | C   | ASN X 475 | 21.075-133.350 | 8.250  | 1.00140.16 |
| ATOM<br>O   | 290 | O   | ASN X 475 | 21.387-134.448 | 7.770  | 1.00137.83 |
| ATOM<br>C   | 291 | CB  | ASN X 475 | 19.957-132.357 | 6.237  | 1.00164.09 |
| ATOM<br>C   | 292 | CG  | ASN X 475 | 18.796-131.548 | 5.682  | 1.00175.02 |
| ATOM<br>O   | 293 | OD1 | ASN X 475 | 17.753-131.415 | 6.324  | 1.00171.21 |
| ATOM<br>N   | 294 | ND2 | ASN X 475 | 18.976-130.996 | 4.488  | 1.00193.85 |
| ATOM<br>N   | 295 | N   | LYS X 476 | 21.784-132.749 | 9.199  | 1.00130.11 |
| ATOM<br>C   | 296 | CA  | LYS X 476 | 22.932-133.364 | 9.822  | 1.00123.41 |
| ATOM<br>C   | 297 | C   | LYS X 476 | 23.903-133.809 | 8.767  | 1.00121.97 |
| ATOM<br>O   | 298 | O   | LYS X 476 | 24.449-134.874 | 8.904  | 1.00137.46 |
| ATOM<br>C   | 299 | CB  | LYS X 476 | 22.528-134.622 | 10.632 | 1.00126.75 |
| ATOM<br>C   | 300 | CG  | LYS X 476 | 22.194-134.414 | 12.095 | 1.00130.82 |
| ATOM<br>C   | 301 | CD  | LYS X 476 | 21.098-133.389 | 12.280 | 1.00140.17 |
| ATOM<br>C   | 302 | CE  | LYS X 476 | 19.878-133.581 | 11.369 | 1.00145.47 |
| ATOM<br>N1+ | 303 | NZ  | LYS X 476 | 19.008-134.747 | 11.670 | 1.00154.45 |
| ATOM<br>N   | 304 | N   | HIE X 477 | 24.057-133.091 | 7.663  | 1.00121.90 |
| ATOM<br>C   | 305 | CA  | HIE X 477 | 25.040-133.541 | 6.673  | 1.00127.82 |
| ATOM<br>C   | 306 | C   | HIE X 477 | 26.451-133.133 | 7.065  | 1.00130.04 |
| ATOM<br>O   | 307 | O   | HIE X 477 | 26.748-131.940 | 7.215  | 1.00122.89 |
| ATOM<br>C   | 308 | CB  | HIE X 477 | 24.720-133.066 | 5.257  | 1.00129.71 |
| ATOM<br>C   | 309 | CG  | HIE X 477 | 24.020-134.093 | 4.445  | 1.00131.50 |
| ATOM<br>N   | 310 | ND1 | HIE X 477 | 24.700-135.060 | 3.743  | 1.00138.49 |
| ATOM<br>C   | 311 | CD2 | HIE X 477 | 22.702-134.391 | 4.328  | 1.00133.69 |
| ATOM<br>C   | 312 | CE1 | HIE X 477 | 23.829-135.886 | 3.188  | 1.00150.40 |
| ATOM<br>N   | 313 | NE2 | HIE X 477 | 22.609-135.491 | 3.514  | 1.00146.73 |
| ATOM<br>N   | 314 | N   | ASN X 478 | 27.309-134.141 | 7.240  | 1.00130.74 |

|      |     |     |           |                |       |            |
|------|-----|-----|-----------|----------------|-------|------------|
| ATOM | 315 | CA  | ASN X 478 | 28.751-133.940 | 7.263 | 1.00126.80 |
| C    |     |     |           |                |       |            |
| ATOM | 316 | C   | ASN X 478 | 29.195-133.215 | 6.035 | 1.00121.94 |
| C    |     |     |           |                |       |            |
| ATOM | 317 | O   | ASN X 478 | 28.532-133.277 | 4.991 | 1.00122.49 |
| O    |     |     |           |                |       |            |
| ATOM | 318 | CB  | ASN X 478 | 29.498-135.269 | 7.324 | 1.00129.31 |
| C    |     |     |           |                |       |            |
| ATOM | 319 | CG  | ASN X 478 | 29.707-135.746 | 8.717 | 1.00133.59 |
| C    |     |     |           |                |       |            |
| ATOM | 320 | OD1 | ASN X 478 | 29.206-135.156 | 9.693 | 1.00134.82 |
| O    |     |     |           |                |       |            |
| ATOM | 321 | ND2 | ASN X 478 | 30.448-136.830 | 8.835 | 1.00137.77 |
| N    |     |     |           |                |       |            |
| ATOM | 322 | N   | VAL X 479 | 30.372-132.622 | 6.133 | 1.00115.79 |
| N    |     |     |           |                |       |            |
| ATOM | 323 | CA  | VAL X 479 | 30.946-131.912 | 5.031 | 1.00114.40 |
| C    |     |     |           |                |       |            |
| ATOM | 324 | C   | VAL X 479 | 32.299-131.410 | 5.452 | 1.00113.03 |
| C    |     |     |           |                |       |            |
| ATOM | 325 | O   | VAL X 479 | 32.455-130.961 | 6.575 | 1.00122.67 |
| O    |     |     |           |                |       |            |
| ATOM | 326 | CB  | VAL X 479 | 30.055-130.724 | 4.638 | 1.00119.63 |
| C    |     |     |           |                |       |            |
| ATOM | 327 | CG1 | VAL X 479 | 30.051-129.644 | 5.705 | 1.00122.57 |
| C    |     |     |           |                |       |            |
| ATOM | 328 | CG2 | VAL X 479 | 30.504-130.153 | 3.320 | 1.00130.78 |
| C    |     |     |           |                |       |            |
| ATOM | 329 | N   | GLU X 480 | 33.300-131.534 | 4.596 | 1.00114.21 |
| N    |     |     |           |                |       |            |
| ATOM | 330 | CA  | GLU X 480 | 34.612-130.935 | 4.902 | 1.00120.07 |
| C    |     |     |           |                |       |            |
| ATOM | 331 | C   | GLU X 480 | 34.724-129.678 | 4.068 | 1.00121.46 |
| C    |     |     |           |                |       |            |
| ATOM | 332 | O   | GLU X 480 | 34.264-129.643 | 2.907 | 1.00112.58 |
| O    |     |     |           |                |       |            |
| ATOM | 333 | CB  | GLU X 480 | 35.783-131.926 | 4.563 | 1.00 0.00  |
| C    |     |     |           |                |       |            |
| ATOM | 334 | CG  | GLU X 480 | 37.118-131.601 | 5.239 | 1.00 0.00  |
| C    |     |     |           |                |       |            |
| ATOM | 335 | CD  | GLU X 480 | 38.061-132.799 | 5.111 | 1.00 0.00  |
| C    |     |     |           |                |       |            |
| ATOM | 336 | OE1 | GLU X 480 | 38.322-133.341 | 4.040 | 1.00 0.00  |
| O    |     |     |           |                |       |            |
| ATOM | 337 | OE2 | GLU X 480 | 38.561-133.236 | 6.304 | 1.00 0.00  |
| O1-  |     |     |           |                |       |            |
| ATOM | 338 | N   | VAL X 481 | 35.256-128.619 | 4.678 | 1.00129.99 |
| N    |     |     |           |                |       |            |
| ATOM | 339 | CA  | VAL X 481 | 35.724-127.477 | 3.902 | 1.00142.91 |
| C    |     |     |           |                |       |            |
| ATOM | 340 | C   | VAL X 481 | 36.767-128.002 | 2.964 | 1.00149.71 |
| C    |     |     |           |                |       |            |
| ATOM | 341 | O   | VAL X 481 | 37.681-128.725 | 3.395 | 1.00148.51 |
| O    |     |     |           |                |       |            |



|      |     |     |     |   |     |                |        |            |
|------|-----|-----|-----|---|-----|----------------|--------|------------|
| ATOM | 342 | CB  | VAL | X | 481 | 36.417-126.384 | 4.743  | 1.00146.02 |
| C    |     |     |     |   |     |                |        |            |
| ATOM | 343 | CG1 | VAL | X | 481 | 37.049-125.336 | 3.824  | 1.00144.57 |
| C    |     |     |     |   |     |                |        |            |
| ATOM | 344 | CG2 | VAL | X | 481 | 35.439-125.718 | 5.697  | 1.00149.40 |
| C    |     |     |     |   |     |                |        |            |
| ATOM | 345 | N   | LEU | X | 482 | 36.589-127.701 | 1.677  | 1.00146.43 |
| N    |     |     |     |   |     |                |        |            |
| ATOM | 346 | CA  | LEU | X | 482 | 37.705-127.661 | 0.750  | 1.00142.94 |
| C    |     |     |     |   |     |                |        |            |
| ATOM | 347 | C   | LEU | X | 482 | 38.258-126.228 | 0.698  | 1.00144.82 |
| C    |     |     |     |   |     |                |        |            |
| ATOM | 348 | O   | LEU | X | 482 | 39.367-125.963 | 1.183  | 1.00152.59 |
| O    |     |     |     |   |     |                |        |            |
| ATOM | 349 | CB  | LEU | X | 482 | 37.282-128.136 | -0.649 | 1.00139.29 |
| C    |     |     |     |   |     |                |        |            |
| ATOM | 350 | CG  | LEU | X | 482 | 36.285-129.293 | -0.801 | 1.00133.46 |
| C    |     |     |     |   |     |                |        |            |
| ATOM | 351 | CD1 | LEU | X | 482 | 36.358-129.818 | -2.232 | 1.00130.70 |
| C    |     |     |     |   |     |                |        |            |
| ATOM | 352 | CD2 | LEU | X | 482 | 36.525-130.413 | 0.195  | 1.00131.77 |
| C    |     |     |     |   |     |                |        |            |
| ATOM | 353 | N   | GLY | X | 483 | 37.434-125.296 | 0.213  | 1.00139.90 |
| N    |     |     |     |   |     |                |        |            |
| ATOM | 354 | CA  | GLY | X | 483 | 37.931-124.049 | -0.375 | 1.00132.05 |
| C    |     |     |     |   |     |                |        |            |
| ATOM | 355 | C   | GLY | X | 483 | 37.236-122.805 | 0.147  | 1.00120.37 |
| C    |     |     |     |   |     |                |        |            |
| ATOM | 356 | O   | GLY | X | 483 | 36.009-122.671 | 0.057  | 1.00110.80 |
| O    |     |     |     |   |     |                |        |            |
| ATOM | 357 | N   | ILE | X | 484 | 38.042-121.846 | 0.573  | 1.00111.72 |
| N    |     |     |     |   |     |                |        |            |
| ATOM | 358 | CA  | ILE | X | 484 | 37.536-120.684 | 1.225  | 1.00110.15 |
| C    |     |     |     |   |     |                |        |            |
| ATOM | 359 | C   | ILE | X | 484 | 37.987-119.451 | 0.502  | 1.00112.85 |
| C    |     |     |     |   |     |                |        |            |
| ATOM | 360 | O   | ILE | X | 484 | 39.095-118.957 | 0.725  | 1.00108.86 |
| O    |     |     |     |   |     |                |        |            |
| ATOM | 361 | CB  | ILE | X | 484 | 38.012-120.649 | 2.659  | 1.00111.31 |
| C    |     |     |     |   |     |                |        |            |
| ATOM | 362 | CG1 | ILE | X | 484 | 37.532-121.928 | 3.346  | 1.00111.35 |
| C    |     |     |     |   |     |                |        |            |
| ATOM | 363 | CG2 | ILE | X | 484 | 37.515-119.373 | 3.341  | 1.00110.28 |
| C    |     |     |     |   |     |                |        |            |
| ATOM | 364 | CD1 | ILE | X | 484 | 37.790-121.970 | 4.829  | 1.00118.09 |
| C    |     |     |     |   |     |                |        |            |
| ATOM | 365 | N   | LEU | X | 485 | 37.109-118.969 | -0.379 | 1.00126.14 |
| N    |     |     |     |   |     |                |        |            |
| ATOM | 366 | CA  | LEU | X | 485 | 37.428-117.887 | -1.343 | 1.00136.92 |
| C    |     |     |     |   |     |                |        |            |
| ATOM | 367 | C   | LEU | X | 485 | 36.967-116.526 | -0.764 | 1.00130.22 |
| C    |     |     |     |   |     |                |        |            |
| ATOM | 368 | O   | LEU | X | 485 | 36.569-115.646 | -1.541 | 1.00118.28 |
| O    |     |     |     |   |     |                |        |            |

|             |     |     |           |                |        |            |
|-------------|-----|-----|-----------|----------------|--------|------------|
| ATOM<br>C   | 369 | CB  | LEU X 485 | 36.741-118.110 | -2.777 | 1.00142.48 |
| ATOM<br>C   | 370 | CG  | LEU X 485 | 36.691-119.402 | -3.719 | 1.00140.58 |
| ATOM<br>C   | 371 | CD1 | LEU X 485 | 36.053-120.655 | -3.095 | 1.00135.63 |
| ATOM<br>C   | 372 | CD2 | LEU X 485 | 35.987-119.135 | -5.066 | 1.00131.25 |
| ATOM<br>N   | 373 | N   | SER X 486 | 37.144-116.362 | 0.538  | 1.00125.79 |
| ATOM<br>C   | 374 | CA  | SER X 486 | 36.655-115.201 | 1.235  | 1.00123.86 |
| ATOM<br>C   | 375 | C   | SER X 486 | 36.968-113.950 | 0.489  | 1.00136.04 |
| ATOM<br>O   | 376 | O   | SER X 486 | 38.091-113.684 | 0.090  | 1.00134.71 |
| ATOM<br>C   | 377 | CB  | SER X 486 | 37.318-115.118 | 2.609  | 1.00115.08 |
| ATOM<br>O   | 378 | OG  | SER X 486 | 37.286-113.807 | 3.151  | 1.00107.25 |
| ATOM<br>N   | 379 | N   | ASP X 487 | 35.890-113.210 | 0.277  | 1.00146.63 |
| ATOM<br>C   | 380 | CA  | ASP X 487 | 35.922-111.951 | -0.404 | 1.00147.13 |
| ATOM<br>C   | 381 | C   | ASP X 487 | 36.474-112.266 | -1.765 | 1.00153.58 |
| ATOM<br>O   | 382 | O   | ASP X 487 | 36.316-113.376 | -2.257 | 1.00141.52 |
| ATOM<br>C   | 383 | CB  | ASP X 487 | 36.837-111.008 | 0.344  | 1.00150.30 |
| ATOM<br>C   | 384 | CG  | ASP X 487 | 36.393-109.583 | 0.239  | 1.00156.61 |
| ATOM<br>O   | 385 | OD1 | ASP X 487 | 36.411-109.046 | -0.887 | 1.00153.01 |
| ATOM<br>O1- | 386 | OD2 | ASP X 487 | 36.008-109.007 | 1.276  | 1.00159.09 |
| ATOM<br>N   | 387 | N   | ASP X 488 | 37.159-111.309 | -2.366 | 1.00167.89 |
| ATOM<br>C   | 388 | CA  | ASP X 488 | 37.768-111.581 | -3.633 | 1.00175.89 |
| ATOM<br>C   | 389 | C   | ASP X 488 | 38.871-112.589 | -3.334 | 1.00161.82 |
| ATOM<br>O   | 390 | O   | ASP X 488 | 39.098-113.529 | -4.083 | 1.00140.28 |
| ATOM<br>C   | 391 | CB  | ASP X 488 | 38.371-110.302 | -4.283 | 1.00 0.00  |
| ATOM<br>C   | 392 | CG  | ASP X 488 | 37.292-109.259 | -4.573 | 1.00 0.00  |
| ATOM<br>O   | 393 | OD1 | ASP X 488 | 37.152-108.226 | -3.919 | 1.00 0.00  |
| ATOM<br>O1- | 394 | OD2 | ASP X 488 | 36.488-109.577 | -5.630 | 1.00 0.00  |
| ATOM<br>N   | 395 | N   | VAL X 489 | 39.554-112.378 | -2.215 | 1.00157.52 |

|      |     |     |     |   |     |                |        |            |
|------|-----|-----|-----|---|-----|----------------|--------|------------|
| ATOM | 396 | CA  | VAL | X | 489 | 40.703-113.229 | -1.823 | 1.00162.55 |
| C    |     |     |     |   |     |                |        |            |
| ATOM | 397 | C   | VAL | X | 489 | 40.274-114.643 | -1.370 | 1.00167.52 |
| C    |     |     |     |   |     |                |        |            |
| ATOM | 398 | O   | VAL | X | 489 | 39.111-114.870 | -1.045 | 1.00188.08 |
| O    |     |     |     |   |     |                |        |            |
| ATOM | 399 | CB  | VAL | X | 489 | 41.521-112.526 | -0.699 | 1.00158.70 |
| C    |     |     |     |   |     |                |        |            |
| ATOM | 400 | CG1 | VAL | X | 489 | 40.691-112.347 | 0.569  | 1.00153.88 |
| C    |     |     |     |   |     |                |        |            |
| ATOM | 401 | CG2 | VAL | X | 489 | 42.813-113.266 | -0.393 | 1.00158.45 |
| C    |     |     |     |   |     |                |        |            |
| ATOM | 402 | N   | GLU | X | 490 | 41.198-115.602 | -1.412 | 1.00154.17 |
| N    |     |     |     |   |     |                |        |            |
| ATOM | 403 | CA  | GLU | X | 490 | 41.087-116.803 | -0.589 | 1.00147.62 |
| C    |     |     |     |   |     |                |        |            |
| ATOM | 404 | C   | GLU | X | 490 | 41.986-116.578 | 0.624  | 1.00155.54 |
| C    |     |     |     |   |     |                |        |            |
| ATOM | 405 | O   | GLU | X | 490 | 42.957-115.837 | 0.529  | 1.00163.62 |
| O    |     |     |     |   |     |                |        |            |
| ATOM | 406 | CB  | GLU | X | 490 | 41.485-118.052 | -1.403 | 1.00141.05 |
| C    |     |     |     |   |     |                |        |            |
| ATOM | 407 | CG  | GLU | X | 490 | 42.763-118.761 | -0.972 | 1.00146.16 |
| C    |     |     |     |   |     |                |        |            |
| ATOM | 408 | CD  | GLU | X | 490 | 42.510-120.072 | -0.231 | 1.00150.83 |
| C    |     |     |     |   |     |                |        |            |
| ATOM | 409 | OE1 | GLU | X | 490 | 43.181-121.075 | -0.559 | 1.00154.33 |
| O    |     |     |     |   |     |                |        |            |
| ATOM | 410 | OE2 | GLU | X | 490 | 41.664-120.101 | 0.693  | 1.00154.94 |
| O1-  |     |     |     |   |     |                |        |            |
| ATOM | 411 | N   | THR | X | 491 | 41.608-117.125 | 1.781  | 1.00161.96 |
| N    |     |     |     |   |     |                |        |            |
| ATOM | 412 | CA  | THR | X | 491 | 42.560-117.343 | 2.884  | 1.00163.44 |
| C    |     |     |     |   |     |                |        |            |
| ATOM | 413 | C   | THR | X | 491 | 42.374-118.763 | 3.459  | 1.00160.04 |
| C    |     |     |     |   |     |                |        |            |
| ATOM | 414 | O   | THR | X | 491 | 41.436-119.471 | 3.088  | 1.00141.25 |
| O    |     |     |     |   |     |                |        |            |
| ATOM | 415 | CB  | THR | X | 491 | 42.404-116.290 | 4.013  | 1.00161.22 |
| C    |     |     |     |   |     |                |        |            |
| ATOM | 416 | OG1 | THR | X | 491 | 41.150-116.477 | 4.677  | 1.00162.20 |
| O    |     |     |     |   |     |                |        |            |
| ATOM | 417 | CG2 | THR | X | 491 | 42.488-114.853 | 3.456  | 1.00153.17 |
| C    |     |     |     |   |     |                |        |            |
| ATOM | 418 | N   | ASP | X | 492 | 43.317-119.196 | 4.294  | 1.00170.14 |
| N    |     |     |     |   |     |                |        |            |
| ATOM | 419 | CA  | ASP | X | 492 | 43.300-120.561 | 4.860  | 1.00174.66 |
| C    |     |     |     |   |     |                |        |            |
| ATOM | 420 | C   | ASP | X | 492 | 42.309-120.675 | 6.011  | 1.00172.92 |
| C    |     |     |     |   |     |                |        |            |
| ATOM | 421 | O   | ASP | X | 492 | 41.587-121.664 | 6.118  | 1.00181.51 |
| O    |     |     |     |   |     |                |        |            |
| ATOM | 422 | CB  | ASP | X | 492 | 44.698-120.981 | 5.350  | 1.00172.74 |
| C    |     |     |     |   |     |                |        |            |

|             |     |     |           |                |        |            |
|-------------|-----|-----|-----------|----------------|--------|------------|
| ATOM<br>C   | 423 | CG  | ASP X 492 | 45.334-122.017 | 4.465  | 1.00171.98 |
| ATOM<br>O   | 424 | OD1 | ASP X 492 | 45.437-121.754 | 3.245  | 1.00173.89 |
| ATOM<br>O1- | 425 | OD2 | ASP X 492 | 45.722-123.090 | 4.986  | 1.00163.23 |
| ATOM<br>N   | 426 | N   | THR X 493 | 42.347-119.703 | 6.915  | 1.00163.59 |
| ATOM<br>C   | 427 | CA  | THR X 493 | 41.353-119.594 | 7.969  | 1.00157.75 |
| ATOM<br>C   | 428 | C   | THR X 493 | 40.856-118.172 | 7.994  | 1.00143.72 |
| ATOM<br>O   | 429 | O   | THR X 493 | 41.549-117.263 | 7.559  | 1.00137.14 |
| ATOM<br>C   | 430 | CB  | THR X 493 | 41.938-119.945 | 9.359  | 1.00179.70 |
| ATOM<br>O   | 431 | OG1 | THR X 493 | 42.648-118.817 | 9.892  | 1.00195.33 |
| ATOM<br>C   | 432 | CG2 | THR X 493 | 42.885-121.153 | 9.285  | 1.00185.09 |
| ATOM<br>N   | 433 | N   | VAL X 494 | 39.667-117.969 | 8.532  | 1.00133.99 |
| ATOM<br>C   | 434 | CA  | VAL X 494 | 39.077-116.642 | 8.540  | 1.00133.59 |
| ATOM<br>C   | 435 | C   | VAL X 494 | 38.065-116.560 | 9.662  | 1.00132.70 |
| ATOM<br>O   | 436 | O   | VAL X 494 | 37.402-117.549 | 9.973  | 1.00130.33 |
| ATOM<br>C   | 437 | CB  | VAL X 494 | 38.411-116.320 | 7.181  | 1.00131.79 |
| ATOM<br>C   | 438 | CG1 | VAL X 494 | 37.197-117.206 | 6.959  | 1.00130.34 |
| ATOM<br>C   | 439 | CG2 | VAL X 494 | 38.050-114.846 | 7.076  | 1.00129.33 |
| ATOM<br>N   | 440 | N   | ALA X 495 | 37.967-115.377 | 10.270 | 1.00131.47 |
| ATOM<br>C   | 441 | CA  | ALA X 495 | 37.234-115.181 | 11.525 | 1.00127.02 |
| ATOM<br>C   | 442 | C   | ALA X 495 | 35.875-114.529 | 11.222 | 1.00124.94 |
| ATOM<br>O   | 443 | O   | ALA X 495 | 35.645-114.111 | 10.091 | 1.00129.84 |
| ATOM<br>C   | 444 | CB  | ALA X 495 | 38.068-114.312 | 12.457 | 1.00129.65 |
| ATOM<br>N   | 445 | N   | PRO X 496 | 34.967-114.450 | 12.224 | 1.00126.11 |
| ATOM<br>C   | 446 | CA  | PRO X 496 | 33.627-113.881 | 12.003 | 1.00122.49 |
| ATOM<br>C   | 447 | C   | PRO X 496 | 33.659-112.570 | 11.273 | 1.00122.22 |
| ATOM<br>O   | 448 | O   | PRO X 496 | 34.669-111.867 | 11.289 | 1.00121.05 |
| ATOM<br>C   | 449 | CB  | PRO X 496 | 33.083-113.647 | 13.425 | 1.00124.73 |

|             |     |     |           |                |        |            |
|-------------|-----|-----|-----------|----------------|--------|------------|
| ATOM<br>C   | 450 | CG  | PRO X 496 | 33.903-114.501 | 14.299 | 1.00132.36 |
| ATOM<br>C   | 451 | CD  | PRO X 496 | 35.263-114.559 | 13.660 | 1.00136.09 |
| ATOM<br>N   | 452 | N   | GLY X 497 | 32.519-112.192 | 10.722 | 1.00125.63 |
| ATOM<br>C   | 453 | CA  | GLY X 497 | 32.389-110.898 | 10.055 | 1.00138.05 |
| ATOM<br>C   | 454 | C   | GLY X 497 | 32.518-111.049 | 8.562  | 1.00137.03 |
| ATOM<br>O   | 455 | O   | GLY X 497 | 31.602-110.714 | 7.811  | 1.00143.64 |
| ATOM<br>N   | 456 | N   | GLU X 498 | 33.611-111.657 | 8.136  | 1.00129.65 |
| ATOM<br>C   | 457 | CA  | GLU X 498 | 33.915-111.721 | 6.741  | 1.00127.57 |
| ATOM<br>C   | 458 | C   | GLU X 498 | 32.806-112.419 | 5.926  | 1.00120.01 |
| ATOM<br>O   | 459 | O   | GLU X 498 | 31.799-112.930 | 6.462  | 1.00109.62 |
| ATOM<br>C   | 460 | CB  | GLU X 498 | 35.292-112.352 | 6.520  | 1.00145.07 |
| ATOM<br>C   | 461 | CG  | GLU X 498 | 36.446-111.449 | 6.996  | 1.00163.35 |
| ATOM<br>C   | 462 | CD  | GLU X 498 | 37.791-111.738 | 6.325  | 1.00173.24 |
| ATOM<br>O   | 463 | OE1 | GLU X 498 | 38.801-111.852 | 7.071  | 1.00178.59 |
| ATOM<br>O1- | 464 | OE2 | GLU X 498 | 37.850-111.798 | 5.064  | 1.00161.45 |
| ATOM<br>N   | 465 | N   | ASN X 499 | 32.966-112.323 | 4.614  | 1.00117.75 |
| ATOM<br>C   | 466 | CA  | ASN X 499 | 31.974-112.743 | 3.649  | 1.00110.82 |
| ATOM<br>C   | 467 | C   | ASN X 499 | 32.539-113.884 | 2.822  | 1.00103.83 |
| ATOM<br>O   | 468 | O   | ASN X 499 | 33.115-113.664 | 1.759  | 1.00104.94 |
| ATOM<br>C   | 469 | CB  | ASN X 499 | 31.624-111.564 | 2.731  | 1.00113.23 |
| ATOM<br>C   | 470 | CG  | ASN X 499 | 30.518-110.702 | 3.295  | 1.00116.04 |
| ATOM<br>O   | 471 | OD1 | ASN X 499 | 29.490-111.219 | 3.733  | 1.00116.91 |
| ATOM<br>N   | 472 | ND2 | ASN X 499 | 30.688-109.378 | 3.227  | 1.00121.89 |
| ATOM<br>N   | 473 | N   | LEU X 500 | 32.271-115.103 | 3.256  | 1.00 97.37 |
| ATOM<br>C   | 474 | CA  | LEU X 500 | 32.887-116.249 | 2.666  | 1.00 99.48 |
| ATOM<br>C   | 475 | C   | LEU X 500 | 32.027-116.829 | 1.566  | 1.00 97.25 |
| ATOM<br>O   | 476 | O   | LEU X 500 | 30.823-117.056 | 1.747  | 1.00 93.06 |

|      |     |     |     |   |     |                |        |            |
|------|-----|-----|-----|---|-----|----------------|--------|------------|
| ATOM | 477 | CB  | LEU | X | 500 | 33.052-117.313 | 3.705  | 1.00109.22 |
| C    |     |     |     |   |     |                |        |            |
| ATOM | 478 | CG  | LEU | X | 500 | 33.894-116.988 | 4.919  | 1.00123.59 |
| C    |     |     |     |   |     |                |        |            |
| ATOM | 479 | CD1 | LEU | X | 500 | 34.016-115.497 | 5.219  | 1.00127.67 |
| C    |     |     |     |   |     |                |        |            |
| ATOM | 480 | CD2 | LEU | X | 500 | 33.312-117.728 | 6.114  | 1.00131.22 |
| C    |     |     |     |   |     |                |        |            |
| ATOM | 481 | N   | LYS | X | 501 | 32.665-117.168 | 0.460  | 1.00 94.98 |
| N    |     |     |     |   |     |                |        |            |
| ATOM | 482 | CA  | LYS | X | 501 | 32.260-118.334 | -0.289 | 1.00 95.34 |
| C    |     |     |     |   |     |                |        |            |
| ATOM | 483 | C   | LYS | X | 501 | 33.125-119.535 | 0.159  | 1.00 93.53 |
| C    |     |     |     |   |     |                |        |            |
| ATOM | 484 | O   | LYS | X | 501 | 34.332-119.393 | 0.466  | 1.00 90.82 |
| O    |     |     |     |   |     |                |        |            |
| ATOM | 485 | CB  | LYS | X | 501 | 32.403-118.092 | -1.800 | 1.00102.55 |
| C    |     |     |     |   |     |                |        |            |
| ATOM | 486 | CG  | LYS | X | 501 | 31.631-116.900 | -2.365 | 1.00104.51 |
| C    |     |     |     |   |     |                |        |            |
| ATOM | 487 | CD  | LYS | X | 501 | 31.913-116.668 | -3.873 | 1.00109.03 |
| C    |     |     |     |   |     |                |        |            |
| ATOM | 488 | CE  | LYS | X | 501 | 31.284-115.363 | -4.381 | 1.00111.67 |
| C    |     |     |     |   |     |                |        |            |
| ATOM | 489 | NZ  | LYS | X | 501 | 31.378-115.157 | -5.851 | 1.00112.06 |
| N1+  |     |     |     |   |     |                |        |            |
| ATOM | 490 | N   | ILE | X | 502 | 32.494-120.703 | 0.236  | 1.00 91.07 |
| N    |     |     |     |   |     |                |        |            |
| ATOM | 491 | CA  | ILE | X | 502 | 33.139-121.899 | 0.765  | 1.00 93.21 |
| C    |     |     |     |   |     |                |        |            |
| ATOM | 492 | C   | ILE | X | 502 | 32.789-123.063 | -0.120 | 1.00 93.06 |
| C    |     |     |     |   |     |                |        |            |
| ATOM | 493 | O   | ILE | X | 502 | 31.609-123.423 | -0.232 | 1.00 83.92 |
| O    |     |     |     |   |     |                |        |            |
| ATOM | 494 | CB  | ILE | X | 502 | 32.617-122.264 | 2.184  | 1.00 97.44 |
| C    |     |     |     |   |     |                |        |            |
| ATOM | 495 | CG1 | ILE | X | 502 | 32.626-121.049 | 3.149  | 1.00 96.29 |
| C    |     |     |     |   |     |                |        |            |
| ATOM | 496 | CG2 | ILE | X | 502 | 33.406-123.439 | 2.772  | 1.00 99.47 |
| C    |     |     |     |   |     |                |        |            |
| ATOM | 497 | CD1 | ILE | X | 502 | 33.896-120.858 | 3.961  | 1.00 92.96 |
| C    |     |     |     |   |     |                |        |            |
| ATOM | 498 | N   | ARG | X | 503 | 33.803-123.678 | -0.723 | 1.00 99.56 |
| N    |     |     |     |   |     |                |        |            |
| ATOM | 499 | CA  | ARG | X | 503 | 33.588-124.958 | -1.387 | 1.00108.84 |
| C    |     |     |     |   |     |                |        |            |
| ATOM | 500 | C   | ARG | X | 503 | 33.479-126.096 | -0.383 | 1.00109.85 |
| C    |     |     |     |   |     |                |        |            |
| ATOM | 501 | O   | ARG | X | 503 | 34.355-126.299 | 0.455  | 1.00 98.84 |
| O    |     |     |     |   |     |                |        |            |
| ATOM | 502 | CB  | ARG | X | 503 | 34.660-125.267 | -2.449 | 1.00119.22 |
| C    |     |     |     |   |     |                |        |            |
| ATOM | 503 | CG  | ARG | X | 503 | 34.195-126.258 | -3.544 | 1.00124.48 |
| C    |     |     |     |   |     |                |        |            |

|             |     |     |           |                |        |            |
|-------------|-----|-----|-----------|----------------|--------|------------|
| ATOM<br>C   | 504 | CD  | ARG X 503 | 34.837-126.023 | -4.913 | 1.00133.66 |
| ATOM<br>N   | 505 | NE  | ARG X 503 | 35.044-124.603 | -5.231 | 1.00146.24 |
| ATOM<br>C   | 506 | CZ  | ARG X 503 | 36.160-123.906 | -4.992 | 1.00163.09 |
| ATOM<br>N   | 507 | NH1 | ARG X 503 | 37.215-124.479 | -4.412 | 1.00176.11 |
| ATOM<br>N1+ | 508 | NH2 | ARG X 503 | 36.212-122.614 | -5.312 | 1.00168.72 |
| ATOM<br>N   | 509 | N   | LEU X 504 | 32.391-126.848 | -0.525 | 1.00123.87 |
| ATOM<br>C   | 510 | CA  | LEU X 504 | 32.012-127.935 | 0.379  | 1.00140.47 |
| ATOM<br>C   | 511 | C   | LEU X 504 | 32.126-129.271 | -0.346 | 1.00142.59 |
| ATOM<br>O   | 512 | O   | LEU X 504 | 31.792-129.338 | -1.530 | 1.00169.43 |
| ATOM<br>C   | 513 | CB  | LEU X 504 | 30.542-127.756 | 0.801  | 1.00152.44 |
| ATOM<br>C   | 514 | CG  | LEU X 504 | 30.247-126.929 | 2.057  | 1.00169.24 |
| ATOM<br>C   | 515 | CD1 | LEU X 504 | 30.868-125.539 | 1.957  | 1.00172.59 |
| ATOM<br>C   | 516 | CD2 | LEU X 504 | 28.737-126.864 | 2.304  | 1.00170.39 |
| ATOM<br>N   | 517 | N   | LYS X 505 | 32.554-130.337 | 0.352  | 1.00132.97 |
| ATOM<br>C   | 518 | CA  | LYS X 505 | 32.416-131.717 | -0.174 | 1.00127.74 |
| ATOM<br>C   | 519 | C   | LYS X 505 | 31.606-132.579 | 0.734  | 1.00125.38 |
| ATOM<br>O   | 520 | O   | LYS X 505 | 32.024-132.808 | 1.851  | 1.00132.67 |
| ATOM<br>C   | 521 | CB  | LYS X 505 | 33.772-132.374 | -0.310 | 1.00125.21 |
| ATOM<br>C   | 522 | CG  | LYS X 505 | 33.703-133.876 | -0.556 | 1.00128.19 |
| ATOM<br>C   | 523 | CD  | LYS X 505 | 34.227-134.679 | 0.627  | 1.00128.91 |
| ATOM<br>C   | 524 | CE  | LYS X 505 | 35.633-134.250 | 1.040  | 1.00130.48 |
| ATOM<br>N1+ | 525 | NZ  | LYS X 505 | 36.652-135.318 | 0.790  | 1.00134.50 |
| ATOM<br>N   | 526 | N   | GLY X 506 | 30.525-133.167 | 0.228  | 1.00123.20 |
| ATOM<br>C   | 527 | CA  | GLY X 506 | 29.592-133.887 | 1.101  | 1.00130.82 |
| ATOM<br>C   | 528 | C   | GLY X 506 | 28.620-134.727 | 0.319  | 1.00145.39 |
| ATOM<br>O   | 529 | O   | GLY X 506 | 28.663-134.724 | -0.907 | 1.00153.75 |
| ATOM<br>N   | 530 | N   | ILE X 507 | 27.787-135.505 | 1.016  | 1.00164.77 |

|      |     |     |     |   |     |                |        |            |
|------|-----|-----|-----|---|-----|----------------|--------|------------|
| ATOM | 531 | CA  | ILE | X | 507 | 26.746-136.310 | 0.339  | 1.00183.94 |
| C    |     |     |     |   |     |                |        |            |
| ATOM | 532 | C   | ILE | X | 507 | 25.641-135.343 | -0.143 | 1.00187.09 |
| C    |     |     |     |   |     |                |        |            |
| ATOM | 533 | O   | ILE | X | 507 | 24.908-135.665 | -1.077 | 1.00193.34 |
| O    |     |     |     |   |     |                |        |            |
| ATOM | 534 | CB  | ILE | X | 507 | 26.179-137.498 | 1.237  | 1.00188.66 |
| C    |     |     |     |   |     |                |        |            |
| ATOM | 535 | CG1 | ILE | X | 507 | 27.237-138.633 | 1.441  | 1.00182.52 |
| C    |     |     |     |   |     |                |        |            |
| ATOM | 536 | CG2 | ILE | X | 507 | 24.867-138.068 | 0.670  | 1.00185.18 |
| C    |     |     |     |   |     |                |        |            |
| ATOM | 537 | CD1 | ILE | X | 507 | 27.063-139.885 | 0.590  | 1.00176.35 |
| C    |     |     |     |   |     |                |        |            |
| ATOM | 538 | N   | GLU | X | 508 | 25.607-134.121 | 0.409  | 1.00183.95 |
| N    |     |     |     |   |     |                |        |            |
| ATOM | 539 | CA  | GLU | X | 508 | 24.574-133.129 | 0.031  | 1.00187.00 |
| C    |     |     |     |   |     |                |        |            |
| ATOM | 540 | C   | GLU | X | 508 | 25.151-131.819 | -0.556 | 1.00171.46 |
| C    |     |     |     |   |     |                |        |            |
| ATOM | 541 | O   | GLU | X | 508 | 25.692-130.975 | 0.204  | 1.00166.71 |
| O    |     |     |     |   |     |                |        |            |
| ATOM | 542 | CB  | GLU | X | 508 | 23.676-132.822 | 1.238  | 1.00197.01 |
| C    |     |     |     |   |     |                |        |            |
| ATOM | 543 | CG  | GLU | X | 508 | 22.235-132.461 | 0.870  | 1.00194.77 |
| C    |     |     |     |   |     |                |        |            |
| ATOM | 544 | CD  | GLU | X | 508 | 21.307-133.664 | 0.730  | 1.00192.02 |
| C    |     |     |     |   |     |                |        |            |
| ATOM | 545 | OE1 | GLU | X | 508 | 20.856-134.195 | 1.775  | 1.00204.28 |
| O    |     |     |     |   |     |                |        |            |
| ATOM | 546 | OE2 | GLU | X | 508 | 20.982-134.040 | -0.421 | 1.00169.17 |
| O1-  |     |     |     |   |     |                |        |            |
| ATOM | 547 | N   | GLU | X | 509 | 24.953-131.625 | -1.884 | 1.00143.79 |
| N    |     |     |     |   |     |                |        |            |
| ATOM | 548 | CA  | GLU | X | 509 | 25.841-130.767 | -2.726 | 1.00124.42 |
| C    |     |     |     |   |     |                |        |            |
| ATOM | 549 | C   | GLU | X | 509 | 25.156-129.809 | -3.755 | 1.00114.37 |
| C    |     |     |     |   |     |                |        |            |
| ATOM | 550 | O   | GLU | X | 509 | 25.757-128.896 | -4.277 | 1.00108.66 |
| O    |     |     |     |   |     |                |        |            |
| ATOM | 551 | CB  | GLU | X | 509 | 26.887-131.638 | -3.388 | 1.00123.55 |
| C    |     |     |     |   |     |                |        |            |
| ATOM | 552 | CG  | GLU | X | 509 | 27.654-132.500 | -2.387 | 1.00133.66 |
| C    |     |     |     |   |     |                |        |            |
| ATOM | 553 | CD  | GLU | X | 509 | 28.137-131.740 | -1.124 | 1.00139.27 |
| C    |     |     |     |   |     |                |        |            |
| ATOM | 554 | OE1 | GLU | X | 509 | 29.035-130.884 | -1.240 | 1.00142.54 |
| O    |     |     |     |   |     |                |        |            |
| ATOM | 555 | OE2 | GLU | X | 509 | 27.652-132.029 | 0.005  | 1.00140.39 |
| O1-  |     |     |     |   |     |                |        |            |
| ATOM | 556 | N   | GLU | X | 510 | 23.887-130.011 | -3.999 | 1.00112.15 |
| N    |     |     |     |   |     |                |        |            |
| ATOM | 557 | CA  | GLU | X | 510 | 22.903-128.942 | -4.019 | 1.00109.95 |
| C    |     |     |     |   |     |                |        |            |



|      |     |     |     |   |     |                |        |            |
|------|-----|-----|-----|---|-----|----------------|--------|------------|
| ATOM | 558 | C   | GLU | X | 510 | 21.790-129.872 | -3.445 | 1.00112.91 |
| C    |     |     |     |   |     |                |        |            |
| ATOM | 559 | O   | GLU | X | 510 | 22.134-130.963 | -3.014 | 1.00110.06 |
| O    |     |     |     |   |     |                |        |            |
| ATOM | 560 | CB  | GLU | X | 510 | 22.746-128.394 | -5.445 | 1.00112.99 |
| C    |     |     |     |   |     |                |        |            |
| ATOM | 561 | CG  | GLU | X | 510 | 21.636-129.008 | -6.326 | 1.00125.17 |
| C    |     |     |     |   |     |                |        |            |
| ATOM | 562 | CD  | GLU | X | 510 | 21.784-130.533 | -6.720 | 1.00127.01 |
| C    |     |     |     |   |     |                |        |            |
| ATOM | 563 | OE1 | GLU | X | 510 | 21.015-131.378 | -6.165 | 1.00127.11 |
| O    |     |     |     |   |     |                |        |            |
| ATOM | 564 | OE2 | GLU | X | 510 | 22.499-130.868 | -7.718 | 1.00116.65 |
| O1-  |     |     |     |   |     |                |        |            |
| ATOM | 565 | N   | GLU | X | 511 | 20.601-129.349 | -3.276 | 1.00119.45 |
| N    |     |     |     |   |     |                |        |            |
| ATOM | 566 | CA  | GLU | X | 511 | 19.613-130.011 | -2.477 | 1.00129.93 |
| C    |     |     |     |   |     |                |        |            |
| ATOM | 567 | C   | GLU | X | 511 | 19.831-129.467 | -1.022 | 1.00113.23 |
| C    |     |     |     |   |     |                |        |            |
| ATOM | 568 | O   | GLU | X | 511 | 19.349-130.035 | -0.055 | 1.00104.04 |
| O    |     |     |     |   |     |                |        |            |
| ATOM | 569 | CB  | GLU | X | 511 | 19.756-131.520 | -2.504 | 1.00145.93 |
| C    |     |     |     |   |     |                |        |            |
| ATOM | 570 | CG  | GLU | X | 511 | 18.824-132.236 | -1.526 | 1.00151.74 |
| C    |     |     |     |   |     |                |        |            |
| ATOM | 571 | CD  | GLU | X | 511 | 17.493-131.523 | -1.324 | 1.00143.87 |
| C    |     |     |     |   |     |                |        |            |
| ATOM | 572 | OE1 | GLU | X | 511 | 17.005-130.899 | -2.283 | 1.00145.17 |
| O    |     |     |     |   |     |                |        |            |
| ATOM | 573 | OE2 | GLU | X | 511 | 16.955-131.564 | -0.199 | 1.00124.74 |
| O1-  |     |     |     |   |     |                |        |            |
| ATOM | 574 | N   | ILE | X | 512 | 20.586-128.371 | -0.891 | 1.00103.65 |
| N    |     |     |     |   |     |                |        |            |
| ATOM | 575 | CA  | ILE | X | 512 | 20.846-127.664 | 0.354  | 1.00 95.33 |
| C    |     |     |     |   |     |                |        |            |
| ATOM | 576 | C   | ILE | X | 512 | 20.208-126.315 | 0.085  | 1.00 95.78 |
| C    |     |     |     |   |     |                |        |            |
| ATOM | 577 | O   | ILE | X | 512 | 20.432-125.761 | -0.970 | 1.00 96.52 |
| O    |     |     |     |   |     |                |        |            |
| ATOM | 578 | CB  | ILE | X | 512 | 22.349-127.541 | 0.635  | 1.00 90.55 |
| C    |     |     |     |   |     |                |        |            |
| ATOM | 579 | CG1 | ILE | X | 512 | 23.022-126.403 | -0.127 | 1.00 87.34 |
| C    |     |     |     |   |     |                |        |            |
| ATOM | 580 | CG2 | ILE | X | 512 | 23.029-128.825 | 0.240  | 1.00 91.38 |
| C    |     |     |     |   |     |                |        |            |
| ATOM | 581 | CD1 | ILE | X | 512 | 24.498-126.315 | 0.126  | 1.00 87.83 |
| C    |     |     |     |   |     |                |        |            |
| ATOM | 582 | N   | LEU | X | 513 | 19.437-125.774 | 1.007  | 1.00100.10 |
| N    |     |     |     |   |     |                |        |            |
| ATOM | 583 | CA  | LEU | X | 513 | 18.757-124.519 | 0.744  | 1.00103.27 |
| C    |     |     |     |   |     |                |        |            |
| ATOM | 584 | C   | LEU | X | 513 | 19.093-123.413 | 1.691  | 1.00104.82 |
| C    |     |     |     |   |     |                |        |            |

|           |     |     |           |                |        |            |
|-----------|-----|-----|-----------|----------------|--------|------------|
| ATOM<br>O | 585 | O   | LEU X 513 | 19.557-123.651 | 2.782  | 1.00100.89 |
| ATOM<br>C | 586 | CB  | LEU X 513 | 17.261-124.735 | 0.858  | 1.00105.40 |
| ATOM<br>C | 587 | CG  | LEU X 513 | 16.571-125.675 | -0.107 | 1.00112.52 |
| ATOM<br>C | 588 | CD1 | LEU X 513 | 17.354-126.959 | -0.279 | 1.00113.29 |
| ATOM<br>C | 589 | CD2 | LEU X 513 | 15.177-125.957 | 0.414  | 1.00113.29 |
| ATOM<br>N | 590 | N   | PRO X 514 | 18.854-122.182 | 1.282  | 1.00105.88 |
| ATOM<br>C | 591 | CA  | PRO X 514 | 19.126-121.083 | 2.223  | 1.00 99.21 |
| ATOM<br>C | 592 | C   | PRO X 514 | 18.221-120.985 | 3.472  | 1.00 95.52 |
| ATOM<br>O | 593 | O   | PRO X 514 | 16.969-121.170 | 3.429  | 1.00 88.47 |
| ATOM<br>C | 594 | CB  | PRO X 514 | 19.030-119.840 | 1.334  | 1.00 98.74 |
| ATOM<br>C | 595 | CG  | PRO X 514 | 19.466-120.334 | -0.035 | 1.00 98.92 |
| ATOM<br>C | 596 | CD  | PRO X 514 | 18.896-121.718 | -0.135 | 1.00102.34 |
| ATOM<br>N | 597 | N   | GLY X 515 | 18.886-120.636 | 4.573  | 1.00 95.86 |
| ATOM<br>C | 598 | CA  | GLY X 515 | 18.310-120.749 | 5.900  | 1.00 94.68 |
| ATOM<br>C | 599 | C   | GLY X 515 | 18.412-122.149 | 6.388  | 1.00 92.73 |
| ATOM<br>O | 600 | O   | GLY X 515 | 17.495-122.650 | 7.042  | 1.00 86.47 |
| ATOM<br>N | 601 | N   | PHE X 516 | 19.402-122.844 | 5.838  | 1.00 95.30 |
| ATOM<br>C | 602 | CA  | PHE X 516 | 20.303-123.625 | 6.644  | 1.00 95.73 |
| ATOM<br>C | 603 | C   | PHE X 516 | 21.507-122.749 | 6.938  | 1.00 92.85 |
| ATOM<br>O | 604 | O   | PHE X 516 | 21.653-121.629 | 6.400  | 1.00 81.10 |
| ATOM<br>C | 605 | CB  | PHE X 516 | 20.779-124.933 | 5.946  | 1.00 97.35 |
| ATOM<br>C | 606 | CG  | PHE X 516 | 19.666-125.855 | 5.493  | 1.00101.11 |
| ATOM<br>C | 607 | CD1 | PHE X 516 | 18.338-125.674 | 5.907  | 1.00102.41 |
| ATOM<br>C | 608 | CD2 | PHE X 516 | 19.943-126.894 | 4.594  | 1.00102.08 |
| ATOM<br>C | 609 | CE1 | PHE X 516 | 17.309-126.492 | 5.413  | 1.00103.38 |
| ATOM<br>C | 610 | CE2 | PHE X 516 | 18.919-127.721 | 4.113  | 1.00103.73 |
| ATOM<br>C | 611 | CZ  | PHE X 516 | 17.600-127.526 | 4.532  | 1.00102.97 |

|      |     |     |     |   |     |                |        |      |        |
|------|-----|-----|-----|---|-----|----------------|--------|------|--------|
| ATOM | 612 | N   | ILE | X | 517 | 22.421-123.386 | 7.673  | 1.00 | 98.22  |
| N    |     |     |     |   |     |                |        |      |        |
| ATOM | 613 | CA  | ILE | X | 517 | 23.584-122.791 | 8.341  | 1.00 | 98.22  |
| C    |     |     |     |   |     |                |        |      |        |
| ATOM | 614 | C   | ILE | X | 517 | 24.633-123.922 | 8.405  | 1.00 | 97.93  |
| C    |     |     |     |   |     |                |        |      |        |
| ATOM | 615 | O   | ILE | X | 517 | 24.287-125.092 | 8.356  | 1.00 | 96.34  |
| O    |     |     |     |   |     |                |        |      |        |
| ATOM | 616 | CB  | ILE | X | 517 | 23.244-122.378 | 9.796  | 1.00 | 97.23  |
| C    |     |     |     |   |     |                |        |      |        |
| ATOM | 617 | CG1 | ILE | X | 517 | 22.063-123.202 | 10.313 | 1.00 | 102.95 |
| C    |     |     |     |   |     |                |        |      |        |
| ATOM | 618 | CG2 | ILE | X | 517 | 22.880-120.911 | 9.883  | 1.00 | 95.14  |
| C    |     |     |     |   |     |                |        |      |        |
| ATOM | 619 | CD1 | ILE | X | 517 | 21.751-123.009 | 11.780 | 1.00 | 112.14 |
| C    |     |     |     |   |     |                |        |      |        |
| ATOM | 620 | N   | LEU | X | 518 | 25.903-123.596 | 8.479  | 1.00 | 101.09 |
| N    |     |     |     |   |     |                |        |      |        |
| ATOM | 621 | CA  | LEU | X | 518 | 26.860-124.601 | 8.863  | 1.00 | 114.00 |
| C    |     |     |     |   |     |                |        |      |        |
| ATOM | 622 | C   | LEU | X | 518 | 26.861-124.645 | 10.375 | 1.00 | 137.46 |
| C    |     |     |     |   |     |                |        |      |        |
| ATOM | 623 | O   | LEU | X | 518 | 26.411-123.696 | 11.018 | 1.00 | 175.40 |
| O    |     |     |     |   |     |                |        |      |        |
| ATOM | 624 | CB  | LEU | X | 518 | 28.222-124.243 | 8.345  | 1.00 | 120.89 |
| C    |     |     |     |   |     |                |        |      |        |
| ATOM | 625 | CG  | LEU | X | 518 | 28.292-124.359 | 6.840  | 1.00 | 140.02 |
| C    |     |     |     |   |     |                |        |      |        |
| ATOM | 626 | CD1 | LEU | X | 518 | 29.545-123.674 | 6.310  | 1.00 | 155.35 |
| C    |     |     |     |   |     |                |        |      |        |
| ATOM | 627 | CD2 | LEU | X | 518 | 28.239-125.813 | 6.401  | 1.00 | 146.90 |
| C    |     |     |     |   |     |                |        |      |        |
| ATOM | 628 | N   | CYX | X | 519 | 27.297-125.753 | 10.962 | 1.00 | 144.96 |
| N    |     |     |     |   |     |                |        |      |        |
| ATOM | 629 | CA  | CYX | X | 519 | 27.473-125.797 | 12.412 | 1.00 | 139.63 |
| C    |     |     |     |   |     |                |        |      |        |
| ATOM | 630 | C   | CYX | X | 519 | 28.641-126.673 | 12.756 | 1.00 | 129.00 |
| C    |     |     |     |   |     |                |        |      |        |
| ATOM | 631 | O   | CYX | X | 519 | 28.776-127.785 | 12.243 | 1.00 | 113.84 |
| O    |     |     |     |   |     |                |        |      |        |
| ATOM | 632 | CB  | CYX | X | 519 | 26.218-126.307 | 13.151 | 1.00 | 165.56 |
| C    |     |     |     |   |     |                |        |      |        |
| ATOM | 633 | SG  | CYX | X | 519 | 24.598-125.576 | 12.690 | 1.00 | 217.53 |
| S    |     |     |     |   |     |                |        |      |        |
| ATOM | 634 | N   | ASP | X | 520 | 29.491-126.146 | 13.628 | 1.00 | 136.24 |
| N    |     |     |     |   |     |                |        |      |        |
| ATOM | 635 | CA  | ASP | X | 520 | 30.404-126.952 | 14.466 | 1.00 | 146.93 |
| C    |     |     |     |   |     |                |        |      |        |
| ATOM | 636 | C   | ASP | X | 520 | 29.703-128.222 | 15.008 | 1.00 | 147.63 |
| C    |     |     |     |   |     |                |        |      |        |
| ATOM | 637 | O   | ASP | X | 520 | 28.625-128.137 | 15.604 | 1.00 | 149.64 |
| O    |     |     |     |   |     |                |        |      |        |
| ATOM | 638 | CB  | ASP | X | 520 | 30.927-126.096 | 15.646 | 1.00 | 146.05 |
| C    |     |     |     |   |     |                |        |      |        |

|             |     |     |     |   |     |                |        |            |
|-------------|-----|-----|-----|---|-----|----------------|--------|------------|
| ATOM<br>C   | 639 | CG  | ASP | X | 520 | 31.391-126.939 | 16.841 | 1.00148.02 |
| ATOM<br>O   | 640 | OD1 | ASP | X | 520 | 32.474-127.549 | 16.742 | 1.00148.46 |
| ATOM<br>O1- | 641 | OD2 | ASP | X | 520 | 30.684-126.977 | 17.886 | 1.00147.62 |
| ATOM<br>N   | 642 | N   | PRO | X | 521 | 30.338-129.392 | 14.839 | 1.00139.71 |
| ATOM<br>C   | 643 | CA  | PRO | X | 521 | 29.643-130.647 | 15.161 | 1.00141.48 |
| ATOM<br>C   | 644 | C   | PRO | X | 521 | 29.448-130.940 | 16.679 | 1.00151.60 |
| ATOM<br>O   | 645 | O   | PRO | X | 521 | 28.575-131.737 | 17.049 | 1.00148.84 |
| ATOM<br>C   | 646 | CB  | PRO | X | 521 | 30.507-131.720 | 14.469 | 1.00139.61 |
| ATOM<br>C   | 647 | CG  | PRO | X | 521 | 31.819-131.071 | 14.181 | 1.00137.16 |
| ATOM<br>C   | 648 | CD  | PRO | X | 521 | 31.562-129.609 | 14.044 | 1.00135.04 |
| ATOM<br>N   | 649 | N   | ASN | X | 522 | 30.196-130.262 | 17.545 | 1.00160.29 |
| ATOM<br>C   | 650 | CA  | ASN | X | 522 | 30.123-130.540 | 18.985 | 1.00166.83 |
| ATOM<br>C   | 651 | C   | ASN | X | 522 | 28.881-129.912 | 19.617 | 1.00171.91 |
| ATOM<br>O   | 652 | O   | ASN | X | 522 | 27.876-130.596 | 19.809 | 1.00177.15 |
| ATOM<br>C   | 653 | CB  | ASN | X | 522 | 31.397-130.080 | 19.687 | 1.00168.01 |
| ATOM<br>C   | 654 | CG  | ASN | X | 522 | 32.636-130.500 | 18.942 | 1.00171.94 |
| ATOM<br>O   | 655 | OD1 | ASN | X | 522 | 32.554-131.214 | 17.937 | 1.00164.02 |
| ATOM<br>N   | 656 | ND2 | ASN | X | 522 | 33.787-130.001 | 19.378 | 1.00179.97 |
| ATOM<br>N   | 657 | N   | ASN | X | 523 | 28.938-128.617 | 19.927 | 1.00171.22 |
| ATOM<br>C   | 658 | CA  | ASN | X | 523 | 27.722-127.842 | 20.116 | 1.00163.52 |
| ATOM<br>C   | 659 | C   | ASN | X | 523 | 27.284-127.328 | 18.762 | 1.00163.98 |
| ATOM<br>O   | 660 | O   | ASN | X | 523 | 27.916-126.441 | 18.194 | 1.00148.35 |
| ATOM<br>C   | 661 | CB  | ASN | X | 523 | 27.931-126.698 | 21.116 | 1.00158.27 |
| ATOM<br>C   | 662 | CG  | ASN | X | 523 | 27.332-127.005 | 22.490 | 1.00159.83 |
| ATOM<br>N   | 663 | ND2 | ASN | X | 523 | 27.852-127.835 | 23.267 | 1.00152.43 |
| ATOM<br>O   | 664 | OD1 | ASN | X | 523 | 26.228-126.342 | 22.794 | 1.00158.67 |
| ATOM<br>N   | 665 | N   | LEU | X | 524 | 26.340-128.051 | 18.165 | 1.00130.36 |

|      |     |     |     |   |     |                |        |            |
|------|-----|-----|-----|---|-----|----------------|--------|------------|
| ATOM | 666 | CA  | LEU | X | 524 | 25.733-127.666 | 16.891 | 1.00136.19 |
| C    |     |     |     |   |     |                |        |            |
| ATOM | 667 | C   | LEU | X | 524 | 24.389-126.968 | 17.151 | 1.00133.86 |
| C    |     |     |     |   |     |                |        |            |
| ATOM | 668 | O   | LEU | X | 524 | 24.061-126.665 | 18.295 | 1.00138.79 |
| O    |     |     |     |   |     |                |        |            |
| ATOM | 669 | CB  | LEU | X | 524 | 25.573-128.892 | 15.961 | 1.00134.93 |
| C    |     |     |     |   |     |                |        |            |
| ATOM | 670 | CG  | LEU | X | 524 | 24.768-130.121 | 16.409 | 1.00136.72 |
| C    |     |     |     |   |     |                |        |            |
| ATOM | 671 | CD1 | LEU | X | 524 | 23.327-129.775 | 16.758 | 1.00142.32 |
| C    |     |     |     |   |     |                |        |            |
| ATOM | 672 | CD2 | LEU | X | 524 | 24.802-131.185 | 15.322 | 1.00128.29 |
| C    |     |     |     |   |     |                |        |            |
| ATOM | 673 | N   | CYX | X | 525 | 23.627-126.703 | 16.092 | 1.00142.15 |
| N    |     |     |     |   |     |                |        |            |
| ATOM | 674 | CA  | CYX | X | 525 | 22.542-125.732 | 16.146 | 1.00131.14 |
| C    |     |     |     |   |     |                |        |            |
| ATOM | 675 | C   | CYX | X | 525 | 21.229-126.402 | 16.516 | 1.00123.92 |
| C    |     |     |     |   |     |                |        |            |
| ATOM | 676 | O   | CYX | X | 525 | 20.997-127.565 | 16.167 | 1.00119.97 |
| O    |     |     |     |   |     |                |        |            |
| ATOM | 677 | CB  | CYX | X | 525 | 22.430-125.010 | 14.805 | 1.00135.19 |
| C    |     |     |     |   |     |                |        |            |
| ATOM | 678 | SG  | CYX | X | 525 | 24.023-124.350 | 14.242 | 1.00176.88 |
| S    |     |     |     |   |     |                |        |            |
| ATOM | 679 | N   | HIE | X | 526 | 20.434-125.705 | 17.332 | 1.00179.25 |
| N    |     |     |     |   |     |                |        |            |
| ATOM | 680 | CA  | HIE | X | 526 | 19.102-126.181 | 17.715 | 1.00165.40 |
| C    |     |     |     |   |     |                |        |            |
| ATOM | 681 | C   | HIE | X | 526 | 18.235-125.906 | 16.528 | 1.00145.93 |
| C    |     |     |     |   |     |                |        |            |
| ATOM | 682 | O   | HIE | X | 526 | 18.576-125.049 | 15.714 | 1.00147.88 |
| O    |     |     |     |   |     |                |        |            |
| ATOM | 683 | CB  | HIE | X | 526 | 18.538-125.418 | 18.935 | 1.00169.06 |
| C    |     |     |     |   |     |                |        |            |
| ATOM | 684 | CG  | HIE | X | 526 | 19.415-125.455 | 20.146 | 1.00172.17 |
| C    |     |     |     |   |     |                |        |            |
| ATOM | 685 | ND1 | HIE | X | 526 | 19.896-126.634 | 20.678 | 1.00174.29 |
| N    |     |     |     |   |     |                |        |            |
| ATOM | 686 | CD2 | HIE | X | 526 | 19.853-124.465 | 20.964 | 1.00164.37 |
| C    |     |     |     |   |     |                |        |            |
| ATOM | 687 | CE1 | HIE | X | 526 | 20.637-126.364 | 21.738 | 1.00181.99 |
| C    |     |     |     |   |     |                |        |            |
| ATOM | 688 | NE2 | HIE | X | 526 | 20.637-125.054 | 21.924 | 1.00181.59 |
| N    |     |     |     |   |     |                |        |            |
| ATOM | 689 | N   | SER | X | 527 | 17.109-126.608 | 16.434 | 1.00126.26 |
| N    |     |     |     |   |     |                |        |            |
| ATOM | 690 | CA  | SER | X | 527 | 16.176-126.401 | 15.329 | 1.00114.69 |
| C    |     |     |     |   |     |                |        |            |
| ATOM | 691 | C   | SER | X | 527 | 14.813-127.059 | 15.606 | 1.00108.67 |
| C    |     |     |     |   |     |                |        |            |
| ATOM | 692 | O   | SER | X | 527 | 14.406-127.173 | 16.771 | 1.00118.24 |
| O    |     |     |     |   |     |                |        |            |

|             |     |     |           |                |        |            |
|-------------|-----|-----|-----------|----------------|--------|------------|
| ATOM<br>C   | 693 | CB  | SER X 527 | 16.788-126.913 | 14.030 | 1.00109.84 |
| ATOM<br>O   | 694 | OG  | SER X 527 | 16.309-128.184 | 13.737 | 1.00107.01 |
| ATOM<br>N   | 695 | N   | GLY X 528 | 14.113-127.473 | 14.552 | 1.00 97.52 |
| ATOM<br>C   | 696 | CA  | GLY X 528 | 12.698-127.837 | 14.659 | 1.00 94.56 |
| ATOM<br>C   | 697 | C   | GLY X 528 | 11.903-126.614 | 14.303 | 1.00 91.69 |
| ATOM<br>O   | 698 | O   | GLY X 528 | 12.486-125.667 | 13.833 | 1.00 88.49 |
| ATOM<br>N   | 699 | N   | ARG X 529 | 10.592-126.611 | 14.574 | 1.00 94.29 |
| ATOM<br>C   | 700 | CA  | ARG X 529 | 9.613-125.777  | 13.812 | 1.00 97.26 |
| ATOM<br>C   | 701 | C   | ARG X 529 | 8.543-125.003  | 14.617 | 1.00 89.70 |
| ATOM<br>O   | 702 | O   | ARG X 529 | 7.777-124.238  | 14.048 | 1.00 80.91 |
| ATOM<br>C   | 703 | CB  | ARG X 529 | 8.947-126.597  | 12.666 | 1.00110.88 |
| ATOM<br>C   | 704 | CG  | ARG X 529 | 7.759-127.532  | 12.996 | 1.00125.59 |
| ATOM<br>C   | 705 | CD  | ARG X 529 | 8.199-128.711  | 13.883 | 1.00149.85 |
| ATOM<br>N   | 706 | NE  | ARG X 529 | 7.712-128.579  | 15.283 | 1.00179.42 |
| ATOM<br>C   | 707 | CZ  | ARG X 529 | 8.454-128.728  | 16.402 | 1.00190.13 |
| ATOM<br>N   | 708 | NH1 | ARG X 529 | 9.756-129.016  | 16.352 | 1.00202.11 |
| ATOM<br>N1+ | 709 | NH2 | ARG X 529 | 7.885-128.570  | 17.597 | 1.00179.73 |
| ATOM<br>N   | 710 | N   | THR X 530 | 8.468-125.245  | 15.927 | 1.00 90.33 |
| ATOM<br>C   | 711 | CA  | THR X 530 | 7.719-124.370  | 16.833 | 1.00 88.64 |
| ATOM<br>C   | 712 | C   | THR X 530 | 8.740-123.638  | 17.625 | 1.00 86.90 |
| ATOM<br>O   | 713 | O   | THR X 530 | 9.816-124.171  | 17.874 | 1.00 86.08 |
| ATOM<br>C   | 714 | CB  | THR X 530 | 6.766-125.098  | 17.856 | 1.00 90.23 |
| ATOM<br>O   | 715 | OG1 | THR X 530 | 6.028-126.179  | 17.251 | 1.00 93.50 |
| ATOM<br>C   | 716 | CG2 | THR X 530 | 5.750-124.111  | 18.405 | 1.00 89.79 |
| ATOM<br>N   | 717 | N   | PHE X 531 | 8.380-122.426  | 18.058 | 1.00 87.90 |
| ATOM<br>C   | 718 | CA  | PHE X 531 | 9.163-121.632  | 19.061 | 1.00 87.66 |
| ATOM<br>C   | 719 | C   | PHE X 531 | 8.376-120.423  | 19.655 | 1.00 88.73 |

|             |     |     |           |                |        |      |        |
|-------------|-----|-----|-----------|----------------|--------|------|--------|
| ATOM<br>O   | 720 | O   | PHE X 531 | 7.415-119.905  | 19.059 | 1.00 | 84.76  |
| ATOM<br>C   | 721 | CB  | PHE X 531 | 10.537-121.150 | 18.493 | 1.00 | 82.94  |
| ATOM<br>C   | 722 | CG  | PHE X 531 | 10.412-120.136 | 17.403 | 1.00 | 78.61  |
| ATOM<br>C   | 723 | CD1 | PHE X 531 | 10.157-120.539 | 16.115 | 1.00 | 77.12  |
| ATOM<br>C   | 724 | CD2 | PHE X 531 | 10.434-118.799 | 17.681 | 1.00 | 75.79  |
| ATOM<br>C   | 725 | CE1 | PHE X 531 | 9.993-119.622  | 15.122 | 1.00 | 75.24  |
| ATOM<br>C   | 726 | CE2 | PHE X 531 | 10.268-117.871 | 16.676 | 1.00 | 74.77  |
| ATOM<br>C   | 727 | CZ  | PHE X 531 | 10.046-118.278 | 15.401 | 1.00 | 73.98  |
| ATOM<br>N   | 728 | N   | ASP X 532 | 8.857-119.985  | 20.824 | 1.00 | 92.27  |
| ATOM<br>C   | 729 | CA  | ASP X 532 | 8.301-118.877  | 21.581 | 1.00 | 91.83  |
| ATOM<br>C   | 730 | C   | ASP X 532 | 9.140-117.635  | 21.355 | 1.00 | 83.71  |
| ATOM<br>O   | 731 | O   | ASP X 532 | 10.378-117.704 | 21.316 | 1.00 | 81.23  |
| ATOM<br>C   | 732 | CB  | ASP X 532 | 8.350-119.226  | 23.067 | 1.00 | 104.10 |
| ATOM<br>C   | 733 | CG  | ASP X 532 | 7.516-120.465  | 23.423 | 1.00 | 121.08 |
| ATOM<br>O   | 734 | OD1 | ASP X 532 | 6.381-120.592  | 22.893 | 1.00 | 136.24 |
| ATOM<br>O1- | 735 | OD2 | ASP X 532 | 7.953-121.251  | 24.321 | 1.00 | 142.89 |
| ATOM<br>N   | 736 | N   | ALA X 533 | 8.506-116.483  | 21.280 | 1.00 | 77.23  |
| ATOM<br>C   | 737 | CA  | ALA X 533 | 9.226-115.263  | 20.967 | 1.00 | 75.48  |
| ATOM<br>C   | 738 | C   | ALA X 533 | 8.527-114.032  | 21.518 | 1.00 | 76.09  |
| ATOM<br>O   | 739 | O   | ALA X 533 | 7.302-113.930  | 21.542 | 1.00 | 73.77  |
| ATOM<br>C   | 740 | CB  | ALA X 533 | 9.438-115.158  | 19.456 | 1.00 | 74.32  |
| ATOM<br>N   | 741 | N   | GLN X 534 | 9.342-113.079  | 21.946 | 1.00 | 79.46  |
| ATOM<br>C   | 742 | CA  | GLN X 534 | 8.920-111.748  | 22.343 | 1.00 | 85.51  |
| ATOM<br>C   | 743 | C   | GLN X 534 | 8.778-110.939  | 21.060 | 1.00 | 86.08  |
| ATOM<br>O   | 744 | O   | GLN X 534 | 9.738-110.886  | 20.300 | 1.00 | 87.88  |
| ATOM<br>C   | 745 | CB  | GLN X 534 | 9.993-111.203  | 23.289 | 1.00 | 92.12  |
| ATOM<br>C   | 746 | CG  | GLN X 534 | 9.505-110.108  | 24.239 | 1.00 | 100.26 |

|           |     |     |     |   |     |                |        |            |
|-----------|-----|-----|-----|---|-----|----------------|--------|------------|
| ATOM<br>C | 747 | CD  | GLN | X | 534 | 10.495-109.947 | 25.388 | 1.00116.75 |
| ATOM<br>O | 748 | OE1 | GLN | X | 534 | 11.685-110.220 | 25.272 | 1.00117.00 |
| ATOM<br>N | 749 | NE2 | GLN | X | 534 | 10.050-109.526 | 26.549 | 1.00133.14 |
| ATOM<br>N | 750 | N   | ILE | X | 535 | 7.582-110.431  | 20.768 | 1.00 85.94 |
| ATOM<br>C | 751 | CA  | ILE | X | 535 | 7.190-109.913  | 19.448 | 1.00 85.75 |
| ATOM<br>C | 752 | C   | ILE | X | 535 | 6.589-108.512  | 19.637 | 1.00 81.61 |
| ATOM<br>O | 753 | O   | ILE | X | 535 | 5.465-108.353  | 20.115 | 1.00 84.17 |
| ATOM<br>C | 754 | CB  | ILE | X | 535 | 6.268-110.967  | 18.760 | 1.00 93.22 |
| ATOM<br>C | 755 | CG1 | ILE | X | 535 | 7.064-111.847  | 17.756 | 1.00100.80 |
| ATOM<br>C | 756 | CG2 | ILE | X | 535 | 5.030-110.441  | 18.018 | 1.00 96.93 |
| ATOM<br>C | 757 | CD1 | ILE | X | 535 | 6.262-113.021  | 17.141 | 1.00106.53 |
| ATOM<br>N | 758 | N   | VAL | X | 536 | 7.351-107.463  | 19.313 | 1.00 75.66 |
| ATOM<br>C | 759 | CA  | VAL | X | 536 | 6.823-106.087  | 19.318 | 1.00 73.87 |
| ATOM<br>C | 760 | C   | VAL | X | 536 | 6.174-105.790  | 17.969 | 1.00 71.49 |
| ATOM<br>O | 761 | O   | VAL | X | 536 | 6.825-105.791  | 16.924 | 1.00 71.14 |
| ATOM<br>C | 762 | CB  | VAL | X | 536 | 7.804-105.007  | 19.840 | 1.00 75.94 |
| ATOM<br>C | 763 | CG1 | VAL | X | 536 | 9.266-105.438  | 19.938 | 1.00 79.43 |
| ATOM<br>C | 764 | CG2 | VAL | X | 536 | 7.707-103.648  | 19.136 | 1.00 76.10 |
| ATOM<br>N | 765 | N   | ILE | X | 537 | 4.873-105.515  | 18.025 | 1.00 70.04 |
| ATOM<br>C | 766 | CA  | ILE | X | 537 | 4.018-105.130  | 16.898 | 1.00 68.61 |
| ATOM<br>C | 767 | C   | ILE | X | 537 | 4.279-103.676  | 16.614 | 1.00 70.91 |
| ATOM<br>O | 768 | O   | ILE | X | 537 | 4.029-102.803  | 17.472 | 1.00 69.64 |
| ATOM<br>C | 769 | CB  | ILE | X | 537 | 2.561-105.277  | 17.318 | 1.00 67.51 |
| ATOM<br>C | 770 | CG1 | ILE | X | 537 | 2.229-106.754  | 17.440 | 1.00 67.35 |
| ATOM<br>C | 771 | CG2 | ILE | X | 537 | 1.661-104.594  | 16.358 | 1.00 67.08 |
| ATOM<br>C | 772 | CD1 | ILE | X | 537 | 3.056-107.673  | 16.561 | 1.00 66.95 |
| ATOM<br>N | 773 | N   | ILE | X | 538 | 4.823-103.409  | 15.435 | 1.00 74.39 |



|      |     |     |     |   |     |                |        |      |        |
|------|-----|-----|-----|---|-----|----------------|--------|------|--------|
| ATOM | 774 | CA  | ILE | X | 538 | 5.138-102.053  | 15.032 | 1.00 | 75.57  |
| C    |     |     |     |   |     |                |        |      |        |
| ATOM | 775 | C   | ILE | X | 538 | 4.158-101.423  | 14.078 | 1.00 | 76.15  |
| C    |     |     |     |   |     |                |        |      |        |
| ATOM | 776 | O   | ILE | X | 538 | 3.892-100.236  | 14.154 | 1.00 | 75.68  |
| O    |     |     |     |   |     |                |        |      |        |
| ATOM | 777 | CB  | ILE | X | 538 | 6.550-101.967  | 14.456 | 1.00 | 76.23  |
| C    |     |     |     |   |     |                |        |      |        |
| ATOM | 778 | CG1 | ILE | X | 538 | 6.538-102.574  | 13.037 | 1.00 | 78.69  |
| C    |     |     |     |   |     |                |        |      |        |
| ATOM | 779 | CG2 | ILE | X | 538 | 7.589-102.575  | 15.420 | 1.00 | 75.27  |
| C    |     |     |     |   |     |                |        |      |        |
| ATOM | 780 | CD1 | ILE | X | 538 | 7.915-102.444  | 12.401 | 1.00 | 83.32  |
| C    |     |     |     |   |     |                |        |      |        |
| ATOM | 781 | N   | GLU | X | 539 | 3.649-102.213  | 13.154 | 1.00 | 78.34  |
| N    |     |     |     |   |     |                |        |      |        |
| ATOM | 782 | CA  | GLU | X | 539 | 2.716-101.674  | 12.202 | 1.00 | 81.80  |
| C    |     |     |     |   |     |                |        |      |        |
| ATOM | 783 | C   | GLU | X | 539 | 1.529-102.528  | 11.985 | 1.00 | 73.08  |
| C    |     |     |     |   |     |                |        |      |        |
| ATOM | 784 | O   | GLU | X | 539 | 1.671-103.656  | 11.585 | 1.00 | 68.43  |
| O    |     |     |     |   |     |                |        |      |        |
| ATOM | 785 | CB  | GLU | X | 539 | 3.429-101.559  | 10.877 | 1.00 | 90.43  |
| C    |     |     |     |   |     |                |        |      |        |
| ATOM | 786 | CG  | GLU | X | 539 | 2.792-100.640  | 9.862  | 1.00 | 95.52  |
| C    |     |     |     |   |     |                |        |      |        |
| ATOM | 787 | CD  | GLU | X | 539 | 3.765-100.277  | 8.758  | 1.00 | 106.32 |
| C    |     |     |     |   |     |                |        |      |        |
| ATOM | 788 | OE1 | GLU | X | 539 | 3.339 -99.661  | 7.769  | 1.00 | 119.53 |
| O    |     |     |     |   |     |                |        |      |        |
| ATOM | 789 | OE2 | GLU | X | 539 | 4.962-100.609  | 8.868  | 1.00 | 111.12 |
| O1-  |     |     |     |   |     |                |        |      |        |
| ATOM | 790 | N   | HIE | X | 540 | 0.354-102.004  | 12.251 | 1.00 | 69.39  |
| N    |     |     |     |   |     |                |        |      |        |
| ATOM | 791 | CA  | HIE | X | 540 | -0.834-102.751 | 11.941 | 1.00 | 69.09  |
| C    |     |     |     |   |     |                |        |      |        |
| ATOM | 792 | C   | HIE | X | 540 | -2.088-101.938 | 11.999 | 1.00 | 69.78  |
| C    |     |     |     |   |     |                |        |      |        |
| ATOM | 793 | O   | HIE | X | 540 | -2.286-101.167 | 12.902 | 1.00 | 68.81  |
| O    |     |     |     |   |     |                |        |      |        |
| ATOM | 794 | CB  | HIE | X | 540 | -0.942-103.995 | 12.744 | 1.00 | 68.96  |
| C    |     |     |     |   |     |                |        |      |        |
| ATOM | 795 | CG  | HIE | X | 540 | -2.135-104.793 | 12.391 | 1.00 | 71.25  |
| C    |     |     |     |   |     |                |        |      |        |
| ATOM | 796 | CD2 | HIE | X | 540 | -3.408-104.275 | 12.460 | 1.00 | 72.67  |
| C    |     |     |     |   |     |                |        |      |        |
| ATOM | 797 | ND1 | HIE | X | 540 | -2.260-106.060 | 11.947 | 1.00 | 72.24  |
| N    |     |     |     |   |     |                |        |      |        |
| ATOM | 798 | NE2 | HIE | X | 540 | -4.270-105.202 | 12.091 | 1.00 | 74.33  |
| N    |     |     |     |   |     |                |        |      |        |
| ATOM | 799 | CE1 | HIE | X | 540 | -3.598-106.293 | 11.771 | 1.00 | 73.74  |
| C    |     |     |     |   |     |                |        |      |        |
| ATOM | 800 | N   | LYS | X | 541 | -2.939-102.124 | 11.021 | 1.00 | 71.46  |
| N    |     |     |     |   |     |                |        |      |        |

|      |     |     |     |   |     |        |          |        |      |       |
|------|-----|-----|-----|---|-----|--------|----------|--------|------|-------|
| ATOM | 801 | CA  | LYS | X | 541 | -4.180 | -101.393 | 10.940 | 1.00 | 72.74 |
| C    |     |     |     |   |     |        |          |        |      |       |
| ATOM | 802 | C   | LYS | X | 541 | -5.238 | -101.749 | 11.943 | 1.00 | 73.19 |
| C    |     |     |     |   |     |        |          |        |      |       |
| ATOM | 803 | O   | LYS | X | 541 | -6.046 | -100.926 | 12.318 | 1.00 | 72.88 |
| O    |     |     |     |   |     |        |          |        |      |       |
| ATOM | 804 | CB  | LYS | X | 541 | -4.790 | -101.591 | 9.505  | 1.00 | 0.00  |
| C    |     |     |     |   |     |        |          |        |      |       |
| ATOM | 805 | CG  | LYS | X | 541 | -5.154 | -103.056 | 9.195  | 1.00 | 0.00  |
| C    |     |     |     |   |     |        |          |        |      |       |
| ATOM | 806 | CD  | LYS | X | 541 | -5.606 | -103.246 | 7.744  | 1.00 | 0.00  |
| C    |     |     |     |   |     |        |          |        |      |       |
| ATOM | 807 | CE  | LYS | X | 541 | -5.924 | -104.725 | 7.497  | 1.00 | 0.00  |
| C    |     |     |     |   |     |        |          |        |      |       |
| ATOM | 808 | NZ  | LYS | X | 541 | -6.272 | -104.982 | 6.091  | 1.00 | 0.00  |
| N1+  |     |     |     |   |     |        |          |        |      |       |
| ATOM | 809 | N   | SER | X | 542 | -5.276 | -103.001 | 12.335 | 1.00 | 73.93 |
| N    |     |     |     |   |     |        |          |        |      |       |
| ATOM | 810 | CA  | SER | X | 542 | -6.341 | -103.444 | 13.211 | 1.00 | 76.20 |
| C    |     |     |     |   |     |        |          |        |      |       |
| ATOM | 811 | C   | SER | X | 542 | -5.693 | -104.278 | 14.311 | 1.00 | 76.71 |
| C    |     |     |     |   |     |        |          |        |      |       |
| ATOM | 812 | O   | SER | X | 542 | -4.848 | -103.734 | 15.035 | 1.00 | 79.57 |
| O    |     |     |     |   |     |        |          |        |      |       |
| ATOM | 813 | CB  | SER | X | 542 | -7.368 | -104.249 | 12.428 | 1.00 | 78.09 |
| C    |     |     |     |   |     |        |          |        |      |       |
| ATOM | 814 | OG  | SER | X | 542 | -6.824 | -105.474 | 11.933 | 1.00 | 78.59 |
| O1-  |     |     |     |   |     |        |          |        |      |       |
| ATOM | 815 | N   | ILE | X | 543 | -5.933 | -105.604 | 14.329 | 1.00 | 76.29 |
| N    |     |     |     |   |     |        |          |        |      |       |
| ATOM | 816 | CA  | ILE | X | 543 | -5.742 | -106.428 | 15.543 | 1.00 | 76.23 |
| C    |     |     |     |   |     |        |          |        |      |       |
| ATOM | 817 | C   | ILE | X | 543 | -5.237 | -107.829 | 15.305 | 1.00 | 74.18 |
| C    |     |     |     |   |     |        |          |        |      |       |
| ATOM | 818 | O   | ILE | X | 543 | -5.982 | -108.784 | 15.625 | 1.00 | 73.45 |
| O    |     |     |     |   |     |        |          |        |      |       |
| ATOM | 819 | CB  | ILE | X | 543 | -7.081 | -106.706 | 16.305 | 1.00 | 79.64 |
| C    |     |     |     |   |     |        |          |        |      |       |
| ATOM | 820 | CG1 | ILE | X | 543 | -8.277 | -106.107 | 15.589 | 1.00 | 83.25 |
| C    |     |     |     |   |     |        |          |        |      |       |
| ATOM | 821 | CG2 | ILE | X | 543 | -7.019 | -106.220 | 17.761 | 1.00 | 80.23 |
| C    |     |     |     |   |     |        |          |        |      |       |
| ATOM | 822 | CD1 | ILE | X | 543 | -9.529 | -106.955 | 15.736 | 1.00 | 85.90 |
| C    |     |     |     |   |     |        |          |        |      |       |
| ATOM | 823 | N   | ILE | X | 544 | -3.924 | -107.972 | 15.141 | 1.00 | 72.53 |
| N    |     |     |     |   |     |        |          |        |      |       |
| ATOM | 824 | CA  | ILE | X | 544 | -3.326 | -109.348 | 15.011 | 1.00 | 73.00 |
| C    |     |     |     |   |     |        |          |        |      |       |
| ATOM | 825 | C   | ILE | X | 544 | -3.539 | -110.299 | 16.221 | 1.00 | 72.80 |
| C    |     |     |     |   |     |        |          |        |      |       |
| ATOM | 826 | O   | ILE | X | 544 | -3.328 | -109.916 | 17.357 | 1.00 | 72.02 |
| O    |     |     |     |   |     |        |          |        |      |       |
| ATOM | 827 | CB  | ILE | X | 544 | -1.806 | -109.380 | 14.761 | 1.00 | 72.38 |
| C    |     |     |     |   |     |        |          |        |      |       |

|      |     |     |     |   |     |        |          |        |      |        |
|------|-----|-----|-----|---|-----|--------|----------|--------|------|--------|
| ATOM | 828 | CG1 | ILE | X | 544 | -1.077 | -109.758 | 16.034 | 1.00 | 72.26  |
| C    |     |     |     |   |     |        |          |        |      |        |
| ATOM | 829 | CG2 | ILE | X | 544 | -1.296 | -108.072 | 14.222 | 1.00 | 71.96  |
| C    |     |     |     |   |     |        |          |        |      |        |
| ATOM | 830 | CD1 | ILE | X | 544 | 0.374  | -109.492 | 15.904 | 1.00 | 72.90  |
| C    |     |     |     |   |     |        |          |        |      |        |
| ATOM | 831 | N   | CYS | X | 545 | -3.728 | -111.588 | 15.930 | 1.00 | 73.41  |
| N    |     |     |     |   |     |        |          |        |      |        |
| ATOM | 832 | CA  | CYS | X | 545 | -4.574 | -112.444 | 16.747 | 1.00 | 74.30  |
| C    |     |     |     |   |     |        |          |        |      |        |
| ATOM | 833 | C   | CYS | X | 545 | -4.581 | -113.956 | 16.256 | 1.00 | 76.25  |
| C    |     |     |     |   |     |        |          |        |      |        |
| ATOM | 834 | O   | CYS | X | 545 | -4.620 | -114.228 | 15.066 | 1.00 | 75.81  |
| O    |     |     |     |   |     |        |          |        |      |        |
| ATOM | 835 | CB  | CYS | X | 545 | -5.939 | -111.742 | 16.826 | 1.00 | 74.42  |
| C    |     |     |     |   |     |        |          |        |      |        |
| ATOM | 836 | SG  | CYS | X | 545 | -7.379 | -112.757 | 16.775 | 1.00 | 76.36  |
| S    |     |     |     |   |     |        |          |        |      |        |
| ATOM | 837 | N   | PRO | X | 546 | -4.448 | -114.923 | 17.201 | 1.00 | 80.34  |
| N    |     |     |     |   |     |        |          |        |      |        |
| ATOM | 838 | CA  | PRO | X | 546 | -3.664 | -116.171 | 17.096 | 1.00 | 80.77  |
| C    |     |     |     |   |     |        |          |        |      |        |
| ATOM | 839 | C   | PRO | X | 546 | -4.145 | -117.003 | 15.990 | 1.00 | 81.18  |
| C    |     |     |     |   |     |        |          |        |      |        |
| ATOM | 840 | O   | PRO | X | 546 | -5.342 | -117.185 | 15.847 | 1.00 | 81.79  |
| O    |     |     |     |   |     |        |          |        |      |        |
| ATOM | 841 | CB  | PRO | X | 546 | -3.989 | -116.895 | 18.415 | 1.00 | 83.78  |
| C    |     |     |     |   |     |        |          |        |      |        |
| ATOM | 842 | CG  | PRO | X | 546 | -5.385 | -116.464 | 18.747 | 1.00 | 85.17  |
| C    |     |     |     |   |     |        |          |        |      |        |
| ATOM | 843 | CD  | PRO | X | 546 | -5.443 | -115.017 | 18.303 | 1.00 | 84.22  |
| C    |     |     |     |   |     |        |          |        |      |        |
| ATOM | 844 | N   | GLY | X | 547 | -3.242 | -117.572 | 15.244 | 1.00 | 83.00  |
| N    |     |     |     |   |     |        |          |        |      |        |
| ATOM | 845 | CA  | GLY | X | 547 | -3.607 | -118.030 | 13.914 | 1.00 | 89.17  |
| C    |     |     |     |   |     |        |          |        |      |        |
| ATOM | 846 | C   | GLY | X | 547 | -3.630 | -116.921 | 12.851 | 1.00 | 91.24  |
| C    |     |     |     |   |     |        |          |        |      |        |
| ATOM | 847 | O   | GLY | X | 547 | -4.169 | -117.109 | 11.745 | 1.00 | 88.00  |
| O    |     |     |     |   |     |        |          |        |      |        |
| ATOM | 848 | N   | TYR | X | 548 | -3.033 | -115.775 | 13.199 | 1.00 | 95.27  |
| N    |     |     |     |   |     |        |          |        |      |        |
| ATOM | 849 | CA  | TYR | X | 548 | -2.503 | -114.815 | 12.224 | 1.00 | 97.26  |
| C    |     |     |     |   |     |        |          |        |      |        |
| ATOM | 850 | C   | TYR | X | 548 | -1.421 | -115.497 | 11.446 | 1.00 | 94.25  |
| C    |     |     |     |   |     |        |          |        |      |        |
| ATOM | 851 | O   | TYR | X | 548 | -0.425 | -116.025 | 12.013 | 1.00 | 84.69  |
| O    |     |     |     |   |     |        |          |        |      |        |
| ATOM | 852 | CB  | TYR | X | 548 | -1.925 | -113.549 | 12.914 | 1.00 | 99.80  |
| C    |     |     |     |   |     |        |          |        |      |        |
| ATOM | 853 | CG  | TYR | X | 548 | -1.366 | -112.462 | 12.012 | 1.00 | 100.11 |
| C    |     |     |     |   |     |        |          |        |      |        |
| ATOM | 854 | CD1 | TYR | X | 548 | -2.236 | -111.731 | 11.183 | 1.00 | 106.63 |
| C    |     |     |     |   |     |        |          |        |      |        |

|      |     |     |     |   |     |                |        |      |        |
|------|-----|-----|-----|---|-----|----------------|--------|------|--------|
| ATOM | 855 | CD2 | TYR | X | 548 | 0.008-112.077  | 12.069 | 1.00 | 94.83  |
| C    |     |     |     |   |     |                |        |      |        |
| ATOM | 856 | CE1 | TYR | X | 548 | -1.769-110.697 | 10.370 | 1.00 | 108.10 |
| C    |     |     |     |   |     |                |        |      |        |
| ATOM | 857 | CE2 | TYR | X | 548 | 0.495-111.032  | 11.271 | 1.00 | 96.77  |
| C    |     |     |     |   |     |                |        |      |        |
| ATOM | 858 | CZ  | TYR | X | 548 | -0.403-110.334 | 10.416 | 1.00 | 104.23 |
| C    |     |     |     |   |     |                |        |      |        |
| ATOM | 859 | OH  | TYR | X | 548 | -0.003-109.314 | 9.546  | 1.00 | 93.78  |
| O    |     |     |     |   |     |                |        |      |        |
| ATOM | 860 | N   | ASN | X | 549 | -1.595-115.411 | 10.136 | 1.00 | 94.67  |
| N    |     |     |     |   |     |                |        |      |        |
| ATOM | 861 | CA  | ASN | X | 549 | -0.591-115.845 | 9.252  | 1.00 | 93.31  |
| C    |     |     |     |   |     |                |        |      |        |
| ATOM | 862 | C   | ASN | X | 549 | 0.300-114.740  | 8.741  | 1.00 | 89.22  |
| C    |     |     |     |   |     |                |        |      |        |
| ATOM | 863 | O   | ASN | X | 549 | -0.176-113.626 | 8.479  | 1.00 | 89.07  |
| O    |     |     |     |   |     |                |        |      |        |
| ATOM | 864 | CB  | ASN | X | 549 | -1.227-116.612 | 8.146  | 1.00 | 96.04  |
| C    |     |     |     |   |     |                |        |      |        |
| ATOM | 865 | CG  | ASN | X | 549 | -1.057-118.075 | 8.348  | 1.00 | 101.07 |
| C    |     |     |     |   |     |                |        |      |        |
| ATOM | 866 | OD1 | ASN | X | 549 | -1.960-118.716 | 8.876  | 1.00 | 114.23 |
| O    |     |     |     |   |     |                |        |      |        |
| ATOM | 867 | ND2 | ASN | X | 549 | 0.197-118.538  | 8.249  | 1.00 | 98.35  |
| N    |     |     |     |   |     |                |        |      |        |
| ATOM | 868 | N   | ALA | X | 550 | 1.606-115.029  | 8.667  | 1.00 | 83.55  |
| N    |     |     |     |   |     |                |        |      |        |
| ATOM | 869 | CA  | ALA | X | 550 | 2.591-114.077  | 8.120  | 1.00 | 81.08  |
| C    |     |     |     |   |     |                |        |      |        |
| ATOM | 870 | C   | ALA | X | 550 | 3.877-114.770  | 7.730  | 1.00 | 79.47  |
| C    |     |     |     |   |     |                |        |      |        |
| ATOM | 871 | O   | ALA | X | 550 | 4.078-115.917  | 8.050  | 1.00 | 78.69  |
| O    |     |     |     |   |     |                |        |      |        |
| ATOM | 872 | CB  | ALA | X | 550 | 2.883-112.961  | 9.121  | 1.00 | 80.55  |
| C    |     |     |     |   |     |                |        |      |        |
| ATOM | 873 | N   | VAL | X | 551 | 4.746-114.041  | 7.047  | 1.00 | 80.35  |
| N    |     |     |     |   |     |                |        |      |        |
| ATOM | 874 | CA  | VAL | X | 551 | 6.072-114.540  | 6.664  | 1.00 | 83.08  |
| C    |     |     |     |   |     |                |        |      |        |
| ATOM | 875 | C   | VAL | X | 551 | 7.024-114.205  | 7.772  | 1.00 | 79.37  |
| C    |     |     |     |   |     |                |        |      |        |
| ATOM | 876 | O   | VAL | X | 551 | 6.850-113.208  | 8.446  | 1.00 | 77.55  |
| O    |     |     |     |   |     |                |        |      |        |
| ATOM | 877 | CB  | VAL | X | 551 | 6.676-113.818  | 5.413  | 1.00 | 89.75  |
| C    |     |     |     |   |     |                |        |      |        |
| ATOM | 878 | CG1 | VAL | X | 551 | 7.878-114.595  | 4.871  | 1.00 | 91.53  |
| C    |     |     |     |   |     |                |        |      |        |
| ATOM | 879 | CG2 | VAL | X | 551 | 5.640-113.552  | 4.298  | 1.00 | 90.91  |
| C    |     |     |     |   |     |                |        |      |        |
| ATOM | 880 | N   | LEU | X | 552 | 8.110-114.944  | 7.846  | 1.00 | 76.40  |
| N    |     |     |     |   |     |                |        |      |        |
| ATOM | 881 | CA  | LEU | X | 552 | 8.977-114.862  | 8.971  | 1.00 | 75.44  |
| C    |     |     |     |   |     |                |        |      |        |

|           |     |     |           |                |        |      |        |
|-----------|-----|-----|-----------|----------------|--------|------|--------|
| ATOM<br>C | 882 | C   | LEU X 552 | 10.379-114.851 | 8.495  | 1.00 | 75.25  |
| ATOM<br>O | 883 | O   | LEU X 552 | 10.900-115.862 | 8.090  | 1.00 | 78.07  |
| ATOM<br>C | 884 | CB  | LEU X 552 | 8.744-116.068  | 9.902  | 1.00 | 75.63  |
| ATOM<br>C | 885 | CG  | LEU X 552 | 9.957-116.628  | 10.665 | 1.00 | 75.97  |
| ATOM<br>C | 886 | CD1 | LEU X 552 | 10.676-115.504 | 11.385 | 1.00 | 76.78  |
| ATOM<br>C | 887 | CD2 | LEU X 552 | 9.510-117.680  | 11.651 | 1.00 | 75.86  |
| ATOM<br>N | 888 | N   | HIE X 553 | 11.040-113.728 | 8.587  | 1.00 | 75.53  |
| ATOM<br>C | 889 | CA  | HIE X 553 | 12.412-113.683 | 8.096  | 1.00 | 76.40  |
| ATOM<br>C | 890 | C   | HIE X 553 | 13.388-113.852 | 9.198  | 1.00 | 75.37  |
| ATOM<br>O | 891 | O   | HIE X 553 | 13.698-112.889 | 9.870  | 1.00 | 73.57  |
| ATOM<br>C | 892 | CB  | HIE X 553 | 12.678-112.368 | 7.384  | 1.00 | 78.65  |
| ATOM<br>C | 893 | CG  | HIE X 553 | 11.818-112.151 | 6.198  | 1.00 | 78.92  |
| ATOM<br>N | 894 | ND1 | HIE X 553 | 12.336-111.823 | 4.967  | 1.00 | 78.93  |
| ATOM<br>C | 895 | CD2 | HIE X 553 | 10.471-112.226 | 6.049  | 1.00 | 79.14  |
| ATOM<br>C | 896 | CE1 | HIE X 553 | 11.343-111.725 | 4.101  | 1.00 | 81.69  |
| ATOM<br>N | 897 | NE2 | HIE X 553 | 10.206-111.995 | 4.726  | 1.00 | 81.29  |
| ATOM<br>N | 898 | N   | ILE X 554 | 13.983-115.014 | 9.294  | 1.00 | 77.67  |
| ATOM<br>C | 899 | CA  | ILE X 554 | 15.019-115.188 | 10.259 | 1.00 | 84.16  |
| ATOM<br>C | 900 | C   | ILE X 554 | 16.273-115.419 | 9.477  | 1.00 | 86.29  |
| ATOM<br>O | 901 | O   | ILE X 554 | 16.342-116.342 | 8.694  | 1.00 | 89.40  |
| ATOM<br>C | 902 | CB  | ILE X 554 | 14.774-116.432 | 11.064 | 1.00 | 90.51  |
| ATOM<br>C | 903 | CG1 | ILE X 554 | 13.359-116.387 | 11.592 | 1.00 | 99.78  |
| ATOM<br>C | 904 | CG2 | ILE X 554 | 15.784-116.528 | 12.179 | 1.00 | 90.62  |
| ATOM<br>C | 905 | CD1 | ILE X 554 | 13.110-117.388 | 12.679 | 1.00 | 114.38 |
| ATOM<br>N | 906 | N   | HIE X 555 | 17.255-114.560 | 9.657  | 1.00 | 89.39  |
| ATOM<br>C | 907 | CA  | HIE X 555 | 18.532-114.698 | 8.980  | 1.00 | 92.87  |
| ATOM<br>C | 908 | C   | HIE X 555 | 18.369-115.015 | 7.512  | 1.00 | 93.97  |

|           |     |     |     |   |     |                |        |            |
|-----------|-----|-----|-----|---|-----|----------------|--------|------------|
| ATOM<br>O | 909 | O   | HIE | X | 555 | 17.567-114.397 | 6.840  | 1.00101.30 |
| ATOM<br>C | 910 | CB  | HIE | X | 555 | 19.526-115.603 | 9.704  | 1.00 95.15 |
| ATOM<br>C | 911 | CG  | HIE | X | 555 | 19.047-116.992 | 9.952  | 1.00 97.46 |
| ATOM<br>C | 912 | CD2 | HIE | X | 555 | 19.799-118.094 | 9.625  | 1.00100.97 |
| ATOM<br>N | 913 | ND1 | HIE | X | 555 | 17.936-117.463 | 10.556 | 1.00 98.40 |
| ATOM<br>N | 914 | NE2 | HIE | X | 555 | 19.152-119.187 | 9.978  | 1.00104.00 |
| ATOM<br>C | 915 | CE1 | HIE | X | 555 | 18.015-118.831 | 10.541 | 1.00101.44 |
| ATOM<br>N | 916 | N   | THR | X | 556 | 19.100-116.002 | 7.022  | 1.00 92.24 |
| ATOM<br>C | 917 | CA  | THR | X | 556 | 18.980-116.355 | 5.633  | 1.00 88.37 |
| ATOM<br>C | 918 | C   | THR | X | 556 | 17.599-116.865 | 5.358  | 1.00 85.58 |
| ATOM<br>O | 919 | O   | THR | X | 556 | 17.019-116.547 | 4.352  | 1.00 90.88 |
| ATOM<br>C | 920 | CB  | THR | X | 556 | 19.950-117.453 | 5.217  | 1.00 91.28 |
| ATOM<br>O | 921 | OG1 | THR | X | 556 | 19.532-118.698 | 5.777  | 1.00 90.41 |
| ATOM<br>C | 922 | CG2 | THR | X | 556 | 21.341-117.132 | 5.657  | 1.00 91.94 |
| ATOM<br>N | 923 | N   | CYS | X | 557 | 17.058-117.653 | 6.260  | 1.00 82.04 |
| ATOM<br>C | 924 | CA  | CYS | X | 557 | 15.762-118.255 | 6.029  | 1.00 82.59 |
| ATOM<br>C | 925 | C   | CYS | X | 557 | 14.598-117.320 | 5.907  | 1.00 80.00 |
| ATOM<br>O | 926 | O   | CYS | X | 557 | 14.623-116.235 | 6.416  | 1.00 84.86 |
| ATOM<br>C | 927 | CB  | CYS | X | 557 | 15.455-119.259 | 7.108  | 1.00 84.04 |
| ATOM<br>S | 928 | SG  | CYS | X | 557 | 13.779-119.883 | 7.011  | 1.00 88.08 |
| ATOM<br>N | 929 | N   | ILE | X | 558 | 13.572-117.790 | 5.210  | 1.00 76.31 |
| ATOM<br>C | 930 | CA  | ILE | X | 558 | 12.377-117.037 | 5.005  | 1.00 75.03 |
| ATOM<br>C | 931 | C   | ILE | X | 558 | 11.184-117.976 | 4.884  | 1.00 75.21 |
| ATOM<br>O | 932 | O   | ILE | X | 558 | 10.823-118.388 | 3.780  | 1.00 75.03 |
| ATOM<br>C | 933 | CB  | ILE | X | 558 | 12.529-116.094 | 3.750  | 1.00 75.22 |
| ATOM<br>C | 934 | CG1 | ILE | X | 558 | 12.736-114.602 | 4.155  | 1.00 76.97 |
| ATOM<br>C | 935 | CG2 | ILE | X | 558 | 11.280-116.129 | 2.912  | 1.00 75.03 |

|             |     |     |     |   |     |                |        |      |        |
|-------------|-----|-----|-----|---|-----|----------------|--------|------|--------|
| ATOM<br>C   | 936 | CD1 | ILE | X | 558 | 14.163-114.048 | 4.064  | 1.00 | 78.45  |
| ATOM<br>N   | 937 | N   | GLU | X | 559 | 10.638-118.410 | 6.010  | 1.00 | 76.62  |
| ATOM<br>C   | 938 | CA  | GLU | X | 559 | 9.539-119.357  | 5.957  | 1.00 | 81.40  |
| ATOM<br>C   | 939 | C   | GLU | X | 559 | 8.263-118.795  | 6.470  | 1.00 | 81.63  |
| ATOM<br>O   | 940 | O   | GLU | X | 559 | 8.250-117.957  | 7.313  | 1.00 | 77.82  |
| ATOM<br>C   | 941 | CB  | GLU | X | 559 | 9.855-120.666  | 6.676  | 1.00 | 87.38  |
| ATOM<br>C   | 942 | CG  | GLU | X | 559 | 8.863-121.789  | 6.341  | 1.00 | 96.64  |
| ATOM<br>C   | 943 | CD  | GLU | X | 559 | 9.504-123.208  | 6.225  | 1.00 | 110.10 |
| ATOM<br>O   | 944 | OE1 | GLU | X | 559 | 10.427-123.416 | 5.364  | 1.00 | 122.65 |
| ATOM<br>O1- | 945 | OE2 | GLU | X | 559 | 9.021-124.138  | 6.934  | 1.00 | 105.97 |
| ATOM<br>N   | 946 | N   | GLU | X | 560 | 7.172-119.235  | 5.883  | 1.00 | 88.06  |
| ATOM<br>C   | 947 | CA  | GLU | X | 560 | 5.877-118.749  | 6.249  | 1.00 | 94.05  |
| ATOM<br>C   | 948 | C   | GLU | X | 560 | 5.607-119.304  | 7.609  | 1.00 | 90.18  |
| ATOM<br>O   | 949 | O   | GLU | X | 560 | 6.208-120.304  | 7.984  | 1.00 | 91.72  |
| ATOM<br>C   | 950 | CB  | GLU | X | 560 | 4.840-119.226  | 5.240  | 1.00 | 105.26 |
| ATOM<br>C   | 951 | CG  | GLU | X | 560 | 3.419-118.873  | 5.606  | 1.00 | 121.21 |
| ATOM<br>C   | 952 | CD  | GLU | X | 560 | 2.611-120.100  | 5.970  | 1.00 | 140.51 |
| ATOM<br>O   | 953 | OE1 | GLU | X | 560 | 2.378-120.926  | 5.052  | 1.00 | 169.28 |
| ATOM<br>O1- | 954 | OE2 | GLU | X | 560 | 2.197-120.232  | 7.156  | 1.00 | 141.42 |
| ATOM<br>N   | 955 | N   | VAL | X | 561 | 4.800-118.588  | 8.388  | 1.00 | 88.14  |
| ATOM<br>C   | 956 | CA  | VAL | X | 561 | 4.611-118.873  | 9.827  | 1.00 | 85.37  |
| ATOM<br>C   | 957 | C   | VAL | X | 561 | 3.216-118.427  | 10.325 | 1.00 | 88.33  |
| ATOM<br>O   | 958 | O   | VAL | X | 561 | 2.497-117.636  | 9.664  | 1.00 | 87.04  |
| ATOM<br>C   | 959 | CB  | VAL | X | 561 | 5.735-118.217  | 10.694 | 1.00 | 79.83  |
| ATOM<br>C   | 960 | CG1 | VAL | X | 561 | 5.676-116.701  | 10.647 | 1.00 | 77.23  |
| ATOM<br>C   | 961 | CG2 | VAL | X | 561 | 5.660-118.695  | 12.118 | 1.00 | 78.27  |
| ATOM<br>N   | 962 | N   | GLU | X | 562 | 2.833-118.995  | 11.463 | 1.00 | 91.50  |

|      |     |     |     |   |     |        |          |        |      |        |
|------|-----|-----|-----|---|-----|--------|----------|--------|------|--------|
| ATOM | 963 | CA  | GLU | X | 562 | 1.574  | -118.688 | 12.136 | 1.00 | 95.36  |
| C    |     |     |     |   |     |        |          |        |      |        |
| ATOM | 964 | C   | GLU | X | 562 | 1.878  | -118.483 | 13.604 | 1.00 | 92.25  |
| C    |     |     |     |   |     |        |          |        |      |        |
| ATOM | 965 | O   | GLU | X | 562 | 2.748  | -119.149 | 14.163 | 1.00 | 92.21  |
| O    |     |     |     |   |     |        |          |        |      |        |
| ATOM | 966 | CB  | GLU | X | 562 | 0.630  | -119.876 | 11.970 | 1.00 | 104.12 |
| C    |     |     |     |   |     |        |          |        |      |        |
| ATOM | 967 | CG  | GLU | X | 562 | -0.650 | -119.831 | 12.769 | 1.00 | 115.56 |
| C    |     |     |     |   |     |        |          |        |      |        |
| ATOM | 968 | CD  | GLU | X | 562 | -1.464 | -121.128 | 12.615 | 1.00 | 131.20 |
| C    |     |     |     |   |     |        |          |        |      |        |
| ATOM | 969 | OE1 | GLU | X | 562 | -1.307 | -121.826 | 11.573 | 1.00 | 125.28 |
| O    |     |     |     |   |     |        |          |        |      |        |
| ATOM | 970 | OE2 | GLU | X | 562 | -2.262 | -121.455 | 13.545 | 1.00 | 161.29 |
| O1-  |     |     |     |   |     |        |          |        |      |        |
| ATOM | 971 | N   | ILE | X | 563 | 1.234  | -117.522 | 14.232 | 1.00 | 88.92  |
| N    |     |     |     |   |     |        |          |        |      |        |
| ATOM | 972 | CA  | ILE | X | 563 | 1.416  | -117.389 | 15.653 | 1.00 | 84.99  |
| C    |     |     |     |   |     |        |          |        |      |        |
| ATOM | 973 | C   | ILE | X | 563 | 0.220  | -118.054 | 16.267 | 1.00 | 85.70  |
| C    |     |     |     |   |     |        |          |        |      |        |
| ATOM | 974 | O   | ILE | X | 563 | -0.923 | -117.680 | 16.028 | 1.00 | 81.09  |
| O    |     |     |     |   |     |        |          |        |      |        |
| ATOM | 975 | CB  | ILE | X | 563 | 1.591  | -115.948 | 16.098 | 1.00 | 83.46  |
| C    |     |     |     |   |     |        |          |        |      |        |
| ATOM | 976 | CG1 | ILE | X | 563 | 0.252  | -115.254 | 16.223 | 1.00 | 84.85  |
| C    |     |     |     |   |     |        |          |        |      |        |
| ATOM | 977 | CG2 | ILE | X | 563 | 2.474  | -115.184 | 15.126 | 1.00 | 82.75  |
| C    |     |     |     |   |     |        |          |        |      |        |
| ATOM | 978 | CD1 | ILE | X | 563 | 0.379  | -113.754 | 16.460 | 1.00 | 84.97  |
| C    |     |     |     |   |     |        |          |        |      |        |
| ATOM | 979 | N   | THR | X | 564 | 0.520  | -119.144 | 16.946 | 1.00 | 90.81  |
| N    |     |     |     |   |     |        |          |        |      |        |
| ATOM | 980 | CA  | THR | X | 564 | -0.387 | -120.259 | 17.085 | 1.00 | 96.60  |
| C    |     |     |     |   |     |        |          |        |      |        |
| ATOM | 981 | C   | THR | X | 564 | -1.274 | -120.093 | 18.271 | 1.00 | 100.43 |
| C    |     |     |     |   |     |        |          |        |      |        |
| ATOM | 982 | O   | THR | X | 564 | -2.471 | -120.377 | 18.169 | 1.00 | 116.23 |
| O    |     |     |     |   |     |        |          |        |      |        |
| ATOM | 983 | CB  | THR | X | 564 | 0.371  | -121.581 | 17.288 | 1.00 | 100.42 |
| C    |     |     |     |   |     |        |          |        |      |        |
| ATOM | 984 | OG1 | THR | X | 564 | 1.419  | -121.418 | 18.251 | 1.00 | 96.80  |
| O    |     |     |     |   |     |        |          |        |      |        |
| ATOM | 985 | CG2 | THR | X | 564 | 0.964  | -122.018 | 15.992 | 1.00 | 106.91 |
| C    |     |     |     |   |     |        |          |        |      |        |
| ATOM | 986 | N   | ALA | X | 565 | -0.666 | -119.846 | 19.444 | 1.00 | 96.09  |
| N    |     |     |     |   |     |        |          |        |      |        |
| ATOM | 987 | CA  | ALA | X | 565 | -1.099 | -118.728 | 20.290 | 1.00 | 91.40  |
| C    |     |     |     |   |     |        |          |        |      |        |
| ATOM | 988 | C   | ALA | X | 565 | 0.043  | -117.807 | 20.686 | 1.00 | 88.41  |
| C    |     |     |     |   |     |        |          |        |      |        |
| ATOM | 989 | O   | ALA | X | 565 | 1.248  | -118.095 | 20.494 | 1.00 | 82.10  |
| O    |     |     |     |   |     |        |          |        |      |        |



|      |      |     |     |   |     |        |          |        |      |        |
|------|------|-----|-----|---|-----|--------|----------|--------|------|--------|
| ATOM | 990  | CB  | ALA | X | 565 | -1.933 | -119.162 | 21.520 | 1.00 | 89.89  |
| C    |      |     |     |   |     |        |          |        |      |        |
| ATOM | 991  | N   | LEU | X | 566 | -0.407 | -116.592 | 20.966 | 1.00 | 89.27  |
| N    |      |     |     |   |     |        |          |        |      |        |
| ATOM | 992  | CA  | LEU | X | 566 | 0.252  | -115.658 | 21.846 | 1.00 | 86.41  |
| C    |      |     |     |   |     |        |          |        |      |        |
| ATOM | 993  | C   | LEU | X | 566 | -0.170 | -115.878 | 23.332 | 1.00 | 85.89  |
| C    |      |     |     |   |     |        |          |        |      |        |
| ATOM | 994  | O   | LEU | X | 566 | -1.268 | -116.434 | 23.630 | 1.00 | 81.74  |
| O    |      |     |     |   |     |        |          |        |      |        |
| ATOM | 995  | CB  | LEU | X | 566 | -0.030 | -114.225 | 21.376 | 1.00 | 83.05  |
| C    |      |     |     |   |     |        |          |        |      |        |
| ATOM | 996  | CG  | LEU | X | 566 | -1.470 | -113.909 | 20.956 | 1.00 | 83.22  |
| C    |      |     |     |   |     |        |          |        |      |        |
| ATOM | 997  | CD1 | LEU | X | 566 | -2.531 | -114.341 | 21.972 | 1.00 | 85.37  |
| C    |      |     |     |   |     |        |          |        |      |        |
| ATOM | 998  | CD2 | LEU | X | 566 | -1.581 | -112.437 | 20.736 | 1.00 | 82.15  |
| C    |      |     |     |   |     |        |          |        |      |        |
| ATOM | 999  | N   | ILE | X | 567 | 0.714  | -115.375 | 24.215 | 1.00 | 87.47  |
| N    |      |     |     |   |     |        |          |        |      |        |
| ATOM | 1000 | CA  | ILE | X | 567 | 1.022  | -115.948 | 25.561 | 1.00 | 89.81  |
| C    |      |     |     |   |     |        |          |        |      |        |
| ATOM | 1001 | C   | ILE | X | 567 | 0.726  | -114.919 | 26.652 | 1.00 | 91.07  |
| C    |      |     |     |   |     |        |          |        |      |        |
| ATOM | 1002 | O   | ILE | X | 567 | -0.249 | -115.018 | 27.375 | 1.00 | 90.36  |
| O    |      |     |     |   |     |        |          |        |      |        |
| ATOM | 1003 | CB  | ILE | X | 567 | 2.542  | -116.270 | 25.784 | 1.00 | 86.88  |
| C    |      |     |     |   |     |        |          |        |      |        |
| ATOM | 1004 | CG1 | ILE | X | 567 | 3.128  | -117.162 | 24.694 | 1.00 | 84.15  |
| C    |      |     |     |   |     |        |          |        |      |        |
| ATOM | 1005 | CG2 | ILE | X | 567 | 2.704  | -116.883 | 27.161 | 1.00 | 89.32  |
| C    |      |     |     |   |     |        |          |        |      |        |
| ATOM | 1006 | CD1 | ILE | X | 567 | 3.415  | -118.596 | 25.124 | 1.00 | 84.97  |
| C    |      |     |     |   |     |        |          |        |      |        |
| ATOM | 1007 | N   | CYS | X | 568 | 1.622  | -113.958 | 26.765 | 1.00 | 91.18  |
| N    |      |     |     |   |     |        |          |        |      |        |
| ATOM | 1008 | CA  | CYS | X | 568 | 1.554  | -112.999 | 27.773 | 1.00 | 93.95  |
| C    |      |     |     |   |     |        |          |        |      |        |
| ATOM | 1009 | C   | CYS | X | 568 | 1.887  | -111.707 | 27.165 | 1.00 | 89.40  |
| C    |      |     |     |   |     |        |          |        |      |        |
| ATOM | 1010 | O   | CYS | X | 568 | 3.003  | -111.493 | 26.746 | 1.00 | 89.91  |
| O    |      |     |     |   |     |        |          |        |      |        |
| ATOM | 1011 | CB  | CYS | X | 568 | 2.566  | -113.297 | 28.831 | 1.00 | 101.92 |
| C    |      |     |     |   |     |        |          |        |      |        |
| ATOM | 1012 | SG  | CYS | X | 568 | 1.937  | -112.872 | 30.450 | 1.00 | 141.60 |
| S    |      |     |     |   |     |        |          |        |      |        |
| ATOM | 1013 | N   | LEU | X | 569 | 0.950  | -110.793 | 27.226 | 1.00 | 86.35  |
| N    |      |     |     |   |     |        |          |        |      |        |
| ATOM | 1014 | CA  | LEU | X | 569 | 1.223  | -109.394 | 26.950 | 1.00 | 84.93  |
| C    |      |     |     |   |     |        |          |        |      |        |
| ATOM | 1015 | C   | LEU | X | 569 | 2.434  | -108.898 | 27.787 | 1.00 | 81.67  |
| C    |      |     |     |   |     |        |          |        |      |        |
| ATOM | 1016 | O   | LEU | X | 569 | 2.727  | -109.457 | 28.847 | 1.00 | 87.92  |
| O    |      |     |     |   |     |        |          |        |      |        |

|      |      |     |     |   |     |                |        |      |        |
|------|------|-----|-----|---|-----|----------------|--------|------|--------|
| ATOM | 1017 | CB  | LEU | X | 569 | -0.004-108.608 | 27.346 | 1.00 | 85.35  |
| C    |      |     |     |   |     |                |        |      |        |
| ATOM | 1018 | CG  | LEU | X | 569 | -0.265-107.514 | 26.347 | 1.00 | 88.21  |
| C    |      |     |     |   |     |                |        |      |        |
| ATOM | 1019 | CD1 | LEU | X | 569 | -0.972-108.046 | 25.074 | 1.00 | 86.80  |
| C    |      |     |     |   |     |                |        |      |        |
| ATOM | 1020 | CD2 | LEU | X | 569 | -1.000-106.390 | 27.086 | 1.00 | 88.97  |
| C    |      |     |     |   |     |                |        |      |        |
| ATOM | 1021 | N   | VAL | X | 570 | 3.087-107.806  | 27.391 | 1.00 | 76.95  |
| N    |      |     |     |   |     |                |        |      |        |
| ATOM | 1022 | CA  | VAL | X | 570 | 4.053-107.123  | 28.271 | 1.00 | 75.37  |
| C    |      |     |     |   |     |                |        |      |        |
| ATOM | 1023 | C   | VAL | X | 570 | 4.009-105.610  | 28.067 | 1.00 | 78.47  |
| C    |      |     |     |   |     |                |        |      |        |
| ATOM | 1024 | O   | VAL | X | 570 | 3.998-105.120  | 26.936 | 1.00 | 79.90  |
| O    |      |     |     |   |     |                |        |      |        |
| ATOM | 1025 | CB  | VAL | X | 570 | 5.476-107.747  | 28.221 | 1.00 | 72.94  |
| C    |      |     |     |   |     |                |        |      |        |
| ATOM | 1026 | CG1 | VAL | X | 570 | 5.812-108.508  | 26.928 | 1.00 | 71.30  |
| C    |      |     |     |   |     |                |        |      |        |
| ATOM | 1027 | CG2 | VAL | X | 570 | 6.619-106.760  | 28.500 | 1.00 | 71.69  |
| C    |      |     |     |   |     |                |        |      |        |
| ATOM | 1028 | N   | ASP | X | 571 | 3.971-104.867  | 29.173 | 1.00 | 82.45  |
| N    |      |     |     |   |     |                |        |      |        |
| ATOM | 1029 | CA  | ASP | X | 571 | 4.013-103.408  | 29.166 | 1.00 | 86.41  |
| C    |      |     |     |   |     |                |        |      |        |
| ATOM | 1030 | C   | ASP | X | 571 | 5.403-102.903  | 28.746 | 1.00 | 85.06  |
| C    |      |     |     |   |     |                |        |      |        |
| ATOM | 1031 | O   | ASP | X | 571 | 6.452-103.307  | 29.259 | 1.00 | 79.42  |
| O    |      |     |     |   |     |                |        |      |        |
| ATOM | 1032 | CB  | ASP | X | 571 | 3.555-102.846  | 30.523 | 1.00 | 93.59  |
| C    |      |     |     |   |     |                |        |      |        |
| ATOM | 1033 | CG  | ASP | X | 571 | 3.858-101.351  | 30.684 | 1.00 | 104.33 |
| C    |      |     |     |   |     |                |        |      |        |
| ATOM | 1034 | OD1 | ASP | X | 571 | 3.778-100.613  | 29.672 | 1.00 | 108.65 |
| O    |      |     |     |   |     |                |        |      |        |
| ATOM | 1035 | OD2 | ASP | X | 571 | 4.311-100.960  | 31.783 | 1.00 | 115.26 |
| O1-  |      |     |     |   |     |                |        |      |        |
| ATOM | 1036 | N   | LYS | X | 572 | 5.398-101.944  | 27.818 | 1.00 | 85.84  |
| N    |      |     |     |   |     |                |        |      |        |
| ATOM | 1037 | CA  | LYS | X | 572 | 6.602-101.275  | 27.333 | 1.00 | 85.42  |
| C    |      |     |     |   |     |                |        |      |        |
| ATOM | 1038 | C   | LYS | X | 572 | 7.262-100.428  | 28.412 | 1.00 | 83.37  |
| C    |      |     |     |   |     |                |        |      |        |
| ATOM | 1039 | O   | LYS | X | 572 | 8.480-100.286  | 28.375 | 1.00 | 81.12  |
| O    |      |     |     |   |     |                |        |      |        |
| ATOM | 1040 | CB  | LYS | X | 572 | 6.259-100.397  | 26.123 | 1.00 | 85.68  |
| C    |      |     |     |   |     |                |        |      |        |
| ATOM | 1041 | CG  | LYS | X | 572 | 5.967-101.242  | 24.883 | 1.00 | 85.85  |
| C    |      |     |     |   |     |                |        |      |        |
| ATOM | 1042 | CD  | LYS | X | 572 | 5.850-100.376  | 23.625 | 1.00 | 91.04  |
| C    |      |     |     |   |     |                |        |      |        |
| ATOM | 1043 | CE  | LYS | X | 572 | 5.848-101.267  | 22.378 | 1.00 | 95.95  |
| C    |      |     |     |   |     |                |        |      |        |

|             |      |    |     |   |     |               |        |      |        |
|-------------|------|----|-----|---|-----|---------------|--------|------|--------|
| ATOM<br>N1+ | 1044 | NZ | LYS | X | 572 | 5.745-100.455 | 21.147 | 1.00 | 99.37  |
| ATOM<br>N   | 1045 | N  | LYS | X | 573 | 6.503 -99.813 | 29.318 | 1.00 | 83.47  |
| ATOM<br>C   | 1046 | CA | LYS | X | 573 | 7.024 -98.833 | 30.279 | 1.00 | 86.06  |
| ATOM<br>C   | 1047 | C  | LYS | X | 573 | 7.906 -99.463 | 31.354 | 1.00 | 82.54  |
| ATOM<br>O   | 1048 | O  | LYS | X | 573 | 8.922 -98.879 | 31.745 | 1.00 | 80.90  |
| ATOM<br>C   | 1049 | CB | LYS | X | 573 | 5.832 -98.101 | 30.920 | 1.00 | 93.19  |
| ATOM<br>C   | 1050 | CG | LYS | X | 573 | 5.941 -96.614 | 30.623 | 1.00 | 101.84 |
| ATOM<br>C   | 1051 | CD | LYS | X | 573 | 4.883 -95.812 | 31.380 | 1.00 | 113.45 |
| ATOM<br>C   | 1052 | CE | LYS | X | 573 | 5.354 -94.369 | 31.313 | 1.00 | 122.27 |
| ATOM<br>N1+ | 1053 | NZ | LYS | X | 573 | 5.716 -93.874 | 32.691 | 1.00 | 127.89 |
| ATOM<br>N   | 1054 | N  | SER | X | 574 | 7.490-100.627 | 31.830 | 1.00 | 79.70  |
| ATOM<br>C   | 1055 | CA | SER | X | 574 | 8.046-101.307 | 32.997 | 1.00 | 77.70  |
| ATOM<br>C   | 1056 | C  | SER | X | 574 | 8.879-102.542 | 32.639 | 1.00 | 77.57  |
| ATOM<br>O   | 1057 | O  | SER | X | 574 | 9.948-102.737 | 33.209 | 1.00 | 76.94  |
| ATOM<br>C   | 1058 | CB | SER | X | 574 | 6.875-101.693 | 33.906 | 1.00 | 76.97  |
| ATOM<br>O   | 1059 | OG | SER | X | 574 | 5.964-102.450 | 33.143 | 1.00 | 74.89  |
| ATOM<br>N   | 1060 | N  | GLY | X | 575 | 8.429-103.372 | 31.695 | 1.00 | 77.50  |
| ATOM<br>C   | 1061 | CA | GLY | X | 575 | 8.859-104.775 | 31.600 | 1.00 | 76.99  |
| ATOM<br>C   | 1062 | C  | GLY | X | 575 | 7.956-105.720 | 32.391 | 1.00 | 77.09  |
| ATOM<br>O   | 1063 | O  | GLY | X | 575 | 8.254-106.911 | 32.510 | 1.00 | 73.60  |
| ATOM<br>N   | 1064 | N  | GLU | X | 576 | 6.826-105.211 | 32.885 | 1.00 | 79.57  |
| ATOM<br>C   | 1065 | CA | GLU | X | 576 | 5.759-106.003 | 33.472 | 1.00 | 85.60  |
| ATOM<br>C   | 1066 | C  | GLU | X | 576 | 5.220-106.960 | 32.412 | 1.00 | 86.07  |
| ATOM<br>O   | 1067 | O  | GLU | X | 576 | 4.600-106.566 | 31.422 | 1.00 | 86.76  |
| ATOM<br>C   | 1068 | CB | GLU | X | 576 | 4.683-105.079 | 34.068 | 1.00 | 91.44  |
| ATOM<br>C   | 1069 | CG | GLU | X | 576 | 3.471-105.831 | 34.632 | 1.00 | 96.83  |
| ATOM<br>C   | 1070 | CD | GLU | X | 576 | 2.657-105.048 | 35.655 | 1.00 | 105.09 |

|      |      |     |     |   |     |                |        |            |
|------|------|-----|-----|---|-----|----------------|--------|------------|
| ATOM | 1071 | OE1 | GLU | X | 576 | 1.543-105.535  | 35.956 | 1.00108.78 |
| O    |      |     |     |   |     |                |        |            |
| ATOM | 1072 | OE2 | GLU | X | 576 | 3.111-103.970  | 36.158 | 1.00116.28 |
| O1-  |      |     |     |   |     |                |        |            |
| ATOM | 1073 | N   | LYS | X | 577 | 5.472-108.250  | 32.645 | 1.00 88.13 |
| N    |      |     |     |   |     |                |        |            |
| ATOM | 1074 | CA  | LYS | X | 577 | 4.661-109.316  | 32.065 | 1.00 90.73 |
| C    |      |     |     |   |     |                |        |            |
| ATOM | 1075 | C   | LYS | X | 577 | 3.200-109.148  | 32.483 | 1.00 89.17 |
| C    |      |     |     |   |     |                |        |            |
| ATOM | 1076 | O   | LYS | X | 577 | 2.871-108.359  | 33.339 | 1.00 86.72 |
| O    |      |     |     |   |     |                |        |            |
| ATOM | 1077 | CB  | LYS | X | 577 | 5.175-110.683  | 32.515 | 1.00 97.93 |
| C    |      |     |     |   |     |                |        |            |
| ATOM | 1078 | CG  | LYS | X | 577 | 5.937-111.440  | 31.427 | 1.00103.29 |
| C    |      |     |     |   |     |                |        |            |
| ATOM | 1079 | CD  | LYS | X | 577 | 7.350-110.886  | 31.190 | 1.00109.15 |
| C    |      |     |     |   |     |                |        |            |
| ATOM | 1080 | CE  | LYS | X | 577 | 8.065-111.630  | 30.052 | 1.00113.69 |
| C    |      |     |     |   |     |                |        |            |
| ATOM | 1081 | NZ  | LYS | X | 577 | 8.125-113.099  | 30.280 | 1.00111.84 |
| N1+  |      |     |     |   |     |                |        |            |
| ATOM | 1082 | N   | SER | X | 578 | 2.322-109.868  | 31.827 | 1.00 90.26 |
| N    |      |     |     |   |     |                |        |            |
| ATOM | 1083 | CA  | SER | X | 578 | 0.950-109.580  | 31.993 | 1.00 97.35 |
| C    |      |     |     |   |     |                |        |            |
| ATOM | 1084 | C   | SER | X | 578 | 0.288-110.628  | 32.774 | 1.00102.11 |
| C    |      |     |     |   |     |                |        |            |
| ATOM | 1085 | O   | SER | X | 578 | 0.762-111.744  | 32.880 | 1.00102.87 |
| O    |      |     |     |   |     |                |        |            |
| ATOM | 1086 | CB  | SER | X | 578 | 0.249-109.485  | 30.677 | 1.00105.37 |
| C    |      |     |     |   |     |                |        |            |
| ATOM | 1087 | OG  | SER | X | 578 | -1.105-109.182 | 30.927 | 1.00122.65 |
| O    |      |     |     |   |     |                |        |            |
| ATOM | 1088 | N   | LYS | X | 579 | -0.920-110.320 | 33.181 | 1.00113.62 |
| N    |      |     |     |   |     |                |        |            |
| ATOM | 1089 | CA  | LYS | X | 579 | -1.535-111.007 | 34.289 | 1.00124.64 |
| C    |      |     |     |   |     |                |        |            |
| ATOM | 1090 | C   | LYS | X | 579 | -2.283-112.127 | 33.712 | 1.00114.47 |
| C    |      |     |     |   |     |                |        |            |
| ATOM | 1091 | O   | LYS | X | 579 | -1.900-113.286 | 33.830 | 1.00109.22 |
| O    |      |     |     |   |     |                |        |            |
| ATOM | 1092 | CB  | LYS | X | 579 | -2.481-110.044 | 35.000 | 1.00144.46 |
| C    |      |     |     |   |     |                |        |            |
| ATOM | 1093 | CG  | LYS | X | 579 | -1.809-108.711 | 35.376 | 1.00159.54 |
| C    |      |     |     |   |     |                |        |            |
| ATOM | 1094 | CD  | LYS | X | 579 | -1.713-107.730 | 34.211 | 1.00153.01 |
| C    |      |     |     |   |     |                |        |            |
| ATOM | 1095 | CE  | LYS | X | 579 | -2.098-106.339 | 34.663 | 1.00163.77 |
| C    |      |     |     |   |     |                |        |            |
| ATOM | 1096 | NZ  | LYS | X | 579 | -3.557-106.125 | 34.432 | 1.00177.32 |
| N1+  |      |     |     |   |     |                |        |            |
| ATOM | 1097 | N   | THR | X | 580 | -3.194-111.728 | 32.856 | 1.00114.54 |
| N    |      |     |     |   |     |                |        |            |

|      |      |     |     |   |     |                |        |            |
|------|------|-----|-----|---|-----|----------------|--------|------------|
| ATOM | 1098 | CA  | THR | X | 580 | -3.903-112.640 | 32.027 | 1.00116.59 |
| C    |      |     |     |   |     |                |        |            |
| ATOM | 1099 | C   | THR | X | 580 | -3.123-112.938 | 30.713 | 1.00110.31 |
| C    |      |     |     |   |     |                |        |            |
| ATOM | 1100 | O   | THR | X | 580 | -2.069-112.350 | 30.426 | 1.00100.69 |
| O    |      |     |     |   |     |                |        |            |
| ATOM | 1101 | CB  | THR | X | 580 | -5.332-112.084 | 31.741 | 1.00115.97 |
| C    |      |     |     |   |     |                |        |            |
| ATOM | 1102 | OG1 | THR | X | 580 | -5.385-110.677 | 32.062 | 1.00107.71 |
| O    |      |     |     |   |     |                |        |            |
| ATOM | 1103 | CG2 | THR | X | 580 | -6.412-112.880 | 32.586 | 1.00113.43 |
| C    |      |     |     |   |     |                |        |            |
| ATOM | 1104 | N   | ARG | X | 581 | -3.619-113.949 | 29.998 | 1.00110.46 |
| N    |      |     |     |   |     |                |        |            |
| ATOM | 1105 | CA  | ARG | X | 581 | -3.384-114.142 | 28.553 | 1.00101.57 |
| C    |      |     |     |   |     |                |        |            |
| ATOM | 1106 | C   | ARG | X | 581 | -4.009-113.013 | 27.865 | 1.00 95.09 |
| C    |      |     |     |   |     |                |        |            |
| ATOM | 1107 | O   | ARG | X | 581 | -5.015-112.504 | 28.348 | 1.00 88.53 |
| O    |      |     |     |   |     |                |        |            |
| ATOM | 1108 | CB  | ARG | X | 581 | -4.118-115.402 | 28.045 | 1.00101.58 |
| C    |      |     |     |   |     |                |        |            |
| ATOM | 1109 | CG  | ARG | X | 581 | -3.270-116.466 | 27.372 | 1.00101.94 |
| C    |      |     |     |   |     |                |        |            |
| ATOM | 1110 | CD  | ARG | X | 581 | -4.043-117.795 | 27.222 | 1.00105.93 |
| C    |      |     |     |   |     |                |        |            |
| ATOM | 1111 | NE  | ARG | X | 581 | -3.183-118.955 | 27.374 | 1.00114.10 |
| N    |      |     |     |   |     |                |        |            |
| ATOM | 1112 | CZ  | ARG | X | 581 | -1.948-119.063 | 26.857 | 1.00128.84 |
| C    |      |     |     |   |     |                |        |            |
| ATOM | 1113 | NH1 | ARG | X | 581 | -1.441-118.126 | 26.054 | 1.00131.29 |
| N    |      |     |     |   |     |                |        |            |
| ATOM | 1114 | NH2 | ARG | X | 581 | -1.214-120.148 | 27.105 | 1.00144.90 |
| N1+  |      |     |     |   |     |                |        |            |
| ATOM | 1115 | N   | PRO | X | 582 | -3.529-112.725 | 26.656 | 1.00 94.63 |
| N    |      |     |     |   |     |                |        |            |
| ATOM | 1116 | CA  | PRO | X | 582 | -4.239-111.733 | 25.892 | 1.00 93.03 |
| C    |      |     |     |   |     |                |        |            |
| ATOM | 1117 | C   | PRO | X | 582 | -4.833-112.370 | 24.679 | 1.00 86.79 |
| C    |      |     |     |   |     |                |        |            |
| ATOM | 1118 | O   | PRO | X | 582 | -4.197-113.221 | 24.062 | 1.00 84.21 |
| O    |      |     |     |   |     |                |        |            |
| ATOM | 1119 | CB  | PRO | X | 582 | -3.143-110.745 | 25.506 | 1.00 97.79 |
| C    |      |     |     |   |     |                |        |            |
| ATOM | 1120 | CG  | PRO | X | 582 | -1.831-111.496 | 25.695 | 1.00101.74 |
| C    |      |     |     |   |     |                |        |            |
| ATOM | 1121 | CD  | PRO | X | 582 | -2.152-112.886 | 26.154 | 1.00 97.69 |
| C    |      |     |     |   |     |                |        |            |
| ATOM | 1122 | N   | ARG | X | 583 | -6.078-112.014 | 24.386 | 1.00 83.93 |
| N    |      |     |     |   |     |                |        |            |
| ATOM | 1123 | CA  | ARG | X | 583 | -6.791-112.530 | 23.204 | 1.00 82.07 |
| C    |      |     |     |   |     |                |        |            |
| ATOM | 1124 | C   | ARG | X | 583 | -6.128-112.095 | 21.805 | 1.00 78.34 |
| C    |      |     |     |   |     |                |        |            |

|      |      |     |     |   |     |                |        |      |       |
|------|------|-----|-----|---|-----|----------------|--------|------|-------|
| ATOM | 1125 | O   | ARG | X | 583 | -6.431-112.688 | 20.749 | 1.00 | 76.41 |
| O    |      |     |     |   |     |                |        |      |       |
| ATOM | 1126 | CB  | ARG | X | 583 | -8.268-112.089 | 23.284 | 1.00 | 0.00  |
| C    |      |     |     |   |     |                |        |      |       |
| ATOM | 1127 | CG  | ARG | X | 583 | -8.974-112.419 | 24.611 | 1.00 | 0.00  |
| C    |      |     |     |   |     |                |        |      |       |
| ATOM | 1128 | CD  | ARG | X | 583 | -8.927-113.911 | 24.975 | 1.00 | 0.00  |
| C    |      |     |     |   |     |                |        |      |       |
| ATOM | 1129 | NE  | ARG | X | 583 | -9.605-114.178 | 26.252 | 1.00 | 0.00  |
| N    |      |     |     |   |     |                |        |      |       |
| ATOM | 1130 | CZ  | ARG | X | 583 | -9.079-113.991 | 27.478 | 1.00 | 0.00  |
| C    |      |     |     |   |     |                |        |      |       |
| ATOM | 1131 | NH1 | ARG | X | 583 | -7.833-113.520 | 27.646 | 1.00 | 0.00  |
| N    |      |     |     |   |     |                |        |      |       |
| ATOM | 1132 | NH2 | ARG | X | 583 | -9.817-114.281 | 28.559 | 1.00 | 0.00  |
| N1+  |      |     |     |   |     |                |        |      |       |
| ATOM | 1133 | N   | PHE | X | 584 | -5.171-111.147 | 21.850 | 1.00 | 74.41 |
| N    |      |     |     |   |     |                |        |      |       |
| ATOM | 1134 | CA  | PHE | X | 584 | -4.603-110.527 | 20.655 | 1.00 | 71.41 |
| C    |      |     |     |   |     |                |        |      |       |
| ATOM | 1135 | C   | PHE | X | 584 | -3.732-109.309 | 20.942 | 1.00 | 70.29 |
| C    |      |     |     |   |     |                |        |      |       |
| ATOM | 1136 | O   | PHE | X | 584 | -3.867-108.665 | 21.944 | 1.00 | 71.90 |
| O    |      |     |     |   |     |                |        |      |       |
| ATOM | 1137 | CB  | PHE | X | 584 | -5.712-110.034 | 19.804 | 1.00 | 71.04 |
| C    |      |     |     |   |     |                |        |      |       |
| ATOM | 1138 | CG  | PHE | X | 584 | -6.575-109.075 | 20.485 | 1.00 | 70.36 |
| C    |      |     |     |   |     |                |        |      |       |
| ATOM | 1139 | CD1 | PHE | X | 584 | -6.190-107.749 | 20.602 | 1.00 | 69.38 |
| C    |      |     |     |   |     |                |        |      |       |
| ATOM | 1140 | CD2 | PHE | X | 584 | -7.778-109.471 | 20.983 | 1.00 | 71.27 |
| C    |      |     |     |   |     |                |        |      |       |
| ATOM | 1141 | CE1 | PHE | X | 584 | -7.013-106.827 | 21.181 | 1.00 | 70.08 |
| C    |      |     |     |   |     |                |        |      |       |
| ATOM | 1142 | CE2 | PHE | X | 584 | -8.613-108.544 | 21.556 | 1.00 | 72.45 |
| C    |      |     |     |   |     |                |        |      |       |
| ATOM | 1143 | CZ  | PHE | X | 584 | -8.224-107.216 | 21.666 | 1.00 | 71.43 |
| C    |      |     |     |   |     |                |        |      |       |
| ATOM | 1144 | N   | VAL | X | 585 | -2.954-108.893 | 19.990 | 1.00 | 68.64 |
| N    |      |     |     |   |     |                |        |      |       |
| ATOM | 1145 | CA  | VAL | X | 585 | -2.083-107.808 | 20.244 | 1.00 | 69.44 |
| C    |      |     |     |   |     |                |        |      |       |
| ATOM | 1146 | C   | VAL | X | 585 | -2.337-106.825 | 19.147 | 1.00 | 72.06 |
| C    |      |     |     |   |     |                |        |      |       |
| ATOM | 1147 | O   | VAL | X | 585 | -2.132-107.207 | 17.993 | 1.00 | 74.54 |
| O    |      |     |     |   |     |                |        |      |       |
| ATOM | 1148 | CB  | VAL | X | 585 | -0.612-108.283 | 20.124 | 1.00 | 68.48 |
| C    |      |     |     |   |     |                |        |      |       |
| ATOM | 1149 | CG1 | VAL | X | 585 | -0.356-109.721 | 19.905 | 1.00 | 68.35 |
| C    |      |     |     |   |     |                |        |      |       |
| ATOM | 1150 | CG2 | VAL | X | 585 | 0.453-107.292  | 19.801 | 1.00 | 68.24 |
| C    |      |     |     |   |     |                |        |      |       |
| ATOM | 1151 | N   | LYS | X | 586 | -2.597-105.537 | 19.474 | 1.00 | 74.69 |
| N    |      |     |     |   |     |                |        |      |       |

|      |      |     |     |   |     |        |          |        |      |        |
|------|------|-----|-----|---|-----|--------|----------|--------|------|--------|
| ATOM | 1152 | CA  | LYS | X | 586 | -2.608 | -104.404 | 18.459 | 1.00 | 76.43  |
| C    |      |     |     |   |     |        |          |        |      |        |
| ATOM | 1153 | C   | LYS | X | 586 | -1.218 | -103.742 | 18.190 | 1.00 | 73.93  |
| C    |      |     |     |   |     |        |          |        |      |        |
| ATOM | 1154 | O   | LYS | X | 586 | -0.160 | -104.291 | 18.484 | 1.00 | 70.24  |
| O    |      |     |     |   |     |        |          |        |      |        |
| ATOM | 1155 | CB  | LYS | X | 586 | -3.577 | -103.302 | 18.876 | 1.00 | 81.59  |
| C    |      |     |     |   |     |        |          |        |      |        |
| ATOM | 1156 | CG  | LYS | X | 586 | -4.882 | -103.781 | 19.488 | 1.00 | 89.56  |
| C    |      |     |     |   |     |        |          |        |      |        |
| ATOM | 1157 | CD  | LYS | X | 586 | -5.315 | -102.915 | 20.706 | 1.00 | 101.48 |
| C    |      |     |     |   |     |        |          |        |      |        |
| ATOM | 1158 | CE  | LYS | X | 586 | -6.231 | -101.729 | 20.341 | 1.00 | 110.24 |
| C    |      |     |     |   |     |        |          |        |      |        |
| ATOM | 1159 | NZ  | LYS | X | 586 | -7.586 | -102.152 | 19.838 | 1.00 | 118.13 |
| N1+  |      |     |     |   |     |        |          |        |      |        |
| ATOM | 1160 | N   | GLN | X | 587 | -1.225 | -102.556 | 17.610 | 1.00 | 74.42  |
| N    |      |     |     |   |     |        |          |        |      |        |
| ATOM | 1161 | CA  | GLN | X | 587 | 0.048  | -101.979 | 17.151 | 1.00 | 74.60  |
| C    |      |     |     |   |     |        |          |        |      |        |
| ATOM | 1162 | C   | GLN | X | 587 | 0.882  | -101.677 | 18.344 | 1.00 | 77.05  |
| C    |      |     |     |   |     |        |          |        |      |        |
| ATOM | 1163 | O   | GLN | X | 587 | 0.410  | -101.756 | 19.455 | 1.00 | 74.24  |
| O    |      |     |     |   |     |        |          |        |      |        |
| ATOM | 1164 | CB  | GLN | X | 587 | -0.183 | -100.705 | 16.281 | 1.00 | 73.79  |
| C    |      |     |     |   |     |        |          |        |      |        |
| ATOM | 1165 | CG  | GLN | X | 587 | 0.933  | -100.311 | 15.279 | 1.00 | 71.09  |
| C    |      |     |     |   |     |        |          |        |      |        |
| ATOM | 1166 | CD  | GLN | X | 587 | 0.395  | -99.366  | 14.178 | 1.00 | 69.89  |
| C    |      |     |     |   |     |        |          |        |      |        |
| ATOM | 1167 | OE1 | GLN | X | 587 | -0.291 | -99.793  | 13.246 | 1.00 | 68.35  |
| O    |      |     |     |   |     |        |          |        |      |        |
| ATOM | 1168 | NE2 | GLN | X | 587 | 0.633  | -98.090  | 14.342 | 1.00 | 69.44  |
| N    |      |     |     |   |     |        |          |        |      |        |
| ATOM | 1169 | N   | ASP | X | 588 | 2.077  | -101.179 | 18.113 | 1.00 | 84.86  |
| N    |      |     |     |   |     |        |          |        |      |        |
| ATOM | 1170 | CA  | ASP | X | 588 | 2.678  | -100.228 | 19.069 | 1.00 | 95.40  |
| C    |      |     |     |   |     |        |          |        |      |        |
| ATOM | 1171 | C   | ASP | X | 588 | 2.733  | -100.802 | 20.491 | 1.00 | 88.61  |
| C    |      |     |     |   |     |        |          |        |      |        |
| ATOM | 1172 | O   | ASP | X | 588 | 2.862  | -100.004 | 21.456 | 1.00 | 83.56  |
| O    |      |     |     |   |     |        |          |        |      |        |
| ATOM | 1173 | CB  | ASP | X | 588 | 1.844  | -98.907  | 19.122 | 1.00 | 113.99 |
| C    |      |     |     |   |     |        |          |        |      |        |
| ATOM | 1174 | CG  | ASP | X | 588 | 2.560  | -97.700  | 18.459 | 1.00 | 135.12 |
| C    |      |     |     |   |     |        |          |        |      |        |
| ATOM | 1175 | OD1 | ASP | X | 588 | 3.710  | -97.414  | 18.893 | 1.00 | 143.71 |
| O    |      |     |     |   |     |        |          |        |      |        |
| ATOM | 1176 | OD2 | ASP | X | 588 | 1.929  | -96.992  | 17.580 | 1.00 | 151.78 |
| O1-  |      |     |     |   |     |        |          |        |      |        |
| ATOM | 1177 | N   | GLN | X | 589 | 2.809  | -102.164 | 20.565 | 1.00 | 82.57  |
| N    |      |     |     |   |     |        |          |        |      |        |
| ATOM | 1178 | CA  | GLN | X | 589 | 2.436  | -103.043 | 21.739 | 1.00 | 77.34  |
| C    |      |     |     |   |     |        |          |        |      |        |

|      |      |     |     |   |     |                |        |      |       |
|------|------|-----|-----|---|-----|----------------|--------|------|-------|
| ATOM | 1179 | C   | GLN | X | 589 | 3.387-104.258  | 21.713 | 1.00 | 74.15 |
| C    |      |     |     |   |     |                |        |      |       |
| ATOM | 1180 | O   | GLN | X | 589 | 4.104-104.472  | 20.731 | 1.00 | 72.78 |
| O    |      |     |     |   |     |                |        |      |       |
| ATOM | 1181 | CB  | GLN | X | 589 | 0.982-103.438  | 21.622 | 1.00 | 77.47 |
| C    |      |     |     |   |     |                |        |      |       |
| ATOM | 1182 | CG  | GLN | X | 589 | 0.394-104.289  | 22.741 | 1.00 | 78.96 |
| C    |      |     |     |   |     |                |        |      |       |
| ATOM | 1183 | CD  | GLN | X | 589 | -1.119-104.468 | 22.543 | 1.00 | 82.47 |
| C    |      |     |     |   |     |                |        |      |       |
| ATOM | 1184 | OE1 | GLN | X | 589 | -1.639-104.118 | 21.499 | 1.00 | 91.27 |
| O    |      |     |     |   |     |                |        |      |       |
| ATOM | 1185 | NE2 | GLN | X | 589 | -1.805-105.035 | 23.499 | 1.00 | 82.52 |
| N    |      |     |     |   |     |                |        |      |       |
| ATOM | 1186 | N   | VAL | X | 590 | 3.502-104.998  | 22.820 | 1.00 | 73.85 |
| N    |      |     |     |   |     |                |        |      |       |
| ATOM | 1187 | CA  | VAL | X | 590 | 4.391-106.168  | 22.926 | 1.00 | 74.77 |
| C    |      |     |     |   |     |                |        |      |       |
| ATOM | 1188 | C   | VAL | X | 590 | 3.623-107.363  | 23.468 | 1.00 | 77.97 |
| C    |      |     |     |   |     |                |        |      |       |
| ATOM | 1189 | O   | VAL | X | 590 | 2.819-107.238  | 24.395 | 1.00 | 82.58 |
| O    |      |     |     |   |     |                |        |      |       |
| ATOM | 1190 | CB  | VAL | X | 590 | 5.630-105.918  | 23.814 | 1.00 | 73.51 |
| C    |      |     |     |   |     |                |        |      |       |
| ATOM | 1191 | CG1 | VAL | X | 590 | 6.766-106.899  | 23.487 | 1.00 | 72.69 |
| C    |      |     |     |   |     |                |        |      |       |
| ATOM | 1192 | CG2 | VAL | X | 590 | 6.188-104.502  | 23.684 | 1.00 | 73.61 |
| C    |      |     |     |   |     |                |        |      |       |
| ATOM | 1193 | N   | CYS | X | 591 | 3.927-108.539  | 22.934 | 1.00 | 80.20 |
| N    |      |     |     |   |     |                |        |      |       |
| ATOM | 1194 | CA  | CYS | X | 591 | 3.470-109.808  | 23.473 | 1.00 | 81.78 |
| C    |      |     |     |   |     |                |        |      |       |
| ATOM | 1195 | C   | CYS | X | 591 | 4.584-110.837  | 23.509 | 1.00 | 81.54 |
| C    |      |     |     |   |     |                |        |      |       |
| ATOM | 1196 | O   | CYS | X | 591 | 5.699-110.589  | 23.037 | 1.00 | 79.28 |
| O    |      |     |     |   |     |                |        |      |       |
| ATOM | 1197 | CB  | CYS | X | 591 | 2.303-110.312  | 22.630 | 1.00 | 85.09 |
| C    |      |     |     |   |     |                |        |      |       |
| ATOM | 1198 | SG  | CYS | X | 591 | 2.793-110.701  | 20.872 | 1.00 | 90.44 |
| S    |      |     |     |   |     |                |        |      |       |
| ATOM | 1199 | N   | ILE | X | 592 | 4.242-112.019  | 24.022 | 1.00 | 84.43 |
| N    |      |     |     |   |     |                |        |      |       |
| ATOM | 1200 | CA  | ILE | X | 592 | 5.136-113.190  | 23.873 | 1.00 | 88.90 |
| C    |      |     |     |   |     |                |        |      |       |
| ATOM | 1201 | C   | ILE | X | 592 | 4.280-114.267  | 23.318 | 1.00 | 88.17 |
| C    |      |     |     |   |     |                |        |      |       |
| ATOM | 1202 | O   | ILE | X | 592 | 3.088-114.288  | 23.590 | 1.00 | 95.60 |
| O    |      |     |     |   |     |                |        |      |       |
| ATOM | 1203 | CB  | ILE | X | 592 | 5.778-113.680  | 25.201 | 1.00 | 89.79 |
| C    |      |     |     |   |     |                |        |      |       |
| ATOM | 1204 | CG1 | ILE | X | 592 | 5.165-112.982  | 26.400 | 1.00 | 95.24 |
| C    |      |     |     |   |     |                |        |      |       |
| ATOM | 1205 | CG2 | ILE | X | 592 | 7.293-113.476  | 25.113 | 1.00 | 88.75 |
| C    |      |     |     |   |     |                |        |      |       |



|      |      |     |     |   |     |               |        |            |
|------|------|-----|-----|---|-----|---------------|--------|------------|
| ATOM | 1206 | CD1 | ILE | X | 592 | 5.878-113.183 | 27.725 | 1.00101.07 |
| C    |      |     |     |   |     |               |        |            |
| ATOM | 1207 | N   | ALA | X | 593 | 4.810-115.001 | 22.357 | 1.00 82.48 |
| N    |      |     |     |   |     |               |        |            |
| ATOM | 1208 | CA  | ALA | X | 593 | 3.967-115.814 | 21.589 | 1.00 78.26 |
| C    |      |     |     |   |     |               |        |            |
| ATOM | 1209 | C   | ALA | X | 593 | 4.738-116.912 | 21.010 | 1.00 77.82 |
| C    |      |     |     |   |     |               |        |            |
| ATOM | 1210 | O   | ALA | X | 593 | 5.971-116.820 | 20.918 | 1.00 73.84 |
| O    |      |     |     |   |     |               |        |            |
| ATOM | 1211 | CB  | ALA | X | 593 | 3.314-114.990 | 20.535 | 1.00 76.36 |
| C    |      |     |     |   |     |               |        |            |
| ATOM | 1212 | N   | ARG | X | 594 | 4.018-118.008 | 20.759 | 1.00 80.99 |
| N    |      |     |     |   |     |               |        |            |
| ATOM | 1213 | CA  | ARG | X | 594 | 4.582-119.203 | 20.185 | 1.00 87.95 |
| C    |      |     |     |   |     |               |        |            |
| ATOM | 1214 | C   | ARG | X | 594 | 4.161-119.348 | 18.733 | 1.00 89.01 |
| C    |      |     |     |   |     |               |        |            |
| ATOM | 1215 | O   | ARG | X | 594 | 3.077-118.913 | 18.338 | 1.00 88.97 |
| O    |      |     |     |   |     |               |        |            |
| ATOM | 1216 | CB  | ARG | X | 594 | 4.149-120.434 | 20.966 | 1.00 97.43 |
| C    |      |     |     |   |     |               |        |            |
| ATOM | 1217 | CG  | ARG | X | 594 | 4.899-121.721 | 20.569 | 1.00108.42 |
| C    |      |     |     |   |     |               |        |            |
| ATOM | 1218 | CD  | ARG | X | 594 | 4.477-123.001 | 21.343 | 1.00118.55 |
| C    |      |     |     |   |     |               |        |            |
| ATOM | 1219 | NE  | ARG | X | 594 | 3.484-122.763 | 22.401 | 1.00125.50 |
| N    |      |     |     |   |     |               |        |            |
| ATOM | 1220 | CZ  | ARG | X | 594 | 3.710-122.876 | 23.708 | 1.00130.52 |
| C    |      |     |     |   |     |               |        |            |
| ATOM | 1221 | NH1 | ARG | X | 594 | 4.889-123.308 | 24.149 | 1.00135.24 |
| N    |      |     |     |   |     |               |        |            |
| ATOM | 1222 | NH2 | ARG | X | 594 | 2.736-122.585 | 24.581 | 1.00131.51 |
| N1+  |      |     |     |   |     |               |        |            |
| ATOM | 1223 | N   | LEU | X | 595 | 5.028-119.977 | 17.942 | 1.00 89.94 |
| N    |      |     |     |   |     |               |        |            |
| ATOM | 1224 | CA  | LEU | X | 595 | 5.086-119.752 | 16.502 | 1.00 90.65 |
| C    |      |     |     |   |     |               |        |            |
| ATOM | 1225 | C   | LEU | X | 595 | 5.464-121.079 | 15.792 | 1.00 99.50 |
| C    |      |     |     |   |     |               |        |            |
| ATOM | 1226 | O   | LEU | X | 595 | 6.494-121.668 | 16.126 | 1.00106.88 |
| O    |      |     |     |   |     |               |        |            |
| ATOM | 1227 | CB  | LEU | X | 595 | 6.160-118.695 | 16.204 | 1.00 84.60 |
| C    |      |     |     |   |     |               |        |            |
| ATOM | 1228 | CG  | LEU | X | 595 | 5.710-117.268 | 15.911 | 1.00 81.45 |
| C    |      |     |     |   |     |               |        |            |
| ATOM | 1229 | CD1 | LEU | X | 595 | 5.303-116.578 | 17.161 | 1.00 80.87 |
| C    |      |     |     |   |     |               |        |            |
| ATOM | 1230 | CD2 | LEU | X | 595 | 6.824-116.456 | 15.271 | 1.00 80.00 |
| C    |      |     |     |   |     |               |        |            |
| ATOM | 1231 | N   | ARG | X | 596 | 4.634-121.546 | 14.834 | 1.00106.33 |
| N    |      |     |     |   |     |               |        |            |
| ATOM | 1232 | CA  | ARG | X | 596 | 4.963-122.733 | 13.967 | 1.00106.23 |
| C    |      |     |     |   |     |               |        |            |

|      |      |     |     |   |     |                |        |      |        |
|------|------|-----|-----|---|-----|----------------|--------|------|--------|
| ATOM | 1233 | C   | ARG | X | 596 | 5.233-122.348  | 12.511 | 1.00 | 99.46  |
| C    |      |     |     |   |     |                |        |      |        |
| ATOM | 1234 | O   | ARG | X | 596 | 4.361-121.860  | 11.795 | 1.00 | 95.68  |
| O    |      |     |     |   |     |                |        |      |        |
| ATOM | 1235 | CB  | ARG | X | 596 | 3.864-123.826  | 14.022 | 1.00 | 116.26 |
| C    |      |     |     |   |     |                |        |      |        |
| ATOM | 1236 | CG  | ARG | X | 596 | 3.744-124.521  | 15.392 | 1.00 | 132.16 |
| C    |      |     |     |   |     |                |        |      |        |
| ATOM | 1237 | CD  | ARG | X | 596 | 3.485-126.033  | 15.342 | 1.00 | 139.66 |
| C    |      |     |     |   |     |                |        |      |        |
| ATOM | 1238 | NE  | ARG | X | 596 | 2.632-126.441  | 14.218 | 1.00 | 141.89 |
| N    |      |     |     |   |     |                |        |      |        |
| ATOM | 1239 | CZ  | ARG | X | 596 | 1.335-126.151  | 14.094 | 1.00 | 141.99 |
| C    |      |     |     |   |     |                |        |      |        |
| ATOM | 1240 | NH1 | ARG | X | 596 | 0.691-125.450  | 15.026 | 1.00 | 138.07 |
| N    |      |     |     |   |     |                |        |      |        |
| ATOM | 1241 | NH2 | ARG | X | 596 | 0.670-126.589  | 13.034 | 1.00 | 150.20 |
| N1+  |      |     |     |   |     |                |        |      |        |
| ATOM | 1242 | N   | THR | X | 597 | 6.437-122.645  | 12.074 | 1.00 | 96.28  |
| N    |      |     |     |   |     |                |        |      |        |
| ATOM | 1243 | CA  | THR | X | 597 | 6.825-122.474  | 10.689 | 1.00 | 97.24  |
| C    |      |     |     |   |     |                |        |      |        |
| ATOM | 1244 | C   | THR | X | 597 | 6.318-123.659  | 9.869  | 1.00 | 105.53 |
| C    |      |     |     |   |     |                |        |      |        |
| ATOM | 1245 | O   | THR | X | 597 | 6.764-124.789  | 10.069 | 1.00 | 113.02 |
| O    |      |     |     |   |     |                |        |      |        |
| ATOM | 1246 | CB  | THR | X | 597 | 8.367-122.434  | 10.554 | 1.00 | 93.82  |
| C    |      |     |     |   |     |                |        |      |        |
| ATOM | 1247 | OG1 | THR | X | 597 | 8.907-123.770  | 10.534 | 1.00 | 90.53  |
| O    |      |     |     |   |     |                |        |      |        |
| ATOM | 1248 | CG2 | THR | X | 597 | 8.978-121.668  | 11.690 | 1.00 | 92.97  |
| C    |      |     |     |   |     |                |        |      |        |
| ATOM | 1249 | N   | ALA | X | 598 | 5.471-123.405  | 8.879  | 1.00 | 112.32 |
| N    |      |     |     |   |     |                |        |      |        |
| ATOM | 1250 | CA  | ALA | X | 598 | 4.806-124.510  | 8.159  | 1.00 | 120.00 |
| C    |      |     |     |   |     |                |        |      |        |
| ATOM | 1251 | C   | ALA | X | 598 | 5.779-125.481  | 7.460  | 1.00 | 120.06 |
| C    |      |     |     |   |     |                |        |      |        |
| ATOM | 1252 | O   | ALA | X | 598 | 5.333-126.368  | 6.700  | 1.00 | 122.80 |
| O    |      |     |     |   |     |                |        |      |        |
| ATOM | 1253 | CB  | ALA | X | 598 | 3.780-123.977  | 7.155  | 1.00 | 121.93 |
| C    |      |     |     |   |     |                |        |      |        |
| ATOM | 1254 | N   | GLY | X | 599 | 7.084-125.316  | 7.707  | 1.00 | 114.20 |
| N    |      |     |     |   |     |                |        |      |        |
| ATOM | 1255 | CA  | GLY | X | 599 | 8.047-126.399  | 7.511  | 1.00 | 119.36 |
| C    |      |     |     |   |     |                |        |      |        |
| ATOM | 1256 | C   | GLY | X | 599 | 8.948-126.637  | 8.714  | 1.00 | 126.06 |
| C    |      |     |     |   |     |                |        |      |        |
| ATOM | 1257 | O   | GLY | X | 599 | 8.523-127.260  | 9.710  | 1.00 | 137.50 |
| O    |      |     |     |   |     |                |        |      |        |
| ATOM | 1258 | N   | THR | X | 600 | 10.217-126.230 | 8.575  | 1.00 | 118.67 |
| N    |      |     |     |   |     |                |        |      |        |
| ATOM | 1259 | CA  | THR | X | 600 | 11.252-126.486 | 9.583  | 1.00 | 107.35 |
| C    |      |     |     |   |     |                |        |      |        |

|      |      |     |     |   |     |                |        |            |
|------|------|-----|-----|---|-----|----------------|--------|------------|
| ATOM | 1260 | C   | THR | X | 600 | 12.341-125.482 | 9.431  | 1.00100.64 |
| C    |      |     |     |   |     |                |        |            |
| ATOM | 1261 | O   | THR | X | 600 | 12.693-125.086 | 8.319  | 1.00102.77 |
| O    |      |     |     |   |     |                |        |            |
| ATOM | 1262 | CB  | THR | X | 600 | 11.858-127.906 | 9.449  | 1.00108.25 |
| C    |      |     |     |   |     |                |        |            |
| ATOM | 1263 | OG1 | THR | X | 600 | 11.680-128.598 | 10.681 | 1.00110.62 |
| O    |      |     |     |   |     |                |        |            |
| ATOM | 1264 | CG2 | THR | X | 600 | 13.371-127.892 | 9.078  | 1.00105.78 |
| C    |      |     |     |   |     |                |        |            |
| ATOM | 1265 | N   | ILE | X | 601 | 12.926-125.119 | 10.541 | 1.00 94.73 |
| N    |      |     |     |   |     |                |        |            |
| ATOM | 1266 | CA  | ILE | X | 601 | 13.813-124.003 | 10.564 | 1.00 95.09 |
| C    |      |     |     |   |     |                |        |            |
| ATOM | 1267 | C   | ILE | X | 601 | 15.137-124.502 | 11.103 | 1.00 95.79 |
| C    |      |     |     |   |     |                |        |            |
| ATOM | 1268 | O   | ILE | X | 601 | 15.301-125.701 | 11.285 | 1.00 93.00 |
| O    |      |     |     |   |     |                |        |            |
| ATOM | 1269 | CB  | ILE | X | 601 | 13.183-122.897 | 11.437 | 1.00 98.59 |
| C    |      |     |     |   |     |                |        |            |
| ATOM | 1270 | CG1 | ILE | X | 601 | 12.045-122.209 | 10.707 | 1.00 99.59 |
| C    |      |     |     |   |     |                |        |            |
| ATOM | 1271 | CG2 | ILE | X | 601 | 14.173-121.825 | 11.814 | 1.00101.91 |
| C    |      |     |     |   |     |                |        |            |
| ATOM | 1272 | CD1 | ILE | X | 601 | 12.435-121.695 | 9.335  | 1.00106.62 |
| C    |      |     |     |   |     |                |        |            |
| ATOM | 1273 | N   | CYS | X | 602 | 16.114-123.613 | 11.267 | 1.00101.36 |
| N    |      |     |     |   |     |                |        |            |
| ATOM | 1274 | CA  | CYS | X | 602 | 17.107-123.764 | 12.352 | 1.00115.27 |
| C    |      |     |     |   |     |                |        |            |
| ATOM | 1275 | C   | CYS | X | 602 | 17.317-122.503 | 13.267 | 1.00117.58 |
| C    |      |     |     |   |     |                |        |            |
| ATOM | 1276 | O   | CYS | X | 602 | 18.150-121.611 | 12.982 | 1.00113.02 |
| O    |      |     |     |   |     |                |        |            |
| ATOM | 1277 | CB  | CYS | X | 602 | 18.426-124.280 | 11.796 | 1.00120.85 |
| C    |      |     |     |   |     |                |        |            |
| ATOM | 1278 | SG  | CYS | X | 602 | 18.479-124.161 | 9.999  | 1.00147.23 |
| S    |      |     |     |   |     |                |        |            |
| ATOM | 1279 | N   | LEU | X | 603 | 16.603-122.517 | 14.408 | 1.00116.91 |
| N    |      |     |     |   |     |                |        |            |
| ATOM | 1280 | CA  | LEU | X | 603 | 16.599-121.436 | 15.383 | 1.00114.84 |
| C    |      |     |     |   |     |                |        |            |
| ATOM | 1281 | C   | LEU | X | 603 | 17.819-121.425 | 16.268 | 1.00114.37 |
| C    |      |     |     |   |     |                |        |            |
| ATOM | 1282 | O   | LEU | X | 603 | 18.456-122.456 | 16.457 | 1.00110.70 |
| O    |      |     |     |   |     |                |        |            |
| ATOM | 1283 | CB  | LEU | X | 603 | 15.397-121.598 | 16.287 | 1.00118.83 |
| C    |      |     |     |   |     |                |        |            |
| ATOM | 1284 | CG  | LEU | X | 603 | 14.083-121.327 | 15.583 | 1.00125.10 |
| C    |      |     |     |   |     |                |        |            |
| ATOM | 1285 | CD1 | LEU | X | 603 | 13.060-122.385 | 15.991 | 1.00130.46 |
| C    |      |     |     |   |     |                |        |            |
| ATOM | 1286 | CD2 | LEU | X | 603 | 13.603-119.896 | 15.869 | 1.00127.40 |
| C    |      |     |     |   |     |                |        |            |

|      |      |     |     |   |     |                |        |            |
|------|------|-----|-----|---|-----|----------------|--------|------------|
| ATOM | 1287 | N   | GLU | X | 604 | 18.100-120.248 | 16.839 | 1.00113.51 |
| N    |      |     |     |   |     |                |        |            |
| ATOM | 1288 | CA  | GLU | X | 604 | 18.685-120.118 | 18.178 | 1.00113.33 |
| C    |      |     |     |   |     |                |        |            |
| ATOM | 1289 | C   | GLU | X | 604 | 17.854-119.168 | 19.020 | 1.00108.09 |
| C    |      |     |     |   |     |                |        |            |
| ATOM | 1290 | O   | GLU | X | 604 | 17.144-118.331 | 18.497 | 1.00107.95 |
| O    |      |     |     |   |     |                |        |            |
| ATOM | 1291 | CB  | GLU | X | 604 | 20.115-119.586 | 18.099 | 1.00121.11 |
| C    |      |     |     |   |     |                |        |            |
| ATOM | 1292 | CG  | GLU | X | 604 | 21.088-120.492 | 17.350 | 1.00134.31 |
| C    |      |     |     |   |     |                |        |            |
| ATOM | 1293 | CD  | GLU | X | 604 | 21.440-121.784 | 18.083 | 1.00136.25 |
| C    |      |     |     |   |     |                |        |            |
| ATOM | 1294 | OE1 | GLU | X | 604 | 21.432-121.796 | 19.352 | 1.00126.79 |
| O    |      |     |     |   |     |                |        |            |
| ATOM | 1295 | OE2 | GLU | X | 604 | 21.730-122.782 | 17.349 | 1.00135.21 |
| O1-  |      |     |     |   |     |                |        |            |
| ATOM | 1296 | N   | THR | X | 605 | 17.991-119.258 | 20.335 | 1.00110.47 |
| N    |      |     |     |   |     |                |        |            |
| ATOM | 1297 | CA  | THR | X | 605 | 17.361-118.280 | 21.236 | 1.00108.87 |
| C    |      |     |     |   |     |                |        |            |
| ATOM | 1298 | C   | THR | X | 605 | 18.218-117.046 | 21.275 | 1.00102.44 |
| C    |      |     |     |   |     |                |        |            |
| ATOM | 1299 | O   | THR | X | 605 | 19.426-117.134 | 21.198 | 1.00103.33 |
| O    |      |     |     |   |     |                |        |            |
| ATOM | 1300 | CB  | THR | X | 605 | 17.182-118.830 | 22.668 | 1.00112.98 |
| C    |      |     |     |   |     |                |        |            |
| ATOM | 1301 | OG1 | THR | X | 605 | 18.441-118.867 | 23.336 | 1.00113.32 |
| O    |      |     |     |   |     |                |        |            |
| ATOM | 1302 | CG2 | THR | X | 605 | 16.598-120.252 | 22.634 | 1.00118.01 |
| C    |      |     |     |   |     |                |        |            |
| ATOM | 1303 | N   | PHE | X | 606 | 17.566-115.918 | 21.400 | 1.00 98.50 |
| N    |      |     |     |   |     |                |        |            |
| ATOM | 1304 | CA  | PHE | X | 606 | 18.243-114.646 | 21.443 | 1.00100.16 |
| C    |      |     |     |   |     |                |        |            |
| ATOM | 1305 | C   | PHE | X | 606 | 18.964-114.966 | 22.706 | 1.00105.64 |
| C    |      |     |     |   |     |                |        |            |
| ATOM | 1306 | O   | PHE | X | 606 | 18.638-115.945 | 23.348 | 1.00 99.13 |
| O    |      |     |     |   |     |                |        |            |
| ATOM | 1307 | CB  | PHE | X | 606 | 17.375-113.418 | 21.585 | 1.00 96.21 |
| C    |      |     |     |   |     |                |        |            |
| ATOM | 1308 | CG  | PHE | X | 606 | 18.107-112.079 | 21.395 | 1.00 91.06 |
| C    |      |     |     |   |     |                |        |            |
| ATOM | 1309 | CD1 | PHE | X | 606 | 19.473-111.868 | 21.112 | 1.00 89.19 |
| C    |      |     |     |   |     |                |        |            |
| ATOM | 1310 | CD2 | PHE | X | 606 | 17.315-110.955 | 21.497 | 1.00 91.01 |
| C    |      |     |     |   |     |                |        |            |
| ATOM | 1311 | CE1 | PHE | X | 606 | 19.956-110.562 | 20.882 | 1.00 89.61 |
| C    |      |     |     |   |     |                |        |            |
| ATOM | 1312 | CE2 | PHE | X | 606 | 17.756-109.657 | 21.200 | 1.00 91.02 |
| C    |      |     |     |   |     |                |        |            |
| ATOM | 1313 | CZ  | PHE | X | 606 | 19.094-109.464 | 20.872 | 1.00 91.88 |
| C    |      |     |     |   |     |                |        |            |

|             |      |     |           |                |        |            |
|-------------|------|-----|-----------|----------------|--------|------------|
| ATOM<br>N   | 1314 | N   | LYS X 607 | 19.966-114.177 | 23.048 | 1.00111.98 |
| ATOM<br>C   | 1315 | CA  | LYS X 607 | 20.706-114.402 | 24.274 | 1.00116.00 |
| ATOM<br>C   | 1316 | C   | LYS X 607 | 21.576-115.586 | 24.024 | 1.00114.29 |
| ATOM<br>O   | 1317 | O   | LYS X 607 | 22.784-115.494 | 24.133 | 1.00111.17 |
| ATOM<br>C   | 1318 | CB  | LYS X 607 | 19.742-114.672 | 25.490 | 1.00 0.00  |
| ATOM<br>C   | 1319 | CG  | LYS X 607 | 20.374-114.410 | 26.872 | 1.00 0.00  |
| ATOM<br>C   | 1320 | CD  | LYS X 607 | 20.774-112.947 | 27.152 | 1.00 0.00  |
| ATOM<br>C   | 1321 | CE  | LYS X 607 | 19.600-111.961 | 27.052 | 1.00 0.00  |
| ATOM<br>N1+ | 1322 | NZ  | LYS X 607 | 20.023-110.580 | 27.330 | 1.00 0.00  |
| ATOM<br>N   | 1323 | N   | ASP X 608 | 20.976-116.706 | 23.660 | 1.00118.32 |
| ATOM<br>C   | 1324 | CA  | ASP X 608 | 21.777-117.877 | 23.369 | 1.00129.53 |
| ATOM<br>C   | 1325 | C   | ASP X 608 | 22.619-117.486 | 22.179 | 1.00130.69 |
| ATOM<br>O   | 1326 | O   | ASP X 608 | 23.796-117.787 | 22.101 | 1.00138.83 |
| ATOM<br>C   | 1327 | CB  | ASP X 608 | 20.901-119.065 | 23.026 | 1.00136.01 |
| ATOM<br>C   | 1328 | CG  | ASP X 608 | 21.654-120.362 | 23.084 | 1.00144.15 |
| ATOM<br>O   | 1329 | OD1 | ASP X 608 | 22.896-120.324 | 23.140 | 1.00144.04 |
| ATOM<br>O1- | 1330 | OD2 | ASP X 608 | 21.007-121.423 | 23.079 | 1.00152.67 |
| ATOM<br>N   | 1331 | N   | PHE X 609 | 21.975-116.788 | 21.259 | 1.00130.19 |
| ATOM<br>C   | 1332 | CA  | PHE X 609 | 22.591-116.267 | 20.056 | 1.00131.42 |
| ATOM<br>C   | 1333 | C   | PHE X 609 | 21.757-115.079 | 19.707 | 1.00128.48 |
| ATOM<br>O   | 1334 | O   | PHE X 609 | 20.632-114.995 | 20.180 | 1.00134.16 |
| ATOM<br>C   | 1335 | CB  | PHE X 609 | 22.549-117.262 | 18.922 | 1.00127.37 |
| ATOM<br>C   | 1336 | CG  | PHE X 609 | 23.872-117.833 | 18.612 | 1.00128.49 |
| ATOM<br>C   | 1337 | CD1 | PHE X 609 | 24.912-117.004 | 18.280 | 1.00139.79 |
| ATOM<br>C   | 1338 | CD2 | PHE X 609 | 24.088-119.184 | 18.677 | 1.00127.22 |
| ATOM<br>C   | 1339 | CE1 | PHE X 609 | 26.155-117.514 | 18.004 | 1.00152.19 |
| ATOM<br>C   | 1340 | CE2 | PHE X 609 | 25.328-119.709 | 18.399 | 1.00139.97 |

|      |      |     |     |   |     |                |        |            |
|------|------|-----|-----|---|-----|----------------|--------|------------|
| ATOM | 1341 | CZ  | PHE | X | 609 | 26.365-118.871 | 18.062 | 1.00153.78 |
| C    |      |     |     |   |     |                |        |            |
| ATOM | 1342 | N   | PRO | X | 610 | 22.333-114.127 | 18.886 | 1.00119.07 |
| N    |      |     |     |   |     |                |        |            |
| ATOM | 1343 | CA  | PRO | X | 610 | 21.470-112.998 | 18.597 | 1.00113.35 |
| C    |      |     |     |   |     |                |        |            |
| ATOM | 1344 | C   | PRO | X | 610 | 21.084-112.872 | 17.143 | 1.00106.42 |
| C    |      |     |     |   |     |                |        |            |
| ATOM | 1345 | O   | PRO | X | 610 | 19.913-112.814 | 16.818 | 1.00105.73 |
| O    |      |     |     |   |     |                |        |            |
| ATOM | 1346 | CB  | PRO | X | 610 | 22.365-111.833 | 18.954 | 1.00114.87 |
| C    |      |     |     |   |     |                |        |            |
| ATOM | 1347 | CG  | PRO | X | 610 | 23.709-112.270 | 18.481 | 1.00120.01 |
| C    |      |     |     |   |     |                |        |            |
| ATOM | 1348 | CD  | PRO | X | 610 | 23.673-113.758 | 18.278 | 1.00121.27 |
| C    |      |     |     |   |     |                |        |            |
| ATOM | 1349 | N   | GLN | X | 611 | 22.064-112.863 | 16.263 | 1.00101.17 |
| N    |      |     |     |   |     |                |        |            |
| ATOM | 1350 | CA  | GLN | X | 611 | 21.795-112.659 | 14.852 | 1.00102.79 |
| C    |      |     |     |   |     |                |        |            |
| ATOM | 1351 | C   | GLN | X | 611 | 20.912-113.707 | 14.233 | 1.00 96.03 |
| C    |      |     |     |   |     |                |        |            |
| ATOM | 1352 | O   | GLN | X | 611 | 20.278-113.481 | 13.221 | 1.00 85.07 |
| O    |      |     |     |   |     |                |        |            |
| ATOM | 1353 | CB  | GLN | X | 611 | 23.093-112.555 | 14.070 | 1.00112.81 |
| C    |      |     |     |   |     |                |        |            |
| ATOM | 1354 | CG  | GLN | X | 611 | 24.279-113.232 | 14.719 | 1.00118.29 |
| C    |      |     |     |   |     |                |        |            |
| ATOM | 1355 | CD  | GLN | X | 611 | 25.203-112.244 | 15.382 | 1.00121.32 |
| C    |      |     |     |   |     |                |        |            |
| ATOM | 1356 | OE1 | GLN | X | 611 | 25.019-111.040 | 15.268 | 1.00110.50 |
| O    |      |     |     |   |     |                |        |            |
| ATOM | 1357 | NE2 | GLN | X | 611 | 26.207-112.747 | 16.072 | 1.00134.65 |
| N    |      |     |     |   |     |                |        |            |
| ATOM | 1358 | N   | MET | X | 612 | 20.896-114.868 | 14.836 | 1.00 95.54 |
| N    |      |     |     |   |     |                |        |            |
| ATOM | 1359 | CA  | MET | X | 612 | 20.134-115.978 | 14.325 | 1.00100.94 |
| C    |      |     |     |   |     |                |        |            |
| ATOM | 1360 | C   | MET | X | 612 | 18.866-116.220 | 15.102 | 1.00101.50 |
| C    |      |     |     |   |     |                |        |            |
| ATOM | 1361 | O   | MET | X | 612 | 18.093-117.126 | 14.777 | 1.00103.12 |
| O    |      |     |     |   |     |                |        |            |
| ATOM | 1362 | CB  | MET | X | 612 | 20.966-117.217 | 14.365 | 1.00110.20 |
| C    |      |     |     |   |     |                |        |            |
| ATOM | 1363 | CG  | MET | X | 612 | 22.460-116.930 | 14.329 | 1.00121.62 |
| C    |      |     |     |   |     |                |        |            |
| ATOM | 1364 | SD  | MET | X | 612 | 23.432-118.351 | 13.814 | 1.00137.07 |
| S    |      |     |     |   |     |                |        |            |
| ATOM | 1365 | CE  | MET | X | 612 | 22.225-119.706 | 13.850 | 1.00127.87 |
| C    |      |     |     |   |     |                |        |            |
| ATOM | 1366 | N   | GLY | X | 613 | 18.622-115.379 | 16.098 | 1.00101.62 |
| N    |      |     |     |   |     |                |        |            |
| ATOM | 1367 | CA  | GLY | X | 613 | 17.343-115.387 | 16.816 | 1.00101.93 |
| C    |      |     |     |   |     |                |        |            |

|      |      |     |     |   |     |                |        |      |        |
|------|------|-----|-----|---|-----|----------------|--------|------|--------|
| ATOM | 1368 | C   | GLY | X | 613 | 16.646-114.031 | 16.960 | 1.00 | 99.37  |
| C    |      |     |     |   |     |                |        |      |        |
| ATOM | 1369 | O   | GLY | X | 613 | 15.633-113.926 | 17.652 | 1.00 | 100.67 |
| O    |      |     |     |   |     |                |        |      |        |
| ATOM | 1370 | N   | ARG | X | 614 | 17.192-112.954 | 16.388 | 1.00 | 97.17  |
| N    |      |     |     |   |     |                |        |      |        |
| ATOM | 1371 | CA  | ARG | X | 614 | 16.354-111.820 | 16.010 | 1.00 | 93.74  |
| C    |      |     |     |   |     |                |        |      |        |
| ATOM | 1372 | C   | ARG | X | 614 | 15.698-112.157 | 14.685 | 1.00 | 82.90  |
| C    |      |     |     |   |     |                |        |      |        |
| ATOM | 1373 | O   | ARG | X | 614 | 16.220-112.907 | 13.860 | 1.00 | 77.54  |
| O    |      |     |     |   |     |                |        |      |        |
| ATOM | 1374 | CB  | ARG | X | 614 | 17.060-110.455 | 16.036 | 1.00 | 106.44 |
| C    |      |     |     |   |     |                |        |      |        |
| ATOM | 1375 | CG  | ARG | X | 614 | 17.841-110.076 | 14.762 | 1.00 | 122.15 |
| C    |      |     |     |   |     |                |        |      |        |
| ATOM | 1376 | CD  | ARG | X | 614 | 19.336-109.996 | 15.018 | 1.00 | 134.83 |
| C    |      |     |     |   |     |                |        |      |        |
| ATOM | 1377 | NE  | ARG | X | 614 | 19.737-108.756 | 15.690 | 1.00 | 139.55 |
| N    |      |     |     |   |     |                |        |      |        |
| ATOM | 1378 | CZ  | ARG | X | 614 | 20.988-108.455 | 15.961 | 1.00 | 149.55 |
| C    |      |     |     |   |     |                |        |      |        |
| ATOM | 1379 | NH1 | ARG | X | 614 | 21.268-107.298 | 16.571 | 1.00 | 151.42 |
| N    |      |     |     |   |     |                |        |      |        |
| ATOM | 1380 | NH2 | ARG | X | 614 | 21.982-109.292 | 15.637 | 1.00 | 147.82 |
| N1+  |      |     |     |   |     |                |        |      |        |
| ATOM | 1381 | N   | PHE | X | 615 | 14.529-111.614 | 14.475 | 1.00 | 77.56  |
| N    |      |     |     |   |     |                |        |      |        |
| ATOM | 1382 | CA  | PHE | X | 615 | 13.816-111.886 | 13.253 | 1.00 | 75.64  |
| C    |      |     |     |   |     |                |        |      |        |
| ATOM | 1383 | C   | PHE | X | 615 | 12.719-110.880 | 13.110 | 1.00 | 73.46  |
| C    |      |     |     |   |     |                |        |      |        |
| ATOM | 1384 | O   | PHE | X | 615 | 12.354-110.163 | 14.046 | 1.00 | 78.25  |
| O    |      |     |     |   |     |                |        |      |        |
| ATOM | 1385 | CB  | PHE | X | 615 | 13.280-113.316 | 13.320 | 1.00 | 75.52  |
| C    |      |     |     |   |     |                |        |      |        |
| ATOM | 1386 | CG  | PHE | X | 615 | 12.080-113.496 | 14.189 | 1.00 | 74.68  |
| C    |      |     |     |   |     |                |        |      |        |
| ATOM | 1387 | CD1 | PHE | X | 615 | 10.829-113.164 | 13.664 | 1.00 | 73.49  |
| C    |      |     |     |   |     |                |        |      |        |
| ATOM | 1388 | CD2 | PHE | X | 615 | 12.219-113.984 | 15.500 | 1.00 | 76.20  |
| C    |      |     |     |   |     |                |        |      |        |
| ATOM | 1389 | CE1 | PHE | X | 615 | 9.702-113.360  | 14.460 | 1.00 | 75.20  |
| C    |      |     |     |   |     |                |        |      |        |
| ATOM | 1390 | CE2 | PHE | X | 615 | 11.080-114.174 | 16.293 | 1.00 | 76.24  |
| C    |      |     |     |   |     |                |        |      |        |
| ATOM | 1391 | CZ  | PHE | X | 615 | 9.813-113.874  | 15.766 | 1.00 | 75.61  |
| C    |      |     |     |   |     |                |        |      |        |
| ATOM | 1392 | N   | THR | X | 616 | 12.138-110.883 | 11.931 | 1.00 | 69.02  |
| N    |      |     |     |   |     |                |        |      |        |
| ATOM | 1393 | CA  | THR | X | 616 | 11.117-109.916 | 11.625 | 1.00 | 66.36  |
| C    |      |     |     |   |     |                |        |      |        |
| ATOM | 1394 | C   | THR | X | 616 | 10.020-110.695 | 11.008 | 1.00 | 65.84  |
| C    |      |     |     |   |     |                |        |      |        |

|      |      |     |     |   |     |                |        |      |        |
|------|------|-----|-----|---|-----|----------------|--------|------|--------|
| ATOM | 1395 | O   | THR | X | 616 | 10.191-111.252 | 9.959  | 1.00 | 65.77  |
| O    |      |     |     |   |     |                |        |      |        |
| ATOM | 1396 | CB  | THR | X | 616 | 11.660-108.888 | 10.658 | 1.00 | 65.45  |
| C    |      |     |     |   |     |                |        |      |        |
| ATOM | 1397 | OG1 | THR | X | 616 | 10.589-108.341 | 9.918  | 1.00 | 64.53  |
| O    |      |     |     |   |     |                |        |      |        |
| ATOM | 1398 | CG2 | THR | X | 616 | 12.706-109.487 | 9.713  | 1.00 | 64.91  |
| C    |      |     |     |   |     |                |        |      |        |
| ATOM | 1399 | N   | LEU | X | 617 | 8.864-110.736  | 11.641 | 1.00 | 66.15  |
| N    |      |     |     |   |     |                |        |      |        |
| ATOM | 1400 | CA  | LEU | X | 617 | 7.646-111.040  | 10.885 | 1.00 | 67.73  |
| C    |      |     |     |   |     |                |        |      |        |
| ATOM | 1401 | C   | LEU | X | 617 | 7.479-110.009  | 9.832  | 1.00 | 70.71  |
| C    |      |     |     |   |     |                |        |      |        |
| ATOM | 1402 | O   | LEU | X | 617 | 7.924-108.895  | 10.034 | 1.00 | 72.09  |
| O    |      |     |     |   |     |                |        |      |        |
| ATOM | 1403 | CB  | LEU | X | 617 | 6.409-110.999  | 11.746 | 1.00 | 66.99  |
| C    |      |     |     |   |     |                |        |      |        |
| ATOM | 1404 | CG  | LEU | X | 617 | 5.974-112.365  | 12.248 | 1.00 | 66.45  |
| C    |      |     |     |   |     |                |        |      |        |
| ATOM | 1405 | CD1 | LEU | X | 617 | 7.107-113.005  | 12.971 | 1.00 | 65.99  |
| C    |      |     |     |   |     |                |        |      |        |
| ATOM | 1406 | CD2 | LEU | X | 617 | 4.764-112.300  | 13.161 | 1.00 | 66.75  |
| C    |      |     |     |   |     |                |        |      |        |
| ATOM | 1407 | N   | ARG | X | 618 | 6.810-110.366  | 8.731  | 1.00 | 74.32  |
| N    |      |     |     |   |     |                |        |      |        |
| ATOM | 1408 | CA  | ARG | X | 618 | 6.718-109.508  | 7.532  | 1.00 | 77.36  |
| C    |      |     |     |   |     |                |        |      |        |
| ATOM | 1409 | C   | ARG | X | 618 | 5.504-109.970  | 6.728  | 1.00 | 79.60  |
| C    |      |     |     |   |     |                |        |      |        |
| ATOM | 1410 | O   | ARG | X | 618 | 5.249-111.147  | 6.640  | 1.00 | 78.36  |
| O    |      |     |     |   |     |                |        |      |        |
| ATOM | 1411 | CB  | ARG | X | 618 | 7.991-109.630  | 6.708  | 1.00 | 79.19  |
| C    |      |     |     |   |     |                |        |      |        |
| ATOM | 1412 | CG  | ARG | X | 618 | 8.412-108.343  | 6.042  | 1.00 | 85.21  |
| C    |      |     |     |   |     |                |        |      |        |
| ATOM | 1413 | CD  | ARG | X | 618 | 9.651-107.773  | 6.678  | 1.00 | 94.93  |
| C    |      |     |     |   |     |                |        |      |        |
| ATOM | 1414 | NE  | ARG | X | 618 | 10.860-108.567 | 6.384  | 1.00 | 107.11 |
| N    |      |     |     |   |     |                |        |      |        |
| ATOM | 1415 | CZ  | ARG | X | 618 | 11.776-108.252 | 5.454  | 1.00 | 124.56 |
| C    |      |     |     |   |     |                |        |      |        |
| ATOM | 1416 | NH1 | ARG | X | 618 | 11.608-107.183 | 4.662  | 1.00 | 134.53 |
| N    |      |     |     |   |     |                |        |      |        |
| ATOM | 1417 | NH2 | ARG | X | 618 | 12.863-109.021 | 5.293  | 1.00 | 125.90 |
| N1+  |      |     |     |   |     |                |        |      |        |
| ATOM | 1418 | N   | ASP | X | 619 | 4.638-109.059  | 6.327  | 1.00 | 85.89  |
| N    |      |     |     |   |     |                |        |      |        |
| ATOM | 1419 | CA  | ASP | X | 619 | 3.395-109.458  | 5.632  | 1.00 | 94.58  |
| C    |      |     |     |   |     |                |        |      |        |
| ATOM | 1420 | C   | ASP | X | 619 | 3.060-108.372  | 4.630  | 1.00 | 106.52 |
| C    |      |     |     |   |     |                |        |      |        |
| ATOM | 1421 | O   | ASP | X | 619 | 3.270-107.176  | 4.918  | 1.00 | 126.63 |
| O    |      |     |     |   |     |                |        |      |        |



|             |      |     |     |   |     |                |       |      |        |
|-------------|------|-----|-----|---|-----|----------------|-------|------|--------|
| ATOM<br>C   | 1422 | CB  | ASP | X | 619 | 2.224-109.684  | 6.633 | 1.00 | 94.80  |
| ATOM<br>C   | 1423 | CG  | ASP | X | 619 | 0.903-110.141  | 5.937 | 1.00 | 97.34  |
| ATOM<br>O   | 1424 | OD1 | ASP | X | 619 | 0.788-111.315  | 5.487 | 1.00 | 100.29 |
| ATOM<br>O1- | 1425 | OD2 | ASP | X | 619 | -0.051-109.343 | 5.909 | 1.00 | 96.99  |
| ATOM<br>N   | 1426 | N   | GLU | X | 620 | 2.595-108.767  | 3.440 | 1.00 | 110.34 |
| ATOM<br>C   | 1427 | CA  | GLU | X | 620 | 2.479-107.818  | 2.330 | 1.00 | 113.40 |
| ATOM<br>C   | 1428 | C   | GLU | X | 620 | 3.787-106.997  | 2.249 | 1.00 | 110.06 |
| ATOM<br>O   | 1429 | O   | GLU | X | 620 | 3.737-105.772  | 2.118 | 1.00 | 117.61 |
| ATOM<br>C   | 1430 | CB  | GLU | X | 620 | 1.329-106.826  | 2.587 | 1.00 | 122.78 |
| ATOM<br>C   | 1431 | CG  | GLU | X | 620 | -0.079-107.408 | 2.650 | 1.00 | 128.44 |
| ATOM<br>C   | 1432 | CD  | GLU | X | 620 | -1.086-106.483 | 3.365 | 1.00 | 132.76 |
| ATOM<br>O   | 1433 | OE1 | GLU | X | 620 | -2.282-106.558 | 3.034 | 1.00 | 146.79 |
| ATOM<br>O1- | 1434 | OE2 | GLU | X | 620 | -0.689-105.658 | 4.230 | 1.00 | 123.54 |
| ATOM<br>N   | 1435 | N   | GLY | X | 621 | 4.932-107.621  | 2.533 | 1.00 | 100.84 |
| ATOM<br>C   | 1436 | CA  | GLY | X | 621 | 6.228-106.973  | 2.298 | 1.00 | 95.86  |
| ATOM<br>C   | 1437 | C   | GLY | X | 621 | 6.575-105.837  | 3.259 | 1.00 | 95.59  |
| ATOM<br>O   | 1438 | O   | GLY | X | 621 | 7.766-105.523  | 3.437 | 1.00 | 94.55  |
| ATOM<br>N   | 1439 | N   | LYS | X | 622 | 5.564-105.321  | 3.976 | 1.00 | 94.74  |
| ATOM<br>C   | 1440 | CA  | LYS | X | 622 | 5.804-104.524  | 5.196 | 1.00 | 93.07  |
| ATOM<br>C   | 1441 | C   | LYS | X | 622 | 6.471-105.315  | 6.270 | 1.00 | 86.13  |
| ATOM<br>O   | 1442 | O   | LYS | X | 622 | 6.237-106.507  | 6.424 | 1.00 | 80.59  |
| ATOM<br>C   | 1443 | CB  | LYS | X | 622 | 4.514-104.023  | 5.808 | 1.00 | 97.76  |
| ATOM<br>C   | 1444 | CG  | LYS | X | 622 | 4.002-102.758  | 5.198 | 1.00 | 106.74 |
| ATOM<br>C   | 1445 | CD  | LYS | X | 622 | 2.799-103.060  | 4.319 | 1.00 | 118.34 |
| ATOM<br>C   | 1446 | CE  | LYS | X | 622 | 1.694-102.024  | 4.501 | 1.00 | 126.03 |
| ATOM<br>N1+ | 1447 | NZ  | LYS | X | 622 | 2.213-100.620  | 4.473 | 1.00 | 129.85 |
| ATOM<br>N   | 1448 | N   | THR | X | 623 | 7.111-104.582  | 7.154 | 1.00 | 84.93  |

|      |      |     |     |   |     |                |        |      |        |
|------|------|-----|-----|---|-----|----------------|--------|------|--------|
| ATOM | 1449 | CA  | THR | X | 623 | 7.497-105.118  | 8.461  | 1.00 | 83.10  |
| C    |      |     |     |   |     |                |        |      |        |
| ATOM | 1450 | C   | THR | X | 623 | 6.410-104.885  | 9.489  | 1.00 | 77.46  |
| C    |      |     |     |   |     |                |        |      |        |
| ATOM | 1451 | O   | THR | X | 623 | 6.055-103.759  | 9.797  | 1.00 | 74.07  |
| O    |      |     |     |   |     |                |        |      |        |
| ATOM | 1452 | CB  | THR | X | 623 | 8.834-104.507  | 8.937  | 1.00 | 84.89  |
| C    |      |     |     |   |     |                |        |      |        |
| ATOM | 1453 | OG1 | THR | X | 623 | 9.798-104.604  | 7.864  | 1.00 | 93.66  |
| O    |      |     |     |   |     |                |        |      |        |
| ATOM | 1454 | CG2 | THR | X | 623 | 9.377-105.225  | 10.135 | 1.00 | 81.54  |
| C    |      |     |     |   |     |                |        |      |        |
| ATOM | 1455 | N   | ILE | X | 624 | 5.944-105.975  | 10.049 | 1.00 | 75.52  |
| N    |      |     |     |   |     |                |        |      |        |
| ATOM | 1456 | CA  | ILE | X | 624 | 4.759-105.975  | 10.831 | 1.00 | 77.11  |
| C    |      |     |     |   |     |                |        |      |        |
| ATOM | 1457 | C   | ILE | X | 624 | 5.000-106.350  | 12.331 | 1.00 | 79.04  |
| C    |      |     |     |   |     |                |        |      |        |
| ATOM | 1458 | O   | ILE | X | 624 | 4.088-106.197  | 13.166 | 1.00 | 79.86  |
| O    |      |     |     |   |     |                |        |      |        |
| ATOM | 1459 | CB  | ILE | X | 624 | 3.782-106.935  | 10.205 | 1.00 | 77.65  |
| C    |      |     |     |   |     |                |        |      |        |
| ATOM | 1460 | CG1 | ILE | X | 624 | 2.357-106.529  | 10.549 | 1.00 | 80.70  |
| C    |      |     |     |   |     |                |        |      |        |
| ATOM | 1461 | CG2 | ILE | X | 624 | 4.088-108.368  | 10.645 | 1.00 | 76.29  |
| C    |      |     |     |   |     |                |        |      |        |
| ATOM | 1462 | CD1 | ILE | X | 624 | 1.328-107.445  | 9.912  | 1.00 | 82.30  |
| C    |      |     |     |   |     |                |        |      |        |
| ATOM | 1463 | N   | ALA | X | 625 | 6.217-106.838  | 12.654 | 1.00 | 79.33  |
| N    |      |     |     |   |     |                |        |      |        |
| ATOM | 1464 | CA  | ALA | X | 625 | 6.698-107.063  | 14.002 | 1.00 | 77.84  |
| C    |      |     |     |   |     |                |        |      |        |
| ATOM | 1465 | C   | ALA | X | 625 | 8.179-107.408  | 13.930 | 1.00 | 79.33  |
| C    |      |     |     |   |     |                |        |      |        |
| ATOM | 1466 | O   | ALA | X | 625 | 8.622-108.075  | 12.989 | 1.00 | 77.04  |
| O    |      |     |     |   |     |                |        |      |        |
| ATOM | 1467 | CB  | ALA | X | 625 | 5.958-108.218  | 14.695 | 1.00 | 76.11  |
| C    |      |     |     |   |     |                |        |      |        |
| ATOM | 1468 | N   | ILE | X | 626 | 8.894-107.096  | 14.999 | 1.00 | 84.70  |
| N    |      |     |     |   |     |                |        |      |        |
| ATOM | 1469 | CA  | ILE | X | 626 | 10.239-107.611 | 15.226 | 1.00 | 88.47  |
| C    |      |     |     |   |     |                |        |      |        |
| ATOM | 1470 | C   | ILE | X | 626 | 10.299-108.377 | 16.533 | 1.00 | 97.20  |
| C    |      |     |     |   |     |                |        |      |        |
| ATOM | 1471 | O   | ILE | X | 626 | 9.568-108.081  | 17.481 | 1.00 | 110.11 |
| O    |      |     |     |   |     |                |        |      |        |
| ATOM | 1472 | CB  | ILE | X | 626 | 11.336-106.545 | 15.039 | 1.00 | 84.08  |
| C    |      |     |     |   |     |                |        |      |        |
| ATOM | 1473 | CG1 | ILE | X | 626 | 10.947-105.069 | 15.270 | 1.00 | 83.28  |
| C    |      |     |     |   |     |                |        |      |        |
| ATOM | 1474 | CG2 | ILE | X | 626 | 11.804-106.665 | 13.586 | 1.00 | 82.18  |
| C    |      |     |     |   |     |                |        |      |        |
| ATOM | 1475 | CD1 | ILE | X | 626 | 10.445-104.743 | 16.674 | 1.00 | 83.87  |
| C    |      |     |     |   |     |                |        |      |        |

|      |      |     |           |                |        |            |
|------|------|-----|-----------|----------------|--------|------------|
| ATOM | 1476 | N   | GLY X 627 | 11.049-109.474 | 16.477 | 1.00102.05 |
| N    |      |     |           |                |        |            |
| ATOM | 1477 | CA  | GLY X 627 | 10.923-110.587 | 17.393 | 1.00108.63 |
| C    |      |     |           |                |        |            |
| ATOM | 1478 | C   | GLY X 627 | 12.267-111.125 | 17.860 | 1.00111.37 |
| C    |      |     |           |                |        |            |
| ATOM | 1479 | O   | GLY X 627 | 13.202-111.276 | 17.075 | 1.00123.51 |
| O    |      |     |           |                |        |            |
| ATOM | 1480 | N   | LYS X 628 | 12.336-111.459 | 19.147 | 1.00101.85 |
| N    |      |     |           |                |        |            |
| ATOM | 1481 | CA  | LYS X 628 | 13.433-112.209 | 19.769 | 1.00 92.98 |
| C    |      |     |           |                |        |            |
| ATOM | 1482 | C   | LYS X 628 | 12.918-113.608 | 20.082 | 1.00 89.13 |
| C    |      |     |           |                |        |            |
| ATOM | 1483 | O   | LYS X 628 | 11.957-113.724 | 20.843 | 1.00 83.47 |
| O    |      |     |           |                |        |            |
| ATOM | 1484 | CB  | LYS X 628 | 13.871-111.522 | 21.071 | 1.00 96.63 |
| C    |      |     |           |                |        |            |
| ATOM | 1485 | CG  | LYS X 628 | 14.406-110.082 | 20.909 | 1.00100.96 |
| C    |      |     |           |                |        |            |
| ATOM | 1486 | CD  | LYS X 628 | 14.516-109.323 | 22.263 | 1.00105.26 |
| C    |      |     |           |                |        |            |
| ATOM | 1487 | CE  | LYS X 628 | 15.026-110.058 | 23.521 | 1.00109.21 |
| C    |      |     |           |                |        |            |
| ATOM | 1488 | NZ  | LYS X 628 | 14.388-109.576 | 24.771 | 1.00105.21 |
| N1+  |      |     |           |                |        |            |
| ATOM | 1489 | N   | VAL X 629 | 13.555-114.660 | 19.572 | 1.00 86.79 |
| N    |      |     |           |                |        |            |
| ATOM | 1490 | CA  | VAL X 629 | 13.239-116.037 | 19.998 | 1.00 84.08 |
| C    |      |     |           |                |        |            |
| ATOM | 1491 | C   | VAL X 629 | 13.699-116.282 | 21.422 | 1.00 88.44 |
| C    |      |     |           |                |        |            |
| ATOM | 1492 | O   | VAL X 629 | 14.736-115.772 | 21.851 | 1.00 90.27 |
| O    |      |     |           |                |        |            |
| ATOM | 1493 | CB  | VAL X 629 | 13.678-117.155 | 19.024 | 1.00 82.52 |
| C    |      |     |           |                |        |            |
| ATOM | 1494 | CG1 | VAL X 629 | 14.646-116.701 | 17.948 | 1.00 81.63 |
| C    |      |     |           |                |        |            |
| ATOM | 1495 | CG2 | VAL X 629 | 14.182-118.415 | 19.709 | 1.00 84.34 |
| C    |      |     |           |                |        |            |
| ATOM | 1496 | N   | LEU X 630 | 12.920-117.095 | 22.134 | 1.00 92.84 |
| N    |      |     |           |                |        |            |
| ATOM | 1497 | CA  | LEU X 630 | 13.108-117.323 | 23.553 | 1.00 96.89 |
| C    |      |     |           |                |        |            |
| ATOM | 1498 | C   | LEU X 630 | 13.416-118.779 | 23.824 | 1.00 99.31 |
| C    |      |     |           |                |        |            |
| ATOM | 1499 | O   | LEU X 630 | 14.503-119.100 | 24.255 | 1.00 93.11 |
| O    |      |     |           |                |        |            |
| ATOM | 1500 | CB  | LEU X 630 | 11.847-116.906 | 24.300 | 1.00 98.45 |
| C    |      |     |           |                |        |            |
| ATOM | 1501 | CG  | LEU X 630 | 11.526-115.409 | 24.148 | 1.00 98.57 |
| C    |      |     |           |                |        |            |
| ATOM | 1502 | CD1 | LEU X 630 | 10.097-115.165 | 24.609 | 1.00 97.37 |
| C    |      |     |           |                |        |            |

|      |      |     |     |   |     |                |        |            |
|------|------|-----|-----|---|-----|----------------|--------|------------|
| ATOM | 1503 | CD2 | LEU | X | 630 | 12.469-114.516 | 24.958 | 1.00103.72 |
| C    |      |     |     |   |     |                |        |            |
| ATOM | 1504 | N   | LYS | X | 631 | 12.425-119.646 | 23.589 | 1.00109.53 |
| N    |      |     |     |   |     |                |        |            |
| ATOM | 1505 | CA  | LYS | X | 631 | 12.569-121.093 | 23.779 | 1.00122.66 |
| C    |      |     |     |   |     |                |        |            |
| ATOM | 1506 | C   | LYS | X | 631 | 12.563-121.750 | 22.417 | 1.00126.47 |
| C    |      |     |     |   |     |                |        |            |
| ATOM | 1507 | O   | LYS | X | 631 | 12.696-121.087 | 21.388 | 1.00135.07 |
| O    |      |     |     |   |     |                |        |            |
| ATOM | 1508 | CB  | LYS | X | 631 | 11.425-121.668 | 24.645 | 1.00132.96 |
| C    |      |     |     |   |     |                |        |            |
| ATOM | 1509 | CG  | LYS | X | 631 | 11.877-122.737 | 25.657 | 1.00143.81 |
| C    |      |     |     |   |     |                |        |            |
| ATOM | 1510 | CD  | LYS | X | 631 | 10.710-123.577 | 26.202 | 1.00151.74 |
| C    |      |     |     |   |     |                |        |            |
| ATOM | 1511 | CE  | LYS | X | 631 | 10.984-124.116 | 27.608 | 1.00151.44 |
| C    |      |     |     |   |     |                |        |            |
| ATOM | 1512 | NZ  | LYS | X | 631 | 10.998-123.014 | 28.609 | 1.00155.44 |
| N1+  |      |     |     |   |     |                |        |            |
| ATOM | 1513 | N   | LEU | X | 632 | 12.460-123.064 | 22.413 | 1.00127.75 |
| N    |      |     |     |   |     |                |        |            |
| ATOM | 1514 | CA  | LEU | X | 632 | 12.219-123.808 | 21.202 | 1.00127.02 |
| C    |      |     |     |   |     |                |        |            |
| ATOM | 1515 | C   | LEU | X | 632 | 11.306-124.974 | 21.618 | 1.00126.84 |
| C    |      |     |     |   |     |                |        |            |
| ATOM | 1516 | O   | LEU | X | 632 | 11.597-125.685 | 22.557 | 1.00139.32 |
| O    |      |     |     |   |     |                |        |            |
| ATOM | 1517 | CB  | LEU | X | 632 | 13.571-124.304 | 20.609 | 1.00126.28 |
| C    |      |     |     |   |     |                |        |            |
| ATOM | 1518 | CG  | LEU | X | 632 | 14.813-123.357 | 20.509 | 1.00121.83 |
| C    |      |     |     |   |     |                |        |            |
| ATOM | 1519 | CD1 | LEU | X | 632 | 15.837-123.522 | 21.656 | 1.00114.98 |
| C    |      |     |     |   |     |                |        |            |
| ATOM | 1520 | CD2 | LEU | X | 632 | 15.495-123.565 | 19.161 | 1.00119.28 |
| C    |      |     |     |   |     |                |        |            |
| ATOM | 1521 | N   | VAL | X | 633 | 10.153-125.106 | 20.997 | 1.00126.82 |
| N    |      |     |     |   |     |                |        |            |
| ATOM | 1522 | CA  | VAL | X | 633 | 9.101-125.934  | 21.569 | 1.00133.19 |
| C    |      |     |     |   |     |                |        |            |
| ATOM | 1523 | C   | VAL | X | 633 | 8.962-127.235  | 20.753 | 1.00148.69 |
| C    |      |     |     |   |     |                |        |            |
| ATOM | 1524 | O   | VAL | X | 633 | 9.218-127.224  | 19.524 | 1.00150.88 |
| O    |      |     |     |   |     |                |        |            |
| ATOM | 1525 | CB  | VAL | X | 633 | 7.816-125.098  | 21.672 | 1.00130.17 |
| C    |      |     |     |   |     |                |        |            |
| ATOM | 1526 | CG1 | VAL | X | 633 | 6.647-125.900  | 22.231 | 1.00134.04 |
| C    |      |     |     |   |     |                |        |            |
| ATOM | 1527 | CG2 | VAL | X | 633 | 8.095-123.888  | 22.547 | 1.00126.36 |
| C    |      |     |     |   |     |                |        |            |
| ATOM | 1528 | N   | PRO | X | 634 | 8.610-128.371  | 21.438 | 1.00160.34 |
| N    |      |     |     |   |     |                |        |            |
| ATOM | 1529 | CA  | PRO | X | 634 | 9.475-129.547  | 21.402 | 1.00161.28 |
| C    |      |     |     |   |     |                |        |            |

|      |      |     |     |   |     |                |        |            |
|------|------|-----|-----|---|-----|----------------|--------|------------|
| ATOM | 1530 | C   | PRO | X | 634 | 10.814-129.337 | 20.708 | 1.00156.32 |
| C    |      |     |     |   |     |                |        |            |
| ATOM | 1531 | OXT | PRO | X | 634 | 10.911-129.461 | 19.462 | 1.00156.32 |
| O1-  |      |     |     |   |     |                |        |            |
| ATOM | 1532 | O   | PRO | X | 634 | 11.798-129.045 | 21.382 | 1.00146.40 |
| O    |      |     |     |   |     |                |        |            |
| ATOM | 1533 | CB  | PRO | X | 634 | 8.608-130.580  | 20.660 | 1.00163.08 |
| C    |      |     |     |   |     |                |        |            |
| ATOM | 1534 | CG  | PRO | X | 634 | 7.211-130.261  | 21.124 | 1.00164.23 |
| C    |      |     |     |   |     |                |        |            |
| ATOM | 1535 | CD  | PRO | X | 634 | 7.207-128.811  | 21.620 | 1.00162.02 |
| C    |      |     |     |   |     |                |        |            |
| ATOM | 1536 | N   | ASN | X | 48  | 31.902-105.502 | 46.430 | 1.00125.37 |
| N    |      |     |     |   |     |                |        |            |
| ATOM | 1537 | CA  | ASN | X | 48  | 31.264-104.360 | 45.710 | 1.00128.31 |
| C    |      |     |     |   |     |                |        |            |
| ATOM | 1538 | C   | ASN | X | 48  | 31.560-104.384 | 44.199 | 1.00140.73 |
| C    |      |     |     |   |     |                |        |            |
| ATOM | 1539 | O   | ASN | X | 48  | 32.097-105.389 | 43.679 | 1.00162.58 |
| O    |      |     |     |   |     |                |        |            |
| ATOM | 1540 | CB  | ASN | X | 48  | 31.649-103.024 | 46.387 | 1.00117.37 |
| C    |      |     |     |   |     |                |        |            |
| ATOM | 1541 | CG  | ASN | X | 48  | 30.840-102.762 | 47.685 | 1.00130.57 |
| C    |      |     |     |   |     |                |        |            |
| ATOM | 1542 | OD1 | ASN | X | 48  | 29.671-102.362 | 47.639 | 1.00122.71 |
| O    |      |     |     |   |     |                |        |            |
| ATOM | 1543 | ND2 | ASN | X | 48  | 31.455-103.016 | 48.839 | 1.00126.08 |
| N    |      |     |     |   |     |                |        |            |
| ATOM | 1544 | N   | PHE | X | 49  | 31.027-103.383 | 43.488 | 1.00173.09 |
| N    |      |     |     |   |     |                |        |            |
| ATOM | 1545 | CA  | PHE | X | 49  | 30.893-103.413 | 42.018 | 1.00184.71 |
| C    |      |     |     |   |     |                |        |            |
| ATOM | 1546 | C   | PHE | X | 49  | 31.352-102.068 | 41.422 | 1.00181.62 |
| C    |      |     |     |   |     |                |        |            |
| ATOM | 1547 | O   | PHE | X | 49  | 31.503-101.087 | 42.162 | 1.00204.46 |
| O    |      |     |     |   |     |                |        |            |
| ATOM | 1548 | CB  | PHE | X | 49  | 29.433-103.767 | 41.601 | 1.00180.79 |
| C    |      |     |     |   |     |                |        |            |
| ATOM | 1549 | CG  | PHE | X | 49  | 28.639-102.613 | 40.991 | 1.00176.33 |
| C    |      |     |     |   |     |                |        |            |
| ATOM | 1550 | CD1 | PHE | X | 49  | 28.499-101.402 | 41.661 | 1.00179.92 |
| C    |      |     |     |   |     |                |        |            |
| ATOM | 1551 | CD2 | PHE | X | 49  | 27.923-102.794 | 39.802 | 1.00149.85 |
| C    |      |     |     |   |     |                |        |            |
| ATOM | 1552 | CE1 | PHE | X | 49  | 27.751-100.367 | 41.111 | 1.00148.94 |
| C    |      |     |     |   |     |                |        |            |
| ATOM | 1553 | CE2 | PHE | X | 49  | 27.160-101.766 | 39.261 | 1.00129.73 |
| C    |      |     |     |   |     |                |        |            |
| ATOM | 1554 | CZ  | PHE | X | 49  | 27.068-100.555 | 39.923 | 1.00128.99 |
| C    |      |     |     |   |     |                |        |            |
| ATOM | 1555 | N   | ASP | X | 50  | 31.639-102.056 | 40.115 | 1.00151.38 |
| N    |      |     |     |   |     |                |        |            |
| ATOM | 1556 | CA  | ASP | X | 50  | 32.306-100.909 | 39.486 | 1.00159.51 |
| C    |      |     |     |   |     |                |        |            |

|      |      |     |     |   |    |        |          |        |            |
|------|------|-----|-----|---|----|--------|----------|--------|------------|
| ATOM | 1557 | C   | ASP | X | 50 | 31.339 | -99.742  | 39.231 | 1.00156.54 |
| C    |      |     |     |   |    |        |          |        |            |
| ATOM | 1558 | O   | ASP | X | 50 | 30.506 | -99.772  | 38.310 | 1.00197.58 |
| O    |      |     |     |   |    |        |          |        |            |
| ATOM | 1559 | CB  | ASP | X | 50 | 33.015 | -101.297 | 38.196 | 1.00182.79 |
| C    |      |     |     |   |    |        |          |        |            |
| ATOM | 1560 | CG  | ASP | X | 50 | 33.917 | -100.185 | 37.675 | 1.00202.99 |
| C    |      |     |     |   |    |        |          |        |            |
| ATOM | 1561 | OD1 | ASP | X | 50 | 34.587 | -99.511  | 38.499 | 1.00189.89 |
| O    |      |     |     |   |    |        |          |        |            |
| ATOM | 1562 | OD2 | ASP | X | 50 | 33.933 | -99.964  | 36.447 | 1.00233.82 |
| O1-  |      |     |     |   |    |        |          |        |            |
| ATOM | 1563 | N   | THR | X | 51 | 31.488 | -98.701  | 40.046 | 1.00156.62 |
| N    |      |     |     |   |    |        |          |        |            |
| ATOM | 1564 | CA  | THR | X | 51 | 30.524 | -97.570  | 40.055 | 1.00160.70 |
| C    |      |     |     |   |    |        |          |        |            |
| ATOM | 1565 | C   | THR | X | 51 | 30.542 | -96.676  | 38.797 | 1.00172.96 |
| C    |      |     |     |   |    |        |          |        |            |
| ATOM | 1566 | O   | THR | X | 51 | 29.669 | -95.835  | 38.619 | 1.00154.74 |
| O    |      |     |     |   |    |        |          |        |            |
| ATOM | 1567 | CB  | THR | X | 51 | 30.695 | -96.654  | 41.308 | 1.00158.81 |
| C    |      |     |     |   |    |        |          |        |            |
| ATOM | 1568 | OG1 | THR | X | 51 | 31.175 | -95.363  | 40.911 | 1.00142.27 |
| O    |      |     |     |   |    |        |          |        |            |
| ATOM | 1569 | CG2 | THR | X | 51 | 31.648 | -97.263  | 42.360 | 1.00156.32 |
| C    |      |     |     |   |    |        |          |        |            |
| ATOM | 1570 | N   | SER | X | 52 | 31.544 | -96.858  | 37.936 | 1.00195.53 |
| N    |      |     |     |   |    |        |          |        |            |
| ATOM | 1571 | CA  | SER | X | 52 | 31.633 | -96.110  | 36.669 | 1.00177.55 |
| C    |      |     |     |   |    |        |          |        |            |
| ATOM | 1572 | C   | SER | X | 52 | 30.819 | -96.765  | 35.539 | 1.00159.98 |
| C    |      |     |     |   |    |        |          |        |            |
| ATOM | 1573 | O   | SER | X | 52 | 30.526 | -96.122  | 34.537 | 1.00167.99 |
| O    |      |     |     |   |    |        |          |        |            |
| ATOM | 1574 | CB  | SER | X | 52 | 33.096 | -95.988  | 36.226 | 1.00154.17 |
| C    |      |     |     |   |    |        |          |        |            |
| ATOM | 1575 | OG  | SER | X | 52 | 33.802 | -97.197  | 36.454 | 1.00134.16 |
| O    |      |     |     |   |    |        |          |        |            |
| ATOM | 1576 | N   | LEU | X | 53 | 30.432 | -98.019  | 35.757 | 1.00155.04 |
| N    |      |     |     |   |    |        |          |        |            |
| ATOM | 1577 | CA  | LEU | X | 53 | 29.725 | -98.805  | 34.737 | 1.00152.54 |
| C    |      |     |     |   |    |        |          |        |            |
| ATOM | 1578 | C   | LEU | X | 53 | 28.297 | -98.280  | 34.419 | 1.00145.38 |
| C    |      |     |     |   |    |        |          |        |            |
| ATOM | 1579 | O   | LEU | X | 53 | 27.902 | -98.192  | 33.245 | 1.00170.24 |
| O    |      |     |     |   |    |        |          |        |            |
| ATOM | 1580 | CB  | LEU | X | 53 | 29.622 | -100.290 | 35.141 | 1.00 0.00  |
| C    |      |     |     |   |    |        |          |        |            |
| ATOM | 1581 | CG  | LEU | X | 53 | 30.917 | -101.126 | 35.070 | 1.00 0.00  |
| C    |      |     |     |   |    |        |          |        |            |
| ATOM | 1582 | CD1 | LEU | X | 53 | 30.560 | -102.600 | 35.337 | 1.00 0.00  |
| C    |      |     |     |   |    |        |          |        |            |
| ATOM | 1583 | CD2 | LEU | X | 53 | 31.637 | -101.030 | 33.713 | 1.00 0.00  |
| C    |      |     |     |   |    |        |          |        |            |

|      |      |     |     |   |    |        |         |        |            |
|------|------|-----|-----|---|----|--------|---------|--------|------------|
| ATOM | 1584 | N   | PRO | X | 54 | 27.519 | -97.940 | 35.458 | 1.00125.77 |
| N    |      |     |     |   |    |        |         |        |            |
| ATOM | 1585 | CA  | PRO | X | 54 | 26.115 | -97.563 | 35.180 | 1.00130.40 |
| C    |      |     |     |   |    |        |         |        |            |
| ATOM | 1586 | C   | PRO | X | 54 | 26.006 | -96.218 | 34.460 | 1.00124.43 |
| C    |      |     |     |   |    |        |         |        |            |
| ATOM | 1587 | O   | PRO | X | 54 | 25.100 | -96.040 | 33.663 | 1.00123.93 |
| O    |      |     |     |   |    |        |         |        |            |
| ATOM | 1588 | CB  | PRO | X | 54 | 25.490 | -97.466 | 36.574 | 1.00119.53 |
| C    |      |     |     |   |    |        |         |        |            |
| ATOM | 1589 | CG  | PRO | X | 54 | 26.376 | -98.277 | 37.453 | 1.00120.80 |
| C    |      |     |     |   |    |        |         |        |            |
| ATOM | 1590 | CD  | PRO | X | 54 | 27.761 | -98.119 | 36.896 | 1.00120.38 |
| C    |      |     |     |   |    |        |         |        |            |
| ATOM | 1591 | N   | THR | X | 55 | 26.932 | -95.294 | 34.725 | 1.00128.90 |
| N    |      |     |     |   |    |        |         |        |            |
| ATOM | 1592 | CA  | THR | X | 55 | 26.905 | -93.964 | 34.125 | 1.00140.15 |
| C    |      |     |     |   |    |        |         |        |            |
| ATOM | 1593 | C   | THR | X | 55 | 27.344 | -93.934 | 32.639 | 1.00159.94 |
| C    |      |     |     |   |    |        |         |        |            |
| ATOM | 1594 | O   | THR | X | 55 | 27.079 | -92.961 | 31.917 | 1.00189.44 |
| O    |      |     |     |   |    |        |         |        |            |
| ATOM | 1595 | CB  | THR | X | 55 | 27.807 | -92.998 | 34.928 | 1.00140.66 |
| C    |      |     |     |   |    |        |         |        |            |
| ATOM | 1596 | OG1 | THR | X | 55 | 27.664 | -91.672 | 34.420 | 1.00166.79 |
| O    |      |     |     |   |    |        |         |        |            |
| ATOM | 1597 | CG2 | THR | X | 55 | 29.286 | -93.410 | 34.852 | 1.00132.93 |
| C    |      |     |     |   |    |        |         |        |            |
| ATOM | 1598 | N   | SER | X | 56 | 28.019 | -94.995 | 32.207 | 1.00143.79 |
| N    |      |     |     |   |    |        |         |        |            |
| ATOM | 1599 | CA  | SER | X | 56 | 28.468 | -95.137 | 30.818 | 1.00130.29 |
| C    |      |     |     |   |    |        |         |        |            |
| ATOM | 1600 | C   | SER | X | 56 | 27.468 | -95.894 | 29.930 | 1.00119.11 |
| C    |      |     |     |   |    |        |         |        |            |
| ATOM | 1601 | O   | SER | X | 56 | 27.749 | -96.142 | 28.756 | 1.00179.85 |
| O    |      |     |     |   |    |        |         |        |            |
| ATOM | 1602 | CB  | SER | X | 56 | 29.858 | -95.791 | 30.762 | 1.00124.69 |
| C    |      |     |     |   |    |        |         |        |            |
| ATOM | 1603 | OG  | SER | X | 56 | 29.970 | -96.856 | 31.682 | 1.00125.22 |
| O    |      |     |     |   |    |        |         |        |            |
| ATOM | 1604 | N   | HIE | X | 57 | 26.328 | -96.288 | 30.503 | 1.00111.08 |
| N    |      |     |     |   |    |        |         |        |            |
| ATOM | 1605 | CA  | HIE | X | 57 | 25.189 | -96.865 | 29.772 | 1.00112.92 |
| C    |      |     |     |   |    |        |         |        |            |
| ATOM | 1606 | C   | HIE | X | 57 | 25.553 | -97.949 | 28.795 | 1.00123.68 |
| C    |      |     |     |   |    |        |         |        |            |
| ATOM | 1607 | O   | HIE | X | 57 | 25.123 | -97.943 | 27.631 | 1.00116.65 |
| O    |      |     |     |   |    |        |         |        |            |
| ATOM | 1608 | CB  | HIE | X | 57 | 24.407 | -95.788 | 29.070 | 1.00101.12 |
| C    |      |     |     |   |    |        |         |        |            |
| ATOM | 1609 | CG  | HIE | X | 57 | 23.854 | -94.772 | 29.995 | 1.00 95.45 |
| C    |      |     |     |   |    |        |         |        |            |
| ATOM | 1610 | ND1 | HIE | X | 57 | 22.541 | -94.781 | 30.401 | 1.00 91.88 |
| N    |      |     |     |   |    |        |         |        |            |

|      |      |     |     |   |    |        |          |        |            |
|------|------|-----|-----|---|----|--------|----------|--------|------------|
| ATOM | 1611 | CD2 | HIE | X | 57 | 24.445 | -93.743  | 30.643 | 1.00109.12 |
| C    |      |     |     |   |    |        |          |        |            |
| ATOM | 1612 | CE1 | HIE | X | 57 | 22.336 | -93.775  | 31.229 | 1.00115.62 |
| C    |      |     |     |   |    |        |          |        |            |
| ATOM | 1613 | NE2 | HIE | X | 57 | 23.476 | -93.130  | 31.394 | 1.00125.04 |
| N    |      |     |     |   |    |        |          |        |            |
| ATOM | 1614 | N   | THR | X | 58 | 26.318 | -98.916  | 29.291 | 1.00131.84 |
| N    |      |     |     |   |    |        |          |        |            |
| ATOM | 1615 | CA  | THR | X | 58 | 26.866 | -99.965  | 28.441 | 1.00124.55 |
| C    |      |     |     |   |    |        |          |        |            |
| ATOM | 1616 | C   | THR | X | 58 | 25.758 | -100.837 | 27.831 | 1.00115.80 |
| C    |      |     |     |   |    |        |          |        |            |
| ATOM | 1617 | O   | THR | X | 58 | 25.973 | -101.467 | 26.795 | 1.00168.59 |
| O    |      |     |     |   |    |        |          |        |            |
| ATOM | 1618 | CB  | THR | X | 58 | 27.883 | -100.861 | 29.186 | 1.00133.15 |
| C    |      |     |     |   |    |        |          |        |            |
| ATOM | 1619 | OG1 | THR | X | 58 | 27.833 | -100.593 | 30.590 | 1.00162.70 |
| O    |      |     |     |   |    |        |          |        |            |
| ATOM | 1620 | CG2 | THR | X | 58 | 29.305 | -100.603 | 28.683 | 1.00133.77 |
| C    |      |     |     |   |    |        |          |        |            |
| ATOM | 1621 | N   | TYR | X | 59 | 24.584 | -100.844 | 28.465 | 1.00 94.03 |
| N    |      |     |     |   |    |        |          |        |            |
| ATOM | 1622 | CA  | TYR | X | 59 | 23.395 | -101.581 | 28.055 | 1.00 97.82 |
| C    |      |     |     |   |    |        |          |        |            |
| ATOM | 1623 | C   | TYR | X | 59 | 22.781 | -101.040 | 26.745 | 1.00 91.11 |
| C    |      |     |     |   |    |        |          |        |            |
| ATOM | 1624 | O   | TYR | X | 59 | 21.733 | -101.534 | 26.299 | 1.00104.88 |
| O    |      |     |     |   |    |        |          |        |            |
| ATOM | 1625 | CB  | TYR | X | 59 | 22.415 | -101.540 | 29.240 | 1.00107.61 |
| C    |      |     |     |   |    |        |          |        |            |
| ATOM | 1626 | CG  | TYR | X | 59 | 21.839 | -100.158 | 29.492 | 1.00107.66 |
| C    |      |     |     |   |    |        |          |        |            |
| ATOM | 1627 | CD1 | TYR | X | 59 | 22.434 | -99.258  | 30.397 | 1.00 90.25 |
| C    |      |     |     |   |    |        |          |        |            |
| ATOM | 1628 | CD2 | TYR | X | 59 | 20.717 | -99.759  | 28.756 | 1.00106.21 |
| C    |      |     |     |   |    |        |          |        |            |
| ATOM | 1629 | CE1 | TYR | X | 59 | 21.920 | -97.952  | 30.522 | 1.00 81.56 |
| C    |      |     |     |   |    |        |          |        |            |
| ATOM | 1630 | CE2 | TYR | X | 59 | 20.206 | -98.459  | 28.866 | 1.00 92.55 |
| C    |      |     |     |   |    |        |          |        |            |
| ATOM | 1631 | CZ  | TYR | X | 59 | 20.812 | -97.542  | 29.743 | 1.00 89.84 |
| C    |      |     |     |   |    |        |          |        |            |
| ATOM | 1632 | OH  | TYR | X | 59 | 20.333 | -96.273  | 29.803 | 1.00108.93 |
| O    |      |     |     |   |    |        |          |        |            |
| ATOM | 1633 | N   | LEU | X | 60 | 23.403 | -100.010 | 26.137 | 1.00132.73 |
| N    |      |     |     |   |    |        |          |        |            |
| ATOM | 1634 | CA  | LEU | X | 60 | 22.908 | -99.377  | 24.948 | 1.00120.89 |
| C    |      |     |     |   |    |        |          |        |            |
| ATOM | 1635 | C   | LEU | X | 60 | 23.611 | -99.900  | 23.708 | 1.00128.92 |
| C    |      |     |     |   |    |        |          |        |            |
| ATOM | 1636 | O   | LEU | X | 60 | 23.220 | -99.634  | 22.594 | 1.00137.67 |
| O    |      |     |     |   |    |        |          |        |            |
| ATOM | 1637 | CB  | LEU | X | 60 | 23.128 | -97.886  | 25.074 | 1.00112.89 |
| C    |      |     |     |   |    |        |          |        |            |



|      |      |     |     |   |    |        |          |        |            |
|------|------|-----|-----|---|----|--------|----------|--------|------------|
| ATOM | 1638 | CG  | LEU | X | 60 | 21.919 | -97.067  | 25.461 | 1.00111.52 |
| C    |      |     |     |   |    |        |          |        |            |
| ATOM | 1639 | CD1 | LEU | X | 60 | 22.286 | -95.585  | 25.352 | 1.00110.74 |
| C    |      |     |     |   |    |        |          |        |            |
| ATOM | 1640 | CD2 | LEU | X | 60 | 20.715 | -97.379  | 24.571 | 1.00112.54 |
| C    |      |     |     |   |    |        |          |        |            |
| ATOM | 1641 | N   | GLY | X | 61 | 24.708 | -100.587 | 23.913 | 1.00133.64 |
| N    |      |     |     |   |    |        |          |        |            |
| ATOM | 1642 | CA  | GLY | X | 61 | 25.537 | -100.979 | 22.798 | 1.00136.36 |
| C    |      |     |     |   |    |        |          |        |            |
| ATOM | 1643 | C   | GLY | X | 61 | 26.982 | -100.586 | 22.940 | 1.00141.73 |
| C    |      |     |     |   |    |        |          |        |            |
| ATOM | 1644 | O   | GLY | X | 61 | 27.356 | -99.671  | 23.652 | 1.00124.34 |
| O    |      |     |     |   |    |        |          |        |            |
| ATOM | 1645 | N   | ALA | X | 62 | 27.838 | -101.313 | 22.239 | 1.00162.30 |
| N    |      |     |     |   |    |        |          |        |            |
| ATOM | 1646 | CA  | ALA | X | 62 | 29.209 | -101.454 | 22.675 | 1.00174.18 |
| C    |      |     |     |   |    |        |          |        |            |
| ATOM | 1647 | C   | ALA | X | 62 | 30.045 | -100.200 | 22.442 | 1.00177.39 |
| C    |      |     |     |   |    |        |          |        |            |
| ATOM | 1648 | O   | ALA | X | 62 | 30.736 | -99.692  | 23.334 | 1.00156.92 |
| O    |      |     |     |   |    |        |          |        |            |
| ATOM | 1649 | CB  | ALA | X | 62 | 29.846 | -102.643 | 21.948 | 1.00177.46 |
| C    |      |     |     |   |    |        |          |        |            |
| ATOM | 1650 | N   | ASP | X | 63 | 29.992 | -99.718  | 21.207 | 1.00179.31 |
| N    |      |     |     |   |    |        |          |        |            |
| ATOM | 1651 | CA  | ASP | X | 63 | 30.569 | -98.437  | 20.853 | 1.00174.71 |
| C    |      |     |     |   |    |        |          |        |            |
| ATOM | 1652 | C   | ASP | X | 63 | 29.583 | -97.525  | 20.075 | 1.00168.20 |
| C    |      |     |     |   |    |        |          |        |            |
| ATOM | 1653 | O   | ASP | X | 63 | 28.865 | -97.970  | 19.184 | 1.00156.53 |
| O    |      |     |     |   |    |        |          |        |            |
| ATOM | 1654 | CB  | ASP | X | 63 | 31.838 | -98.647  | 19.976 | 1.00 0.00  |
| C    |      |     |     |   |    |        |          |        |            |
| ATOM | 1655 | CG  | ASP | X | 63 | 32.531 | -97.340  | 19.581 | 1.00 0.00  |
| C    |      |     |     |   |    |        |          |        |            |
| ATOM | 1656 | OD1 | ASP | X | 63 | 32.358 | -96.780  | 18.500 | 1.00 0.00  |
| O    |      |     |     |   |    |        |          |        |            |
| ATOM | 1657 | OD2 | ASP | X | 63 | 33.360 | -96.843  | 20.545 | 1.00 0.00  |
| O1-  |      |     |     |   |    |        |          |        |            |
| ATOM | 1658 | N   | MET | X | 64 | 29.546 | -96.256  | 20.467 | 1.00159.28 |
| N    |      |     |     |   |    |        |          |        |            |
| ATOM | 1659 | CA  | MET | X | 64 | 28.889 | -95.258  | 19.692 | 1.00146.23 |
| C    |      |     |     |   |    |        |          |        |            |
| ATOM | 1660 | C   | MET | X | 64 | 29.945 | -94.261  | 19.287 | 1.00135.45 |
| C    |      |     |     |   |    |        |          |        |            |
| ATOM | 1661 | O   | MET | X | 64 | 30.932 | -94.107  | 19.984 | 1.00133.54 |
| O    |      |     |     |   |    |        |          |        |            |
| ATOM | 1662 | CB  | MET | X | 64 | 27.866 | -94.525  | 20.547 | 1.00143.90 |
| C    |      |     |     |   |    |        |          |        |            |
| ATOM | 1663 | CG  | MET | X | 64 | 27.332 | -95.344  | 21.707 | 1.00144.71 |
| C    |      |     |     |   |    |        |          |        |            |
| ATOM | 1664 | SD  | MET | X | 64 | 25.637 | -94.916  | 22.157 | 1.00139.32 |
| S    |      |     |     |   |    |        |          |        |            |

|      |      |     |     |   |    |        |         |        |            |
|------|------|-----|-----|---|----|--------|---------|--------|------------|
| ATOM | 1665 | CE  | MET | X | 64 | 25.436 | -96.219 | 23.373 | 1.00145.87 |
| C    |      |     |     |   |    |        |         |        |            |
| ATOM | 1666 | N   | GLU | X | 65 | 29.737 | -93.568 | 18.176 | 1.00125.49 |
| N    |      |     |     |   |    |        |         |        |            |
| ATOM | 1667 | CA  | GLU | X | 65 | 30.602 | -92.435 | 17.784 | 1.00123.38 |
| C    |      |     |     |   |    |        |         |        |            |
| ATOM | 1668 | C   | GLU | X | 65 | 30.534 | -91.355 | 18.865 | 1.00122.91 |
| C    |      |     |     |   |    |        |         |        |            |
| ATOM | 1669 | O   | GLU | X | 65 | 29.478 | -90.967 | 19.311 | 1.00120.34 |
| O    |      |     |     |   |    |        |         |        |            |
| ATOM | 1670 | CB  | GLU | X | 65 | 30.142 | -91.845 | 16.363 | 1.00 0.00  |
| C    |      |     |     |   |    |        |         |        |            |
| ATOM | 1671 | CG  | GLU | X | 65 | 31.086 | -90.741 | 15.855 | 1.00 0.00  |
| C    |      |     |     |   |    |        |         |        |            |
| ATOM | 1672 | CD  | GLU | X | 65 | 32.531 | -91.229 | 15.723 | 1.00 0.00  |
| C    |      |     |     |   |    |        |         |        |            |
| ATOM | 1673 | OE1 | GLU | X | 65 | 32.916 | -91.980 | 14.829 | 1.00 0.00  |
| O    |      |     |     |   |    |        |         |        |            |
| ATOM | 1674 | OE2 | GLU | X | 65 | 33.360 | -90.760 | 16.701 | 1.00 0.00  |
| O1-  |      |     |     |   |    |        |         |        |            |
| ATOM | 1675 | N   | GLU | X | 66 | 31.697 | -90.866 | 19.289 | 1.00127.28 |
| N    |      |     |     |   |    |        |         |        |            |
| ATOM | 1676 | CA  | GLU | X | 66 | 31.777 | -89.919 | 20.408 | 1.00125.18 |
| C    |      |     |     |   |    |        |         |        |            |
| ATOM | 1677 | C   | GLU | X | 66 | 32.131 | -88.527 | 19.894 | 1.00124.46 |
| C    |      |     |     |   |    |        |         |        |            |
| ATOM | 1678 | O   | GLU | X | 66 | 32.838 | -88.353 | 18.873 | 1.00122.38 |
| O    |      |     |     |   |    |        |         |        |            |
| ATOM | 1679 | CB  | GLU | X | 66 | 32.745 | -90.421 | 21.492 | 1.00131.38 |
| C    |      |     |     |   |    |        |         |        |            |
| ATOM | 1680 | CG  | GLU | X | 66 | 32.591 | -91.918 | 21.845 | 1.00138.14 |
| C    |      |     |     |   |    |        |         |        |            |
| ATOM | 1681 | CD  | GLU | X | 66 | 33.448 | -92.873 | 20.972 | 1.00151.23 |
| C    |      |     |     |   |    |        |         |        |            |
| ATOM | 1682 | OE1 | GLU | X | 66 | 34.510 | -92.433 | 20.461 | 1.00184.41 |
| O    |      |     |     |   |    |        |         |        |            |
| ATOM | 1683 | OE2 | GLU | X | 66 | 33.079 | -94.074 | 20.802 | 1.00134.30 |
| O1-  |      |     |     |   |    |        |         |        |            |
| ATOM | 1684 | N   | PHE | X | 67 | 31.648 | -87.518 | 20.605 | 1.00132.74 |
| N    |      |     |     |   |    |        |         |        |            |
| ATOM | 1685 | CA  | PHE | X | 67 | 31.820 | -86.127 | 20.183 | 1.00136.86 |
| C    |      |     |     |   |    |        |         |        |            |
| ATOM | 1686 | C   | PHE | X | 67 | 32.402 | -85.352 | 21.348 | 1.00139.92 |
| C    |      |     |     |   |    |        |         |        |            |
| ATOM | 1687 | O   | PHE | X | 67 | 31.759 | -85.212 | 22.389 | 1.00133.94 |
| O    |      |     |     |   |    |        |         |        |            |
| ATOM | 1688 | CB  | PHE | X | 67 | 30.479 | -85.529 | 19.776 | 1.00127.84 |
| C    |      |     |     |   |    |        |         |        |            |
| ATOM | 1689 | CG  | PHE | X | 67 | 29.882 | -86.193 | 18.599 | 1.00109.06 |
| C    |      |     |     |   |    |        |         |        |            |
| ATOM | 1690 | CD1 | PHE | X | 67 | 29.447 | -87.487 | 18.704 | 1.00 98.88 |
| C    |      |     |     |   |    |        |         |        |            |
| ATOM | 1691 | CD2 | PHE | X | 67 | 29.922 | -85.576 | 17.355 | 1.00103.41 |
| C    |      |     |     |   |    |        |         |        |            |

|      |      |     |     |   |    |        |         |        |            |
|------|------|-----|-----|---|----|--------|---------|--------|------------|
| ATOM | 1692 | CE1 | PHE | X | 67 | 28.977 | -88.123 | 17.629 | 1.00101.35 |
| C    |      |     |     |   |    |        |         |        |            |
| ATOM | 1693 | CE2 | PHE | X | 67 | 29.438 | -86.201 | 16.259 | 1.00100.33 |
| C    |      |     |     |   |    |        |         |        |            |
| ATOM | 1694 | CZ  | PHE | X | 67 | 28.979 | -87.485 | 16.393 | 1.00105.48 |
| C    |      |     |     |   |    |        |         |        |            |
| ATOM | 1695 | N   | HIE | X | 68 | 33.639 | -84.865 | 21.153 | 1.00142.90 |
| N    |      |     |     |   |    |        |         |        |            |
| ATOM | 1696 | CA  | HIE | X | 68 | 34.324 | -84.038 | 22.136 | 1.00150.93 |
| C    |      |     |     |   |    |        |         |        |            |
| ATOM | 1697 | C   | HIE | X | 68 | 33.673 | -82.628 | 22.157 | 1.00164.35 |
| C    |      |     |     |   |    |        |         |        |            |
| ATOM | 1698 | O   | HIE | X | 68 | 33.981 | -81.749 | 21.322 | 1.00182.33 |
| O    |      |     |     |   |    |        |         |        |            |
| ATOM | 1699 | CB  | HIE | X | 68 | 35.834 | -83.958 | 21.820 | 1.00 0.00  |
| C    |      |     |     |   |    |        |         |        |            |
| ATOM | 1700 | CG  | HIE | X | 68 | 36.598 | -83.073 | 22.774 | 1.00 0.00  |
| C    |      |     |     |   |    |        |         |        |            |
| ATOM | 1701 | ND1 | HIE | X | 68 | 36.815 | -83.311 | 24.112 | 1.00 0.00  |
| N    |      |     |     |   |    |        |         |        |            |
| ATOM | 1702 | CE1 | HIE | X | 68 | 37.488 | -82.258 | 24.609 | 1.00 0.00  |
| C    |      |     |     |   |    |        |         |        |            |
| ATOM | 1703 | NE2 | HIE | X | 68 | 37.725 | -81.343 | 23.654 | 1.00 0.00  |
| N    |      |     |     |   |    |        |         |        |            |
| ATOM | 1704 | CD2 | HIE | X | 68 | 37.158 | -81.858 | 22.485 | 1.00 0.00  |
| C    |      |     |     |   |    |        |         |        |            |
| ATOM | 1705 | N   | GLY | X | 69 | 32.788 | -82.442 | 23.123 | 1.00170.83 |
| N    |      |     |     |   |    |        |         |        |            |
| ATOM | 1706 | CA  | GLY | X | 69 | 32.422 | -81.101 | 23.562 | 1.00167.37 |
| C    |      |     |     |   |    |        |         |        |            |
| ATOM | 1707 | C   | GLY | X | 69 | 31.451 | -80.341 | 22.670 | 1.00148.83 |
| C    |      |     |     |   |    |        |         |        |            |
| ATOM | 1708 | O   | GLY | X | 69 | 30.291 | -80.737 | 22.502 | 1.00159.69 |
| O    |      |     |     |   |    |        |         |        |            |
| ATOM | 1709 | N   | ARG | X | 70 | 31.940 | -79.314 | 21.974 | 1.00135.38 |
| N    |      |     |     |   |    |        |         |        |            |
| ATOM | 1710 | CA  | ARG | X | 70 | 32.360 | -77.993 | 22.535 | 1.00136.83 |
| C    |      |     |     |   |    |        |         |        |            |
| ATOM | 1711 | C   | ARG | X | 70 | 31.450 | -76.749 | 22.561 | 1.00128.31 |
| C    |      |     |     |   |    |        |         |        |            |
| ATOM | 1712 | O   | ARG | X | 70 | 31.943 | -75.633 | 22.729 | 1.00123.66 |
| O    |      |     |     |   |    |        |         |        |            |
| ATOM | 1713 | CB  | ARG | X | 70 | 33.548 | -77.556 | 21.689 | 1.00154.01 |
| C    |      |     |     |   |    |        |         |        |            |
| ATOM | 1714 | CG  | ARG | X | 70 | 33.325 | -77.768 | 20.171 | 1.00166.12 |
| C    |      |     |     |   |    |        |         |        |            |
| ATOM | 1715 | CD  | ARG | X | 70 | 31.846 | -77.858 | 19.697 | 1.00155.49 |
| C    |      |     |     |   |    |        |         |        |            |
| ATOM | 1716 | NE  | ARG | X | 70 | 31.765 | -77.639 | 18.266 | 1.00152.02 |
| N    |      |     |     |   |    |        |         |        |            |
| ATOM | 1717 | CZ  | ARG | X | 70 | 31.909 | -76.448 | 17.690 | 1.00161.92 |
| C    |      |     |     |   |    |        |         |        |            |
| ATOM | 1718 | NH1 | ARG | X | 70 | 31.929 | -76.358 | 16.365 | 1.00163.93 |
| N    |      |     |     |   |    |        |         |        |            |

|      |      |     |     |   |    |        |         |        |            |
|------|------|-----|-----|---|----|--------|---------|--------|------------|
| ATOM | 1719 | NH2 | ARG | X | 70 | 32.029 | -75.340 | 18.435 | 1.00161.46 |
| N1+  |      |     |     |   |    |        |         |        |            |
| ATOM | 1720 | N   | THR | X | 71 | 30.176 | -76.923 | 22.293 | 1.00132.43 |
| N    |      |     |     |   |    |        |         |        |            |
| ATOM | 1721 | CA  | THR | X | 71 | 29.336 | -75.798 | 21.858 | 1.00148.49 |
| C    |      |     |     |   |    |        |         |        |            |
| ATOM | 1722 | C   | THR | X | 71 | 28.552 | -75.230 | 23.042 | 1.00145.95 |
| C    |      |     |     |   |    |        |         |        |            |
| ATOM | 1723 | O   | THR | X | 71 | 27.629 | -75.888 | 23.535 | 1.00148.63 |
| O    |      |     |     |   |    |        |         |        |            |
| ATOM | 1724 | CB  | THR | X | 71 | 28.350 | -76.206 | 20.704 | 1.00159.70 |
| C    |      |     |     |   |    |        |         |        |            |
| ATOM | 1725 | OG1 | THR | X | 71 | 27.044 | -75.668 | 20.964 | 1.00166.09 |
| O    |      |     |     |   |    |        |         |        |            |
| ATOM | 1726 | CG2 | THR | X | 71 | 28.225 | -77.754 | 20.534 | 1.00160.16 |
| C    |      |     |     |   |    |        |         |        |            |
| ATOM | 1727 | N   | LEU | X | 72 | 28.941 | -74.034 | 23.523 | 1.00137.19 |
| N    |      |     |     |   |    |        |         |        |            |
| ATOM | 1728 | CA  | LEU | X | 72 | 28.078 | -73.240 | 24.409 | 1.00124.14 |
| C    |      |     |     |   |    |        |         |        |            |
| ATOM | 1729 | C   | LEU | X | 72 | 27.769 | -71.894 | 23.788 | 1.00116.96 |
| C    |      |     |     |   |    |        |         |        |            |
| ATOM | 1730 | O   | LEU | X | 72 | 28.610 | -71.307 | 23.148 | 1.00117.47 |
| O    |      |     |     |   |    |        |         |        |            |
| ATOM | 1731 | CB  | LEU | X | 72 | 28.681 | -73.126 | 25.832 | 1.00121.83 |
| C    |      |     |     |   |    |        |         |        |            |
| ATOM | 1732 | CG  | LEU | X | 72 | 28.516 | -74.407 | 26.715 | 1.00124.70 |
| C    |      |     |     |   |    |        |         |        |            |
| ATOM | 1733 | CD1 | LEU | X | 72 | 29.579 | -75.469 | 26.385 | 1.00128.51 |
| C    |      |     |     |   |    |        |         |        |            |
| ATOM | 1734 | CD2 | LEU | X | 72 | 28.475 | -74.138 | 28.238 | 1.00116.59 |
| C    |      |     |     |   |    |        |         |        |            |
| ATOM | 1735 | N   | HIP | X | 73 | 26.510 | -71.448 | 23.929 | 1.00114.38 |
| N    |      |     |     |   |    |        |         |        |            |
| ATOM | 1736 | CA  | HIP | X | 73 | 26.016 | -70.214 | 23.334 | 1.00119.36 |
| C    |      |     |     |   |    |        |         |        |            |
| ATOM | 1737 | C   | HIP | X | 73 | 26.037 | -69.140 | 24.413 | 1.00119.98 |
| C    |      |     |     |   |    |        |         |        |            |
| ATOM | 1738 | O   | HIP | X | 73 | 25.599 | -69.389 | 25.553 | 1.00121.28 |
| O    |      |     |     |   |    |        |         |        |            |
| ATOM | 1739 | CB  | HIP | X | 73 | 24.508 | -70.281 | 22.956 | 1.00120.95 |
| C    |      |     |     |   |    |        |         |        |            |
| ATOM | 1740 | CG  | HIP | X | 73 | 24.118 | -71.386 | 22.028 | 1.00119.01 |
| C    |      |     |     |   |    |        |         |        |            |
| ATOM | 1741 | ND1 | HIP | X | 73 | 24.733 | -71.583 | 20.808 | 1.00123.26 |
| N1+  |      |     |     |   |    |        |         |        |            |
| ATOM | 1742 | CD2 | HIP | X | 73 | 23.009 | -72.168 | 22.020 | 1.00112.94 |
| C    |      |     |     |   |    |        |         |        |            |
| ATOM | 1743 | CE1 | HIP | X | 73 | 24.099 | -72.543 | 20.151 | 1.00122.12 |
| C    |      |     |     |   |    |        |         |        |            |
| ATOM | 1744 | NE2 | HIP | X | 73 | 23.047 | -72.912 | 20.863 | 1.00118.56 |
| N    |      |     |     |   |    |        |         |        |            |
| ATOM | 1745 | N   | ASP | X | 74 | 26.519 | -67.966 | 24.055 | 1.00122.81 |
| N    |      |     |     |   |    |        |         |        |            |

|      |      |     |     |   |    |        |         |        |            |
|------|------|-----|-----|---|----|--------|---------|--------|------------|
| ATOM | 1746 | CA  | ASP | X | 74 | 26.784 | -66.937 | 25.066 | 1.00131.62 |
| C    |      |     |     |   |    |        |         |        |            |
| ATOM | 1747 | C   | ASP | X | 74 | 25.475 | -66.296 | 25.600 | 1.00120.33 |
| C    |      |     |     |   |    |        |         |        |            |
| ATOM | 1748 | O   | ASP | X | 74 | 24.414 | -66.340 | 24.939 | 1.00106.46 |
| O    |      |     |     |   |    |        |         |        |            |
| ATOM | 1749 | CB  | ASP | X | 74 | 27.783 | -65.876 | 24.549 | 1.00142.10 |
| C    |      |     |     |   |    |        |         |        |            |
| ATOM | 1750 | CG  | ASP | X | 74 | 29.249 | -66.167 | 24.972 | 1.00138.65 |
| C    |      |     |     |   |    |        |         |        |            |
| ATOM | 1751 | OD1 | ASP | X | 74 | 29.623 | -65.874 | 26.136 | 1.00130.70 |
| O    |      |     |     |   |    |        |         |        |            |
| ATOM | 1752 | OD2 | ASP | X | 74 | 30.023 | -66.648 | 24.119 | 1.00136.77 |
| O1-  |      |     |     |   |    |        |         |        |            |
| ATOM | 1753 | N   | ASP | X | 75 | 25.561 | -65.757 | 26.813 | 1.00119.49 |
| N    |      |     |     |   |    |        |         |        |            |
| ATOM | 1754 | CA  | ASP | X | 75 | 24.373 | -65.596 | 27.638 | 1.00124.93 |
| C    |      |     |     |   |    |        |         |        |            |
| ATOM | 1755 | C   | ASP | X | 75 | 23.421 | -64.492 | 27.115 | 1.00125.48 |
| C    |      |     |     |   |    |        |         |        |            |
| ATOM | 1756 | O   | ASP | X | 75 | 23.802 | -63.523 | 26.415 | 1.00137.62 |
| O    |      |     |     |   |    |        |         |        |            |
| ATOM | 1757 | CB  | ASP | X | 75 | 24.782 | -65.413 | 29.091 | 1.00143.69 |
| C    |      |     |     |   |    |        |         |        |            |
| ATOM | 1758 | CG  | ASP | X | 75 | 26.074 | -66.180 | 29.443 | 1.00156.34 |
| C    |      |     |     |   |    |        |         |        |            |
| ATOM | 1759 | OD1 | ASP | X | 75 | 26.943 | -66.338 | 28.548 | 1.00156.17 |
| O    |      |     |     |   |    |        |         |        |            |
| ATOM | 1760 | OD2 | ASP | X | 75 | 26.246 | -66.561 | 30.623 | 1.00168.40 |
| O1-  |      |     |     |   |    |        |         |        |            |
| ATOM | 1761 | N   | ASP | X | 76 | 22.157 | -64.700 | 27.426 | 1.00124.04 |
| N    |      |     |     |   |    |        |         |        |            |
| ATOM | 1762 | CA  | ASP | X | 76 | 21.015 | -63.818 | 27.062 | 1.00126.30 |
| C    |      |     |     |   |    |        |         |        |            |
| ATOM | 1763 | C   | ASP | X | 76 | 20.658 | -63.846 | 25.574 | 1.00120.80 |
| C    |      |     |     |   |    |        |         |        |            |
| ATOM | 1764 | O   | ASP | X | 76 | 19.674 | -63.235 | 25.164 | 1.00117.30 |
| O    |      |     |     |   |    |        |         |        |            |
| ATOM | 1765 | CB  | ASP | X | 76 | 21.183 | -62.376 | 27.614 | 1.00136.87 |
| C    |      |     |     |   |    |        |         |        |            |
| ATOM | 1766 | CG  | ASP | X | 76 | 20.928 | -62.268 | 29.177 | 1.00144.65 |
| C    |      |     |     |   |    |        |         |        |            |
| ATOM | 1767 | OD1 | ASP | X | 76 | 20.681 | -63.307 | 29.817 | 1.00142.06 |
| O    |      |     |     |   |    |        |         |        |            |
| ATOM | 1768 | OD2 | ASP | X | 76 | 21.059 | -61.152 | 29.771 | 1.00147.40 |
| O1-  |      |     |     |   |    |        |         |        |            |
| ATOM | 1769 | N   | SER | X | 77 | 21.404 | -64.641 | 24.793 | 1.00119.02 |
| N    |      |     |     |   |    |        |         |        |            |
| ATOM | 1770 | CA  | SER | X | 77 | 21.196 | -64.754 | 23.358 | 1.00115.72 |
| C    |      |     |     |   |    |        |         |        |            |
| ATOM | 1771 | C   | SER | X | 77 | 19.804 | -65.321 | 23.000 | 1.00123.00 |
| C    |      |     |     |   |    |        |         |        |            |
| ATOM | 1772 | O   | SER | X | 77 | 19.069 | -65.845 | 23.860 | 1.00113.43 |
| O    |      |     |     |   |    |        |         |        |            |

|      |      |     |     |   |    |        |         |        |            |
|------|------|-----|-----|---|----|--------|---------|--------|------------|
| ATOM | 1773 | CB  | SER | X | 77 | 22.302 | -65.626 | 22.726 | 1.00106.68 |
| C    |      |     |     |   |    |        |         |        |            |
| ATOM | 1774 | OG  | SER | X | 77 | 22.257 | -66.959 | 23.171 | 1.00 95.99 |
| O    |      |     |     |   |    |        |         |        |            |
| ATOM | 1775 | N   | CYS | X | 78 | 19.412 | -65.138 | 21.727 | 1.00128.92 |
| N    |      |     |     |   |    |        |         |        |            |
| ATOM | 1776 | CA  | CYS | X | 78 | 18.204 | -65.762 | 21.213 | 1.00120.61 |
| C    |      |     |     |   |    |        |         |        |            |
| ATOM | 1777 | C   | CYS | X | 78 | 18.542 | -66.799 | 20.181 | 1.00110.60 |
| C    |      |     |     |   |    |        |         |        |            |
| ATOM | 1778 | O   | CYS | X | 78 | 19.086 | -66.500 | 19.123 | 1.00112.34 |
| O    |      |     |     |   |    |        |         |        |            |
| ATOM | 1779 | CB  | CYS | X | 78 | 17.191 | -64.755 | 20.703 | 1.00125.61 |
| C    |      |     |     |   |    |        |         |        |            |
| ATOM | 1780 | SG  | CYS | X | 78 | 16.404 | -63.912 | 22.092 | 1.00158.01 |
| S    |      |     |     |   |    |        |         |        |            |
| ATOM | 1781 | N   | GLN | X | 79 | 18.206 | -68.039 | 20.514 | 1.00106.01 |
| N    |      |     |     |   |    |        |         |        |            |
| ATOM | 1782 | CA  | GLN | X | 79 | 18.520 | -69.189 | 19.688 | 1.00104.24 |
| C    |      |     |     |   |    |        |         |        |            |
| ATOM | 1783 | C   | GLN | X | 79 | 17.229 | -69.912 | 19.276 | 1.00106.86 |
| C    |      |     |     |   |    |        |         |        |            |
| ATOM | 1784 | O   | GLN | X | 79 | 16.213 | -69.876 | 19.974 | 1.00 99.13 |
| O    |      |     |     |   |    |        |         |        |            |
| ATOM | 1785 | CB  | GLN | X | 79 | 19.408 | -70.146 | 20.467 | 1.00103.37 |
| C    |      |     |     |   |    |        |         |        |            |
| ATOM | 1786 | CG  | GLN | X | 79 | 20.555 | -69.506 | 21.203 | 1.00100.86 |
| C    |      |     |     |   |    |        |         |        |            |
| ATOM | 1787 | CD  | GLN | X | 79 | 21.673 | -69.208 | 20.272 | 1.00101.84 |
| C    |      |     |     |   |    |        |         |        |            |
| ATOM | 1788 | OE1 | GLN | X | 79 | 22.765 | -69.761 | 20.394 | 1.00104.14 |
| O    |      |     |     |   |    |        |         |        |            |
| ATOM | 1789 | NE2 | GLN | X | 79 | 21.364 | -68.485 | 19.231 | 1.00101.69 |
| N    |      |     |     |   |    |        |         |        |            |
| ATOM | 1790 | N   | VAL | X | 80 | 17.321 | -70.627 | 18.174 | 1.00106.66 |
| N    |      |     |     |   |    |        |         |        |            |
| ATOM | 1791 | CA  | VAL | X | 80 | 16.306 | -71.597 | 17.827 | 1.00106.87 |
| C    |      |     |     |   |    |        |         |        |            |
| ATOM | 1792 | C   | VAL | X | 80 | 16.866 | -73.009 | 18.007 | 1.00 95.98 |
| C    |      |     |     |   |    |        |         |        |            |
| ATOM | 1793 | O   | VAL | X | 80 | 17.925 | -73.358 | 17.478 | 1.00 98.67 |
| O    |      |     |     |   |    |        |         |        |            |
| ATOM | 1794 | CB  | VAL | X | 80 | 15.659 | -71.260 | 16.480 | 1.00119.18 |
| C    |      |     |     |   |    |        |         |        |            |
| ATOM | 1795 | CG1 | VAL | X | 80 | 15.653 | -72.444 | 15.512 | 1.00122.82 |
| C    |      |     |     |   |    |        |         |        |            |
| ATOM | 1796 | CG2 | VAL | X | 80 | 14.251 | -70.696 | 16.729 | 1.00127.32 |
| C    |      |     |     |   |    |        |         |        |            |
| ATOM | 1797 | N   | ILE | X | 81 | 16.219 | -73.773 | 18.862 | 1.00 87.88 |
| N    |      |     |     |   |    |        |         |        |            |
| ATOM | 1798 | CA  | ILE | X | 81 | 16.589 | -75.183 | 19.069 | 1.00 91.45 |
| C    |      |     |     |   |    |        |         |        |            |
| ATOM | 1799 | C   | ILE | X | 81 | 15.414 | -76.139 | 18.783 | 1.00 93.27 |
| C    |      |     |     |   |    |        |         |        |            |

|      |      |     |     |   |    |        |         |        |      |        |
|------|------|-----|-----|---|----|--------|---------|--------|------|--------|
| ATOM | 1800 | O   | ILE | X | 81 | 14.298 | -75.872 | 19.167 | 1.00 | 85.87  |
| O    |      |     |     |   |    |        |         |        |      |        |
| ATOM | 1801 | CB  | ILE | X | 81 | 17.062 | -75.348 | 20.490 | 1.00 | 96.57  |
| C    |      |     |     |   |    |        |         |        |      |        |
| ATOM | 1802 | CG1 | ILE | X | 81 | 17.967 | -74.187 | 20.864 | 1.00 | 102.75 |
| C    |      |     |     |   |    |        |         |        |      |        |
| ATOM | 1803 | CG2 | ILE | X | 81 | 17.841 | -76.634 | 20.666 | 1.00 | 99.32  |
| C    |      |     |     |   |    |        |         |        |      |        |
| ATOM | 1804 | CD1 | ILE | X | 81 | 18.411 | -74.217 | 22.318 | 1.00 | 108.24 |
| C    |      |     |     |   |    |        |         |        |      |        |
| ATOM | 1805 | N   | PRO | X | 82 | 15.665 | -77.234 | 18.035 | 1.00 | 92.30  |
| N    |      |     |     |   |    |        |         |        |      |        |
| ATOM | 1806 | CA  | PRO | X | 82 | 14.685 | -78.322 | 17.949 | 1.00 | 87.38  |
| C    |      |     |     |   |    |        |         |        |      |        |
| ATOM | 1807 | C   | PRO | X | 82 | 14.322 | -78.932 | 19.284 | 1.00 | 84.39  |
| C    |      |     |     |   |    |        |         |        |      |        |
| ATOM | 1808 | O   | PRO | X | 82 | 15.181 | -79.065 | 20.114 | 1.00 | 84.08  |
| O    |      |     |     |   |    |        |         |        |      |        |
| ATOM | 1809 | CB  | PRO | X | 82 | 15.429 | -79.362 | 17.172 | 1.00 | 91.38  |
| C    |      |     |     |   |    |        |         |        |      |        |
| ATOM | 1810 | CG  | PRO | X | 82 | 16.853 | -79.150 | 17.569 | 1.00 | 91.46  |
| C    |      |     |     |   |    |        |         |        |      |        |
| ATOM | 1811 | CD  | PRO | X | 82 | 16.996 | -77.665 | 17.568 | 1.00 | 92.15  |
| C    |      |     |     |   |    |        |         |        |      |        |
| ATOM | 1812 | N   | VAL | X | 83 | 13.071 | -79.301 | 19.482 | 1.00 | 84.76  |
| N    |      |     |     |   |    |        |         |        |      |        |
| ATOM | 1813 | CA  | VAL | X | 83 | 12.655 | -80.067 | 20.668 | 1.00 | 86.18  |
| C    |      |     |     |   |    |        |         |        |      |        |
| ATOM | 1814 | C   | VAL | X | 83 | 12.079 | -81.352 | 20.248 | 1.00 | 79.62  |
| C    |      |     |     |   |    |        |         |        |      |        |
| ATOM | 1815 | O   | VAL | X | 83 | 11.044 | -81.298 | 19.584 | 1.00 | 78.16  |
| O    |      |     |     |   |    |        |         |        |      |        |
| ATOM | 1816 | CB  | VAL | X | 83 | 11.500 | -79.347 | 21.405 | 1.00 | 99.07  |
| C    |      |     |     |   |    |        |         |        |      |        |
| ATOM | 1817 | CG1 | VAL | X | 83 | 11.099 | -80.130 | 22.654 | 1.00 | 113.55 |
| C    |      |     |     |   |    |        |         |        |      |        |
| ATOM | 1818 | CG2 | VAL | X | 83 | 11.862 | -77.910 | 21.774 | 1.00 | 103.30 |
| C    |      |     |     |   |    |        |         |        |      |        |
| ATOM | 1819 | N   | LEU | X | 84 | 12.651 | -82.492 | 20.692 | 1.00 | 74.19  |
| N    |      |     |     |   |    |        |         |        |      |        |
| ATOM | 1820 | CA  | LEU | X | 84 | 12.031 | -83.817 | 20.332 | 1.00 | 70.75  |
| C    |      |     |     |   |    |        |         |        |      |        |
| ATOM | 1821 | C   | LEU | X | 84 | 10.782 | -84.123 | 21.081 | 1.00 | 73.78  |
| C    |      |     |     |   |    |        |         |        |      |        |
| ATOM | 1822 | O   | LEU | X | 84 | 10.772 | -84.050 | 22.281 | 1.00 | 74.58  |
| O    |      |     |     |   |    |        |         |        |      |        |
| ATOM | 1823 | CB  | LEU | X | 84 | 12.896 | -85.056 | 20.594 | 1.00 | 68.32  |
| C    |      |     |     |   |    |        |         |        |      |        |
| ATOM | 1824 | CG  | LEU | X | 84 | 14.409 | -85.004 | 20.737 | 1.00 | 69.73  |
| C    |      |     |     |   |    |        |         |        |      |        |
| ATOM | 1825 | CD1 | LEU | X | 84 | 14.983 | -86.337 | 21.226 | 1.00 | 69.15  |
| C    |      |     |     |   |    |        |         |        |      |        |
| ATOM | 1826 | CD2 | LEU | X | 84 | 15.073 | -84.628 | 19.428 | 1.00 | 71.37  |
| C    |      |     |     |   |    |        |         |        |      |        |

|      |      |     |     |   |    |        |         |        |      |        |
|------|------|-----|-----|---|----|--------|---------|--------|------|--------|
| ATOM | 1827 | N   | PRO | X | 85 | 9.817  | -84.631 | 20.392 | 1.00 | 82.46  |
| N    |      |     |     |   |    |        |         |        |      |        |
| ATOM | 1828 | CA  | PRO | X | 85 | 8.525  | -84.923 | 20.918 | 1.00 | 88.96  |
| C    |      |     |     |   |    |        |         |        |      |        |
| ATOM | 1829 | C   | PRO | X | 85 | 8.523  | -86.217 | 21.808 | 1.00 | 88.40  |
| C    |      |     |     |   |    |        |         |        |      |        |
| ATOM | 1830 | O   | PRO | X | 85 | 9.377  | -87.174 | 21.677 | 1.00 | 83.93  |
| O    |      |     |     |   |    |        |         |        |      |        |
| ATOM | 1831 | CB  | PRO | X | 85 | 7.705  | -85.126 | 19.653 | 1.00 | 100.25 |
| C    |      |     |     |   |    |        |         |        |      |        |
| ATOM | 1832 | CG  | PRO | X | 85 | 8.716  | -85.628 | 18.609 | 1.00 | 103.17 |
| C    |      |     |     |   |    |        |         |        |      |        |
| ATOM | 1833 | CD  | PRO | X | 85 | 10.106 | -85.436 | 19.208 | 1.00 | 93.72  |
| C    |      |     |     |   |    |        |         |        |      |        |
| ATOM | 1834 | N   | GLN | X | 86 | 7.646  | -86.218 | 22.768 | 1.00 | 90.15  |
| N    |      |     |     |   |    |        |         |        |      |        |
| ATOM | 1835 | CA  | GLN | X | 86 | 7.549  | -87.395 | 23.664 | 1.00 | 102.63 |
| C    |      |     |     |   |    |        |         |        |      |        |
| ATOM | 1836 | C   | GLN | X | 86 | 8.593  | -87.396 | 24.734 | 1.00 | 110.76 |
| C    |      |     |     |   |    |        |         |        |      |        |
| ATOM | 1837 | O   | GLN | X | 86 | 8.550  | -88.299 | 25.581 | 1.00 | 108.57 |
| O    |      |     |     |   |    |        |         |        |      |        |
| ATOM | 1838 | CB  | GLN | X | 86 | 7.834  | -88.733 | 22.950 | 1.00 | 102.33 |
| C    |      |     |     |   |    |        |         |        |      |        |
| ATOM | 1839 | CG  | GLN | X | 86 | 7.183  | -89.040 | 21.626 | 1.00 | 105.44 |
| C    |      |     |     |   |    |        |         |        |      |        |
| ATOM | 1840 | CD  | GLN | X | 86 | 7.146  | -90.547 | 21.353 | 1.00 | 111.32 |
| C    |      |     |     |   |    |        |         |        |      |        |
| ATOM | 1841 | NE2 | GLN | X | 86 | 7.628  | -91.026 | 20.318 | 1.00 | 103.87 |
| N    |      |     |     |   |    |        |         |        |      |        |
| ATOM | 1842 | OE1 | GLN | X | 86 | 6.597  | -91.308 | 22.309 | 1.00 | 122.17 |
| O    |      |     |     |   |    |        |         |        |      |        |
| ATOM | 1843 | N   | VAL | X | 87 | 9.622  | -86.560 | 24.663 | 1.00 | 114.59 |
| N    |      |     |     |   |    |        |         |        |      |        |
| ATOM | 1844 | CA  | VAL | X | 87 | 10.576 | -86.601 | 25.740 | 1.00 | 107.06 |
| C    |      |     |     |   |    |        |         |        |      |        |
| ATOM | 1845 | C   | VAL | X | 87 | 10.046 | -85.657 | 26.752 | 1.00 | 102.03 |
| C    |      |     |     |   |    |        |         |        |      |        |
| ATOM | 1846 | O   | VAL | X | 87 | 9.826  | -84.510 | 26.438 | 1.00 | 94.48  |
| O    |      |     |     |   |    |        |         |        |      |        |
| ATOM | 1847 | CB  | VAL | X | 87 | 12.007 | -86.196 | 25.319 | 1.00 | 105.87 |
| C    |      |     |     |   |    |        |         |        |      |        |
| ATOM | 1848 | CG1 | VAL | X | 87 | 13.005 | -86.706 | 26.337 | 1.00 | 100.90 |
| C    |      |     |     |   |    |        |         |        |      |        |
| ATOM | 1849 | CG2 | VAL | X | 87 | 12.339 | -86.768 | 23.957 | 1.00 | 115.61 |
| C    |      |     |     |   |    |        |         |        |      |        |
| ATOM | 1850 | N   | MET | X | 88 | 9.739  | -86.142 | 27.931 | 1.00 | 102.78 |
| N    |      |     |     |   |    |        |         |        |      |        |
| ATOM | 1851 | CA  | MET | X | 88 | 9.218  | -85.281 | 28.963 | 1.00 | 106.51 |
| C    |      |     |     |   |    |        |         |        |      |        |
| ATOM | 1852 | C   | MET | X | 88 | 9.984  | -85.559 | 30.193 | 1.00 | 98.49  |
| C    |      |     |     |   |    |        |         |        |      |        |
| ATOM | 1853 | O   | MET | X | 88 | 9.913  | -86.626 | 30.724 | 1.00 | 89.18  |
| O    |      |     |     |   |    |        |         |        |      |        |



|      |      |     |     |   |    |        |         |        |            |
|------|------|-----|-----|---|----|--------|---------|--------|------------|
| ATOM | 1854 | CB  | MET | X | 88 | 7.708  | -85.516 | 29.235 | 1.00119.09 |
| C    |      |     |     |   |    |        |         |        |            |
| ATOM | 1855 | CG  | MET | X | 88 | 6.835  | -84.283 | 29.005 | 1.00134.99 |
| C    |      |     |     |   |    |        |         |        |            |
| ATOM | 1856 | SD  | MET | X | 88 | 5.590  | -84.332 | 27.667 | 1.00185.91 |
| S    |      |     |     |   |    |        |         |        |            |
| ATOM | 1857 | CE  | MET | X | 88 | 6.404  | -85.144 | 26.282 | 1.00163.40 |
| C    |      |     |     |   |    |        |         |        |            |
| ATOM | 1858 | N   | MET | X | 89 | 10.782 | -84.594 | 30.610 | 1.00 97.21 |
| N    |      |     |     |   |    |        |         |        |            |
| ATOM | 1859 | CA  | MET | X | 89 | 11.696 | -84.768 | 31.694 | 1.00101.50 |
| C    |      |     |     |   |    |        |         |        |            |
| ATOM | 1860 | C   | MET | X | 89 | 12.267 | -83.381 | 31.889 | 1.00110.34 |
| C    |      |     |     |   |    |        |         |        |            |
| ATOM | 1861 | O   | MET | X | 89 | 12.317 | -82.583 | 30.929 | 1.00143.95 |
| O    |      |     |     |   |    |        |         |        |            |
| ATOM | 1862 | CB  | MET | X | 89 | 12.811 | -85.787 | 31.357 | 1.00 98.19 |
| C    |      |     |     |   |    |        |         |        |            |
| ATOM | 1863 | CG  | MET | X | 89 | 14.250 | -85.258 | 31.484 | 1.00 95.77 |
| C    |      |     |     |   |    |        |         |        |            |
| ATOM | 1864 | SD  | MET | X | 89 | 15.477 | -86.563 | 31.761 | 1.00 95.58 |
| S    |      |     |     |   |    |        |         |        |            |
| ATOM | 1865 | CE  | MET | X | 89 | 16.200 | -85.994 | 33.286 | 1.00104.56 |
| C    |      |     |     |   |    |        |         |        |            |
| ATOM | 1866 | N   | ILE | X | 90 | 12.568 | -83.013 | 33.122 | 1.00108.22 |
| N    |      |     |     |   |    |        |         |        |            |
| ATOM | 1867 | CA  | ILE | X | 90 | 13.073 | -81.689 | 33.338 | 1.00 96.25 |
| C    |      |     |     |   |    |        |         |        |            |
| ATOM | 1868 | C   | ILE | X | 90 | 14.542 | -81.865 | 33.530 | 1.00 91.03 |
| C    |      |     |     |   |    |        |         |        |            |
| ATOM | 1869 | O   | ILE | X | 90 | 14.956 | -82.580 | 34.443 | 1.00 91.91 |
| O    |      |     |     |   |    |        |         |        |            |
| ATOM | 1870 | CB  | ILE | X | 90 | 12.342 | -80.992 | 34.471 | 1.00 94.49 |
| C    |      |     |     |   |    |        |         |        |            |
| ATOM | 1871 | CG1 | ILE | X | 90 | 10.814 | -80.948 | 34.165 | 1.00 97.23 |
| C    |      |     |     |   |    |        |         |        |            |
| ATOM | 1872 | CG2 | ILE | X | 90 | 12.850 | -79.591 | 34.571 | 1.00 92.70 |
| C    |      |     |     |   |    |        |         |        |            |
| ATOM | 1873 | CD1 | ILE | X | 90 | 9.997  | -82.179 | 34.616 | 1.00 97.91 |
| C    |      |     |     |   |    |        |         |        |            |
| ATOM | 1874 | N   | LEU | X | 91 | 15.329 | -81.361 | 32.595 | 1.00 89.04 |
| N    |      |     |     |   |    |        |         |        |            |
| ATOM | 1875 | CA  | LEU | X | 91 | 16.700 | -81.838 | 32.440 | 1.00 89.80 |
| C    |      |     |     |   |    |        |         |        |            |
| ATOM | 1876 | C   | LEU | X | 91 | 17.671 | -80.819 | 33.045 | 1.00 86.66 |
| C    |      |     |     |   |    |        |         |        |            |
| ATOM | 1877 | O   | LEU | X | 91 | 17.441 | -79.597 | 32.930 | 1.00 90.31 |
| O    |      |     |     |   |    |        |         |        |            |
| ATOM | 1878 | CB  | LEU | X | 91 | 16.982 | -82.033 | 30.964 | 1.00 91.12 |
| C    |      |     |     |   |    |        |         |        |            |
| ATOM | 1879 | CG  | LEU | X | 91 | 18.139 | -82.923 | 30.522 | 1.00 95.52 |
| C    |      |     |     |   |    |        |         |        |            |
| ATOM | 1880 | CD1 | LEU | X | 91 | 19.107 | -82.088 | 29.680 | 1.00 94.56 |
| C    |      |     |     |   |    |        |         |        |            |

|      |      |     |     |   |    |        |         |        |      |        |
|------|------|-----|-----|---|----|--------|---------|--------|------|--------|
| ATOM | 1881 | CD2 | LEU | X | 91 | 18.856 | -83.646 | 31.676 | 1.00 | 97.67  |
| C    |      |     |     |   |    |        |         |        |      |        |
| ATOM | 1882 | N   | ILE | X | 92 | 18.695 | -81.294 | 33.741 | 1.00 | 82.63  |
| N    |      |     |     |   |    |        |         |        |      |        |
| ATOM | 1883 | CA  | ILE | X | 92 | 19.543 | -80.405 | 34.512 | 1.00 | 81.68  |
| C    |      |     |     |   |    |        |         |        |      |        |
| ATOM | 1884 | C   | ILE | X | 92 | 20.929 | -80.370 | 33.912 | 1.00 | 78.29  |
| C    |      |     |     |   |    |        |         |        |      |        |
| ATOM | 1885 | O   | ILE | X | 92 | 21.470 | -81.407 | 33.540 | 1.00 | 79.28  |
| O    |      |     |     |   |    |        |         |        |      |        |
| ATOM | 1886 | CB  | ILE | X | 92 | 19.718 | -80.876 | 35.933 | 1.00 | 86.37  |
| C    |      |     |     |   |    |        |         |        |      |        |
| ATOM | 1887 | CG1 | ILE | X | 92 | 18.364 | -81.088 | 36.615 | 1.00 | 85.52  |
| C    |      |     |     |   |    |        |         |        |      |        |
| ATOM | 1888 | CG2 | ILE | X | 92 | 20.565 | -79.864 | 36.697 | 1.00 | 91.25  |
| C    |      |     |     |   |    |        |         |        |      |        |
| ATOM | 1889 | CD1 | ILE | X | 92 | 18.389 | -82.238 | 37.615 | 1.00 | 85.49  |
| C    |      |     |     |   |    |        |         |        |      |        |
| ATOM | 1890 | N   | PRO | X | 93 | 21.499 | -79.167 | 33.795 | 1.00 | 75.48  |
| N    |      |     |     |   |    |        |         |        |      |        |
| ATOM | 1891 | CA  | PRO | X | 93 | 22.886 | -79.016 | 33.414 | 1.00 | 77.55  |
| C    |      |     |     |   |    |        |         |        |      |        |
| ATOM | 1892 | C   | PRO | X | 93 | 23.796 | -80.036 | 34.068 | 1.00 | 80.89  |
| C    |      |     |     |   |    |        |         |        |      |        |
| ATOM | 1893 | O   | PRO | X | 93 | 23.754 | -80.221 | 35.301 | 1.00 | 80.54  |
| O    |      |     |     |   |    |        |         |        |      |        |
| ATOM | 1894 | CB  | PRO | X | 93 | 23.199 | -77.617 | 33.842 | 1.00 | 78.72  |
| C    |      |     |     |   |    |        |         |        |      |        |
| ATOM | 1895 | CG  | PRO | X | 93 | 21.922 | -76.889 | 33.536 | 1.00 | 77.23  |
| C    |      |     |     |   |    |        |         |        |      |        |
| ATOM | 1896 | CD  | PRO | X | 93 | 20.807 | -77.881 | 33.795 | 1.00 | 75.37  |
| C    |      |     |     |   |    |        |         |        |      |        |
| ATOM | 1897 | N   | GLY | X | 94 | 24.573 | -80.742 | 33.245 | 1.00 | 85.40  |
| N    |      |     |     |   |    |        |         |        |      |        |
| ATOM | 1898 | CA  | GLY | X | 94 | 25.521 | -81.737 | 33.741 | 1.00 | 87.26  |
| C    |      |     |     |   |    |        |         |        |      |        |
| ATOM | 1899 | C   | GLY | X | 94 | 24.950 | -83.125 | 33.849 | 1.00 | 87.87  |
| C    |      |     |     |   |    |        |         |        |      |        |
| ATOM | 1900 | O   | GLY | X | 94 | 25.707 | -84.096 | 33.908 | 1.00 | 87.09  |
| O    |      |     |     |   |    |        |         |        |      |        |
| ATOM | 1901 | N   | GLN | X | 95 | 23.613 | -83.230 | 33.901 | 1.00 | 93.25  |
| N    |      |     |     |   |    |        |         |        |      |        |
| ATOM | 1902 | CA  | GLN | X | 95 | 22.942 | -84.516 | 34.010 | 1.00 | 102.46 |
| C    |      |     |     |   |    |        |         |        |      |        |
| ATOM | 1903 | C   | GLN | X | 95 | 23.099 | -85.254 | 32.711 | 1.00 | 102.45 |
| C    |      |     |     |   |    |        |         |        |      |        |
| ATOM | 1904 | O   | GLN | X | 95 | 23.094 | -84.650 | 31.666 | 1.00 | 103.73 |
| O    |      |     |     |   |    |        |         |        |      |        |
| ATOM | 1905 | CB  | GLN | X | 95 | 21.452 | -84.346 | 34.262 | 1.00 | 97.64  |
| C    |      |     |     |   |    |        |         |        |      |        |
| ATOM | 1906 | CG  | GLN | X | 95 | 20.758 | -85.676 | 34.269 | 1.00 | 94.22  |
| C    |      |     |     |   |    |        |         |        |      |        |
| ATOM | 1907 | CD  | GLN | X | 95 | 19.459 | -85.629 | 34.985 | 1.00 | 92.20  |
| C    |      |     |     |   |    |        |         |        |      |        |

|      |      |     |     |   |    |        |         |        |      |       |
|------|------|-----|-----|---|----|--------|---------|--------|------|-------|
| ATOM | 1908 | NE2 | GLN | X | 95 | 19.129 | -86.553 | 35.774 | 1.00 | 90.43 |
| N    |      |     |     |   |    |        |         |        |      |       |
| ATOM | 1909 | OE1 | GLN | X | 95 | 18.677 | -84.574 | 34.714 | 1.00 | 86.07 |
| O    |      |     |     |   |    |        |         |        |      |       |
| ATOM | 1910 | N   | THR | X | 96 | 23.189 | -86.570 | 32.764 | 1.00 | 95.87 |
| N    |      |     |     |   |    |        |         |        |      |       |
| ATOM | 1911 | CA  | THR | X | 96 | 23.246 | -87.304 | 31.552 | 1.00 | 89.50 |
| C    |      |     |     |   |    |        |         |        |      |       |
| ATOM | 1912 | C   | THR | X | 96 | 21.858 | -87.830 | 31.162 | 1.00 | 86.78 |
| C    |      |     |     |   |    |        |         |        |      |       |
| ATOM | 1913 | O   | THR | X | 96 | 21.058 | -88.175 | 32.007 | 1.00 | 81.66 |
| O    |      |     |     |   |    |        |         |        |      |       |
| ATOM | 1914 | CB  | THR | X | 96 | 24.298 | -88.384 | 31.588 | 1.00 | 93.07 |
| C    |      |     |     |   |    |        |         |        |      |       |
| ATOM | 1915 | OG1 | THR | X | 96 | 24.905 | -88.471 | 30.297 | 1.00 | 95.10 |
| O    |      |     |     |   |    |        |         |        |      |       |
| ATOM | 1916 | CG2 | THR | X | 96 | 23.667 | -89.741 | 31.974 | 1.00 | 96.38 |
| C    |      |     |     |   |    |        |         |        |      |       |
| ATOM | 1917 | N   | LEU | X | 97 | 21.571 | -87.836 | 29.860 | 1.00 | 88.86 |
| N    |      |     |     |   |    |        |         |        |      |       |
| ATOM | 1918 | CA  | LEU | X | 97 | 20.271 | -88.263 | 29.337 | 1.00 | 89.91 |
| C    |      |     |     |   |    |        |         |        |      |       |
| ATOM | 1919 | C   | LEU | X | 97 | 20.471 | -89.288 | 28.205 | 1.00 | 85.98 |
| C    |      |     |     |   |    |        |         |        |      |       |
| ATOM | 1920 | O   | LEU | X | 97 | 20.958 | -88.932 | 27.145 | 1.00 | 80.18 |
| O    |      |     |     |   |    |        |         |        |      |       |
| ATOM | 1921 | CB  | LEU | X | 97 | 19.459 | -87.078 | 28.772 | 1.00 | 90.55 |
| C    |      |     |     |   |    |        |         |        |      |       |
| ATOM | 1922 | CG  | LEU | X | 97 | 18.241 | -87.431 | 27.874 | 1.00 | 87.07 |
| C    |      |     |     |   |    |        |         |        |      |       |
| ATOM | 1923 | CD1 | LEU | X | 97 | 17.144 | -88.181 | 28.644 | 1.00 | 86.26 |
| C    |      |     |     |   |    |        |         |        |      |       |
| ATOM | 1924 | CD2 | LEU | X | 97 | 17.666 | -86.188 | 27.210 | 1.00 | 82.33 |
| C    |      |     |     |   |    |        |         |        |      |       |
| ATOM | 1925 | N   | PRO | X | 98 | 20.016 | -90.541 | 28.414 | 1.00 | 83.41 |
| N    |      |     |     |   |    |        |         |        |      |       |
| ATOM | 1926 | CA  | PRO | X | 98 | 20.073 | -91.495 | 27.359 | 1.00 | 81.39 |
| C    |      |     |     |   |    |        |         |        |      |       |
| ATOM | 1927 | C   | PRO | X | 98 | 18.701 | -91.553 | 26.621 | 1.00 | 78.79 |
| C    |      |     |     |   |    |        |         |        |      |       |
| ATOM | 1928 | O   | PRO | X | 98 | 17.624 | -91.301 | 27.234 | 1.00 | 75.86 |
| O    |      |     |     |   |    |        |         |        |      |       |
| ATOM | 1929 | CB  | PRO | X | 98 | 20.404 | -92.768 | 28.105 | 1.00 | 82.29 |
| C    |      |     |     |   |    |        |         |        |      |       |
| ATOM | 1930 | CG  | PRO | X | 98 | 19.534 | -92.676 | 29.283 | 1.00 | 82.99 |
| C    |      |     |     |   |    |        |         |        |      |       |
| ATOM | 1931 | CD  | PRO | X | 98 | 19.489 | -91.183 | 29.621 | 1.00 | 85.42 |
| C    |      |     |     |   |    |        |         |        |      |       |
| ATOM | 1932 | N   | LEU | X | 99 | 18.753 | -91.815 | 25.310 | 1.00 | 74.98 |
| N    |      |     |     |   |    |        |         |        |      |       |
| ATOM | 1933 | CA  | LEU | X | 99 | 17.571 | -91.814 | 24.503 | 1.00 | 73.13 |
| C    |      |     |     |   |    |        |         |        |      |       |
| ATOM | 1934 | C   | LEU | X | 99 | 17.517 | -92.978 | 23.510 | 1.00 | 74.64 |
| C    |      |     |     |   |    |        |         |        |      |       |

|      |      |     |     |   |     |        |         |        |      |       |
|------|------|-----|-----|---|-----|--------|---------|--------|------|-------|
| ATOM | 1935 | O   | LEU | X | 99  | 18.558 | -93.551 | 23.153 | 1.00 | 77.05 |
| O    |      |     |     |   |     |        |         |        |      |       |
| ATOM | 1936 | CB  | LEU | X | 99  | 17.529 | -90.498 | 23.819 | 1.00 | 70.67 |
| C    |      |     |     |   |     |        |         |        |      |       |
| ATOM | 1937 | CG  | LEU | X | 99  | 16.670 | -89.595 | 24.660 | 1.00 | 70.96 |
| C    |      |     |     |   |     |        |         |        |      |       |
| ATOM | 1938 | CD1 | LEU | X | 99  | 16.884 | -88.125 | 24.299 | 1.00 | 69.18 |
| C    |      |     |     |   |     |        |         |        |      |       |
| ATOM | 1939 | CD2 | LEU | X | 99  | 15.198 | -90.068 | 24.488 | 1.00 | 73.19 |
| C    |      |     |     |   |     |        |         |        |      |       |
| ATOM | 1940 | N   | GLN | X | 100 | 16.306 | -93.384 | 23.130 | 1.00 | 74.09 |
| N    |      |     |     |   |     |        |         |        |      |       |
| ATOM | 1941 | CA  | GLN | X | 100 | 16.130 | -94.320 | 22.042 | 1.00 | 76.11 |
| C    |      |     |     |   |     |        |         |        |      |       |
| ATOM | 1942 | C   | GLN | X | 100 | 14.976 | -93.912 | 21.193 | 1.00 | 75.68 |
| C    |      |     |     |   |     |        |         |        |      |       |
| ATOM | 1943 | O   | GLN | X | 100 | 13.838 | -93.713 | 21.662 | 1.00 | 77.03 |
| O    |      |     |     |   |     |        |         |        |      |       |
| ATOM | 1944 | CB  | GLN | X | 100 | 16.052 | -95.771 | 22.463 | 1.00 | 79.68 |
| C    |      |     |     |   |     |        |         |        |      |       |
| ATOM | 1945 | CG  | GLN | X | 100 | 17.417 | -96.412 | 22.672 | 1.00 | 81.48 |
| C    |      |     |     |   |     |        |         |        |      |       |
| ATOM | 1946 | CD  | GLN | X | 100 | 17.304 | -97.922 | 22.865 | 1.00 | 85.14 |
| C    |      |     |     |   |     |        |         |        |      |       |
| ATOM | 1947 | OE1 | GLN | X | 100 | 17.662 | -98.728 | 22.023 | 1.00 | 92.27 |
| O    |      |     |     |   |     |        |         |        |      |       |
| ATOM | 1948 | NE2 | GLN | X | 100 | 16.900 | -98.404 | 24.021 | 1.00 | 83.44 |
| N    |      |     |     |   |     |        |         |        |      |       |
| ATOM | 1949 | N   | LEU | X | 101 | 15.306 | -93.669 | 19.927 | 1.00 | 74.26 |
| N    |      |     |     |   |     |        |         |        |      |       |
| ATOM | 1950 | CA  | LEU | X | 101 | 14.352 | -93.035 | 19.007 | 1.00 | 71.79 |
| C    |      |     |     |   |     |        |         |        |      |       |
| ATOM | 1951 | C   | LEU | X | 101 | 13.894 | -93.999 | 17.921 | 1.00 | 72.03 |
| C    |      |     |     |   |     |        |         |        |      |       |
| ATOM | 1952 | O   | LEU | X | 101 | 14.678 | -94.783 | 17.369 | 1.00 | 69.86 |
| O    |      |     |     |   |     |        |         |        |      |       |
| ATOM | 1953 | CB  | LEU | X | 101 | 14.951 | -91.753 | 18.466 | 1.00 | 69.72 |
| C    |      |     |     |   |     |        |         |        |      |       |
| ATOM | 1954 | CG  | LEU | X | 101 | 15.351 | -90.859 | 19.644 | 1.00 | 68.60 |
| C    |      |     |     |   |     |        |         |        |      |       |
| ATOM | 1955 | CD1 | LEU | X | 101 | 16.191 | -89.683 | 19.225 | 1.00 | 67.75 |
| C    |      |     |     |   |     |        |         |        |      |       |
| ATOM | 1956 | CD2 | LEU | X | 101 | 14.094 | -90.361 | 20.343 | 1.00 | 69.50 |
| C    |      |     |     |   |     |        |         |        |      |       |
| ATOM | 1957 | N   | PHE | X | 102 | 12.582 | -94.017 | 17.689 | 1.00 | 74.51 |
| N    |      |     |     |   |     |        |         |        |      |       |
| ATOM | 1958 | CA  | PHE | X | 102 | 11.972 | -95.058 | 16.850 | 1.00 | 79.11 |
| C    |      |     |     |   |     |        |         |        |      |       |
| ATOM | 1959 | C   | PHE | X | 102 | 11.265 | -94.455 | 15.617 | 1.00 | 80.36 |
| C    |      |     |     |   |     |        |         |        |      |       |
| ATOM | 1960 | O   | PHE | X | 102 | 11.401 | -94.973 | 14.481 | 1.00 | 79.51 |
| O    |      |     |     |   |     |        |         |        |      |       |
| ATOM | 1961 | CB  | PHE | X | 102 | 10.944 | -95.792 | 17.664 | 1.00 | 82.94 |
| C    |      |     |     |   |     |        |         |        |      |       |

|      |      |     |     |   |     |        |         |        |      |        |
|------|------|-----|-----|---|-----|--------|---------|--------|------|--------|
| ATOM | 1962 | CG  | PHE | X | 102 | 11.531 | -96.714 | 18.687 | 1.00 | 88.10  |
| C    |      |     |     |   |     |        |         |        |      |        |
| ATOM | 1963 | CD1 | PHE | X | 102 | 12.539 | -96.237 | 19.541 | 1.00 | 87.92  |
| C    |      |     |     |   |     |        |         |        |      |        |
| ATOM | 1964 | CD2 | PHE | X | 102 | 11.035 | -98.027 | 18.806 | 1.00 | 97.83  |
| C    |      |     |     |   |     |        |         |        |      |        |
| ATOM | 1965 | CE1 | PHE | X | 102 | 12.932 | -97.047 | 20.615 | 1.00 | 92.78  |
| C    |      |     |     |   |     |        |         |        |      |        |
| ATOM | 1966 | CE2 | PHE | X | 102 | 11.532 | -98.872 | 19.809 | 1.00 | 102.25 |
| C    |      |     |     |   |     |        |         |        |      |        |
| ATOM | 1967 | CZ  | PHE | X | 102 | 12.468 | -98.366 | 20.722 | 1.00 | 102.42 |
| C    |      |     |     |   |     |        |         |        |      |        |
| ATOM | 1968 | N   | HIE | X | 103 | 10.604 | -93.326 | 15.836 | 1.00 | 81.49  |
| N    |      |     |     |   |     |        |         |        |      |        |
| ATOM | 1969 | CA  | HIE | X | 103 | 9.880  | -92.691 | 14.752 | 1.00 | 85.53  |
| C    |      |     |     |   |     |        |         |        |      |        |
| ATOM | 1970 | C   | HIE | X | 103 | 10.821 | -91.964 | 13.844 | 1.00 | 85.08  |
| C    |      |     |     |   |     |        |         |        |      |        |
| ATOM | 1971 | O   | HIE | X | 103 | 11.775 | -91.315 | 14.297 | 1.00 | 85.24  |
| O    |      |     |     |   |     |        |         |        |      |        |
| ATOM | 1972 | CB  | HIE | X | 103 | 8.790  | -91.809 | 15.285 | 1.00 | 87.73  |
| C    |      |     |     |   |     |        |         |        |      |        |
| ATOM | 1973 | CG  | HIE | X | 103 | 7.879  | -92.548 | 16.185 | 1.00 | 88.78  |
| C    |      |     |     |   |     |        |         |        |      |        |
| ATOM | 1974 | CD2 | HIE | X | 103 | 8.156  | -92.670 | 17.526 | 1.00 | 90.20  |
| C    |      |     |     |   |     |        |         |        |      |        |
| ATOM | 1975 | ND1 | HIE | X | 103 | 6.960  | -93.493 | 15.906 | 1.00 | 91.25  |
| N    |      |     |     |   |     |        |         |        |      |        |
| ATOM | 1976 | NE2 | HIE | X | 103 | 7.326  | -93.538 | 18.067 | 1.00 | 92.71  |
| N    |      |     |     |   |     |        |         |        |      |        |
| ATOM | 1977 | CE1 | HIE | X | 103 | 6.587  | -94.053 | 17.102 | 1.00 | 95.14  |
| C    |      |     |     |   |     |        |         |        |      |        |
| ATOM | 1978 | N   | PRO | X | 104 | 10.607 | -92.136 | 12.521 | 1.00 | 86.06  |
| N    |      |     |     |   |     |        |         |        |      |        |
| ATOM | 1979 | CA  | PRO | X | 104 | 11.515 | -91.541 | 11.574 | 1.00 | 87.97  |
| C    |      |     |     |   |     |        |         |        |      |        |
| ATOM | 1980 | C   | PRO | X | 104 | 11.478 | -90.035 | 11.701 | 1.00 | 85.61  |
| C    |      |     |     |   |     |        |         |        |      |        |
| ATOM | 1981 | O   | PRO | X | 104 | 12.521 | -89.433 | 11.411 | 1.00 | 82.74  |
| O    |      |     |     |   |     |        |         |        |      |        |
| ATOM | 1982 | CB  | PRO | X | 104 | 11.011 | -92.055 | 10.247 | 1.00 | 92.29  |
| C    |      |     |     |   |     |        |         |        |      |        |
| ATOM | 1983 | CG  | PRO | X | 104 | 9.544  | -92.158 | 10.468 | 1.00 | 92.19  |
| C    |      |     |     |   |     |        |         |        |      |        |
| ATOM | 1984 | CD  | PRO | X | 104 | 9.393  | -92.636 | 11.875 | 1.00 | 88.31  |
| C    |      |     |     |   |     |        |         |        |      |        |
| ATOM | 1985 | N   | GLN | X | 105 | 10.354 | -89.444 | 12.201 | 1.00 | 83.99  |
| N    |      |     |     |   |     |        |         |        |      |        |
| ATOM | 1986 | CA  | GLN | X | 105 | 10.351 | -88.016 | 12.560 | 1.00 | 88.44  |
| C    |      |     |     |   |     |        |         |        |      |        |
| ATOM | 1987 | C   | GLN | X | 105 | 11.542 | -87.654 | 13.409 | 1.00 | 91.48  |
| C    |      |     |     |   |     |        |         |        |      |        |
| ATOM | 1988 | O   | GLN | X | 105 | 12.380 | -86.854 | 12.980 | 1.00 | 89.92  |
| O    |      |     |     |   |     |        |         |        |      |        |

|      |      |     |     |   |     |        |         |        |      |        |
|------|------|-----|-----|---|-----|--------|---------|--------|------|--------|
| ATOM | 1989 | CB  | GLN | X | 105 | 9.116  | -87.452 | 13.299 | 1.00 | 90.43  |
| C    |      |     |     |   |     |        |         |        |      |        |
| ATOM | 1990 | CG  | GLN | X | 105 | 8.161  | -88.432 | 13.819 | 1.00 | 94.62  |
| C    |      |     |     |   |     |        |         |        |      |        |
| ATOM | 1991 | CD  | GLN | X | 105 | 7.536  | -89.133 | 12.669 | 1.00 | 106.39 |
| C    |      |     |     |   |     |        |         |        |      |        |
| ATOM | 1992 | OE1 | GLN | X | 105 | 7.628  | -90.347 | 12.552 | 1.00 | 110.11 |
| O    |      |     |     |   |     |        |         |        |      |        |
| ATOM | 1993 | NE2 | GLN | X | 105 | 6.977  | -88.354 | 11.733 | 1.00 | 120.54 |
| N    |      |     |     |   |     |        |         |        |      |        |
| ATOM | 1994 | N   | GLU | X | 106 | 11.608 | -88.249 | 14.612 | 1.00 | 93.79  |
| N    |      |     |     |   |     |        |         |        |      |        |
| ATOM | 1995 | CA  | GLU | X | 106 | 12.718 | -88.043 | 15.544 | 1.00 | 94.87  |
| C    |      |     |     |   |     |        |         |        |      |        |
| ATOM | 1996 | C   | GLU | X | 106 | 14.057 | -88.422 | 14.883 | 1.00 | 99.78  |
| C    |      |     |     |   |     |        |         |        |      |        |
| ATOM | 1997 | O   | GLU | X | 106 | 14.985 | -87.635 | 14.883 | 1.00 | 106.73 |
| O    |      |     |     |   |     |        |         |        |      |        |
| ATOM | 1998 | CB  | GLU | X | 106 | 12.471 | -88.834 | 16.838 | 1.00 | 100.85 |
| C    |      |     |     |   |     |        |         |        |      |        |
| ATOM | 1999 | CG  | GLU | X | 106 | 11.086 | -88.596 | 17.516 | 1.00 | 107.83 |
| C    |      |     |     |   |     |        |         |        |      |        |
| ATOM | 2000 | CD  | GLU | X | 106 | 10.585 | -89.759 | 18.437 | 1.00 | 110.20 |
| C    |      |     |     |   |     |        |         |        |      |        |
| ATOM | 2001 | OE1 | GLU | X | 106 | 11.170 | -90.887 | 18.452 | 1.00 | 100.92 |
| O    |      |     |     |   |     |        |         |        |      |        |
| ATOM | 2002 | OE2 | GLU | X | 106 | 9.584  | -89.525 | 19.162 | 1.00 | 109.18 |
| O1-  |      |     |     |   |     |        |         |        |      |        |
| ATOM | 2003 | N   | VAL | X | 107 | 14.106 | -89.611 | 14.292 | 1.00 | 102.75 |
| N    |      |     |     |   |     |        |         |        |      |        |
| ATOM | 2004 | CA  | VAL | X | 107 | 15.314 | -90.181 | 13.712 | 1.00 | 111.61 |
| C    |      |     |     |   |     |        |         |        |      |        |
| ATOM | 2005 | C   | VAL | X | 107 | 15.947 | -89.292 | 12.618 | 1.00 | 122.07 |
| C    |      |     |     |   |     |        |         |        |      |        |
| ATOM | 2006 | O   | VAL | X | 107 | 17.185 | -89.276 | 12.425 | 1.00 | 130.28 |
| O    |      |     |     |   |     |        |         |        |      |        |
| ATOM | 2007 | CB  | VAL | X | 107 | 14.892 | -91.497 | 13.102 | 1.00 | 118.59 |
| C    |      |     |     |   |     |        |         |        |      |        |
| ATOM | 2008 | CG1 | VAL | X | 107 | 15.916 | -92.018 | 12.109 | 1.00 | 133.48 |
| C    |      |     |     |   |     |        |         |        |      |        |
| ATOM | 2009 | CG2 | VAL | X | 107 | 14.616 | -92.482 | 14.208 | 1.00 | 116.19 |
| C    |      |     |     |   |     |        |         |        |      |        |
| ATOM | 2010 | N   | SER | X | 108 | 15.101 | -88.527 | 11.927 | 1.00 | 120.24 |
| N    |      |     |     |   |     |        |         |        |      |        |
| ATOM | 2011 | CA  | SER | X | 108 | 15.574 | -87.507 | 10.985 | 1.00 | 117.99 |
| C    |      |     |     |   |     |        |         |        |      |        |
| ATOM | 2012 | C   | SER | X | 108 | 16.205 | -86.345 | 11.697 | 1.00 | 110.24 |
| C    |      |     |     |   |     |        |         |        |      |        |
| ATOM | 2013 | O   | SER | X | 108 | 17.353 | -85.935 | 11.386 | 1.00 | 114.20 |
| O    |      |     |     |   |     |        |         |        |      |        |
| ATOM | 2014 | CB  | SER | X | 108 | 14.374 | -86.967 | 10.148 | 1.00 | 120.61 |
| C    |      |     |     |   |     |        |         |        |      |        |
| ATOM | 2015 | OG  | SER | X | 108 | 14.755 | -86.053 | 9.107  | 1.00 | 117.66 |
| O    |      |     |     |   |     |        |         |        |      |        |

|      |      |     |     |   |     |        |         |        |            |
|------|------|-----|-----|---|-----|--------|---------|--------|------------|
| ATOM | 2016 | N   | MET | X | 109 | 15.458 | -85.799 | 12.646 | 1.00102.02 |
| N    |      |     |     |   |     |        |         |        |            |
| ATOM | 2017 | CA  | MET | X | 109 | 15.821 | -84.638 | 13.371 | 1.00103.99 |
| C    |      |     |     |   |     |        |         |        |            |
| ATOM | 2018 | C   | MET | X | 109 | 17.249 | -84.743 | 13.976 | 1.00 99.89 |
| C    |      |     |     |   |     |        |         |        |            |
| ATOM | 2019 | O   | MET | X | 109 | 18.008 | -83.800 | 13.951 | 1.00106.99 |
| O    |      |     |     |   |     |        |         |        |            |
| ATOM | 2020 | CB  | MET | X | 109 | 14.677 | -84.467 | 14.389 | 1.00110.98 |
| C    |      |     |     |   |     |        |         |        |            |
| ATOM | 2021 | CG  | MET | X | 109 | 15.033 | -84.554 | 15.844 | 1.00117.89 |
| C    |      |     |     |   |     |        |         |        |            |
| ATOM | 2022 | SD  | MET | X | 109 | 15.477 | -82.933 | 16.468 | 1.00130.30 |
| S    |      |     |     |   |     |        |         |        |            |
| ATOM | 2023 | CE  | MET | X | 109 | 15.407 | -81.858 | 14.996 | 1.00137.13 |
| C    |      |     |     |   |     |        |         |        |            |
| ATOM | 2024 | N   | VAL | X | 110 | 17.586 | -85.916 | 14.480 | 1.00 91.70 |
| N    |      |     |     |   |     |        |         |        |            |
| ATOM | 2025 | CA  | VAL | X | 110 | 18.840 | -86.224 | 15.108 | 1.00 94.31 |
| C    |      |     |     |   |     |        |         |        |            |
| ATOM | 2026 | C   | VAL | X | 110 | 19.972 | -86.423 | 14.095 | 1.00 95.96 |
| C    |      |     |     |   |     |        |         |        |            |
| ATOM | 2027 | O   | VAL | X | 110 | 21.063 | -85.832 | 14.213 | 1.00 97.81 |
| O    |      |     |     |   |     |        |         |        |            |
| ATOM | 2028 | CB  | VAL | X | 110 | 18.686 | -87.593 | 15.781 | 1.00 94.32 |
| C    |      |     |     |   |     |        |         |        |            |
| ATOM | 2029 | CG1 | VAL | X | 110 | 20.025 | -88.076 | 16.331 | 1.00 96.01 |
| C    |      |     |     |   |     |        |         |        |            |
| ATOM | 2030 | CG2 | VAL | X | 110 | 17.617 | -87.545 | 16.855 | 1.00 90.62 |
| C    |      |     |     |   |     |        |         |        |            |
| ATOM | 2031 | N   | ARG | X | 111 | 19.701 | -87.277 | 13.106 | 1.00 96.75 |
| N    |      |     |     |   |     |        |         |        |            |
| ATOM | 2032 | CA  | ARG | X | 111 | 20.679 | -87.605 | 12.072 | 1.00106.01 |
| C    |      |     |     |   |     |        |         |        |            |
| ATOM | 2033 | C   | ARG | X | 111 | 21.274 | -86.314 | 11.488 | 1.00108.48 |
| C    |      |     |     |   |     |        |         |        |            |
| ATOM | 2034 | O   | ARG | X | 111 | 22.509 | -86.211 | 11.319 | 1.00106.29 |
| O    |      |     |     |   |     |        |         |        |            |
| ATOM | 2035 | CB  | ARG | X | 111 | 20.080 | -88.525 | 10.975 | 1.00115.71 |
| C    |      |     |     |   |     |        |         |        |            |
| ATOM | 2036 | CG  | ARG | X | 111 | 21.017 | -89.656 | 10.452 | 1.00122.83 |
| C    |      |     |     |   |     |        |         |        |            |
| ATOM | 2037 | CD  | ARG | X | 111 | 20.250 | -90.853 | 9.843  | 1.00127.05 |
| C    |      |     |     |   |     |        |         |        |            |
| ATOM | 2038 | NE  | ARG | X | 111 | 20.426 | -92.119 | 10.588 | 1.00125.74 |
| N    |      |     |     |   |     |        |         |        |            |
| ATOM | 2039 | CZ  | ARG | X | 111 | 19.753 | -93.249 | 10.329 | 1.00124.20 |
| C    |      |     |     |   |     |        |         |        |            |
| ATOM | 2040 | NH1 | ARG | X | 111 | 18.846 | -93.291 | 9.348  | 1.00120.66 |
| N    |      |     |     |   |     |        |         |        |            |
| ATOM | 2041 | NH2 | ARG | X | 111 | 19.993 | -94.351 | 11.043 | 1.00121.62 |
| N    |      |     |     |   |     |        |         |        |            |
| ATOM | 2042 | N   | ASN | X | 112 | 20.413 | -85.328 | 11.244 | 1.00112.20 |
| N    |      |     |     |   |     |        |         |        |            |

|      |      |     |     |   |     |        |         |        |            |
|------|------|-----|-----|---|-----|--------|---------|--------|------------|
| ATOM | 2043 | CA  | ASN | X | 112 | 20.850 | -84.009 | 10.792 | 1.00112.76 |
| C    |      |     |     |   |     |        |         |        |            |
| ATOM | 2044 | C   | ASN | X | 112 | 21.393 | -83.095 | 11.890 | 1.00101.50 |
| C    |      |     |     |   |     |        |         |        |            |
| ATOM | 2045 | O   | ASN | X | 112 | 22.238 | -82.247 | 11.642 | 1.00 96.20 |
| O    |      |     |     |   |     |        |         |        |            |
| ATOM | 2046 | CB  | ASN | X | 112 | 19.712 | -83.330 | 10.096 | 1.00132.67 |
| C    |      |     |     |   |     |        |         |        |            |
| ATOM | 2047 | CG  | ASN | X | 112 | 19.258 | -84.114 | 8.868  | 1.00159.06 |
| C    |      |     |     |   |     |        |         |        |            |
| ATOM | 2048 | OD1 | ASN | X | 112 | 18.505 | -85.085 | 8.987  | 1.00163.62 |
| O    |      |     |     |   |     |        |         |        |            |
| ATOM | 2049 | ND2 | ASN | X | 112 | 19.803 | -83.762 | 7.692  | 1.00171.94 |
| N    |      |     |     |   |     |        |         |        |            |
| ATOM | 2050 | N   | LEU | X | 113 | 20.882 | -83.266 | 13.100 | 1.00 98.71 |
| N    |      |     |     |   |     |        |         |        |            |
| ATOM | 2051 | CA  | LEU | X | 113 | 21.371 | -82.522 | 14.259 | 1.00101.32 |
| C    |      |     |     |   |     |        |         |        |            |
| ATOM | 2052 | C   | LEU | X | 113 | 22.849 | -82.792 | 14.479 | 1.00 98.91 |
| C    |      |     |     |   |     |        |         |        |            |
| ATOM | 2053 | O   | LEU | X | 113 | 23.599 | -81.878 | 14.816 | 1.00123.86 |
| O    |      |     |     |   |     |        |         |        |            |
| ATOM | 2054 | CB  | LEU | X | 113 | 20.638 | -82.890 | 15.506 | 1.00101.75 |
| C    |      |     |     |   |     |        |         |        |            |
| ATOM | 2055 | CG  | LEU | X | 113 | 20.504 | -81.612 | 16.309 | 1.00110.91 |
| C    |      |     |     |   |     |        |         |        |            |
| ATOM | 2056 | CD1 | LEU | X | 113 | 19.656 | -80.565 | 15.590 | 1.00111.91 |
| C    |      |     |     |   |     |        |         |        |            |
| ATOM | 2057 | CD2 | LEU | X | 113 | 19.902 | -81.958 | 17.645 | 1.00124.31 |
| C    |      |     |     |   |     |        |         |        |            |
| ATOM | 2058 | N   | ILE | X | 114 | 23.263 | -84.032 | 14.252 | 1.00 87.33 |
| N    |      |     |     |   |     |        |         |        |            |
| ATOM | 2059 | CA  | ILE | X | 114 | 24.651 | -84.385 | 14.409 | 1.00 86.10 |
| C    |      |     |     |   |     |        |         |        |            |
| ATOM | 2060 | C   | ILE | X | 114 | 25.580 | -83.566 | 13.530 | 1.00 92.19 |
| C    |      |     |     |   |     |        |         |        |            |
| ATOM | 2061 | O   | ILE | X | 114 | 26.680 | -83.225 | 13.943 | 1.00 87.61 |
| O    |      |     |     |   |     |        |         |        |            |
| ATOM | 2062 | CB  | ILE | X | 114 | 24.906 | -85.803 | 14.209 | 1.00 86.76 |
| C    |      |     |     |   |     |        |         |        |            |
| ATOM | 2063 | CG1 | ILE | X | 114 | 24.005 | -86.600 | 15.125 | 1.00 86.36 |
| C    |      |     |     |   |     |        |         |        |            |
| ATOM | 2064 | CG2 | ILE | X | 114 | 26.373 | -86.047 | 14.550 | 1.00 88.66 |
| C    |      |     |     |   |     |        |         |        |            |
| ATOM | 2065 | CD1 | ILE | X | 114 | 24.597 | -86.754 | 16.496 | 1.00 89.16 |
| C    |      |     |     |   |     |        |         |        |            |
| ATOM | 2066 | N   | GLN | X | 115 | 25.152 | -83.297 | 12.321 | 1.00104.60 |
| N    |      |     |     |   |     |        |         |        |            |
| ATOM | 2067 | CA  | GLN | X | 115 | 26.008 | -82.578 | 11.430 | 1.00111.06 |
| C    |      |     |     |   |     |        |         |        |            |
| ATOM | 2068 | C   | GLN | X | 115 | 26.317 | -81.207 | 11.917 | 1.00115.09 |
| C    |      |     |     |   |     |        |         |        |            |
| ATOM | 2069 | O   | GLN | X | 115 | 27.454 | -80.777 | 11.842 | 1.00130.14 |
| O    |      |     |     |   |     |        |         |        |            |



|      |      |     |     |   |     |        |         |        |            |
|------|------|-----|-----|---|-----|--------|---------|--------|------------|
| ATOM | 2070 | CB  | GLN | X | 115 | 25.372 | -82.528 | 10.061 | 1.00114.69 |
| C    |      |     |     |   |     |        |         |        |            |
| ATOM | 2071 | CG  | GLN | X | 115 | 24.783 | -83.867 | 9.666  | 1.00122.04 |
| C    |      |     |     |   |     |        |         |        |            |
| ATOM | 2072 | CD  | GLN | X | 115 | 25.706 | -85.014 | 9.995  | 1.00125.56 |
| C    |      |     |     |   |     |        |         |        |            |
| ATOM | 2073 | NE2 | GLN | X | 115 | 25.261 | -86.119 | 10.276 | 1.00123.54 |
| N    |      |     |     |   |     |        |         |        |            |
| ATOM | 2074 | OE1 | GLN | X | 115 | 27.000 | -84.742 | 9.996  | 1.00126.74 |
| O    |      |     |     |   |     |        |         |        |            |
| ATOM | 2075 | N   | LYS | X | 116 | 25.321 | -80.517 | 12.438 | 1.00110.05 |
| N    |      |     |     |   |     |        |         |        |            |
| ATOM | 2076 | CA  | LYS | X | 116 | 25.564 | -79.168 | 12.896 | 1.00120.92 |
| C    |      |     |     |   |     |        |         |        |            |
| ATOM | 2077 | C   | LYS | X | 116 | 25.830 | -79.060 | 14.390 | 1.00128.31 |
| C    |      |     |     |   |     |        |         |        |            |
| ATOM | 2078 | O   | LYS | X | 116 | 26.860 | -79.498 | 14.873 | 1.00160.00 |
| O    |      |     |     |   |     |        |         |        |            |
| ATOM | 2079 | CB  | LYS | X | 116 | 24.325 | -78.261 | 12.539 | 1.00 0.00  |
| C    |      |     |     |   |     |        |         |        |            |
| ATOM | 2080 | CG  | LYS | X | 116 | 24.134 | -78.119 | 11.015 | 1.00 0.00  |
| C    |      |     |     |   |     |        |         |        |            |
| ATOM | 2081 | CD  | LYS | X | 116 | 22.794 | -77.471 | 10.640 | 1.00 0.00  |
| C    |      |     |     |   |     |        |         |        |            |
| ATOM | 2082 | CE  | LYS | X | 116 | 21.609 | -78.411 | 10.909 | 1.00 0.00  |
| C    |      |     |     |   |     |        |         |        |            |
| ATOM | 2083 | NZ  | LYS | X | 116 | 20.347 | -77.837 | 10.424 | 1.00 0.00  |
| N1+  |      |     |     |   |     |        |         |        |            |
| ATOM | 2084 | N   | ASP | X | 117 | 24.889 | -78.472 | 15.106 | 1.00124.54 |
| N    |      |     |     |   |     |        |         |        |            |
| ATOM | 2085 | CA  | ASP | X | 117 | 24.968 | -78.214 | 16.530 | 1.00129.52 |
| C    |      |     |     |   |     |        |         |        |            |
| ATOM | 2086 | C   | ASP | X | 117 | 25.068 | -79.377 | 17.476 | 1.00121.19 |
| C    |      |     |     |   |     |        |         |        |            |
| ATOM | 2087 | O   | ASP | X | 117 | 25.684 | -79.288 | 18.522 | 1.00106.18 |
| O    |      |     |     |   |     |        |         |        |            |
| ATOM | 2088 | CB  | ASP | X | 117 | 23.723 | -77.443 | 16.945 | 1.00133.39 |
| C    |      |     |     |   |     |        |         |        |            |
| ATOM | 2089 | CG  | ASP | X | 117 | 23.923 | -75.960 | 16.912 | 1.00142.41 |
| C    |      |     |     |   |     |        |         |        |            |
| ATOM | 2090 | OD1 | ASP | X | 117 | 25.049 | -75.513 | 17.192 | 1.00136.88 |
| O    |      |     |     |   |     |        |         |        |            |
| ATOM | 2091 | OD2 | ASP | X | 117 | 22.951 | -75.239 | 16.620 | 1.00150.41 |
| O1-  |      |     |     |   |     |        |         |        |            |
| ATOM | 2092 | N   | ARG | X | 118 | 24.404 | -80.456 | 17.151 | 1.00116.46 |
| N    |      |     |     |   |     |        |         |        |            |
| ATOM | 2093 | CA  | ARG | X | 118 | 24.311 | -81.562 | 18.120 | 1.00104.89 |
| C    |      |     |     |   |     |        |         |        |            |
| ATOM | 2094 | C   | ARG | X | 118 | 23.471 | -81.319 | 19.382 | 1.00 97.39 |
| C    |      |     |     |   |     |        |         |        |            |
| ATOM | 2095 | O   | ARG | X | 118 | 23.345 | -82.201 | 20.228 | 1.00 91.51 |
| O    |      |     |     |   |     |        |         |        |            |
| ATOM | 2096 | CB  | ARG | X | 118 | 25.685 | -82.054 | 18.639 | 1.00 98.77 |
| C    |      |     |     |   |     |        |         |        |            |

|      |      |     |     |   |     |        |         |        |      |        |
|------|------|-----|-----|---|-----|--------|---------|--------|------|--------|
| ATOM | 2097 | CG  | ARG | X | 118 | 26.704 | -82.455 | 17.621 | 1.00 | 101.00 |
| C    |      |     |     |   |     |        |         |        |      |        |
| ATOM | 2098 | CD  | ARG | X | 118 | 27.787 | -83.290 | 18.262 | 1.00 | 104.59 |
| C    |      |     |     |   |     |        |         |        |      |        |
| ATOM | 2099 | NE  | ARG | X | 118 | 28.434 | -82.600 | 19.369 | 1.00 | 118.35 |
| N    |      |     |     |   |     |        |         |        |      |        |
| ATOM | 2100 | CZ  | ARG | X | 118 | 29.597 | -81.935 | 19.298 | 1.00 | 142.88 |
| C    |      |     |     |   |     |        |         |        |      |        |
| ATOM | 2101 | NH1 | ARG | X | 118 | 30.273 | -81.821 | 18.151 | 1.00 | 150.66 |
| N    |      |     |     |   |     |        |         |        |      |        |
| ATOM | 2102 | NH2 | ARG | X | 118 | 30.093 | -81.367 | 20.390 | 1.00 | 153.24 |
| N1+  |      |     |     |   |     |        |         |        |      |        |
| ATOM | 2103 | N   | THR | X | 119 | 22.918 | -80.115 | 19.523 | 1.00 | 90.76  |
| N    |      |     |     |   |     |        |         |        |      |        |
| ATOM | 2104 | CA  | THR | X | 119 | 22.120 | -79.746 | 20.693 | 1.00 | 88.89  |
| C    |      |     |     |   |     |        |         |        |      |        |
| ATOM | 2105 | C   | THR | X | 119 | 20.696 | -79.525 | 20.310 | 1.00 | 84.12  |
| C    |      |     |     |   |     |        |         |        |      |        |
| ATOM | 2106 | O   | THR | X | 119 | 20.389 | -78.852 | 19.288 | 1.00 | 87.89  |
| O    |      |     |     |   |     |        |         |        |      |        |
| ATOM | 2107 | CB  | THR | X | 119 | 22.541 | -78.423 | 21.452 | 1.00 | 91.20  |
| C    |      |     |     |   |     |        |         |        |      |        |
| ATOM | 2108 | OG1 | THR | X | 119 | 22.785 | -77.360 | 20.538 | 1.00 | 100.43 |
| O    |      |     |     |   |     |        |         |        |      |        |
| ATOM | 2109 | CG2 | THR | X | 119 | 23.755 | -78.606 | 22.320 | 1.00 | 90.27  |
| C    |      |     |     |   |     |        |         |        |      |        |
| ATOM | 2110 | N   | PHE | X | 120 | 19.835 | -80.093 | 21.143 | 1.00 | 77.66  |
| N    |      |     |     |   |     |        |         |        |      |        |
| ATOM | 2111 | CA  | PHE | X | 120 | 18.399 | -79.967 | 21.011 | 1.00 | 78.80  |
| C    |      |     |     |   |     |        |         |        |      |        |
| ATOM | 2112 | C   | PHE | X | 120 | 17.862 | -79.507 | 22.350 | 1.00 | 81.74  |
| C    |      |     |     |   |     |        |         |        |      |        |
| ATOM | 2113 | O   | PHE | X | 120 | 18.611 | -79.458 | 23.314 | 1.00 | 80.97  |
| O    |      |     |     |   |     |        |         |        |      |        |
| ATOM | 2114 | CB  | PHE | X | 120 | 17.760 | -81.283 | 20.676 | 1.00 | 75.23  |
| C    |      |     |     |   |     |        |         |        |      |        |
| ATOM | 2115 | CG  | PHE | X | 120 | 18.038 | -82.330 | 21.658 | 1.00 | 72.73  |
| C    |      |     |     |   |     |        |         |        |      |        |
| ATOM | 2116 | CD1 | PHE | X | 120 | 19.335 | -82.773 | 21.852 | 1.00 | 71.99  |
| C    |      |     |     |   |     |        |         |        |      |        |
| ATOM | 2117 | CD2 | PHE | X | 120 | 17.012 | -82.934 | 22.320 | 1.00 | 72.23  |
| C    |      |     |     |   |     |        |         |        |      |        |
| ATOM | 2118 | CE1 | PHE | X | 120 | 19.578 | -83.873 | 22.606 | 1.00 | 72.43  |
| C    |      |     |     |   |     |        |         |        |      |        |
| ATOM | 2119 | CE2 | PHE | X | 120 | 17.250 | -84.017 | 23.109 | 1.00 | 73.66  |
| C    |      |     |     |   |     |        |         |        |      |        |
| ATOM | 2120 | CZ  | PHE | X | 120 | 18.531 | -84.504 | 23.233 | 1.00 | 73.53  |
| C    |      |     |     |   |     |        |         |        |      |        |
| ATOM | 2121 | N   | ALA | X | 121 | 16.572 | -79.221 | 22.392 | 1.00 | 85.57  |
| N    |      |     |     |   |     |        |         |        |      |        |
| ATOM | 2122 | CA  | ALA | X | 121 | 15.968 | -78.507 | 23.495 | 1.00 | 84.79  |
| C    |      |     |     |   |     |        |         |        |      |        |
| ATOM | 2123 | C   | ALA | X | 121 | 15.009 | -79.437 | 24.290 | 1.00 | 83.23  |
| C    |      |     |     |   |     |        |         |        |      |        |

|      |      |     |     |   |     |        |         |        |      |        |
|------|------|-----|-----|---|-----|--------|---------|--------|------|--------|
| ATOM | 2124 | O   | ALA | X | 121 | 14.195 | -80.185 | 23.709 | 1.00 | 76.28  |
| O    |      |     |     |   |     |        |         |        |      |        |
| ATOM | 2125 | CB  | ALA | X | 121 | 15.214 | -77.340 | 22.921 | 1.00 | 84.33  |
| C    |      |     |     |   |     |        |         |        |      |        |
| ATOM | 2126 | N   | VAL | X | 122 | 15.134 | -79.393 | 25.613 | 1.00 | 82.98  |
| N    |      |     |     |   |     |        |         |        |      |        |
| ATOM | 2127 | CA  | VAL | X | 122 | 14.287 | -80.180 | 26.461 | 1.00 | 84.79  |
| C    |      |     |     |   |     |        |         |        |      |        |
| ATOM | 2128 | C   | VAL | X | 122 | 13.485 | -79.245 | 27.325 | 1.00 | 87.32  |
| C    |      |     |     |   |     |        |         |        |      |        |
| ATOM | 2129 | O   | VAL | X | 122 | 14.049 | -78.303 | 27.906 | 1.00 | 97.07  |
| O    |      |     |     |   |     |        |         |        |      |        |
| ATOM | 2130 | CB  | VAL | X | 122 | 15.183 | -81.016 | 27.299 | 1.00 | 88.22  |
| C    |      |     |     |   |     |        |         |        |      |        |
| ATOM | 2131 | CG1 | VAL | X | 122 | 14.351 | -81.848 | 28.239 | 1.00 | 95.39  |
| C    |      |     |     |   |     |        |         |        |      |        |
| ATOM | 2132 | CG2 | VAL | X | 122 | 16.076 | -81.850 | 26.384 | 1.00 | 87.59  |
| C    |      |     |     |   |     |        |         |        |      |        |
| ATOM | 2133 | N   | LEU | X | 123 | 12.180 | -79.512 | 27.467 | 1.00 | 88.58  |
| N    |      |     |     |   |     |        |         |        |      |        |
| ATOM | 2134 | CA  | LEU | X | 123 | 11.278 | -78.552 | 28.094 | 1.00 | 87.76  |
| C    |      |     |     |   |     |        |         |        |      |        |
| ATOM | 2135 | C   | LEU | X | 123 | 10.796 | -79.004 | 29.481 | 1.00 | 85.48  |
| C    |      |     |     |   |     |        |         |        |      |        |
| ATOM | 2136 | O   | LEU | X | 123 | 10.423 | -80.125 | 29.671 | 1.00 | 85.68  |
| O    |      |     |     |   |     |        |         |        |      |        |
| ATOM | 2137 | CB  | LEU | X | 123 | 10.117 | -78.173 | 27.146 | 1.00 | 87.12  |
| C    |      |     |     |   |     |        |         |        |      |        |
| ATOM | 2138 | CG  | LEU | X | 123 | 10.539 | -77.616 | 25.745 | 1.00 | 86.33  |
| C    |      |     |     |   |     |        |         |        |      |        |
| ATOM | 2139 | CD1 | LEU | X | 123 | 9.347  | -77.177 | 24.916 | 1.00 | 86.46  |
| C    |      |     |     |   |     |        |         |        |      |        |
| ATOM | 2140 | CD2 | LEU | X | 123 | 11.523 | -76.461 | 25.779 | 1.00 | 84.25  |
| C    |      |     |     |   |     |        |         |        |      |        |
| ATOM | 2141 | N   | ALA | X | 124 | 10.761 | -78.055 | 30.397 | 1.00 | 86.69  |
| N    |      |     |     |   |     |        |         |        |      |        |
| ATOM | 2142 | CA  | ALA | X | 124 | 10.027 | -78.173 | 31.624 | 1.00 | 95.89  |
| C    |      |     |     |   |     |        |         |        |      |        |
| ATOM | 2143 | C   | ALA | X | 124 | 8.536  | -77.839 | 31.318 | 1.00 | 100.13 |
| C    |      |     |     |   |     |        |         |        |      |        |
| ATOM | 2144 | O   | ALA | X | 124 | 8.190  | -76.799 | 30.715 | 1.00 | 97.88  |
| O    |      |     |     |   |     |        |         |        |      |        |
| ATOM | 2145 | CB  | ALA | X | 124 | 10.599 | -77.236 | 32.645 | 1.00 | 99.69  |
| C    |      |     |     |   |     |        |         |        |      |        |
| ATOM | 2146 | N   | TYR | X | 125 | 7.697  | -78.804 | 31.590 | 1.00 | 108.29 |
| N    |      |     |     |   |     |        |         |        |      |        |
| ATOM | 2147 | CA  | TYR | X | 125 | 6.270  | -78.579 | 31.629 | 1.00 | 117.79 |
| C    |      |     |     |   |     |        |         |        |      |        |
| ATOM | 2148 | C   | TYR | X | 125 | 5.840  | -78.811 | 33.101 | 1.00 | 120.50 |
| C    |      |     |     |   |     |        |         |        |      |        |
| ATOM | 2149 | O   | TYR | X | 125 | 6.010  | -79.934 | 33.608 | 1.00 | 126.88 |
| O    |      |     |     |   |     |        |         |        |      |        |
| ATOM | 2150 | CB  | TYR | X | 125 | 5.599  | -79.611 | 30.705 | 1.00 | 129.87 |
| C    |      |     |     |   |     |        |         |        |      |        |

|      |      |     |     |   |     |        |         |        |            |
|------|------|-----|-----|---|-----|--------|---------|--------|------------|
| ATOM | 2151 | CG  | TYR | X | 125 | 5.646  | -79.327 | 29.210 | 1.00133.82 |
| C    |      |     |     |   |     |        |         |        |            |
| ATOM | 2152 | CD1 | TYR | X | 125 | 6.697  | -79.793 | 28.409 | 1.00132.65 |
| C    |      |     |     |   |     |        |         |        |            |
| ATOM | 2153 | CD2 | TYR | X | 125 | 4.531  | -78.772 | 28.579 | 1.00145.30 |
| C    |      |     |     |   |     |        |         |        |            |
| ATOM | 2154 | CE1 | TYR | X | 125 | 6.676  | -79.602 | 27.040 | 1.00140.68 |
| C    |      |     |     |   |     |        |         |        |            |
| ATOM | 2155 | CE2 | TYR | X | 125 | 4.500  | -78.574 | 27.221 | 1.00147.48 |
| C    |      |     |     |   |     |        |         |        |            |
| ATOM | 2156 | CZ  | TYR | X | 125 | 5.574  | -78.972 | 26.460 | 1.00150.69 |
| C    |      |     |     |   |     |        |         |        |            |
| ATOM | 2157 | OH  | TYR | X | 125 | 5.539  | -78.708 | 25.122 | 1.00157.65 |
| O    |      |     |     |   |     |        |         |        |            |
| ATOM | 2158 | N   | SER | X | 126 | 5.167  | -77.833 | 33.748 | 1.00121.11 |
| N    |      |     |     |   |     |        |         |        |            |
| ATOM | 2159 | CA  | SER | X | 126 | 4.132  | -78.172 | 34.778 | 1.00123.88 |
| C    |      |     |     |   |     |        |         |        |            |
| ATOM | 2160 | C   | SER | X | 126 | 3.011  | -78.921 | 33.989 | 1.00131.03 |
| C    |      |     |     |   |     |        |         |        |            |
| ATOM | 2161 | O   | SER | X | 126 | 2.569  | -78.404 | 32.981 | 1.00160.28 |
| O    |      |     |     |   |     |        |         |        |            |
| ATOM | 2162 | CB  | SER | X | 126 | 3.576  | -76.919 | 35.494 | 1.00114.15 |
| C    |      |     |     |   |     |        |         |        |            |
| ATOM | 2163 | OG  | SER | X | 126 | 2.244  | -77.156 | 35.993 | 1.00109.41 |
| O    |      |     |     |   |     |        |         |        |            |
| ATOM | 2164 | N   | ASN | X | 127 | 2.519  | -80.057 | 34.442 | 1.00125.50 |
| N    |      |     |     |   |     |        |         |        |            |
| ATOM | 2165 | CA  | ASN | X | 127 | 1.534  | -80.763 | 33.636 | 1.00116.61 |
| C    |      |     |     |   |     |        |         |        |            |
| ATOM | 2166 | C   | ASN | X | 127 | 0.392  | -79.845 | 33.337 | 1.00120.62 |
| C    |      |     |     |   |     |        |         |        |            |
| ATOM | 2167 | O   | ASN | X | 127 | -0.296 | -79.987 | 32.346 | 1.00108.98 |
| O    |      |     |     |   |     |        |         |        |            |
| ATOM | 2168 | CB  | ASN | X | 127 | 1.030  | -82.014 | 34.379 | 1.00 0.00  |
| C    |      |     |     |   |     |        |         |        |            |
| ATOM | 2169 | CG  | ASN | X | 127 | 2.144  | -83.018 | 34.696 | 1.00 0.00  |
| C    |      |     |     |   |     |        |         |        |            |
| ATOM | 2170 | ND2 | ASN | X | 127 | 2.644  | -83.063 | 35.818 | 1.00 0.00  |
| N    |      |     |     |   |     |        |         |        |            |
| ATOM | 2171 | OD1 | ASN | X | 127 | 2.544  | -83.815 | 33.701 | 1.00 0.00  |
| O    |      |     |     |   |     |        |         |        |            |
| ATOM | 2172 | N   | VAL | X | 128 | 0.188  | -78.887 | 34.207 | 1.00132.88 |
| N    |      |     |     |   |     |        |         |        |            |
| ATOM | 2173 | CA  | VAL | X | 128 | -0.881 | -77.940 | 34.010 | 1.00138.55 |
| C    |      |     |     |   |     |        |         |        |            |
| ATOM | 2174 | C   | VAL | X | 128 | -0.674 | -77.124 | 32.741 | 1.00140.37 |
| C    |      |     |     |   |     |        |         |        |            |
| ATOM | 2175 | O   | VAL | X | 128 | -1.624 | -76.605 | 32.169 | 1.00136.21 |
| O    |      |     |     |   |     |        |         |        |            |
| ATOM | 2176 | CB  | VAL | X | 128 | -1.002 | -77.031 | 35.257 | 1.00 0.00  |
| C    |      |     |     |   |     |        |         |        |            |
| ATOM | 2177 | CG1 | VAL | X | 128 | -2.134 | -76.003 | 35.093 | 1.00 0.00  |
| C    |      |     |     |   |     |        |         |        |            |

|      |      |     |     |   |     |        |         |        |      |        |
|------|------|-----|-----|---|-----|--------|---------|--------|------|--------|
| ATOM | 2178 | CG2 | VAL | X | 128 | -1.269 | -77.850 | 36.534 | 1.00 | 0.00   |
| C    |      |     |     |   |     |        |         |        |      |        |
| ATOM | 2179 | N   | GLN | X | 129 | 0.565  | -77.003 | 32.294 | 1.00 | 139.80 |
| N    |      |     |     |   |     |        |         |        |      |        |
| ATOM | 2180 | CA  | GLN | X | 129 | 0.849  | -76.153 | 31.149 | 1.00 | 132.64 |
| C    |      |     |     |   |     |        |         |        |      |        |
| ATOM | 2181 | C   | GLN | X | 129 | 0.094  | -76.510 | 29.893 | 1.00 | 142.64 |
| C    |      |     |     |   |     |        |         |        |      |        |
| ATOM | 2182 | O   | GLN | X | 129 | -0.372 | -75.616 | 29.193 | 1.00 | 156.92 |
| O    |      |     |     |   |     |        |         |        |      |        |
| ATOM | 2183 | CB  | GLN | X | 129 | 2.370  | -76.148 | 30.901 | 1.00 | 0.00   |
| C    |      |     |     |   |     |        |         |        |      |        |
| ATOM | 2184 | CG  | GLN | X | 129 | 3.190  | -75.556 | 32.066 | 1.00 | 0.00   |
| C    |      |     |     |   |     |        |         |        |      |        |
| ATOM | 2185 | CD  | GLN | X | 129 | 3.346  | -74.033 | 32.014 | 1.00 | 0.00   |
| C    |      |     |     |   |     |        |         |        |      |        |
| ATOM | 2186 | NE2 | GLN | X | 129 | 4.466  | -73.527 | 32.042 | 1.00 | 0.00   |
| N    |      |     |     |   |     |        |         |        |      |        |
| ATOM | 2187 | OE1 | GLN | X | 129 | 2.244  | -73.280 | 31.966 | 1.00 | 0.00   |
| O    |      |     |     |   |     |        |         |        |      |        |
| ATOM | 2188 | N   | GLU | X | 130 | -0.044 | -77.790 | 29.593 | 1.00 | 144.40 |
| N    |      |     |     |   |     |        |         |        |      |        |
| ATOM | 2189 | CA  | GLU | X | 130 | -0.775 | -78.162 | 28.393 | 1.00 | 139.07 |
| C    |      |     |     |   |     |        |         |        |      |        |
| ATOM | 2190 | C   | GLU | X | 130 | -0.191 | -77.431 | 27.199 | 1.00 | 148.07 |
| C    |      |     |     |   |     |        |         |        |      |        |
| ATOM | 2191 | O   | GLU | X | 130 | -0.917 | -76.835 | 26.410 | 1.00 | 145.49 |
| O    |      |     |     |   |     |        |         |        |      |        |
| ATOM | 2192 | CB  | GLU | X | 130 | -2.303 | -77.808 | 28.537 | 1.00 | 0.00   |
| C    |      |     |     |   |     |        |         |        |      |        |
| ATOM | 2193 | CG  | GLU | X | 130 | -2.995 | -78.630 | 29.638 | 1.00 | 0.00   |
| C    |      |     |     |   |     |        |         |        |      |        |
| ATOM | 2194 | CD  | GLU | X | 130 | -3.050 | -80.124 | 29.314 | 1.00 | 0.00   |
| C    |      |     |     |   |     |        |         |        |      |        |
| ATOM | 2195 | OE1 | GLU | X | 130 | -3.935 | -80.638 | 28.633 | 1.00 | 0.00   |
| O    |      |     |     |   |     |        |         |        |      |        |
| ATOM | 2196 | OE2 | GLU | X | 130 | -2.022 | -80.845 | 29.851 | 1.00 | 0.00   |
| O1-  |      |     |     |   |     |        |         |        |      |        |
| ATOM | 2197 | N   | ARG | X | 131 | 1.132  | -77.475 | 27.106 | 1.00 | 149.81 |
| N    |      |     |     |   |     |        |         |        |      |        |
| ATOM | 2198 | CA  | ARG | X | 131 | 1.911  | -76.890 | 26.014 | 1.00 | 150.02 |
| C    |      |     |     |   |     |        |         |        |      |        |
| ATOM | 2199 | C   | ARG | X | 131 | 2.479  | -75.492 | 26.138 | 1.00 | 136.08 |
| C    |      |     |     |   |     |        |         |        |      |        |
| ATOM | 2200 | O   | ARG | X | 131 | 3.264  | -75.098 | 25.285 | 1.00 | 141.48 |
| O    |      |     |     |   |     |        |         |        |      |        |
| ATOM | 2201 | CB  | ARG | X | 131 | 1.056  | -77.063 | 24.737 | 1.00 | 0.00   |
| C    |      |     |     |   |     |        |         |        |      |        |
| ATOM | 2202 | CG  | ARG | X | 131 | 1.910  | -77.196 | 23.462 | 1.00 | 0.00   |
| C    |      |     |     |   |     |        |         |        |      |        |
| ATOM | 2203 | CD  | ARG | X | 131 | 1.073  | -77.559 | 22.227 | 1.00 | 0.00   |
| C    |      |     |     |   |     |        |         |        |      |        |
| ATOM | 2204 | NE  | ARG | X | 131 | 0.212  | -76.446 | 21.793 | 1.00 | 0.00   |
| N    |      |     |     |   |     |        |         |        |      |        |

|      |      |     |     |   |     |        |         |        |      |        |
|------|------|-----|-----|---|-----|--------|---------|--------|------|--------|
| ATOM | 2205 | CZ  | ARG | X | 131 | -1.061 | -76.541 | 21.364 | 1.00 | 0.00   |
| C    |      |     |     |   |     |        |         |        |      |        |
| ATOM | 2206 | NH1 | ARG | X | 131 | -1.704 | -77.716 | 21.289 | 1.00 | 0.00   |
| N    |      |     |     |   |     |        |         |        |      |        |
| ATOM | 2207 | NH2 | ARG | X | 131 | -1.703 | -75.423 | 20.999 | 1.00 | 0.00   |
| N1+  |      |     |     |   |     |        |         |        |      |        |
| ATOM | 2208 | N   | GLU | X | 132 | 2.124  | -74.747 | 27.171 | 1.00 | 126.47 |
| N    |      |     |     |   |     |        |         |        |      |        |
| ATOM | 2209 | CA  | GLU | X | 132 | 2.706  | -73.432 | 27.318 | 1.00 | 119.66 |
| C    |      |     |     |   |     |        |         |        |      |        |
| ATOM | 2210 | C   | GLU | X | 132 | 4.000  | -73.709 | 28.036 | 1.00 | 124.77 |
| C    |      |     |     |   |     |        |         |        |      |        |
| ATOM | 2211 | O   | GLU | X | 132 | 4.139  | -73.401 | 29.202 | 1.00 | 132.55 |
| O    |      |     |     |   |     |        |         |        |      |        |
| ATOM | 2212 | CB  | GLU | X | 132 | 1.754  | -72.441 | 28.147 | 1.00 | 0.00   |
| C    |      |     |     |   |     |        |         |        |      |        |
| ATOM | 2213 | CG  | GLU | X | 132 | 2.344  | -71.025 | 28.266 | 1.00 | 0.00   |
| C    |      |     |     |   |     |        |         |        |      |        |
| ATOM | 2214 | CD  | GLU | X | 132 | 2.614  | -70.394 | 26.898 | 1.00 | 0.00   |
| C    |      |     |     |   |     |        |         |        |      |        |
| ATOM | 2215 | OE1 | GLU | X | 132 | 1.728  | -69.970 | 26.158 | 1.00 | 0.00   |
| O    |      |     |     |   |     |        |         |        |      |        |
| ATOM | 2216 | OE2 | GLU | X | 132 | 3.937  | -70.350 | 26.565 | 1.00 | 0.00   |
| O1-  |      |     |     |   |     |        |         |        |      |        |
| ATOM | 2217 | N   | ALA | X | 133 | 4.953  | -74.318 | 27.352 | 1.00 | 120.47 |
| N    |      |     |     |   |     |        |         |        |      |        |
| ATOM | 2218 | CA  | ALA | X | 133 | 6.251  | -74.619 | 28.011 | 1.00 | 120.48 |
| C    |      |     |     |   |     |        |         |        |      |        |
| ATOM | 2219 | C   | ALA | X | 133 | 7.013  | -73.310 | 28.101 | 1.00 | 118.96 |
| C    |      |     |     |   |     |        |         |        |      |        |
| ATOM | 2220 | O   | ALA | X | 133 | 6.974  | -72.516 | 27.142 | 1.00 | 122.40 |
| O    |      |     |     |   |     |        |         |        |      |        |
| ATOM | 2221 | CB  | ALA | X | 133 | 7.062  | -75.611 | 27.215 | 1.00 | 121.85 |
| C    |      |     |     |   |     |        |         |        |      |        |
| ATOM | 2222 | N   | GLN | X | 134 | 7.632  | -73.040 | 29.254 | 1.00 | 115.37 |
| N    |      |     |     |   |     |        |         |        |      |        |
| ATOM | 2223 | CA  | GLN | X | 134 | 8.096  | -71.660 | 29.546 | 1.00 | 116.82 |
| C    |      |     |     |   |     |        |         |        |      |        |
| ATOM | 2224 | C   | GLN | X | 134 | 9.568  | -71.600 | 29.900 | 1.00 | 111.47 |
| C    |      |     |     |   |     |        |         |        |      |        |
| ATOM | 2225 | O   | GLN | X | 134 | 10.250 | -70.641 | 29.532 | 1.00 | 102.24 |
| O    |      |     |     |   |     |        |         |        |      |        |
| ATOM | 2226 | CB  | GLN | X | 134 | 7.168  | -70.932 | 30.577 | 1.00 | 121.12 |
| C    |      |     |     |   |     |        |         |        |      |        |
| ATOM | 2227 | CG  | GLN | X | 134 | 5.771  | -70.543 | 30.006 | 1.00 | 121.58 |
| C    |      |     |     |   |     |        |         |        |      |        |
| ATOM | 2228 | CD  | GLN | X | 134 | 5.160  | -69.216 | 30.525 | 1.00 | 120.21 |
| C    |      |     |     |   |     |        |         |        |      |        |
| ATOM | 2229 | OE1 | GLN | X | 134 | 4.259  | -68.656 | 29.889 | 1.00 | 113.24 |
| O    |      |     |     |   |     |        |         |        |      |        |
| ATOM | 2230 | NE2 | GLN | X | 134 | 5.604  | -68.755 | 31.699 | 1.00 | 119.64 |
| N    |      |     |     |   |     |        |         |        |      |        |
| ATOM | 2231 | N   | PHE | X | 135 | 10.111 | -72.709 | 30.385 | 1.00 | 111.45 |
| N    |      |     |     |   |     |        |         |        |      |        |

|      |      |     |     |   |     |        |         |        |      |        |
|------|------|-----|-----|---|-----|--------|---------|--------|------|--------|
| ATOM | 2232 | CA  | PHE | X | 135 | 11.574 | -72.853 | 30.611 | 1.00 | 117.46 |
| C    |      |     |     |   |     |        |         |        |      |        |
| ATOM | 2233 | C   | PHE | X | 135 | 12.034 | -74.250 | 30.175 | 1.00 | 99.19  |
| C    |      |     |     |   |     |        |         |        |      |        |
| ATOM | 2234 | O   | PHE | X | 135 | 11.224 | -75.157 | 29.939 | 1.00 | 91.18  |
| O    |      |     |     |   |     |        |         |        |      |        |
| ATOM | 2235 | CB  | PHE | X | 135 | 11.982 | -72.606 | 32.114 | 1.00 | 142.32 |
| C    |      |     |     |   |     |        |         |        |      |        |
| ATOM | 2236 | CG  | PHE | X | 135 | 11.324 | -71.376 | 32.762 | 1.00 | 178.57 |
| C    |      |     |     |   |     |        |         |        |      |        |
| ATOM | 2237 | CD1 | PHE | X | 135 | 9.984  | -71.403 | 33.190 | 1.00 | 191.54 |
| C    |      |     |     |   |     |        |         |        |      |        |
| ATOM | 2238 | CD2 | PHE | X | 135 | 12.061 | -70.220 | 33.015 | 1.00 | 195.42 |
| C    |      |     |     |   |     |        |         |        |      |        |
| ATOM | 2239 | CE1 | PHE | X | 135 | 9.384  | -70.277 | 33.772 | 1.00 | 182.14 |
| C    |      |     |     |   |     |        |         |        |      |        |
| ATOM | 2240 | CE2 | PHE | X | 135 | 11.465 | -69.102 | 33.616 | 1.00 | 193.52 |
| C    |      |     |     |   |     |        |         |        |      |        |
| ATOM | 2241 | CZ  | PHE | X | 135 | 10.126 | -69.130 | 33.983 | 1.00 | 181.05 |
| C    |      |     |     |   |     |        |         |        |      |        |
| ATOM | 2242 | N   | GLY | X | 136 | 13.347 | -74.414 | 30.078 | 1.00 | 87.91  |
| N    |      |     |     |   |     |        |         |        |      |        |
| ATOM | 2243 | CA  | GLY | X | 136 | 13.952 | -75.705 | 29.695 | 1.00 | 82.78  |
| C    |      |     |     |   |     |        |         |        |      |        |
| ATOM | 2244 | C   | GLY | X | 136 | 15.457 | -75.739 | 29.731 | 1.00 | 82.16  |
| C    |      |     |     |   |     |        |         |        |      |        |
| ATOM | 2245 | O   | GLY | X | 136 | 16.077 | -74.819 | 30.229 | 1.00 | 79.08  |
| O    |      |     |     |   |     |        |         |        |      |        |
| ATOM | 2246 | N   | THR | X | 137 | 16.040 | -76.690 | 29.035 | 1.00 | 88.66  |
| N    |      |     |     |   |     |        |         |        |      |        |
| ATOM | 2247 | CA  | THR | X | 137 | 17.492 | -76.963 | 29.150 | 1.00 | 90.08  |
| C    |      |     |     |   |     |        |         |        |      |        |
| ATOM | 2248 | C   | THR | X | 137 | 18.045 | -77.524 | 27.817 | 1.00 | 85.59  |
| C    |      |     |     |   |     |        |         |        |      |        |
| ATOM | 2249 | O   | THR | X | 137 | 17.451 | -78.414 | 27.204 | 1.00 | 78.58  |
| O    |      |     |     |   |     |        |         |        |      |        |
| ATOM | 2250 | CB  | THR | X | 137 | 17.645 | -77.977 | 30.267 | 1.00 | 93.88  |
| C    |      |     |     |   |     |        |         |        |      |        |
| ATOM | 2251 | OG1 | THR | X | 137 | 16.656 | -77.685 | 31.292 | 1.00 | 88.34  |
| O    |      |     |     |   |     |        |         |        |      |        |
| ATOM | 2252 | CG2 | THR | X | 137 | 19.065 | -77.954 | 30.803 | 1.00 | 97.93  |
| C    |      |     |     |   |     |        |         |        |      |        |
| ATOM | 2253 | N   | THR | X | 138 | 19.177 | -76.980 | 27.364 | 1.00 | 87.63  |
| N    |      |     |     |   |     |        |         |        |      |        |
| ATOM | 2254 | CA  | THR | X | 138 | 19.848 | -77.513 | 26.192 | 1.00 | 92.82  |
| C    |      |     |     |   |     |        |         |        |      |        |
| ATOM | 2255 | C   | THR | X | 138 | 20.497 | -78.830 | 26.577 | 1.00 | 94.08  |
| C    |      |     |     |   |     |        |         |        |      |        |
| ATOM | 2256 | O   | THR | X | 138 | 21.088 | -78.954 | 27.652 | 1.00 | 92.04  |
| O    |      |     |     |   |     |        |         |        |      |        |
| ATOM | 2257 | CB  | THR | X | 138 | 20.889 | -76.524 | 25.579 | 1.00 | 95.80  |
| C    |      |     |     |   |     |        |         |        |      |        |
| ATOM | 2258 | OG1 | THR | X | 138 | 21.961 | -76.251 | 26.497 | 1.00 | 99.71  |
| O    |      |     |     |   |     |        |         |        |      |        |

|      |      |     |     |   |     |        |         |        |      |        |
|------|------|-----|-----|---|-----|--------|---------|--------|------|--------|
| ATOM | 2259 | CG2 | THR | X | 138 | 20.210 | -75.220 | 25.198 | 1.00 | 97.25  |
| C    |      |     |     |   |     |        |         |        |      |        |
| ATOM | 2260 | N   | ALA | X | 139 | 20.350 | -79.832 | 25.713 | 1.00 | 91.41  |
| N    |      |     |     |   |     |        |         |        |      |        |
| ATOM | 2261 | CA  | ALA | X | 139 | 21.094 | -81.048 | 25.845 | 1.00 | 86.20  |
| C    |      |     |     |   |     |        |         |        |      |        |
| ATOM | 2262 | C   | ALA | X | 139 | 21.888 | -81.259 | 24.585 | 1.00 | 83.72  |
| C    |      |     |     |   |     |        |         |        |      |        |
| ATOM | 2263 | O   | ALA | X | 139 | 21.388 | -81.093 | 23.477 | 1.00 | 86.47  |
| O    |      |     |     |   |     |        |         |        |      |        |
| ATOM | 2264 | CB  | ALA | X | 139 | 20.143 | -82.186 | 26.041 | 1.00 | 87.65  |
| C    |      |     |     |   |     |        |         |        |      |        |
| ATOM | 2265 | N   | GLU | X | 140 | 23.131 | -81.641 | 24.753 | 1.00 | 81.55  |
| N    |      |     |     |   |     |        |         |        |      |        |
| ATOM | 2266 | CA  | GLU | X | 140 | 24.139 | -81.730 | 23.694 | 1.00 | 90.65  |
| C    |      |     |     |   |     |        |         |        |      |        |
| ATOM | 2267 | C   | GLU | X | 140 | 24.497 | -83.173 | 23.512 | 1.00 | 88.24  |
| C    |      |     |     |   |     |        |         |        |      |        |
| ATOM | 2268 | O   | GLU | X | 140 | 24.840 | -83.824 | 24.500 | 1.00 | 81.56  |
| O    |      |     |     |   |     |        |         |        |      |        |
| ATOM | 2269 | CB  | GLU | X | 140 | 25.382 | -81.016 | 24.196 | 1.00 | 102.78 |
| C    |      |     |     |   |     |        |         |        |      |        |
| ATOM | 2270 | CG  | GLU | X | 140 | 26.576 | -80.922 | 23.271 | 1.00 | 112.76 |
| C    |      |     |     |   |     |        |         |        |      |        |
| ATOM | 2271 | CD  | GLU | X | 140 | 27.610 | -80.018 | 23.888 | 1.00 | 129.97 |
| C    |      |     |     |   |     |        |         |        |      |        |
| ATOM | 2272 | OE1 | GLU | X | 140 | 27.611 | -78.797 | 23.571 | 1.00 | 153.13 |
| O    |      |     |     |   |     |        |         |        |      |        |
| ATOM | 2273 | OE2 | GLU | X | 140 | 28.248 | -80.481 | 24.856 | 1.00 | 134.09 |
| O1-  |      |     |     |   |     |        |         |        |      |        |
| ATOM | 2274 | N   | ILE | X | 141 | 24.432 | -83.691 | 22.275 | 1.00 | 91.39  |
| N    |      |     |     |   |     |        |         |        |      |        |
| ATOM | 2275 | CA  | ILE | X | 141 | 24.750 | -85.082 | 22.079 | 1.00 | 90.61  |
| C    |      |     |     |   |     |        |         |        |      |        |
| ATOM | 2276 | C   | ILE | X | 141 | 26.255 | -85.332 | 22.076 | 1.00 | 90.47  |
| C    |      |     |     |   |     |        |         |        |      |        |
| ATOM | 2277 | O   | ILE | X | 141 | 27.011 | -84.722 | 21.326 | 1.00 | 90.85  |
| O    |      |     |     |   |     |        |         |        |      |        |
| ATOM | 2278 | CB  | ILE | X | 141 | 24.037 | -85.716 | 20.917 | 1.00 | 94.17  |
| C    |      |     |     |   |     |        |         |        |      |        |
| ATOM | 2279 | CG1 | ILE | X | 141 | 22.576 | -85.240 | 20.896 | 1.00 | 97.27  |
| C    |      |     |     |   |     |        |         |        |      |        |
| ATOM | 2280 | CG2 | ILE | X | 141 | 24.083 | -87.241 | 21.088 | 1.00 | 95.30  |
| C    |      |     |     |   |     |        |         |        |      |        |
| ATOM | 2281 | CD1 | ILE | X | 141 | 22.033 | -84.977 | 19.511 | 1.00 | 98.71  |
| C    |      |     |     |   |     |        |         |        |      |        |
| ATOM | 2282 | N   | TYR | X | 142 | 26.688 | -86.231 | 22.961 | 1.00 | 89.63  |
| N    |      |     |     |   |     |        |         |        |      |        |
| ATOM | 2283 | CA  | TYR | X | 142 | 28.106 | -86.612 | 23.060 | 1.00 | 94.00  |
| C    |      |     |     |   |     |        |         |        |      |        |
| ATOM | 2284 | C   | TYR | X | 142 | 28.408 | -88.019 | 22.566 | 1.00 | 103.23 |
| C    |      |     |     |   |     |        |         |        |      |        |
| ATOM | 2285 | O   | TYR | X | 142 | 29.576 | -88.420 | 22.506 | 1.00 | 111.20 |
| O    |      |     |     |   |     |        |         |        |      |        |



|      |      |     |     |   |     |        |         |        |      |        |
|------|------|-----|-----|---|-----|--------|---------|--------|------|--------|
| ATOM | 2286 | CB  | TYR | X | 142 | 28.598 | -86.513 | 24.503 | 1.00 | 92.01  |
| C    |      |     |     |   |     |        |         |        |      |        |
| ATOM | 2287 | CG  | TYR | X | 142 | 28.001 | -87.513 | 25.510 | 1.00 | 86.94  |
| C    |      |     |     |   |     |        |         |        |      |        |
| ATOM | 2288 | CD1 | TYR | X | 142 | 28.583 | -88.748 | 25.716 | 1.00 | 86.80  |
| C    |      |     |     |   |     |        |         |        |      |        |
| ATOM | 2289 | CD2 | TYR | X | 142 | 27.026 | -87.109 | 26.407 | 1.00 | 86.13  |
| C    |      |     |     |   |     |        |         |        |      |        |
| ATOM | 2290 | CE1 | TYR | X | 142 | 28.108 | -89.619 | 26.675 | 1.00 | 87.21  |
| C    |      |     |     |   |     |        |         |        |      |        |
| ATOM | 2291 | CE2 | TYR | X | 142 | 26.560 | -87.948 | 27.392 | 1.00 | 86.53  |
| C    |      |     |     |   |     |        |         |        |      |        |
| ATOM | 2292 | CZ  | TYR | X | 142 | 27.101 | -89.211 | 27.525 | 1.00 | 89.26  |
| C    |      |     |     |   |     |        |         |        |      |        |
| ATOM | 2293 | OH  | TYR | X | 142 | 26.592 | -90.079 | 28.489 | 1.00 | 95.96  |
| O    |      |     |     |   |     |        |         |        |      |        |
| ATOM | 2294 | N   | ALA | X | 143 | 27.365 | -88.783 | 22.298 | 1.00 | 108.57 |
| N    |      |     |     |   |     |        |         |        |      |        |
| ATOM | 2295 | CA  | ALA | X | 143 | 27.535 | -90.135 | 21.815 | 1.00 | 116.73 |
| C    |      |     |     |   |     |        |         |        |      |        |
| ATOM | 2296 | C   | ALA | X | 143 | 26.347 | -90.441 | 20.953 | 1.00 | 113.83 |
| C    |      |     |     |   |     |        |         |        |      |        |
| ATOM | 2297 | O   | ALA | X | 143 | 25.271 | -89.929 | 21.203 | 1.00 | 119.75 |
| O    |      |     |     |   |     |        |         |        |      |        |
| ATOM | 2298 | CB  | ALA | X | 143 | 27.611 | -91.098 | 22.968 | 1.00 | 118.34 |
| C    |      |     |     |   |     |        |         |        |      |        |
| ATOM | 2299 | N   | TYR | X | 144 | 26.528 | -91.261 | 19.931 | 1.00 | 103.65 |
| N    |      |     |     |   |     |        |         |        |      |        |
| ATOM | 2300 | CA  | TYR | X | 144 | 25.417 | -91.581 | 19.069 | 1.00 | 97.51  |
| C    |      |     |     |   |     |        |         |        |      |        |
| ATOM | 2301 | C   | TYR | X | 144 | 25.661 | -92.854 | 18.307 | 1.00 | 96.60  |
| C    |      |     |     |   |     |        |         |        |      |        |
| ATOM | 2302 | O   | TYR | X | 144 | 26.792 | -93.170 | 17.985 | 1.00 | 95.33  |
| O    |      |     |     |   |     |        |         |        |      |        |
| ATOM | 2303 | CB  | TYR | X | 144 | 25.230 | -90.401 | 18.142 | 1.00 | 97.25  |
| C    |      |     |     |   |     |        |         |        |      |        |
| ATOM | 2304 | CG  | TYR | X | 144 | 24.493 | -90.645 | 16.863 | 1.00 | 101.71 |
| C    |      |     |     |   |     |        |         |        |      |        |
| ATOM | 2305 | CD1 | TYR | X | 144 | 23.397 | -91.468 | 16.810 | 1.00 | 107.14 |
| C    |      |     |     |   |     |        |         |        |      |        |
| ATOM | 2306 | CD2 | TYR | X | 144 | 24.863 | -89.986 | 15.715 | 1.00 | 100.39 |
| C    |      |     |     |   |     |        |         |        |      |        |
| ATOM | 2307 | CE1 | TYR | X | 144 | 22.712 | -91.659 | 15.633 | 1.00 | 109.24 |
| C    |      |     |     |   |     |        |         |        |      |        |
| ATOM | 2308 | CE2 | TYR | X | 144 | 24.189 | -90.170 | 14.538 | 1.00 | 106.87 |
| C    |      |     |     |   |     |        |         |        |      |        |
| ATOM | 2309 | CZ  | TYR | X | 144 | 23.114 | -91.008 | 14.504 | 1.00 | 110.85 |
| C    |      |     |     |   |     |        |         |        |      |        |
| ATOM | 2310 | OH  | TYR | X | 144 | 22.449 | -91.194 | 13.320 | 1.00 | 121.58 |
| O    |      |     |     |   |     |        |         |        |      |        |
| ATOM | 2311 | N   | ARG | X | 145 | 24.598 | -93.589 | 18.025 | 1.00 | 96.47  |
| N    |      |     |     |   |     |        |         |        |      |        |
| ATOM | 2312 | CA  | ARG | X | 145 | 24.706 | -94.810 | 17.263 | 1.00 | 101.00 |
| C    |      |     |     |   |     |        |         |        |      |        |

|      |      |     |     |   |     |        |          |        |            |
|------|------|-----|-----|---|-----|--------|----------|--------|------------|
| ATOM | 2313 | C   | ARG | X | 145 | 23.415 | -94.963  | 16.521 | 1.00100.62 |
| C    |      |     |     |   |     |        |          |        |            |
| ATOM | 2314 | O   | ARG | X | 145 | 22.372 | -94.662  | 17.061 | 1.00 93.74 |
| O    |      |     |     |   |     |        |          |        |            |
| ATOM | 2315 | CB  | ARG | X | 145 | 24.915 | -95.986  | 18.178 | 1.00110.60 |
| C    |      |     |     |   |     |        |          |        |            |
| ATOM | 2316 | CG  | ARG | X | 145 | 25.969 | -96.936  | 17.676 | 1.00127.82 |
| C    |      |     |     |   |     |        |          |        |            |
| ATOM | 2317 | CD  | ARG | X | 145 | 25.341 | -98.155  | 17.055 | 1.00138.87 |
| C    |      |     |     |   |     |        |          |        |            |
| ATOM | 2318 | NE  | ARG | X | 145 | 24.946 | -99.103  | 18.081 | 1.00150.28 |
| N    |      |     |     |   |     |        |          |        |            |
| ATOM | 2319 | CZ  | ARG | X | 145 | 25.802 | -99.688  | 18.903 | 1.00145.62 |
| C    |      |     |     |   |     |        |          |        |            |
| ATOM | 2320 | NH1 | ARG | X | 145 | 25.366 | -100.545 | 19.811 | 1.00135.85 |
| N    |      |     |     |   |     |        |          |        |            |
| ATOM | 2321 | NH2 | ARG | X | 145 | 27.095 | -99.406  | 18.821 | 1.00143.91 |
| N1+  |      |     |     |   |     |        |          |        |            |
| ATOM | 2322 | N   | GLU | X | 146 | 23.478 | -95.447  | 15.290 | 1.00103.08 |
| N    |      |     |     |   |     |        |          |        |            |
| ATOM | 2323 | CA  | GLU | X | 146 | 22.284 | -95.618  | 14.459 | 1.00 96.29 |
| C    |      |     |     |   |     |        |          |        |            |
| ATOM | 2324 | C   | GLU | X | 146 | 22.232 | -97.050  | 13.951 | 1.00 97.08 |
| C    |      |     |     |   |     |        |          |        |            |
| ATOM | 2325 | O   | GLU | X | 146 | 22.837 | -97.342  | 12.958 | 1.00106.90 |
| O    |      |     |     |   |     |        |          |        |            |
| ATOM | 2326 | CB  | GLU | X | 146 | 22.299 | -94.637  | 13.240 | 1.00 0.00  |
| C    |      |     |     |   |     |        |          |        |            |
| ATOM | 2327 | CG  | GLU | X | 146 | 22.049 | -93.177  | 13.637 | 1.00 0.00  |
| C    |      |     |     |   |     |        |          |        |            |
| ATOM | 2328 | CD  | GLU | X | 146 | 21.811 | -92.292  | 12.411 | 1.00 0.00  |
| C    |      |     |     |   |     |        |          |        |            |
| ATOM | 2329 | OE1 | GLU | X | 146 | 22.604 | -92.194  | 11.476 | 1.00 0.00  |
| O    |      |     |     |   |     |        |          |        |            |
| ATOM | 2330 | OE2 | GLU | X | 146 | 20.626 | -91.616  | 12.443 | 1.00 0.00  |
| O1-  |      |     |     |   |     |        |          |        |            |
| ATOM | 2331 | N   | GLU | X | 147 | 21.469 | -97.909  | 14.619 | 1.00100.87 |
| N    |      |     |     |   |     |        |          |        |            |
| ATOM | 2332 | CA  | GLU | X | 147 | 21.327 | -99.265  | 14.181 | 1.00115.15 |
| C    |      |     |     |   |     |        |          |        |            |
| ATOM | 2333 | C   | GLU | X | 147 | 20.046 | -99.509  | 13.412 | 1.00122.28 |
| C    |      |     |     |   |     |        |          |        |            |
| ATOM | 2334 | O   | GLU | X | 147 | 18.925 | -99.082  | 13.778 | 1.00143.83 |
| O    |      |     |     |   |     |        |          |        |            |
| ATOM | 2335 | CB  | GLU | X | 147 | 21.618 | -100.276 | 15.285 | 1.00129.01 |
| C    |      |     |     |   |     |        |          |        |            |
| ATOM | 2336 | CG  | GLU | X | 147 | 20.550 | -100.559 | 16.327 | 1.00134.03 |
| C    |      |     |     |   |     |        |          |        |            |
| ATOM | 2337 | CD  | GLU | X | 147 | 20.988 | -101.677 | 17.286 | 1.00137.60 |
| C    |      |     |     |   |     |        |          |        |            |
| ATOM | 2338 | OE1 | GLU | X | 147 | 21.905 | -101.402 | 18.134 | 1.00121.40 |
| O    |      |     |     |   |     |        |          |        |            |
| ATOM | 2339 | OE2 | GLU | X | 147 | 20.514 | -102.846 | 17.095 | 1.00131.36 |
| O1-  |      |     |     |   |     |        |          |        |            |

|      |      |     |     |   |     |                |        |            |
|------|------|-----|-----|---|-----|----------------|--------|------------|
| ATOM | 2340 | N   | GLN | X | 148 | 20.214-100.231 | 12.317 | 1.00121.49 |
| N    |      |     |     |   |     |                |        |            |
| ATOM | 2341 | CA  | GLN | X | 148 | 19.051-100.897 | 11.664 | 1.00129.53 |
| C    |      |     |     |   |     |                |        |            |
| ATOM | 2342 | C   | GLN | X | 148 | 19.228-102.408 | 11.584 | 1.00126.55 |
| C    |      |     |     |   |     |                |        |            |
| ATOM | 2343 | O   | GLN | X | 148 | 18.966-103.014 | 10.553 | 1.00128.62 |
| O    |      |     |     |   |     |                |        |            |
| ATOM | 2344 | CB  | GLN | X | 148 | 18.715-100.279 | 10.289 | 1.00141.98 |
| C    |      |     |     |   |     |                |        |            |
| ATOM | 2345 | CG  | GLN | X | 148 | 19.901 -99.910 | 9.386  | 1.00147.17 |
| C    |      |     |     |   |     |                |        |            |
| ATOM | 2346 | CD  | GLN | X | 148 | 19.707 -98.571 | 8.681  | 1.00149.90 |
| C    |      |     |     |   |     |                |        |            |
| ATOM | 2347 | NE2 | GLN | X | 148 | 18.781 -98.412 | 7.900  | 1.00151.82 |
| N    |      |     |     |   |     |                |        |            |
| ATOM | 2348 | OE1 | GLN | X | 148 | 20.565 -97.596 | 8.985  | 1.00156.36 |
| O    |      |     |     |   |     |                |        |            |
| ATOM | 2349 | N   | ASP | X | 149 | 19.495-103.027 | 12.719 | 1.00128.19 |
| N    |      |     |     |   |     |                |        |            |
| ATOM | 2350 | CA  | ASP | X | 149 | 19.769-104.460 | 12.767 | 1.00143.54 |
| C    |      |     |     |   |     |                |        |            |
| ATOM | 2351 | C   | ASP | X | 149 | 18.511-105.307 | 12.835 | 1.00147.05 |
| C    |      |     |     |   |     |                |        |            |
| ATOM | 2352 | O   | ASP | X | 149 | 18.176-106.034 | 11.901 | 1.00147.05 |
| O    |      |     |     |   |     |                |        |            |
| ATOM | 2353 | CB  | ASP | X | 149 | 20.665-104.780 | 13.955 | 1.00148.69 |
| C    |      |     |     |   |     |                |        |            |
| ATOM | 2354 | CG  | ASP | X | 149 | 22.035-104.236 | 13.780 | 1.00147.42 |
| C    |      |     |     |   |     |                |        |            |
| ATOM | 2355 | OD1 | ASP | X | 149 | 22.164-103.193 | 13.057 | 1.00141.58 |
| O    |      |     |     |   |     |                |        |            |
| ATOM | 2356 | OD2 | ASP | X | 149 | 22.976-104.882 | 14.312 | 1.00142.79 |
| O1-  |      |     |     |   |     |                |        |            |
| ATOM | 2357 | N   | PHE | X | 150 | 17.745-105.134 | 13.916 | 1.00149.29 |
| N    |      |     |     |   |     |                |        |            |
| ATOM | 2358 | CA  | PHE | X | 150 | 16.429-105.753 | 14.065 | 1.00135.22 |
| C    |      |     |     |   |     |                |        |            |
| ATOM | 2359 | C   | PHE | X | 150 | 15.527-105.451 | 12.865 | 1.00121.59 |
| C    |      |     |     |   |     |                |        |            |
| ATOM | 2360 | O   | PHE | X | 150 | 14.666-106.264 | 12.546 | 1.00122.85 |
| O    |      |     |     |   |     |                |        |            |
| ATOM | 2361 | CB  | PHE | X | 150 | 15.782-105.257 | 15.365 | 1.00133.92 |
| C    |      |     |     |   |     |                |        |            |
| ATOM | 2362 | CG  | PHE | X | 150 | 16.611-105.562 | 16.595 | 1.00143.38 |
| C    |      |     |     |   |     |                |        |            |
| ATOM | 2363 | CD1 | PHE | X | 150 | 16.535-106.833 | 17.194 | 1.00144.94 |
| C    |      |     |     |   |     |                |        |            |
| ATOM | 2364 | CD2 | PHE | X | 150 | 17.501-104.598 | 17.108 | 1.00148.37 |
| C    |      |     |     |   |     |                |        |            |
| ATOM | 2365 | CE1 | PHE | X | 150 | 17.350-107.145 | 18.297 | 1.00147.92 |
| C    |      |     |     |   |     |                |        |            |
| ATOM | 2366 | CE2 | PHE | X | 150 | 18.310-104.908 | 18.212 | 1.00149.58 |
| C    |      |     |     |   |     |                |        |            |

|             |      |     |           |                |        |            |
|-------------|------|-----|-----------|----------------|--------|------------|
| ATOM<br>C   | 2367 | CZ  | PHE X 150 | 18.237-106.179 | 18.806 | 1.00148.12 |
| ATOM<br>N   | 2368 | N   | GLY X 151 | 15.777-104.334 | 12.169 | 1.00111.62 |
| ATOM<br>C   | 2369 | CA  | GLY X 151 | 15.028-103.959 | 10.984 | 1.00115.85 |
| ATOM<br>C   | 2370 | C   | GLY X 151 | 13.780-103.123 | 11.327 | 1.00116.92 |
| ATOM<br>O   | 2371 | O   | GLY X 151 | 12.707-103.196 | 10.752 | 1.00115.00 |
| ATOM<br>N   | 2372 | N   | ILE X 152 | 13.918-102.254 | 12.294 | 1.00119.88 |
| ATOM<br>C   | 2373 | CA  | ILE X 152 | 13.446-100.880 | 12.173 | 1.00117.40 |
| ATOM<br>C   | 2374 | C   | ILE X 152 | 14.726-100.114 | 12.536 | 1.00106.02 |
| ATOM<br>O   | 2375 | O   | ILE X 152 | 15.589-100.619 | 13.264 | 1.00103.47 |
| ATOM<br>C   | 2376 | CB  | ILE X 152 | 12.257-100.564 | 13.109 | 1.00124.44 |
| ATOM<br>C   | 2377 | CG1 | ILE X 152 | 12.302 -99.061 | 13.456 | 1.00128.29 |
| ATOM<br>C   | 2378 | CG2 | ILE X 152 | 12.222-101.441 | 14.382 | 1.00125.36 |
| ATOM<br>C   | 2379 | CD1 | ILE X 152 | 11.078 -98.584 | 14.244 | 1.00131.55 |
| ATOM<br>N   | 2380 | N   | GLU X 153 | 14.890 -98.923 | 11.981 | 1.00 99.32 |
| ATOM<br>C   | 2381 | CA  | GLU X 153 | 16.074 -98.077 | 12.292 | 1.00 97.85 |
| ATOM<br>C   | 2382 | C   | GLU X 153 | 15.831 -97.479 | 13.645 | 1.00 94.43 |
| ATOM<br>O   | 2383 | O   | GLU X 153 | 14.667 -97.190 | 14.009 | 1.00 89.94 |
| ATOM<br>C   | 2384 | CB  | GLU X 153 | 16.360 -96.968 | 11.262 | 1.00103.61 |
| ATOM<br>C   | 2385 | CG  | GLU X 153 | 15.147 -96.278 | 10.612 | 1.00108.82 |
| ATOM<br>C   | 2386 | CD  | GLU X 153 | 15.526 -95.121 | 9.666  | 1.00108.20 |
| ATOM<br>O   | 2387 | OE1 | GLU X 153 | 14.678 -94.188 | 9.504  | 1.00105.30 |
| ATOM<br>O1- | 2388 | OE2 | GLU X 153 | 16.647 -95.162 | 9.062  | 1.00102.47 |
| ATOM<br>N   | 2389 | N   | ILE X 154 | 16.860 -97.521 | 14.453 | 1.00 95.88 |
| ATOM<br>C   | 2390 | CA  | ILE X 154 | 16.741 -97.148 | 15.876 | 1.00 96.16 |
| ATOM<br>C   | 2391 | C   | ILE X 154 | 17.928 -96.233 | 16.101 | 1.00 95.00 |
| ATOM<br>O   | 2392 | O   | ILE X 154 | 19.004 -96.500 | 15.577 | 1.00 90.80 |
| ATOM<br>C   | 2393 | CB  | ILE X 154 | 16.838 -98.460 | 16.703 | 1.00 99.33 |

|      |      |     |     |   |     |        |         |        |            |
|------|------|-----|-----|---|-----|--------|---------|--------|------------|
| ATOM | 2394 | CG1 | ILE | X | 154 | 15.448 | -99.082 | 16.933 | 1.00102.62 |
| C    |      |     |     |   |     |        |         |        |            |
| ATOM | 2395 | CG2 | ILE | X | 154 | 17.626 | -98.284 | 17.984 | 1.00103.06 |
| C    |      |     |     |   |     |        |         |        |            |
| ATOM | 2396 | CD1 | ILE | X | 154 | 14.551 | -98.333 | 17.926 | 1.00103.68 |
| C    |      |     |     |   |     |        |         |        |            |
| ATOM | 2397 | N   | VAL | X | 155 | 17.728 | -95.129 | 16.825 | 1.00 95.82 |
| N    |      |     |     |   |     |        |         |        |            |
| ATOM | 2398 | CA  | VAL | X | 155 | 18.810 | -94.250 | 17.149 | 1.00 94.26 |
| C    |      |     |     |   |     |        |         |        |            |
| ATOM | 2399 | C   | VAL | X | 155 | 18.910 | -94.119 | 18.664 | 1.00 95.18 |
| C    |      |     |     |   |     |        |         |        |            |
| ATOM | 2400 | O   | VAL | X | 155 | 17.945 | -93.729 | 19.340 | 1.00102.73 |
| O    |      |     |     |   |     |        |         |        |            |
| ATOM | 2401 | CB  | VAL | X | 155 | 18.653 | -92.864 | 16.512 | 1.00 95.33 |
| C    |      |     |     |   |     |        |         |        |            |
| ATOM | 2402 | CG1 | VAL | X | 155 | 19.899 | -92.075 | 16.754 | 1.00 98.17 |
| C    |      |     |     |   |     |        |         |        |            |
| ATOM | 2403 | CG2 | VAL | X | 155 | 18.414 | -92.947 | 15.018 | 1.00 97.62 |
| C    |      |     |     |   |     |        |         |        |            |
| ATOM | 2404 | N   | LYS | X | 156 | 20.077 | -94.504 | 19.192 | 1.00 91.35 |
| N    |      |     |     |   |     |        |         |        |            |
| ATOM | 2405 | CA  | LYS | X | 156 | 20.359 | -94.369 | 20.600 | 1.00 88.34 |
| C    |      |     |     |   |     |        |         |        |            |
| ATOM | 2406 | C   | LYS | X | 156 | 21.395 | -93.251 | 20.771 | 1.00 86.95 |
| C    |      |     |     |   |     |        |         |        |            |
| ATOM | 2407 | O   | LYS | X | 156 | 22.405 | -93.213 | 20.073 | 1.00 90.57 |
| O    |      |     |     |   |     |        |         |        |            |
| ATOM | 2408 | CB  | LYS | X | 156 | 20.884 | -95.648 | 21.228 | 1.00 85.42 |
| C    |      |     |     |   |     |        |         |        |            |
| ATOM | 2409 | CG  | LYS | X | 156 | 20.435 | -96.916 | 20.593 | 1.00 85.48 |
| C    |      |     |     |   |     |        |         |        |            |
| ATOM | 2410 | CD  | LYS | X | 156 | 21.478 | -97.982 | 20.839 | 1.00 89.45 |
| C    |      |     |     |   |     |        |         |        |            |
| ATOM | 2411 | CE  | LYS | X | 156 | 20.917 | -99.391 | 20.642 | 1.00 96.00 |
| C    |      |     |     |   |     |        |         |        |            |
| ATOM | 2412 | NZ  | LYS | X | 156 | 20.326 | -99.978 | 21.884 | 1.00101.80 |
| N1+  |      |     |     |   |     |        |         |        |            |
| ATOM | 2413 | N   | VAL | X | 157 | 21.097 | -92.315 | 21.661 | 1.00 83.78 |
| N    |      |     |     |   |     |        |         |        |            |
| ATOM | 2414 | CA  | VAL | X | 157 | 22.004 | -91.240 | 21.946 | 1.00 84.22 |
| C    |      |     |     |   |     |        |         |        |            |
| ATOM | 2415 | C   | VAL | X | 157 | 22.187 | -91.013 | 23.444 | 1.00 86.01 |
| C    |      |     |     |   |     |        |         |        |            |
| ATOM | 2416 | O   | VAL | X | 157 | 21.347 | -91.371 | 24.264 | 1.00 79.97 |
| O    |      |     |     |   |     |        |         |        |            |
| ATOM | 2417 | CB  | VAL | X | 157 | 21.674 | -89.955 | 21.145 | 1.00 82.99 |
| C    |      |     |     |   |     |        |         |        |            |
| ATOM | 2418 | CG1 | VAL | X | 157 | 21.287 | -90.304 | 19.751 | 1.00 80.29 |
| C    |      |     |     |   |     |        |         |        |            |
| ATOM | 2419 | CG2 | VAL | X | 157 | 20.537 | -89.171 | 21.756 | 1.00 86.18 |
| C    |      |     |     |   |     |        |         |        |            |
| ATOM | 2420 | N   | LYS | X | 158 | 23.341 | -90.459 | 23.781 | 1.00 91.64 |
| N    |      |     |     |   |     |        |         |        |            |

|      |      |     |     |   |     |        |         |        |      |        |
|------|------|-----|-----|---|-----|--------|---------|--------|------|--------|
| ATOM | 2421 | CA  | LYS | X | 158 | 23.626 | -89.985 | 25.123 | 1.00 | 97.96  |
| C    |      |     |     |   |     |        |         |        |      |        |
| ATOM | 2422 | C   | LYS | X | 158 | 23.858 | -88.486 | 25.077 | 1.00 | 95.51  |
| C    |      |     |     |   |     |        |         |        |      |        |
| ATOM | 2423 | O   | LYS | X | 158 | 24.862 | -88.057 | 24.569 | 1.00 | 94.40  |
| O    |      |     |     |   |     |        |         |        |      |        |
| ATOM | 2424 | CB  | LYS | X | 158 | 24.877 | -90.677 | 25.643 | 1.00 | 101.70 |
| C    |      |     |     |   |     |        |         |        |      |        |
| ATOM | 2425 | CG  | LYS | X | 158 | 24.810 | -92.170 | 25.619 | 1.00 | 99.15  |
| C    |      |     |     |   |     |        |         |        |      |        |
| ATOM | 2426 | CD  | LYS | X | 158 | 26.084 | -92.745 | 26.174 | 1.00 | 101.25 |
| C    |      |     |     |   |     |        |         |        |      |        |
| ATOM | 2427 | CE  | LYS | X | 158 | 26.030 | -94.240 | 25.992 | 1.00 | 112.54 |
| C    |      |     |     |   |     |        |         |        |      |        |
| ATOM | 2428 | NZ  | LYS | X | 158 | 27.052 | -94.975 | 26.758 | 1.00 | 128.86 |
| N1+  |      |     |     |   |     |        |         |        |      |        |
| ATOM | 2429 | N   | ALA | X | 159 | 22.919 | -87.714 | 25.613 | 1.00 | 89.45  |
| N    |      |     |     |   |     |        |         |        |      |        |
| ATOM | 2430 | CA  | ALA | X | 159 | 23.079 | -86.274 | 25.726 | 1.00 | 90.16  |
| C    |      |     |     |   |     |        |         |        |      |        |
| ATOM | 2431 | C   | ALA | X | 159 | 23.387 | -85.833 | 27.144 | 1.00 | 93.60  |
| C    |      |     |     |   |     |        |         |        |      |        |
| ATOM | 2432 | O   | ALA | X | 159 | 23.151 | -86.560 | 28.078 | 1.00 | 92.93  |
| O    |      |     |     |   |     |        |         |        |      |        |
| ATOM | 2433 | CB  | ALA | X | 159 | 21.837 | -85.586 | 25.243 | 1.00 | 90.70  |
| C    |      |     |     |   |     |        |         |        |      |        |
| ATOM | 2434 | N   | ILE | X | 160 | 23.911 | -84.626 | 27.288 | 1.00 | 94.93  |
| N    |      |     |     |   |     |        |         |        |      |        |
| ATOM | 2435 | CA  | ILE | X | 160 | 24.209 | -84.048 | 28.586 | 1.00 | 97.32  |
| C    |      |     |     |   |     |        |         |        |      |        |
| ATOM | 2436 | C   | ILE | X | 160 | 23.634 | -82.637 | 28.643 | 1.00 | 98.05  |
| C    |      |     |     |   |     |        |         |        |      |        |
| ATOM | 2437 | O   | ILE | X | 160 | 23.826 | -81.857 | 27.727 | 1.00 | 101.81 |
| O    |      |     |     |   |     |        |         |        |      |        |
| ATOM | 2438 | CB  | ILE | X | 160 | 25.735 | -84.027 | 28.797 | 1.00 | 101.95 |
| C    |      |     |     |   |     |        |         |        |      |        |
| ATOM | 2439 | CG1 | ILE | X | 160 | 26.094 | -83.663 | 30.227 | 1.00 | 117.15 |
| C    |      |     |     |   |     |        |         |        |      |        |
| ATOM | 2440 | CG2 | ILE | X | 160 | 26.412 | -83.071 | 27.846 | 1.00 | 101.06 |
| C    |      |     |     |   |     |        |         |        |      |        |
| ATOM | 2441 | CD1 | ILE | X | 160 | 27.271 | -84.473 | 30.764 | 1.00 | 131.74 |
| C    |      |     |     |   |     |        |         |        |      |        |
| ATOM | 2442 | N   | GLY | X | 161 | 22.877 | -82.335 | 29.690 | 1.00 | 99.22  |
| N    |      |     |     |   |     |        |         |        |      |        |
| ATOM | 2443 | CA  | GLY | X | 161 | 22.290 | -81.005 | 29.847 | 1.00 | 103.84 |
| C    |      |     |     |   |     |        |         |        |      |        |
| ATOM | 2444 | C   | GLY | X | 161 | 23.334 | -79.894 | 29.944 | 1.00 | 101.55 |
| C    |      |     |     |   |     |        |         |        |      |        |
| ATOM | 2445 | O   | GLY | X | 161 | 24.318 | -80.006 | 30.708 | 1.00 | 119.09 |
| O    |      |     |     |   |     |        |         |        |      |        |
| ATOM | 2446 | N   | ARG | X | 162 | 23.118 | -78.818 | 29.183 | 1.00 | 90.84  |
| N    |      |     |     |   |     |        |         |        |      |        |
| ATOM | 2447 | CA  | ARG | X | 162 | 24.097 | -77.751 | 29.097 | 1.00 | 92.74  |
| C    |      |     |     |   |     |        |         |        |      |        |

|      |      |     |     |   |     |        |         |        |      |        |
|------|------|-----|-----|---|-----|--------|---------|--------|------|--------|
| ATOM | 2448 | C   | ARG | X | 162 | 23.618 | -76.420 | 29.666 | 1.00 | 97.85  |
| C    |      |     |     |   |     |        |         |        |      |        |
| ATOM | 2449 | O   | ARG | X | 162 | 24.200 | -75.914 | 30.611 | 1.00 | 121.77 |
| O    |      |     |     |   |     |        |         |        |      |        |
| ATOM | 2450 | CB  | ARG | X | 162 | 24.580 | -77.500 | 27.676 | 1.00 | 94.08  |
| C    |      |     |     |   |     |        |         |        |      |        |
| ATOM | 2451 | CG  | ARG | X | 162 | 25.517 | -78.557 | 27.109 | 1.00 | 98.03  |
| C    |      |     |     |   |     |        |         |        |      |        |
| ATOM | 2452 | CD  | ARG | X | 162 | 26.960 | -78.463 | 27.578 | 1.00 | 104.34 |
| C    |      |     |     |   |     |        |         |        |      |        |
| ATOM | 2453 | NE  | ARG | X | 162 | 27.305 | -79.569 | 28.494 | 1.00 | 112.76 |
| N    |      |     |     |   |     |        |         |        |      |        |
| ATOM | 2454 | CZ  | ARG | X | 162 | 28.407 | -80.331 | 28.419 | 1.00 | 117.59 |
| C    |      |     |     |   |     |        |         |        |      |        |
| ATOM | 2455 | NH1 | ARG | X | 162 | 29.318 | -80.148 | 27.459 | 1.00 | 119.51 |
| N    |      |     |     |   |     |        |         |        |      |        |
| ATOM | 2456 | NH2 | ARG | X | 162 | 28.602 | -81.283 | 29.328 | 1.00 | 113.84 |
| N1+  |      |     |     |   |     |        |         |        |      |        |
| ATOM | 2457 | N   | GLN | X | 163 | 22.599 | -75.828 | 29.074 | 1.00 | 97.99  |
| N    |      |     |     |   |     |        |         |        |      |        |
| ATOM | 2458 | CA  | GLN | X | 163 | 22.182 | -74.471 | 29.484 | 1.00 | 98.10  |
| C    |      |     |     |   |     |        |         |        |      |        |
| ATOM | 2459 | C   | GLN | X | 163 | 20.704 | -74.342 | 29.776 | 1.00 | 89.82  |
| C    |      |     |     |   |     |        |         |        |      |        |
| ATOM | 2460 | O   | GLN | X | 163 | 19.858 | -74.987 | 29.165 | 1.00 | 82.86  |
| O    |      |     |     |   |     |        |         |        |      |        |
| ATOM | 2461 | CB  | GLN | X | 163 | 22.579 | -73.483 | 28.434 | 1.00 | 103.44 |
| C    |      |     |     |   |     |        |         |        |      |        |
| ATOM | 2462 | CG  | GLN | X | 163 | 23.934 | -73.800 | 27.868 | 1.00 | 106.34 |
| C    |      |     |     |   |     |        |         |        |      |        |
| ATOM | 2463 | CD  | GLN | X | 163 | 24.459 | -72.641 | 27.117 | 1.00 | 110.22 |
| C    |      |     |     |   |     |        |         |        |      |        |
| ATOM | 2464 | OE1 | GLN | X | 163 | 23.748 | -72.082 | 26.305 | 1.00 | 117.32 |
| O    |      |     |     |   |     |        |         |        |      |        |
| ATOM | 2465 | NE2 | GLN | X | 163 | 25.658 | -72.191 | 27.457 | 1.00 | 112.10 |
| N    |      |     |     |   |     |        |         |        |      |        |
| ATOM | 2466 | N   | ARG | X | 164 | 20.378 | -73.433 | 30.661 | 1.00 | 88.96  |
| N    |      |     |     |   |     |        |         |        |      |        |
| ATOM | 2467 | CA  | ARG | X | 164 | 18.985 | -73.105 | 30.923 | 1.00 | 87.51  |
| C    |      |     |     |   |     |        |         |        |      |        |
| ATOM | 2468 | C   | ARG | X | 164 | 18.521 | -71.982 | 30.009 | 1.00 | 83.33  |
| C    |      |     |     |   |     |        |         |        |      |        |
| ATOM | 2469 | O   | ARG | X | 164 | 19.227 | -71.005 | 29.799 | 1.00 | 89.49  |
| O    |      |     |     |   |     |        |         |        |      |        |
| ATOM | 2470 | CB  | ARG | X | 164 | 18.799 | -72.734 | 32.377 | 1.00 | 93.15  |
| C    |      |     |     |   |     |        |         |        |      |        |
| ATOM | 2471 | CG  | ARG | X | 164 | 19.282 | -73.795 | 33.356 | 1.00 | 93.72  |
| C    |      |     |     |   |     |        |         |        |      |        |
| ATOM | 2472 | CD  | ARG | X | 164 | 19.085 | -73.329 | 34.790 | 1.00 | 96.38  |
| C    |      |     |     |   |     |        |         |        |      |        |
| ATOM | 2473 | NE  | ARG | X | 164 | 20.152 | -72.439 | 35.220 | 1.00 | 95.17  |
| N    |      |     |     |   |     |        |         |        |      |        |
| ATOM | 2474 | CZ  | ARG | X | 164 | 20.131 | -71.109 | 35.129 | 1.00 | 93.23  |
| C    |      |     |     |   |     |        |         |        |      |        |

|      |      |     |     |   |     |        |         |        |      |        |
|------|------|-----|-----|---|-----|--------|---------|--------|------|--------|
| ATOM | 2475 | NH1 | ARG | X | 164 | 19.111 | -70.446 | 34.618 | 1.00 | 89.67  |
| N    |      |     |     |   |     |        |         |        |      |        |
| ATOM | 2476 | NH2 | ARG | X | 164 | 21.169 | -70.437 | 35.547 | 1.00 | 98.60  |
| N1+  |      |     |     |   |     |        |         |        |      |        |
| ATOM | 2477 | N   | PHE | X | 165 | 17.293 | -72.106 | 29.544 | 1.00 | 81.47  |
| N    |      |     |     |   |     |        |         |        |      |        |
| ATOM | 2478 | CA  | PHE | X | 165 | 16.691 | -71.063 | 28.757 | 1.00 | 89.13  |
| C    |      |     |     |   |     |        |         |        |      |        |
| ATOM | 2479 | C   | PHE | X | 165 | 15.261 | -70.730 | 29.139 | 1.00 | 88.92  |
| C    |      |     |     |   |     |        |         |        |      |        |
| ATOM | 2480 | O   | PHE | X | 165 | 14.570 | -71.540 | 29.754 | 1.00 | 87.31  |
| O    |      |     |     |   |     |        |         |        |      |        |
| ATOM | 2481 | CB  | PHE | X | 165 | 16.752 | -71.379 | 27.255 | 1.00 | 100.46 |
| C    |      |     |     |   |     |        |         |        |      |        |
| ATOM | 2482 | CG  | PHE | X | 165 | 16.147 | -72.749 | 26.866 | 1.00 | 107.10 |
| C    |      |     |     |   |     |        |         |        |      |        |
| ATOM | 2483 | CD1 | PHE | X | 165 | 14.762 | -72.918 | 26.708 | 1.00 | 104.07 |
| C    |      |     |     |   |     |        |         |        |      |        |
| ATOM | 2484 | CD2 | PHE | X | 165 | 16.980 | -73.849 | 26.593 | 1.00 | 106.17 |
| C    |      |     |     |   |     |        |         |        |      |        |
| ATOM | 2485 | CE1 | PHE | X | 165 | 14.242 | -74.150 | 26.368 | 1.00 | 96.22  |
| C    |      |     |     |   |     |        |         |        |      |        |
| ATOM | 2486 | CE2 | PHE | X | 165 | 16.449 | -75.084 | 26.274 | 1.00 | 95.24  |
| C    |      |     |     |   |     |        |         |        |      |        |
| ATOM | 2487 | CZ  | PHE | X | 165 | 15.084 | -75.239 | 26.210 | 1.00 | 93.89  |
| C    |      |     |     |   |     |        |         |        |      |        |
| ATOM | 2488 | N   | LYS | X | 166 | 14.827 | -69.567 | 28.661 | 1.00 | 90.40  |
| N    |      |     |     |   |     |        |         |        |      |        |
| ATOM | 2489 | CA  | LYS | X | 166 | 13.449 | -69.118 | 28.721 | 1.00 | 95.97  |
| C    |      |     |     |   |     |        |         |        |      |        |
| ATOM | 2490 | C   | LYS | X | 166 | 12.841 | -69.291 | 27.344 | 1.00 | 95.72  |
| C    |      |     |     |   |     |        |         |        |      |        |
| ATOM | 2491 | O   | LYS | X | 166 | 13.437 | -68.940 | 26.325 | 1.00 | 91.23  |
| O    |      |     |     |   |     |        |         |        |      |        |
| ATOM | 2492 | CB  | LYS | X | 166 | 13.415 | -67.645 | 29.073 | 1.00 | 113.30 |
| C    |      |     |     |   |     |        |         |        |      |        |
| ATOM | 2493 | CG  | LYS | X | 166 | 12.232 | -67.177 | 29.942 | 1.00 | 131.85 |
| C    |      |     |     |   |     |        |         |        |      |        |
| ATOM | 2494 | CD  | LYS | X | 166 | 12.541 | -65.821 | 30.634 | 1.00 | 143.69 |
| C    |      |     |     |   |     |        |         |        |      |        |
| ATOM | 2495 | CE  | LYS | X | 166 | 11.392 | -65.308 | 31.505 | 1.00 | 141.96 |
| C    |      |     |     |   |     |        |         |        |      |        |
| ATOM | 2496 | NZ  | LYS | X | 166 | 10.114 | -65.179 | 30.725 | 1.00 | 138.07 |
| N1+  |      |     |     |   |     |        |         |        |      |        |
| ATOM | 2497 | N   | VAL | X | 167 | 11.634 | -69.838 | 27.316 | 1.00 | 103.71 |
| N    |      |     |     |   |     |        |         |        |      |        |
| ATOM | 2498 | CA  | VAL | X | 167 | 10.865 | -69.963 | 26.075 | 1.00 | 114.05 |
| C    |      |     |     |   |     |        |         |        |      |        |
| ATOM | 2499 | C   | VAL | X | 167 | 10.274 | -68.614 | 25.708 | 1.00 | 116.12 |
| C    |      |     |     |   |     |        |         |        |      |        |
| ATOM | 2500 | O   | VAL | X | 167 | 9.653  | -67.957 | 26.511 | 1.00 | 132.95 |
| O    |      |     |     |   |     |        |         |        |      |        |
| ATOM | 2501 | CB  | VAL | X | 167 | 9.732  | -70.969 | 26.214 | 1.00 | 119.92 |
| C    |      |     |     |   |     |        |         |        |      |        |



|      |      |     |     |   |     |        |         |        |            |
|------|------|-----|-----|---|-----|--------|---------|--------|------------|
| ATOM | 2502 | CG1 | VAL | X | 167 | 8.740  | -70.823 | 25.058 | 1.00116.24 |
| C    |      |     |     |   |     |        |         |        |            |
| ATOM | 2503 | CG2 | VAL | X | 167 | 10.329 | -72.373 | 26.309 | 1.00126.07 |
| C    |      |     |     |   |     |        |         |        |            |
| ATOM | 2504 | N   | LEU | X | 168 | 10.472 | -68.222 | 24.472 | 1.00106.55 |
| N    |      |     |     |   |     |        |         |        |            |
| ATOM | 2505 | CA  | LEU | X | 168 | 9.824  | -67.034 | 23.920 | 1.00103.95 |
| C    |      |     |     |   |     |        |         |        |            |
| ATOM | 2506 | C   | LEU | X | 168 | 8.619  | -67.450 | 23.072 | 1.00108.79 |
| C    |      |     |     |   |     |        |         |        |            |
| ATOM | 2507 | O   | LEU | X | 168 | 7.457  | -67.261 | 23.465 | 1.00110.08 |
| O    |      |     |     |   |     |        |         |        |            |
| ATOM | 2508 | CB  | LEU | X | 168 | 10.857 | -66.365 | 23.073 | 1.00101.54 |
| C    |      |     |     |   |     |        |         |        |            |
| ATOM | 2509 | CG  | LEU | X | 168 | 12.096 | -66.243 | 23.954 | 1.00101.83 |
| C    |      |     |     |   |     |        |         |        |            |
| ATOM | 2510 | CD1 | LEU | X | 168 | 13.396 | -66.219 | 23.181 | 1.00101.37 |
| C    |      |     |     |   |     |        |         |        |            |
| ATOM | 2511 | CD2 | LEU | X | 168 | 11.959 | -64.991 | 24.787 | 1.00107.34 |
| C    |      |     |     |   |     |        |         |        |            |
| ATOM | 2512 | N   | GLU | X | 169 | 8.902  | -68.136 | 21.951 | 1.00111.57 |
| N    |      |     |     |   |     |        |         |        |            |
| ATOM | 2513 | CA  | GLU | X | 169 | 7.887  | -68.732 | 21.093 | 1.00116.25 |
| C    |      |     |     |   |     |        |         |        |            |
| ATOM | 2514 | C   | GLU | X | 169 | 8.133  | -70.225 | 20.795 | 1.00114.16 |
| C    |      |     |     |   |     |        |         |        |            |
| ATOM | 2515 | O   | GLU | X | 169 | 9.272  | -70.672 | 20.721 | 1.00108.13 |
| O    |      |     |     |   |     |        |         |        |            |
| ATOM | 2516 | CB  | GLU | X | 169 | 7.926  | -68.042 | 19.761 | 1.00122.15 |
| C    |      |     |     |   |     |        |         |        |            |
| ATOM | 2517 | CG  | GLU | X | 169 | 6.732  | -67.210 | 19.467 | 1.00132.40 |
| C    |      |     |     |   |     |        |         |        |            |
| ATOM | 2518 | CD  | GLU | X | 169 | 6.815  | -66.677 | 18.086 | 1.00143.59 |
| C    |      |     |     |   |     |        |         |        |            |
| ATOM | 2519 | OE1 | GLU | X | 169 | 7.843  | -66.966 | 17.411 | 1.00146.71 |
| O    |      |     |     |   |     |        |         |        |            |
| ATOM | 2520 | OE2 | GLU | X | 169 | 5.875  | -65.955 | 17.700 | 1.00156.64 |
| O1-  |      |     |     |   |     |        |         |        |            |
| ATOM | 2521 | N   | LEU | X | 170 | 7.066  | -70.903 | 20.418 | 1.00116.90 |
| N    |      |     |     |   |     |        |         |        |            |
| ATOM | 2522 | CA  | LEU | X | 170 | 7.124  | -72.276 | 19.911 | 1.00127.55 |
| C    |      |     |     |   |     |        |         |        |            |
| ATOM | 2523 | C   | LEU | X | 170 | 6.449  | -72.414 | 18.543 | 1.00147.01 |
| C    |      |     |     |   |     |        |         |        |            |
| ATOM | 2524 | O   | LEU | X | 170 | 5.204  | -72.360 | 18.434 | 1.00163.32 |
| O    |      |     |     |   |     |        |         |        |            |
| ATOM | 2525 | CB  | LEU | X | 170 | 6.387  | -73.172 | 20.883 | 1.00127.25 |
| C    |      |     |     |   |     |        |         |        |            |
| ATOM | 2526 | CG  | LEU | X | 170 | 7.183  | -73.697 | 22.051 | 1.00125.03 |
| C    |      |     |     |   |     |        |         |        |            |
| ATOM | 2527 | CD1 | LEU | X | 170 | 6.236  | -74.293 | 23.081 | 1.00125.56 |
| C    |      |     |     |   |     |        |         |        |            |
| ATOM | 2528 | CD2 | LEU | X | 170 | 8.177  | -74.738 | 21.573 | 1.00125.82 |
| C    |      |     |     |   |     |        |         |        |            |

|      |      |     |     |   |     |        |         |        |            |
|------|------|-----|-----|---|-----|--------|---------|--------|------------|
| ATOM | 2529 | N   | ARG | X | 171 | 7.261  | -72.673 | 17.520 | 1.00147.17 |
| N    |      |     |     |   |     |        |         |        |            |
| ATOM | 2530 | CA  | ARG | X | 171 | 6.749  | -72.956 | 16.144 | 1.00143.18 |
| C    |      |     |     |   |     |        |         |        |            |
| ATOM | 2531 | C   | ARG | X | 171 | 6.807  | -74.467 | 15.806 | 1.00125.65 |
| C    |      |     |     |   |     |        |         |        |            |
| ATOM | 2532 | O   | ARG | X | 171 | 7.688  | -75.131 | 16.257 | 1.00118.50 |
| O    |      |     |     |   |     |        |         |        |            |
| ATOM | 2533 | CB  | ARG | X | 171 | 7.635  | -72.197 | 15.132 | 1.00158.23 |
| C    |      |     |     |   |     |        |         |        |            |
| ATOM | 2534 | CG  | ARG | X | 171 | 8.097  | -70.813 | 15.593 | 1.00169.50 |
| C    |      |     |     |   |     |        |         |        |            |
| ATOM | 2535 | CD  | ARG | X | 171 | 9.580  | -70.778 | 15.956 | 1.00178.34 |
| C    |      |     |     |   |     |        |         |        |            |
| ATOM | 2536 | NE  | ARG | X | 171 | 10.424 | -70.437 | 14.805 | 1.00187.43 |
| N    |      |     |     |   |     |        |         |        |            |
| ATOM | 2537 | CZ  | ARG | X | 171 | 10.515 | -69.218 | 14.256 | 1.00189.79 |
| C    |      |     |     |   |     |        |         |        |            |
| ATOM | 2538 | NH1 | ARG | X | 171 | 11.329 | -69.016 | 13.230 | 1.00185.64 |
| N    |      |     |     |   |     |        |         |        |            |
| ATOM | 2539 | NH2 | ARG | X | 171 | 9.807  | -68.196 | 14.727 | 1.00189.87 |
| N1+  |      |     |     |   |     |        |         |        |            |
| ATOM | 2540 | N   | THR | X | 172 | 5.812  | -74.978 | 15.081 | 1.00112.72 |
| N    |      |     |     |   |     |        |         |        |            |
| ATOM | 2541 | CA  | THR | X | 172 | 5.605  | -76.432 | 14.936 | 1.00109.98 |
| C    |      |     |     |   |     |        |         |        |            |
| ATOM | 2542 | C   | THR | X | 172 | 5.840  | -76.980 | 13.496 | 1.00103.38 |
| C    |      |     |     |   |     |        |         |        |            |
| ATOM | 2543 | O   | THR | X | 172 | 4.886  | -77.337 | 12.771 | 1.00107.11 |
| O    |      |     |     |   |     |        |         |        |            |
| ATOM | 2544 | CB  | THR | X | 172 | 4.200  | -76.826 | 15.488 | 1.00118.38 |
| C    |      |     |     |   |     |        |         |        |            |
| ATOM | 2545 | OG1 | THR | X | 172 | 3.299  | -75.688 | 15.454 | 1.00113.22 |
| O    |      |     |     |   |     |        |         |        |            |
| ATOM | 2546 | CG2 | THR | X | 172 | 4.310  | -77.360 | 16.945 | 1.00118.84 |
| C    |      |     |     |   |     |        |         |        |            |
| ATOM | 2547 | N   | GLN | X | 173 | 7.118  | -77.107 | 13.120 | 1.00 97.44 |
| N    |      |     |     |   |     |        |         |        |            |
| ATOM | 2548 | CA  | GLN | X | 173 | 7.466  | -77.871 | 11.912 | 1.00 99.91 |
| C    |      |     |     |   |     |        |         |        |            |
| ATOM | 2549 | C   | GLN | X | 173 | 6.396  | -79.007 | 11.840 | 1.00108.55 |
| C    |      |     |     |   |     |        |         |        |            |
| ATOM | 2550 | O   | GLN | X | 173 | 6.046  | -79.610 | 12.891 | 1.00112.94 |
| O    |      |     |     |   |     |        |         |        |            |
| ATOM | 2551 | CB  | GLN | X | 173 | 8.898  | -78.450 | 11.985 | 1.00 0.00  |
| C    |      |     |     |   |     |        |         |        |            |
| ATOM | 2552 | CG  | GLN | X | 173 | 9.804  | -77.925 | 10.857 | 1.00 0.00  |
| C    |      |     |     |   |     |        |         |        |            |
| ATOM | 2553 | CD  | GLN | X | 173 | 9.368  | -78.344 | 9.447  | 1.00 0.00  |
| C    |      |     |     |   |     |        |         |        |            |
| ATOM | 2554 | OE1 | GLN | X | 173 | 8.675  | -79.343 | 9.259  | 1.00 0.00  |
| O    |      |     |     |   |     |        |         |        |            |
| ATOM | 2555 | NE2 | GLN | X | 173 | 9.802  | -77.585 | 8.437  | 1.00 0.00  |
| N    |      |     |     |   |     |        |         |        |            |

|      |      |     |     |   |     |        |         |        |            |
|------|------|-----|-----|---|-----|--------|---------|--------|------------|
| ATOM | 2556 | N   | SER | X | 174 | 5.733  | -79.172 | 10.682 | 1.00107.86 |
| N    |      |     |     |   |     |        |         |        |            |
| ATOM | 2557 | CA  | SER | X | 174 | 4.590  | -80.105 | 10.612 | 1.00107.38 |
| C    |      |     |     |   |     |        |         |        |            |
| ATOM | 2558 | C   | SER | X | 174 | 5.045  | -81.534 | 10.683 | 1.00103.27 |
| C    |      |     |     |   |     |        |         |        |            |
| ATOM | 2559 | O   | SER | X | 174 | 4.252  | -82.427 | 10.497 | 1.00 95.44 |
| O    |      |     |     |   |     |        |         |        |            |
| ATOM | 2560 | CB  | SER | X | 174 | 3.791  | -79.910 | 9.333  | 1.00111.60 |
| C    |      |     |     |   |     |        |         |        |            |
| ATOM | 2561 | OG  | SER | X | 174 | 4.577  | -80.214 | 8.208  | 1.00114.66 |
| O    |      |     |     |   |     |        |         |        |            |
| ATOM | 2562 | N   | ASP | X | 175 | 6.364  | -81.709 | 10.767 | 1.00116.11 |
| N    |      |     |     |   |     |        |         |        |            |
| ATOM | 2563 | CA  | ASP | X | 175 | 7.035  | -83.015 | 11.030 | 1.00132.37 |
| C    |      |     |     |   |     |        |         |        |            |
| ATOM | 2564 | C   | ASP | X | 175 | 6.977  | -83.500 | 12.530 | 1.00137.67 |
| C    |      |     |     |   |     |        |         |        |            |
| ATOM | 2565 | O   | ASP | X | 175 | 7.793  | -84.357 | 12.979 | 1.00127.87 |
| O    |      |     |     |   |     |        |         |        |            |
| ATOM | 2566 | CB  | ASP | X | 175 | 8.512  | -83.007 | 10.462 | 1.00133.02 |
| C    |      |     |     |   |     |        |         |        |            |
| ATOM | 2567 | CG  | ASP | X | 175 | 9.475  | -82.075 | 11.243 | 1.00123.00 |
| C    |      |     |     |   |     |        |         |        |            |
| ATOM | 2568 | OD1 | ASP | X | 175 | 9.921  | -82.494 | 12.305 | 1.00111.27 |
| O    |      |     |     |   |     |        |         |        |            |
| ATOM | 2569 | OD2 | ASP | X | 175 | 9.842  | -80.976 | 10.762 | 1.00123.72 |
| O1-  |      |     |     |   |     |        |         |        |            |
| ATOM | 2570 | N   | GLY | X | 176 | 5.948  | -83.042 | 13.253 | 1.00134.28 |
| N    |      |     |     |   |     |        |         |        |            |
| ATOM | 2571 | CA  | GLY | X | 176 | 5.702  | -83.506 | 14.593 | 1.00133.51 |
| C    |      |     |     |   |     |        |         |        |            |
| ATOM | 2572 | C   | GLY | X | 176 | 6.769  | -82.975 | 15.537 | 1.00120.89 |
| C    |      |     |     |   |     |        |         |        |            |
| ATOM | 2573 | O   | GLY | X | 176 | 6.769  | -83.312 | 16.718 | 1.00123.01 |
| O    |      |     |     |   |     |        |         |        |            |
| ATOM | 2574 | N   | ILE | X | 177 | 7.686  | -82.164 | 15.012 | 1.00102.09 |
| N    |      |     |     |   |     |        |         |        |            |
| ATOM | 2575 | CA  | ILE | X | 177 | 8.767  | -81.606 | 15.802 | 1.00 91.04 |
| C    |      |     |     |   |     |        |         |        |            |
| ATOM | 2576 | C   | ILE | X | 177 | 8.521  | -80.132 | 16.019 | 1.00101.89 |
| C    |      |     |     |   |     |        |         |        |            |
| ATOM | 2577 | O   | ILE | X | 177 | 8.130  | -79.405 | 15.109 | 1.00112.76 |
| O    |      |     |     |   |     |        |         |        |            |
| ATOM | 2578 | CB  | ILE | X | 177 | 10.091 | -81.782 | 15.087 | 1.00 80.77 |
| C    |      |     |     |   |     |        |         |        |            |
| ATOM | 2579 | CG1 | ILE | X | 177 | 10.562 | -83.236 | 15.233 | 1.00 79.48 |
| C    |      |     |     |   |     |        |         |        |            |
| ATOM | 2580 | CG2 | ILE | X | 177 | 11.109 | -80.786 | 15.552 | 1.00 76.51 |
| C    |      |     |     |   |     |        |         |        |            |
| ATOM | 2581 | CD1 | ILE | X | 177 | 11.916 | -83.466 | 15.884 | 1.00 76.13 |
| C    |      |     |     |   |     |        |         |        |            |
| ATOM | 2582 | N   | GLN | X | 178 | 8.852  | -79.668 | 17.233 | 1.00107.97 |
| N    |      |     |     |   |     |        |         |        |            |

|      |      |     |     |   |     |        |         |        |      |        |
|------|------|-----|-----|---|-----|--------|---------|--------|------|--------|
| ATOM | 2583 | CA  | GLN | X | 178 | 8.954  | -78.229 | 17.519 | 1.00 | 99.28  |
| C    |      |     |     |   |     |        |         |        |      |        |
| ATOM | 2584 | C   | GLN | X | 178 | 10.320 | -77.691 | 17.264 | 1.00 | 90.54  |
| C    |      |     |     |   |     |        |         |        |      |        |
| ATOM | 2585 | O   | GLN | X | 178 | 11.263 | -78.345 | 17.486 | 1.00 | 88.85  |
| O    |      |     |     |   |     |        |         |        |      |        |
| ATOM | 2586 | CB  | GLN | X | 178 | 8.684  | -77.956 | 18.967 | 1.00 | 102.95 |
| C    |      |     |     |   |     |        |         |        |      |        |
| ATOM | 2587 | CG  | GLN | X | 178 | 7.232  | -77.778 | 19.271 | 1.00 | 112.29 |
| C    |      |     |     |   |     |        |         |        |      |        |
| ATOM | 2588 | CD  | GLN | X | 178 | 6.825  | -78.616 | 20.433 | 1.00 | 122.56 |
| C    |      |     |     |   |     |        |         |        |      |        |
| ATOM | 2589 | OE1 | GLN | X | 178 | 7.674  | -79.003 | 21.261 | 1.00 | 118.15 |
| O    |      |     |     |   |     |        |         |        |      |        |
| ATOM | 2590 | NE2 | GLN | X | 178 | 5.545  | -79.011 | 20.456 | 1.00 | 132.16 |
| N    |      |     |     |   |     |        |         |        |      |        |
| ATOM | 2591 | N   | GLN | X | 179 | 10.375 | -76.437 | 16.831 | 1.00 | 89.44  |
| N    |      |     |     |   |     |        |         |        |      |        |
| ATOM | 2592 | CA  | GLN | X | 179 | 11.600 | -75.641 | 16.937 | 1.00 | 99.52  |
| C    |      |     |     |   |     |        |         |        |      |        |
| ATOM | 2593 | C   | GLN | X | 179 | 11.253 | -74.395 | 17.792 | 1.00 | 102.30 |
| C    |      |     |     |   |     |        |         |        |      |        |
| ATOM | 2594 | O   | GLN | X | 179 | 10.209 | -73.751 | 17.621 | 1.00 | 98.57  |
| O    |      |     |     |   |     |        |         |        |      |        |
| ATOM | 2595 | CB  | GLN | X | 179 | 12.196 | -75.256 | 15.546 | 1.00 | 107.91 |
| C    |      |     |     |   |     |        |         |        |      |        |
| ATOM | 2596 | CG  | GLN | X | 179 | 11.292 | -75.401 | 14.318 | 1.00 | 116.75 |
| C    |      |     |     |   |     |        |         |        |      |        |
| ATOM | 2597 | CD  | GLN | X | 179 | 11.706 | -76.570 | 13.402 | 1.00 | 134.51 |
| C    |      |     |     |   |     |        |         |        |      |        |
| ATOM | 2598 | NE2 | GLN | X | 179 | 12.874 | -76.988 | 13.414 | 1.00 | 163.61 |
| N    |      |     |     |   |     |        |         |        |      |        |
| ATOM | 2599 | OE1 | GLN | X | 179 | 10.753 | -77.095 | 12.592 | 1.00 | 123.98 |
| O    |      |     |     |   |     |        |         |        |      |        |
| ATOM | 2600 | N   | ALA | X | 180 | 12.048 | -74.215 | 18.839 | 1.00 | 101.15 |
| N    |      |     |     |   |     |        |         |        |      |        |
| ATOM | 2601 | CA  | ALA | X | 180 | 11.738 | -73.343 | 19.967 | 1.00 | 101.17 |
| C    |      |     |     |   |     |        |         |        |      |        |
| ATOM | 2602 | C   | ALA | X | 180 | 12.616 | -72.069 | 19.974 | 1.00 | 105.02 |
| C    |      |     |     |   |     |        |         |        |      |        |
| ATOM | 2603 | O   | ALA | X | 180 | 13.852 | -72.192 | 19.989 | 1.00 | 100.41 |
| O    |      |     |     |   |     |        |         |        |      |        |
| ATOM | 2604 | CB  | ALA | X | 180 | 11.983 | -74.114 | 21.253 | 1.00 | 97.61  |
| C    |      |     |     |   |     |        |         |        |      |        |
| ATOM | 2605 | N   | LYS | X | 181 | 11.957 | -70.892 | 19.946 | 1.00 | 107.73 |
| N    |      |     |     |   |     |        |         |        |      |        |
| ATOM | 2606 | CA  | LYS | X | 181 | 12.610 | -69.639 | 20.074 | 1.00 | 107.46 |
| C    |      |     |     |   |     |        |         |        |      |        |
| ATOM | 2607 | C   | LYS | X | 181 | 12.942 | -69.383 | 21.553 | 1.00 | 101.40 |
| C    |      |     |     |   |     |        |         |        |      |        |
| ATOM | 2608 | O   | LYS | X | 181 | 12.074 | -69.424 | 22.435 | 1.00 | 88.12  |
| O    |      |     |     |   |     |        |         |        |      |        |
| ATOM | 2609 | CB  | LYS | X | 181 | 11.812 | -68.517 | 19.454 | 1.00 | 129.13 |
| C    |      |     |     |   |     |        |         |        |      |        |

|      |      |     |     |   |     |        |         |        |            |
|------|------|-----|-----|---|-----|--------|---------|--------|------------|
| ATOM | 2610 | CG  | LYS | X | 181 | 12.669 | -67.419 | 18.814 | 1.00151.81 |
| C    |      |     |     |   |     |        |         |        |            |
| ATOM | 2611 | CD  | LYS | X | 181 | 11.812 | -66.425 | 17.987 | 1.00169.49 |
| C    |      |     |     |   |     |        |         |        |            |
| ATOM | 2612 | CE  | LYS | X | 181 | 12.063 | -64.944 | 18.322 | 1.00177.12 |
| C    |      |     |     |   |     |        |         |        |            |
| ATOM | 2613 | NZ  | LYS | X | 181 | 13.425 | -64.472 | 17.922 | 1.00188.27 |
| N1+  |      |     |     |   |     |        |         |        |            |
| ATOM | 2614 | N   | VAL | X | 182 | 14.230 | -69.186 | 21.821 | 1.00102.29 |
| N    |      |     |     |   |     |        |         |        |            |
| ATOM | 2615 | CA  | VAL | X | 182 | 14.782 | -69.563 | 23.135 | 1.00101.45 |
| C    |      |     |     |   |     |        |         |        |            |
| ATOM | 2616 | C   | VAL | X | 182 | 15.858 | -68.565 | 23.549 | 1.00 99.33 |
| C    |      |     |     |   |     |        |         |        |            |
| ATOM | 2617 | O   | VAL | X | 182 | 16.797 | -68.316 | 22.789 | 1.00102.47 |
| O    |      |     |     |   |     |        |         |        |            |
| ATOM | 2618 | CB  | VAL | X | 182 | 15.294 | -71.026 | 23.108 | 1.00 99.16 |
| C    |      |     |     |   |     |        |         |        |            |
| ATOM | 2619 | CG1 | VAL | X | 182 | 16.811 | -71.101 | 23.087 | 1.00 97.05 |
| C    |      |     |     |   |     |        |         |        |            |
| ATOM | 2620 | CG2 | VAL | X | 182 | 14.723 | -71.808 | 24.280 | 1.00 93.94 |
| C    |      |     |     |   |     |        |         |        |            |
| ATOM | 2621 | N   | GLN | X | 183 | 15.671 | -67.941 | 24.719 | 1.00 95.89 |
| N    |      |     |     |   |     |        |         |        |            |
| ATOM | 2622 | CA  | GLN | X | 183 | 16.655 | -67.001 | 25.242 | 1.00 98.05 |
| C    |      |     |     |   |     |        |         |        |            |
| ATOM | 2623 | C   | GLN | X | 183 | 17.455 | -67.640 | 26.393 | 1.00 94.17 |
| C    |      |     |     |   |     |        |         |        |            |
| ATOM | 2624 | O   | GLN | X | 183 | 16.897 | -68.040 | 27.420 | 1.00 88.47 |
| O    |      |     |     |   |     |        |         |        |            |
| ATOM | 2625 | CB  | GLN | X | 183 | 15.970 | -65.704 | 25.631 | 1.00103.86 |
| C    |      |     |     |   |     |        |         |        |            |
| ATOM | 2626 | CG  | GLN | X | 183 | 16.829 | -64.681 | 26.326 | 1.00108.17 |
| C    |      |     |     |   |     |        |         |        |            |
| ATOM | 2627 | CD  | GLN | X | 183 | 16.101 | -64.066 | 27.531 | 1.00115.21 |
| C    |      |     |     |   |     |        |         |        |            |
| ATOM | 2628 | OE1 | GLN | X | 183 | 14.873 | -63.919 | 27.536 | 1.00113.56 |
| O    |      |     |     |   |     |        |         |        |            |
| ATOM | 2629 | NE2 | GLN | X | 183 | 16.860 | -63.724 | 28.561 | 1.00120.39 |
| N    |      |     |     |   |     |        |         |        |            |
| ATOM | 2630 | N   | ILE | X | 184 | 18.772 | -67.737 | 26.202 | 1.00 91.85 |
| N    |      |     |     |   |     |        |         |        |            |
| ATOM | 2631 | CA  | ILE | X | 184 | 19.636 | -68.339 | 27.196 | 1.00 93.11 |
| C    |      |     |     |   |     |        |         |        |            |
| ATOM | 2632 | C   | ILE | X | 184 | 19.584 | -67.582 | 28.509 | 1.00 94.52 |
| C    |      |     |     |   |     |        |         |        |            |
| ATOM | 2633 | O   | ILE | X | 184 | 19.722 | -66.345 | 28.529 | 1.00 92.20 |
| O    |      |     |     |   |     |        |         |        |            |
| ATOM | 2634 | CB  | ILE | X | 184 | 21.081 | -68.364 | 26.775 | 1.00 98.36 |
| C    |      |     |     |   |     |        |         |        |            |
| ATOM | 2635 | CG1 | ILE | X | 184 | 21.175 | -68.769 | 25.316 | 1.00105.32 |
| C    |      |     |     |   |     |        |         |        |            |
| ATOM | 2636 | CG2 | ILE | X | 184 | 21.872 | -69.305 | 27.690 | 1.00 97.03 |
| C    |      |     |     |   |     |        |         |        |            |

|             |      |     |     |   |     |        |         |        |            |
|-------------|------|-----|-----|---|-----|--------|---------|--------|------------|
| ATOM<br>C   | 2637 | CD1 | ILE | X | 184 | 20.425 | -70.039 | 25.003 | 1.00110.25 |
| ATOM<br>N   | 2638 | N   | LEU | X | 185 | 19.414 | -68.309 | 29.604 | 1.00 99.02 |
| ATOM<br>C   | 2639 | CA  | LEU | X | 185 | 19.516 | -67.721 | 30.932 | 1.00104.37 |
| ATOM<br>C   | 2640 | C   | LEU | X | 185 | 20.946 | -67.801 | 31.407 | 1.00105.30 |
| ATOM<br>O   | 2641 | O   | LEU | X | 185 | 21.505 | -68.864 | 31.490 | 1.00 97.83 |
| ATOM<br>C   | 2642 | CB  | LEU | X | 185 | 18.611 | -68.452 | 31.917 | 1.00104.94 |
| ATOM<br>C   | 2643 | CG  | LEU | X | 185 | 17.122 | -68.431 | 31.529 | 1.00107.57 |
| ATOM<br>C   | 2644 | CD1 | LEU | X | 185 | 16.337 | -69.273 | 32.512 | 1.00110.67 |
| ATOM<br>C   | 2645 | CD2 | LEU | X | 185 | 16.537 | -67.015 | 31.473 | 1.00110.17 |
| ATOM<br>N   | 2646 | N   | PRO | X | 186 | 21.523 | -66.632 | 31.813 | 1.00110.75 |
| ATOM<br>C   | 2647 | CA  | PRO | X | 186 | 22.869 | -66.569 | 32.404 | 1.00118.94 |
| ATOM<br>C   | 2648 | C   | PRO | X | 186 | 22.822 | -67.119 | 33.818 | 1.00139.27 |
| ATOM<br>O   | 2649 | O   | PRO | X | 186 | 21.827 | -66.890 | 34.515 | 1.00139.79 |
| ATOM<br>C   | 2650 | CB  | PRO | X | 186 | 23.129 | -65.085 | 32.450 | 1.00117.36 |
| ATOM<br>C   | 2651 | CG  | PRO | X | 186 | 21.759 | -64.482 | 32.681 | 1.00114.99 |
| ATOM<br>C   | 2652 | CD  | PRO | X | 186 | 20.730 | -65.442 | 32.179 | 1.00108.75 |
| ATOM<br>N   | 2653 | N   | GLU | X | 187 | 23.865 | -67.836 | 34.264 | 1.00115.72 |
| ATOM<br>C   | 2654 | CA  | GLU | X | 187 | 23.986 | -68.167 | 35.691 | 1.00150.79 |
| ATOM<br>C   | 2655 | C   | GLU | X | 187 | 24.498 | -66.927 | 36.413 | 1.00162.60 |
| ATOM<br>O   | 2656 | O   | GLU | X | 187 | 25.617 | -66.435 | 36.169 | 1.00204.89 |
| ATOM<br>C   | 2657 | CB  | GLU | X | 187 | 24.907 | -69.377 | 35.926 | 1.00166.02 |
| ATOM<br>C   | 2658 | CG  | GLU | X | 187 | 25.290 | -69.624 | 37.394 | 1.00177.96 |
| ATOM<br>C   | 2659 | CD  | GLU | X | 187 | 24.290 | -70.475 | 38.181 | 1.00162.14 |
| ATOM<br>O   | 2660 | OE1 | GLU | X | 187 | 23.929 | -71.578 | 37.715 | 1.00148.05 |
| ATOM<br>O1- | 2661 | OE2 | GLU | X | 187 | 23.904 | -70.060 | 39.301 | 1.00158.82 |
| ATOM<br>N   | 2662 | N   | CYS | X | 188 | 23.638 | -66.442 | 37.322 | 1.00154.37 |
| ATOM<br>C   | 2663 | CA  | CYS | X | 188 | 23.831 | -65.137 | 37.909 | 1.00149.26 |

|      |      |     |     |   |     |        |         |        |            |
|------|------|-----|-----|---|-----|--------|---------|--------|------------|
| ATOM | 2664 | C   | CYS | X | 188 | 24.761 | -65.269 | 39.137 | 1.00134.50 |
| C    |      |     |     |   |     |        |         |        |            |
| ATOM | 2665 | O   | CYS | X | 188 | 24.462 | -65.946 | 40.136 | 1.00116.20 |
| O    |      |     |     |   |     |        |         |        |            |
| ATOM | 2666 | CB  | CYS | X | 188 | 22.487 | -64.447 | 38.214 | 1.00133.88 |
| C    |      |     |     |   |     |        |         |        |            |
| ATOM | 2667 | SG  | CYS | X | 188 | 21.587 | -65.049 | 39.653 | 1.00156.93 |
| S    |      |     |     |   |     |        |         |        |            |
| ATOM | 2668 | N   | VAL | X | 189 | 25.950 | -64.681 | 38.980 | 1.00116.25 |
| N    |      |     |     |   |     |        |         |        |            |
| ATOM | 2669 | CA  | VAL | X | 189 | 27.040 | -64.850 | 39.932 | 1.00117.79 |
| C    |      |     |     |   |     |        |         |        |            |
| ATOM | 2670 | C   | VAL | X | 189 | 27.296 | -63.588 | 40.733 | 1.00145.71 |
| C    |      |     |     |   |     |        |         |        |            |
| ATOM | 2671 | O   | VAL | X | 189 | 27.469 | -62.476 | 40.199 | 1.00164.13 |
| O    |      |     |     |   |     |        |         |        |            |
| ATOM | 2672 | CB  | VAL | X | 189 | 28.374 | -65.257 | 39.287 | 1.00 98.97 |
| C    |      |     |     |   |     |        |         |        |            |
| ATOM | 2673 | CG1 | VAL | X | 189 | 28.501 | -66.772 | 39.252 | 1.00 90.47 |
| C    |      |     |     |   |     |        |         |        |            |
| ATOM | 2674 | CG2 | VAL | X | 189 | 28.544 | -64.615 | 37.915 | 1.00104.27 |
| C    |      |     |     |   |     |        |         |        |            |
| ATOM | 2675 | N   | LEU | X | 190 | 27.388 | -63.845 | 42.049 | 1.00157.61 |
| N    |      |     |     |   |     |        |         |        |            |
| ATOM | 2676 | CA  | LEU | X | 190 | 27.595 | -62.837 | 43.110 | 1.00117.92 |
| C    |      |     |     |   |     |        |         |        |            |
| ATOM | 2677 | C   | LEU | X | 190 | 29.016 | -62.967 | 43.671 | 1.00100.24 |
| C    |      |     |     |   |     |        |         |        |            |
| ATOM | 2678 | O   | LEU | X | 190 | 29.525 | -64.092 | 43.791 | 1.00122.41 |
| O    |      |     |     |   |     |        |         |        |            |
| ATOM | 2679 | CB  | LEU | X | 190 | 26.645 | -63.081 | 44.304 | 1.00108.41 |
| C    |      |     |     |   |     |        |         |        |            |
| ATOM | 2680 | CG  | LEU | X | 190 | 25.123 | -63.239 | 44.167 | 1.00112.60 |
| C    |      |     |     |   |     |        |         |        |            |
| ATOM | 2681 | CD1 | LEU | X | 190 | 24.441 | -62.580 | 45.352 | 1.00104.55 |
| C    |      |     |     |   |     |        |         |        |            |
| ATOM | 2682 | CD2 | LEU | X | 190 | 24.559 | -62.667 | 42.876 | 1.00125.50 |
| C    |      |     |     |   |     |        |         |        |            |
| ATOM | 2683 | N   | PRO | X | 191 | 29.636 | -61.831 | 44.030 | 1.00 88.50 |
| N    |      |     |     |   |     |        |         |        |            |
| ATOM | 2684 | CA  | PRO | X | 191 | 30.911 | -61.870 | 44.745 | 1.00106.66 |
| C    |      |     |     |   |     |        |         |        |            |
| ATOM | 2685 | C   | PRO | X | 191 | 30.690 | -62.446 | 46.138 | 1.00116.19 |
| C    |      |     |     |   |     |        |         |        |            |
| ATOM | 2686 | O   | PRO | X | 191 | 29.611 | -62.981 | 46.404 | 1.00140.60 |
| O    |      |     |     |   |     |        |         |        |            |
| ATOM | 2687 | CB  | PRO | X | 191 | 31.327 | -60.405 | 44.795 | 1.00112.32 |
| C    |      |     |     |   |     |        |         |        |            |
| ATOM | 2688 | CG  | PRO | X | 191 | 30.056 | -59.631 | 44.683 | 1.00111.42 |
| C    |      |     |     |   |     |        |         |        |            |
| ATOM | 2689 | CD  | PRO | X | 191 | 28.983 | -60.522 | 44.136 | 1.00 89.46 |
| C    |      |     |     |   |     |        |         |        |            |
| ATOM | 2690 | N   | SER | X | 192 | 31.684 | -62.368 | 47.023 | 1.00125.78 |
| N    |      |     |     |   |     |        |         |        |            |

|      |      |     |     |   |     |        |         |        |            |
|------|------|-----|-----|---|-----|--------|---------|--------|------------|
| ATOM | 2691 | CA  | SER | X | 192 | 31.472 | -62.788 | 48.410 | 1.00120.42 |
| C    |      |     |     |   |     |        |         |        |            |
| ATOM | 2692 | C   | SER | X | 192 | 30.535 | -61.790 | 49.093 | 1.00115.25 |
| C    |      |     |     |   |     |        |         |        |            |
| ATOM | 2693 | O   | SER | X | 192 | 30.387 | -60.657 | 48.629 | 1.00127.42 |
| O    |      |     |     |   |     |        |         |        |            |
| ATOM | 2694 | CB  | SER | X | 192 | 32.797 | -62.874 | 49.178 | 1.00118.35 |
| C    |      |     |     |   |     |        |         |        |            |
| ATOM | 2695 | OG  | SER | X | 192 | 32.577 | -62.862 | 50.578 | 1.00115.93 |
| O    |      |     |     |   |     |        |         |        |            |
| ATOM | 2696 | N   | THR | X | 193 | 29.941 | -62.188 | 50.206 | 1.00100.75 |
| N    |      |     |     |   |     |        |         |        |            |
| ATOM | 2697 | CA  | THR | X | 193 | 29.129 | -61.281 | 50.986 | 1.00 88.71 |
| C    |      |     |     |   |     |        |         |        |            |
| ATOM | 2698 | C   | THR | X | 193 | 29.947 | -60.099 | 51.541 | 1.00 88.69 |
| C    |      |     |     |   |     |        |         |        |            |
| ATOM | 2699 | O   | THR | X | 193 | 29.390 | -59.031 | 51.849 | 1.00120.72 |
| O    |      |     |     |   |     |        |         |        |            |
| ATOM | 2700 | CB  | THR | X | 193 | 28.443 | -62.078 | 52.101 | 1.00 96.99 |
| C    |      |     |     |   |     |        |         |        |            |
| ATOM | 2701 | OG1 | THR | X | 193 | 29.005 | -63.405 | 52.147 | 1.00109.50 |
| O    |      |     |     |   |     |        |         |        |            |
| ATOM | 2702 | CG2 | THR | X | 193 | 26.947 | -62.198 | 51.841 | 1.00 80.41 |
| C    |      |     |     |   |     |        |         |        |            |
| ATOM | 2703 | N   | MET | X | 194 | 31.265 | -60.275 | 51.627 | 1.00 85.10 |
| N    |      |     |     |   |     |        |         |        |            |
| ATOM | 2704 | CA  | MET | X | 194 | 32.123 | -59.307 | 52.292 | 1.00102.24 |
| C    |      |     |     |   |     |        |         |        |            |
| ATOM | 2705 | C   | MET | X | 194 | 32.786 | -58.315 | 51.334 | 1.00105.29 |
| C    |      |     |     |   |     |        |         |        |            |
| ATOM | 2706 | O   | MET | X | 194 | 33.160 | -57.233 | 51.724 | 1.00116.62 |
| O    |      |     |     |   |     |        |         |        |            |
| ATOM | 2707 | CB  | MET | X | 194 | 33.197 | -60.033 | 53.094 | 1.00110.75 |
| C    |      |     |     |   |     |        |         |        |            |
| ATOM | 2708 | CG  | MET | X | 194 | 32.643 | -60.783 | 54.295 | 1.00126.09 |
| C    |      |     |     |   |     |        |         |        |            |
| ATOM | 2709 | SD  | MET | X | 194 | 31.546 | -59.768 | 55.313 | 1.00119.00 |
| S    |      |     |     |   |     |        |         |        |            |
| ATOM | 2710 | CE  | MET | X | 194 | 30.521 | -61.027 | 56.080 | 1.00 93.80 |
| C    |      |     |     |   |     |        |         |        |            |
| ATOM | 2711 | N   | SER | X | 195 | 32.962 | -58.707 | 50.090 | 1.00116.78 |
| N    |      |     |     |   |     |        |         |        |            |
| ATOM | 2712 | CA  | SER | X | 195 | 33.517 | -57.861 | 49.047 | 1.00119.43 |
| C    |      |     |     |   |     |        |         |        |            |
| ATOM | 2713 | C   | SER | X | 195 | 32.929 | -56.455 | 48.940 | 1.00104.83 |
| C    |      |     |     |   |     |        |         |        |            |
| ATOM | 2714 | O   | SER | X | 195 | 33.446 | -55.643 | 48.190 | 1.00141.86 |
| O    |      |     |     |   |     |        |         |        |            |
| ATOM | 2715 | CB  | SER | X | 195 | 33.364 | -58.567 | 47.703 | 1.00133.13 |
| C    |      |     |     |   |     |        |         |        |            |
| ATOM | 2716 | OG  | SER | X | 195 | 33.847 | -59.898 | 47.785 | 1.00154.52 |
| O    |      |     |     |   |     |        |         |        |            |
| ATOM | 2717 | N   | ALA | X | 196 | 31.854 | -56.173 | 49.670 | 1.00 95.03 |
| N    |      |     |     |   |     |        |         |        |            |



|      |      |     |     |   |     |        |         |        |            |
|------|------|-----|-----|---|-----|--------|---------|--------|------------|
| ATOM | 2718 | CA  | ALA | X | 196 | 31.165 | -54.872 | 49.594 | 1.00120.88 |
| C    |      |     |     |   |     |        |         |        |            |
| ATOM | 2719 | C   | ALA | X | 196 | 31.628 | -53.973 | 50.759 | 1.00122.83 |
| C    |      |     |     |   |     |        |         |        |            |
| ATOM | 2720 | O   | ALA | X | 196 | 31.735 | -52.765 | 50.661 | 1.00108.09 |
| O    |      |     |     |   |     |        |         |        |            |
| ATOM | 2721 | CB  | ALA | X | 196 | 29.645 | -55.086 | 49.672 | 1.00115.59 |
| C    |      |     |     |   |     |        |         |        |            |
| ATOM | 2722 | N   | VAL | X | 197 | 31.864 | -54.626 | 51.868 | 1.00139.78 |
| N    |      |     |     |   |     |        |         |        |            |
| ATOM | 2723 | CA  | VAL | X | 197 | 31.973 | -54.005 | 53.160 | 1.00112.85 |
| C    |      |     |     |   |     |        |         |        |            |
| ATOM | 2724 | C   | VAL | X | 197 | 33.421 | -54.153 | 53.697 | 1.00119.14 |
| C    |      |     |     |   |     |        |         |        |            |
| ATOM | 2725 | O   | VAL | X | 197 | 33.747 | -53.615 | 54.771 | 1.00 88.08 |
| O    |      |     |     |   |     |        |         |        |            |
| ATOM | 2726 | CB  | VAL | X | 197 | 30.955 | -54.741 | 54.053 | 1.00103.38 |
| C    |      |     |     |   |     |        |         |        |            |
| ATOM | 2727 | CG1 | VAL | X | 197 | 31.611 | -55.801 | 54.946 | 1.00 91.04 |
| C    |      |     |     |   |     |        |         |        |            |
| ATOM | 2728 | CG2 | VAL | X | 197 | 30.090 | -53.760 | 54.799 | 1.00105.24 |
| C    |      |     |     |   |     |        |         |        |            |
| ATOM | 2729 | N   | GLN | X | 198 | 34.264 | -54.838 | 52.920 | 1.00155.95 |
| N    |      |     |     |   |     |        |         |        |            |
| ATOM | 2730 | CA  | GLN | X | 198 | 35.580 | -55.289 | 53.391 | 1.00147.41 |
| C    |      |     |     |   |     |        |         |        |            |
| ATOM | 2731 | C   | GLN | X | 198 | 36.543 | -54.128 | 53.553 | 1.00126.08 |
| C    |      |     |     |   |     |        |         |        |            |
| ATOM | 2732 | O   | GLN | X | 198 | 36.801 | -53.381 | 52.622 | 1.00137.81 |
| O    |      |     |     |   |     |        |         |        |            |
| ATOM | 2733 | CB  | GLN | X | 198 | 36.156 | -56.299 | 52.386 | 1.00164.61 |
| C    |      |     |     |   |     |        |         |        |            |
| ATOM | 2734 | CG  | GLN | X | 198 | 37.460 | -56.962 | 52.801 | 1.00166.86 |
| C    |      |     |     |   |     |        |         |        |            |
| ATOM | 2735 | CD  | GLN | X | 198 | 37.252 | -58.172 | 53.696 | 1.00150.81 |
| C    |      |     |     |   |     |        |         |        |            |
| ATOM | 2736 | NE2 | GLN | X | 198 | 36.545 | -59.109 | 53.337 | 1.00135.09 |
| N    |      |     |     |   |     |        |         |        |            |
| ATOM | 2737 | OE1 | GLN | X | 198 | 37.898 | -58.168 | 54.852 | 1.00147.02 |
| O    |      |     |     |   |     |        |         |        |            |
| ATOM | 2738 | N   | LEU | X | 199 | 37.098 | -54.016 | 54.743 | 1.00121.26 |
| N    |      |     |     |   |     |        |         |        |            |
| ATOM | 2739 | CA  | LEU | X | 199 | 38.202 | -53.109 | 55.002 | 1.00148.55 |
| C    |      |     |     |   |     |        |         |        |            |
| ATOM | 2740 | C   | LEU | X | 199 | 39.339 | -53.422 | 54.054 | 1.00170.44 |
| C    |      |     |     |   |     |        |         |        |            |
| ATOM | 2741 | O   | LEU | X | 199 | 39.651 | -54.585 | 53.869 | 1.00173.78 |
| O    |      |     |     |   |     |        |         |        |            |
| ATOM | 2742 | CB  | LEU | X | 199 | 38.695 | -53.298 | 56.453 | 1.00157.55 |
| C    |      |     |     |   |     |        |         |        |            |
| ATOM | 2743 | CG  | LEU | X | 199 | 37.646 | -53.084 | 57.548 | 1.00142.77 |
| C    |      |     |     |   |     |        |         |        |            |
| ATOM | 2744 | CD1 | LEU | X | 199 | 38.204 | -53.200 | 58.976 | 1.00113.46 |
| C    |      |     |     |   |     |        |         |        |            |

|      |      |     |     |   |     |        |         |        |            |
|------|------|-----|-----|---|-----|--------|---------|--------|------------|
| ATOM | 2745 | CD2 | LEU | X | 199 | 36.910 | -51.759 | 57.323 | 1.00142.62 |
| C    |      |     |     |   |     |        |         |        |            |
| ATOM | 2746 | N   | GLU | X | 200 | 39.923 | -52.392 | 53.439 | 1.00175.51 |
| N    |      |     |     |   |     |        |         |        |            |
| ATOM | 2747 | CA  | GLU | X | 200 | 40.970 | -52.605 | 52.439 | 1.00173.98 |
| C    |      |     |     |   |     |        |         |        |            |
| ATOM | 2748 | C   | GLU | X | 200 | 42.242 | -53.176 | 53.047 | 1.00162.59 |
| C    |      |     |     |   |     |        |         |        |            |
| ATOM | 2749 | O   | GLU | X | 200 | 42.922 | -53.980 | 52.411 | 1.00173.12 |
| O    |      |     |     |   |     |        |         |        |            |
| ATOM | 2750 | CB  | GLU | X | 200 | 41.262 | -51.328 | 51.646 | 1.00172.32 |
| C    |      |     |     |   |     |        |         |        |            |
| ATOM | 2751 | CG  | GLU | X | 200 | 40.264 | -51.064 | 50.515 | 1.00194.36 |
| C    |      |     |     |   |     |        |         |        |            |
| ATOM | 2752 | CD  | GLU | X | 200 | 40.185 | -52.199 | 49.490 | 1.00199.27 |
| C    |      |     |     |   |     |        |         |        |            |
| ATOM | 2753 | OE1 | GLU | X | 200 | 41.073 | -52.282 | 48.611 | 1.00194.94 |
| O    |      |     |     |   |     |        |         |        |            |
| ATOM | 2754 | OE2 | GLU | X | 200 | 39.207 | -52.983 | 49.534 | 1.00165.71 |
| O1-  |      |     |     |   |     |        |         |        |            |
| ATOM | 2755 | N   | SER | X | 201 | 42.555 | -52.776 | 54.277 | 1.00163.73 |
| N    |      |     |     |   |     |        |         |        |            |
| ATOM | 2756 | CA  | SER | X | 201 | 43.769 | -53.262 | 54.949 | 1.00174.53 |
| C    |      |     |     |   |     |        |         |        |            |
| ATOM | 2757 | C   | SER | X | 201 | 43.762 | -54.787 | 55.163 | 1.00183.12 |
| C    |      |     |     |   |     |        |         |        |            |
| ATOM | 2758 | O   | SER | X | 201 | 44.827 | -55.413 | 55.190 | 1.00190.61 |
| O    |      |     |     |   |     |        |         |        |            |
| ATOM | 2759 | CB  | SER | X | 201 | 43.989 | -52.546 | 56.288 | 1.00169.09 |
| C    |      |     |     |   |     |        |         |        |            |
| ATOM | 2760 | OG  | SER | X | 201 | 43.090 | -53.005 | 57.285 | 1.00146.88 |
| O    |      |     |     |   |     |        |         |        |            |
| ATOM | 2761 | N   | LEU | X | 202 | 42.566 | -55.369 | 55.304 | 1.00157.79 |
| N    |      |     |     |   |     |        |         |        |            |
| ATOM | 2762 | CA  | LEU | X | 202 | 42.405 | -56.792 | 55.586 | 1.00157.48 |
| C    |      |     |     |   |     |        |         |        |            |
| ATOM | 2763 | C   | LEU | X | 202 | 42.234 | -57.626 | 54.307 | 1.00152.97 |
| C    |      |     |     |   |     |        |         |        |            |
| ATOM | 2764 | O   | LEU | X | 202 | 42.224 | -58.856 | 54.367 | 1.00179.36 |
| O    |      |     |     |   |     |        |         |        |            |
| ATOM | 2765 | CB  | LEU | X | 202 | 41.223 | -56.994 | 56.533 | 1.00184.89 |
| C    |      |     |     |   |     |        |         |        |            |
| ATOM | 2766 | CG  | LEU | X | 202 | 41.271 | -56.137 | 57.808 | 1.00208.98 |
| C    |      |     |     |   |     |        |         |        |            |
| ATOM | 2767 | CD1 | LEU | X | 202 | 40.164 | -56.527 | 58.781 | 1.00244.96 |
| C    |      |     |     |   |     |        |         |        |            |
| ATOM | 2768 | CD2 | LEU | X | 202 | 42.633 | -56.239 | 58.481 | 1.00206.69 |
| C    |      |     |     |   |     |        |         |        |            |
| ATOM | 2769 | N   | ASN | X | 203 | 42.161 | -56.956 | 53.162 | 1.00153.56 |
| N    |      |     |     |   |     |        |         |        |            |
| ATOM | 2770 | CA  | ASN | X | 203 | 42.196 | -57.660 | 51.881 | 1.00167.26 |
| C    |      |     |     |   |     |        |         |        |            |
| ATOM | 2771 | C   | ASN | X | 203 | 43.361 | -58.650 | 51.812 | 1.00176.75 |
| C    |      |     |     |   |     |        |         |        |            |

|      |      |     |     |   |     |        |         |        |            |
|------|------|-----|-----|---|-----|--------|---------|--------|------------|
| ATOM | 2772 | O   | ASN | X | 203 | 43.202 | -59.787 | 51.353 | 1.00207.43 |
| O    |      |     |     |   |     |        |         |        |            |
| ATOM | 2773 | CB  | ASN | X | 203 | 42.360 | -56.675 | 50.712 | 1.00163.81 |
| C    |      |     |     |   |     |        |         |        |            |
| ATOM | 2774 | CG  | ASN | X | 203 | 41.040 | -56.175 | 50.161 | 1.00153.29 |
| C    |      |     |     |   |     |        |         |        |            |
| ATOM | 2775 | ND2 | ASN | X | 203 | 40.902 | -54.993 | 49.837 | 1.00 94.23 |
| N    |      |     |     |   |     |        |         |        |            |
| ATOM | 2776 | OD1 | ASN | X | 203 | 40.083 | -57.082 | 49.989 | 1.00171.49 |
| O    |      |     |     |   |     |        |         |        |            |
| ATOM | 2777 | N   | LYS | X | 204 | 44.523 | -58.211 | 52.290 | 1.00162.85 |
| N    |      |     |     |   |     |        |         |        |            |
| ATOM | 2778 | CA  | LYS | X | 204 | 45.760 | -58.988 | 52.224 | 1.00155.14 |
| C    |      |     |     |   |     |        |         |        |            |
| ATOM | 2779 | C   | LYS | X | 204 | 45.670 | -60.332 | 52.953 | 1.00151.12 |
| C    |      |     |     |   |     |        |         |        |            |
| ATOM | 2780 | O   | LYS | X | 204 | 46.509 | -61.201 | 52.740 | 1.00129.29 |
| O    |      |     |     |   |     |        |         |        |            |
| ATOM | 2781 | CB  | LYS | X | 204 | 46.936 | -58.131 | 52.700 | 1.00163.71 |
| C    |      |     |     |   |     |        |         |        |            |
| ATOM | 2782 | CG  | LYS | X | 204 | 47.219 | -56.965 | 51.748 | 1.00167.40 |
| C    |      |     |     |   |     |        |         |        |            |
| ATOM | 2783 | CD  | LYS | X | 204 | 48.045 | -55.851 | 52.379 | 1.00173.11 |
| C    |      |     |     |   |     |        |         |        |            |
| ATOM | 2784 | CE  | LYS | X | 204 | 47.225 | -54.940 | 53.281 | 1.00170.21 |
| C    |      |     |     |   |     |        |         |        |            |
| ATOM | 2785 | NZ  | LYS | X | 204 | 47.572 | -55.126 | 54.719 | 1.00163.87 |
| N1+  |      |     |     |   |     |        |         |        |            |
| ATOM | 2786 | N   | CYS | X | 205 | 44.635 | -60.525 | 53.766 | 1.00176.48 |
| N    |      |     |     |   |     |        |         |        |            |
| ATOM | 2787 | CA  | CYS | X | 205 | 44.525 | -61.736 | 54.567 | 1.00172.86 |
| C    |      |     |     |   |     |        |         |        |            |
| ATOM | 2788 | C   | CYS | X | 205 | 43.464 | -62.694 | 54.035 | 1.00170.67 |
| C    |      |     |     |   |     |        |         |        |            |
| ATOM | 2789 | O   | CYS | X | 205 | 43.258 | -63.771 | 54.599 | 1.00159.45 |
| O    |      |     |     |   |     |        |         |        |            |
| ATOM | 2790 | CB  | CYS | X | 205 | 44.212 | -61.373 | 56.014 | 1.00171.09 |
| C    |      |     |     |   |     |        |         |        |            |
| ATOM | 2791 | SG  | CYS | X | 205 | 45.198 | -59.984 | 56.626 | 1.00156.86 |
| S    |      |     |     |   |     |        |         |        |            |
| ATOM | 2792 | N   | GLN | X | 206 | 42.786 | -62.272 | 52.979 | 1.00170.25 |
| N    |      |     |     |   |     |        |         |        |            |
| ATOM | 2793 | CA  | GLN | X | 206 | 41.552 | -62.941 | 52.549 | 1.00190.12 |
| C    |      |     |     |   |     |        |         |        |            |
| ATOM | 2794 | C   | GLN | X | 206 | 41.840 | -64.270 | 51.861 | 1.00227.25 |
| C    |      |     |     |   |     |        |         |        |            |
| ATOM | 2795 | O   | GLN | X | 206 | 41.003 | -65.175 | 51.898 | 1.00257.43 |
| O    |      |     |     |   |     |        |         |        |            |
| ATOM | 2796 | CB  | GLN | X | 206 | 40.710 | -62.034 | 51.626 | 1.00177.02 |
| C    |      |     |     |   |     |        |         |        |            |
| ATOM | 2797 | CG  | GLN | X | 206 | 39.398 | -61.538 | 52.239 | 1.00192.33 |
| C    |      |     |     |   |     |        |         |        |            |
| ATOM | 2798 | CD  | GLN | X | 206 | 38.237 | -62.531 | 52.086 | 1.00205.38 |
| C    |      |     |     |   |     |        |         |        |            |

|      |      |     |     |   |     |        |         |        |            |
|------|------|-----|-----|---|-----|--------|---------|--------|------------|
| ATOM | 2799 | OE1 | GLN | X | 206 | 38.344 | -63.695 | 52.483 | 1.00197.63 |
| O    |      |     |     |   |     |        |         |        |            |
| ATOM | 2800 | NE2 | GLN | X | 206 | 37.102 | -62.054 | 51.567 | 1.00193.08 |
| N    |      |     |     |   |     |        |         |        |            |
| ATOM | 2801 | N   | ILE | X | 207 | 43.029 | -64.399 | 51.266 | 1.00234.15 |
| N    |      |     |     |   |     |        |         |        |            |
| ATOM | 2802 | CA  | ILE | X | 207 | 43.498 | -65.701 | 50.799 | 1.00211.47 |
| C    |      |     |     |   |     |        |         |        |            |
| ATOM | 2803 | C   | ILE | X | 207 | 44.171 | -66.442 | 51.964 | 1.00204.62 |
| C    |      |     |     |   |     |        |         |        |            |
| ATOM | 2804 | O   | ILE | X | 207 | 44.996 | -65.882 | 52.693 | 1.00192.00 |
| O    |      |     |     |   |     |        |         |        |            |
| ATOM | 2805 | CB  | ILE | X | 207 | 44.475 | -65.606 | 49.599 | 1.00178.18 |
| C    |      |     |     |   |     |        |         |        |            |
| ATOM | 2806 | CG1 | ILE | X | 207 | 44.075 | -64.454 | 48.663 | 1.00160.26 |
| C    |      |     |     |   |     |        |         |        |            |
| ATOM | 2807 | CG2 | ILE | X | 207 | 44.500 | -66.937 | 48.846 | 1.00170.60 |
| C    |      |     |     |   |     |        |         |        |            |
| ATOM | 2808 | CD1 | ILE | X | 207 | 44.707 | -64.514 | 47.284 | 1.00158.66 |
| C    |      |     |     |   |     |        |         |        |            |
| ATOM | 2809 | N   | PHE | X | 208 | 43.788 | -67.706 | 52.127 | 1.00188.80 |
| N    |      |     |     |   |     |        |         |        |            |
| ATOM | 2810 | CA  | PHE | X | 208 | 44.438 | -68.613 | 53.079 | 1.00179.66 |
| C    |      |     |     |   |     |        |         |        |            |
| ATOM | 2811 | C   | PHE | X | 208 | 45.271 | -69.690 | 52.365 | 1.00179.40 |
| C    |      |     |     |   |     |        |         |        |            |
| ATOM | 2812 | O   | PHE | X | 208 | 45.013 | -70.010 | 51.192 | 1.00175.68 |
| O    |      |     |     |   |     |        |         |        |            |
| ATOM | 2813 | CB  | PHE | X | 208 | 43.391 | -69.324 | 53.924 | 1.00187.50 |
| C    |      |     |     |   |     |        |         |        |            |
| ATOM | 2814 | CG  | PHE | X | 208 | 42.231 | -68.469 | 54.267 | 1.00185.86 |
| C    |      |     |     |   |     |        |         |        |            |
| ATOM | 2815 | CD1 | PHE | X | 208 | 42.428 | -67.244 | 54.897 | 1.00215.33 |
| C    |      |     |     |   |     |        |         |        |            |
| ATOM | 2816 | CD2 | PHE | X | 208 | 40.948 | -68.857 | 53.937 | 1.00141.08 |
| C    |      |     |     |   |     |        |         |        |            |
| ATOM | 2817 | CE1 | PHE | X | 208 | 41.364 | -66.430 | 55.209 | 1.00203.80 |
| C    |      |     |     |   |     |        |         |        |            |
| ATOM | 2818 | CE2 | PHE | X | 208 | 39.877 | -68.049 | 54.248 | 1.00164.94 |
| C    |      |     |     |   |     |        |         |        |            |
| ATOM | 2819 | CZ  | PHE | X | 208 | 40.084 | -66.832 | 54.884 | 1.00192.05 |
| C    |      |     |     |   |     |        |         |        |            |
| ATOM | 2820 | N   | PRO | X | 209 | 46.236 | -70.301 | 53.089 | 1.00169.86 |
| N    |      |     |     |   |     |        |         |        |            |
| ATOM | 2821 | CA  | PRO | X | 209 | 46.787 | -71.579 | 52.644 | 1.00174.31 |
| C    |      |     |     |   |     |        |         |        |            |
| ATOM | 2822 | C   | PRO | X | 209 | 45.693 | -72.642 | 52.576 | 1.00195.13 |
| C    |      |     |     |   |     |        |         |        |            |
| ATOM | 2823 | O   | PRO | X | 209 | 44.849 | -72.733 | 53.464 | 1.00200.52 |
| O    |      |     |     |   |     |        |         |        |            |
| ATOM | 2824 | CB  | PRO | X | 209 | 47.845 | -71.885 | 53.697 | 1.00147.89 |
| C    |      |     |     |   |     |        |         |        |            |
| ATOM | 2825 | CG  | PRO | X | 209 | 48.361 | -70.534 | 54.067 | 1.00155.59 |
| C    |      |     |     |   |     |        |         |        |            |

|      |      |    |     |   |     |        |         |        |            |
|------|------|----|-----|---|-----|--------|---------|--------|------------|
| ATOM | 2826 | CD | PRO | X | 209 | 47.188 | -69.581 | 53.954 | 1.00155.16 |
| C    |      |    |     |   |     |        |         |        |            |
| ATOM | 2827 | N  | SER | X | 210 | 45.713 | -73.441 | 51.518 | 1.00196.05 |
| N    |      |    |     |   |     |        |         |        |            |
| ATOM | 2828 | CA | SER | X | 210 | 44.608 | -74.357 | 51.227 | 1.00168.67 |
| C    |      |    |     |   |     |        |         |        |            |
| ATOM | 2829 | C  | SER | X | 210 | 44.517 | -75.531 | 52.233 | 1.00168.65 |
| C    |      |    |     |   |     |        |         |        |            |
| ATOM | 2830 | O  | SER | X | 210 | 45.507 | -75.913 | 52.884 | 1.00157.24 |
| O    |      |    |     |   |     |        |         |        |            |
| ATOM | 2831 | CB | SER | X | 210 | 44.701 | -74.883 | 49.799 | 1.00168.45 |
| C    |      |    |     |   |     |        |         |        |            |
| ATOM | 2832 | OG | SER | X | 210 | 43.469 | -74.702 | 49.130 | 1.00155.17 |
| O    |      |    |     |   |     |        |         |        |            |
| ATOM | 2833 | N  | LYS | X | 211 | 43.304 | -76.056 | 52.349 | 1.00172.19 |
| N    |      |    |     |   |     |        |         |        |            |
| ATOM | 2834 | CA | LYS | X | 211 | 42.930 | -77.000 | 53.398 | 1.00196.16 |
| C    |      |    |     |   |     |        |         |        |            |
| ATOM | 2835 | C  | LYS | X | 211 | 43.615 | -78.358 | 53.223 | 1.00188.92 |
| C    |      |    |     |   |     |        |         |        |            |
| ATOM | 2836 | O  | LYS | X | 211 | 43.583 | -78.937 | 52.148 | 1.00154.06 |
| O    |      |    |     |   |     |        |         |        |            |
| ATOM | 2837 | CB | LYS | X | 211 | 41.393 | -77.187 | 53.432 | 1.00203.98 |
| C    |      |    |     |   |     |        |         |        |            |
| ATOM | 2838 | CG | LYS | X | 211 | 40.841 | -78.312 | 52.554 | 1.00180.20 |
| C    |      |    |     |   |     |        |         |        |            |
| ATOM | 2839 | CD | LYS | X | 211 | 39.333 | -78.220 | 52.408 | 1.00154.33 |
| C    |      |    |     |   |     |        |         |        |            |
| ATOM | 2840 | CE | LYS | X | 211 | 38.972 | -77.170 | 51.373 | 1.00154.23 |
| C    |      |    |     |   |     |        |         |        |            |
| ATOM | 2841 | NZ | LYS | X | 211 | 37.508 | -76.992 | 51.260 | 1.00162.43 |
| N1+  |      |    |     |   |     |        |         |        |            |
| ATOM | 2842 | N  | PRO | X | 212 | 44.184 | -78.903 | 54.313 | 1.00205.28 |
| N    |      |    |     |   |     |        |         |        |            |
| ATOM | 2843 | CA | PRO | X | 212 | 44.498 | -80.348 | 54.398 | 1.00223.66 |
| C    |      |    |     |   |     |        |         |        |            |
| ATOM | 2844 | C  | PRO | X | 212 | 43.275 | -81.244 | 54.153 | 1.00240.23 |
| C    |      |    |     |   |     |        |         |        |            |
| ATOM | 2845 | O  | PRO | X | 212 | 42.164 | -80.845 | 54.494 | 1.00269.65 |
| O    |      |    |     |   |     |        |         |        |            |
| ATOM | 2846 | CB | PRO | X | 212 | 44.990 | -80.524 | 55.854 | 1.00200.33 |
| C    |      |    |     |   |     |        |         |        |            |
| ATOM | 2847 | CG | PRO | X | 212 | 44.634 | -79.263 | 56.571 | 1.00172.43 |
| C    |      |    |     |   |     |        |         |        |            |
| ATOM | 2848 | CD | PRO | X | 212 | 44.625 | -78.187 | 55.527 | 1.00182.50 |
| C    |      |    |     |   |     |        |         |        |            |
| ATOM | 2849 | N  | VAL | X | 213 | 43.488 | -82.421 | 53.568 | 1.00234.81 |
| N    |      |    |     |   |     |        |         |        |            |
| ATOM | 2850 | CA | VAL | X | 213 | 42.368 | -83.238 | 53.060 | 1.00215.66 |
| C    |      |    |     |   |     |        |         |        |            |
| ATOM | 2851 | C  | VAL | X | 213 | 41.665 | -84.046 | 54.171 | 1.00206.90 |
| C    |      |    |     |   |     |        |         |        |            |
| ATOM | 2852 | O  | VAL | X | 213 | 42.197 | -83.626 | 55.210 | 1.00206.62 |
| O    |      |    |     |   |     |        |         |        |            |

|      |      |     |     |   |     |        |         |        |            |
|------|------|-----|-----|---|-----|--------|---------|--------|------------|
| ATOM | 2853 | CB  | VAL | X | 213 | 42.788 | -84.141 | 51.861 | 1.00195.78 |
| C    |      |     |     |   |     |        |         |        |            |
| ATOM | 2854 | CG1 | VAL | X | 213 | 43.484 | -83.313 | 50.785 | 1.00173.99 |
| C    |      |     |     |   |     |        |         |        |            |
| ATOM | 2855 | CG2 | VAL | X | 213 | 43.674 | -85.301 | 52.302 | 1.00190.68 |
| C    |      |     |     |   |     |        |         |        |            |
| ATOM | 2856 | N   | SER | X | 214 | 40.683 | -84.935 | 54.016 | 1.00 0.00  |
| N    |      |     |     |   |     |        |         |        |            |
| ATOM | 2857 | CA  | SER | X | 214 | 39.967 | -85.560 | 55.134 | 1.00 0.00  |
| C    |      |     |     |   |     |        |         |        |            |
| ATOM | 2858 | C   | SER | X | 214 | 40.820 | -86.572 | 55.942 | 1.00 0.00  |
| C    |      |     |     |   |     |        |         |        |            |
| ATOM | 2859 | O   | SER | X | 214 | 40.450 | -87.733 | 56.106 | 1.00 0.00  |
| O    |      |     |     |   |     |        |         |        |            |
| ATOM | 2860 | CB  | SER | X | 214 | 38.694 | -86.240 | 54.603 | 1.00 0.00  |
| C    |      |     |     |   |     |        |         |        |            |
| ATOM | 2861 | OG  | SER | X | 214 | 38.992 | -87.267 | 53.677 | 1.00 0.00  |
| O    |      |     |     |   |     |        |         |        |            |
| ATOM | 2862 | N   | ARG | X | 215 | 41.992 | -86.146 | 56.420 | 1.00 0.00  |
| N    |      |     |     |   |     |        |         |        |            |
| ATOM | 2863 | CA  | ARG | X | 215 | 42.926 | -86.966 | 57.184 | 1.00 0.00  |
| C    |      |     |     |   |     |        |         |        |            |
| ATOM | 2864 | C   | ARG | X | 215 | 42.587 | -86.991 | 58.686 | 1.00 0.00  |
| C    |      |     |     |   |     |        |         |        |            |
| ATOM | 2865 | O   | ARG | X | 215 | 42.262 | -85.965 | 59.285 | 1.00 0.00  |
| O    |      |     |     |   |     |        |         |        |            |
| ATOM | 2866 | CB  | ARG | X | 215 | 44.343 | -86.433 | 56.894 | 1.00 0.00  |
| C    |      |     |     |   |     |        |         |        |            |
| ATOM | 2867 | CG  | ARG | X | 215 | 45.488 | -87.233 | 57.534 | 1.00 0.00  |
| C    |      |     |     |   |     |        |         |        |            |
| ATOM | 2868 | CD  | ARG | X | 215 | 45.497 | -88.709 | 57.111 | 1.00 0.00  |
| C    |      |     |     |   |     |        |         |        |            |
| ATOM | 2869 | NE  | ARG | X | 215 | 46.758 | -89.375 | 57.474 | 1.00 0.00  |
| N    |      |     |     |   |     |        |         |        |            |
| ATOM | 2870 | CZ  | ARG | X | 215 | 47.108 | -89.810 | 58.700 | 1.00 0.00  |
| C    |      |     |     |   |     |        |         |        |            |
| ATOM | 2871 | NH1 | ARG | X | 215 | 48.300 | -90.398 | 58.866 | 1.00 0.00  |
| N    |      |     |     |   |     |        |         |        |            |
| ATOM | 2872 | NH2 | ARG | X | 215 | 46.299 | -89.670 | 59.761 | 1.00 0.00  |
| N1+  |      |     |     |   |     |        |         |        |            |
| ATOM | 2873 | N   | GLU | X | 216 | 42.799 | -88.144 | 59.328 | 1.00 0.00  |
| N    |      |     |     |   |     |        |         |        |            |
| ATOM | 2874 | CA  | GLU | X | 216 | 42.452 | -88.396 | 60.733 | 1.00 0.00  |
| C    |      |     |     |   |     |        |         |        |            |
| ATOM | 2875 | C   | GLU | X | 216 | 43.297 | -87.630 | 61.780 | 1.00 0.00  |
| C    |      |     |     |   |     |        |         |        |            |
| ATOM | 2876 | O   | GLU | X | 216 | 43.034 | -87.742 | 62.975 | 1.00 0.00  |
| O    |      |     |     |   |     |        |         |        |            |
| ATOM | 2877 | CB  | GLU | X | 216 | 42.593 | -89.921 | 61.036 | 1.00 0.00  |
| C    |      |     |     |   |     |        |         |        |            |
| ATOM | 2878 | CG  | GLU | X | 216 | 41.575 | -90.788 | 60.276 | 1.00 0.00  |
| C    |      |     |     |   |     |        |         |        |            |
| ATOM | 2879 | CD  | GLU | X | 216 | 41.848 | -90.879 | 58.772 | 1.00 0.00  |
| C    |      |     |     |   |     |        |         |        |            |

|      |      |     |     |   |     |        |         |        |      |        |
|------|------|-----|-----|---|-----|--------|---------|--------|------|--------|
| ATOM | 2880 | OE1 | GLU | X | 216 | 42.857 | -91.398 | 58.294 | 1.00 | 0.00   |
| O    |      |     |     |   |     |        |         |        |      |        |
| ATOM | 2881 | OE2 | GLU | X | 216 | 40.870 | -90.322 | 57.998 | 1.00 | 0.00   |
| O1-  |      |     |     |   |     |        |         |        |      |        |
| ATOM | 2882 | N   | ASP | X | 217 | 44.285 | -86.832 | 61.364 | 1.00 | 0.00   |
| N    |      |     |     |   |     |        |         |        |      |        |
| ATOM | 2883 | CA  | ASP | X | 217 | 45.204 | -86.089 | 62.233 | 1.00 | 0.00   |
| C    |      |     |     |   |     |        |         |        |      |        |
| ATOM | 2884 | C   | ASP | X | 217 | 44.578 | -84.820 | 62.867 | 1.00 | 0.00   |
| C    |      |     |     |   |     |        |         |        |      |        |
| ATOM | 2885 | O   | ASP | X | 217 | 45.193 | -83.756 | 62.869 | 1.00 | 0.00   |
| O    |      |     |     |   |     |        |         |        |      |        |
| ATOM | 2886 | CB  | ASP | X | 217 | 46.479 | -85.665 | 61.410 | 1.00 | 0.00   |
| C    |      |     |     |   |     |        |         |        |      |        |
| ATOM | 2887 | CG  | ASP | X | 217 | 47.676 | -85.149 | 62.218 | 1.00 | 0.00   |
| C    |      |     |     |   |     |        |         |        |      |        |
| ATOM | 2888 | OD1 | ASP | X | 217 | 48.368 | -84.196 | 61.865 | 1.00 | 0.00   |
| O    |      |     |     |   |     |        |         |        |      |        |
| ATOM | 2889 | OD2 | ASP | X | 217 | 47.932 | -85.855 | 63.359 | 1.00 | 0.00   |
| O1-  |      |     |     |   |     |        |         |        |      |        |
| ATOM | 2890 | N   | GLN | X | 218 | 43.323 | -84.911 | 63.329 | 1.00 | 0.00   |
| N    |      |     |     |   |     |        |         |        |      |        |
| ATOM | 2891 | CA  | GLN | X | 218 | 42.530 | -83.816 | 63.910 | 1.00 | 0.00   |
| C    |      |     |     |   |     |        |         |        |      |        |
| ATOM | 2892 | C   | GLN | X | 218 | 42.496 | -82.520 | 63.061 | 1.00 | 0.00   |
| C    |      |     |     |   |     |        |         |        |      |        |
| ATOM | 2893 | O   | GLN | X | 218 | 42.397 | -81.414 | 63.605 | 1.00 | 0.00   |
| O    |      |     |     |   |     |        |         |        |      |        |
| ATOM | 2894 | CB  | GLN | X | 218 | 43.062 | -83.501 | 65.319 | 1.00 | 0.00   |
| C    |      |     |     |   |     |        |         |        |      |        |
| ATOM | 2895 | CG  | GLN | X | 218 | 43.043 | -84.700 | 66.283 | 1.00 | 0.00   |
| C    |      |     |     |   |     |        |         |        |      |        |
| ATOM | 2896 | CD  | GLN | X | 218 | 41.640 | -85.273 | 66.487 | 1.00 | 0.00   |
| C    |      |     |     |   |     |        |         |        |      |        |
| ATOM | 2897 | OE1 | GLN | X | 218 | 41.302 | -86.309 | 65.916 | 1.00 | 0.00   |
| O    |      |     |     |   |     |        |         |        |      |        |
| ATOM | 2898 | NE2 | GLN | X | 218 | 40.817 | -84.594 | 67.290 | 1.00 | 0.00   |
| N    |      |     |     |   |     |        |         |        |      |        |
| ATOM | 2899 | N   | CYS | X | 219 | 42.616 | -82.653 | 61.731 | 1.00 | 0.00   |
| N    |      |     |     |   |     |        |         |        |      |        |
| ATOM | 2900 | CA  | CYS | X | 219 | 42.995 | -81.556 | 60.842 | 1.00 | 0.00   |
| C    |      |     |     |   |     |        |         |        |      |        |
| ATOM | 2901 | C   | CYS | X | 219 | 42.042 | -80.340 | 60.901 | 1.00 | 0.00   |
| C    |      |     |     |   |     |        |         |        |      |        |
| ATOM | 2902 | O   | CYS | X | 219 | 42.520 | -79.227 | 61.101 | 1.00 | 0.00   |
| O    |      |     |     |   |     |        |         |        |      |        |
| ATOM | 2903 | CB  | CYS | X | 219 | 43.037 | -82.051 | 59.375 | 1.00 | 0.00   |
| C    |      |     |     |   |     |        |         |        |      |        |
| ATOM | 2904 | SG  | CYS | X | 219 | 43.740 | -83.718 | 59.227 | 1.00 | 0.00   |
| S    |      |     |     |   |     |        |         |        |      |        |
| ATOM | 2905 | N   | SER | X | 220 | 40.730 | -80.433 | 61.118 | 1.00 | 151.94 |
| N    |      |     |     |   |     |        |         |        |      |        |
| ATOM | 2906 | CA  | SER | X | 220 | 40.029 | -80.950 | 59.936 | 1.00 | 160.83 |
| C    |      |     |     |   |     |        |         |        |      |        |

|      |      |     |     |   |     |        |         |        |            |
|------|------|-----|-----|---|-----|--------|---------|--------|------------|
| ATOM | 2907 | C   | SER | X | 220 | 38.627 | -80.331 | 59.854 | 1.00172.66 |
| C    |      |     |     |   |     |        |         |        |            |
| ATOM | 2908 | O   | SER | X | 220 | 37.943 | -80.399 | 58.822 | 1.00171.88 |
| O    |      |     |     |   |     |        |         |        |            |
| ATOM | 2909 | CB  | SER | X | 220 | 39.939 | -82.489 | 59.980 | 1.00149.17 |
| C    |      |     |     |   |     |        |         |        |            |
| ATOM | 2910 | OG  | SER | X | 220 | 39.411 | -82.955 | 61.212 | 1.00113.74 |
| O    |      |     |     |   |     |        |         |        |            |
| ATOM | 2911 | N   | TYR | X | 221 | 38.215 | -79.723 | 60.972 | 1.00182.04 |
| N    |      |     |     |   |     |        |         |        |            |
| ATOM | 2912 | CA  | TYR | X | 221 | 36.985 | -78.936 | 61.057 | 1.00178.31 |
| C    |      |     |     |   |     |        |         |        |            |
| ATOM | 2913 | C   | TYR | X | 221 | 37.243 | -77.698 | 61.923 | 1.00157.28 |
| C    |      |     |     |   |     |        |         |        |            |
| ATOM | 2914 | O   | TYR | X | 221 | 36.452 | -76.749 | 61.867 | 1.00160.66 |
| O    |      |     |     |   |     |        |         |        |            |
| ATOM | 2915 | CB  | TYR | X | 221 | 35.788 | -79.807 | 61.509 | 1.00186.39 |
| C    |      |     |     |   |     |        |         |        |            |
| ATOM | 2916 | CG  | TYR | X | 221 | 35.305 | -79.613 | 62.921 | 1.00182.15 |
| C    |      |     |     |   |     |        |         |        |            |
| ATOM | 2917 | CD1 | TYR | X | 221 | 34.570 | -78.490 | 63.270 | 1.00165.97 |
| C    |      |     |     |   |     |        |         |        |            |
| ATOM | 2918 | CD2 | TYR | X | 221 | 35.441 | -80.629 | 63.866 | 1.00181.10 |
| C    |      |     |     |   |     |        |         |        |            |
| ATOM | 2919 | CE1 | TYR | X | 221 | 34.095 | -78.321 | 64.551 | 1.00162.08 |
| C    |      |     |     |   |     |        |         |        |            |
| ATOM | 2920 | CE2 | TYR | X | 221 | 34.952 | -80.476 | 65.149 | 1.00171.30 |
| C    |      |     |     |   |     |        |         |        |            |
| ATOM | 2921 | CZ  | TYR | X | 221 | 34.287 | -79.315 | 65.484 | 1.00163.70 |
| C    |      |     |     |   |     |        |         |        |            |
| ATOM | 2922 | OH  | TYR | X | 221 | 33.816 | -79.141 | 66.753 | 1.00159.77 |
| O    |      |     |     |   |     |        |         |        |            |
| ATOM | 2923 | N   | LYS | X | 222 | 38.388 | -77.651 | 62.628 | 1.00141.89 |
| N    |      |     |     |   |     |        |         |        |            |
| ATOM | 2924 | CA  | LYS | X | 222 | 38.937 | -76.395 | 63.154 | 1.00150.42 |
| C    |      |     |     |   |     |        |         |        |            |
| ATOM | 2925 | C   | LYS | X | 222 | 39.272 | -75.465 | 61.988 | 1.00152.01 |
| C    |      |     |     |   |     |        |         |        |            |
| ATOM | 2926 | O   | LYS | X | 222 | 39.156 | -74.232 | 62.099 | 1.00187.54 |
| O    |      |     |     |   |     |        |         |        |            |
| ATOM | 2927 | CB  | LYS | X | 222 | 40.176 | -76.638 | 64.026 | 1.00162.49 |
| C    |      |     |     |   |     |        |         |        |            |
| ATOM | 2928 | CG  | LYS | X | 222 | 41.513 | -76.663 | 63.288 | 1.00168.88 |
| C    |      |     |     |   |     |        |         |        |            |
| ATOM | 2929 | CD  | LYS | X | 222 | 42.694 | -76.623 | 64.256 | 1.00173.40 |
| C    |      |     |     |   |     |        |         |        |            |
| ATOM | 2930 | CE  | LYS | X | 222 | 42.472 | -77.495 | 65.488 | 1.00172.98 |
| C    |      |     |     |   |     |        |         |        |            |
| ATOM | 2931 | NZ  | LYS | X | 222 | 43.716 | -77.662 | 66.287 | 1.00171.90 |
| N1+  |      |     |     |   |     |        |         |        |            |
| ATOM | 2932 | N   | TRP | X | 223 | 39.665 | -76.080 | 60.867 | 1.00134.76 |
| N    |      |     |     |   |     |        |         |        |            |
| ATOM | 2933 | CA  | TRP | X | 223 | 39.920 | -75.351 | 59.634 | 1.00129.70 |
| C    |      |     |     |   |     |        |         |        |            |



|      |      |     |     |   |     |        |         |        |            |
|------|------|-----|-----|---|-----|--------|---------|--------|------------|
| ATOM | 2934 | C   | TRP | X | 223 | 38.704 | -74.552 | 59.193 | 1.00141.84 |
| C    |      |     |     |   |     |        |         |        |            |
| ATOM | 2935 | O   | TRP | X | 223 | 38.851 | -73.452 | 58.676 | 1.00168.59 |
| O    |      |     |     |   |     |        |         |        |            |
| ATOM | 2936 | CB  | TRP | X | 223 | 40.349 | -76.279 | 58.515 | 1.00112.71 |
| C    |      |     |     |   |     |        |         |        |            |
| ATOM | 2937 | CG  | TRP | X | 223 | 40.809 | -75.493 | 57.351 | 1.00133.08 |
| C    |      |     |     |   |     |        |         |        |            |
| ATOM | 2938 | CD1 | TRP | X | 223 | 42.012 | -74.857 | 57.224 | 1.00157.56 |
| C    |      |     |     |   |     |        |         |        |            |
| ATOM | 2939 | CD2 | TRP | X | 223 | 40.017 | -75.076 | 56.228 | 1.00138.46 |
| C    |      |     |     |   |     |        |         |        |            |
| ATOM | 2940 | NE1 | TRP | X | 223 | 42.049 | -74.136 | 56.051 | 1.00170.38 |
| N    |      |     |     |   |     |        |         |        |            |
| ATOM | 2941 | CE2 | TRP | X | 223 | 40.835 | -74.251 | 55.423 | 1.00147.27 |
| C    |      |     |     |   |     |        |         |        |            |
| ATOM | 2942 | CE3 | TRP | X | 223 | 38.709 | -75.353 | 55.803 | 1.00134.25 |
| C    |      |     |     |   |     |        |         |        |            |
| ATOM | 2943 | CZ2 | TRP | X | 223 | 40.393 | -73.709 | 54.217 | 1.00137.51 |
| C    |      |     |     |   |     |        |         |        |            |
| ATOM | 2944 | CZ3 | TRP | X | 223 | 38.269 | -74.807 | 54.607 | 1.00127.74 |
| C    |      |     |     |   |     |        |         |        |            |
| ATOM | 2945 | CH2 | TRP | X | 223 | 39.111 | -73.995 | 53.828 | 1.00135.34 |
| C    |      |     |     |   |     |        |         |        |            |
| ATOM | 2946 | N   | TRP | X | 224 | 37.509 | -75.091 | 59.406 | 1.00138.70 |
| N    |      |     |     |   |     |        |         |        |            |
| ATOM | 2947 | CA  | TRP | X | 224 | 36.284 | -74.380 | 59.061 | 1.00135.45 |
| C    |      |     |     |   |     |        |         |        |            |
| ATOM | 2948 | C   | TRP | X | 224 | 35.915 | -73.334 | 60.079 | 1.00141.79 |
| C    |      |     |     |   |     |        |         |        |            |
| ATOM | 2949 | O   | TRP | X | 224 | 35.304 | -72.328 | 59.736 | 1.00146.49 |
| O    |      |     |     |   |     |        |         |        |            |
| ATOM | 2950 | CB  | TRP | X | 224 | 35.125 | -75.357 | 58.822 | 1.00148.10 |
| C    |      |     |     |   |     |        |         |        |            |
| ATOM | 2951 | CG  | TRP | X | 224 | 35.283 | -76.100 | 57.554 | 1.00128.41 |
| C    |      |     |     |   |     |        |         |        |            |
| ATOM | 2952 | CD1 | TRP | X | 224 | 35.897 | -77.296 | 57.390 | 1.00130.93 |
| C    |      |     |     |   |     |        |         |        |            |
| ATOM | 2953 | CD2 | TRP | X | 224 | 34.962 | -75.629 | 56.245 | 1.00115.37 |
| C    |      |     |     |   |     |        |         |        |            |
| ATOM | 2954 | NE1 | TRP | X | 224 | 35.950 | -77.622 | 56.062 | 1.00140.56 |
| N    |      |     |     |   |     |        |         |        |            |
| ATOM | 2955 | CE2 | TRP | X | 224 | 35.385 | -76.610 | 55.336 | 1.00114.95 |
| C    |      |     |     |   |     |        |         |        |            |
| ATOM | 2956 | CE3 | TRP | X | 224 | 34.356 | -74.470 | 55.753 | 1.00127.38 |
| C    |      |     |     |   |     |        |         |        |            |
| ATOM | 2957 | CZ2 | TRP | X | 224 | 35.203 | -76.485 | 53.967 | 1.00122.21 |
| C    |      |     |     |   |     |        |         |        |            |
| ATOM | 2958 | CZ3 | TRP | X | 224 | 34.177 | -74.343 | 54.388 | 1.00131.89 |
| C    |      |     |     |   |     |        |         |        |            |
| ATOM | 2959 | CH2 | TRP | X | 224 | 34.595 | -75.348 | 53.510 | 1.00128.88 |
| C    |      |     |     |   |     |        |         |        |            |
| ATOM | 2960 | N   | GLN | X | 225 | 36.296 | -73.553 | 61.332 | 1.00163.28 |
| N    |      |     |     |   |     |        |         |        |            |

|      |      |     |     |   |     |        |         |        |            |
|------|------|-----|-----|---|-----|--------|---------|--------|------------|
| ATOM | 2961 | CA  | GLN | X | 225 | 36.133 | -72.513 | 62.332 | 1.00144.05 |
| C    |      |     |     |   |     |        |         |        |            |
| ATOM | 2962 | C   | GLN | X | 225 | 37.117 | -71.394 | 62.052 | 1.00115.19 |
| C    |      |     |     |   |     |        |         |        |            |
| ATOM | 2963 | O   | GLN | X | 225 | 36.769 | -70.213 | 62.184 | 1.00112.87 |
| O    |      |     |     |   |     |        |         |        |            |
| ATOM | 2964 | CB  | GLN | X | 225 | 36.273 | -73.057 | 63.756 | 1.00149.87 |
| C    |      |     |     |   |     |        |         |        |            |
| ATOM | 2965 | CG  | GLN | X | 225 | 34.957 | -73.594 | 64.329 | 1.00168.16 |
| C    |      |     |     |   |     |        |         |        |            |
| ATOM | 2966 | CD  | GLN | X | 225 | 35.070 | -75.012 | 64.875 | 1.00188.61 |
| C    |      |     |     |   |     |        |         |        |            |
| ATOM | 2967 | NE2 | GLN | X | 225 | 34.613 | -75.308 | 65.976 | 1.00187.11 |
| N    |      |     |     |   |     |        |         |        |            |
| ATOM | 2968 | OE1 | GLN | X | 225 | 35.674 | -75.895 | 64.098 | 1.00193.19 |
| O    |      |     |     |   |     |        |         |        |            |
| ATOM | 2969 | N   | LYS | X | 226 | 38.325 | -71.780 | 61.641 | 1.00111.30 |
| N    |      |     |     |   |     |        |         |        |            |
| ATOM | 2970 | CA  | LYS | X | 226 | 39.335 | -70.831 | 61.186 | 1.00121.24 |
| C    |      |     |     |   |     |        |         |        |            |
| ATOM | 2971 | C   | LYS | X | 226 | 38.845 | -70.038 | 59.950 | 1.00118.46 |
| C    |      |     |     |   |     |        |         |        |            |
| ATOM | 2972 | O   | LYS | X | 226 | 38.766 | -68.805 | 59.980 | 1.00121.37 |
| O    |      |     |     |   |     |        |         |        |            |
| ATOM | 2973 | CB  | LYS | X | 226 | 40.661 | -71.578 | 60.817 | 1.00 0.00  |
| C    |      |     |     |   |     |        |         |        |            |
| ATOM | 2974 | CG  | LYS | X | 226 | 41.421 | -71.984 | 62.091 | 1.00 0.00  |
| C    |      |     |     |   |     |        |         |        |            |
| ATOM | 2975 | CD  | LYS | X | 226 | 42.642 | -72.878 | 61.807 | 1.00 0.00  |
| C    |      |     |     |   |     |        |         |        |            |
| ATOM | 2976 | CE  | LYS | X | 226 | 43.658 | -72.306 | 60.807 | 1.00 0.00  |
| C    |      |     |     |   |     |        |         |        |            |
| ATOM | 2977 | NZ  | LYS | X | 226 | 44.201 | -71.005 | 61.239 | 1.00 0.00  |
| N1+  |      |     |     |   |     |        |         |        |            |
| ATOM | 2978 | N   | TYR | X | 227 | 38.500 | -70.773 | 58.892 | 1.00122.58 |
| N    |      |     |     |   |     |        |         |        |            |
| ATOM | 2979 | CA  | TYR | X | 227 | 37.871 | -70.232 | 57.676 | 1.00134.29 |
| C    |      |     |     |   |     |        |         |        |            |
| ATOM | 2980 | C   | TYR | X | 227 | 36.805 | -69.182 | 57.990 | 1.00124.17 |
| C    |      |     |     |   |     |        |         |        |            |
| ATOM | 2981 | O   | TYR | X | 227 | 36.862 | -68.050 | 57.494 | 1.00136.55 |
| O    |      |     |     |   |     |        |         |        |            |
| ATOM | 2982 | CB  | TYR | X | 227 | 37.219 | -71.396 | 56.870 | 1.00131.21 |
| C    |      |     |     |   |     |        |         |        |            |
| ATOM | 2983 | CG  | TYR | X | 227 | 36.654 | -71.005 | 55.502 | 1.00114.84 |
| C    |      |     |     |   |     |        |         |        |            |
| ATOM | 2984 | CD1 | TYR | X | 227 | 37.496 | -70.594 | 54.469 | 1.00113.64 |
| C    |      |     |     |   |     |        |         |        |            |
| ATOM | 2985 | CD2 | TYR | X | 227 | 35.290 | -71.065 | 55.242 | 1.00 97.46 |
| C    |      |     |     |   |     |        |         |        |            |
| ATOM | 2986 | CE1 | TYR | X | 227 | 36.989 | -70.193 | 53.245 | 1.00105.85 |
| C    |      |     |     |   |     |        |         |        |            |
| ATOM | 2987 | CE2 | TYR | X | 227 | 34.780 | -70.668 | 54.020 | 1.00 94.46 |
| C    |      |     |     |   |     |        |         |        |            |

|      |      |     |     |   |     |        |         |        |      |        |
|------|------|-----|-----|---|-----|--------|---------|--------|------|--------|
| ATOM | 2988 | CZ  | TYR | X | 227 | 35.634 | -70.229 | 53.026 | 1.00 | 97.15  |
| C    |      |     |     |   |     |        |         |        |      |        |
| ATOM | 2989 | OH  | TYR | X | 227 | 35.145 | -69.812 | 51.811 | 1.00 | 103.23 |
| O    |      |     |     |   |     |        |         |        |      |        |
| ATOM | 2990 | N   | GLN | X | 228 | 35.834 | -69.569 | 58.814 | 1.00 | 116.60 |
| N    |      |     |     |   |     |        |         |        |      |        |
| ATOM | 2991 | CA  | GLN | X | 228 | 34.741 | -68.670 | 59.190 | 1.00 | 123.80 |
| C    |      |     |     |   |     |        |         |        |      |        |
| ATOM | 2992 | C   | GLN | X | 228 | 35.235 | -67.406 | 59.882 | 1.00 | 106.43 |
| C    |      |     |     |   |     |        |         |        |      |        |
| ATOM | 2993 | O   | GLN | X | 228 | 34.715 | -66.320 | 59.618 | 1.00 | 100.67 |
| O    |      |     |     |   |     |        |         |        |      |        |
| ATOM | 2994 | CB  | GLN | X | 228 | 33.720 | -69.353 | 60.090 | 1.00 | 117.27 |
| C    |      |     |     |   |     |        |         |        |      |        |
| ATOM | 2995 | CG  | GLN | X | 228 | 32.621 | -68.411 | 60.570 | 1.00 | 91.41  |
| C    |      |     |     |   |     |        |         |        |      |        |
| ATOM | 2996 | CD  | GLN | X | 228 | 31.577 | -69.128 | 61.372 | 1.00 | 88.61  |
| C    |      |     |     |   |     |        |         |        |      |        |
| ATOM | 2997 | OE1 | GLN | X | 228 | 30.463 | -69.314 | 60.918 | 1.00 | 80.62  |
| O    |      |     |     |   |     |        |         |        |      |        |
| ATOM | 2998 | NE2 | GLN | X | 228 | 31.960 | -69.613 | 62.542 | 1.00 | 114.00 |
| N    |      |     |     |   |     |        |         |        |      |        |
| ATOM | 2999 | N   | LYS | X | 229 | 36.220 | -67.551 | 60.774 | 1.00 | 103.48 |
| N    |      |     |     |   |     |        |         |        |      |        |
| ATOM | 3000 | CA  | LYS | X | 229 | 36.720 | -66.415 | 61.554 | 1.00 | 102.83 |
| C    |      |     |     |   |     |        |         |        |      |        |
| ATOM | 3001 | C   | LYS | X | 229 | 37.470 | -65.416 | 60.685 | 1.00 | 91.40  |
| C    |      |     |     |   |     |        |         |        |      |        |
| ATOM | 3002 | O   | LYS | X | 229 | 37.373 | -64.215 | 60.926 | 1.00 | 123.01 |
| O    |      |     |     |   |     |        |         |        |      |        |
| ATOM | 3003 | CB  | LYS | X | 229 | 37.675 | -66.914 | 62.682 | 1.00 | 0.00   |
| C    |      |     |     |   |     |        |         |        |      |        |
| ATOM | 3004 | CG  | LYS | X | 229 | 38.301 | -65.836 | 63.583 | 1.00 | 0.00   |
| C    |      |     |     |   |     |        |         |        |      |        |
| ATOM | 3005 | CD  | LYS | X | 229 | 37.273 | -64.983 | 64.342 | 1.00 | 0.00   |
| C    |      |     |     |   |     |        |         |        |      |        |
| ATOM | 3006 | CE  | LYS | X | 229 | 37.996 | -64.004 | 65.273 | 1.00 | 0.00   |
| C    |      |     |     |   |     |        |         |        |      |        |
| ATOM | 3007 | NZ  | LYS | X | 229 | 37.049 | -63.087 | 65.928 | 1.00 | 0.00   |
| N1+  |      |     |     |   |     |        |         |        |      |        |
| ATOM | 3008 | N   | ARG | X | 230 | 38.196 | -65.907 | 59.676 | 1.00 | 82.98  |
| N    |      |     |     |   |     |        |         |        |      |        |
| ATOM | 3009 | CA  | ARG | X | 230 | 39.046 | -65.051 | 58.835 | 1.00 | 90.25  |
| C    |      |     |     |   |     |        |         |        |      |        |
| ATOM | 3010 | C   | ARG | X | 230 | 38.308 | -64.476 | 57.626 | 1.00 | 98.86  |
| C    |      |     |     |   |     |        |         |        |      |        |
| ATOM | 3011 | O   | ARG | X | 230 | 38.520 | -63.324 | 57.269 | 1.00 | 115.63 |
| O    |      |     |     |   |     |        |         |        |      |        |
| ATOM | 3012 | CB  | ARG | X | 230 | 40.276 | -65.853 | 58.375 | 1.00 | 0.00   |
| C    |      |     |     |   |     |        |         |        |      |        |
| ATOM | 3013 | CG  | ARG | X | 230 | 41.195 | -66.262 | 59.539 | 1.00 | 0.00   |
| C    |      |     |     |   |     |        |         |        |      |        |
| ATOM | 3014 | CD  | ARG | X | 230 | 42.419 | -67.046 | 59.049 | 1.00 | 0.00   |
| C    |      |     |     |   |     |        |         |        |      |        |

|      |      |     |     |   |     |        |         |        |      |        |
|------|------|-----|-----|---|-----|--------|---------|--------|------|--------|
| ATOM | 3015 | NE  | ARG | X | 230 | 42.042 | -68.349 | 58.480 | 1.00 | 0.00   |
| N    |      |     |     |   |     |        |         |        |      |        |
| ATOM | 3016 | CZ  | ARG | X | 230 | 42.885 | -69.223 | 57.901 | 1.00 | 0.00   |
| C    |      |     |     |   |     |        |         |        |      |        |
| ATOM | 3017 | NH1 | ARG | X | 230 | 42.394 | -70.368 | 57.407 | 1.00 | 0.00   |
| N    |      |     |     |   |     |        |         |        |      |        |
| ATOM | 3018 | NH2 | ARG | X | 230 | 44.201 | -68.977 | 57.807 | 1.00 | 0.00   |
| N1+  |      |     |     |   |     |        |         |        |      |        |
| ATOM | 3019 | N   | LYS | X | 231 | 37.446 | -65.275 | 56.997 | 1.00 | 109.74 |
| N    |      |     |     |   |     |        |         |        |      |        |
| ATOM | 3020 | CA  | LYS | X | 231 | 36.696 | -64.821 | 55.826 | 1.00 | 112.19 |
| C    |      |     |     |   |     |        |         |        |      |        |
| ATOM | 3021 | C   | LYS | X | 231 | 35.628 | -63.778 | 56.161 | 1.00 | 93.82  |
| C    |      |     |     |   |     |        |         |        |      |        |
| ATOM | 3022 | O   | LYS | X | 231 | 35.470 | -62.782 | 55.456 | 1.00 | 88.97  |
| O    |      |     |     |   |     |        |         |        |      |        |
| ATOM | 3023 | CB  | LYS | X | 231 | 36.006 | -65.999 | 55.131 | 1.00 | 128.65 |
| C    |      |     |     |   |     |        |         |        |      |        |
| ATOM | 3024 | CG  | LYS | X | 231 | 35.425 | -65.651 | 53.760 | 1.00 | 145.37 |
| C    |      |     |     |   |     |        |         |        |      |        |
| ATOM | 3025 | CD  | LYS | X | 231 | 35.226 | -66.887 | 52.886 | 1.00 | 136.47 |
| C    |      |     |     |   |     |        |         |        |      |        |
| ATOM | 3026 | CE  | LYS | X | 231 | 34.789 | -66.521 | 51.475 | 1.00 | 137.78 |
| C    |      |     |     |   |     |        |         |        |      |        |
| ATOM | 3027 | NZ  | LYS | X | 231 | 34.363 | -67.719 | 50.697 | 1.00 | 139.18 |
| N1+  |      |     |     |   |     |        |         |        |      |        |
| ATOM | 3028 | N   | PHE | X | 232 | 34.895 | -64.018 | 57.231 | 1.00 | 89.80  |
| N    |      |     |     |   |     |        |         |        |      |        |
| ATOM | 3029 | CA  | PHE | X | 232 | 33.782 | -63.153 | 57.603 | 1.00 | 102.44 |
| C    |      |     |     |   |     |        |         |        |      |        |
| ATOM | 3030 | C   | PHE | X | 232 | 34.133 | -62.244 | 58.746 | 1.00 | 126.59 |
| C    |      |     |     |   |     |        |         |        |      |        |
| ATOM | 3031 | O   | PHE | X | 232 | 33.256 | -61.846 | 59.524 | 1.00 | 111.34 |
| O    |      |     |     |   |     |        |         |        |      |        |
| ATOM | 3032 | CB  | PHE | X | 232 | 32.596 | -63.983 | 57.976 | 1.00 | 111.33 |
| C    |      |     |     |   |     |        |         |        |      |        |
| ATOM | 3033 | CG  | PHE | X | 232 | 32.100 | -64.810 | 56.869 | 1.00 | 92.88  |
| C    |      |     |     |   |     |        |         |        |      |        |
| ATOM | 3034 | CD1 | PHE | X | 232 | 31.763 | -64.226 | 55.683 | 1.00 | 74.74  |
| C    |      |     |     |   |     |        |         |        |      |        |
| ATOM | 3035 | CD2 | PHE | X | 232 | 31.981 | -66.182 | 57.016 | 1.00 | 90.06  |
| C    |      |     |     |   |     |        |         |        |      |        |
| ATOM | 3036 | CE1 | PHE | X | 232 | 31.278 | -64.983 | 54.664 | 1.00 | 81.30  |
| C    |      |     |     |   |     |        |         |        |      |        |
| ATOM | 3037 | CE2 | PHE | X | 232 | 31.483 | -66.948 | 56.010 | 1.00 | 70.02  |
| C    |      |     |     |   |     |        |         |        |      |        |
| ATOM | 3038 | CZ  | PHE | X | 232 | 31.142 | -66.347 | 54.826 | 1.00 | 87.80  |
| C    |      |     |     |   |     |        |         |        |      |        |
| ATOM | 3039 | N   | HID | X | 233 | 35.402 | -61.868 | 58.830 | 1.00 | 141.50 |
| N    |      |     |     |   |     |        |         |        |      |        |
| ATOM | 3040 | CA  | HID | X | 233 | 35.856 | -61.012 | 59.910 | 1.00 | 120.01 |
| C    |      |     |     |   |     |        |         |        |      |        |
| ATOM | 3041 | C   | HID | X | 233 | 35.085 | -59.707 | 59.966 | 1.00 | 104.06 |
| C    |      |     |     |   |     |        |         |        |      |        |

|      |      |     |     |   |     |        |         |        |            |
|------|------|-----|-----|---|-----|--------|---------|--------|------------|
| ATOM | 3042 | O   | HID | X | 233 | 34.614 | -59.279 | 61.032 | 1.00135.27 |
| O    |      |     |     |   |     |        |         |        |            |
| ATOM | 3043 | CB  | HID | X | 233 | 37.341 | -60.705 | 59.756 | 1.00119.07 |
| C    |      |     |     |   |     |        |         |        |            |
| ATOM | 3044 | CG  | HID | X | 233 | 37.859 | -59.750 | 60.780 | 1.00132.43 |
| C    |      |     |     |   |     |        |         |        |            |
| ATOM | 3045 | ND1 | HID | X | 233 | 37.743 | -58.382 | 60.646 | 1.00154.13 |
| N    |      |     |     |   |     |        |         |        |            |
| ATOM | 3046 | CD2 | HID | X | 233 | 38.441 | -59.963 | 61.984 | 1.00140.53 |
| C    |      |     |     |   |     |        |         |        |            |
| ATOM | 3047 | CE1 | HID | X | 233 | 38.254 | -57.793 | 61.711 | 1.00168.58 |
| C    |      |     |     |   |     |        |         |        |            |
| ATOM | 3048 | NE2 | HID | X | 233 | 38.691 | -58.729 | 62.536 | 1.00173.90 |
| N    |      |     |     |   |     |        |         |        |            |
| ATOM | 3049 | N   | CYS | X | 234 | 34.931 | -59.089 | 58.805 | 1.00 96.64 |
| N    |      |     |     |   |     |        |         |        |            |
| ATOM | 3050 | CA  | CYS | X | 234 | 34.322 | -57.755 | 58.718 | 1.00103.76 |
| C    |      |     |     |   |     |        |         |        |            |
| ATOM | 3051 | C   | CYS | X | 234 | 32.802 | -57.738 | 58.892 | 1.00 81.77 |
| C    |      |     |     |   |     |        |         |        |            |
| ATOM | 3052 | O   | CYS | X | 234 | 32.155 | -56.731 | 58.575 | 1.00 76.71 |
| O    |      |     |     |   |     |        |         |        |            |
| ATOM | 3053 | CB  | CYS | X | 234 | 34.711 | -57.088 | 57.396 | 1.00125.43 |
| C    |      |     |     |   |     |        |         |        |            |
| ATOM | 3054 | SG  | CYS | X | 234 | 36.446 | -56.596 | 57.340 | 1.00143.94 |
| S    |      |     |     |   |     |        |         |        |            |
| ATOM | 3055 | N   | ALA | X | 235 | 32.228 | -58.842 | 59.368 | 1.00 71.83 |
| N    |      |     |     |   |     |        |         |        |            |
| ATOM | 3056 | CA  | ALA | X | 235 | 30.829 | -58.873 | 59.765 | 1.00 82.80 |
| C    |      |     |     |   |     |        |         |        |            |
| ATOM | 3057 | C   | ALA | X | 235 | 30.563 | -57.799 | 60.791 | 1.00 82.66 |
| C    |      |     |     |   |     |        |         |        |            |
| ATOM | 3058 | O   | ALA | X | 235 | 29.464 | -57.238 | 60.853 | 1.00 78.22 |
| O    |      |     |     |   |     |        |         |        |            |
| ATOM | 3059 | CB  | ALA | X | 235 | 30.485 | -60.233 | 60.353 | 1.00 83.41 |
| C    |      |     |     |   |     |        |         |        |            |
| ATOM | 3060 | N   | ASN | X | 236 | 31.590 | -57.495 | 61.590 | 1.00 89.20 |
| N    |      |     |     |   |     |        |         |        |            |
| ATOM | 3061 | CA  | ASN | X | 236 | 31.440 | -56.525 | 62.654 | 1.00 90.18 |
| C    |      |     |     |   |     |        |         |        |            |
| ATOM | 3062 | C   | ASN | X | 236 | 31.089 | -55.138 | 62.151 | 1.00 76.62 |
| C    |      |     |     |   |     |        |         |        |            |
| ATOM | 3063 | O   | ASN | X | 236 | 30.605 | -54.312 | 62.927 | 1.00 79.90 |
| O    |      |     |     |   |     |        |         |        |            |
| ATOM | 3064 | CB  | ASN | X | 236 | 32.651 | -56.501 | 63.613 | 1.00100.74 |
| C    |      |     |     |   |     |        |         |        |            |
| ATOM | 3065 | CG  | ASN | X | 236 | 33.994 | -56.685 | 62.908 | 1.00104.32 |
| C    |      |     |     |   |     |        |         |        |            |
| ATOM | 3066 | OD1 | ASN | X | 236 | 34.466 | -55.808 | 62.186 | 1.00113.30 |
| O    |      |     |     |   |     |        |         |        |            |
| ATOM | 3067 | ND2 | ASN | X | 236 | 34.672 | -57.772 | 63.229 | 1.00130.26 |
| N    |      |     |     |   |     |        |         |        |            |
| ATOM | 3068 | N   | LEU | X | 237 | 31.299 | -54.917 | 60.847 | 1.00 64.87 |
| N    |      |     |     |   |     |        |         |        |            |

|      |      |     |     |   |     |        |         |        |      |        |
|------|------|-----|-----|---|-----|--------|---------|--------|------|--------|
| ATOM | 3069 | CA  | LEU | X | 237 | 30.972 | -53.661 | 60.166 | 1.00 | 63.15  |
| C    |      |     |     |   |     |        |         |        |      |        |
| ATOM | 3070 | C   | LEU | X | 237 | 29.523 | -53.665 | 59.707 | 1.00 | 65.01  |
| C    |      |     |     |   |     |        |         |        |      |        |
| ATOM | 3071 | O   | LEU | X | 237 | 28.968 | -52.630 | 59.325 | 1.00 | 59.04  |
| O    |      |     |     |   |     |        |         |        |      |        |
| ATOM | 3072 | CB  | LEU | X | 237 | 31.859 | -53.463 | 58.964 | 1.00 | 58.36  |
| C    |      |     |     |   |     |        |         |        |      |        |
| ATOM | 3073 | CG  | LEU | X | 237 | 33.362 | -53.452 | 59.130 | 1.00 | 61.16  |
| C    |      |     |     |   |     |        |         |        |      |        |
| ATOM | 3074 | CD1 | LEU | X | 237 | 33.865 | -52.151 | 58.542 | 1.00 | 73.42  |
| C    |      |     |     |   |     |        |         |        |      |        |
| ATOM | 3075 | CD2 | LEU | X | 237 | 33.804 | -53.573 | 60.571 | 1.00 | 68.09  |
| C    |      |     |     |   |     |        |         |        |      |        |
| ATOM | 3076 | N   | THR | X | 238 | 28.918 | -54.850 | 59.740 | 1.00 | 65.28  |
| N    |      |     |     |   |     |        |         |        |      |        |
| ATOM | 3077 | CA  | THR | X | 238 | 27.562 | -55.047 | 59.274 | 1.00 | 77.89  |
| C    |      |     |     |   |     |        |         |        |      |        |
| ATOM | 3078 | C   | THR | X | 238 | 26.678 | -55.343 | 60.450 | 1.00 | 73.23  |
| C    |      |     |     |   |     |        |         |        |      |        |
| ATOM | 3079 | O   | THR | X | 238 | 27.094 | -55.282 | 61.570 | 1.00 | 92.07  |
| O    |      |     |     |   |     |        |         |        |      |        |
| ATOM | 3080 | CB  | THR | X | 238 | 27.415 | -56.264 | 58.343 | 1.00 | 109.75 |
| C    |      |     |     |   |     |        |         |        |      |        |
| ATOM | 3081 | OG1 | THR | X | 238 | 26.809 | -57.348 | 59.065 | 1.00 | 144.77 |
| O    |      |     |     |   |     |        |         |        |      |        |
| ATOM | 3082 | CG2 | THR | X | 238 | 28.742 | -56.706 | 57.773 | 1.00 | 112.02 |
| C    |      |     |     |   |     |        |         |        |      |        |
| ATOM | 3083 | N   | SER | X | 239 | 25.443 | -55.710 | 60.171 | 1.00 | 75.32  |
| N    |      |     |     |   |     |        |         |        |      |        |
| ATOM | 3084 | CA  | SER | X | 239 | 24.476 | -55.982 | 61.222 | 1.00 | 75.55  |
| C    |      |     |     |   |     |        |         |        |      |        |
| ATOM | 3085 | C   | SER | X | 239 | 24.163 | -57.478 | 61.352 | 1.00 | 72.63  |
| C    |      |     |     |   |     |        |         |        |      |        |
| ATOM | 3086 | O   | SER | X | 239 | 23.040 | -57.859 | 61.738 | 1.00 | 83.64  |
| O    |      |     |     |   |     |        |         |        |      |        |
| ATOM | 3087 | CB  | SER | X | 239 | 23.175 | -55.193 | 60.968 | 1.00 | 81.40  |
| C    |      |     |     |   |     |        |         |        |      |        |
| ATOM | 3088 | OG  | SER | X | 239 | 22.819 | -55.163 | 59.593 | 1.00 | 83.39  |
| O    |      |     |     |   |     |        |         |        |      |        |
| ATOM | 3089 | N   | TRP | X | 240 | 25.097 | -58.342 | 60.983 | 1.00 | 75.46  |
| N    |      |     |     |   |     |        |         |        |      |        |
| ATOM | 3090 | CA  | TRP | X | 240 | 24.956 | -59.779 | 61.275 | 1.00 | 78.76  |
| C    |      |     |     |   |     |        |         |        |      |        |
| ATOM | 3091 | C   | TRP | X | 240 | 26.220 | -60.497 | 61.732 | 1.00 | 77.92  |
| C    |      |     |     |   |     |        |         |        |      |        |
| ATOM | 3092 | O   | TRP | X | 240 | 27.325 | -59.996 | 61.569 | 1.00 | 75.40  |
| O    |      |     |     |   |     |        |         |        |      |        |
| ATOM | 3093 | CB  | TRP | X | 240 | 24.329 | -60.477 | 60.080 | 1.00 | 75.95  |
| C    |      |     |     |   |     |        |         |        |      |        |
| ATOM | 3094 | CG  | TRP | X | 240 | 22.887 | -60.457 | 60.161 | 1.00 | 76.00  |
| C    |      |     |     |   |     |        |         |        |      |        |
| ATOM | 3095 | CD1 | TRP | X | 240 | 22.109 | -60.999 | 61.144 | 1.00 | 88.18  |
| C    |      |     |     |   |     |        |         |        |      |        |

|      |      |     |     |   |     |        |         |        |      |        |
|------|------|-----|-----|---|-----|--------|---------|--------|------|--------|
| ATOM | 3096 | CD2 | TRP | X | 240 | 22.017 | -59.788 | 59.290 | 1.00 | 77.19  |
| C    |      |     |     |   |     |        |         |        |      |        |
| ATOM | 3097 | NE1 | TRP | X | 240 | 20.790 | -60.743 | 60.904 | 1.00 | 86.70  |
| N    |      |     |     |   |     |        |         |        |      |        |
| ATOM | 3098 | CE2 | TRP | X | 240 | 20.703 | -59.989 | 59.772 | 1.00 | 82.02  |
| C    |      |     |     |   |     |        |         |        |      |        |
| ATOM | 3099 | CE3 | TRP | X | 240 | 22.203 | -59.070 | 58.119 | 1.00 | 84.58  |
| C    |      |     |     |   |     |        |         |        |      |        |
| ATOM | 3100 | CZ2 | TRP | X | 240 | 19.603 | -59.503 | 59.131 | 1.00 | 89.61  |
| C    |      |     |     |   |     |        |         |        |      |        |
| ATOM | 3101 | CZ3 | TRP | X | 240 | 21.117 | -58.601 | 57.477 | 1.00 | 103.34 |
| C    |      |     |     |   |     |        |         |        |      |        |
| ATOM | 3102 | CH2 | TRP | X | 240 | 19.814 | -58.826 | 57.979 | 1.00 | 105.62 |
| C    |      |     |     |   |     |        |         |        |      |        |
| ATOM | 3103 | N   | PRO | X | 241 | 26.061 | -61.712 | 62.293 | 1.00 | 75.68  |
| N    |      |     |     |   |     |        |         |        |      |        |
| ATOM | 3104 | CA  | PRO | X | 241 | 27.212 | -62.490 | 62.741 | 1.00 | 76.19  |
| C    |      |     |     |   |     |        |         |        |      |        |
| ATOM | 3105 | C   | PRO | X | 241 | 27.930 | -63.253 | 61.630 | 1.00 | 73.33  |
| C    |      |     |     |   |     |        |         |        |      |        |
| ATOM | 3106 | O   | PRO | X | 241 | 27.361 | -63.482 | 60.585 | 1.00 | 84.30  |
| O    |      |     |     |   |     |        |         |        |      |        |
| ATOM | 3107 | CB  | PRO | X | 241 | 26.598 | -63.484 | 63.726 | 1.00 | 83.22  |
| C    |      |     |     |   |     |        |         |        |      |        |
| ATOM | 3108 | CG  | PRO | X | 241 | 25.185 | -63.635 | 63.306 | 1.00 | 76.64  |
| C    |      |     |     |   |     |        |         |        |      |        |
| ATOM | 3109 | CD  | PRO | X | 241 | 24.785 | -62.308 | 62.736 | 1.00 | 76.09  |
| C    |      |     |     |   |     |        |         |        |      |        |
| ATOM | 3110 | N   | ARG | X | 242 | 29.158 | -63.669 | 61.916 | 1.00 | 84.46  |
| N    |      |     |     |   |     |        |         |        |      |        |
| ATOM | 3111 | CA  | ARG | X | 242 | 29.958 | -64.553 | 61.032 | 1.00 | 86.24  |
| C    |      |     |     |   |     |        |         |        |      |        |
| ATOM | 3112 | C   | ARG | X | 242 | 29.189 | -65.794 | 60.608 | 1.00 | 63.52  |
| C    |      |     |     |   |     |        |         |        |      |        |
| ATOM | 3113 | O   | ARG | X | 242 | 29.169 | -66.136 | 59.430 | 1.00 | 69.22  |
| O    |      |     |     |   |     |        |         |        |      |        |
| ATOM | 3114 | CB  | ARG | X | 242 | 31.275 | -64.933 | 61.725 | 1.00 | 101.02 |
| C    |      |     |     |   |     |        |         |        |      |        |
| ATOM | 3115 | CG  | ARG | X | 242 | 32.109 | -63.702 | 62.079 | 1.00 | 113.81 |
| C    |      |     |     |   |     |        |         |        |      |        |
| ATOM | 3116 | CD  | ARG | X | 242 | 33.541 | -64.014 | 62.454 | 1.00 | 121.71 |
| C    |      |     |     |   |     |        |         |        |      |        |
| ATOM | 3117 | NE  | ARG | X | 242 | 33.727 | -63.929 | 63.899 | 1.00 | 141.69 |
| N    |      |     |     |   |     |        |         |        |      |        |
| ATOM | 3118 | CZ  | ARG | X | 242 | 33.484 | -64.920 | 64.756 | 1.00 | 157.88 |
| C    |      |     |     |   |     |        |         |        |      |        |
| ATOM | 3119 | NH1 | ARG | X | 242 | 33.081 | -66.110 | 64.324 | 1.00 | 146.30 |
| N    |      |     |     |   |     |        |         |        |      |        |
| ATOM | 3120 | NH2 | ARG | X | 242 | 33.661 | -64.720 | 66.057 | 1.00 | 179.80 |
| N1+  |      |     |     |   |     |        |         |        |      |        |
| ATOM | 3121 | N   | TRP | X | 243 | 28.533 | -66.441 | 61.570 | 1.00 | 75.25  |
| N    |      |     |     |   |     |        |         |        |      |        |
| ATOM | 3122 | CA  | TRP | X | 243 | 27.831 | -67.717 | 61.335 | 1.00 | 89.10  |
| C    |      |     |     |   |     |        |         |        |      |        |

|      |      |     |     |   |     |        |         |        |      |        |
|------|------|-----|-----|---|-----|--------|---------|--------|------|--------|
| ATOM | 3123 | C   | TRP | X | 243 | 26.614 | -67.585 | 60.450 | 1.00 | 82.55  |
| C    |      |     |     |   |     |        |         |        |      |        |
| ATOM | 3124 | O   | TRP | X | 243 | 26.120 | -68.600 | 59.933 | 1.00 | 96.98  |
| O    |      |     |     |   |     |        |         |        |      |        |
| ATOM | 3125 | CB  | TRP | X | 243 | 27.405 | -68.411 | 62.656 | 1.00 | 97.53  |
| C    |      |     |     |   |     |        |         |        |      |        |
| ATOM | 3126 | CG  | TRP | X | 243 | 26.466 | -67.600 | 63.515 | 1.00 | 72.06  |
| C    |      |     |     |   |     |        |         |        |      |        |
| ATOM | 3127 | CD1 | TRP | X | 243 | 26.811 | -66.816 | 64.541 | 1.00 | 69.43  |
| C    |      |     |     |   |     |        |         |        |      |        |
| ATOM | 3128 | CD2 | TRP | X | 243 | 25.049 | -67.497 | 63.395 | 1.00 | 61.69  |
| C    |      |     |     |   |     |        |         |        |      |        |
| ATOM | 3129 | NE1 | TRP | X | 243 | 25.723 | -66.164 | 65.026 | 1.00 | 69.64  |
| N    |      |     |     |   |     |        |         |        |      |        |
| ATOM | 3130 | CE2 | TRP | X | 243 | 24.620 | -66.579 | 64.345 | 1.00 | 61.81  |
| C    |      |     |     |   |     |        |         |        |      |        |
| ATOM | 3131 | CE3 | TRP | X | 243 | 24.112 | -68.072 | 62.559 | 1.00 | 76.24  |
| C    |      |     |     |   |     |        |         |        |      |        |
| ATOM | 3132 | CZ2 | TRP | X | 243 | 23.282 | -66.253 | 64.524 | 1.00 | 70.84  |
| C    |      |     |     |   |     |        |         |        |      |        |
| ATOM | 3133 | CZ3 | TRP | X | 243 | 22.778 | -67.724 | 62.720 | 1.00 | 80.65  |
| C    |      |     |     |   |     |        |         |        |      |        |
| ATOM | 3134 | CH2 | TRP | X | 243 | 22.378 | -66.854 | 63.716 | 1.00 | 72.09  |
| C    |      |     |     |   |     |        |         |        |      |        |
| ATOM | 3135 | N   | LEU | X | 244 | 26.126 | -66.357 | 60.260 | 1.00 | 71.75  |
| N    |      |     |     |   |     |        |         |        |      |        |
| ATOM | 3136 | CA  | LEU | X | 244 | 25.025 | -66.166 | 59.318 | 1.00 | 75.71  |
| C    |      |     |     |   |     |        |         |        |      |        |
| ATOM | 3137 | C   | LEU | X | 244 | 25.546 | -66.038 | 57.913 | 1.00 | 84.39  |
| C    |      |     |     |   |     |        |         |        |      |        |
| ATOM | 3138 | O   | LEU | X | 244 | 25.148 | -66.776 | 57.026 | 1.00 | 111.92 |
| O    |      |     |     |   |     |        |         |        |      |        |
| ATOM | 3139 | CB  | LEU | X | 244 | 24.142 | -65.021 | 59.664 | 1.00 | 78.92  |
| C    |      |     |     |   |     |        |         |        |      |        |
| ATOM | 3140 | CG  | LEU | X | 244 | 22.951 | -65.117 | 58.722 | 1.00 | 73.17  |
| C    |      |     |     |   |     |        |         |        |      |        |
| ATOM | 3141 | CD1 | LEU | X | 244 | 21.654 | -65.291 | 59.500 | 1.00 | 70.48  |
| C    |      |     |     |   |     |        |         |        |      |        |
| ATOM | 3142 | CD2 | LEU | X | 244 | 22.944 | -63.893 | 57.819 | 1.00 | 73.98  |
| C    |      |     |     |   |     |        |         |        |      |        |
| ATOM | 3143 | N   | TYR | X | 245 | 26.455 | -65.099 | 57.716 | 1.00 | 83.66  |
| N    |      |     |     |   |     |        |         |        |      |        |
| ATOM | 3144 | CA  | TYR | X | 245 | 27.107 | -64.937 | 56.440 | 1.00 | 81.12  |
| C    |      |     |     |   |     |        |         |        |      |        |
| ATOM | 3145 | C   | TYR | X | 245 | 27.663 | -66.296 | 55.972 | 1.00 | 75.67  |
| C    |      |     |     |   |     |        |         |        |      |        |
| ATOM | 3146 | O   | TYR | X | 245 | 27.825 | -66.543 | 54.773 | 1.00 | 91.65  |
| O    |      |     |     |   |     |        |         |        |      |        |
| ATOM | 3147 | CB  | TYR | X | 245 | 28.210 | -63.891 | 56.536 | 1.00 | 73.15  |
| C    |      |     |     |   |     |        |         |        |      |        |
| ATOM | 3148 | CG  | TYR | X | 245 | 27.680 | -62.490 | 56.579 | 1.00 | 74.75  |
| C    |      |     |     |   |     |        |         |        |      |        |
| ATOM | 3149 | CD1 | TYR | X | 245 | 27.304 | -61.843 | 55.427 | 1.00 | 90.46  |
| C    |      |     |     |   |     |        |         |        |      |        |



|      |      |     |     |   |     |        |         |        |      |        |
|------|------|-----|-----|---|-----|--------|---------|--------|------|--------|
| ATOM | 3150 | CD2 | TYR | X | 245 | 27.499 | -61.834 | 57.767 | 1.00 | 93.56  |
| C    |      |     |     |   |     |        |         |        |      |        |
| ATOM | 3151 | CE1 | TYR | X | 245 | 26.813 | -60.544 | 55.447 | 1.00 | 93.54  |
| C    |      |     |     |   |     |        |         |        |      |        |
| ATOM | 3152 | CE2 | TYR | X | 245 | 26.990 | -60.538 | 57.808 | 1.00 | 108.23 |
| C    |      |     |     |   |     |        |         |        |      |        |
| ATOM | 3153 | CZ  | TYR | X | 245 | 26.647 | -59.895 | 56.641 | 1.00 | 91.81  |
| C    |      |     |     |   |     |        |         |        |      |        |
| ATOM | 3154 | OH  | TYR | X | 245 | 26.137 | -58.605 | 56.671 | 1.00 | 88.76  |
| O    |      |     |     |   |     |        |         |        |      |        |
| ATOM | 3155 | N   | SER | X | 246 | 27.910 | -67.181 | 56.928 | 1.00 | 77.53  |
| N    |      |     |     |   |     |        |         |        |      |        |
| ATOM | 3156 | CA  | SER | X | 246 | 28.413 | -68.498 | 56.609 | 1.00 | 76.59  |
| C    |      |     |     |   |     |        |         |        |      |        |
| ATOM | 3157 | C   | SER | X | 246 | 27.353 | -69.348 | 55.955 | 1.00 | 83.93  |
| C    |      |     |     |   |     |        |         |        |      |        |
| ATOM | 3158 | O   | SER | X | 246 | 27.670 | -70.139 | 55.094 | 1.00 | 88.44  |
| O    |      |     |     |   |     |        |         |        |      |        |
| ATOM | 3159 | CB  | SER | X | 246 | 29.084 | -69.225 | 57.772 | 1.00 | 94.79  |
| C    |      |     |     |   |     |        |         |        |      |        |
| ATOM | 3160 | OG  | SER | X | 246 | 30.259 | -69.904 | 57.315 | 1.00 | 79.89  |
| O    |      |     |     |   |     |        |         |        |      |        |
| ATOM | 3161 | N   | LEU | X | 247 | 26.092 | -69.137 | 56.302 | 1.00 | 94.26  |
| N    |      |     |     |   |     |        |         |        |      |        |
| ATOM | 3162 | CA  | LEU | X | 247 | 24.952 | -69.840 | 55.679 | 1.00 | 91.33  |
| C    |      |     |     |   |     |        |         |        |      |        |
| ATOM | 3163 | C   | LEU | X | 247 | 24.629 | -69.400 | 54.242 | 1.00 | 82.19  |
| C    |      |     |     |   |     |        |         |        |      |        |
| ATOM | 3164 | O   | LEU | X | 247 | 23.636 | -69.822 | 53.679 | 1.00 | 78.33  |
| O    |      |     |     |   |     |        |         |        |      |        |
| ATOM | 3165 | CB  | LEU | X | 247 | 23.674 | -69.561 | 56.462 | 1.00 | 89.73  |
| C    |      |     |     |   |     |        |         |        |      |        |
| ATOM | 3166 | CG  | LEU | X | 247 | 23.627 | -69.831 | 57.942 | 1.00 | 98.11  |
| C    |      |     |     |   |     |        |         |        |      |        |
| ATOM | 3167 | CD1 | LEU | X | 247 | 22.163 | -69.950 | 58.332 | 1.00 | 97.82  |
| C    |      |     |     |   |     |        |         |        |      |        |
| ATOM | 3168 | CD2 | LEU | X | 247 | 24.411 | -71.092 | 58.302 | 1.00 | 104.27 |
| C    |      |     |     |   |     |        |         |        |      |        |
| ATOM | 3169 | N   | TYR | X | 248 | 25.374 | -68.437 | 53.711 | 1.00 | 75.52  |
| N    |      |     |     |   |     |        |         |        |      |        |
| ATOM | 3170 | CA  | TYR | X | 248 | 25.248 | -68.029 | 52.291 | 1.00 | 67.80  |
| C    |      |     |     |   |     |        |         |        |      |        |
| ATOM | 3171 | C   | TYR | X | 248 | 26.589 | -68.117 | 51.543 | 1.00 | 79.47  |
| C    |      |     |     |   |     |        |         |        |      |        |
| ATOM | 3172 | O   | TYR | X | 248 | 26.804 | -67.491 | 50.501 | 1.00 | 96.84  |
| O    |      |     |     |   |     |        |         |        |      |        |
| ATOM | 3173 | CB  | TYR | X | 248 | 24.628 | -66.637 | 52.212 | 1.00 | 63.42  |
| C    |      |     |     |   |     |        |         |        |      |        |
| ATOM | 3174 | CG  | TYR | X | 248 | 23.191 | -66.545 | 52.741 | 1.00 | 64.96  |
| C    |      |     |     |   |     |        |         |        |      |        |
| ATOM | 3175 | CD1 | TYR | X | 248 | 22.904 | -66.694 | 54.083 | 1.00 | 78.13  |
| C    |      |     |     |   |     |        |         |        |      |        |
| ATOM | 3176 | CD2 | TYR | X | 248 | 22.168 | -66.140 | 51.926 | 1.00 | 80.23  |
| C    |      |     |     |   |     |        |         |        |      |        |

|      |      |     |     |   |     |        |         |        |      |        |
|------|------|-----|-----|---|-----|--------|---------|--------|------|--------|
| ATOM | 3177 | CE1 | TYR | X | 248 | 21.616 | -66.503 | 54.584 | 1.00 | 84.68  |
| C    |      |     |     |   |     |        |         |        |      |        |
| ATOM | 3178 | CE2 | TYR | X | 248 | 20.873 | -65.953 | 52.410 | 1.00 | 97.82  |
| C    |      |     |     |   |     |        |         |        |      |        |
| ATOM | 3179 | CZ  | TYR | X | 248 | 20.595 | -66.124 | 53.747 | 1.00 | 85.49  |
| C    |      |     |     |   |     |        |         |        |      |        |
| ATOM | 3180 | OH  | TYR | X | 248 | 19.280 | -65.961 | 54.228 | 1.00 | 68.08  |
| O    |      |     |     |   |     |        |         |        |      |        |
| ATOM | 3181 | N   | ASP | X | 249 | 27.518 | -68.882 | 52.111 | 1.00 | 73.03  |
| N    |      |     |     |   |     |        |         |        |      |        |
| ATOM | 3182 | CA  | ASP | X | 249 | 28.872 | -69.034 | 51.589 | 1.00 | 88.71  |
| C    |      |     |     |   |     |        |         |        |      |        |
| ATOM | 3183 | C   | ASP | X | 249 | 28.928 | -70.308 | 50.781 | 1.00 | 101.02 |
| C    |      |     |     |   |     |        |         |        |      |        |
| ATOM | 3184 | O   | ASP | X | 249 | 28.912 | -71.392 | 51.348 | 1.00 | 89.16  |
| O    |      |     |     |   |     |        |         |        |      |        |
| ATOM | 3185 | CB  | ASP | X | 249 | 29.889 | -69.140 | 52.709 | 1.00 | 93.82  |
| C    |      |     |     |   |     |        |         |        |      |        |
| ATOM | 3186 | CG  | ASP | X | 249 | 31.336 | -69.147 | 52.193 | 1.00 | 87.40  |
| C    |      |     |     |   |     |        |         |        |      |        |
| ATOM | 3187 | OD1 | ASP | X | 249 | 31.659 | -68.383 | 51.245 | 1.00 | 76.77  |
| O    |      |     |     |   |     |        |         |        |      |        |
| ATOM | 3188 | OD2 | ASP | X | 249 | 32.159 | -69.873 | 52.788 | 1.00 | 88.37  |
| O1-  |      |     |     |   |     |        |         |        |      |        |
| ATOM | 3189 | N   | ALA | X | 250 | 29.043 | -70.160 | 49.465 | 1.00 | 108.06 |
| N    |      |     |     |   |     |        |         |        |      |        |
| ATOM | 3190 | CA  | ALA | X | 250 | 29.113 | -71.279 | 48.534 | 1.00 | 96.76  |
| C    |      |     |     |   |     |        |         |        |      |        |
| ATOM | 3191 | C   | ALA | X | 250 | 30.036 | -72.395 | 49.030 | 1.00 | 94.94  |
| C    |      |     |     |   |     |        |         |        |      |        |
| ATOM | 3192 | O   | ALA | X | 250 | 29.657 | -73.557 | 49.083 | 1.00 | 102.31 |
| O    |      |     |     |   |     |        |         |        |      |        |
| ATOM | 3193 | CB  | ALA | X | 250 | 29.584 | -70.766 | 47.188 | 1.00 | 94.42  |
| C    |      |     |     |   |     |        |         |        |      |        |
| ATOM | 3194 | N   | GLU | X | 251 | 31.235 | -72.012 | 49.427 | 1.00 | 96.04  |
| N    |      |     |     |   |     |        |         |        |      |        |
| ATOM | 3195 | CA  | GLU | X | 251 | 32.244 | -72.977 | 49.833 | 1.00 | 104.72 |
| C    |      |     |     |   |     |        |         |        |      |        |
| ATOM | 3196 | C   | GLU | X | 251 | 31.737 | -73.806 | 51.036 | 1.00 | 95.74  |
| C    |      |     |     |   |     |        |         |        |      |        |
| ATOM | 3197 | O   | GLU | X | 251 | 31.863 | -75.046 | 51.065 | 1.00 | 92.64  |
| O    |      |     |     |   |     |        |         |        |      |        |
| ATOM | 3198 | CB  | GLU | X | 251 | 33.545 | -72.251 | 50.202 | 1.00 | 112.93 |
| C    |      |     |     |   |     |        |         |        |      |        |
| ATOM | 3199 | CG  | GLU | X | 251 | 34.046 | -71.264 | 49.149 | 1.00 | 118.85 |
| C    |      |     |     |   |     |        |         |        |      |        |
| ATOM | 3200 | CD  | GLU | X | 251 | 34.599 | -71.948 | 47.912 | 1.00 | 145.03 |
| C    |      |     |     |   |     |        |         |        |      |        |
| ATOM | 3201 | OE1 | GLU | X | 251 | 34.829 | -71.247 | 46.904 | 1.00 | 162.64 |
| O    |      |     |     |   |     |        |         |        |      |        |
| ATOM | 3202 | OE2 | GLU | X | 251 | 34.822 | -73.179 | 47.944 | 1.00 | 162.59 |
| O1-  |      |     |     |   |     |        |         |        |      |        |
| ATOM | 3203 | N   | THR | X | 252 | 31.110 | -73.132 | 51.996 | 1.00 | 92.53  |
| N    |      |     |     |   |     |        |         |        |      |        |

|      |      |     |     |   |     |        |         |        |      |        |
|------|------|-----|-----|---|-----|--------|---------|--------|------|--------|
| ATOM | 3204 | CA  | THR | X | 252 | 30.608 | -73.814 | 53.191 | 1.00 | 97.05  |
| C    |      |     |     |   |     |        |         |        |      |        |
| ATOM | 3205 | C   | THR | X | 252 | 29.466 | -74.769 | 52.867 | 1.00 | 103.93 |
| C    |      |     |     |   |     |        |         |        |      |        |
| ATOM | 3206 | O   | THR | X | 252 | 29.522 | -75.942 | 53.200 | 1.00 | 105.01 |
| O    |      |     |     |   |     |        |         |        |      |        |
| ATOM | 3207 | CB  | THR | X | 252 | 30.176 | -72.797 | 54.258 | 1.00 | 117.49 |
| C    |      |     |     |   |     |        |         |        |      |        |
| ATOM | 3208 | OG1 | THR | X | 252 | 31.284 | -71.937 | 54.575 | 1.00 | 82.36  |
| O    |      |     |     |   |     |        |         |        |      |        |
| ATOM | 3209 | CG2 | THR | X | 252 | 29.678 | -73.512 | 55.529 | 1.00 | 130.29 |
| C    |      |     |     |   |     |        |         |        |      |        |
| ATOM | 3210 | N   | LEU | X | 253 | 28.438 | -74.247 | 52.209 | 1.00 | 108.90 |
| N    |      |     |     |   |     |        |         |        |      |        |
| ATOM | 3211 | CA  | LEU | X | 253 | 27.256 | -75.006 | 51.831 | 1.00 | 95.95  |
| C    |      |     |     |   |     |        |         |        |      |        |
| ATOM | 3212 | C   | LEU | X | 253 | 27.639 | -76.270 | 51.097 | 1.00 | 101.79 |
| C    |      |     |     |   |     |        |         |        |      |        |
| ATOM | 3213 | O   | LEU | X | 253 | 27.156 | -77.344 | 51.431 | 1.00 | 118.30 |
| O    |      |     |     |   |     |        |         |        |      |        |
| ATOM | 3214 | CB  | LEU | X | 253 | 26.411 | -74.165 | 50.884 | 1.00 | 75.02  |
| C    |      |     |     |   |     |        |         |        |      |        |
| ATOM | 3215 | CG  | LEU | X | 253 | 25.805 | -72.888 | 51.431 | 1.00 | 77.78  |
| C    |      |     |     |   |     |        |         |        |      |        |
| ATOM | 3216 | CD1 | LEU | X | 253 | 25.157 | -72.082 | 50.323 | 1.00 | 72.37  |
| C    |      |     |     |   |     |        |         |        |      |        |
| ATOM | 3217 | CD2 | LEU | X | 253 | 24.788 | -73.248 | 52.494 | 1.00 | 95.75  |
| C    |      |     |     |   |     |        |         |        |      |        |
| ATOM | 3218 | N   | MET | X | 254 | 28.513 | -76.135 | 50.103 | 1.00 | 96.46  |
| N    |      |     |     |   |     |        |         |        |      |        |
| ATOM | 3219 | CA  | MET | X | 254 | 29.003 | -77.268 | 49.308 | 1.00 | 90.39  |
| C    |      |     |     |   |     |        |         |        |      |        |
| ATOM | 3220 | C   | MET | X | 254 | 29.581 | -78.359 | 50.217 | 1.00 | 76.12  |
| C    |      |     |     |   |     |        |         |        |      |        |
| ATOM | 3221 | O   | MET | X | 254 | 29.318 | -79.555 | 50.015 | 1.00 | 94.49  |
| O    |      |     |     |   |     |        |         |        |      |        |
| ATOM | 3222 | CB  | MET | X | 254 | 30.022 | -76.808 | 48.270 | 1.00 | 105.48 |
| C    |      |     |     |   |     |        |         |        |      |        |
| ATOM | 3223 | CG  | MET | X | 254 | 29.346 | -76.163 | 47.060 | 1.00 | 110.71 |
| C    |      |     |     |   |     |        |         |        |      |        |
| ATOM | 3224 | SD  | MET | X | 254 | 30.424 | -75.389 | 45.850 | 1.00 | 118.10 |
| S    |      |     |     |   |     |        |         |        |      |        |
| ATOM | 3225 | CE  | MET | X | 254 | 31.537 | -76.742 | 45.440 | 1.00 | 140.27 |
| C    |      |     |     |   |     |        |         |        |      |        |
| ATOM | 3226 | N   | ASP | X | 255 | 30.335 | -77.927 | 51.226 | 1.00 | 72.23  |
| N    |      |     |     |   |     |        |         |        |      |        |
| ATOM | 3227 | CA  | ASP | X | 255 | 30.881 | -78.845 | 52.218 | 1.00 | 78.69  |
| C    |      |     |     |   |     |        |         |        |      |        |
| ATOM | 3228 | C   | ASP | X | 255 | 29.804 | -79.522 | 53.069 | 1.00 | 76.21  |
| C    |      |     |     |   |     |        |         |        |      |        |
| ATOM | 3229 | O   | ASP | X | 255 | 29.863 | -80.710 | 53.300 | 1.00 | 89.01  |
| O    |      |     |     |   |     |        |         |        |      |        |
| ATOM | 3230 | CB  | ASP | X | 255 | 31.977 | -78.238 | 53.056 | 1.00 | 89.19  |
| C    |      |     |     |   |     |        |         |        |      |        |

|      |      |     |     |   |     |        |         |        |      |        |
|------|------|-----|-----|---|-----|--------|---------|--------|------|--------|
| ATOM | 3231 | CG  | ASP | X | 255 | 33.289 | -78.930 | 52.838 | 1.00 | 90.62  |
| C    |      |     |     |   |     |        |         |        |      |        |
| ATOM | 3232 | OD1 | ASP | X | 255 | 33.888 | -78.684 | 51.776 | 1.00 | 122.02 |
| O    |      |     |     |   |     |        |         |        |      |        |
| ATOM | 3233 | OD2 | ASP | X | 255 | 33.673 | -79.789 | 53.665 | 1.00 | 77.58  |
| O1-  |      |     |     |   |     |        |         |        |      |        |
| ATOM | 3234 | N   | ARG | X | 256 | 28.814 | -78.767 | 53.513 | 1.00 | 79.55  |
| N    |      |     |     |   |     |        |         |        |      |        |
| ATOM | 3235 | CA  | ARG | X | 256 | 27.684 | -79.327 | 54.274 | 1.00 | 95.99  |
| C    |      |     |     |   |     |        |         |        |      |        |
| ATOM | 3236 | C   | ARG | X | 256 | 26.914 | -80.339 | 53.435 | 1.00 | 91.70  |
| C    |      |     |     |   |     |        |         |        |      |        |
| ATOM | 3237 | O   | ARG | X | 256 | 26.450 | -81.347 | 53.951 | 1.00 | 114.97 |
| O    |      |     |     |   |     |        |         |        |      |        |
| ATOM | 3238 | CB  | ARG | X | 256 | 26.738 | -78.218 | 54.754 | 1.00 | 110.12 |
| C    |      |     |     |   |     |        |         |        |      |        |
| ATOM | 3239 | CG  | ARG | X | 256 | 27.206 | -77.465 | 55.998 | 1.00 | 103.73 |
| C    |      |     |     |   |     |        |         |        |      |        |
| ATOM | 3240 | CD  | ARG | X | 256 | 26.430 | -76.170 | 56.176 | 1.00 | 77.21  |
| C    |      |     |     |   |     |        |         |        |      |        |
| ATOM | 3241 | NE  | ARG | X | 256 | 24.989 | -76.417 | 56.335 | 1.00 | 67.21  |
| N    |      |     |     |   |     |        |         |        |      |        |
| ATOM | 3242 | CZ  | ARG | X | 256 | 24.061 | -75.466 | 56.262 | 1.00 | 68.80  |
| C    |      |     |     |   |     |        |         |        |      |        |
| ATOM | 3243 | NH1 | ARG | X | 256 | 24.442 | -74.208 | 56.045 | 1.00 | 94.41  |
| N    |      |     |     |   |     |        |         |        |      |        |
| ATOM | 3244 | NH2 | ARG | X | 256 | 22.761 | -75.753 | 56.414 | 1.00 | 49.94  |
| N1+  |      |     |     |   |     |        |         |        |      |        |
| ATOM | 3245 | N   | ILE | X | 257 | 26.792 | -80.067 | 52.140 | 1.00 | 92.67  |
| N    |      |     |     |   |     |        |         |        |      |        |
| ATOM | 3246 | CA  | ILE | X | 257 | 26.167 | -80.994 | 51.197 | 1.00 | 101.67 |
| C    |      |     |     |   |     |        |         |        |      |        |
| ATOM | 3247 | C   | ILE | X | 257 | 27.064 | -82.222 | 50.985 | 1.00 | 103.31 |
| C    |      |     |     |   |     |        |         |        |      |        |
| ATOM | 3248 | O   | ILE | X | 257 | 26.571 | -83.345 | 50.964 | 1.00 | 116.98 |
| O    |      |     |     |   |     |        |         |        |      |        |
| ATOM | 3249 | CB  | ILE | X | 257 | 25.890 | -80.312 | 49.852 | 1.00 | 97.07  |
| C    |      |     |     |   |     |        |         |        |      |        |
| ATOM | 3250 | CG1 | ILE | X | 257 | 24.727 | -79.342 | 50.000 | 1.00 | 101.10 |
| C    |      |     |     |   |     |        |         |        |      |        |
| ATOM | 3251 | CG2 | ILE | X | 257 | 25.525 | -81.353 | 48.822 | 1.00 | 103.61 |
| C    |      |     |     |   |     |        |         |        |      |        |
| ATOM | 3252 | CD1 | ILE | X | 257 | 24.580 | -78.347 | 48.874 | 1.00 | 99.09  |
| C    |      |     |     |   |     |        |         |        |      |        |
| ATOM | 3253 | N   | LYS | X | 258 | 28.372 | -82.007 | 50.845 | 1.00 | 90.83  |
| N    |      |     |     |   |     |        |         |        |      |        |
| ATOM | 3254 | CA  | LYS | X | 258 | 29.310 | -83.124 | 50.706 | 1.00 | 82.15  |
| C    |      |     |     |   |     |        |         |        |      |        |
| ATOM | 3255 | C   | LYS | X | 258 | 29.084 | -84.206 | 51.756 | 1.00 | 82.39  |
| C    |      |     |     |   |     |        |         |        |      |        |
| ATOM | 3256 | O   | LYS | X | 258 | 28.949 | -85.371 | 51.420 | 1.00 | 107.29 |
| O    |      |     |     |   |     |        |         |        |      |        |
| ATOM | 3257 | CB  | LYS | X | 258 | 30.760 | -82.665 | 50.709 | 1.00 | 86.16  |
| C    |      |     |     |   |     |        |         |        |      |        |

|      |      |     |     |   |     |        |         |        |      |        |
|------|------|-----|-----|---|-----|--------|---------|--------|------|--------|
| ATOM | 3258 | CG  | LYS | X | 258 | 31.321 | -82.484 | 49.304 | 1.00 | 86.98  |
| C    |      |     |     |   |     |        |         |        |      |        |
| ATOM | 3259 | CD  | LYS | X | 258 | 32.812 | -82.171 | 49.315 | 1.00 | 95.64  |
| C    |      |     |     |   |     |        |         |        |      |        |
| ATOM | 3260 | CE  | LYS | X | 258 | 33.252 | -81.504 | 48.018 | 1.00 | 95.70  |
| C    |      |     |     |   |     |        |         |        |      |        |
| ATOM | 3261 | NZ  | LYS | X | 258 | 33.237 | -80.009 | 48.076 | 1.00 | 99.08  |
| N1+  |      |     |     |   |     |        |         |        |      |        |
| ATOM | 3262 | N   | LYS | X | 259 | 29.016 | -83.817 | 53.013 | 1.00 | 89.25  |
| N    |      |     |     |   |     |        |         |        |      |        |
| ATOM | 3263 | CA  | LYS | X | 259 | 28.834 | -84.761 | 54.127 | 1.00 | 104.88 |
| C    |      |     |     |   |     |        |         |        |      |        |
| ATOM | 3264 | C   | LYS | X | 259 | 27.611 | -85.673 | 53.980 | 1.00 | 105.16 |
| C    |      |     |     |   |     |        |         |        |      |        |
| ATOM | 3265 | O   | LYS | X | 259 | 27.684 | -86.862 | 54.274 | 1.00 | 126.37 |
| O    |      |     |     |   |     |        |         |        |      |        |
| ATOM | 3266 | CB  | LYS | X | 259 | 28.705 | -83.978 | 55.442 | 1.00 | 127.79 |
| C    |      |     |     |   |     |        |         |        |      |        |
| ATOM | 3267 | CG  | LYS | X | 259 | 29.996 | -83.323 | 55.928 | 1.00 | 136.17 |
| C    |      |     |     |   |     |        |         |        |      |        |
| ATOM | 3268 | CD  | LYS | X | 259 | 29.745 | -82.302 | 57.042 | 1.00 | 133.52 |
| C    |      |     |     |   |     |        |         |        |      |        |
| ATOM | 3269 | CE  | LYS | X | 259 | 30.750 | -82.435 | 58.183 | 1.00 | 132.97 |
| C    |      |     |     |   |     |        |         |        |      |        |
| ATOM | 3270 | NZ  | LYS | X | 259 | 31.223 | -81.115 | 58.678 | 1.00 | 142.76 |
| N1+  |      |     |     |   |     |        |         |        |      |        |
| ATOM | 3271 | N   | GLN | X | 260 | 26.499 | -85.126 | 53.501 | 1.00 | 117.04 |
| N    |      |     |     |   |     |        |         |        |      |        |
| ATOM | 3272 | CA  | GLN | X | 260 | 25.307 | -85.950 | 53.219 | 1.00 | 129.49 |
| C    |      |     |     |   |     |        |         |        |      |        |
| ATOM | 3273 | C   | GLN | X | 260 | 25.596 | -86.906 | 52.075 | 1.00 | 138.35 |
| C    |      |     |     |   |     |        |         |        |      |        |
| ATOM | 3274 | O   | GLN | X | 260 | 25.305 | -88.082 | 52.165 | 1.00 | 181.55 |
| O    |      |     |     |   |     |        |         |        |      |        |
| ATOM | 3275 | CB  | GLN | X | 260 | 24.075 | -85.113 | 52.811 | 1.00 | 126.46 |
| C    |      |     |     |   |     |        |         |        |      |        |
| ATOM | 3276 | CG  | GLN | X | 260 | 23.796 | -83.870 | 53.642 | 1.00 | 162.89 |
| C    |      |     |     |   |     |        |         |        |      |        |
| ATOM | 3277 | CD  | GLN | X | 260 | 22.905 | -84.142 | 54.836 | 1.00 | 168.17 |
| C    |      |     |     |   |     |        |         |        |      |        |
| ATOM | 3278 | NE2 | GLN | X | 260 | 21.904 | -83.448 | 55.050 | 1.00 | 137.59 |
| N    |      |     |     |   |     |        |         |        |      |        |
| ATOM | 3279 | OE1 | GLN | X | 260 | 23.290 | -85.120 | 55.651 | 1.00 | 179.19 |
| O    |      |     |     |   |     |        |         |        |      |        |
| ATOM | 3280 | N   | LEU | X | 261 | 26.179 | -86.386 | 50.997 | 1.00 | 127.72 |
| N    |      |     |     |   |     |        |         |        |      |        |
| ATOM | 3281 | CA  | LEU | X | 261 | 26.542 | -87.188 | 49.809 | 1.00 | 109.11 |
| C    |      |     |     |   |     |        |         |        |      |        |
| ATOM | 3282 | C   | LEU | X | 261 | 27.543 | -88.289 | 50.145 | 1.00 | 104.20 |
| C    |      |     |     |   |     |        |         |        |      |        |
| ATOM | 3283 | O   | LEU | X | 261 | 27.677 | -89.259 | 49.401 | 1.00 | 127.10 |
| O    |      |     |     |   |     |        |         |        |      |        |
| ATOM | 3284 | CB  | LEU | X | 261 | 27.245 | -86.324 | 48.754 | 1.00 | 95.63  |
| C    |      |     |     |   |     |        |         |        |      |        |

|      |      |     |     |   |     |        |         |        |      |        |
|------|------|-----|-----|---|-----|--------|---------|--------|------|--------|
| ATOM | 3285 | CG  | LEU | X | 261 | 26.503 | -85.361 | 47.841 | 1.00 | 98.46  |
| C    |      |     |     |   |     |        |         |        |      |        |
| ATOM | 3286 | CD1 | LEU | X | 261 | 27.414 | -84.963 | 46.674 | 1.00 | 84.43  |
| C    |      |     |     |   |     |        |         |        |      |        |
| ATOM | 3287 | CD2 | LEU | X | 261 | 25.195 | -85.971 | 47.355 | 1.00 | 112.01 |
| C    |      |     |     |   |     |        |         |        |      |        |
| ATOM | 3288 | N   | ARG | X | 262 | 28.280 | -88.095 | 51.238 | 1.00 | 99.64  |
| N    |      |     |     |   |     |        |         |        |      |        |
| ATOM | 3289 | CA  | ARG | X | 262 | 29.298 | -89.033 | 51.695 | 1.00 | 108.57 |
| C    |      |     |     |   |     |        |         |        |      |        |
| ATOM | 3290 | C   | ARG | X | 262 | 28.649 | -90.270 | 52.295 | 1.00 | 107.76 |
| C    |      |     |     |   |     |        |         |        |      |        |
| ATOM | 3291 | O   | ARG | X | 262 | 29.244 | -91.350 | 52.299 | 1.00 | 132.56 |
| O    |      |     |     |   |     |        |         |        |      |        |
| ATOM | 3292 | CB  | ARG | X | 262 | 30.274 | -88.412 | 52.699 | 1.00 | 144.50 |
| C    |      |     |     |   |     |        |         |        |      |        |
| ATOM | 3293 | CG  | ARG | X | 262 | 31.440 | -89.342 | 53.070 | 1.00 | 168.74 |
| C    |      |     |     |   |     |        |         |        |      |        |
| ATOM | 3294 | CD  | ARG | X | 262 | 32.464 | -88.688 | 53.997 | 1.00 | 175.11 |
| C    |      |     |     |   |     |        |         |        |      |        |
| ATOM | 3295 | NE  | ARG | X | 262 | 32.713 | -87.292 | 53.642 | 1.00 | 191.86 |
| N    |      |     |     |   |     |        |         |        |      |        |
| ATOM | 3296 | CZ  | ARG | X | 262 | 33.352 | -86.889 | 52.542 | 1.00 | 177.98 |
| C    |      |     |     |   |     |        |         |        |      |        |
| ATOM | 3297 | NH1 | ARG | X | 262 | 33.851 | -87.776 | 51.685 | 1.00 | 176.20 |
| N    |      |     |     |   |     |        |         |        |      |        |
| ATOM | 3298 | NH2 | ARG | X | 262 | 33.486 | -85.588 | 52.292 | 1.00 | 146.87 |
| N1+  |      |     |     |   |     |        |         |        |      |        |
| ATOM | 3299 | N   | GLU | X | 263 | 27.497 | -90.010 | 52.897 | 1.00 | 107.57 |
| N    |      |     |     |   |     |        |         |        |      |        |
| ATOM | 3300 | CA  | GLU | X | 263 | 26.679 | -91.004 | 53.552 | 1.00 | 123.56 |
| C    |      |     |     |   |     |        |         |        |      |        |
| ATOM | 3301 | C   | GLU | X | 263 | 26.228 | -91.927 | 52.473 | 1.00 | 133.50 |
| C    |      |     |     |   |     |        |         |        |      |        |
| ATOM | 3302 | O   | GLU | X | 263 | 26.152 | -93.128 | 52.659 | 1.00 | 144.03 |
| O    |      |     |     |   |     |        |         |        |      |        |
| ATOM | 3303 | CB  | GLU | X | 263 | 25.511 | -90.360 | 54.273 | 1.00 | 130.56 |
| C    |      |     |     |   |     |        |         |        |      |        |
| ATOM | 3304 | CG  | GLU | X | 263 | 25.964 | -89.510 | 55.447 | 1.00 | 139.25 |
| C    |      |     |     |   |     |        |         |        |      |        |
| ATOM | 3305 | CD  | GLU | X | 263 | 24.814 | -89.045 | 56.301 | 1.00 | 156.31 |
| C    |      |     |     |   |     |        |         |        |      |        |
| ATOM | 3306 | OE1 | GLU | X | 263 | 25.009 | -88.128 | 57.124 | 1.00 | 148.07 |
| O    |      |     |     |   |     |        |         |        |      |        |
| ATOM | 3307 | OE2 | GLU | X | 263 | 23.712 | -89.602 | 56.142 | 1.00 | 171.08 |
| O1-  |      |     |     |   |     |        |         |        |      |        |
| ATOM | 3308 | N   | TRP | X | 264 | 25.938 | -91.359 | 51.317 | 1.00 | 143.71 |
| N    |      |     |     |   |     |        |         |        |      |        |
| ATOM | 3309 | CA  | TRP | X | 264 | 25.576 | -92.190 | 50.190 | 1.00 | 143.56 |
| C    |      |     |     |   |     |        |         |        |      |        |
| ATOM | 3310 | C   | TRP | X | 264 | 26.795 | -93.072 | 49.925 | 1.00 | 146.17 |
| C    |      |     |     |   |     |        |         |        |      |        |
| ATOM | 3311 | O   | TRP | X | 264 | 26.676 | -94.190 | 49.454 | 1.00 | 127.07 |
| O    |      |     |     |   |     |        |         |        |      |        |

|      |      |     |     |   |     |        |         |        |            |
|------|------|-----|-----|---|-----|--------|---------|--------|------------|
| ATOM | 3312 | CB  | TRP | X | 264 | 25.041 | -91.364 | 49.049 | 1.00150.41 |
| C    |      |     |     |   |     |        |         |        |            |
| ATOM | 3313 | CG  | TRP | X | 264 | 23.655 | -90.950 | 49.422 | 1.00139.66 |
| C    |      |     |     |   |     |        |         |        |            |
| ATOM | 3314 | CD1 | TRP | X | 264 | 22.767 | -91.686 | 50.137 | 1.00136.98 |
| C    |      |     |     |   |     |        |         |        |            |
| ATOM | 3315 | CD2 | TRP | X | 264 | 23.003 | -89.720 | 49.124 | 1.00111.31 |
| C    |      |     |     |   |     |        |         |        |            |
| ATOM | 3316 | NE1 | TRP | X | 264 | 21.605 | -90.998 | 50.295 | 1.00124.10 |
| N    |      |     |     |   |     |        |         |        |            |
| ATOM | 3317 | CE2 | TRP | X | 264 | 21.726 | -89.784 | 49.681 | 1.00101.17 |
| C    |      |     |     |   |     |        |         |        |            |
| ATOM | 3318 | CE3 | TRP | X | 264 | 23.372 | -88.575 | 48.433 | 1.00104.23 |
| C    |      |     |     |   |     |        |         |        |            |
| ATOM | 3319 | CZ2 | TRP | X | 264 | 20.822 | -88.754 | 49.570 | 1.00 92.43 |
| C    |      |     |     |   |     |        |         |        |            |
| ATOM | 3320 | CZ3 | TRP | X | 264 | 22.474 | -87.560 | 48.324 | 1.00 83.87 |
| C    |      |     |     |   |     |        |         |        |            |
| ATOM | 3321 | CH2 | TRP | X | 264 | 21.216 | -87.652 | 48.886 | 1.00 88.99 |
| C    |      |     |     |   |     |        |         |        |            |
| ATOM | 3322 | N   | ASP | X | 265 | 27.969 | -92.543 | 50.264 | 1.00160.58 |
| N    |      |     |     |   |     |        |         |        |            |
| ATOM | 3323 | CA  | ASP | X | 265 | 29.235 | -93.252 | 50.321 | 1.00161.07 |
| C    |      |     |     |   |     |        |         |        |            |
| ATOM | 3324 | C   | ASP | X | 265 | 30.297 | -93.354 | 49.266 | 1.00150.21 |
| C    |      |     |     |   |     |        |         |        |            |
| ATOM | 3325 | O   | ASP | X | 265 | 30.082 | -93.298 | 48.066 | 1.00182.24 |
| O    |      |     |     |   |     |        |         |        |            |
| ATOM | 3326 | CB  | ASP | X | 265 | 28.969 | -94.685 | 50.801 | 1.00156.01 |
| C    |      |     |     |   |     |        |         |        |            |
| ATOM | 3327 | CG  | ASP | X | 265 | 30.187 | -95.338 | 51.386 | 1.00157.02 |
| C    |      |     |     |   |     |        |         |        |            |
| ATOM | 3328 | OD1 | ASP | X | 265 | 31.266 | -94.708 | 51.384 | 1.00197.83 |
| O    |      |     |     |   |     |        |         |        |            |
| ATOM | 3329 | OD2 | ASP | X | 265 | 30.056 | -96.485 | 51.859 | 1.00146.63 |
| O1-  |      |     |     |   |     |        |         |        |            |
| ATOM | 3330 | N   | GLU | X | 266 | 31.479 | -93.492 | 49.848 | 1.00139.40 |
| N    |      |     |     |   |     |        |         |        |            |
| ATOM | 3331 | CA  | GLU | X | 266 | 32.752 | -93.755 | 49.227 | 1.00154.05 |
| C    |      |     |     |   |     |        |         |        |            |
| ATOM | 3332 | C   | GLU | X | 266 | 33.279 | -92.743 | 48.263 | 1.00149.75 |
| C    |      |     |     |   |     |        |         |        |            |
| ATOM | 3333 | O   | GLU | X | 266 | 34.203 | -93.038 | 47.521 | 1.00152.48 |
| O    |      |     |     |   |     |        |         |        |            |
| ATOM | 3334 | CB  | GLU | X | 266 | 32.785 | -95.150 | 48.624 | 1.00148.31 |
| C    |      |     |     |   |     |        |         |        |            |
| ATOM | 3335 | CG  | GLU | X | 266 | 32.649 | -96.255 | 49.656 | 1.00167.29 |
| C    |      |     |     |   |     |        |         |        |            |
| ATOM | 3336 | CD  | GLU | X | 266 | 33.667 | -96.164 | 50.783 | 1.00185.43 |
| C    |      |     |     |   |     |        |         |        |            |
| ATOM | 3337 | OE1 | GLU | X | 266 | 33.969 | -95.047 | 51.253 | 1.00182.21 |
| O    |      |     |     |   |     |        |         |        |            |
| ATOM | 3338 | OE2 | GLU | X | 266 | 34.159 | -97.227 | 51.216 | 1.00168.27 |
| O1-  |      |     |     |   |     |        |         |        |            |

|      |      |     |     |   |     |        |         |        |      |        |
|------|------|-----|-----|---|-----|--------|---------|--------|------|--------|
| ATOM | 3339 | N   | ASN | X | 267 | 32.753 | -91.536 | 48.262 | 1.00 | 131.42 |
| N    |      |     |     |   |     |        |         |        |      |        |
| ATOM | 3340 | CA  | ASN | X | 267 | 33.359 | -90.627 | 47.289 | 1.00 | 105.37 |
| C    |      |     |     |   |     |        |         |        |      |        |
| ATOM | 3341 | C   | ASN | X | 267 | 34.896 | -90.599 | 47.377 | 1.00 | 88.52  |
| C    |      |     |     |   |     |        |         |        |      |        |
| ATOM | 3342 | O   | ASN | X | 267 | 35.462 | -90.840 | 48.453 | 1.00 | 89.78  |
| O    |      |     |     |   |     |        |         |        |      |        |
| ATOM | 3343 | CB  | ASN | X | 267 | 32.797 | -89.208 | 47.484 | 1.00 | 0.00   |
| C    |      |     |     |   |     |        |         |        |      |        |
| ATOM | 3344 | CG  | ASN | X | 267 | 31.297 | -89.065 | 47.195 | 1.00 | 0.00   |
| C    |      |     |     |   |     |        |         |        |      |        |
| ATOM | 3345 | OD1 | ASN | X | 267 | 30.657 | -89.954 | 46.635 | 1.00 | 0.00   |
| O    |      |     |     |   |     |        |         |        |      |        |
| ATOM | 3346 | ND2 | ASN | X | 267 | 30.736 | -87.909 | 47.563 | 1.00 | 0.00   |
| N    |      |     |     |   |     |        |         |        |      |        |
| ATOM | 3347 | N   | LEU | X | 268 | 35.596 | -90.152 | 46.331 | 1.00 | 0.00   |
| N    |      |     |     |   |     |        |         |        |      |        |
| ATOM | 3348 | CA  | LEU | X | 268 | 37.030 | -89.889 | 46.454 | 1.00 | 0.00   |
| C    |      |     |     |   |     |        |         |        |      |        |
| ATOM | 3349 | C   | LEU | X | 268 | 37.333 | -88.768 | 47.485 | 1.00 | 0.00   |
| C    |      |     |     |   |     |        |         |        |      |        |
| ATOM | 3350 | O   | LEU | X | 268 | 36.495 | -87.916 | 47.793 | 1.00 | 0.00   |
| O    |      |     |     |   |     |        |         |        |      |        |
| ATOM | 3351 | CB  | LEU | X | 268 | 37.596 | -89.525 | 45.067 | 1.00 | 0.00   |
| C    |      |     |     |   |     |        |         |        |      |        |
| ATOM | 3352 | CG  | LEU | X | 268 | 37.758 | -90.736 | 44.124 | 1.00 | 0.00   |
| C    |      |     |     |   |     |        |         |        |      |        |
| ATOM | 3353 | CD1 | LEU | X | 268 | 38.023 | -90.262 | 42.687 | 1.00 | 0.00   |
| C    |      |     |     |   |     |        |         |        |      |        |
| ATOM | 3354 | CD2 | LEU | X | 268 | 38.917 | -91.645 | 44.572 | 1.00 | 0.00   |
| C    |      |     |     |   |     |        |         |        |      |        |
| ATOM | 3355 | N   | LYS | X | 269 | 38.549 | -88.785 | 48.040 | 1.00 | 0.00   |
| N    |      |     |     |   |     |        |         |        |      |        |
| ATOM | 3356 | CA  | LYS | X | 269 | 39.005 | -87.854 | 49.083 | 1.00 | 0.00   |
| C    |      |     |     |   |     |        |         |        |      |        |
| ATOM | 3357 | C   | LYS | X | 269 | 39.989 | -86.776 | 48.568 | 1.00 | 0.00   |
| C    |      |     |     |   |     |        |         |        |      |        |
| ATOM | 3358 | O   | LYS | X | 269 | 40.683 | -86.143 | 49.364 | 1.00 | 0.00   |
| O    |      |     |     |   |     |        |         |        |      |        |
| ATOM | 3359 | CB  | LYS | X | 269 | 39.706 | -88.644 | 50.231 | 1.00 | 0.00   |
| C    |      |     |     |   |     |        |         |        |      |        |
| ATOM | 3360 | CG  | LYS | X | 269 | 38.899 | -89.844 | 50.758 | 1.00 | 0.00   |
| C    |      |     |     |   |     |        |         |        |      |        |
| ATOM | 3361 | CD  | LYS | X | 269 | 37.474 | -89.491 | 51.210 | 1.00 | 0.00   |
| C    |      |     |     |   |     |        |         |        |      |        |
| ATOM | 3362 | CE  | LYS | X | 269 | 36.785 | -90.726 | 51.796 | 1.00 | 0.00   |
| C    |      |     |     |   |     |        |         |        |      |        |
| ATOM | 3363 | NZ  | LYS | X | 269 | 35.425 | -90.410 | 52.263 | 1.00 | 0.00   |
| N1+  |      |     |     |   |     |        |         |        |      |        |
| ATOM | 3364 | N   | ASP | X | 270 | 40.089 | -86.613 | 47.244 | 1.00 | 0.00   |
| N    |      |     |     |   |     |        |         |        |      |        |
| ATOM | 3365 | CA  | ASP | X | 270 | 41.033 | -85.722 | 46.564 | 1.00 | 0.00   |
| C    |      |     |     |   |     |        |         |        |      |        |



|      |      |     |     |   |     |        |         |        |      |        |
|------|------|-----|-----|---|-----|--------|---------|--------|------|--------|
| ATOM | 3366 | C   | ASP | X | 270 | 40.378 | -85.106 | 45.306 | 1.00 | 0.00   |
| C    |      |     |     |   |     |        |         |        |      |        |
| ATOM | 3367 | O   | ASP | X | 270 | 39.373 | -84.406 | 45.420 | 1.00 | 0.00   |
| O    |      |     |     |   |     |        |         |        |      |        |
| ATOM | 3368 | CB  | ASP | X | 270 | 42.315 | -86.494 | 46.138 | 1.00 | 0.00   |
| C    |      |     |     |   |     |        |         |        |      |        |
| ATOM | 3369 | CG  | ASP | X | 270 | 43.029 | -87.104 | 47.345 | 1.00 | 0.00   |
| C    |      |     |     |   |     |        |         |        |      |        |
| ATOM | 3370 | OD1 | ASP | X | 270 | 43.022 | -88.307 | 47.601 | 1.00 | 0.00   |
| O    |      |     |     |   |     |        |         |        |      |        |
| ATOM | 3371 | OD2 | ASP | X | 270 | 43.679 | -86.188 | 48.121 | 1.00 | 0.00   |
| O1-  |      |     |     |   |     |        |         |        |      |        |
| ATOM | 3372 | N   | ASP | X | 271 | 40.893 | -85.393 | 44.102 | 1.00 | 0.00   |
| N    |      |     |     |   |     |        |         |        |      |        |
| ATOM | 3373 | CA  | ASP | X | 271 | 40.185 | -85.119 | 42.850 | 1.00 | 0.00   |
| C    |      |     |     |   |     |        |         |        |      |        |
| ATOM | 3374 | C   | ASP | X | 271 | 38.851 | -85.894 | 42.823 | 1.00 | 0.00   |
| C    |      |     |     |   |     |        |         |        |      |        |
| ATOM | 3375 | O   | ASP | X | 271 | 38.827 | -87.071 | 43.186 | 1.00 | 0.00   |
| O    |      |     |     |   |     |        |         |        |      |        |
| ATOM | 3376 | CB  | ASP | X | 271 | 41.043 | -85.541 | 41.620 | 1.00 | 0.00   |
| C    |      |     |     |   |     |        |         |        |      |        |
| ATOM | 3377 | CG  | ASP | X | 271 | 41.527 | -86.995 | 41.659 | 1.00 | 0.00   |
| C    |      |     |     |   |     |        |         |        |      |        |
| ATOM | 3378 | OD1 | ASP | X | 271 | 42.553 | -87.353 | 42.233 | 1.00 | 0.00   |
| O    |      |     |     |   |     |        |         |        |      |        |
| ATOM | 3379 | OD2 | ASP | X | 271 | 40.717 | -87.869 | 40.989 | 1.00 | 0.00   |
| O1-  |      |     |     |   |     |        |         |        |      |        |
| ATOM | 3380 | N   | SER | X | 272 | 37.756 | -85.194 | 42.493 | 1.00 | 118.92 |
| N    |      |     |     |   |     |        |         |        |      |        |
| ATOM | 3381 | CA  | SER | X | 272 | 36.500 | -85.760 | 43.011 | 1.00 | 136.18 |
| C    |      |     |     |   |     |        |         |        |      |        |
| ATOM | 3382 | C   | SER | X | 272 | 35.269 | -85.360 | 42.151 | 1.00 | 133.93 |
| C    |      |     |     |   |     |        |         |        |      |        |
| ATOM | 3383 | O   | SER | X | 272 | 34.831 | -86.147 | 41.299 | 1.00 | 104.63 |
| O    |      |     |     |   |     |        |         |        |      |        |
| ATOM | 3384 | CB  | SER | X | 272 | 36.312 | -85.374 | 44.497 | 1.00 | 134.97 |
| C    |      |     |     |   |     |        |         |        |      |        |
| ATOM | 3385 | OG  | SER | X | 272 | 36.746 | -86.410 | 45.374 | 1.00 | 115.99 |
| O    |      |     |     |   |     |        |         |        |      |        |
| ATOM | 3386 | N   | LEU | X | 273 | 34.734 | -84.152 | 42.385 | 1.00 | 144.48 |
| N    |      |     |     |   |     |        |         |        |      |        |
| ATOM | 3387 | CA  | LEU | X | 273 | 33.584 | -83.595 | 41.639 | 1.00 | 127.23 |
| C    |      |     |     |   |     |        |         |        |      |        |
| ATOM | 3388 | C   | LEU | X | 273 | 33.809 | -82.072 | 41.483 | 1.00 | 131.63 |
| C    |      |     |     |   |     |        |         |        |      |        |
| ATOM | 3389 | O   | LEU | X | 273 | 34.944 | -81.609 | 41.661 | 1.00 | 149.88 |
| O    |      |     |     |   |     |        |         |        |      |        |
| ATOM | 3390 | CB  | LEU | X | 273 | 32.260 | -83.958 | 42.341 | 1.00 | 112.27 |
| C    |      |     |     |   |     |        |         |        |      |        |
| ATOM | 3391 | CG  | LEU | X | 273 | 32.190 | -83.802 | 43.864 | 1.00 | 101.34 |
| C    |      |     |     |   |     |        |         |        |      |        |
| ATOM | 3392 | CD1 | LEU | X | 273 | 32.675 | -82.429 | 44.299 | 1.00 | 104.14 |
| C    |      |     |     |   |     |        |         |        |      |        |

|      |      |     |     |   |     |        |         |        |      |        |
|------|------|-----|-----|---|-----|--------|---------|--------|------|--------|
| ATOM | 3393 | CD2 | LEU | X | 273 | 30.784 | -84.062 | 44.398 | 1.00 | 84.89  |
| C    |      |     |     |   |     |        |         |        |      |        |
| ATOM | 3394 | N   | PRO | X | 274 | 32.787 | -81.309 | 41.006 | 1.00 | 128.70 |
| N    |      |     |     |   |     |        |         |        |      |        |
| ATOM | 3395 | CA  | PRO | X | 274 | 33.164 | -79.948 | 40.591 | 1.00 | 130.24 |
| C    |      |     |     |   |     |        |         |        |      |        |
| ATOM | 3396 | C   | PRO | X | 274 | 33.604 | -79.068 | 41.763 | 1.00 | 151.81 |
| C    |      |     |     |   |     |        |         |        |      |        |
| ATOM | 3397 | O   | PRO | X | 274 | 33.231 | -79.313 | 42.914 | 1.00 | 154.99 |
| O    |      |     |     |   |     |        |         |        |      |        |
| ATOM | 3398 | CB  | PRO | X | 274 | 31.885 | -79.405 | 39.956 | 1.00 | 108.10 |
| C    |      |     |     |   |     |        |         |        |      |        |
| ATOM | 3399 | CG  | PRO | X | 274 | 30.790 | -80.117 | 40.667 | 1.00 | 105.65 |
| C    |      |     |     |   |     |        |         |        |      |        |
| ATOM | 3400 | CD  | PRO | X | 274 | 31.319 | -81.479 | 41.038 | 1.00 | 113.38 |
| C    |      |     |     |   |     |        |         |        |      |        |
| ATOM | 3401 | N   | SER | X | 275 | 34.420 | -78.057 | 41.450 | 1.00 | 147.31 |
| N    |      |     |     |   |     |        |         |        |      |        |
| ATOM | 3402 | CA  | SER | X | 275 | 34.892 | -77.062 | 42.428 | 1.00 | 145.16 |
| C    |      |     |     |   |     |        |         |        |      |        |
| ATOM | 3403 | C   | SER | X | 275 | 34.016 | -75.804 | 42.337 | 1.00 | 130.52 |
| C    |      |     |     |   |     |        |         |        |      |        |
| ATOM | 3404 | O   | SER | X | 275 | 33.818 | -75.093 | 43.321 | 1.00 | 166.16 |
| O    |      |     |     |   |     |        |         |        |      |        |
| ATOM | 3405 | CB  | SER | X | 275 | 36.358 | -76.641 | 42.134 | 1.00 | 139.04 |
| C    |      |     |     |   |     |        |         |        |      |        |
| ATOM | 3406 | OG  | SER | X | 275 | 37.160 | -77.699 | 41.620 | 1.00 | 108.70 |
| O    |      |     |     |   |     |        |         |        |      |        |
| ATOM | 3407 | N   | ASN | X | 276 | 33.545 | -75.554 | 41.126 | 1.00 | 117.87 |
| N    |      |     |     |   |     |        |         |        |      |        |
| ATOM | 3408 | CA  | ASN | X | 276 | 32.631 | -74.476 | 40.847 | 1.00 | 134.20 |
| C    |      |     |     |   |     |        |         |        |      |        |
| ATOM | 3409 | C   | ASN | X | 276 | 31.270 | -74.785 | 41.464 | 1.00 | 115.34 |
| C    |      |     |     |   |     |        |         |        |      |        |
| ATOM | 3410 | O   | ASN | X | 276 | 30.655 | -75.824 | 41.166 | 1.00 | 144.93 |
| O    |      |     |     |   |     |        |         |        |      |        |
| ATOM | 3411 | CB  | ASN | X | 276 | 32.531 | -74.269 | 39.330 | 1.00 | 169.59 |
| C    |      |     |     |   |     |        |         |        |      |        |
| ATOM | 3412 | CG  | ASN | X | 276 | 31.380 | -73.363 | 38.915 | 1.00 | 179.02 |
| C    |      |     |     |   |     |        |         |        |      |        |
| ATOM | 3413 | OD1 | ASN | X | 276 | 30.742 | -72.697 | 39.735 | 1.00 | 163.26 |
| O    |      |     |     |   |     |        |         |        |      |        |
| ATOM | 3414 | ND2 | ASN | X | 276 | 31.124 | -73.328 | 37.614 | 1.00 | 211.93 |
| N    |      |     |     |   |     |        |         |        |      |        |
| ATOM | 3415 | N   | PRO | X | 277 | 30.778 | -73.861 | 42.306 | 1.00 | 114.30 |
| N    |      |     |     |   |     |        |         |        |      |        |
| ATOM | 3416 | CA  | PRO | X | 277 | 29.452 | -73.959 | 42.927 | 1.00 | 111.56 |
| C    |      |     |     |   |     |        |         |        |      |        |
| ATOM | 3417 | C   | PRO | X | 277 | 28.301 | -74.159 | 41.932 | 1.00 | 106.62 |
| C    |      |     |     |   |     |        |         |        |      |        |
| ATOM | 3418 | O   | PRO | X | 277 | 27.400 | -74.915 | 42.224 | 1.00 | 91.32  |
| O    |      |     |     |   |     |        |         |        |      |        |
| ATOM | 3419 | CB  | PRO | X | 277 | 29.311 | -72.622 | 43.668 | 1.00 | 120.45 |
| C    |      |     |     |   |     |        |         |        |      |        |

|      |      |     |     |   |     |        |         |        |            |
|------|------|-----|-----|---|-----|--------|---------|--------|------------|
| ATOM | 3420 | CG  | PRO | X | 277 | 30.222 | -71.687 | 42.946 | 1.00122.74 |
| C    |      |     |     |   |     |        |         |        |            |
| ATOM | 3421 | CD  | PRO | X | 277 | 31.394 | -72.544 | 42.566 | 1.00126.87 |
| C    |      |     |     |   |     |        |         |        |            |
| ATOM | 3422 | N   | ILE | X | 278 | 28.334 | -73.500 | 40.783 | 1.00111.18 |
| N    |      |     |     |   |     |        |         |        |            |
| ATOM | 3423 | CA  | ILE | X | 278 | 27.346 | -73.694 | 39.728 | 1.00111.66 |
| C    |      |     |     |   |     |        |         |        |            |
| ATOM | 3424 | C   | ILE | X | 278 | 27.185 | -75.195 | 39.394 | 1.00117.68 |
| C    |      |     |     |   |     |        |         |        |            |
| ATOM | 3425 | O   | ILE | X | 278 | 26.077 | -75.760 | 39.427 | 1.00134.85 |
| O    |      |     |     |   |     |        |         |        |            |
| ATOM | 3426 | CB  | ILE | X | 278 | 27.797 | -72.947 | 38.468 | 1.00118.90 |
| C    |      |     |     |   |     |        |         |        |            |
| ATOM | 3427 | CG1 | ILE | X | 278 | 27.989 | -71.459 | 38.790 | 1.00124.93 |
| C    |      |     |     |   |     |        |         |        |            |
| ATOM | 3428 | CG2 | ILE | X | 278 | 26.800 | -73.143 | 37.344 | 1.00139.37 |
| C    |      |     |     |   |     |        |         |        |            |
| ATOM | 3429 | CD1 | ILE | X | 278 | 28.823 | -70.697 | 37.785 | 1.00134.37 |
| C    |      |     |     |   |     |        |         |        |            |
| ATOM | 3430 | N   | ASP | X | 279 | 28.300 | -75.837 | 39.096 | 1.00129.03 |
| N    |      |     |     |   |     |        |         |        |            |
| ATOM | 3431 | CA  | ASP | X | 279 | 28.254 | -77.232 | 38.709 | 1.00128.02 |
| C    |      |     |     |   |     |        |         |        |            |
| ATOM | 3432 | C   | ASP | X | 279 | 27.803 | -78.113 | 39.864 | 1.00111.12 |
| C    |      |     |     |   |     |        |         |        |            |
| ATOM | 3433 | O   | ASP | X | 279 | 26.914 | -78.934 | 39.709 | 1.00114.22 |
| O    |      |     |     |   |     |        |         |        |            |
| ATOM | 3434 | CB  | ASP | X | 279 | 29.551 | -77.652 | 38.037 | 1.00150.79 |
| C    |      |     |     |   |     |        |         |        |            |
| ATOM | 3435 | CG  | ASP | X | 279 | 29.662 | -77.090 | 36.612 | 1.00163.54 |
| C    |      |     |     |   |     |        |         |        |            |
| ATOM | 3436 | OD1 | ASP | X | 279 | 29.817 | -75.859 | 36.457 | 1.00120.64 |
| O    |      |     |     |   |     |        |         |        |            |
| ATOM | 3437 | OD2 | ASP | X | 279 | 29.477 | -77.864 | 35.650 | 1.00220.93 |
| O1-  |      |     |     |   |     |        |         |        |            |
| ATOM | 3438 | N   | PHE | X | 280 | 28.399 | -77.905 | 41.022 | 1.00113.20 |
| N    |      |     |     |   |     |        |         |        |            |
| ATOM | 3439 | CA  | PHE | X | 280 | 28.075 | -78.676 | 42.197 | 1.00109.51 |
| C    |      |     |     |   |     |        |         |        |            |
| ATOM | 3440 | C   | PHE | X | 280 | 26.582 | -78.641 | 42.436 | 1.00105.61 |
| C    |      |     |     |   |     |        |         |        |            |
| ATOM | 3441 | O   | PHE | X | 280 | 25.973 | -79.665 | 42.597 | 1.00134.32 |
| O    |      |     |     |   |     |        |         |        |            |
| ATOM | 3442 | CB  | PHE | X | 280 | 28.809 | -78.131 | 43.424 | 1.00106.72 |
| C    |      |     |     |   |     |        |         |        |            |
| ATOM | 3443 | CG  | PHE | X | 280 | 28.751 | -79.045 | 44.603 | 1.00 90.10 |
| C    |      |     |     |   |     |        |         |        |            |
| ATOM | 3444 | CD1 | PHE | X | 280 | 27.553 | -79.271 | 45.252 | 1.00 88.94 |
| C    |      |     |     |   |     |        |         |        |            |
| ATOM | 3445 | CD2 | PHE | X | 280 | 29.864 | -79.760 | 44.996 | 1.00 94.40 |
| C    |      |     |     |   |     |        |         |        |            |
| ATOM | 3446 | CE1 | PHE | X | 280 | 27.477 | -80.150 | 46.306 | 1.00103.37 |
| C    |      |     |     |   |     |        |         |        |            |

|      |      |     |     |   |     |        |         |        |            |
|------|------|-----|-----|---|-----|--------|---------|--------|------------|
| ATOM | 3447 | CE2 | PHE | X | 280 | 29.788 | -80.664 | 46.039 | 1.00112.94 |
| C    |      |     |     |   |     |        |         |        |            |
| ATOM | 3448 | CZ  | PHE | X | 280 | 28.593 | -80.857 | 46.698 | 1.00113.26 |
| C    |      |     |     |   |     |        |         |        |            |
| ATOM | 3449 | N   | SER | X | 281 | 26.006 | -77.446 | 42.413 | 1.00 88.74 |
| N    |      |     |     |   |     |        |         |        |            |
| ATOM | 3450 | CA  | SER | X | 281 | 24.581 | -77.219 | 42.695 | 1.00100.92 |
| C    |      |     |     |   |     |        |         |        |            |
| ATOM | 3451 | C   | SER | X | 281 | 23.675 | -77.944 | 41.716 | 1.00126.16 |
| C    |      |     |     |   |     |        |         |        |            |
| ATOM | 3452 | O   | SER | X | 281 | 22.610 | -78.420 | 42.092 | 1.00129.67 |
| O    |      |     |     |   |     |        |         |        |            |
| ATOM | 3453 | CB  | SER | X | 281 | 24.255 | -75.722 | 42.602 | 1.00100.88 |
| C    |      |     |     |   |     |        |         |        |            |
| ATOM | 3454 | OG  | SER | X | 281 | 24.260 | -75.260 | 41.259 | 1.00 82.60 |
| O    |      |     |     |   |     |        |         |        |            |
| ATOM | 3455 | N   | TYR | X | 282 | 24.111 | -78.019 | 40.458 | 1.00136.70 |
| N    |      |     |     |   |     |        |         |        |            |
| ATOM | 3456 | CA  | TYR | X | 282 | 23.399 | -78.791 | 39.417 | 1.00 97.27 |
| C    |      |     |     |   |     |        |         |        |            |
| ATOM | 3457 | C   | TYR | X | 282 | 23.590 | -80.326 | 39.499 | 1.00 90.42 |
| C    |      |     |     |   |     |        |         |        |            |
| ATOM | 3458 | O   | TYR | X | 282 | 22.708 | -81.091 | 39.124 | 1.00 99.68 |
| O    |      |     |     |   |     |        |         |        |            |
| ATOM | 3459 | CB  | TYR | X | 282 | 23.845 | -78.372 | 38.035 | 1.00 80.31 |
| C    |      |     |     |   |     |        |         |        |            |
| ATOM | 3460 | CG  | TYR | X | 282 | 23.419 | -77.008 | 37.586 | 1.00 61.87 |
| C    |      |     |     |   |     |        |         |        |            |
| ATOM | 3461 | CD1 | TYR | X | 282 | 22.067 | -76.658 | 37.486 | 1.00 52.68 |
| C    |      |     |     |   |     |        |         |        |            |
| ATOM | 3462 | CD2 | TYR | X | 282 | 24.356 | -76.146 | 37.052 | 1.00 63.01 |
| C    |      |     |     |   |     |        |         |        |            |
| ATOM | 3463 | CE1 | TYR | X | 282 | 21.683 | -75.433 | 36.958 | 1.00 53.56 |
| C    |      |     |     |   |     |        |         |        |            |
| ATOM | 3464 | CE2 | TYR | X | 282 | 23.987 | -74.933 | 36.526 | 1.00 73.85 |
| C    |      |     |     |   |     |        |         |        |            |
| ATOM | 3465 | CZ  | TYR | X | 282 | 22.659 | -74.576 | 36.483 | 1.00 63.69 |
| C    |      |     |     |   |     |        |         |        |            |
| ATOM | 3466 | OH  | TYR | X | 282 | 22.371 | -73.355 | 35.934 | 1.00 82.68 |
| O    |      |     |     |   |     |        |         |        |            |
| ATOM | 3467 | N   | ARG | X | 283 | 24.764 | -80.750 | 39.947 | 1.00 93.41 |
| N    |      |     |     |   |     |        |         |        |            |
| ATOM | 3468 | CA  | ARG | X | 283 | 25.072 | -82.158 | 40.165 | 1.00 97.75 |
| C    |      |     |     |   |     |        |         |        |            |
| ATOM | 3469 | C   | ARG | X | 283 | 24.224 | -82.763 | 41.304 | 1.00 89.84 |
| C    |      |     |     |   |     |        |         |        |            |
| ATOM | 3470 | O   | ARG | X | 283 | 23.719 | -83.866 | 41.183 | 1.00113.58 |
| O    |      |     |     |   |     |        |         |        |            |
| ATOM | 3471 | CB  | ARG | X | 283 | 26.585 | -82.287 | 40.436 | 1.00 99.40 |
| C    |      |     |     |   |     |        |         |        |            |
| ATOM | 3472 | CG  | ARG | X | 283 | 27.023 | -83.525 | 41.180 | 1.00112.26 |
| C    |      |     |     |   |     |        |         |        |            |
| ATOM | 3473 | CD  | ARG | X | 283 | 26.788 | -84.791 | 40.382 | 1.00119.69 |
| C    |      |     |     |   |     |        |         |        |            |

|      |      |     |     |   |     |        |         |        |            |
|------|------|-----|-----|---|-----|--------|---------|--------|------------|
| ATOM | 3474 | NE  | ARG | X | 283 | 27.272 | -85.944 | 41.123 | 1.00132.76 |
| N    |      |     |     |   |     |        |         |        |            |
| ATOM | 3475 | CZ  | ARG | X | 283 | 28.558 | -86.266 | 41.251 | 1.00140.74 |
| C    |      |     |     |   |     |        |         |        |            |
| ATOM | 3476 | NH1 | ARG | X | 283 | 28.900 | -87.307 | 42.000 | 1.00133.38 |
| N    |      |     |     |   |     |        |         |        |            |
| ATOM | 3477 | NH2 | ARG | X | 283 | 29.506 | -85.551 | 40.639 | 1.00128.75 |
| N1+  |      |     |     |   |     |        |         |        |            |
| ATOM | 3478 | N   | VAL | X | 284 | 24.076 | -82.050 | 42.406 | 1.00 92.65 |
| N    |      |     |     |   |     |        |         |        |            |
| ATOM | 3479 | CA  | VAL | X | 284 | 23.256 | -82.555 | 43.508 | 1.00105.35 |
| C    |      |     |     |   |     |        |         |        |            |
| ATOM | 3480 | C   | VAL | X | 284 | 21.785 | -82.349 | 43.244 | 1.00 97.35 |
| C    |      |     |     |   |     |        |         |        |            |
| ATOM | 3481 | O   | VAL | X | 284 | 20.952 | -83.063 | 43.781 | 1.00100.23 |
| O    |      |     |     |   |     |        |         |        |            |
| ATOM | 3482 | CB  | VAL | X | 284 | 23.641 | -81.925 | 44.843 | 1.00125.40 |
| C    |      |     |     |   |     |        |         |        |            |
| ATOM | 3483 | CG1 | VAL | X | 284 | 25.129 | -82.111 | 45.089 | 1.00145.29 |
| C    |      |     |     |   |     |        |         |        |            |
| ATOM | 3484 | CG2 | VAL | X | 284 | 23.271 | -80.459 | 44.869 | 1.00120.89 |
| C    |      |     |     |   |     |        |         |        |            |
| ATOM | 3485 | N   | ALA | X | 285 | 21.462 | -81.383 | 42.403 | 1.00 97.21 |
| N    |      |     |     |   |     |        |         |        |            |
| ATOM | 3486 | CA  | ALA | X | 285 | 20.092 | -81.179 | 41.948 | 1.00103.98 |
| C    |      |     |     |   |     |        |         |        |            |
| ATOM | 3487 | C   | ALA | X | 285 | 19.546 | -82.452 | 41.305 | 1.00 94.69 |
| C    |      |     |     |   |     |        |         |        |            |
| ATOM | 3488 | O   | ALA | X | 285 | 18.410 | -82.858 | 41.569 | 1.00 80.75 |
| O    |      |     |     |   |     |        |         |        |            |
| ATOM | 3489 | CB  | ALA | X | 285 | 20.035 | -80.028 | 40.959 | 1.00 93.15 |
| C    |      |     |     |   |     |        |         |        |            |
| ATOM | 3490 | N   | ALA | X | 286 | 20.359 | -83.085 | 40.469 | 1.00 88.64 |
| N    |      |     |     |   |     |        |         |        |            |
| ATOM | 3491 | CA  | ALA | X | 286 | 19.957 | -84.322 | 39.782 | 1.00 89.76 |
| C    |      |     |     |   |     |        |         |        |            |
| ATOM | 3492 | C   | ALA | X | 286 | 19.935 | -85.558 | 40.685 | 1.00 94.69 |
| C    |      |     |     |   |     |        |         |        |            |
| ATOM | 3493 | O   | ALA | X | 286 | 19.275 | -86.537 | 40.373 | 1.00130.19 |
| O    |      |     |     |   |     |        |         |        |            |
| ATOM | 3494 | CB  | ALA | X | 286 | 20.873 | -84.574 | 38.608 | 1.00 89.31 |
| C    |      |     |     |   |     |        |         |        |            |
| ATOM | 3495 | N   | CYS | X | 287 | 20.666 | -85.519 | 41.793 | 1.00 85.04 |
| N    |      |     |     |   |     |        |         |        |            |
| ATOM | 3496 | CA  | CYS | X | 287 | 20.649 | -86.601 | 42.805 | 1.00 92.31 |
| C    |      |     |     |   |     |        |         |        |            |
| ATOM | 3497 | C   | CYS | X | 287 | 19.365 | -86.604 | 43.631 | 1.00 89.60 |
| C    |      |     |     |   |     |        |         |        |            |
| ATOM | 3498 | O   | CYS | X | 287 | 18.883 | -87.624 | 44.083 | 1.00 80.22 |
| O    |      |     |     |   |     |        |         |        |            |
| ATOM | 3499 | CB  | CYS | X | 287 | 21.831 | -86.427 | 43.778 | 1.00100.62 |
| C    |      |     |     |   |     |        |         |        |            |
| ATOM | 3500 | SG  | CYS | X | 287 | 23.489 | -86.452 | 43.037 | 1.00131.78 |
| S    |      |     |     |   |     |        |         |        |            |

|      |      |     |     |   |     |        |         |        |            |
|------|------|-----|-----|---|-----|--------|---------|--------|------------|
| ATOM | 3501 | N   | LEU | X | 288 | 18.816 | -85.422 | 43.864 | 1.00108.43 |
| N    |      |     |     |   |     |        |         |        |            |
| ATOM | 3502 | CA  | LEU | X | 288 | 17.594 | -85.230 | 44.588 | 1.00 96.83 |
| C    |      |     |     |   |     |        |         |        |            |
| ATOM | 3503 | C   | LEU | X | 288 | 16.385 | -85.870 | 43.956 | 1.00 68.93 |
| C    |      |     |     |   |     |        |         |        |            |
| ATOM | 3504 | O   | LEU | X | 288 | 15.930 | -85.374 | 42.966 | 1.00 63.92 |
| O    |      |     |     |   |     |        |         |        |            |
| ATOM | 3505 | CB  | LEU | X | 288 | 17.241 | -83.747 | 44.624 | 1.00123.19 |
| C    |      |     |     |   |     |        |         |        |            |
| ATOM | 3506 | CG  | LEU | X | 288 | 17.976 | -82.840 | 45.585 | 1.00130.12 |
| C    |      |     |     |   |     |        |         |        |            |
| ATOM | 3507 | CD1 | LEU | X | 288 | 17.265 | -81.495 | 45.574 | 1.00139.08 |
| C    |      |     |     |   |     |        |         |        |            |
| ATOM | 3508 | CD2 | LEU | X | 288 | 18.010 | -83.442 | 46.979 | 1.00120.42 |
| C    |      |     |     |   |     |        |         |        |            |
| ATOM | 3509 | N   | PRO | X | 289 | 15.804 | -86.887 | 44.606 | 1.00 83.43 |
| N    |      |     |     |   |     |        |         |        |            |
| ATOM | 3510 | CA  | PRO | X | 289 | 14.508 | -87.426 | 44.201 | 1.00 95.77 |
| C    |      |     |     |   |     |        |         |        |            |
| ATOM | 3511 | C   | PRO | X | 289 | 13.376 | -86.491 | 44.594 | 1.00 90.80 |
| C    |      |     |     |   |     |        |         |        |            |
| ATOM | 3512 | O   | PRO | X | 289 | 12.907 | -86.542 | 45.739 | 1.00132.92 |
| O    |      |     |     |   |     |        |         |        |            |
| ATOM | 3513 | CB  | PRO | X | 289 | 14.419 | -88.692 | 45.029 | 1.00110.37 |
| C    |      |     |     |   |     |        |         |        |            |
| ATOM | 3514 | CG  | PRO | X | 289 | 15.128 | -88.325 | 46.321 | 1.00124.45 |
| C    |      |     |     |   |     |        |         |        |            |
| ATOM | 3515 | CD  | PRO | X | 289 | 16.099 | -87.211 | 46.011 | 1.00104.70 |
| C    |      |     |     |   |     |        |         |        |            |
| ATOM | 3516 | N   | ILE | X | 290 | 12.997 | -85.599 | 43.695 | 1.00 70.17 |
| N    |      |     |     |   |     |        |         |        |            |
| ATOM | 3517 | CA  | ILE | X | 290 | 11.925 | -84.651 | 43.963 | 1.00 84.69 |
| C    |      |     |     |   |     |        |         |        |            |
| ATOM | 3518 | C   | ILE | X | 290 | 10.898 | -84.707 | 42.842 | 1.00 84.78 |
| C    |      |     |     |   |     |        |         |        |            |
| ATOM | 3519 | O   | ILE | X | 290 | 11.034 | -85.515 | 41.930 | 1.00109.92 |
| O    |      |     |     |   |     |        |         |        |            |
| ATOM | 3520 | CB  | ILE | X | 290 | 12.440 | -83.200 | 44.121 | 1.00102.22 |
| C    |      |     |     |   |     |        |         |        |            |
| ATOM | 3521 | CG1 | ILE | X | 290 | 13.646 | -82.925 | 43.215 | 1.00110.75 |
| C    |      |     |     |   |     |        |         |        |            |
| ATOM | 3522 | CG2 | ILE | X | 290 | 12.799 | -82.928 | 45.564 | 1.00 98.35 |
| C    |      |     |     |   |     |        |         |        |            |
| ATOM | 3523 | CD1 | ILE | X | 290 | 13.911 | -81.446 | 43.000 | 1.00 97.63 |
| C    |      |     |     |   |     |        |         |        |            |
| ATOM | 3524 | N   | ASP | X | 291 | 9.842  | -83.902 | 42.944 | 1.00 82.93 |
| N    |      |     |     |   |     |        |         |        |            |
| ATOM | 3525 | CA  | ASP | X | 291 | 8.739  | -84.008 | 41.992 | 1.00103.31 |
| C    |      |     |     |   |     |        |         |        |            |
| ATOM | 3526 | C   | ASP | X | 291 | 8.776  | -82.912 | 40.907 | 1.00103.98 |
| C    |      |     |     |   |     |        |         |        |            |
| ATOM | 3527 | O   | ASP | X | 291 | 9.267  | -81.810 | 41.137 | 1.00 96.95 |
| O    |      |     |     |   |     |        |         |        |            |

|      |      |     |     |   |     |        |         |        |            |
|------|------|-----|-----|---|-----|--------|---------|--------|------------|
| ATOM | 3528 | CB  | ASP | X | 291 | 7.374  | -84.187 | 42.726 | 1.00116.06 |
| C    |      |     |     |   |     |        |         |        |            |
| ATOM | 3529 | CG  | ASP | X | 291 | 6.622  | -82.880 | 42.965 | 1.00133.73 |
| C    |      |     |     |   |     |        |         |        |            |
| ATOM | 3530 | OD1 | ASP | X | 291 | 5.973  | -82.364 | 42.019 | 1.00112.38 |
| O    |      |     |     |   |     |        |         |        |            |
| ATOM | 3531 | OD2 | ASP | X | 291 | 6.537  | -82.464 | 44.141 | 1.00154.94 |
| O1-  |      |     |     |   |     |        |         |        |            |
| ATOM | 3532 | N   | ASP | X | 292 | 8.343  | -83.284 | 39.698 | 1.00132.50 |
| N    |      |     |     |   |     |        |         |        |            |
| ATOM | 3533 | CA  | ASP | X | 292 | 8.536  | -82.454 | 38.516 | 1.00132.34 |
| C    |      |     |     |   |     |        |         |        |            |
| ATOM | 3534 | C   | ASP | X | 292 | 8.216  | -80.954 | 38.753 | 1.00120.50 |
| C    |      |     |     |   |     |        |         |        |            |
| ATOM | 3535 | O   | ASP | X | 292 | 8.826  | -80.093 | 38.119 | 1.00130.29 |
| O    |      |     |     |   |     |        |         |        |            |
| ATOM | 3536 | CB  | ASP | X | 292 | 7.632  | -82.965 | 37.353 | 1.00 0.00  |
| C    |      |     |     |   |     |        |         |        |            |
| ATOM | 3537 | CG  | ASP | X | 292 | 6.141  | -83.037 | 37.701 | 1.00 0.00  |
| C    |      |     |     |   |     |        |         |        |            |
| ATOM | 3538 | OD1 | ASP | X | 292 | 5.620  | -84.005 | 38.251 | 1.00 0.00  |
| O    |      |     |     |   |     |        |         |        |            |
| ATOM | 3539 | OD2 | ASP | X | 292 | 5.431  | -81.927 | 37.338 | 1.00 0.00  |
| O1-  |      |     |     |   |     |        |         |        |            |
| ATOM | 3540 | N   | VAL | X | 293 | 7.305  | -80.638 | 39.676 | 1.00106.23 |
| N    |      |     |     |   |     |        |         |        |            |
| ATOM | 3541 | CA  | VAL | X | 293 | 6.975  | -79.238 | 39.938 | 1.00115.59 |
| C    |      |     |     |   |     |        |         |        |            |
| ATOM | 3542 | C   | VAL | X | 293 | 8.005  | -78.522 | 40.820 | 1.00105.74 |
| C    |      |     |     |   |     |        |         |        |            |
| ATOM | 3543 | O   | VAL | X | 293 | 8.283  | -77.351 | 40.616 | 1.00113.83 |
| O    |      |     |     |   |     |        |         |        |            |
| ATOM | 3544 | CB  | VAL | X | 293 | 5.526  | -79.047 | 40.476 | 1.00124.21 |
| C    |      |     |     |   |     |        |         |        |            |
| ATOM | 3545 | CG1 | VAL | X | 293 | 5.478  | -79.052 | 42.000 | 1.00128.10 |
| C    |      |     |     |   |     |        |         |        |            |
| ATOM | 3546 | CG2 | VAL | X | 293 | 4.920  | -77.757 | 39.918 | 1.00114.92 |
| C    |      |     |     |   |     |        |         |        |            |
| ATOM | 3547 | N   | LEU | X | 294 | 8.572  | -79.230 | 41.785 | 1.00100.93 |
| N    |      |     |     |   |     |        |         |        |            |
| ATOM | 3548 | CA  | LEU | X | 294 | 9.698  | -78.745 | 42.593 | 1.00100.86 |
| C    |      |     |     |   |     |        |         |        |            |
| ATOM | 3549 | C   | LEU | X | 294 | 11.011 | -78.679 | 41.806 | 1.00104.48 |
| C    |      |     |     |   |     |        |         |        |            |
| ATOM | 3550 | O   | LEU | X | 294 | 11.834 | -77.792 | 42.036 | 1.00118.45 |
| O    |      |     |     |   |     |        |         |        |            |
| ATOM | 3551 | CB  | LEU | X | 294 | 9.967  | -79.771 | 43.699 | 1.00103.77 |
| C    |      |     |     |   |     |        |         |        |            |
| ATOM | 3552 | CG  | LEU | X | 294 | 9.649  | -79.498 | 45.155 | 1.00 94.36 |
| C    |      |     |     |   |     |        |         |        |            |
| ATOM | 3553 | CD1 | LEU | X | 294 | 10.975 | -79.438 | 45.905 | 1.00 97.28 |
| C    |      |     |     |   |     |        |         |        |            |
| ATOM | 3554 | CD2 | LEU | X | 294 | 8.798  | -78.244 | 45.348 | 1.00 96.64 |
| C    |      |     |     |   |     |        |         |        |            |

|      |      |     |     |   |     |        |         |        |            |
|------|------|-----|-----|---|-----|--------|---------|--------|------------|
| ATOM | 3555 | N   | ARG | X | 295 | 11.230 | -79.652 | 40.925 | 1.00109.19 |
| N    |      |     |     |   |     |        |         |        |            |
| ATOM | 3556 | CA  | ARG | X | 295 | 12.446 | -79.689 | 40.100 | 1.00 99.86 |
| C    |      |     |     |   |     |        |         |        |            |
| ATOM | 3557 | C   | ARG | X | 295 | 12.521 | -78.462 | 39.180 | 1.00 94.97 |
| C    |      |     |     |   |     |        |         |        |            |
| ATOM | 3558 | O   | ARG | X | 295 | 13.624 | -77.929 | 38.926 | 1.00 94.05 |
| O    |      |     |     |   |     |        |         |        |            |
| ATOM | 3559 | CB  | ARG | X | 295 | 12.437 | -81.002 | 39.304 | 1.00 96.60 |
| C    |      |     |     |   |     |        |         |        |            |
| ATOM | 3560 | CG  | ARG | X | 295 | 13.591 | -81.244 | 38.344 | 1.00 88.42 |
| C    |      |     |     |   |     |        |         |        |            |
| ATOM | 3561 | CD  | ARG | X | 295 | 14.906 | -81.593 | 39.035 | 1.00 94.19 |
| C    |      |     |     |   |     |        |         |        |            |
| ATOM | 3562 | NE  | ARG | X | 295 | 15.055 | -83.000 | 39.448 | 1.00 96.15 |
| N    |      |     |     |   |     |        |         |        |            |
| ATOM | 3563 | CZ  | ARG | X | 295 | 15.070 | -84.058 | 38.631 | 1.00 88.46 |
| C    |      |     |     |   |     |        |         |        |            |
| ATOM | 3564 | NH1 | ARG | X | 295 | 14.805 | -83.939 | 37.337 | 1.00 82.51 |
| N    |      |     |     |   |     |        |         |        |            |
| ATOM | 3565 | NH2 | ARG | X | 295 | 15.274 | -85.266 | 39.138 | 1.00 94.47 |
| N1+  |      |     |     |   |     |        |         |        |            |
| ATOM | 3566 | N   | ILE | X | 296 | 11.355 | -77.992 | 38.706 | 1.00 95.91 |
| N    |      |     |     |   |     |        |         |        |            |
| ATOM | 3567 | CA  | ILE | X | 296 | 11.338 | -76.787 | 37.866 | 1.00108.20 |
| C    |      |     |     |   |     |        |         |        |            |
| ATOM | 3568 | C   | ILE | X | 296 | 11.707 | -75.541 | 38.649 | 1.00120.03 |
| C    |      |     |     |   |     |        |         |        |            |
| ATOM | 3569 | O   | ILE | X | 296 | 12.243 | -74.579 | 38.089 | 1.00158.35 |
| O    |      |     |     |   |     |        |         |        |            |
| ATOM | 3570 | CB  | ILE | X | 296 | 9.986  | -76.312 | 37.257 | 1.00116.60 |
| C    |      |     |     |   |     |        |         |        |            |
| ATOM | 3571 | CG1 | ILE | X | 296 | 8.734  | -77.096 | 37.666 | 1.00160.77 |
| C    |      |     |     |   |     |        |         |        |            |
| ATOM | 3572 | CG2 | ILE | X | 296 | 10.151 | -75.637 | 35.893 | 1.00104.72 |
| C    |      |     |     |   |     |        |         |        |            |
| ATOM | 3573 | CD1 | ILE | X | 296 | 7.454  | -76.567 | 37.027 | 1.00180.38 |
| C    |      |     |     |   |     |        |         |        |            |
| ATOM | 3574 | N   | GLN | X | 297 | 11.417 | -75.553 | 39.947 | 1.00118.35 |
| N    |      |     |     |   |     |        |         |        |            |
| ATOM | 3575 | CA  | GLN | X | 297 | 11.751 | -74.446 | 40.854 | 1.00101.40 |
| C    |      |     |     |   |     |        |         |        |            |
| ATOM | 3576 | C   | GLN | X | 297 | 13.239 | -74.206 | 40.986 | 1.00 96.61 |
| C    |      |     |     |   |     |        |         |        |            |
| ATOM | 3577 | O   | GLN | X | 297 | 13.679 | -73.097 | 40.768 | 1.00125.81 |
| O    |      |     |     |   |     |        |         |        |            |
| ATOM | 3578 | CB  | GLN | X | 297 | 11.126 | -74.670 | 42.235 | 1.00111.77 |
| C    |      |     |     |   |     |        |         |        |            |
| ATOM | 3579 | CG  | GLN | X | 297 | 10.225 | -73.535 | 42.716 | 1.00121.31 |
| C    |      |     |     |   |     |        |         |        |            |
| ATOM | 3580 | CD  | GLN | X | 297 | 9.699  | -73.770 | 44.129 | 1.00141.13 |
| C    |      |     |     |   |     |        |         |        |            |
| ATOM | 3581 | OE1 | GLN | X | 297 | 10.447 | -73.674 | 45.102 | 1.00146.24 |
| O    |      |     |     |   |     |        |         |        |            |



|      |      |     |     |   |     |        |         |        |            |
|------|------|-----|-----|---|-----|--------|---------|--------|------------|
| ATOM | 3582 | NE2 | GLN | X | 297 | 8.416  | -74.121 | 44.244 | 1.00149.61 |
| N    |      |     |     |   |     |        |         |        |            |
| ATOM | 3583 | N   | LEU | X | 298 | 14.010 | -75.240 | 41.348 | 1.00 95.25 |
| N    |      |     |     |   |     |        |         |        |            |
| ATOM | 3584 | CA  | LEU | X | 298 | 15.472 | -75.175 | 41.461 | 1.00100.04 |
| C    |      |     |     |   |     |        |         |        |            |
| ATOM | 3585 | C   | LEU | X | 298 | 16.086 | -74.693 | 40.160 | 1.00116.04 |
| C    |      |     |     |   |     |        |         |        |            |
| ATOM | 3586 | O   | LEU | X | 298 | 17.014 | -73.859 | 40.113 | 1.00132.78 |
| O    |      |     |     |   |     |        |         |        |            |
| ATOM | 3587 | CB  | LEU | X | 298 | 16.020 | -76.588 | 41.611 | 1.00 91.91 |
| C    |      |     |     |   |     |        |         |        |            |
| ATOM | 3588 | CG  | LEU | X | 298 | 16.309 | -77.199 | 42.964 | 1.00 87.60 |
| C    |      |     |     |   |     |        |         |        |            |
| ATOM | 3589 | CD1 | LEU | X | 298 | 15.476 | -78.462 | 43.139 | 1.00106.32 |
| C    |      |     |     |   |     |        |         |        |            |
| ATOM | 3590 | CD2 | LEU | X | 298 | 17.784 | -77.535 | 43.054 | 1.00 82.31 |
| C    |      |     |     |   |     |        |         |        |            |
| ATOM | 3591 | N   | LEU | X | 299 | 15.599 | -75.325 | 39.098 | 1.00107.27 |
| N    |      |     |     |   |     |        |         |        |            |
| ATOM | 3592 | CA  | LEU | X | 299 | 16.019 | -75.013 | 37.754 | 1.00116.55 |
| C    |      |     |     |   |     |        |         |        |            |
| ATOM | 3593 | C   | LEU | X | 299 | 15.790 | -73.521 | 37.461 | 1.00115.60 |
| C    |      |     |     |   |     |        |         |        |            |
| ATOM | 3594 | O   | LEU | X | 299 | 16.680 | -72.843 | 36.886 | 1.00102.84 |
| O    |      |     |     |   |     |        |         |        |            |
| ATOM | 3595 | CB  | LEU | X | 299 | 15.223 | -75.891 | 36.751 | 1.00147.38 |
| C    |      |     |     |   |     |        |         |        |            |
| ATOM | 3596 | CG  | LEU | X | 299 | 15.715 | -76.286 | 35.332 | 1.00150.20 |
| C    |      |     |     |   |     |        |         |        |            |
| ATOM | 3597 | CD1 | LEU | X | 299 | 15.482 | -75.212 | 34.243 | 1.00116.85 |
| C    |      |     |     |   |     |        |         |        |            |
| ATOM | 3598 | CD2 | LEU | X | 299 | 17.159 | -76.771 | 35.376 | 1.00151.82 |
| C    |      |     |     |   |     |        |         |        |            |
| ATOM | 3599 | N   | LYS | X | 300 | 14.635 | -73.005 | 37.889 | 1.00108.42 |
| N    |      |     |     |   |     |        |         |        |            |
| ATOM | 3600 | CA  | LYS | X | 300 | 14.363 | -71.579 | 37.747 | 1.00105.15 |
| C    |      |     |     |   |     |        |         |        |            |
| ATOM | 3601 | C   | LYS | X | 300 | 15.291 | -70.706 | 38.599 | 1.00102.40 |
| C    |      |     |     |   |     |        |         |        |            |
| ATOM | 3602 | O   | LYS | X | 300 | 15.469 | -69.534 | 38.282 | 1.00134.99 |
| O    |      |     |     |   |     |        |         |        |            |
| ATOM | 3603 | CB  | LYS | X | 300 | 12.879 | -71.246 | 37.935 | 1.00123.45 |
| C    |      |     |     |   |     |        |         |        |            |
| ATOM | 3604 | CG  | LYS | X | 300 | 12.098 | -71.263 | 36.614 | 1.00124.53 |
| C    |      |     |     |   |     |        |         |        |            |
| ATOM | 3605 | CD  | LYS | X | 300 | 10.656 | -70.803 | 36.776 | 1.00131.12 |
| C    |      |     |     |   |     |        |         |        |            |
| ATOM | 3606 | CE  | LYS | X | 300 | 9.808  | -71.832 | 37.510 | 1.00149.04 |
| C    |      |     |     |   |     |        |         |        |            |
| ATOM | 3607 | NZ  | LYS | X | 300 | 8.953  | -71.208 | 38.560 | 1.00166.96 |
| N1+  |      |     |     |   |     |        |         |        |            |
| ATOM | 3608 | N   | ILE | X | 301 | 15.899 | -71.277 | 39.646 | 1.00117.43 |
| N    |      |     |     |   |     |        |         |        |            |

|      |      |     |     |   |     |        |         |        |            |
|------|------|-----|-----|---|-----|--------|---------|--------|------------|
| ATOM | 3609 | CA  | ILE | X | 301 | 16.745 | -70.518 | 40.568 | 1.00110.68 |
| C    |      |     |     |   |     |        |         |        |            |
| ATOM | 3610 | C   | ILE | X | 301 | 18.106 | -70.155 | 39.945 | 1.00118.06 |
| C    |      |     |     |   |     |        |         |        |            |
| ATOM | 3611 | O   | ILE | X | 301 | 18.805 | -71.015 | 39.348 | 1.00154.14 |
| O    |      |     |     |   |     |        |         |        |            |
| ATOM | 3612 | CB  | ILE | X | 301 | 16.882 | -71.260 | 41.896 | 1.00115.60 |
| C    |      |     |     |   |     |        |         |        |            |
| ATOM | 3613 | CG1 | ILE | X | 301 | 15.768 | -70.782 | 42.840 | 1.00120.65 |
| C    |      |     |     |   |     |        |         |        |            |
| ATOM | 3614 | CG2 | ILE | X | 301 | 18.281 | -71.080 | 42.472 | 1.00131.67 |
| C    |      |     |     |   |     |        |         |        |            |
| ATOM | 3615 | CD1 | ILE | X | 301 | 15.656 | -71.559 | 44.138 | 1.00122.74 |
| C    |      |     |     |   |     |        |         |        |            |
| ATOM | 3616 | N   | GLY | X | 302 | 18.464 | -68.873 | 40.055 | 1.00 91.49 |
| N    |      |     |     |   |     |        |         |        |            |
| ATOM | 3617 | CA  | GLY | X | 302 | 19.535 | -68.316 | 39.237 | 1.00 95.64 |
| C    |      |     |     |   |     |        |         |        |            |
| ATOM | 3618 | C   | GLY | X | 302 | 20.862 | -68.179 | 39.939 | 1.00115.60 |
| C    |      |     |     |   |     |        |         |        |            |
| ATOM | 3619 | O   | GLY | X | 302 | 21.900 | -68.051 | 39.291 | 1.00123.75 |
| O    |      |     |     |   |     |        |         |        |            |
| ATOM | 3620 | N   | SER | X | 303 | 20.838 | -68.302 | 41.273 | 1.00140.87 |
| N    |      |     |     |   |     |        |         |        |            |
| ATOM | 3621 | CA  | SER | X | 303 | 22.056 | -68.337 | 42.034 | 1.00121.37 |
| C    |      |     |     |   |     |        |         |        |            |
| ATOM | 3622 | C   | SER | X | 303 | 22.456 | -69.749 | 42.453 | 1.00 97.07 |
| C    |      |     |     |   |     |        |         |        |            |
| ATOM | 3623 | O   | SER | X | 303 | 21.639 | -70.529 | 42.967 | 1.00 83.83 |
| O    |      |     |     |   |     |        |         |        |            |
| ATOM | 3624 | CB  | SER | X | 303 | 21.954 | -67.462 | 43.274 | 1.00106.76 |
| C    |      |     |     |   |     |        |         |        |            |
| ATOM | 3625 | OG  | SER | X | 303 | 23.175 | -67.487 | 43.986 | 1.00109.71 |
| O    |      |     |     |   |     |        |         |        |            |
| ATOM | 3626 | N   | ALA | X | 304 | 23.753 | -70.028 | 42.309 | 1.00 93.22 |
| N    |      |     |     |   |     |        |         |        |            |
| ATOM | 3627 | CA  | ALA | X | 304 | 24.355 | -71.217 | 42.867 | 1.00 91.70 |
| C    |      |     |     |   |     |        |         |        |            |
| ATOM | 3628 | C   | ALA | X | 304 | 24.096 | -71.280 | 44.359 | 1.00 89.48 |
| C    |      |     |     |   |     |        |         |        |            |
| ATOM | 3629 | O   | ALA | X | 304 | 23.702 | -72.320 | 44.842 | 1.00 77.41 |
| O    |      |     |     |   |     |        |         |        |            |
| ATOM | 3630 | CB  | ALA | X | 304 | 25.847 | -71.216 | 42.592 | 1.00115.44 |
| C    |      |     |     |   |     |        |         |        |            |
| ATOM | 3631 | N   | ILE | X | 305 | 24.294 | -70.165 | 45.074 | 1.00110.09 |
| N    |      |     |     |   |     |        |         |        |            |
| ATOM | 3632 | CA  | ILE | X | 305 | 24.151 | -70.120 | 46.532 | 1.00 92.95 |
| C    |      |     |     |   |     |        |         |        |            |
| ATOM | 3633 | C   | ILE | X | 305 | 22.749 | -70.515 | 46.967 | 1.00 92.20 |
| C    |      |     |     |   |     |        |         |        |            |
| ATOM | 3634 | O   | ILE | X | 305 | 22.584 | -71.368 | 47.830 | 1.00 96.46 |
| O    |      |     |     |   |     |        |         |        |            |
| ATOM | 3635 | CB  | ILE | X | 305 | 24.461 | -68.725 | 47.083 | 1.00 96.83 |
| C    |      |     |     |   |     |        |         |        |            |

|      |      |     |     |   |     |        |         |        |            |
|------|------|-----|-----|---|-----|--------|---------|--------|------------|
| ATOM | 3636 | CG1 | ILE | X | 305 | 25.753 | -68.131 | 46.465 | 1.00106.50 |
| C    |      |     |     |   |     |        |         |        |            |
| ATOM | 3637 | CG2 | ILE | X | 305 | 24.554 | -68.797 | 48.588 | 1.00107.62 |
| C    |      |     |     |   |     |        |         |        |            |
| ATOM | 3638 | CD1 | ILE | X | 305 | 27.043 | -68.548 | 47.145 | 1.00102.27 |
| C    |      |     |     |   |     |        |         |        |            |
| ATOM | 3639 | N   | GLN | X | 306 | 21.744 | -69.882 | 46.358 | 1.00 92.36 |
| N    |      |     |     |   |     |        |         |        |            |
| ATOM | 3640 | CA  | GLN | X | 306 | 20.330 | -70.177 | 46.631 | 1.00 86.12 |
| C    |      |     |     |   |     |        |         |        |            |
| ATOM | 3641 | C   | GLN | X | 306 | 19.955 | -71.596 | 46.211 | 1.00 86.99 |
| C    |      |     |     |   |     |        |         |        |            |
| ATOM | 3642 | O   | GLN | X | 306 | 19.011 | -72.194 | 46.752 | 1.00 84.35 |
| O    |      |     |     |   |     |        |         |        |            |
| ATOM | 3643 | CB  | GLN | X | 306 | 19.420 | -69.309 | 45.761 | 1.00 77.57 |
| C    |      |     |     |   |     |        |         |        |            |
| ATOM | 3644 | CG  | GLN | X | 306 | 19.449 | -67.823 | 45.967 | 1.00 84.64 |
| C    |      |     |     |   |     |        |         |        |            |
| ATOM | 3645 | CD  | GLN | X | 306 | 18.546 | -67.122 | 44.965 | 1.00115.24 |
| C    |      |     |     |   |     |        |         |        |            |
| ATOM | 3646 | OE1 | GLN | X | 306 | 18.715 | -67.263 | 43.742 | 1.00140.72 |
| O    |      |     |     |   |     |        |         |        |            |
| ATOM | 3647 | NE2 | GLN | X | 306 | 17.525 | -66.433 | 45.471 | 1.00146.97 |
| N    |      |     |     |   |     |        |         |        |            |
| ATOM | 3648 | N   | ARG | X | 307 | 20.666 | -72.105 | 45.199 | 1.00103.69 |
| N    |      |     |     |   |     |        |         |        |            |
| ATOM | 3649 | CA  | ARG | X | 307 | 20.462 | -73.473 | 44.762 | 1.00 98.66 |
| C    |      |     |     |   |     |        |         |        |            |
| ATOM | 3650 | C   | ARG | X | 307 | 20.976 | -74.452 | 45.815 | 1.00 75.41 |
| C    |      |     |     |   |     |        |         |        |            |
| ATOM | 3651 | O   | ARG | X | 307 | 20.244 | -75.318 | 46.261 | 1.00 90.42 |
| O    |      |     |     |   |     |        |         |        |            |
| ATOM | 3652 | CB  | ARG | X | 307 | 21.068 | -73.755 | 43.377 | 1.00105.89 |
| C    |      |     |     |   |     |        |         |        |            |
| ATOM | 3653 | CG  | ARG | X | 307 | 20.130 | -74.593 | 42.510 | 1.00101.47 |
| C    |      |     |     |   |     |        |         |        |            |
| ATOM | 3654 | CD  | ARG | X | 307 | 20.734 | -74.980 | 41.188 | 1.00 86.72 |
| C    |      |     |     |   |     |        |         |        |            |
| ATOM | 3655 | NE  | ARG | X | 307 | 20.490 | -73.946 | 40.193 | 1.00 92.91 |
| N    |      |     |     |   |     |        |         |        |            |
| ATOM | 3656 | CZ  | ARG | X | 307 | 21.406 | -73.088 | 39.757 | 1.00 98.99 |
| C    |      |     |     |   |     |        |         |        |            |
| ATOM | 3657 | NH1 | ARG | X | 307 | 22.659 | -73.144 | 40.200 | 1.00 96.20 |
| N    |      |     |     |   |     |        |         |        |            |
| ATOM | 3658 | NH2 | ARG | X | 307 | 21.069 | -72.174 | 38.857 | 1.00104.66 |
| N1+  |      |     |     |   |     |        |         |        |            |
| ATOM | 3659 | N   | LEU | X | 308 | 22.220 | -74.280 | 46.236 | 1.00 64.23 |
| N    |      |     |     |   |     |        |         |        |            |
| ATOM | 3660 | CA  | LEU | X | 308 | 22.836 | -75.100 | 47.288 | 1.00 65.48 |
| C    |      |     |     |   |     |        |         |        |            |
| ATOM | 3661 | C   | LEU | X | 308 | 22.064 | -75.048 | 48.596 | 1.00 86.50 |
| C    |      |     |     |   |     |        |         |        |            |
| ATOM | 3662 | O   | LEU | X | 308 | 21.847 | -76.081 | 49.211 | 1.00100.27 |
| O    |      |     |     |   |     |        |         |        |            |

|      |      |     |     |   |     |        |         |        |      |        |
|------|------|-----|-----|---|-----|--------|---------|--------|------|--------|
| ATOM | 3663 | CB  | LEU | X | 308 | 24.245 | -74.598 | 47.528 | 1.00 | 60.96  |
| C    |      |     |     |   |     |        |         |        |      |        |
| ATOM | 3664 | CG  | LEU | X | 308 | 25.272 | -74.798 | 46.429 | 1.00 | 53.98  |
| C    |      |     |     |   |     |        |         |        |      |        |
| ATOM | 3665 | CD1 | LEU | X | 308 | 26.283 | -73.654 | 46.331 | 1.00 | 52.36  |
| C    |      |     |     |   |     |        |         |        |      |        |
| ATOM | 3666 | CD2 | LEU | X | 308 | 25.980 | -76.102 | 46.705 | 1.00 | 60.89  |
| C    |      |     |     |   |     |        |         |        |      |        |
| ATOM | 3667 | N   | ARG | X | 309 | 21.679 | -73.845 | 49.030 | 1.00 | 98.96  |
| N    |      |     |     |   |     |        |         |        |      |        |
| ATOM | 3668 | CA  | ARG | X | 309 | 20.891 | -73.661 | 50.249 | 1.00 | 95.01  |
| C    |      |     |     |   |     |        |         |        |      |        |
| ATOM | 3669 | C   | ARG | X | 309 | 19.584 | -74.449 | 50.173 | 1.00 | 89.40  |
| C    |      |     |     |   |     |        |         |        |      |        |
| ATOM | 3670 | O   | ARG | X | 309 | 19.368 | -75.395 | 50.934 | 1.00 | 79.85  |
| O    |      |     |     |   |     |        |         |        |      |        |
| ATOM | 3671 | CB  | ARG | X | 309 | 20.616 | -72.159 | 50.518 | 1.00 | 87.35  |
| C    |      |     |     |   |     |        |         |        |      |        |
| ATOM | 3672 | CG  | ARG | X | 309 | 21.437 | -71.577 | 51.677 | 1.00 | 89.23  |
| C    |      |     |     |   |     |        |         |        |      |        |
| ATOM | 3673 | CD  | ARG | X | 309 | 21.362 | -70.054 | 51.790 | 1.00 | 87.13  |
| C    |      |     |     |   |     |        |         |        |      |        |
| ATOM | 3674 | NE  | ARG | X | 309 | 19.986 | -69.545 | 51.792 | 1.00 | 96.18  |
| N    |      |     |     |   |     |        |         |        |      |        |
| ATOM | 3675 | CZ  | ARG | X | 309 | 19.192 | -69.476 | 52.863 | 1.00 | 101.88 |
| C    |      |     |     |   |     |        |         |        |      |        |
| ATOM | 3676 | NH1 | ARG | X | 309 | 17.962 | -68.975 | 52.749 | 1.00 | 97.29  |
| N    |      |     |     |   |     |        |         |        |      |        |
| ATOM | 3677 | NH2 | ARG | X | 309 | 19.615 | -69.921 | 54.038 | 1.00 | 104.73 |
| N1+  |      |     |     |   |     |        |         |        |      |        |
| ATOM | 3678 | N   | CYX | X | 310 | 18.727 | -74.064 | 49.240 | 1.00 | 99.87  |
| N    |      |     |     |   |     |        |         |        |      |        |
| ATOM | 3679 | CA  | CYX | X | 310 | 17.468 | -74.754 | 49.039 | 1.00 | 109.57 |
| C    |      |     |     |   |     |        |         |        |      |        |
| ATOM | 3680 | C   | CYX | X | 310 | 17.639 | -76.280 | 48.945 | 1.00 | 89.82  |
| C    |      |     |     |   |     |        |         |        |      |        |
| ATOM | 3681 | O   | CYX | X | 310 | 16.818 | -77.043 | 49.466 | 1.00 | 109.00 |
| O    |      |     |     |   |     |        |         |        |      |        |
| ATOM | 3682 | CB  | CYX | X | 310 | 16.781 | -74.204 | 47.791 | 1.00 | 116.91 |
| C    |      |     |     |   |     |        |         |        |      |        |
| ATOM | 3683 | SG  | CYX | X | 310 | 16.019 | -75.453 | 46.771 | 1.00 | 138.64 |
| S    |      |     |     |   |     |        |         |        |      |        |
| ATOM | 3684 | N   | GLU | X | 311 | 18.708 | -76.706 | 48.288 | 1.00 | 77.35  |
| N    |      |     |     |   |     |        |         |        |      |        |
| ATOM | 3685 | CA  | GLU | X | 311 | 19.086 | -78.125 | 48.202 | 1.00 | 89.61  |
| C    |      |     |     |   |     |        |         |        |      |        |
| ATOM | 3686 | C   | GLU | X | 311 | 19.421 | -78.793 | 49.537 | 1.00 | 101.35 |
| C    |      |     |     |   |     |        |         |        |      |        |
| ATOM | 3687 | O   | GLU | X | 311 | 19.129 | -79.954 | 49.735 | 1.00 | 84.60  |
| O    |      |     |     |   |     |        |         |        |      |        |
| ATOM | 3688 | CB  | GLU | X | 311 | 20.368 | -78.256 | 47.357 | 1.00 | 104.80 |
| C    |      |     |     |   |     |        |         |        |      |        |
| ATOM | 3689 | CG  | GLU | X | 311 | 20.166 | -78.784 | 45.948 | 1.00 | 119.93 |
| C    |      |     |     |   |     |        |         |        |      |        |

|             |      |     |     |   |     |        |         |        |            |
|-------------|------|-----|-----|---|-----|--------|---------|--------|------------|
| ATOM<br>C   | 3690 | CD  | GLU | X | 311 | 21.172 | -78.224 | 44.945 | 1.00116.27 |
| ATOM<br>O   | 3691 | OE1 | GLU | X | 311 | 20.824 | -78.114 | 43.751 | 1.00111.94 |
| ATOM<br>O1- | 3692 | OE2 | GLU | X | 311 | 22.312 | -77.913 | 45.340 | 1.00115.89 |
| ATOM<br>N   | 3693 | N   | LEU | X | 312 | 20.094 | -78.073 | 50.424 | 1.00116.32 |
| ATOM<br>C   | 3694 | CA  | LEU | X | 312 | 20.346 | -78.599 | 51.764 | 1.00 86.56 |
| ATOM<br>C   | 3695 | C   | LEU | X | 312 | 19.062 | -78.753 | 52.525 | 1.00 76.86 |
| ATOM<br>O   | 3696 | O   | LEU | X | 312 | 18.904 | -79.707 | 53.279 | 1.00 83.54 |
| ATOM<br>C   | 3697 | CB  | LEU | X | 312 | 21.298 | -77.720 | 52.524 | 1.00 76.99 |
| ATOM<br>C   | 3698 | CG  | LEU | X | 312 | 22.719 | -78.190 | 52.340 | 1.00 73.19 |
| ATOM<br>C   | 3699 | CD1 | LEU | X | 312 | 23.671 | -77.027 | 52.565 | 1.00 72.88 |
| ATOM<br>C   | 3700 | CD2 | LEU | X | 312 | 23.012 | -79.356 | 53.273 | 1.00 76.20 |
| ATOM<br>N   | 3701 | N   | ASP | X | 313 | 18.137 | -77.814 | 52.320 | 1.00 79.27 |
| ATOM<br>C   | 3702 | CA  | ASP | X | 313 | 16.840 | -77.870 | 52.980 | 1.00 88.42 |
| ATOM<br>C   | 3703 | C   | ASP | X | 313 | 16.138 | -79.194 | 52.687 | 1.00 89.00 |
| ATOM<br>O   | 3704 | O   | ASP | X | 313 | 15.777 | -79.931 | 53.604 | 1.00 94.08 |
| ATOM<br>C   | 3705 | CB  | ASP | X | 313 | 15.925 | -76.688 | 52.605 | 1.00105.42 |
| ATOM<br>C   | 3706 | CG  | ASP | X | 313 | 14.406 | -77.054 | 52.661 | 1.00130.12 |
| ATOM<br>O   | 3707 | OD1 | ASP | X | 313 | 13.993 | -77.951 | 53.450 | 1.00108.92 |
| ATOM<br>O1- | 3708 | OD2 | ASP | X | 313 | 13.627 | -76.437 | 51.900 | 1.00141.53 |
| ATOM<br>N   | 3709 | N   | ILE | X | 314 | 15.970 | -79.498 | 51.408 | 1.00109.96 |
| ATOM<br>C   | 3710 | CA  | ILE | X | 314 | 15.312 | -80.720 | 50.970 | 1.00 97.34 |
| ATOM<br>C   | 3711 | C   | ILE | X | 314 | 15.954 | -81.976 | 51.565 | 1.00 86.02 |
| ATOM<br>O   | 3712 | O   | ILE | X | 314 | 15.250 | -82.879 | 52.011 | 1.00 89.23 |
| ATOM<br>C   | 3713 | CB  | ILE | X | 314 | 15.316 | -80.751 | 49.439 | 1.00 91.15 |
| ATOM<br>C   | 3714 | CG1 | ILE | X | 314 | 14.309 | -79.731 | 48.913 | 1.00102.07 |
| ATOM<br>C   | 3715 | CG2 | ILE | X | 314 | 14.973 | -82.116 | 48.926 | 1.00 96.79 |
| ATOM<br>C   | 3716 | CD1 | ILE | X | 314 | 14.909 | -78.717 | 47.971 | 1.00118.46 |

|      |      |     |     |   |     |        |         |        |      |        |
|------|------|-----|-----|---|-----|--------|---------|--------|------|--------|
| ATOM | 3717 | N   | MET | X | 315 | 17.288 | -82.011 | 51.591 | 1.00 | 74.78  |
| N    |      |     |     |   |     |        |         |        |      |        |
| ATOM | 3718 | CA  | MET | X | 315 | 18.035 | -83.175 | 52.093 | 1.00 | 79.68  |
| C    |      |     |     |   |     |        |         |        |      |        |
| ATOM | 3719 | C   | MET | X | 315 | 17.812 | -83.437 | 53.583 | 1.00 | 85.45  |
| C    |      |     |     |   |     |        |         |        |      |        |
| ATOM | 3720 | O   | MET | X | 315 | 17.816 | -84.577 | 54.019 | 1.00 | 85.47  |
| O    |      |     |     |   |     |        |         |        |      |        |
| ATOM | 3721 | CB  | MET | X | 315 | 19.529 | -82.961 | 51.913 | 1.00 | 81.27  |
| C    |      |     |     |   |     |        |         |        |      |        |
| ATOM | 3722 | CG  | MET | X | 315 | 20.054 | -83.184 | 50.535 | 1.00 | 81.51  |
| C    |      |     |     |   |     |        |         |        |      |        |
| ATOM | 3723 | SD  | MET | X | 315 | 21.829 | -82.906 | 50.534 | 1.00 | 119.46 |
| S    |      |     |     |   |     |        |         |        |      |        |
| ATOM | 3724 | CE  | MET | X | 315 | 22.027 | -82.150 | 48.925 | 1.00 | 133.30 |
| C    |      |     |     |   |     |        |         |        |      |        |
| ATOM | 3725 | N   | ASN | X | 316 | 17.647 | -82.374 | 54.358 | 1.00 | 95.10  |
| N    |      |     |     |   |     |        |         |        |      |        |
| ATOM | 3726 | CA  | ASN | X | 316 | 17.265 | -82.513 | 55.752 | 1.00 | 83.77  |
| C    |      |     |     |   |     |        |         |        |      |        |
| ATOM | 3727 | C   | ASN | X | 316 | 15.770 | -82.755 | 55.911 | 1.00 | 78.79  |
| C    |      |     |     |   |     |        |         |        |      |        |
| ATOM | 3728 | O   | ASN | X | 316 | 15.370 | -83.687 | 56.599 | 1.00 | 99.45  |
| O    |      |     |     |   |     |        |         |        |      |        |
| ATOM | 3729 | CB  | ASN | X | 316 | 17.780 | -81.315 | 56.548 | 1.00 | 93.28  |
| C    |      |     |     |   |     |        |         |        |      |        |
| ATOM | 3730 | CG  | ASN | X | 316 | 19.315 | -81.261 | 56.581 | 1.00 | 105.84 |
| C    |      |     |     |   |     |        |         |        |      |        |
| ATOM | 3731 | OD1 | ASN | X | 316 | 19.977 | -81.226 | 55.539 | 1.00 | 85.55  |
| O    |      |     |     |   |     |        |         |        |      |        |
| ATOM | 3732 | ND2 | ASN | X | 316 | 19.882 | -81.322 | 57.779 | 1.00 | 136.56 |
| N    |      |     |     |   |     |        |         |        |      |        |
| ATOM | 3733 | N   | LYS | X | 317 | 14.950 | -81.955 | 55.228 | 1.00 | 83.25  |
| N    |      |     |     |   |     |        |         |        |      |        |
| ATOM | 3734 | CA  | LYS | X | 317 | 13.492 | -81.937 | 55.431 | 1.00 | 89.29  |
| C    |      |     |     |   |     |        |         |        |      |        |
| ATOM | 3735 | C   | LYS | X | 317 | 12.728 | -83.124 | 54.804 | 1.00 | 106.60 |
| C    |      |     |     |   |     |        |         |        |      |        |
| ATOM | 3736 | O   | LYS | X | 317 | 11.593 | -83.424 | 55.195 | 1.00 | 106.39 |
| O    |      |     |     |   |     |        |         |        |      |        |
| ATOM | 3737 | CB  | LYS | X | 317 | 12.902 | -80.623 | 54.837 | 1.00 | 0.00   |
| C    |      |     |     |   |     |        |         |        |      |        |
| ATOM | 3738 | CG  | LYS | X | 317 | 11.418 | -80.402 | 55.166 | 1.00 | 0.00   |
| C    |      |     |     |   |     |        |         |        |      |        |
| ATOM | 3739 | CD  | LYS | X | 317 | 10.934 | -79.040 | 54.649 | 1.00 | 0.00   |
| C    |      |     |     |   |     |        |         |        |      |        |
| ATOM | 3740 | CE  | LYS | X | 317 | 9.455  | -78.830 | 54.981 | 1.00 | 0.00   |
| C    |      |     |     |   |     |        |         |        |      |        |
| ATOM | 3741 | NZ  | LYS | X | 317 | 8.976  | -77.527 | 54.493 | 1.00 | 0.00   |
| N1+  |      |     |     |   |     |        |         |        |      |        |
| ATOM | 3742 | N   | CYS | X | 318 | 13.345 | -83.849 | 53.863 | 1.00 | 128.17 |
| N    |      |     |     |   |     |        |         |        |      |        |
| ATOM | 3743 | CA  | CYS | X | 318 | 12.671 | -84.944 | 53.159 | 1.00 | 130.40 |
| C    |      |     |     |   |     |        |         |        |      |        |

|      |      |     |     |   |     |        |         |        |            |
|------|------|-----|-----|---|-----|--------|---------|--------|------------|
| ATOM | 3744 | C   | CYS | X | 318 | 13.299 | -86.335 | 53.439 | 1.00127.68 |
| C    |      |     |     |   |     |        |         |        |            |
| ATOM | 3745 | O   | CYS | X | 318 | 13.923 | -86.962 | 52.556 | 1.00163.20 |
| O    |      |     |     |   |     |        |         |        |            |
| ATOM | 3746 | CB  | CYS | X | 318 | 12.738 | -84.710 | 51.629 | 1.00116.39 |
| C    |      |     |     |   |     |        |         |        |            |
| ATOM | 3747 | SG  | CYS | X | 318 | 11.279 | -83.972 | 50.860 | 1.00119.94 |
| S    |      |     |     |   |     |        |         |        |            |
| ATOM | 3748 | N   | THR | X | 319 | 12.943 | -86.888 | 54.587 | 1.00163.41 |
| N    |      |     |     |   |     |        |         |        |            |
| ATOM | 3749 | CA  | THR | X | 319 | 13.410 | -88.217 | 54.982 | 1.00153.04 |
| C    |      |     |     |   |     |        |         |        |            |
| ATOM | 3750 | C   | THR | X | 319 | 12.695 | -89.390 | 54.271 | 1.00159.17 |
| C    |      |     |     |   |     |        |         |        |            |
| ATOM | 3751 | O   | THR | X | 319 | 13.332 | -90.423 | 54.023 | 1.00157.33 |
| O    |      |     |     |   |     |        |         |        |            |
| ATOM | 3752 | CB  | THR | X | 319 | 13.262 | -88.378 | 56.480 | 1.00155.25 |
| C    |      |     |     |   |     |        |         |        |            |
| ATOM | 3753 | OG1 | THR | X | 319 | 12.093 | -87.670 | 56.898 | 1.00163.99 |
| O    |      |     |     |   |     |        |         |        |            |
| ATOM | 3754 | CG2 | THR | X | 319 | 14.471 | -87.816 | 57.200 | 1.00161.55 |
| C    |      |     |     |   |     |        |         |        |            |
| ATOM | 3755 | N   | SER | X | 320 | 11.410 | -89.264 | 53.982 | 1.00157.78 |
| N    |      |     |     |   |     |        |         |        |            |
| ATOM | 3756 | CA  | SER | X | 320 | 10.603 | -90.409 | 53.487 | 1.00147.74 |
| C    |      |     |     |   |     |        |         |        |            |
| ATOM | 3757 | C   | SER | X | 320 | 10.226 | -90.300 | 52.025 | 1.00152.24 |
| C    |      |     |     |   |     |        |         |        |            |
| ATOM | 3758 | O   | SER | X | 320 | 10.054 | -89.210 | 51.527 | 1.00170.53 |
| O    |      |     |     |   |     |        |         |        |            |
| ATOM | 3759 | CB  | SER | X | 320 | 9.265  | -90.448 | 54.209 | 1.00144.77 |
| C    |      |     |     |   |     |        |         |        |            |
| ATOM | 3760 | OG  | SER | X | 320 | 8.218  | -90.047 | 53.321 | 1.00132.77 |
| O    |      |     |     |   |     |        |         |        |            |
| ATOM | 3761 | N   | LEU | X | 321 | 9.993  | -91.449 | 51.389 | 1.00150.66 |
| N    |      |     |     |   |     |        |         |        |            |
| ATOM | 3762 | CA  | LEU | X | 321 | 9.631  | -91.536 | 49.954 | 1.00135.01 |
| C    |      |     |     |   |     |        |         |        |            |
| ATOM | 3763 | C   | LEU | X | 321 | 8.439  | -92.473 | 49.790 | 1.00120.06 |
| C    |      |     |     |   |     |        |         |        |            |
| ATOM | 3764 | O   | LEU | X | 321 | 8.489  | -93.642 | 50.134 | 1.00121.96 |
| O    |      |     |     |   |     |        |         |        |            |
| ATOM | 3765 | CB  | LEU | X | 321 | 10.777 | -92.118 | 49.122 | 1.00126.63 |
| C    |      |     |     |   |     |        |         |        |            |
| ATOM | 3766 | CG  | LEU | X | 321 | 12.000 | -91.239 | 48.920 | 1.00122.84 |
| C    |      |     |     |   |     |        |         |        |            |
| ATOM | 3767 | CD1 | LEU | X | 321 | 13.256 | -92.069 | 48.679 | 1.00113.66 |
| C    |      |     |     |   |     |        |         |        |            |
| ATOM | 3768 | CD2 | LEU | X | 321 | 11.724 | -90.274 | 47.770 | 1.00126.50 |
| C    |      |     |     |   |     |        |         |        |            |
| ATOM | 3769 | N   | CYS | X | 322 | 7.384  | -91.945 | 49.233 | 1.00108.37 |
| N    |      |     |     |   |     |        |         |        |            |
| ATOM | 3770 | CA  | CYS | X | 322 | 6.059  | -92.593 | 49.293 | 1.00107.67 |
| C    |      |     |     |   |     |        |         |        |            |

|      |      |     |     |   |     |        |         |        |            |
|------|------|-----|-----|---|-----|--------|---------|--------|------------|
| ATOM | 3771 | C   | CYS | X | 322 | 5.565  | -92.898 | 47.886 | 1.00103.63 |
| C    |      |     |     |   |     |        |         |        |            |
| ATOM | 3772 | O   | CYS | X | 322 | 6.086  | -92.379 | 46.890 | 1.00113.26 |
| O    |      |     |     |   |     |        |         |        |            |
| ATOM | 3773 | CB  | CYS | X | 322 | 5.110  | -91.681 | 50.100 | 1.00115.58 |
| C    |      |     |     |   |     |        |         |        |            |
| ATOM | 3774 | SG  | CYS | X | 322 | 5.906  | -90.763 | 51.547 | 1.00119.28 |
| S    |      |     |     |   |     |        |         |        |            |
| ATOM | 3775 | N   | CYM | X | 323 | 4.604  | -93.804 | 47.798 | 1.00101.28 |
| N    |      |     |     |   |     |        |         |        |            |
| ATOM | 3776 | CA  | CYM | X | 323 | 3.884  | -94.116 | 46.570 | 1.00107.56 |
| C    |      |     |     |   |     |        |         |        |            |
| ATOM | 3777 | C   | CYM | X | 323 | 3.182  | -92.850 | 46.093 | 1.00118.03 |
| C    |      |     |     |   |     |        |         |        |            |
| ATOM | 3778 | O   | CYM | X | 323 | 2.415  | -92.283 | 46.854 | 1.00121.04 |
| O    |      |     |     |   |     |        |         |        |            |
| ATOM | 3779 | CB  | CYM | X | 323 | 2.852  | -95.197 | 46.951 | 1.00104.71 |
| C    |      |     |     |   |     |        |         |        |            |
| ATOM | 3780 | SG  | CYM | X | 323 | 1.663  | -95.728 | 45.708 | 1.00 95.21 |
| S1-  |      |     |     |   |     |        |         |        |            |
| ATOM | 3781 | N   | LYS | X | 324 | 3.500  | -92.355 | 44.890 | 1.00119.98 |
| N    |      |     |     |   |     |        |         |        |            |
| ATOM | 3782 | CA  | LYS | X | 324 | 3.014  | -91.044 | 44.512 | 1.00121.78 |
| C    |      |     |     |   |     |        |         |        |            |
| ATOM | 3783 | C   | LYS | X | 324 | 1.496  | -91.093 | 44.298 | 1.00127.66 |
| C    |      |     |     |   |     |        |         |        |            |
| ATOM | 3784 | O   | LYS | X | 324 | 0.782  | -90.140 | 44.641 | 1.00141.82 |
| O    |      |     |     |   |     |        |         |        |            |
| ATOM | 3785 | CB  | LYS | X | 324 | 3.729  | -90.508 | 43.285 | 1.00122.97 |
| C    |      |     |     |   |     |        |         |        |            |
| ATOM | 3786 | CG  | LYS | X | 324 | 2.948  | -89.407 | 42.566 | 1.00131.22 |
| C    |      |     |     |   |     |        |         |        |            |
| ATOM | 3787 | CD  | LYS | X | 324 | 3.683  | -88.850 | 41.359 | 1.00134.41 |
| C    |      |     |     |   |     |        |         |        |            |
| ATOM | 3788 | CE  | LYS | X | 324 | 3.879  | -87.338 | 41.491 | 1.00145.83 |
| C    |      |     |     |   |     |        |         |        |            |
| ATOM | 3789 | NZ  | LYS | X | 324 | 4.833  | -86.931 | 42.580 | 1.00148.07 |
| N1+  |      |     |     |   |     |        |         |        |            |
| ATOM | 3790 | N   | GLN | X | 325 | 1.020  | -92.223 | 43.765 | 1.00121.19 |
| N    |      |     |     |   |     |        |         |        |            |
| ATOM | 3791 | CA  | GLN | X | 325 | -0.373 | -92.422 | 43.404 | 1.00119.65 |
| C    |      |     |     |   |     |        |         |        |            |
| ATOM | 3792 | C   | GLN | X | 325 | -1.314 | -92.449 | 44.641 | 1.00128.57 |
| C    |      |     |     |   |     |        |         |        |            |
| ATOM | 3793 | O   | GLN | X | 325 | -2.214 | -91.614 | 44.745 | 1.00141.95 |
| O    |      |     |     |   |     |        |         |        |            |
| ATOM | 3794 | CB  | GLN | X | 325 | -0.459 | -93.717 | 42.589 | 1.00115.76 |
| C    |      |     |     |   |     |        |         |        |            |
| ATOM | 3795 | CG  | GLN | X | 325 | -1.696 | -94.544 | 42.815 | 1.00118.88 |
| C    |      |     |     |   |     |        |         |        |            |
| ATOM | 3796 | CD  | GLN | X | 325 | -2.935 | -93.757 | 42.532 | 1.00118.05 |
| C    |      |     |     |   |     |        |         |        |            |
| ATOM | 3797 | OE1 | GLN | X | 325 | -3.822 | -93.630 | 43.390 | 1.00122.72 |
| O    |      |     |     |   |     |        |         |        |            |



|      |      |     |     |   |     |        |         |        |            |
|------|------|-----|-----|---|-----|--------|---------|--------|------------|
| ATOM | 3798 | NE2 | GLN | X | 325 | -3.024 | -93.229 | 41.322 | 1.00117.93 |
| N    |      |     |     |   |     |        |         |        |            |
| ATOM | 3799 | N   | CYM | X | 326 | -1.113 | -93.393 | 45.563 | 1.00128.49 |
| N    |      |     |     |   |     |        |         |        |            |
| ATOM | 3800 | CA  | CYM | X | 326 | -1.990 | -93.515 | 46.722 | 1.00132.28 |
| C    |      |     |     |   |     |        |         |        |            |
| ATOM | 3801 | C   | CYM | X | 326 | -1.448 | -92.692 | 47.905 | 1.00126.42 |
| C    |      |     |     |   |     |        |         |        |            |
| ATOM | 3802 | O   | CYM | X | 326 | -2.018 | -92.678 | 49.007 | 1.00122.55 |
| O    |      |     |     |   |     |        |         |        |            |
| ATOM | 3803 | CB  | CYM | X | 326 | -2.150 | -94.981 | 47.076 | 1.00144.55 |
| C    |      |     |     |   |     |        |         |        |            |
| ATOM | 3804 | SG  | CYM | X | 326 | -0.635 | -95.697 | 47.760 | 1.00183.10 |
| S1-  |      |     |     |   |     |        |         |        |            |
| ATOM | 3805 | N   | GLN | X | 327 | -0.324 | -92.037 | 47.647 | 1.00124.50 |
| N    |      |     |     |   |     |        |         |        |            |
| ATOM | 3806 | CA  | GLN | X | 327 | 0.187  | -90.919 | 48.456 | 1.00130.08 |
| C    |      |     |     |   |     |        |         |        |            |
| ATOM | 3807 | C   | GLN | X | 327 | 0.701  | -91.262 | 49.858 | 1.00130.88 |
| C    |      |     |     |   |     |        |         |        |            |
| ATOM | 3808 | O   | GLN | X | 327 | 1.881  | -91.058 | 50.176 | 1.00125.79 |
| O    |      |     |     |   |     |        |         |        |            |
| ATOM | 3809 | CB  | GLN | X | 327 | -0.883 | -89.829 | 48.546 | 1.00129.94 |
| C    |      |     |     |   |     |        |         |        |            |
| ATOM | 3810 | CG  | GLN | X | 327 | -0.336 | -88.415 | 48.397 | 1.00135.56 |
| C    |      |     |     |   |     |        |         |        |            |
| ATOM | 3811 | CD  | GLN | X | 327 | -1.376 | -87.439 | 47.861 | 1.00133.34 |
| C    |      |     |     |   |     |        |         |        |            |
| ATOM | 3812 | NE2 | GLN | X | 327 | -2.141 | -87.782 | 46.961 | 1.00135.31 |
| N    |      |     |     |   |     |        |         |        |            |
| ATOM | 3813 | OE1 | GLN | X | 327 | -1.432 | -86.228 | 48.439 | 1.00129.89 |
| O    |      |     |     |   |     |        |         |        |            |
| ATOM | 3814 | N   | GLU | X | 328 | -0.179 | -91.787 | 50.702 | 1.00140.15 |
| N    |      |     |     |   |     |        |         |        |            |
| ATOM | 3815 | CA  | GLU | X | 328 | 0.174  | -91.996 | 52.135 | 1.00144.93 |
| C    |      |     |     |   |     |        |         |        |            |
| ATOM | 3816 | C   | GLU | X | 328 | 0.714  | -93.413 | 52.408 | 1.00130.66 |
| C    |      |     |     |   |     |        |         |        |            |
| ATOM | 3817 | O   | GLU | X | 328 | 0.496  | -93.991 | 53.473 | 1.00144.46 |
| O    |      |     |     |   |     |        |         |        |            |
| ATOM | 3818 | CB  | GLU | X | 328 | -0.994 | -91.621 | 53.100 | 1.00153.80 |
| C    |      |     |     |   |     |        |         |        |            |
| ATOM | 3819 | CG  | GLU | X | 328 | -1.250 | -90.104 | 53.285 | 1.00157.86 |
| C    |      |     |     |   |     |        |         |        |            |
| ATOM | 3820 | CD  | GLU | X | 328 | -0.557 | -89.477 | 54.504 | 1.00157.46 |
| C    |      |     |     |   |     |        |         |        |            |
| ATOM | 3821 | OE1 | GLU | X | 328 | -0.805 | -88.275 | 54.797 | 1.00153.90 |
| O    |      |     |     |   |     |        |         |        |            |
| ATOM | 3822 | OE2 | GLU | X | 328 | 0.225  | -90.179 | 55.172 | 1.00154.79 |
| O1-  |      |     |     |   |     |        |         |        |            |
| ATOM | 3823 | N   | THR | X | 329 | 1.500  | -93.947 | 51.484 | 1.00114.20 |
| N    |      |     |     |   |     |        |         |        |            |
| ATOM | 3824 | CA  | THR | X | 329 | 2.241  | -95.210 | 51.671 | 1.00108.54 |
| C    |      |     |     |   |     |        |         |        |            |

|      |      |     |     |   |     |        |         |        |            |
|------|------|-----|-----|---|-----|--------|---------|--------|------------|
| ATOM | 3825 | C   | THR | X | 329 | 3.785  | -94.978 | 51.570 | 1.00111.61 |
| C    |      |     |     |   |     |        |         |        |            |
| ATOM | 3826 | O   | THR | X | 329 | 4.278  | -94.663 | 50.516 | 1.00113.57 |
| O    |      |     |     |   |     |        |         |        |            |
| ATOM | 3827 | CB  | THR | X | 329 | 1.846  | -96.269 | 50.542 | 1.00103.02 |
| C    |      |     |     |   |     |        |         |        |            |
| ATOM | 3828 | OG1 | THR | X | 329 | 0.444  | -96.598 | 50.580 | 1.00 94.96 |
| O    |      |     |     |   |     |        |         |        |            |
| ATOM | 3829 | CG2 | THR | X | 329 | 2.679  | -97.571 | 50.649 | 1.00 99.92 |
| C    |      |     |     |   |     |        |         |        |            |
| ATOM | 3830 | N   | GLU | X | 330 | 4.515  | -95.368 | 52.623 | 1.00116.73 |
| N    |      |     |     |   |     |        |         |        |            |
| ATOM | 3831 | CA  | GLU | X | 330 | 5.991  | -95.322 | 52.609 | 1.00118.88 |
| C    |      |     |     |   |     |        |         |        |            |
| ATOM | 3832 | C   | GLU | X | 330 | 6.618  | -96.496 | 51.802 | 1.00105.96 |
| C    |      |     |     |   |     |        |         |        |            |
| ATOM | 3833 | O   | GLU | X | 330 | 6.343  | -97.711 | 51.998 | 1.00101.85 |
| O    |      |     |     |   |     |        |         |        |            |
| ATOM | 3834 | CB  | GLU | X | 330 | 6.656  | -95.157 | 54.019 | 1.00132.80 |
| C    |      |     |     |   |     |        |         |        |            |
| ATOM | 3835 | CG  | GLU | X | 330 | 8.207  | -95.295 | 53.995 | 1.00140.20 |
| C    |      |     |     |   |     |        |         |        |            |
| ATOM | 3836 | CD  | GLU | X | 330 | 8.971  | -94.536 | 55.105 | 1.00143.06 |
| C    |      |     |     |   |     |        |         |        |            |
| ATOM | 3837 | OE1 | GLU | X | 330 | 10.180 | -94.295 | 54.915 | 1.00133.01 |
| O    |      |     |     |   |     |        |         |        |            |
| ATOM | 3838 | OE2 | GLU | X | 330 | 8.399  | -94.226 | 56.179 | 1.00152.33 |
| O1-  |      |     |     |   |     |        |         |        |            |
| ATOM | 3839 | N   | ILE | X | 331 | 7.469  | -96.128 | 50.881 | 1.00 98.13 |
| N    |      |     |     |   |     |        |         |        |            |
| ATOM | 3840 | CA  | ILE | X | 331 | 8.237  | -97.136 | 50.130 | 1.00101.52 |
| C    |      |     |     |   |     |        |         |        |            |
| ATOM | 3841 | C   | ILE | X | 331 | 9.620  | -97.313 | 50.766 | 1.00 93.27 |
| C    |      |     |     |   |     |        |         |        |            |
| ATOM | 3842 | O   | ILE | X | 331 | 10.061 | -98.438 | 51.035 | 1.00 89.65 |
| O    |      |     |     |   |     |        |         |        |            |
| ATOM | 3843 | CB  | ILE | X | 331 | 8.319  | -96.724 | 48.644 | 1.00114.80 |
| C    |      |     |     |   |     |        |         |        |            |
| ATOM | 3844 | CG1 | ILE | X | 331 | 6.889  | -96.654 | 48.007 | 1.00123.94 |
| C    |      |     |     |   |     |        |         |        |            |
| ATOM | 3845 | CG2 | ILE | X | 331 | 9.237  | -97.650 | 47.839 | 1.00118.54 |
| C    |      |     |     |   |     |        |         |        |            |
| ATOM | 3846 | CD1 | ILE | X | 331 | 6.001  | -97.892 | 48.164 | 1.00123.74 |
| C    |      |     |     |   |     |        |         |        |            |
| ATOM | 3847 | N   | THR | X | 332 | 10.288 | -96.198 | 51.003 | 1.00 92.22 |
| N    |      |     |     |   |     |        |         |        |            |
| ATOM | 3848 | CA  | THR | X | 332 | 11.704 | -96.206 | 51.372 | 1.00101.24 |
| C    |      |     |     |   |     |        |         |        |            |
| ATOM | 3849 | C   | THR | X | 332 | 12.078 | -94.877 | 52.117 | 1.00102.17 |
| C    |      |     |     |   |     |        |         |        |            |
| ATOM | 3850 | O   | THR | X | 332 | 11.251 | -93.965 | 52.284 | 1.00 97.04 |
| O    |      |     |     |   |     |        |         |        |            |
| ATOM | 3851 | CB  | THR | X | 332 | 12.617 | -96.562 | 50.120 | 1.00103.23 |
| C    |      |     |     |   |     |        |         |        |            |

|      |      |     |     |   |     |        |         |        |            |
|------|------|-----|-----|---|-----|--------|---------|--------|------------|
| ATOM | 3852 | OG1 | THR | X | 332 | 13.659 | -97.495 | 50.480 | 1.00111.02 |
| O    |      |     |     |   |     |        |         |        |            |
| ATOM | 3853 | CG2 | THR | X | 332 | 13.246 | -95.334 | 49.502 | 1.00102.89 |
| C    |      |     |     |   |     |        |         |        |            |
| ATOM | 3854 | N   | THR | X | 333 | 13.297 | -94.815 | 52.629 | 1.00102.69 |
| N    |      |     |     |   |     |        |         |        |            |
| ATOM | 3855 | CA  | THR | X | 333 | 13.771 | -93.669 | 53.397 | 1.00 99.47 |
| C    |      |     |     |   |     |        |         |        |            |
| ATOM | 3856 | C   | THR | X | 333 | 15.077 | -93.115 | 52.855 | 1.00 98.18 |
| C    |      |     |     |   |     |        |         |        |            |
| ATOM | 3857 | O   | THR | X | 333 | 15.704 | -93.745 | 51.997 | 1.00103.67 |
| O    |      |     |     |   |     |        |         |        |            |
| ATOM | 3858 | CB  | THR | X | 333 | 14.153 | -94.134 | 54.774 | 1.00101.26 |
| C    |      |     |     |   |     |        |         |        |            |
| ATOM | 3859 | OG1 | THR | X | 333 | 15.565 | -94.315 | 54.773 | 1.00101.65 |
| O    |      |     |     |   |     |        |         |        |            |
| ATOM | 3860 | CG2 | THR | X | 333 | 13.432 | -95.491 | 55.156 | 1.00 99.93 |
| C    |      |     |     |   |     |        |         |        |            |
| ATOM | 3861 | N   | LYS | X | 334 | 15.491 | -91.956 | 53.378 | 1.00 96.71 |
| N    |      |     |     |   |     |        |         |        |            |
| ATOM | 3862 | CA  | LYS | X | 334 | 16.781 | -91.370 | 53.021 | 1.00101.40 |
| C    |      |     |     |   |     |        |         |        |            |
| ATOM | 3863 | C   | LYS | X | 334 | 17.856 | -92.326 | 53.416 | 1.00107.05 |
| C    |      |     |     |   |     |        |         |        |            |
| ATOM | 3864 | O   | LYS | X | 334 | 18.713 | -92.605 | 52.613 | 1.00106.25 |
| O    |      |     |     |   |     |        |         |        |            |
| ATOM | 3865 | CB  | LYS | X | 334 | 17.037 | -89.973 | 53.597 | 1.00107.16 |
| C    |      |     |     |   |     |        |         |        |            |
| ATOM | 3866 | CG  | LYS | X | 334 | 18.421 | -89.379 | 53.216 | 1.00114.81 |
| C    |      |     |     |   |     |        |         |        |            |
| ATOM | 3867 | CD  | LYS | X | 334 | 19.137 | -88.647 | 54.409 | 1.00127.96 |
| C    |      |     |     |   |     |        |         |        |            |
| ATOM | 3868 | CE  | LYS | X | 334 | 20.689 | -88.642 | 54.322 | 1.00131.58 |
| C    |      |     |     |   |     |        |         |        |            |
| ATOM | 3869 | NZ  | LYS | X | 334 | 21.366 | -87.297 | 54.273 | 1.00130.68 |
| N1+  |      |     |     |   |     |        |         |        |            |
| ATOM | 3870 | N   | ASN | X | 335 | 17.785 | -92.868 | 54.632 | 1.00125.12 |
| N    |      |     |     |   |     |        |         |        |            |
| ATOM | 3871 | CA  | ASN | X | 335 | 18.746 | -93.865 | 55.131 | 1.00140.96 |
| C    |      |     |     |   |     |        |         |        |            |
| ATOM | 3872 | C   | ASN | X | 335 | 19.189 | -94.872 | 54.056 | 1.00135.10 |
| C    |      |     |     |   |     |        |         |        |            |
| ATOM | 3873 | O   | ASN | X | 335 | 20.354 | -95.253 | 54.002 | 1.00122.64 |
| O    |      |     |     |   |     |        |         |        |            |
| ATOM | 3874 | CB  | ASN | X | 335 | 18.173 | -94.642 | 56.370 | 1.00160.15 |
| C    |      |     |     |   |     |        |         |        |            |
| ATOM | 3875 | CG  | ASN | X | 335 | 17.368 | -93.751 | 57.353 | 1.00176.10 |
| C    |      |     |     |   |     |        |         |        |            |
| ATOM | 3876 | OD1 | ASN | X | 335 | 16.187 | -94.036 | 57.651 | 1.00184.58 |
| O    |      |     |     |   |     |        |         |        |            |
| ATOM | 3877 | ND2 | ASN | X | 335 | 18.018 | -92.715 | 57.903 | 1.00181.77 |
| N    |      |     |     |   |     |        |         |        |            |
| ATOM | 3878 | N   | GLU | X | 336 | 18.246 | -95.299 | 53.218 | 1.00135.00 |
| N    |      |     |     |   |     |        |         |        |            |

|      |      |     |     |   |     |        |         |        |            |
|------|------|-----|-----|---|-----|--------|---------|--------|------------|
| ATOM | 3879 | CA  | GLU | X | 336 | 18.470 | -96.423 | 52.313 | 1.00130.36 |
| C    |      |     |     |   |     |        |         |        |            |
| ATOM | 3880 | C   | GLU | X | 336 | 19.046 | -96.025 | 50.943 | 1.00111.76 |
| C    |      |     |     |   |     |        |         |        |            |
| ATOM | 3881 | O   | GLU | X | 336 | 19.567 | -96.876 | 50.225 | 1.00124.32 |
| O    |      |     |     |   |     |        |         |        |            |
| ATOM | 3882 | CB  | GLU | X | 336 | 17.198 | -97.286 | 52.196 | 1.00139.12 |
| C    |      |     |     |   |     |        |         |        |            |
| ATOM | 3883 | CG  | GLU | X | 336 | 16.494 | -97.617 | 53.558 | 1.00157.58 |
| C    |      |     |     |   |     |        |         |        |            |
| ATOM | 3884 | CD  | GLU | X | 336 | 17.160 | -98.712 | 54.467 | 1.00165.64 |
| C    |      |     |     |   |     |        |         |        |            |
| ATOM | 3885 | OE1 | GLU | X | 336 | 16.503 | -99.770 | 54.702 | 1.00148.85 |
| O    |      |     |     |   |     |        |         |        |            |
| ATOM | 3886 | OE2 | GLU | X | 336 | 18.246 | -98.465 | 55.091 | 1.00176.50 |
| O1-  |      |     |     |   |     |        |         |        |            |
| ATOM | 3887 | N   | ILE | X | 337 | 18.995 | -94.766 | 50.606 | 1.00 99.77 |
| N    |      |     |     |   |     |        |         |        |            |
| ATOM | 3888 | CA  | ILE | X | 337 | 19.556 | -94.262 | 49.371 | 1.00 99.01 |
| C    |      |     |     |   |     |        |         |        |            |
| ATOM | 3889 | C   | ILE | X | 337 | 21.067 | -94.426 | 49.350 | 1.00100.03 |
| C    |      |     |     |   |     |        |         |        |            |
| ATOM | 3890 | O   | ILE | X | 337 | 21.749 | -94.034 | 50.279 | 1.00103.34 |
| O    |      |     |     |   |     |        |         |        |            |
| ATOM | 3891 | CB  | ILE | X | 337 | 19.260 | -92.782 | 49.320 | 1.00103.90 |
| C    |      |     |     |   |     |        |         |        |            |
| ATOM | 3892 | CG1 | ILE | X | 337 | 17.778 | -92.551 | 48.994 | 1.00101.66 |
| C    |      |     |     |   |     |        |         |        |            |
| ATOM | 3893 | CG2 | ILE | X | 337 | 20.187 | -92.082 | 48.354 | 1.00109.72 |
| C    |      |     |     |   |     |        |         |        |            |
| ATOM | 3894 | CD1 | ILE | X | 337 | 17.388 | -91.079 | 48.991 | 1.00 98.60 |
| C    |      |     |     |   |     |        |         |        |            |
| ATOM | 3895 | N   | PHE | X | 338 | 21.588 | -94.988 | 48.280 | 1.00102.53 |
| N    |      |     |     |   |     |        |         |        |            |
| ATOM | 3896 | CA  | PHE | X | 338 | 23.039 | -94.931 | 48.022 | 1.00111.21 |
| C    |      |     |     |   |     |        |         |        |            |
| ATOM | 3897 | C   | PHE | X | 338 | 23.367 | -94.892 | 46.551 | 1.00112.20 |
| C    |      |     |     |   |     |        |         |        |            |
| ATOM | 3898 | O   | PHE | X | 338 | 22.549 | -95.297 | 45.723 | 1.00110.84 |
| O    |      |     |     |   |     |        |         |        |            |
| ATOM | 3899 | CB  | PHE | X | 338 | 23.705 | -96.144 | 48.585 | 1.00118.02 |
| C    |      |     |     |   |     |        |         |        |            |
| ATOM | 3900 | CG  | PHE | X | 338 | 23.295 | -97.413 | 47.895 | 1.00118.87 |
| C    |      |     |     |   |     |        |         |        |            |
| ATOM | 3901 | CD1 | PHE | X | 338 | 22.091 | -98.025 | 48.218 | 1.00117.15 |
| C    |      |     |     |   |     |        |         |        |            |
| ATOM | 3902 | CD2 | PHE | X | 338 | 24.040 | -97.919 | 46.851 | 1.00116.29 |
| C    |      |     |     |   |     |        |         |        |            |
| ATOM | 3903 | CE1 | PHE | X | 338 | 21.707 | -99.179 | 47.605 | 1.00112.76 |
| C    |      |     |     |   |     |        |         |        |            |
| ATOM | 3904 | CE2 | PHE | X | 338 | 23.650 | -99.065 | 46.221 | 1.00114.24 |
| C    |      |     |     |   |     |        |         |        |            |
| ATOM | 3905 | CZ  | PHE | X | 338 | 22.488 | -99.699 | 46.602 | 1.00115.65 |
| C    |      |     |     |   |     |        |         |        |            |

|      |      |     |           |        |          |        |            |
|------|------|-----|-----------|--------|----------|--------|------------|
| ATOM | 3906 | N   | SER X 339 | 24.584 | -94.439  | 46.287 | 1.00116.97 |
| N    |      |     |           |        |          |        |            |
| ATOM | 3907 | CA  | SER X 339 | 25.052 | -94.117  | 44.928 | 1.00126.88 |
| C    |      |     |           |        |          |        |            |
| ATOM | 3908 | C   | SER X 339 | 25.705 | -95.313  | 44.312 | 1.00128.67 |
| C    |      |     |           |        |          |        |            |
| ATOM | 3909 | O   | SER X 339 | 26.889 | -95.506  | 44.499 | 1.00132.23 |
| O    |      |     |           |        |          |        |            |
| ATOM | 3910 | CB  | SER X 339 | 26.081 | -92.954  | 44.982 | 1.00130.11 |
| C    |      |     |           |        |          |        |            |
| ATOM | 3911 | OG  | SER X 339 | 25.488 | -91.674  | 44.784 | 1.00125.48 |
| O    |      |     |           |        |          |        |            |
| ATOM | 3912 | N   | LEU X 340 | 24.939 | -96.148  | 43.620 | 1.00121.02 |
| N    |      |     |           |        |          |        |            |
| ATOM | 3913 | CA  | LEU X 340 | 25.531 | -97.187  | 42.828 | 1.00117.69 |
| C    |      |     |           |        |          |        |            |
| ATOM | 3914 | C   | LEU X 340 | 26.239 | -96.564  | 41.671 | 1.00118.99 |
| C    |      |     |           |        |          |        |            |
| ATOM | 3915 | O   | LEU X 340 | 27.295 | -97.010  | 41.278 | 1.00121.70 |
| O    |      |     |           |        |          |        |            |
| ATOM | 3916 | CB  | LEU X 340 | 24.480 | -98.130  | 42.299 | 1.00113.59 |
| C    |      |     |           |        |          |        |            |
| ATOM | 3917 | CG  | LEU X 340 | 24.292 | -99.431  | 43.042 | 1.00113.09 |
| C    |      |     |           |        |          |        |            |
| ATOM | 3918 | CD1 | LEU X 340 | 23.726 | -100.475 | 42.100 | 1.00115.67 |
| C    |      |     |           |        |          |        |            |
| ATOM | 3919 | CD2 | LEU X 340 | 25.605 | -99.925  | 43.607 | 1.00113.98 |
| C    |      |     |           |        |          |        |            |
| ATOM | 3920 | N   | SER X 341 | 25.612 | -95.571  | 41.084 | 1.00121.29 |
| N    |      |     |           |        |          |        |            |
| ATOM | 3921 | CA  | SER X 341 | 26.204 | -94.865  | 39.976 | 1.00134.53 |
| C    |      |     |           |        |          |        |            |
| ATOM | 3922 | C   | SER X 341 | 27.114 | -93.828  | 40.538 | 1.00135.01 |
| C    |      |     |           |        |          |        |            |
| ATOM | 3923 | O   | SER X 341 | 26.855 | -93.265  | 41.577 | 1.00143.88 |
| O    |      |     |           |        |          |        |            |
| ATOM | 3924 | CB  | SER X 341 | 25.144 | -94.166  | 39.087 | 1.00143.48 |
| C    |      |     |           |        |          |        |            |
| ATOM | 3925 | OG  | SER X 341 | 25.746 | -93.398  | 38.025 | 1.00148.40 |
| O    |      |     |           |        |          |        |            |
| ATOM | 3926 | N   | LEU X 342 | 28.167 | -93.513  | 39.798 | 1.00131.15 |
| N    |      |     |           |        |          |        |            |
| ATOM | 3927 | CA  | LEU X 342 | 29.053 | -92.474  | 40.216 | 1.00131.73 |
| C    |      |     |           |        |          |        |            |
| ATOM | 3928 | C   | LEU X 342 | 28.218 | -91.208  | 40.314 | 1.00125.65 |
| C    |      |     |           |        |          |        |            |
| ATOM | 3929 | O   | LEU X 342 | 28.339 | -90.442  | 41.244 | 1.00125.10 |
| O    |      |     |           |        |          |        |            |
| ATOM | 3930 | CB  | LEU X 342 | 30.230 | -92.243  | 39.251 | 1.00134.32 |
| C    |      |     |           |        |          |        |            |
| ATOM | 3931 | CG  | LEU X 342 | 31.077 | -90.989  | 39.646 | 1.00136.74 |
| C    |      |     |           |        |          |        |            |
| ATOM | 3932 | CD1 | LEU X 342 | 32.583 | -91.280  | 39.729 | 1.00134.40 |
| C    |      |     |           |        |          |        |            |

|      |      |     |     |   |     |        |         |        |            |
|------|------|-----|-----|---|-----|--------|---------|--------|------------|
| ATOM | 3933 | CD2 | LEU | X | 342 | 30.775 | -89.777 | 38.742 | 1.00135.66 |
| C    |      |     |     |   |     |        |         |        |            |
| ATOM | 3934 | N   | CYS | X | 343 | 27.333 | -91.028 | 39.364 | 1.00128.03 |
| N    |      |     |     |   |     |        |         |        |            |
| ATOM | 3935 | CA  | CYS | X | 343 | 26.631 | -89.797 | 39.293 | 1.00133.64 |
| C    |      |     |     |   |     |        |         |        |            |
| ATOM | 3936 | C   | CYS | X | 343 | 25.693 | -89.519 | 40.402 | 1.00127.85 |
| C    |      |     |     |   |     |        |         |        |            |
| ATOM | 3937 | O   | CYS | X | 343 | 25.507 | -88.349 | 40.713 | 1.00131.45 |
| O    |      |     |     |   |     |        |         |        |            |
| ATOM | 3938 | CB  | CYS | X | 343 | 26.064 | -89.553 | 37.938 | 1.00144.26 |
| C    |      |     |     |   |     |        |         |        |            |
| ATOM | 3939 | SG  | CYS | X | 343 | 27.426 | -88.849 | 37.000 | 1.00171.06 |
| S    |      |     |     |   |     |        |         |        |            |
| ATOM | 3940 | N   | GLY | X | 344 | 25.110 | -90.521 | 41.030 | 1.00123.99 |
| N    |      |     |     |   |     |        |         |        |            |
| ATOM | 3941 | CA  | GLY | X | 344 | 24.340 | -90.248 | 42.209 | 1.00122.33 |
| C    |      |     |     |   |     |        |         |        |            |
| ATOM | 3942 | C   | GLY | X | 344 | 23.598 | -91.429 | 42.681 | 1.00122.08 |
| C    |      |     |     |   |     |        |         |        |            |
| ATOM | 3943 | O   | GLY | X | 344 | 23.670 | -92.499 | 42.090 | 1.00118.26 |
| O    |      |     |     |   |     |        |         |        |            |
| ATOM | 3944 | N   | PRO | X | 345 | 22.743 | -91.213 | 43.659 | 1.00127.01 |
| N    |      |     |     |   |     |        |         |        |            |
| ATOM | 3945 | CA  | PRO | X | 345 | 21.681 | -92.198 | 43.908 | 1.00130.18 |
| C    |      |     |     |   |     |        |         |        |            |
| ATOM | 3946 | C   | PRO | X | 345 | 20.592 | -92.194 | 42.839 | 1.00128.82 |
| C    |      |     |     |   |     |        |         |        |            |
| ATOM | 3947 | O   | PRO | X | 345 | 19.705 | -93.019 | 42.858 | 1.00153.85 |
| O    |      |     |     |   |     |        |         |        |            |
| ATOM | 3948 | CB  | PRO | X | 345 | 21.119 | -91.752 | 45.252 | 1.00125.90 |
| C    |      |     |     |   |     |        |         |        |            |
| ATOM | 3949 | CG  | PRO | X | 345 | 21.334 | -90.268 | 45.274 | 1.00124.96 |
| C    |      |     |     |   |     |        |         |        |            |
| ATOM | 3950 | CD  | PRO | X | 345 | 22.608 | -90.014 | 44.506 | 1.00127.27 |
| C    |      |     |     |   |     |        |         |        |            |
| ATOM | 3951 | N   | MET | X | 346 | 20.652 | -91.203 | 41.951 | 1.00110.49 |
| N    |      |     |     |   |     |        |         |        |            |
| ATOM | 3952 | CA  | MET | X | 346 | 19.774 | -91.110 | 40.804 | 1.00 96.37 |
| C    |      |     |     |   |     |        |         |        |            |
| ATOM | 3953 | C   | MET | X | 346 | 20.504 | -90.685 | 39.547 | 1.00 97.61 |
| C    |      |     |     |   |     |        |         |        |            |
| ATOM | 3954 | O   | MET | X | 346 | 21.327 | -89.760 | 39.557 | 1.00 96.29 |
| O    |      |     |     |   |     |        |         |        |            |
| ATOM | 3955 | CB  | MET | X | 346 | 18.725 | -90.096 | 41.029 | 1.00 91.02 |
| C    |      |     |     |   |     |        |         |        |            |
| ATOM | 3956 | CG  | MET | X | 346 | 17.416 | -90.528 | 40.476 | 1.00 90.08 |
| C    |      |     |     |   |     |        |         |        |            |
| ATOM | 3957 | SD  | MET | X | 346 | 16.107 | -89.597 | 41.299 | 1.00 92.45 |
| S    |      |     |     |   |     |        |         |        |            |
| ATOM | 3958 | CE  | MET | X | 346 | 15.962 | -88.135 | 40.282 | 1.00 89.55 |
| C    |      |     |     |   |     |        |         |        |            |
| ATOM | 3959 | N   | ALA | X | 347 | 20.145 | -91.379 | 38.452 | 1.00100.45 |
| N    |      |     |     |   |     |        |         |        |            |

|      |      |     |     |   |     |        |         |        |      |        |
|------|------|-----|-----|---|-----|--------|---------|--------|------|--------|
| ATOM | 3960 | CA  | ALA | X | 347 | 20.518 | -90.994 | 37.093 | 1.00 | 98.87  |
| C    |      |     |     |   |     |        |         |        |      |        |
| ATOM | 3961 | C   | ALA | X | 347 | 19.301 | -91.256 | 36.213 | 1.00 | 95.87  |
| C    |      |     |     |   |     |        |         |        |      |        |
| ATOM | 3962 | O   | ALA | X | 347 | 18.355 | -91.899 | 36.626 | 1.00 | 88.47  |
| O    |      |     |     |   |     |        |         |        |      |        |
| ATOM | 3963 | CB  | ALA | X | 347 | 21.705 | -91.825 | 36.608 | 1.00 | 99.60  |
| C    |      |     |     |   |     |        |         |        |      |        |
| ATOM | 3964 | N   | ALA | X | 348 | 19.394 | -90.855 | 34.950 | 1.00 | 96.56  |
| N    |      |     |     |   |     |        |         |        |      |        |
| ATOM | 3965 | CA  | ALA | X | 348 | 18.423 | -91.268 | 33.936 | 1.00 | 93.33  |
| C    |      |     |     |   |     |        |         |        |      |        |
| ATOM | 3966 | C   | ALA | X | 348 | 18.923 | -92.535 | 33.190 | 1.00 | 91.44  |
| C    |      |     |     |   |     |        |         |        |      |        |
| ATOM | 3967 | O   | ALA | X | 348 | 20.110 | -92.715 | 32.903 | 1.00 | 90.31  |
| O    |      |     |     |   |     |        |         |        |      |        |
| ATOM | 3968 | CB  | ALA | X | 348 | 18.204 | -90.100 | 32.954 | 1.00 | 91.88  |
| C    |      |     |     |   |     |        |         |        |      |        |
| ATOM | 3969 | N   | TYR | X | 349 | 17.982 | -93.453 | 32.962 | 1.00 | 90.45  |
| N    |      |     |     |   |     |        |         |        |      |        |
| ATOM | 3970 | CA  | TYR | X | 349 | 18.234 | -94.636 | 32.115 | 1.00 | 92.16  |
| C    |      |     |     |   |     |        |         |        |      |        |
| ATOM | 3971 | C   | TYR | X | 349 | 17.113 | -94.896 | 31.088 | 1.00 | 93.77  |
| C    |      |     |     |   |     |        |         |        |      |        |
| ATOM | 3972 | O   | TYR | X | 349 | 15.945 | -94.703 | 31.416 | 1.00 | 104.28 |
| O    |      |     |     |   |     |        |         |        |      |        |
| ATOM | 3973 | CB  | TYR | X | 349 | 18.468 | -95.851 | 33.006 | 1.00 | 90.11  |
| C    |      |     |     |   |     |        |         |        |      |        |
| ATOM | 3974 | CG  | TYR | X | 349 | 19.539 | -95.694 | 34.072 | 1.00 | 92.71  |
| C    |      |     |     |   |     |        |         |        |      |        |
| ATOM | 3975 | CD1 | TYR | X | 349 | 20.896 | -95.870 | 33.756 | 1.00 | 93.66  |
| C    |      |     |     |   |     |        |         |        |      |        |
| ATOM | 3976 | CD2 | TYR | X | 349 | 19.173 | -95.391 | 35.394 | 1.00 | 98.47  |
| C    |      |     |     |   |     |        |         |        |      |        |
| ATOM | 3977 | CE1 | TYR | X | 349 | 21.871 | -95.766 | 34.765 | 1.00 | 96.80  |
| C    |      |     |     |   |     |        |         |        |      |        |
| ATOM | 3978 | CE2 | TYR | X | 349 | 20.136 | -95.385 | 36.421 | 1.00 | 100.48 |
| C    |      |     |     |   |     |        |         |        |      |        |
| ATOM | 3979 | CZ  | TYR | X | 349 | 21.495 | -95.550 | 36.105 | 1.00 | 100.20 |
| C    |      |     |     |   |     |        |         |        |      |        |
| ATOM | 3980 | OH  | TYR | X | 349 | 22.441 | -95.447 | 37.079 | 1.00 | 101.31 |
| O    |      |     |     |   |     |        |         |        |      |        |
| ATOM | 3981 | N   | VAL | X | 350 | 17.418 | -95.355 | 29.860 | 1.00 | 88.60  |
| N    |      |     |     |   |     |        |         |        |      |        |
| ATOM | 3982 | CA  | VAL | X | 350 | 16.386 | -95.739 | 28.862 | 1.00 | 84.84  |
| C    |      |     |     |   |     |        |         |        |      |        |
| ATOM | 3983 | C   | VAL | X | 350 | 16.102 | -97.233 | 28.894 | 1.00 | 78.08  |
| C    |      |     |     |   |     |        |         |        |      |        |
| ATOM | 3984 | O   | VAL | X | 350 | 16.991 | -98.085 | 28.782 | 1.00 | 73.29  |
| O    |      |     |     |   |     |        |         |        |      |        |
| ATOM | 3985 | CB  | VAL | X | 350 | 16.643 | -95.353 | 27.385 | 1.00 | 89.09  |
| C    |      |     |     |   |     |        |         |        |      |        |
| ATOM | 3986 | CG1 | VAL | X | 350 | 16.008 | -94.022 | 26.950 | 1.00 | 93.15  |
| C    |      |     |     |   |     |        |         |        |      |        |

|      |      |     |     |   |     |        |          |        |      |        |
|------|------|-----|-----|---|-----|--------|----------|--------|------|--------|
| ATOM | 3987 | CG2 | VAL | X | 350 | 18.114 | -95.458  | 27.000 | 1.00 | 90.45  |
| C    |      |     |     |   |     |        |          |        |      |        |
| ATOM | 3988 | N   | ASN | X | 351 | 14.823 | -97.569  | 28.846 | 1.00 | 75.39  |
| N    |      |     |     |   |     |        |          |        |      |        |
| ATOM | 3989 | CA  | ASN | X | 351 | 14.387 | -98.940  | 28.650 | 1.00 | 76.29  |
| C    |      |     |     |   |     |        |          |        |      |        |
| ATOM | 3990 | C   | ASN | X | 351 | 14.376 | -99.349  | 27.153 | 1.00 | 81.51  |
| C    |      |     |     |   |     |        |          |        |      |        |
| ATOM | 3991 | O   | ASN | X | 351 | 14.820 | -98.563  | 26.308 | 1.00 | 89.72  |
| O    |      |     |     |   |     |        |          |        |      |        |
| ATOM | 3992 | CB  | ASN | X | 351 | 13.099 | -99.114  | 29.441 | 1.00 | 73.78  |
| C    |      |     |     |   |     |        |          |        |      |        |
| ATOM | 3993 | CG  | ASN | X | 351 | 11.829 | -98.792  | 28.703 | 1.00 | 71.35  |
| C    |      |     |     |   |     |        |          |        |      |        |
| ATOM | 3994 | OD1 | ASN | X | 351 | 11.797 | -98.298  | 27.586 | 1.00 | 71.02  |
| O    |      |     |     |   |     |        |          |        |      |        |
| ATOM | 3995 | ND2 | ASN | X | 351 | 10.745 | -99.172  | 29.315 | 1.00 | 69.39  |
| N    |      |     |     |   |     |        |          |        |      |        |
| ATOM | 3996 | N   | PRO | X | 352 | 14.026 | -100.600 | 26.779 | 1.00 | 82.83  |
| N    |      |     |     |   |     |        |          |        |      |        |
| ATOM | 3997 | CA  | PRO | X | 352 | 14.182 | -101.057 | 25.397 | 1.00 | 82.89  |
| C    |      |     |     |   |     |        |          |        |      |        |
| ATOM | 3998 | C   | PRO | X | 352 | 13.198 | -100.382 | 24.450 | 1.00 | 82.95  |
| C    |      |     |     |   |     |        |          |        |      |        |
| ATOM | 3999 | O   | PRO | X | 352 | 13.446 | -100.351 | 23.256 | 1.00 | 91.50  |
| O    |      |     |     |   |     |        |          |        |      |        |
| ATOM | 4000 | CB  | PRO | X | 352 | 13.957 | -102.572 | 25.382 | 1.00 | 84.17  |
| C    |      |     |     |   |     |        |          |        |      |        |
| ATOM | 4001 | CG  | PRO | X | 352 | 13.828 | -102.974 | 26.843 | 1.00 | 84.93  |
| C    |      |     |     |   |     |        |          |        |      |        |
| ATOM | 4002 | CD  | PRO | X | 352 | 13.490 | -101.682 | 27.585 | 1.00 | 83.19  |
| C    |      |     |     |   |     |        |          |        |      |        |
| ATOM | 4003 | N   | HIP | X | 353 | 12.091 | -99.844  | 24.973 | 1.00 | 81.77  |
| N    |      |     |     |   |     |        |          |        |      |        |
| ATOM | 4004 | CA  | HIP | X | 353 | 11.041 | -99.170  | 24.207 | 1.00 | 86.93  |
| C    |      |     |     |   |     |        |          |        |      |        |
| ATOM | 4005 | C   | HIP | X | 353 | 11.167 | -97.649  | 24.214 | 1.00 | 88.96  |
| C    |      |     |     |   |     |        |          |        |      |        |
| ATOM | 4006 | O   | HIP | X | 353 | 10.220 | -96.972  | 23.835 | 1.00 | 96.19  |
| O    |      |     |     |   |     |        |          |        |      |        |
| ATOM | 4007 | CB  | HIP | X | 353 | 9.677  | -99.668  | 24.689 | 1.00 | 88.39  |
| C    |      |     |     |   |     |        |          |        |      |        |
| ATOM | 4008 | CG  | HIP | X | 353 | 9.498  | -101.125 | 24.363 | 1.00 | 91.33  |
| C    |      |     |     |   |     |        |          |        |      |        |
| ATOM | 4009 | ND1 | HIP | X | 353 | 9.407  | -101.652 | 23.087 | 1.00 | 100.84 |
| N1+  |      |     |     |   |     |        |          |        |      |        |
| ATOM | 4010 | CD2 | HIP | X | 353 | 9.583  | -102.162 | 25.248 | 1.00 | 91.96  |
| C    |      |     |     |   |     |        |          |        |      |        |
| ATOM | 4011 | CE1 | HIP | X | 353 | 9.421  | -102.995 | 23.197 | 1.00 | 103.45 |
| C    |      |     |     |   |     |        |          |        |      |        |
| ATOM | 4012 | NE2 | HIP | X | 353 | 9.516  | -103.320 | 24.501 | 1.00 | 95.61  |
| N    |      |     |     |   |     |        |          |        |      |        |
| ATOM | 4013 | N   | GLY | X | 354 | 12.325 | -97.136  | 24.625 | 1.00 | 87.40  |
| N    |      |     |     |   |     |        |          |        |      |        |



|      |      |     |     |   |     |        |         |        |      |        |
|------|------|-----|-----|---|-----|--------|---------|--------|------|--------|
| ATOM | 4014 | CA  | GLY | X | 354 | 12.671 | -95.728 | 24.489 | 1.00 | 89.69  |
| C    |      |     |     |   |     |        |         |        |      |        |
| ATOM | 4015 | C   | GLY | X | 354 | 12.134 | -94.779 | 25.562 | 1.00 | 87.24  |
| C    |      |     |     |   |     |        |         |        |      |        |
| ATOM | 4016 | O   | GLY | X | 354 | 12.309 | -93.568 | 25.481 | 1.00 | 82.91  |
| O    |      |     |     |   |     |        |         |        |      |        |
| ATOM | 4017 | N   | TYR | X | 355 | 11.579 | -95.387 | 26.623 | 1.00 | 87.19  |
| N    |      |     |     |   |     |        |         |        |      |        |
| ATOM | 4018 | CA  | TYR | X | 355 | 11.105 | -94.727 | 27.832 | 1.00 | 85.84  |
| C    |      |     |     |   |     |        |         |        |      |        |
| ATOM | 4019 | C   | TYR | X | 355 | 12.240 | -94.395 | 28.794 | 1.00 | 80.53  |
| C    |      |     |     |   |     |        |         |        |      |        |
| ATOM | 4020 | O   | TYR | X | 355 | 13.059 | -95.265 | 29.107 | 1.00 | 75.67  |
| O    |      |     |     |   |     |        |         |        |      |        |
| ATOM | 4021 | CB  | TYR | X | 355 | 10.060 | -95.593 | 28.567 | 1.00 | 88.45  |
| C    |      |     |     |   |     |        |         |        |      |        |
| ATOM | 4022 | CG  | TYR | X | 355 | 8.698  | -95.622 | 27.922 | 1.00 | 93.59  |
| C    |      |     |     |   |     |        |         |        |      |        |
| ATOM | 4023 | CD1 | TYR | X | 355 | 7.999  | -94.418 | 27.913 | 1.00 | 101.68 |
| C    |      |     |     |   |     |        |         |        |      |        |
| ATOM | 4024 | CD2 | TYR | X | 355 | 8.126  | -96.775 | 27.336 | 1.00 | 94.05  |
| C    |      |     |     |   |     |        |         |        |      |        |
| ATOM | 4025 | CE1 | TYR | X | 355 | 6.773  | -94.343 | 27.264 | 1.00 | 106.05 |
| C    |      |     |     |   |     |        |         |        |      |        |
| ATOM | 4026 | CE2 | TYR | X | 355 | 6.841  | -96.700 | 26.739 | 1.00 | 99.87  |
| C    |      |     |     |   |     |        |         |        |      |        |
| ATOM | 4027 | CZ  | TYR | X | 355 | 6.166  | -95.457 | 26.691 | 1.00 | 103.70 |
| C    |      |     |     |   |     |        |         |        |      |        |
| ATOM | 4028 | OH  | TYR | X | 355 | 4.939  | -95.256 | 26.139 | 1.00 | 99.78  |
| O    |      |     |     |   |     |        |         |        |      |        |
| ATOM | 4029 | N   | VAL | X | 356 | 12.202 | -93.192 | 29.377 | 1.00 | 81.25  |
| N    |      |     |     |   |     |        |         |        |      |        |
| ATOM | 4030 | CA  | VAL | X | 356 | 13.280 | -92.714 | 30.264 | 1.00 | 86.66  |
| C    |      |     |     |   |     |        |         |        |      |        |
| ATOM | 4031 | C   | VAL | X | 356 | 12.883 | -92.923 | 31.735 | 1.00 | 85.25  |
| C    |      |     |     |   |     |        |         |        |      |        |
| ATOM | 4032 | O   | VAL | X | 356 | 11.795 | -92.554 | 32.185 | 1.00 | 88.11  |
| O    |      |     |     |   |     |        |         |        |      |        |
| ATOM | 4033 | CB  | VAL | X | 356 | 13.645 | -91.238 | 30.122 | 1.00 | 92.44  |
| C    |      |     |     |   |     |        |         |        |      |        |
| ATOM | 4034 | CG1 | VAL | X | 356 | 15.148 | -91.079 | 30.312 | 1.00 | 93.27  |
| C    |      |     |     |   |     |        |         |        |      |        |
| ATOM | 4035 | CG2 | VAL | X | 356 | 13.169 | -90.647 | 28.798 | 1.00 | 96.97  |
| C    |      |     |     |   |     |        |         |        |      |        |
| ATOM | 4036 | N   | HIP | X | 357 | 13.802 | -93.433 | 32.541 | 1.00 | 82.77  |
| N    |      |     |     |   |     |        |         |        |      |        |
| ATOM | 4037 | CA  | HIP | X | 357 | 13.599 | -93.683 | 33.960 | 1.00 | 83.80  |
| C    |      |     |     |   |     |        |         |        |      |        |
| ATOM | 4038 | C   | HIP | X | 357 | 14.726 | -93.082 | 34.777 | 1.00 | 87.50  |
| C    |      |     |     |   |     |        |         |        |      |        |
| ATOM | 4039 | O   | HIP | X | 357 | 15.835 | -93.605 | 34.796 | 1.00 | 96.78  |
| O    |      |     |     |   |     |        |         |        |      |        |
| ATOM | 4040 | CB  | HIP | X | 357 | 13.472 | -95.188 | 34.174 | 1.00 | 84.35  |
| C    |      |     |     |   |     |        |         |        |      |        |

|      |      |     |     |   |     |        |         |        |      |        |
|------|------|-----|-----|---|-----|--------|---------|--------|------|--------|
| ATOM | 4041 | CG  | HIP | X | 357 | 12.150 | -95.707 | 33.677 | 1.00 | 84.22  |
| C    |      |     |     |   |     |        |         |        |      |        |
| ATOM | 4042 | ND1 | HIP | X | 357 | 10.948 | -95.576 | 34.345 | 1.00 | 85.46  |
| N1+  |      |     |     |   |     |        |         |        |      |        |
| ATOM | 4043 | CD2 | HIP | X | 357 | 11.937 | -96.457 | 32.553 | 1.00 | 83.48  |
| C    |      |     |     |   |     |        |         |        |      |        |
| ATOM | 4044 | CE1 | HIP | X | 357 | 10.024 | -96.293 | 33.668 | 1.00 | 84.06  |
| C    |      |     |     |   |     |        |         |        |      |        |
| ATOM | 4045 | NE2 | HIP | X | 357 | 10.604 | -96.835 | 32.573 | 1.00 | 83.16  |
| N    |      |     |     |   |     |        |         |        |      |        |
| ATOM | 4046 | N   | GLU | X | 358 | 14.369 | -92.068 | 35.560 | 1.00 | 87.20  |
| N    |      |     |     |   |     |        |         |        |      |        |
| ATOM | 4047 | CA  | GLU | X | 358 | 15.285 | -91.564 | 36.557 | 1.00 | 86.70  |
| C    |      |     |     |   |     |        |         |        |      |        |
| ATOM | 4048 | C   | GLU | X | 358 | 15.116 | -92.492 | 37.791 | 1.00 | 87.27  |
| C    |      |     |     |   |     |        |         |        |      |        |
| ATOM | 4049 | O   | GLU | X | 358 | 14.170 | -92.355 | 38.585 | 1.00 | 91.65  |
| O    |      |     |     |   |     |        |         |        |      |        |
| ATOM | 4050 | CB  | GLU | X | 358 | 15.012 | -90.088 | 36.882 | 1.00 | 85.88  |
| C    |      |     |     |   |     |        |         |        |      |        |
| ATOM | 4051 | CG  | GLU | X | 358 | 14.365 | -89.265 | 35.769 | 1.00 | 86.63  |
| C    |      |     |     |   |     |        |         |        |      |        |
| ATOM | 4052 | CD  | GLU | X | 358 | 14.709 | -87.778 | 35.840 | 1.00 | 86.91  |
| C    |      |     |     |   |     |        |         |        |      |        |
| ATOM | 4053 | OE1 | GLU | X | 358 | 15.913 | -87.442 | 36.093 | 1.00 | 82.15  |
| O    |      |     |     |   |     |        |         |        |      |        |
| ATOM | 4054 | OE2 | GLU | X | 358 | 13.754 | -86.958 | 35.618 | 1.00 | 88.25  |
| O1-  |      |     |     |   |     |        |         |        |      |        |
| ATOM | 4055 | N   | THR | X | 359 | 15.997 | -93.469 | 37.912 | 1.00 | 87.90  |
| N    |      |     |     |   |     |        |         |        |      |        |
| ATOM | 4056 | CA  | THR | X | 359 | 15.804 | -94.489 | 38.920 | 1.00 | 94.43  |
| C    |      |     |     |   |     |        |         |        |      |        |
| ATOM | 4057 | C   | THR | X | 359 | 16.766 | -94.271 | 40.067 | 1.00 | 97.94  |
| C    |      |     |     |   |     |        |         |        |      |        |
| ATOM | 4058 | O   | THR | X | 359 | 17.922 | -93.908 | 39.881 | 1.00 | 104.19 |
| O    |      |     |     |   |     |        |         |        |      |        |
| ATOM | 4059 | CB  | THR | X | 359 | 15.720 | -95.922 | 38.374 | 1.00 | 96.84  |
| C    |      |     |     |   |     |        |         |        |      |        |
| ATOM | 4060 | OG1 | THR | X | 359 | 15.411 | -96.816 | 39.406 | 1.00 | 105.98 |
| O    |      |     |     |   |     |        |         |        |      |        |
| ATOM | 4061 | CG2 | THR | X | 359 | 16.961 | -96.469 | 37.690 | 1.00 | 95.47  |
| C    |      |     |     |   |     |        |         |        |      |        |
| ATOM | 4062 | N   | LEU | X | 360 | 16.231 | -94.518 | 41.265 | 1.00 | 96.77  |
| N    |      |     |     |   |     |        |         |        |      |        |
| ATOM | 4063 | CA  | LEU | X | 360 | 16.907 | -94.288 | 42.528 | 1.00 | 96.75  |
| C    |      |     |     |   |     |        |         |        |      |        |
| ATOM | 4064 | C   | LEU | X | 360 | 17.305 | -95.610 | 43.171 | 1.00 | 92.11  |
| C    |      |     |     |   |     |        |         |        |      |        |
| ATOM | 4065 | O   | LEU | X | 360 | 16.465 | -96.454 | 43.405 | 1.00 | 84.18  |
| O    |      |     |     |   |     |        |         |        |      |        |
| ATOM | 4066 | CB  | LEU | X | 360 | 15.917 | -93.588 | 43.424 | 1.00 | 101.51 |
| C    |      |     |     |   |     |        |         |        |      |        |
| ATOM | 4067 | CG  | LEU | X | 360 | 16.385 | -93.032 | 44.752 | 1.00 | 104.30 |
| C    |      |     |     |   |     |        |         |        |      |        |

|      |      |     |     |   |     |        |          |        |            |
|------|------|-----|-----|---|-----|--------|----------|--------|------------|
| ATOM | 4068 | CD1 | LEU | X | 360 | 17.350 | -91.875  | 44.565 | 1.00102.20 |
| C    |      |     |     |   |     |        |          |        |            |
| ATOM | 4069 | CD2 | LEU | X | 360 | 15.141 | -92.572  | 45.498 | 1.00109.39 |
| C    |      |     |     |   |     |        |          |        |            |
| ATOM | 4070 | N   | THR | X | 361 | 18.581 | -95.762  | 43.455 | 1.00 94.66 |
| N    |      |     |     |   |     |        |          |        |            |
| ATOM | 4071 | CA  | THR | X | 361 | 19.129 | -97.004  | 43.987 | 1.00 95.16 |
| C    |      |     |     |   |     |        |          |        |            |
| ATOM | 4072 | C   | THR | X | 361 | 19.036 | -97.001  | 45.534 | 1.00 91.17 |
| C    |      |     |     |   |     |        |          |        |            |
| ATOM | 4073 | O   | THR | X | 361 | 19.611 | -96.143  | 46.150 | 1.00 86.52 |
| O    |      |     |     |   |     |        |          |        |            |
| ATOM | 4074 | CB  | THR | X | 361 | 20.619 | -97.062  | 43.458 | 1.00 94.42 |
| C    |      |     |     |   |     |        |          |        |            |
| ATOM | 4075 | OG1 | THR | X | 361 | 21.006 | -95.795  | 42.861 | 1.00 88.62 |
| O    |      |     |     |   |     |        |          |        |            |
| ATOM | 4076 | CG2 | THR | X | 361 | 20.691 | -98.038  | 42.386 | 1.00 96.63 |
| C    |      |     |     |   |     |        |          |        |            |
| ATOM | 4077 | N   | VAL | X | 362 | 18.280 | -97.924  | 46.106 | 1.00 88.27 |
| N    |      |     |     |   |     |        |          |        |            |
| ATOM | 4078 | CA  | VAL | X | 362 | 18.042 | -97.961  | 47.521 | 1.00 89.86 |
| C    |      |     |     |   |     |        |          |        |            |
| ATOM | 4079 | C   | VAL | X | 362 | 18.238 | -99.388  | 48.066 | 1.00 95.61 |
| C    |      |     |     |   |     |        |          |        |            |
| ATOM | 4080 | O   | VAL | X | 362 | 18.089 | -100.328 | 47.299 | 1.00100.47 |
| O    |      |     |     |   |     |        |          |        |            |
| ATOM | 4081 | CB  | VAL | X | 362 | 16.631 | -97.384  | 47.842 | 1.00 88.09 |
| C    |      |     |     |   |     |        |          |        |            |
| ATOM | 4082 | CG1 | VAL | X | 362 | 16.575 | -95.913  | 47.493 | 1.00 87.66 |
| C    |      |     |     |   |     |        |          |        |            |
| ATOM | 4083 | CG2 | VAL | X | 362 | 15.516 | -98.098  | 47.115 | 1.00 85.61 |
| C    |      |     |     |   |     |        |          |        |            |
| ATOM | 4084 | N   | TYR | X | 363 | 18.714 | -99.515  | 49.317 | 1.00103.12 |
| N    |      |     |     |   |     |        |          |        |            |
| ATOM | 4085 | CA  | TYR | X | 363 | 19.179 | -100.799 | 49.841 | 1.00106.09 |
| C    |      |     |     |   |     |        |          |        |            |
| ATOM | 4086 | C   | TYR | X | 363 | 18.050 | -101.696 | 50.292 | 1.00104.77 |
| C    |      |     |     |   |     |        |          |        |            |
| ATOM | 4087 | O   | TYR | X | 363 | 17.997 | -102.820 | 49.884 | 1.00113.30 |
| O    |      |     |     |   |     |        |          |        |            |
| ATOM | 4088 | CB  | TYR | X | 363 | 20.061 | -100.585 | 50.999 | 1.00114.07 |
| C    |      |     |     |   |     |        |          |        |            |
| ATOM | 4089 | CG  | TYR | X | 363 | 21.497 | -100.569 | 50.648 | 1.00132.44 |
| C    |      |     |     |   |     |        |          |        |            |
| ATOM | 4090 | CD1 | TYR | X | 363 | 22.098 | -101.673 | 50.049 | 1.00139.59 |
| C    |      |     |     |   |     |        |          |        |            |
| ATOM | 4091 | CD2 | TYR | X | 363 | 22.317 | -99.506  | 51.067 | 1.00151.42 |
| C    |      |     |     |   |     |        |          |        |            |
| ATOM | 4092 | CE1 | TYR | X | 363 | 23.470 | -101.701 | 49.827 | 1.00155.22 |
| C    |      |     |     |   |     |        |          |        |            |
| ATOM | 4093 | CE2 | TYR | X | 363 | 23.689 | -99.519  | 50.851 | 1.00161.72 |
| C    |      |     |     |   |     |        |          |        |            |
| ATOM | 4094 | CZ  | TYR | X | 363 | 24.266 | -100.612 | 50.226 | 1.00163.82 |
| C    |      |     |     |   |     |        |          |        |            |

|      |      |    |           |                |        |            |
|------|------|----|-----------|----------------|--------|------------|
| ATOM | 4095 | OH | TYR X 363 | 25.632-100.637 | 50.039 | 1.00172.11 |
| O    |      |    |           |                |        |            |
| ATOM | 4096 | N  | LYS X 364 | 17.131-101.243 | 51.133 | 1.00101.28 |
| N    |      |    |           |                |        |            |
| ATOM | 4097 | CA | LYS X 364 | 15.828-101.962 | 51.242 | 1.00100.53 |
| C    |      |    |           |                |        |            |
| ATOM | 4098 | C  | LYS X 364 | 14.668-101.116 | 50.713 | 1.00 97.49 |
| C    |      |    |           |                |        |            |
| ATOM | 4099 | O  | LYS X 364 | 14.841 -99.997 | 50.150 | 1.00 90.85 |
| O    |      |    |           |                |        |            |
| ATOM | 4100 | CB | LYS X 364 | 15.539-102.338 | 52.732 | 1.00 0.00  |
| C    |      |    |           |                |        |            |
| ATOM | 4101 | CG | LYS X 364 | 16.659-103.160 | 53.400 | 1.00 0.00  |
| C    |      |    |           |                |        |            |
| ATOM | 4102 | CD | LYS X 364 | 16.957-104.493 | 52.691 | 1.00 0.00  |
| C    |      |    |           |                |        |            |
| ATOM | 4103 | CE | LYS X 364 | 18.014-105.321 | 53.434 | 1.00 0.00  |
| C    |      |    |           |                |        |            |
| ATOM | 4104 | NZ | LYS X 364 | 19.337-104.670 | 53.428 | 1.00 0.00  |
| N1+  |      |    |           |                |        |            |
| ATOM | 4105 | N  | ALA X 365 | 13.458-101.649 | 50.891 | 1.00 99.44 |
| N    |      |    |           |                |        |            |
| ATOM | 4106 | CA | ALA X 365 | 12.220-100.874 | 50.642 | 1.00102.30 |
| C    |      |    |           |                |        |            |
| ATOM | 4107 | C  | ALA X 365 | 10.942-101.725 | 50.818 | 1.00105.63 |
| C    |      |    |           |                |        |            |
| ATOM | 4108 | O  | ALA X 365 | 10.918-102.960 | 50.560 | 1.00102.91 |
| O    |      |    |           |                |        |            |
| ATOM | 4109 | CB | ALA X 365 | 12.247-100.280 | 49.245 | 1.00105.59 |
| C    |      |    |           |                |        |            |
| ATOM | 4110 | N  | CYS X 366 | 9.904-101.063  | 51.292 | 1.00109.13 |
| N    |      |    |           |                |        |            |
| ATOM | 4111 | CA | CYS X 366 | 8.790-101.764  | 51.884 | 1.00115.95 |
| C    |      |    |           |                |        |            |
| ATOM | 4112 | C  | CYS X 366 | 7.559-101.735  | 50.967 | 1.00109.39 |
| C    |      |    |           |                |        |            |
| ATOM | 4113 | O  | CYS X 366 | 7.487-100.952  | 50.019 | 1.00 97.96 |
| O    |      |    |           |                |        |            |
| ATOM | 4114 | CB | CYS X 366 | 8.451-101.160  | 53.283 | 1.00124.19 |
| C    |      |    |           |                |        |            |
| ATOM | 4115 | SG | CYS X 366 | 9.797-100.680  | 54.440 | 1.00126.68 |
| S    |      |    |           |                |        |            |
| ATOM | 4116 | N  | ASN X 367 | 6.583-102.576  | 51.309 | 1.00118.25 |
| N    |      |    |           |                |        |            |
| ATOM | 4117 | CA | ASN X 367 | 5.238-102.541  | 50.702 | 1.00126.57 |
| C    |      |    |           |                |        |            |
| ATOM | 4118 | C  | ASN X 367 | 5.244-102.652  | 49.207 | 1.00122.36 |
| C    |      |    |           |                |        |            |
| ATOM | 4119 | O  | ASN X 367 | 4.496-101.952  | 48.537 | 1.00124.90 |
| O    |      |    |           |                |        |            |
| ATOM | 4120 | CB | ASN X 367 | 4.532-101.235  | 51.061 | 1.00133.42 |
| C    |      |    |           |                |        |            |
| ATOM | 4121 | CG | ASN X 367 | 4.436-101.034  | 52.536 | 1.00138.47 |
| C    |      |    |           |                |        |            |

|      |      |     |     |   |     |                |        |            |
|------|------|-----|-----|---|-----|----------------|--------|------------|
| ATOM | 4122 | OD1 | ASN | X | 367 | 5.277-100.382  | 53.105 | 1.00152.24 |
| O    |      |     |     |   |     |                |        |            |
| ATOM | 4123 | ND2 | ASN | X | 367 | 3.467-101.682  | 53.179 | 1.00144.52 |
| N    |      |     |     |   |     |                |        |            |
| ATOM | 4124 | N   | LEU | X | 368 | 6.056-103.553  | 48.656 | 1.00120.81 |
| N    |      |     |     |   |     |                |        |            |
| ATOM | 4125 | CA  | LEU | X | 368 | 6.018-103.851  | 47.218 | 1.00110.34 |
| C    |      |     |     |   |     |                |        |            |
| ATOM | 4126 | C   | LEU | X | 368 | 5.707-105.329  | 46.980 | 1.00110.82 |
| C    |      |     |     |   |     |                |        |            |
| ATOM | 4127 | O   | LEU | X | 368 | 6.035-106.221  | 47.776 | 1.00128.18 |
| O    |      |     |     |   |     |                |        |            |
| ATOM | 4128 | CB  | LEU | X | 368 | 7.345-103.525  | 46.505 | 1.00102.82 |
| C    |      |     |     |   |     |                |        |            |
| ATOM | 4129 | CG  | LEU | X | 368 | 7.757-102.049  | 46.452 | 1.00101.38 |
| C    |      |     |     |   |     |                |        |            |
| ATOM | 4130 | CD1 | LEU | X | 368 | 9.222-101.864  | 46.033 | 1.00 96.75 |
| C    |      |     |     |   |     |                |        |            |
| ATOM | 4131 | CD2 | LEU | X | 368 | 6.796-101.273  | 45.560 | 1.00 99.20 |
| C    |      |     |     |   |     |                |        |            |
| ATOM | 4132 | N   | ASN | X | 369 | 5.157-105.588  | 45.807 | 1.00106.47 |
| N    |      |     |     |   |     |                |        |            |
| ATOM | 4133 | CA  | ASN | X | 369 | 5.108-106.950  | 45.257 | 1.00107.81 |
| C    |      |     |     |   |     |                |        |            |
| ATOM | 4134 | C   | ASN | X | 369 | 6.099-107.049  | 44.109 | 1.00103.12 |
| C    |      |     |     |   |     |                |        |            |
| ATOM | 4135 | O   | ASN | X | 369 | 6.301-106.087  | 43.345 | 1.00122.45 |
| O    |      |     |     |   |     |                |        |            |
| ATOM | 4136 | CB  | ASN | X | 369 | 3.757-107.295  | 44.652 | 1.00110.66 |
| C    |      |     |     |   |     |                |        |            |
| ATOM | 4137 | CG  | ASN | X | 369 | 2.660-107.358  | 45.662 | 1.00114.06 |
| C    |      |     |     |   |     |                |        |            |
| ATOM | 4138 | OD1 | ASN | X | 369 | 2.851-107.038  | 46.819 | 1.00114.94 |
| O    |      |     |     |   |     |                |        |            |
| ATOM | 4139 | ND2 | ASN | X | 369 | 1.486-107.741  | 45.216 | 1.00118.79 |
| N    |      |     |     |   |     |                |        |            |
| ATOM | 4140 | N   | LEU | X | 370 | 6.601-108.258  | 43.919 | 1.00 93.78 |
| N    |      |     |     |   |     |                |        |            |
| ATOM | 4141 | CA  | LEU | X | 370 | 7.337-108.612  | 42.741 | 1.00 93.82 |
| C    |      |     |     |   |     |                |        |            |
| ATOM | 4142 | C   | LEU | X | 370 | 6.487-109.572  | 41.880 | 1.00103.92 |
| C    |      |     |     |   |     |                |        |            |
| ATOM | 4143 | O   | LEU | X | 370 | 5.650-110.335  | 42.380 | 1.00123.45 |
| O    |      |     |     |   |     |                |        |            |
| ATOM | 4144 | CB  | LEU | X | 370 | 8.610-109.268  | 43.121 | 1.00 90.25 |
| C    |      |     |     |   |     |                |        |            |
| ATOM | 4145 | CG  | LEU | X | 370 | 9.289-108.600  | 44.276 | 1.00 90.19 |
| C    |      |     |     |   |     |                |        |            |
| ATOM | 4146 | CD1 | LEU | X | 370 | 9.516-109.611  | 45.443 | 1.00 93.99 |
| C    |      |     |     |   |     |                |        |            |
| ATOM | 4147 | CD2 | LEU | X | 370 | 10.567-107.955 | 43.755 | 1.00 88.11 |
| C    |      |     |     |   |     |                |        |            |
| ATOM | 4148 | N   | ILE | X | 371 | 6.577-109.359  | 40.580 | 1.00102.06 |
| N    |      |     |     |   |     |                |        |            |

|      |      |     |     |   |     |                |        |      |        |
|------|------|-----|-----|---|-----|----------------|--------|------|--------|
| ATOM | 4149 | CA  | ILE | X | 371 | 5.900-110.188  | 39.606 | 1.00 | 99.38  |
| C    |      |     |     |   |     |                |        |      |        |
| ATOM | 4150 | C   | ILE | X | 371 | 6.922-110.689  | 38.618 | 1.00 | 97.23  |
| C    |      |     |     |   |     |                |        |      |        |
| ATOM | 4151 | O   | ILE | X | 371 | 7.799-109.922  | 38.184 | 1.00 | 100.70 |
| O    |      |     |     |   |     |                |        |      |        |
| ATOM | 4152 | CB  | ILE | X | 371 | 4.772-109.417  | 38.921 | 1.00 | 102.77 |
| C    |      |     |     |   |     |                |        |      |        |
| ATOM | 4153 | CG1 | ILE | X | 371 | 5.239-108.049  | 38.432 | 1.00 | 105.20 |
| C    |      |     |     |   |     |                |        |      |        |
| ATOM | 4154 | CG2 | ILE | X | 371 | 3.596-109.239  | 39.858 | 1.00 | 102.76 |
| C    |      |     |     |   |     |                |        |      |        |
| ATOM | 4155 | CD1 | ILE | X | 371 | 5.329-107.984  | 36.916 | 1.00 | 112.63 |
| C    |      |     |     |   |     |                |        |      |        |
| ATOM | 4156 | N   | GLY | X | 372 | 6.812-111.964  | 38.258 | 1.00 | 95.35  |
| N    |      |     |     |   |     |                |        |      |        |
| ATOM | 4157 | CA  | GLY | X | 372 | 7.765-112.563  | 37.308 | 1.00 | 97.44  |
| C    |      |     |     |   |     |                |        |      |        |
| ATOM | 4158 | C   | GLY | X | 372 | 9.082-112.909  | 37.995 | 1.00 | 99.28  |
| C    |      |     |     |   |     |                |        |      |        |
| ATOM | 4159 | O   | GLY | X | 372 | 9.191-112.840  | 39.234 | 1.00 | 98.34  |
| O    |      |     |     |   |     |                |        |      |        |
| ATOM | 4160 | N   | ARG | X | 373 | 10.086-113.254 | 37.190 | 1.00 | 102.69 |
| N    |      |     |     |   |     |                |        |      |        |
| ATOM | 4161 | CA  | ARG | X | 373 | 11.355-113.720 | 37.693 | 1.00 | 110.21 |
| C    |      |     |     |   |     |                |        |      |        |
| ATOM | 4162 | C   | ARG | X | 373 | 12.507-112.816 | 37.232 | 1.00 | 105.12 |
| C    |      |     |     |   |     |                |        |      |        |
| ATOM | 4163 | O   | ARG | X | 373 | 12.411-112.084 | 36.232 | 1.00 | 100.67 |
| O    |      |     |     |   |     |                |        |      |        |
| ATOM | 4164 | CB  | ARG | X | 373 | 11.559-115.204 | 37.314 | 1.00 | 129.58 |
| C    |      |     |     |   |     |                |        |      |        |
| ATOM | 4165 | CG  | ARG | X | 373 | 11.203-116.207 | 38.442 | 1.00 | 142.29 |
| C    |      |     |     |   |     |                |        |      |        |
| ATOM | 4166 | CD  | ARG | X | 373 | 10.185-117.293 | 38.024 | 1.00 | 150.99 |
| C    |      |     |     |   |     |                |        |      |        |
| ATOM | 4167 | NE  | ARG | X | 373 | 10.658-118.165 | 36.934 | 1.00 | 152.12 |
| N    |      |     |     |   |     |                |        |      |        |
| ATOM | 4168 | CZ  | ARG | X | 373 | 11.653-119.054 | 37.041 | 1.00 | 146.33 |
| C    |      |     |     |   |     |                |        |      |        |
| ATOM | 4169 | NH1 | ARG | X | 373 | 12.043-119.742 | 35.982 | 1.00 | 149.17 |
| N    |      |     |     |   |     |                |        |      |        |
| ATOM | 4170 | NH2 | ARG | X | 373 | 12.278-119.241 | 38.192 | 1.00 | 140.75 |
| N1+  |      |     |     |   |     |                |        |      |        |
| ATOM | 4171 | N   | PRO | X | 374 | 13.576-112.827 | 38.004 | 1.00 | 111.52 |
| N    |      |     |     |   |     |                |        |      |        |
| ATOM | 4172 | CA  | PRO | X | 374 | 14.704-111.931 | 37.739 | 1.00 | 117.13 |
| C    |      |     |     |   |     |                |        |      |        |
| ATOM | 4173 | C   | PRO | X | 374 | 15.234-112.117 | 36.317 | 1.00 | 111.39 |
| C    |      |     |     |   |     |                |        |      |        |
| ATOM | 4174 | O   | PRO | X | 374 | 15.441-113.236 | 35.874 | 1.00 | 114.94 |
| O    |      |     |     |   |     |                |        |      |        |
| ATOM | 4175 | CB  | PRO | X | 374 | 15.753-112.379 | 38.754 | 1.00 | 128.21 |
| C    |      |     |     |   |     |                |        |      |        |

|      |      |     |     |   |     |                |        |            |
|------|------|-----|-----|---|-----|----------------|--------|------------|
| ATOM | 4176 | CG  | PRO | X | 374 | 15.261-113.679 | 39.327 | 1.00132.53 |
| C    |      |     |     |   |     |                |        |            |
| ATOM | 4177 | CD  | PRO | X | 374 | 14.057-114.094 | 38.558 | 1.00122.40 |
| C    |      |     |     |   |     |                |        |            |
| ATOM | 4178 | N   | SER | X | 375 | 15.403-111.009 | 35.601 | 1.00104.80 |
| N    |      |     |     |   |     |                |        |            |
| ATOM | 4179 | CA  | SER | X | 375 | 15.885-110.979 | 34.229 | 1.00102.05 |
| C    |      |     |     |   |     |                |        |            |
| ATOM | 4180 | C   | SER | X | 375 | 16.980-109.939 | 34.054 | 1.00104.87 |
| C    |      |     |     |   |     |                |        |            |
| ATOM | 4181 | O   | SER | X | 375 | 16.908-108.813 | 34.529 | 1.00107.82 |
| O    |      |     |     |   |     |                |        |            |
| ATOM | 4182 | CB  | SER | X | 375 | 14.709-110.655 | 33.302 | 1.00 99.95 |
| C    |      |     |     |   |     |                |        |            |
| ATOM | 4183 | OG  | SER | X | 375 | 15.152-110.380 | 31.983 | 1.00100.99 |
| O    |      |     |     |   |     |                |        |            |
| ATOM | 4184 | N   | THR | X | 376 | 18.015-110.314 | 33.316 | 1.00111.05 |
| N    |      |     |     |   |     |                |        |            |
| ATOM | 4185 | CA  | THR | X | 376 | 19.151-109.450 | 32.966 | 1.00114.21 |
| C    |      |     |     |   |     |                |        |            |
| ATOM | 4186 | C   | THR | X | 376 | 18.863-108.659 | 31.680 | 1.00110.92 |
| C    |      |     |     |   |     |                |        |            |
| ATOM | 4187 | O   | THR | X | 376 | 19.725-107.929 | 31.183 | 1.00108.12 |
| O    |      |     |     |   |     |                |        |            |
| ATOM | 4188 | CB  | THR | X | 376 | 20.446-110.294 | 32.898 | 1.00117.69 |
| C    |      |     |     |   |     |                |        |            |
| ATOM | 4189 | OG1 | THR | X | 376 | 21.477-109.545 | 32.244 | 1.00121.25 |
| O    |      |     |     |   |     |                |        |            |
| ATOM | 4190 | CG2 | THR | X | 376 | 20.216-111.555 | 32.130 | 1.00117.15 |
| C    |      |     |     |   |     |                |        |            |
| ATOM | 4191 | N   | GLU | X | 377 | 17.688-108.831 | 31.066 | 1.00103.98 |
| N    |      |     |     |   |     |                |        |            |
| ATOM | 4192 | CA  | GLU | X | 377 | 17.373-108.229 | 29.776 | 1.00102.67 |
| C    |      |     |     |   |     |                |        |            |
| ATOM | 4193 | C   | GLU | X | 377 | 17.513-106.704 | 29.822 | 1.00102.05 |
| C    |      |     |     |   |     |                |        |            |
| ATOM | 4194 | O   | GLU | X | 377 | 16.686-106.020 | 30.419 | 1.00100.88 |
| O    |      |     |     |   |     |                |        |            |
| ATOM | 4195 | CB  | GLU | X | 377 | 15.961-108.624 | 29.327 | 1.00102.29 |
| C    |      |     |     |   |     |                |        |            |
| ATOM | 4196 | CG  | GLU | X | 377 | 15.771-108.221 | 27.860 | 1.00104.36 |
| C    |      |     |     |   |     |                |        |            |
| ATOM | 4197 | CD  | GLU | X | 377 | 14.321-107.975 | 27.455 | 1.00103.37 |
| C    |      |     |     |   |     |                |        |            |
| ATOM | 4198 | OE1 | GLU | X | 377 | 13.371-108.427 | 28.121 | 1.00 99.63 |
| O    |      |     |     |   |     |                |        |            |
| ATOM | 4199 | OE2 | GLU | X | 377 | 14.164-107.393 | 26.361 | 1.00102.89 |
| O1-  |      |     |     |   |     |                |        |            |
| ATOM | 4200 | N   | HIP | X | 378 | 18.530-106.167 | 29.132 | 1.00100.40 |
| N    |      |     |     |   |     |                |        |            |
| ATOM | 4201 | CA  | HIP | X | 378 | 18.724-104.720 | 28.993 | 1.00 92.60 |
| C    |      |     |     |   |     |                |        |            |
| ATOM | 4202 | C   | HIP | X | 378 | 18.834-104.006 | 30.364 | 1.00 89.79 |
| C    |      |     |     |   |     |                |        |            |

|      |      |     |     |   |     |                |        |      |       |
|------|------|-----|-----|---|-----|----------------|--------|------|-------|
| ATOM | 4203 | O   | HIP | X | 378 | 18.431-102.854 | 30.514 | 1.00 | 89.39 |
| O    |      |     |     |   |     |                |        |      |       |
| ATOM | 4204 | CB  | HIP | X | 378 | 17.614-104.235 | 28.040 | 1.00 | 88.80 |
| C    |      |     |     |   |     |                |        |      |       |
| ATOM | 4205 | CG  | HIP | X | 378 | 17.673-102.809 | 27.586 | 1.00 | 85.35 |
| C    |      |     |     |   |     |                |        |      |       |
| ATOM | 4206 | CD2 | HIP | X | 378 | 16.713-101.889 | 27.855 | 1.00 | 82.71 |
| C    |      |     |     |   |     |                |        |      |       |
| ATOM | 4207 | ND1 | HIP | X | 378 | 18.658-102.183 | 26.854 | 1.00 | 86.19 |
| N1+  |      |     |     |   |     |                |        |      |       |
| ATOM | 4208 | NE2 | HIP | X | 378 | 17.099-100.697 | 27.281 | 1.00 | 83.58 |
| N    |      |     |     |   |     |                |        |      |       |
| ATOM | 4209 | CE1 | HIP | X | 378 | 18.274-100.905 | 26.660 | 1.00 | 86.09 |
| C    |      |     |     |   |     |                |        |      |       |
| ATOM | 4210 | N   | SER | X | 379 | 19.379-104.716 | 31.361 | 1.00 | 87.50 |
| N    |      |     |     |   |     |                |        |      |       |
| ATOM | 4211 | CA  | SER | X | 379 | 19.617-104.212 | 32.718 | 1.00 | 86.06 |
| C    |      |     |     |   |     |                |        |      |       |
| ATOM | 4212 | C   | SER | X | 379 | 20.568-103.014 | 32.709 | 1.00 | 85.26 |
| C    |      |     |     |   |     |                |        |      |       |
| ATOM | 4213 | O   | SER | X | 379 | 21.606-103.055 | 32.049 | 1.00 | 84.47 |
| O    |      |     |     |   |     |                |        |      |       |
| ATOM | 4214 | CB  | SER | X | 379 | 20.199-105.322 | 33.598 | 1.00 | 87.67 |
| C    |      |     |     |   |     |                |        |      |       |
| ATOM | 4215 | OG  | SER | X | 379 | 20.327-104.890 | 34.936 | 1.00 | 87.52 |
| O    |      |     |     |   |     |                |        |      |       |
| ATOM | 4216 | N   | TRP | X | 380 | 20.238-101.965 | 33.462 | 1.00 | 84.44 |
| N    |      |     |     |   |     |                |        |      |       |
| ATOM | 4217 | CA  | TRP | X | 380 | 21.062-100.753 | 33.579 | 1.00 | 85.06 |
| C    |      |     |     |   |     |                |        |      |       |
| ATOM | 4218 | C   | TRP | X | 380 | 22.289-100.936 | 34.479 | 1.00 | 86.26 |
| C    |      |     |     |   |     |                |        |      |       |
| ATOM | 4219 | O   | TRP | X | 380 | 23.227-100.141 | 34.432 | 1.00 | 85.21 |
| O    |      |     |     |   |     |                |        |      |       |
| ATOM | 4220 | CB  | TRP | X | 380 | 20.179 -99.611 | 34.087 | 1.00 | 84.80 |
| C    |      |     |     |   |     |                |        |      |       |
| ATOM | 4221 | CG  | TRP | X | 380 | 18.964 -99.330 | 33.257 | 1.00 | 83.11 |
| C    |      |     |     |   |     |                |        |      |       |
| ATOM | 4222 | CD1 | TRP | X | 380 | 18.908 -99.369 | 31.908 | 1.00 | 83.46 |
| C    |      |     |     |   |     |                |        |      |       |
| ATOM | 4223 | CD2 | TRP | X | 380 | 17.618 -98.984 | 33.697 | 1.00 | 83.19 |
| C    |      |     |     |   |     |                |        |      |       |
| ATOM | 4224 | NE1 | TRP | X | 380 | 17.650 -99.009 | 31.477 | 1.00 | 84.70 |
| N    |      |     |     |   |     |                |        |      |       |
| ATOM | 4225 | CE2 | TRP | X | 380 | 16.808 -98.772 | 32.541 | 1.00 | 83.07 |
| C    |      |     |     |   |     |                |        |      |       |
| ATOM | 4226 | CE3 | TRP | X | 380 | 16.998 -98.842 | 34.956 | 1.00 | 84.88 |
| C    |      |     |     |   |     |                |        |      |       |
| ATOM | 4227 | CZ2 | TRP | X | 380 | 15.452 -98.437 | 32.628 | 1.00 | 83.44 |
| C    |      |     |     |   |     |                |        |      |       |
| ATOM | 4228 | CZ3 | TRP | X | 380 | 15.630 -98.527 | 35.056 | 1.00 | 83.62 |
| C    |      |     |     |   |     |                |        |      |       |
| ATOM | 4229 | CH2 | TRP | X | 380 | 14.859 -98.334 | 33.896 | 1.00 | 82.64 |
| C    |      |     |     |   |     |                |        |      |       |



|      |      |     |     |   |     |                |        |      |        |
|------|------|-----|-----|---|-----|----------------|--------|------|--------|
| ATOM | 4230 | N   | PHE | X | 381 | 22.301-102.012 | 35.265 | 1.00 | 89.69  |
| N    |      |     |     |   |     |                |        |      |        |
| ATOM | 4231 | CA  | PHE | X | 381 | 23.379-102.367 | 36.176 | 1.00 | 98.94  |
| C    |      |     |     |   |     |                |        |      |        |
| ATOM | 4232 | C   | PHE | X | 381 | 23.985-103.685 | 35.693 | 1.00 | 111.09 |
| C    |      |     |     |   |     |                |        |      |        |
| ATOM | 4233 | O   | PHE | X | 381 | 23.392-104.744 | 35.931 | 1.00 | 119.86 |
| O    |      |     |     |   |     |                |        |      |        |
| ATOM | 4234 | CB  | PHE | X | 381 | 22.825-102.435 | 37.604 | 1.00 | 99.99  |
| C    |      |     |     |   |     |                |        |      |        |
| ATOM | 4235 | CG  | PHE | X | 381 | 22.155-101.142 | 38.000 | 1.00 | 94.75  |
| C    |      |     |     |   |     |                |        |      |        |
| ATOM | 4236 | CD1 | PHE | X | 381 | 22.936-100.001 | 38.213 | 1.00 | 93.89  |
| C    |      |     |     |   |     |                |        |      |        |
| ATOM | 4237 | CD2 | PHE | X | 381 | 20.754-101.039 | 37.998 | 1.00 | 91.15  |
| C    |      |     |     |   |     |                |        |      |        |
| ATOM | 4238 | CE1 | PHE | X | 381 | 22.313 -98.762 | 38.399 | 1.00 | 90.96  |
| C    |      |     |     |   |     |                |        |      |        |
| ATOM | 4239 | CE2 | PHE | X | 381 | 20.127 -99.805 | 38.234 | 1.00 | 90.77  |
| C    |      |     |     |   |     |                |        |      |        |
| ATOM | 4240 | CZ  | PHE | X | 381 | 20.911 -98.655 | 38.425 | 1.00 | 91.21  |
| C    |      |     |     |   |     |                |        |      |        |
| ATOM | 4241 | N   | PRO | X | 382 | 25.139-103.659 | 34.996 | 1.00 | 118.05 |
| N    |      |     |     |   |     |                |        |      |        |
| ATOM | 4242 | CA  | PRO | X | 382 | 25.749-104.914 | 34.547 | 1.00 | 123.82 |
| C    |      |     |     |   |     |                |        |      |        |
| ATOM | 4243 | C   | PRO | X | 382 | 26.114-105.681 | 35.828 | 1.00 | 128.93 |
| C    |      |     |     |   |     |                |        |      |        |
| ATOM | 4244 | O   | PRO | X | 382 | 26.736-105.120 | 36.756 | 1.00 | 127.22 |
| O    |      |     |     |   |     |                |        |      |        |
| ATOM | 4245 | CB  | PRO | X | 382 | 26.980-104.476 | 33.758 | 1.00 | 123.41 |
| C    |      |     |     |   |     |                |        |      |        |
| ATOM | 4246 | CG  | PRO | X | 382 | 27.340-103.129 | 34.346 | 1.00 | 122.27 |
| C    |      |     |     |   |     |                |        |      |        |
| ATOM | 4247 | CD  | PRO | X | 382 | 26.099-102.542 | 34.958 | 1.00 | 116.47 |
| C    |      |     |     |   |     |                |        |      |        |
| ATOM | 4248 | N   | GLY | X | 383 | 25.657-106.926 | 35.898 | 1.00 | 127.49 |
| N    |      |     |     |   |     |                |        |      |        |
| ATOM | 4249 | CA  | GLY | X | 383 | 25.856-107.752 | 37.073 | 1.00 | 122.80 |
| C    |      |     |     |   |     |                |        |      |        |
| ATOM | 4250 | C   | GLY | X | 383 | 24.545-108.106 | 37.734 | 1.00 | 115.01 |
| C    |      |     |     |   |     |                |        |      |        |
| ATOM | 4251 | O   | GLY | X | 383 | 24.471-109.113 | 38.447 | 1.00 | 125.98 |
| O    |      |     |     |   |     |                |        |      |        |
| ATOM | 4252 | N   | TYR | X | 384 | 23.525-107.277 | 37.494 | 1.00 | 102.04 |
| N    |      |     |     |   |     |                |        |      |        |
| ATOM | 4253 | CA  | TYR | X | 384 | 22.229-107.441 | 38.130 | 1.00 | 98.24  |
| C    |      |     |     |   |     |                |        |      |        |
| ATOM | 4254 | C   | TYR | X | 384 | 21.127-107.816 | 37.153 | 1.00 | 95.03  |
| C    |      |     |     |   |     |                |        |      |        |
| ATOM | 4255 | O   | TYR | X | 384 | 21.089-107.339 | 36.015 | 1.00 | 96.99  |
| O    |      |     |     |   |     |                |        |      |        |
| ATOM | 4256 | CB  | TYR | X | 384 | 21.833-106.167 | 38.882 | 1.00 | 99.37  |
| C    |      |     |     |   |     |                |        |      |        |

|      |      |     |     |   |     |                |        |            |
|------|------|-----|-----|---|-----|----------------|--------|------------|
| ATOM | 4257 | CG  | TYR | X | 384 | 22.722-105.900 | 40.067 | 1.00103.27 |
| C    |      |     |     |   |     |                |        |            |
| ATOM | 4258 | CD1 | TYR | X | 384 | 23.974-105.336 | 39.911 | 1.00104.96 |
| C    |      |     |     |   |     |                |        |            |
| ATOM | 4259 | CD2 | TYR | X | 384 | 22.375-106.417 | 41.328 | 1.00101.96 |
| C    |      |     |     |   |     |                |        |            |
| ATOM | 4260 | CE1 | TYR | X | 384 | 24.832-105.226 | 40.977 | 1.00105.96 |
| C    |      |     |     |   |     |                |        |            |
| ATOM | 4261 | CE2 | TYR | X | 384 | 23.240-106.332 | 42.389 | 1.00100.64 |
| C    |      |     |     |   |     |                |        |            |
| ATOM | 4262 | CZ  | TYR | X | 384 | 24.464-105.738 | 42.199 | 1.00103.62 |
| C    |      |     |     |   |     |                |        |            |
| ATOM | 4263 | OH  | TYR | X | 384 | 25.320-105.561 | 43.230 | 1.00110.69 |
| O    |      |     |     |   |     |                |        |            |
| ATOM | 4264 | N   | ALA | X | 385 | 20.141-108.540 | 37.672 | 1.00 92.43 |
| N    |      |     |     |   |     |                |        |            |
| ATOM | 4265 | CA  | ALA | X | 385 | 18.865-108.747 | 37.020 | 1.00 93.05 |
| C    |      |     |     |   |     |                |        |            |
| ATOM | 4266 | C   | ALA | X | 385 | 17.787-107.913 | 37.702 | 1.00 86.22 |
| C    |      |     |     |   |     |                |        |            |
| ATOM | 4267 | O   | ALA | X | 385 | 17.811-107.760 | 38.920 | 1.00 80.82 |
| O    |      |     |     |   |     |                |        |            |
| ATOM | 4268 | CB  | ALA | X | 385 | 18.567-110.233 | 37.074 | 1.00101.24 |
| C    |      |     |     |   |     |                |        |            |
| ATOM | 4269 | N   | TRP | X | 386 | 16.839-107.394 | 36.932 | 1.00 86.40 |
| N    |      |     |     |   |     |                |        |            |
| ATOM | 4270 | CA  | TRP | X | 386 | 15.663-106.689 | 37.423 | 1.00 87.18 |
| C    |      |     |     |   |     |                |        |            |
| ATOM | 4271 | C   | TRP | X | 386 | 14.485-107.655 | 37.573 | 1.00 87.17 |
| C    |      |     |     |   |     |                |        |            |
| ATOM | 4272 | O   | TRP | X | 386 | 14.342-108.617 | 36.823 | 1.00101.57 |
| O    |      |     |     |   |     |                |        |            |
| ATOM | 4273 | CB  | TRP | X | 386 | 15.328-105.537 | 36.467 | 1.00 88.49 |
| C    |      |     |     |   |     |                |        |            |
| ATOM | 4274 | CG  | TRP | X | 386 | 15.072-105.940 | 35.045 | 1.00 87.62 |
| C    |      |     |     |   |     |                |        |            |
| ATOM | 4275 | CD1 | TRP | X | 386 | 15.994-105.921 | 34.057 | 1.00 86.91 |
| C    |      |     |     |   |     |                |        |            |
| ATOM | 4276 | CD2 | TRP | X | 386 | 13.839-106.438 | 34.429 | 1.00 87.01 |
| C    |      |     |     |   |     |                |        |            |
| ATOM | 4277 | NE1 | TRP | X | 386 | 15.428-106.388 | 32.888 | 1.00 88.36 |
| N    |      |     |     |   |     |                |        |            |
| ATOM | 4278 | CE2 | TRP | X | 386 | 14.111-106.747 | 33.062 | 1.00 88.12 |
| C    |      |     |     |   |     |                |        |            |
| ATOM | 4279 | CE3 | TRP | X | 386 | 12.516-106.649 | 34.876 | 1.00 88.28 |
| C    |      |     |     |   |     |                |        |            |
| ATOM | 4280 | CZ2 | TRP | X | 386 | 13.131-107.242 | 32.187 | 1.00 90.14 |
| C    |      |     |     |   |     |                |        |            |
| ATOM | 4281 | CZ3 | TRP | X | 386 | 11.517-107.126 | 34.003 | 1.00 89.44 |
| C    |      |     |     |   |     |                |        |            |
| ATOM | 4282 | CH2 | TRP | X | 386 | 11.821-107.420 | 32.663 | 1.00 89.64 |
| C    |      |     |     |   |     |                |        |            |
| ATOM | 4283 | N   | THR | X | 387 | 13.584-107.329 | 38.491 | 1.00 81.47 |
| N    |      |     |     |   |     |                |        |            |

|      |      |     |     |   |     |                |        |      |        |
|------|------|-----|-----|---|-----|----------------|--------|------|--------|
| ATOM | 4284 | CA  | THR | X | 387 | 12.251-107.931 | 38.619 | 1.00 | 80.87  |
| C    |      |     |     |   |     |                |        |      |        |
| ATOM | 4285 | C   | THR | X | 387 | 11.267-106.790 | 38.853 | 1.00 | 78.19  |
| C    |      |     |     |   |     |                |        |      |        |
| ATOM | 4286 | O   | THR | X | 387 | 11.571-105.912 | 39.664 | 1.00 | 77.72  |
| O    |      |     |     |   |     |                |        |      |        |
| ATOM | 4287 | CB  | THR | X | 387 | 12.181-108.934 | 39.787 | 1.00 | 83.47  |
| C    |      |     |     |   |     |                |        |      |        |
| ATOM | 4288 | OG1 | THR | X | 387 | 13.439-109.485 | 40.119 | 1.00 | 87.11  |
| O    |      |     |     |   |     |                |        |      |        |
| ATOM | 4289 | CG2 | THR | X | 387 | 11.266-110.100 | 39.442 | 1.00 | 84.13  |
| C    |      |     |     |   |     |                |        |      |        |
| ATOM | 4290 | N   | VAL | X | 388 | 10.146-106.716 | 38.124 | 1.00 | 78.44  |
| N    |      |     |     |   |     |                |        |      |        |
| ATOM | 4291 | CA  | VAL | X | 388 | 9.197-105.596  | 38.290 | 1.00 | 80.00  |
| C    |      |     |     |   |     |                |        |      |        |
| ATOM | 4292 | C   | VAL | X | 388 | 8.637-105.588  | 39.700 | 1.00 | 81.96  |
| C    |      |     |     |   |     |                |        |      |        |
| ATOM | 4293 | O   | VAL | X | 388 | 8.116-106.598  | 40.165 | 1.00 | 85.99  |
| O    |      |     |     |   |     |                |        |      |        |
| ATOM | 4294 | CB  | VAL | X | 388 | 8.041-105.606  | 37.268 | 1.00 | 80.34  |
| C    |      |     |     |   |     |                |        |      |        |
| ATOM | 4295 | CG1 | VAL | X | 388 | 6.766-104.906  | 37.788 | 1.00 | 80.21  |
| C    |      |     |     |   |     |                |        |      |        |
| ATOM | 4296 | CG2 | VAL | X | 388 | 8.501-104.894  | 35.994 | 1.00 | 80.57  |
| C    |      |     |     |   |     |                |        |      |        |
| ATOM | 4297 | N   | ALA | X | 389 | 8.630-104.394  | 40.282 | 1.00 | 79.83  |
| N    |      |     |     |   |     |                |        |      |        |
| ATOM | 4298 | CA  | ALA | X | 389 | 8.104-104.059  | 41.591 | 1.00 | 78.65  |
| C    |      |     |     |   |     |                |        |      |        |
| ATOM | 4299 | C   | ALA | X | 389 | 6.865-103.242  | 41.481 | 1.00 | 79.15  |
| C    |      |     |     |   |     |                |        |      |        |
| ATOM | 4300 | O   | ALA | X | 389 | 6.957-102.278  | 40.812 | 1.00 | 74.51  |
| O    |      |     |     |   |     |                |        |      |        |
| ATOM | 4301 | CB  | ALA | X | 389 | 9.189-103.209  | 42.219 | 1.00 | 77.38  |
| C    |      |     |     |   |     |                |        |      |        |
| ATOM | 4302 | N   | GLN | X | 390 | 5.766-103.567  | 42.175 | 1.00 | 87.86  |
| N    |      |     |     |   |     |                |        |      |        |
| ATOM | 4303 | CA  | GLN | X | 390 | 4.663-102.607  | 42.267 | 1.00 | 97.52  |
| C    |      |     |     |   |     |                |        |      |        |
| ATOM | 4304 | C   | GLN | X | 390 | 3.997-102.453  | 43.624 | 1.00 | 105.98 |
| C    |      |     |     |   |     |                |        |      |        |
| ATOM | 4305 | O   | GLN | X | 390 | 4.012-103.356  | 44.426 | 1.00 | 116.13 |
| O    |      |     |     |   |     |                |        |      |        |
| ATOM | 4306 | CB  | GLN | X | 390 | 3.595-102.875  | 41.226 | 1.00 | 97.70  |
| C    |      |     |     |   |     |                |        |      |        |
| ATOM | 4307 | CG  | GLN | X | 390 | 2.779-104.123  | 41.510 | 1.00 | 97.84  |
| C    |      |     |     |   |     |                |        |      |        |
| ATOM | 4308 | CD  | GLN | X | 390 | 2.800-105.044  | 40.328 | 1.00 | 101.36 |
| C    |      |     |     |   |     |                |        |      |        |
| ATOM | 4309 | OE1 | GLN | X | 390 | 3.760-105.791  | 40.145 | 1.00 | 99.35  |
| O    |      |     |     |   |     |                |        |      |        |
| ATOM | 4310 | NE2 | GLN | X | 390 | 1.873-104.824  | 39.392 | 1.00 | 106.07 |
| N    |      |     |     |   |     |                |        |      |        |

|      |      |     |           |                |        |            |
|------|------|-----|-----------|----------------|--------|------------|
| ATOM | 4311 | N   | CYM X 391 | 3.396-101.300  | 43.867 | 1.00108.10 |
| N    |      |     |           |                |        |            |
| ATOM | 4312 | CA  | CYM X 391 | 2.773-100.926  | 45.152 | 1.00114.78 |
| C    |      |     |           |                |        |            |
| ATOM | 4313 | C   | CYM X 391 | 1.783-101.992  | 45.580 | 1.00117.17 |
| C    |      |     |           |                |        |            |
| ATOM | 4314 | O   | CYM X 391 | 0.731-102.195  | 44.917 | 1.00114.58 |
| O    |      |     |           |                |        |            |
| ATOM | 4315 | CB  | CYM X 391 | 2.028 -99.564  | 45.043 | 1.00117.22 |
| C    |      |     |           |                |        |            |
| ATOM | 4316 | SG  | CYM X 391 | 1.525 -98.736  | 46.612 | 1.00121.67 |
| S1-  |      |     |           |                |        |            |
| ATOM | 4317 | N   | LYS X 392 | 2.120-102.650  | 46.657 | 1.00116.41 |
| N    |      |     |           |                |        |            |
| ATOM | 4318 | CA  | LYS X 392 | 1.221-103.541  | 47.375 | 1.00113.64 |
| C    |      |     |           |                |        |            |
| ATOM | 4319 | C   | LYS X 392 | -0.255-103.068 | 47.389 | 1.00119.18 |
| C    |      |     |           |                |        |            |
| ATOM | 4320 | O   | LYS X 392 | -1.165-103.865 | 47.198 | 1.00133.28 |
| O    |      |     |           |                |        |            |
| ATOM | 4321 | CB  | LYS X 392 | 1.705-103.694  | 48.857 | 1.00 0.00  |
| C    |      |     |           |                |        |            |
| ATOM | 4322 | CG  | LYS X 392 | 0.910-104.724  | 49.681 | 1.00 0.00  |
| C    |      |     |           |                |        |            |
| ATOM | 4323 | CD  | LYS X 392 | 1.563-105.073  | 51.026 | 1.00 0.00  |
| C    |      |     |           |                |        |            |
| ATOM | 4324 | CE  | LYS X 392 | 2.803-105.961  | 50.860 | 1.00 0.00  |
| C    |      |     |           |                |        |            |
| ATOM | 4325 | NZ  | LYS X 392 | 3.355-106.357  | 52.166 | 1.00 0.00  |
| N1+  |      |     |           |                |        |            |
| ATOM | 4326 | N   | ILE X 393 | -0.477-101.777 | 47.605 | 1.00117.95 |
| N    |      |     |           |                |        |            |
| ATOM | 4327 | CA  | ILE X 393 | -1.827-101.223 | 47.761 | 1.00112.90 |
| C    |      |     |           |                |        |            |
| ATOM | 4328 | C   | ILE X 393 | -2.480-100.982 | 46.370 | 1.00107.36 |
| C    |      |     |           |                |        |            |
| ATOM | 4329 | O   | ILE X 393 | -3.485-101.605 | 45.977 | 1.00 99.20 |
| O    |      |     |           |                |        |            |
| ATOM | 4330 | CB  | ILE X 393 | -1.827 -99.823 | 48.503 | 1.00111.20 |
| C    |      |     |           |                |        |            |
| ATOM | 4331 | CG1 | ILE X 393 | -0.597 -99.583 | 49.437 | 1.00107.54 |
| C    |      |     |           |                |        |            |
| ATOM | 4332 | CG2 | ILE X 393 | -3.145 -99.626 | 49.235 | 1.00115.50 |
| C    |      |     |           |                |        |            |
| ATOM | 4333 | CD1 | ILE X 393 | -0.670-100.227 | 50.822 | 1.00109.80 |
| C    |      |     |           |                |        |            |
| ATOM | 4334 | N   | CYM X 394 | -1.857-100.073 | 45.632 | 1.00101.75 |
| N    |      |     |           |                |        |            |
| ATOM | 4335 | CA  | CYM X 394 | -2.451 -99.500 | 44.428 | 1.00 99.02 |
| C    |      |     |           |                |        |            |
| ATOM | 4336 | C   | CYM X 394 | -2.036-100.183 | 43.117 | 1.00101.61 |
| C    |      |     |           |                |        |            |
| ATOM | 4337 | O   | CYM X 394 | -2.647 -99.919 | 42.057 | 1.00 93.31 |
| O    |      |     |           |                |        |            |

|      |      |     |     |   |     |        |          |        |      |        |
|------|------|-----|-----|---|-----|--------|----------|--------|------|--------|
| ATOM | 4338 | CB  | CYM | X | 394 | -2.155 | -98.017  | 44.376 | 1.00 | 92.75  |
| C    |      |     |     |   |     |        |          |        |      |        |
| ATOM | 4339 | SG  | CYM | X | 394 | -0.403 | -97.739  | 44.253 | 1.00 | 86.17  |
| S1-  |      |     |     |   |     |        |          |        |      |        |
| ATOM | 4340 | N   | ALA | X | 395 | -1.036 | -101.068 | 43.178 | 1.00 | 104.97 |
| N    |      |     |     |   |     |        |          |        |      |        |
| ATOM | 4341 | CA  | ALA | X | 395 | -0.606 | -101.871 | 42.022 | 1.00 | 102.08 |
| C    |      |     |     |   |     |        |          |        |      |        |
| ATOM | 4342 | C   | ALA | X | 395 | 0.207  | -101.048 | 41.058 | 1.00 | 99.60  |
| C    |      |     |     |   |     |        |          |        |      |        |
| ATOM | 4343 | O   | ALA | X | 395 | 0.717  | -101.566 | 40.046 | 1.00 | 101.62 |
| O    |      |     |     |   |     |        |          |        |      |        |
| ATOM | 4344 | CB  | ALA | X | 395 | -1.803 | -102.491 | 41.315 | 1.00 | 100.31 |
| C    |      |     |     |   |     |        |          |        |      |        |
| ATOM | 4345 | N   | SER | X | 396 | 0.298  | -99.747  | 41.334 | 1.00 | 99.62  |
| N    |      |     |     |   |     |        |          |        |      |        |
| ATOM | 4346 | CA  | SER | X | 396 | 0.991  | -98.833  | 40.433 | 1.00 | 102.44 |
| C    |      |     |     |   |     |        |          |        |      |        |
| ATOM | 4347 | C   | SER | X | 396 | 2.484  | -99.134  | 40.427 | 1.00 | 98.06  |
| C    |      |     |     |   |     |        |          |        |      |        |
| ATOM | 4348 | O   | SER | X | 396 | 3.124  | -99.205  | 41.480 | 1.00 | 96.22  |
| O    |      |     |     |   |     |        |          |        |      |        |
| ATOM | 4349 | CB  | SER | X | 396 | 0.704  | -97.329  | 40.758 | 1.00 | 106.51 |
| C    |      |     |     |   |     |        |          |        |      |        |
| ATOM | 4350 | OG  | SER | X | 396 | 1.476  | -96.827  | 41.845 | 1.00 | 105.75 |
| O    |      |     |     |   |     |        |          |        |      |        |
| ATOM | 4351 | N   | HIE | X | 397 | 3.023  | -99.356  | 39.234 | 1.00 | 93.90  |
| N    |      |     |     |   |     |        |          |        |      |        |
| ATOM | 4352 | CA  | HIE | X | 397 | 4.417  | -99.805  | 39.065 | 1.00 | 87.18  |
| C    |      |     |     |   |     |        |          |        |      |        |
| ATOM | 4353 | C   | HIE | X | 397 | 5.447  | -98.774  | 39.619 | 1.00 | 81.56  |
| C    |      |     |     |   |     |        |          |        |      |        |
| ATOM | 4354 | O   | HIE | X | 397 | 5.677  | -97.703  | 39.052 | 1.00 | 80.34  |
| O    |      |     |     |   |     |        |          |        |      |        |
| ATOM | 4355 | CB  | HIE | X | 397 | 4.742  | -100.261 | 37.568 | 1.00 | 84.78  |
| C    |      |     |     |   |     |        |          |        |      |        |
| ATOM | 4356 | CG  | HIE | X | 397 | 6.197  | -100.113 | 37.167 | 1.00 | 80.64  |
| C    |      |     |     |   |     |        |          |        |      |        |
| ATOM | 4357 | ND1 | HIE | X | 397 | 6.770  | -99.153  | 36.318 | 1.00 | 78.02  |
| N    |      |     |     |   |     |        |          |        |      |        |
| ATOM | 4358 | CD2 | HIE | X | 397 | 7.187  | -100.927 | 37.627 | 1.00 | 79.51  |
| C    |      |     |     |   |     |        |          |        |      |        |
| ATOM | 4359 | CE1 | HIE | X | 397 | 8.085  | -99.427  | 36.298 | 1.00 | 76.44  |
| C    |      |     |     |   |     |        |          |        |      |        |
| ATOM | 4360 | NE2 | HIE | X | 397 | 8.359  | -100.496 | 37.060 | 1.00 | 76.75  |
| N    |      |     |     |   |     |        |          |        |      |        |
| ATOM | 4361 | N   | ILE | X | 398 | 6.080  | -99.160  | 40.703 | 1.00 | 78.72  |
| N    |      |     |     |   |     |        |          |        |      |        |
| ATOM | 4362 | CA  | ILE | X | 398 | 6.967  | -98.264  | 41.463 | 1.00 | 82.80  |
| C    |      |     |     |   |     |        |          |        |      |        |
| ATOM | 4363 | C   | ILE | X | 398 | 8.434  | -98.316  | 41.013 | 1.00 | 79.36  |
| C    |      |     |     |   |     |        |          |        |      |        |
| ATOM | 4364 | O   | ILE | X | 398 | 9.184  | -97.416  | 41.285 | 1.00 | 76.57  |
| O    |      |     |     |   |     |        |          |        |      |        |

|      |      |     |     |   |     |        |          |        |      |        |
|------|------|-----|-----|---|-----|--------|----------|--------|------|--------|
| ATOM | 4365 | CB  | ILE | X | 398 | 6.974  | -98.627  | 42.969 | 1.00 | 92.69  |
| C    |      |     |     |   |     |        |          |        |      |        |
| ATOM | 4366 | CG1 | ILE | X | 398 | 5.562  | -98.568  | 43.520 | 1.00 | 100.53 |
| C    |      |     |     |   |     |        |          |        |      |        |
| ATOM | 4367 | CG2 | ILE | X | 398 | 7.901  | -97.698  | 43.815 | 1.00 | 92.07  |
| C    |      |     |     |   |     |        |          |        |      |        |
| ATOM | 4368 | CD1 | ILE | X | 398 | 5.082  | -97.149  | 43.783 | 1.00 | 103.36 |
| C    |      |     |     |   |     |        |          |        |      |        |
| ATOM | 4369 | N   | GLY | X | 399 | 8.835  | -99.412  | 40.395 | 1.00 | 76.86  |
| N    |      |     |     |   |     |        |          |        |      |        |
| ATOM | 4370 | CA  | GLY | X | 399 | 10.213 | -99.584  | 39.929 | 1.00 | 76.55  |
| C    |      |     |     |   |     |        |          |        |      |        |
| ATOM | 4371 | C   | GLY | X | 399 | 10.584 | -101.042 | 39.702 | 1.00 | 76.55  |
| C    |      |     |     |   |     |        |          |        |      |        |
| ATOM | 4372 | O   | GLY | X | 399 | 9.801  | -101.815 | 39.150 | 1.00 | 75.44  |
| O    |      |     |     |   |     |        |          |        |      |        |
| ATOM | 4373 | N   | TRP | X | 400 | 11.775 | -101.434 | 40.152 | 1.00 | 78.15  |
| N    |      |     |     |   |     |        |          |        |      |        |
| ATOM | 4374 | CA  | TRP | X | 400 | 12.252 | -102.812 | 40.064 | 1.00 | 80.47  |
| C    |      |     |     |   |     |        |          |        |      |        |
| ATOM | 4375 | C   | TRP | X | 400 | 13.092 | -103.184 | 41.279 | 1.00 | 81.08  |
| C    |      |     |     |   |     |        |          |        |      |        |
| ATOM | 4376 | O   | TRP | X | 400 | 13.730 | -102.342 | 41.913 | 1.00 | 84.61  |
| O    |      |     |     |   |     |        |          |        |      |        |
| ATOM | 4377 | CB  | TRP | X | 400 | 13.059 | -103.041 | 38.779 | 1.00 | 82.76  |
| C    |      |     |     |   |     |        |          |        |      |        |
| ATOM | 4378 | CG  | TRP | X | 400 | 12.407 | -102.576 | 37.522 | 1.00 | 83.96  |
| C    |      |     |     |   |     |        |          |        |      |        |
| ATOM | 4379 | CD1 | TRP | X | 400 | 11.714 | -103.338 | 36.649 | 1.00 | 84.38  |
| C    |      |     |     |   |     |        |          |        |      |        |
| ATOM | 4380 | CD2 | TRP | X | 400 | 12.337 | -101.212 | 37.011 | 1.00 | 83.59  |
| C    |      |     |     |   |     |        |          |        |      |        |
| ATOM | 4381 | NE1 | TRP | X | 400 | 11.211 | -102.537 | 35.646 | 1.00 | 84.40  |
| N    |      |     |     |   |     |        |          |        |      |        |
| ATOM | 4382 | CE2 | TRP | X | 400 | 11.574 | -101.223 | 35.810 | 1.00 | 84.28  |
| C    |      |     |     |   |     |        |          |        |      |        |
| ATOM | 4383 | CE3 | TRP | X | 400 | 12.822 | -99.965  | 37.462 | 1.00 | 84.78  |
| C    |      |     |     |   |     |        |          |        |      |        |
| ATOM | 4384 | CZ2 | TRP | X | 400 | 11.332 | -100.064 | 35.066 | 1.00 | 87.12  |
| C    |      |     |     |   |     |        |          |        |      |        |
| ATOM | 4385 | CZ3 | TRP | X | 400 | 12.533 | -98.783  | 36.760 | 1.00 | 84.56  |
| C    |      |     |     |   |     |        |          |        |      |        |
| ATOM | 4386 | CH2 | TRP | X | 400 | 11.801 | -98.840  | 35.564 | 1.00 | 85.66  |
| C    |      |     |     |   |     |        |          |        |      |        |
| ATOM | 4387 | N   | LYS | X | 401 | 13.148 | -104.483 | 41.549 | 1.00 | 80.31  |
| N    |      |     |     |   |     |        |          |        |      |        |
| ATOM | 4388 | CA  | LYS | X | 401 | 14.065 | -105.090 | 42.508 | 1.00 | 81.95  |
| C    |      |     |     |   |     |        |          |        |      |        |
| ATOM | 4389 | C   | LYS | X | 401 | 15.209 | -105.735 | 41.740 | 1.00 | 80.60  |
| C    |      |     |     |   |     |        |          |        |      |        |
| ATOM | 4390 | O   | LYS | X | 401 | 14.964 | -106.529 | 40.833 | 1.00 | 82.42  |
| O    |      |     |     |   |     |        |          |        |      |        |
| ATOM | 4391 | CB  | LYS | X | 401 | 13.291 | -106.103 | 43.354 | 1.00 | 87.16  |
| C    |      |     |     |   |     |        |          |        |      |        |

|      |      |     |     |   |     |                |        |      |        |
|------|------|-----|-----|---|-----|----------------|--------|------|--------|
| ATOM | 4392 | CG  | LYS | X | 401 | 13.594-105.997 | 44.829 | 1.00 | 94.67  |
| C    |      |     |     |   |     |                |        |      |        |
| ATOM | 4393 | CD  | LYS | X | 401 | 13.472-107.338 | 45.521 | 1.00 | 103.59 |
| C    |      |     |     |   |     |                |        |      |        |
| ATOM | 4394 | CE  | LYS | X | 401 | 14.836-107.921 | 45.874 | 1.00 | 114.64 |
| C    |      |     |     |   |     |                |        |      |        |
| ATOM | 4395 | NZ  | LYS | X | 401 | 14.749-109.391 | 46.090 | 1.00 | 124.56 |
| N1+  |      |     |     |   |     |                |        |      |        |
| ATOM | 4396 | N   | PHE | X | 402 | 16.437-105.413 | 42.110 | 1.00 | 79.55  |
| N    |      |     |     |   |     |                |        |      |        |
| ATOM | 4397 | CA  | PHE | X | 402 | 17.645-105.845 | 41.426 | 1.00 | 80.94  |
| C    |      |     |     |   |     |                |        |      |        |
| ATOM | 4398 | C   | PHE | X | 402 | 18.360-106.929 | 42.227 | 1.00 | 86.92  |
| C    |      |     |     |   |     |                |        |      |        |
| ATOM | 4399 | O   | PHE | X | 402 | 18.580-106.737 | 43.396 | 1.00 | 98.06  |
| O    |      |     |     |   |     |                |        |      |        |
| ATOM | 4400 | CB  | PHE | X | 402 | 18.552-104.648 | 41.152 | 1.00 | 77.27  |
| C    |      |     |     |   |     |                |        |      |        |
| ATOM | 4401 | CG  | PHE | X | 402 | 17.979-103.687 | 40.132 | 1.00 | 73.70  |
| C    |      |     |     |   |     |                |        |      |        |
| ATOM | 4402 | CD1 | PHE | X | 402 | 16.985-102.766 | 40.508 | 1.00 | 72.26  |
| C    |      |     |     |   |     |                |        |      |        |
| ATOM | 4403 | CD2 | PHE | X | 402 | 18.409-103.740 | 38.795 | 1.00 | 72.58  |
| C    |      |     |     |   |     |                |        |      |        |
| ATOM | 4404 | CE1 | PHE | X | 402 | 16.419-101.907 | 39.552 | 1.00 | 71.11  |
| C    |      |     |     |   |     |                |        |      |        |
| ATOM | 4405 | CE2 | PHE | X | 402 | 17.855-102.864 | 37.846 | 1.00 | 71.91  |
| C    |      |     |     |   |     |                |        |      |        |
| ATOM | 4406 | CZ  | PHE | X | 402 | 16.861-101.948 | 38.221 | 1.00 | 70.96  |
| C    |      |     |     |   |     |                |        |      |        |
| ATOM | 4407 | N   | THR | X | 403 | 18.814-107.929 | 41.558 | 1.00 | 91.13  |
| N    |      |     |     |   |     |                |        |      |        |
| ATOM | 4408 | CA  | THR | X | 403 | 19.274-109.130 | 42.170 | 1.00 | 95.39  |
| C    |      |     |     |   |     |                |        |      |        |
| ATOM | 4409 | C   | THR | X | 403 | 20.608-109.509 | 41.487 | 1.00 | 102.54 |
| C    |      |     |     |   |     |                |        |      |        |
| ATOM | 4410 | O   | THR | X | 403 | 20.794-109.243 | 40.310 | 1.00 | 102.03 |
| O    |      |     |     |   |     |                |        |      |        |
| ATOM | 4411 | CB  | THR | X | 403 | 18.101-110.091 | 41.977 | 1.00 | 93.20  |
| C    |      |     |     |   |     |                |        |      |        |
| ATOM | 4412 | OG1 | THR | X | 403 | 17.514-109.840 | 40.692 | 1.00 | 90.72  |
| O    |      |     |     |   |     |                |        |      |        |
| ATOM | 4413 | CG2 | THR | X | 403 | 17.009-109.772 | 43.012 | 1.00 | 90.89  |
| C    |      |     |     |   |     |                |        |      |        |
| ATOM | 4414 | N   | ALA | X | 404 | 21.583-110.004 | 42.266 | 1.00 | 108.68 |
| N    |      |     |     |   |     |                |        |      |        |
| ATOM | 4415 | CA  | ALA | X | 404 | 22.862-110.381 | 41.696 | 1.00 | 116.04 |
| C    |      |     |     |   |     |                |        |      |        |
| ATOM | 4416 | C   | ALA | X | 404 | 22.780-111.689 | 40.933 | 1.00 | 118.61 |
| C    |      |     |     |   |     |                |        |      |        |
| ATOM | 4417 | O   | ALA | X | 404 | 21.895-112.505 | 41.178 | 1.00 | 118.83 |
| O    |      |     |     |   |     |                |        |      |        |
| ATOM | 4418 | CB  | ALA | X | 404 | 23.928-110.452 | 42.755 | 1.00 | 125.14 |
| C    |      |     |     |   |     |                |        |      |        |

|      |      |     |     |   |     |                |        |            |
|------|------|-----|-----|---|-----|----------------|--------|------------|
| ATOM | 4419 | N   | THR | X | 405 | 23.652-111.844 | 39.944 | 1.00128.07 |
| N    |      |     |     |   |     |                |        |            |
| ATOM | 4420 | CA  | THR | X | 405 | 23.798-113.106 | 39.173 | 1.00141.82 |
| C    |      |     |     |   |     |                |        |            |
| ATOM | 4421 | C   | THR | X | 405 | 25.062-113.871 | 39.584 | 1.00150.82 |
| C    |      |     |     |   |     |                |        |            |
| ATOM | 4422 | O   | THR | X | 405 | 25.172-115.088 | 39.415 | 1.00151.99 |
| O    |      |     |     |   |     |                |        |            |
| ATOM | 4423 | CB  | THR | X | 405 | 23.908-112.817 | 37.648 | 1.00141.04 |
| C    |      |     |     |   |     |                |        |            |
| ATOM | 4424 | OG1 | THR | X | 405 | 25.226-112.349 | 37.330 | 1.00141.87 |
| O    |      |     |     |   |     |                |        |            |
| ATOM | 4425 | CG2 | THR | X | 405 | 22.879-111.764 | 37.203 | 1.00137.80 |
| C    |      |     |     |   |     |                |        |            |
| ATOM | 4426 | N   | LYS | X | 406 | 25.982-113.134 | 40.195 | 1.00162.00 |
| N    |      |     |     |   |     |                |        |            |
| ATOM | 4427 | CA  | LYS | X | 406 | 27.182-113.718 | 40.810 | 1.00171.48 |
| C    |      |     |     |   |     |                |        |            |
| ATOM | 4428 | C   | LYS | X | 406 | 27.079-113.542 | 42.330 | 1.00171.15 |
| C    |      |     |     |   |     |                |        |            |
| ATOM | 4429 | O   | LYS | X | 406 | 26.601-112.505 | 42.815 | 1.00169.95 |
| O    |      |     |     |   |     |                |        |            |
| ATOM | 4430 | CB  | LYS | X | 406 | 28.447-113.004 | 40.308 | 1.00169.30 |
| C    |      |     |     |   |     |                |        |            |
| ATOM | 4431 | CG  | LYS | X | 406 | 28.715-113.114 | 38.810 | 1.00159.94 |
| C    |      |     |     |   |     |                |        |            |
| ATOM | 4432 | CD  | LYS | X | 406 | 30.125-112.634 | 38.476 | 1.00158.62 |
| C    |      |     |     |   |     |                |        |            |
| ATOM | 4433 | CE  | LYS | X | 406 | 30.141-111.174 | 38.059 | 1.00159.24 |
| C    |      |     |     |   |     |                |        |            |
| ATOM | 4434 | NZ  | LYS | X | 406 | 30.012-111.027 | 36.580 | 1.00167.30 |
| N1+  |      |     |     |   |     |                |        |            |
| ATOM | 4435 | N   | LYS | X | 407 | 27.549-114.540 | 43.069 | 1.00171.16 |
| N    |      |     |     |   |     |                |        |            |
| ATOM | 4436 | CA  | LYS | X | 407 | 27.414-114.536 | 44.529 | 1.00174.88 |
| C    |      |     |     |   |     |                |        |            |
| ATOM | 4437 | C   | LYS | X | 407 | 28.589-113.819 | 45.215 | 1.00176.66 |
| C    |      |     |     |   |     |                |        |            |
| ATOM | 4438 | O   | LYS | X | 407 | 28.695-113.839 | 46.446 | 1.00170.80 |
| O    |      |     |     |   |     |                |        |            |
| ATOM | 4439 | CB  | LYS | X | 407 | 27.246-115.966 | 45.052 | 1.00177.97 |
| C    |      |     |     |   |     |                |        |            |
| ATOM | 4440 | CG  | LYS | X | 407 | 26.885-117.002 | 43.977 | 1.00191.79 |
| C    |      |     |     |   |     |                |        |            |
| ATOM | 4441 | CD  | LYS | X | 407 | 25.718-116.593 | 43.072 | 1.00195.57 |
| C    |      |     |     |   |     |                |        |            |
| ATOM | 4442 | CE  | LYS | X | 407 | 24.435-117.297 | 43.465 | 1.00204.47 |
| C    |      |     |     |   |     |                |        |            |
| ATOM | 4443 | NZ  | LYS | X | 407 | 24.105-117.013 | 44.891 | 1.00212.67 |
| N1+  |      |     |     |   |     |                |        |            |
| ATOM | 4444 | N   | ASP | X | 408 | 29.408-113.130 | 44.417 | 1.00178.69 |
| N    |      |     |     |   |     |                |        |            |
| ATOM | 4445 | CA  | ASP | X | 408 | 30.588-112.442 | 44.929 | 1.00184.34 |
| C    |      |     |     |   |     |                |        |            |



|      |      |     |     |   |     |                |        |            |
|------|------|-----|-----|---|-----|----------------|--------|------------|
| ATOM | 4446 | C   | ASP | X | 408 | 30.485-110.943 | 44.687 | 1.00185.42 |
| C    |      |     |     |   |     |                |        |            |
| ATOM | 4447 | O   | ASP | X | 408 | 31.354-110.174 | 45.124 | 1.00200.63 |
| O    |      |     |     |   |     |                |        |            |
| ATOM | 4448 | CB  | ASP | X | 408 | 31.859-113.018 | 44.291 | 1.00181.52 |
| C    |      |     |     |   |     |                |        |            |
| ATOM | 4449 | CG  | ASP | X | 408 | 32.055-112.547 | 42.883 | 1.00180.48 |
| C    |      |     |     |   |     |                |        |            |
| ATOM | 4450 | OD1 | ASP | X | 408 | 31.087-112.636 | 42.101 | 1.00190.40 |
| O    |      |     |     |   |     |                |        |            |
| ATOM | 4451 | OD2 | ASP | X | 408 | 33.143-112.025 | 42.572 | 1.00179.35 |
| O1-  |      |     |     |   |     |                |        |            |
| ATOM | 4452 | N   | MET | X | 409 | 29.344-110.491 | 44.135 | 1.00179.27 |
| N    |      |     |     |   |     |                |        |            |
| ATOM | 4453 | CA  | MET | X | 409 | 29.012-109.070 | 44.041 | 1.00172.26 |
| C    |      |     |     |   |     |                |        |            |
| ATOM | 4454 | C   | MET | X | 409 | 28.432-108.532 | 45.344 | 1.00155.90 |
| C    |      |     |     |   |     |                |        |            |
| ATOM | 4455 | O   | MET | X | 409 | 27.631-109.203 | 46.004 | 1.00144.85 |
| O    |      |     |     |   |     |                |        |            |
| ATOM | 4456 | CB  | MET | X | 409 | 28.000-108.810 | 42.936 | 1.00174.60 |
| C    |      |     |     |   |     |                |        |            |
| ATOM | 4457 | CG  | MET | X | 409 | 28.643-108.512 | 41.618 | 1.00180.85 |
| C    |      |     |     |   |     |                |        |            |
| ATOM | 4458 | SD  | MET | X | 409 | 27.682-109.159 | 40.264 | 1.00190.71 |
| S    |      |     |     |   |     |                |        |            |
| ATOM | 4459 | CE  | MET | X | 409 | 28.564-108.381 | 38.908 | 1.00194.57 |
| C    |      |     |     |   |     |                |        |            |
| ATOM | 4460 | N   | SER | X | 410 | 28.797-107.292 | 45.672 | 1.00140.81 |
| N    |      |     |     |   |     |                |        |            |
| ATOM | 4461 | CA  | SER | X | 410 | 28.135-106.585 | 46.766 | 1.00139.23 |
| C    |      |     |     |   |     |                |        |            |
| ATOM | 4462 | C   | SER | X | 410 | 26.997-105.669 | 46.265 | 1.00130.73 |
| C    |      |     |     |   |     |                |        |            |
| ATOM | 4463 | O   | SER | X | 410 | 27.019-105.197 | 45.134 | 1.00134.72 |
| O    |      |     |     |   |     |                |        |            |
| ATOM | 4464 | CB  | SER | X | 410 | 29.119-105.780 | 47.573 | 1.00151.28 |
| C    |      |     |     |   |     |                |        |            |
| ATOM | 4465 | OG  | SER | X | 410 | 28.576-105.411 | 48.825 | 1.00167.72 |
| O    |      |     |     |   |     |                |        |            |
| ATOM | 4466 | N   | PRO | X | 411 | 26.076-105.285 | 47.165 | 1.00122.00 |
| N    |      |     |     |   |     |                |        |            |
| ATOM | 4467 | CA  | PRO | X | 411 | 24.656-105.570 | 47.102 | 1.00115.82 |
| C    |      |     |     |   |     |                |        |            |
| ATOM | 4468 | C   | PRO | X | 411 | 24.283-106.832 | 46.336 | 1.00113.25 |
| C    |      |     |     |   |     |                |        |            |
| ATOM | 4469 | O   | PRO | X | 411 | 24.443-106.909 | 45.122 | 1.00122.43 |
| O    |      |     |     |   |     |                |        |            |
| ATOM | 4470 | CB  | PRO | X | 411 | 24.071-104.338 | 46.423 | 1.00113.74 |
| C    |      |     |     |   |     |                |        |            |
| ATOM | 4471 | CG  | PRO | X | 411 | 25.067-103.249 | 46.684 | 1.00117.24 |
| C    |      |     |     |   |     |                |        |            |
| ATOM | 4472 | CD  | PRO | X | 411 | 26.253-103.850 | 47.410 | 1.00120.09 |
| C    |      |     |     |   |     |                |        |            |

|      |      |     |     |   |     |                |        |            |
|------|------|-----|-----|---|-----|----------------|--------|------------|
| ATOM | 4473 | N   | GLN | X | 412 | 23.815-107.827 | 47.055 | 1.00109.27 |
| N    |      |     |     |   |     |                |        |            |
| ATOM | 4474 | CA  | GLN | X | 412 | 23.225-109.031 | 46.448 | 1.00110.34 |
| C    |      |     |     |   |     |                |        |            |
| ATOM | 4475 | C   | GLN | X | 412 | 21.814-108.734 | 45.939 | 1.00110.07 |
| C    |      |     |     |   |     |                |        |            |
| ATOM | 4476 | O   | GLN | X | 412 | 21.308-109.377 | 45.023 | 1.00120.22 |
| O    |      |     |     |   |     |                |        |            |
| ATOM | 4477 | CB  | GLN | X | 412 | 23.131-110.136 | 47.490 | 1.00112.90 |
| C    |      |     |     |   |     |                |        |            |
| ATOM | 4478 | CG  | GLN | X | 412 | 24.274-111.086 | 47.440 | 1.00114.07 |
| C    |      |     |     |   |     |                |        |            |
| ATOM | 4479 | CD  | GLN | X | 412 | 24.283-111.837 | 46.154 | 1.00110.34 |
| C    |      |     |     |   |     |                |        |            |
| ATOM | 4480 | OE1 | GLN | X | 412 | 23.270-112.423 | 45.776 | 1.00104.82 |
| O    |      |     |     |   |     |                |        |            |
| ATOM | 4481 | NE2 | GLN | X | 412 | 25.424-111.813 | 45.452 | 1.00110.96 |
| N    |      |     |     |   |     |                |        |            |
| ATOM | 4482 | N   | LYS | X | 413 | 21.175-107.775 | 46.610 | 1.00100.99 |
| N    |      |     |     |   |     |                |        |            |
| ATOM | 4483 | CA  | LYS | X | 413 | 19.889-107.215 | 46.194 | 1.00 92.36 |
| C    |      |     |     |   |     |                |        |            |
| ATOM | 4484 | C   | LYS | X | 413 | 19.807-105.757 | 46.549 | 1.00 88.84 |
| C    |      |     |     |   |     |                |        |            |
| ATOM | 4485 | O   | LYS | X | 413 | 20.544-105.258 | 47.373 | 1.00 89.64 |
| O    |      |     |     |   |     |                |        |            |
| ATOM | 4486 | CB  | LYS | X | 413 | 18.708-107.987 | 46.883 | 1.00 0.00  |
| C    |      |     |     |   |     |                |        |            |
| ATOM | 4487 | CG  | LYS | X | 413 | 18.749-107.916 | 48.422 | 1.00 0.00  |
| C    |      |     |     |   |     |                |        |            |
| ATOM | 4488 | CD  | LYS | X | 413 | 17.676-108.796 | 49.072 | 1.00 0.00  |
| C    |      |     |     |   |     |                |        |            |
| ATOM | 4489 | CE  | LYS | X | 413 | 17.792-108.701 | 50.598 | 1.00 0.00  |
| C    |      |     |     |   |     |                |        |            |
| ATOM | 4490 | NZ  | LYS | X | 413 | 16.847-109.603 | 51.274 | 1.00 0.00  |
| N1+  |      |     |     |   |     |                |        |            |
| ATOM | 4491 | N   | PHE | X | 414 | 18.887-105.087 | 45.890 | 1.00 88.50 |
| N    |      |     |     |   |     |                |        |            |
| ATOM | 4492 | CA  | PHE | X | 414 | 18.649-103.647 | 46.113 | 1.00 90.57 |
| C    |      |     |     |   |     |                |        |            |
| ATOM | 4493 | C   | PHE | X | 414 | 17.486-103.248 | 45.261 | 1.00 86.61 |
| C    |      |     |     |   |     |                |        |            |
| ATOM | 4494 | O   | PHE | X | 414 | 17.259-103.884 | 44.243 | 1.00 92.23 |
| O    |      |     |     |   |     |                |        |            |
| ATOM | 4495 | CB  | PHE | X | 414 | 19.896-102.802 | 45.741 | 1.00 95.08 |
| C    |      |     |     |   |     |                |        |            |
| ATOM | 4496 | CG  | PHE | X | 414 | 20.097-102.583 | 44.271 | 1.00 95.91 |
| C    |      |     |     |   |     |                |        |            |
| ATOM | 4497 | CD1 | PHE | X | 414 | 19.377-101.625 | 43.608 | 1.00 94.99 |
| C    |      |     |     |   |     |                |        |            |
| ATOM | 4498 | CD2 | PHE | X | 414 | 21.146-103.225 | 43.605 | 1.00103.11 |
| C    |      |     |     |   |     |                |        |            |
| ATOM | 4499 | CE1 | PHE | X | 414 | 19.588-101.409 | 42.263 | 1.00103.69 |
| C    |      |     |     |   |     |                |        |            |

|      |      |     |     |   |     |                |        |            |
|------|------|-----|-----|---|-----|----------------|--------|------------|
| ATOM | 4500 | CE2 | PHE | X | 414 | 21.359-103.030 | 42.246 | 1.00108.25 |
| C    |      |     |     |   |     |                |        |            |
| ATOM | 4501 | CZ  | PHE | X | 414 | 20.572-102.108 | 41.555 | 1.00107.49 |
| C    |      |     |     |   |     |                |        |            |
| ATOM | 4502 | N   | TRP | X | 415 | 16.814-102.152 | 45.605 | 1.00 83.21 |
| N    |      |     |     |   |     |                |        |            |
| ATOM | 4503 | CA  | TRP | X | 415 | 15.751-101.666 | 44.771 | 1.00 83.60 |
| C    |      |     |     |   |     |                |        |            |
| ATOM | 4504 | C   | TRP | X | 415 | 16.158-100.483 | 43.935 | 1.00 81.77 |
| C    |      |     |     |   |     |                |        |            |
| ATOM | 4505 | O   | TRP | X | 415 | 16.942 -99.627 | 44.344 | 1.00 82.53 |
| O    |      |     |     |   |     |                |        |            |
| ATOM | 4506 | CB  | TRP | X | 415 | 14.547-101.359 | 45.572 | 1.00 86.15 |
| C    |      |     |     |   |     |                |        |            |
| ATOM | 4507 | CG  | TRP | X | 415 | 13.715-102.508 | 45.859 | 1.00 90.63 |
| C    |      |     |     |   |     |                |        |            |
| ATOM | 4508 | CD1 | TRP | X | 415 | 12.485-102.790 | 45.319 | 1.00 92.99 |
| C    |      |     |     |   |     |                |        |            |
| ATOM | 4509 | CD2 | TRP | X | 415 | 13.899-103.398 | 46.901 | 1.00 97.57 |
| C    |      |     |     |   |     |                |        |            |
| ATOM | 4510 | NE1 | TRP | X | 415 | 11.919-103.848 | 45.947 | 1.00 94.24 |
| N    |      |     |     |   |     |                |        |            |
| ATOM | 4511 | CE2 | TRP | X | 415 | 12.746-104.223 | 46.960 | 1.00100.71 |
| C    |      |     |     |   |     |                |        |            |
| ATOM | 4512 | CE3 | TRP | X | 415 | 14.860-103.520 | 47.879 | 1.00110.61 |
| C    |      |     |     |   |     |                |        |            |
| ATOM | 4513 | CZ2 | TRP | X | 415 | 12.568-105.204 | 47.930 | 1.00116.76 |
| C    |      |     |     |   |     |                |        |            |
| ATOM | 4514 | CZ3 | TRP | X | 415 | 14.671-104.487 | 48.887 | 1.00132.60 |
| C    |      |     |     |   |     |                |        |            |
| ATOM | 4515 | CH2 | TRP | X | 415 | 13.532-105.324 | 48.891 | 1.00131.32 |
| C    |      |     |     |   |     |                |        |            |
| ATOM | 4516 | N   | GLY | X | 416 | 15.690-100.432 | 42.690 | 1.00 82.15 |
| N    |      |     |     |   |     |                |        |            |
| ATOM | 4517 | CA  | GLY | X | 416 | 15.845 -99.275 | 41.810 | 1.00 82.91 |
| C    |      |     |     |   |     |                |        |            |
| ATOM | 4518 | C   | GLY | X | 416 | 14.464 -98.712 | 41.529 | 1.00 84.54 |
| C    |      |     |     |   |     |                |        |            |
| ATOM | 4519 | O   | GLY | X | 416 | 13.660 -99.373 | 40.866 | 1.00 82.41 |
| O    |      |     |     |   |     |                |        |            |
| ATOM | 4520 | N   | LEU | X | 417 | 14.169 -97.526 | 42.059 | 1.00 85.66 |
| N    |      |     |     |   |     |                |        |            |
| ATOM | 4521 | CA  | LEU | X | 417 | 12.834 -96.989 | 42.084 | 1.00 82.93 |
| C    |      |     |     |   |     |                |        |            |
| ATOM | 4522 | C   | LEU | X | 417 | 12.722 -95.788 | 41.190 | 1.00 77.99 |
| C    |      |     |     |   |     |                |        |            |
| ATOM | 4523 | O   | LEU | X | 417 | 13.485 -94.838 | 41.317 | 1.00 77.32 |
| O    |      |     |     |   |     |                |        |            |
| ATOM | 4524 | CB  | LEU | X | 417 | 12.389 -96.605 | 43.509 | 1.00 85.98 |
| C    |      |     |     |   |     |                |        |            |
| ATOM | 4525 | CG  | LEU | X | 417 | 12.512 -97.709 | 44.567 | 1.00 89.43 |
| C    |      |     |     |   |     |                |        |            |
| ATOM | 4526 | CD1 | LEU | X | 417 | 12.417 -97.123 | 45.969 | 1.00 89.35 |
| C    |      |     |     |   |     |                |        |            |

|      |      |     |     |   |     |        |         |        |      |        |
|------|------|-----|-----|---|-----|--------|---------|--------|------|--------|
| ATOM | 4527 | CD2 | LEU | X | 417 | 11.485 | -98.828 | 44.372 | 1.00 | 89.73  |
| C    |      |     |     |   |     |        |         |        |      |        |
| ATOM | 4528 | N   | THR | X | 418 | 11.755 | -95.816 | 40.306 | 1.00 | 74.47  |
| N    |      |     |     |   |     |        |         |        |      |        |
| ATOM | 4529 | CA  | THR | X | 418 | 11.551 | -94.697 | 39.394 | 1.00 | 75.19  |
| C    |      |     |     |   |     |        |         |        |      |        |
| ATOM | 4530 | C   | THR | X | 418 | 10.955 | -93.497 | 40.133 | 1.00 | 73.11  |
| C    |      |     |     |   |     |        |         |        |      |        |
| ATOM | 4531 | O   | THR | X | 418 | 9.979  | -93.598 | 40.822 | 1.00 | 69.98  |
| O    |      |     |     |   |     |        |         |        |      |        |
| ATOM | 4532 | CB  | THR | X | 418 | 10.674 | -95.104 | 38.167 | 1.00 | 76.65  |
| C    |      |     |     |   |     |        |         |        |      |        |
| ATOM | 4533 | OG1 | THR | X | 418 | 10.838 | -94.152 | 37.066 | 1.00 | 76.46  |
| O    |      |     |     |   |     |        |         |        |      |        |
| ATOM | 4534 | CG2 | THR | X | 418 | 9.184  | -95.271 | 38.590 | 1.00 | 76.52  |
| C    |      |     |     |   |     |        |         |        |      |        |
| ATOM | 4535 | N   | ARG | X | 419 | 11.563 | -92.344 | 39.899 | 1.00 | 73.06  |
| N    |      |     |     |   |     |        |         |        |      |        |
| ATOM | 4536 | CA  | ARG | X | 419 | 11.115 | -91.045 | 40.398 | 1.00 | 75.08  |
| C    |      |     |     |   |     |        |         |        |      |        |
| ATOM | 4537 | C   | ARG | X | 419 | 9.690  | -90.655 | 40.003 | 1.00 | 75.55  |
| C    |      |     |     |   |     |        |         |        |      |        |
| ATOM | 4538 | O   | ARG | X | 419 | 9.035  | -90.013 | 40.752 | 1.00 | 75.15  |
| O    |      |     |     |   |     |        |         |        |      |        |
| ATOM | 4539 | CB  | ARG | X | 419 | 12.148 | -89.898 | 40.042 | 1.00 | 78.52  |
| C    |      |     |     |   |     |        |         |        |      |        |
| ATOM | 4540 | CG  | ARG | X | 419 | 11.728 | -88.425 | 40.309 | 1.00 | 81.26  |
| C    |      |     |     |   |     |        |         |        |      |        |
| ATOM | 4541 | CD  | ARG | X | 419 | 12.633 | -87.334 | 39.688 | 1.00 | 83.96  |
| C    |      |     |     |   |     |        |         |        |      |        |
| ATOM | 4542 | NE  | ARG | X | 419 | 11.969 | -86.657 | 38.546 | 1.00 | 92.43  |
| N    |      |     |     |   |     |        |         |        |      |        |
| ATOM | 4543 | CZ  | ARG | X | 419 | 11.681 | -85.342 | 38.433 | 1.00 | 99.27  |
| C    |      |     |     |   |     |        |         |        |      |        |
| ATOM | 4544 | NH1 | ARG | X | 419 | 11.044 | -84.879 | 37.324 | 1.00 | 105.15 |
| N    |      |     |     |   |     |        |         |        |      |        |
| ATOM | 4545 | NH2 | ARG | X | 419 | 12.014 | -84.483 | 39.386 | 1.00 | 97.36  |
| N1+  |      |     |     |   |     |        |         |        |      |        |
| ATOM | 4546 | N   | SER | X | 420 | 9.202  | -91.065 | 38.859 | 1.00 | 82.62  |
| N    |      |     |     |   |     |        |         |        |      |        |
| ATOM | 4547 | CA  | SER | X | 420 | 7.832  | -90.805 | 38.431 | 1.00 | 89.53  |
| C    |      |     |     |   |     |        |         |        |      |        |
| ATOM | 4548 | C   | SER | X | 420 | 6.786  | -91.464 | 39.367 | 1.00 | 83.82  |
| C    |      |     |     |   |     |        |         |        |      |        |
| ATOM | 4549 | O   | SER | X | 420 | 5.631  | -91.032 | 39.458 | 1.00 | 79.93  |
| O    |      |     |     |   |     |        |         |        |      |        |
| ATOM | 4550 | CB  | SER | X | 420 | 7.617  | -91.305 | 36.942 | 1.00 | 101.97 |
| C    |      |     |     |   |     |        |         |        |      |        |
| ATOM | 4551 | OG  | SER | X | 420 | 8.334  | -92.511 | 36.563 | 1.00 | 109.17 |
| O    |      |     |     |   |     |        |         |        |      |        |
| ATOM | 4552 | N   | ALA | X | 421 | 7.223  | -92.519 | 40.027 | 1.00 | 81.23  |
| N    |      |     |     |   |     |        |         |        |      |        |
| ATOM | 4553 | CA  | ALA | X | 421 | 6.365  | -93.290 | 40.883 | 1.00 | 85.56  |
| C    |      |     |     |   |     |        |         |        |      |        |

|      |      |     |     |   |     |        |         |        |      |        |
|------|------|-----|-----|---|-----|--------|---------|--------|------|--------|
| ATOM | 4554 | C   | ALA | X | 421 | 6.364  | -92.776 | 42.361 | 1.00 | 88.30  |
| C    |      |     |     |   |     |        |         |        |      |        |
| ATOM | 4555 | O   | ALA | X | 421 | 5.611  | -93.292 | 43.204 | 1.00 | 85.90  |
| O    |      |     |     |   |     |        |         |        |      |        |
| ATOM | 4556 | CB  | ALA | X | 421 | 6.733  | -94.754 | 40.754 | 1.00 | 85.89  |
| C    |      |     |     |   |     |        |         |        |      |        |
| ATOM | 4557 | N   | LEU | X | 422 | 7.176  | -91.781 | 42.659 | 1.00 | 91.13  |
| N    |      |     |     |   |     |        |         |        |      |        |
| ATOM | 4558 | CA  | LEU | X | 422 | 7.447  | -91.394 | 44.063 | 1.00 | 93.45  |
| C    |      |     |     |   |     |        |         |        |      |        |
| ATOM | 4559 | C   | LEU | X | 422 | 6.925  | -90.005 | 44.447 | 1.00 | 96.38  |
| C    |      |     |     |   |     |        |         |        |      |        |
| ATOM | 4560 | O   | LEU | X | 422 | 6.844  | -89.122 | 43.613 | 1.00 | 94.93  |
| O    |      |     |     |   |     |        |         |        |      |        |
| ATOM | 4561 | CB  | LEU | X | 422 | 8.940  | -91.405 | 44.356 | 1.00 | 96.66  |
| C    |      |     |     |   |     |        |         |        |      |        |
| ATOM | 4562 | CG  | LEU | X | 422 | 9.655  | -92.716 | 44.045 | 1.00 | 96.50  |
| C    |      |     |     |   |     |        |         |        |      |        |
| ATOM | 4563 | CD1 | LEU | X | 422 | 11.093 | -92.655 | 44.580 | 1.00 | 93.62  |
| C    |      |     |     |   |     |        |         |        |      |        |
| ATOM | 4564 | CD2 | LEU | X | 422 | 8.864  | -93.943 | 44.542 | 1.00 | 95.16  |
| C    |      |     |     |   |     |        |         |        |      |        |
| ATOM | 4565 | N   | LEU | X | 423 | 6.726  | -89.812 | 45.743 | 1.00 | 104.22 |
| N    |      |     |     |   |     |        |         |        |      |        |
| ATOM | 4566 | CA  | LEU | X | 423 | 6.384  | -88.520 | 46.342 | 1.00 | 105.95 |
| C    |      |     |     |   |     |        |         |        |      |        |
| ATOM | 4567 | C   | LEU | X | 423 | 7.220  | -88.342 | 47.621 | 1.00 | 105.81 |
| C    |      |     |     |   |     |        |         |        |      |        |
| ATOM | 4568 | O   | LEU | X | 423 | 6.981  | -89.010 | 48.600 | 1.00 | 111.62 |
| O    |      |     |     |   |     |        |         |        |      |        |
| ATOM | 4569 | CB  | LEU | X | 423 | 4.876  | -88.534 | 46.657 | 1.00 | 104.50 |
| C    |      |     |     |   |     |        |         |        |      |        |
| ATOM | 4570 | CG  | LEU | X | 423 | 4.265  | -87.261 | 47.214 | 1.00 | 105.71 |
| C    |      |     |     |   |     |        |         |        |      |        |
| ATOM | 4571 | CD1 | LEU | X | 423 | 4.254  | -87.234 | 48.736 | 1.00 | 106.46 |
| C    |      |     |     |   |     |        |         |        |      |        |
| ATOM | 4572 | CD2 | LEU | X | 423 | 5.000  | -86.049 | 46.644 | 1.00 | 108.83 |
| C    |      |     |     |   |     |        |         |        |      |        |
| ATOM | 4573 | N   | PRO | X | 424 | 8.245  | -87.472 | 47.599 | 1.00 | 110.55 |
| N    |      |     |     |   |     |        |         |        |      |        |
| ATOM | 4574 | CA  | PRO | X | 424 | 8.984  | -87.152 | 48.804 | 1.00 | 119.12 |
| C    |      |     |     |   |     |        |         |        |      |        |
| ATOM | 4575 | C   | PRO | X | 424 | 8.083  | -86.552 | 49.889 | 1.00 | 131.47 |
| C    |      |     |     |   |     |        |         |        |      |        |
| ATOM | 4576 | O   | PRO | X | 424 | 7.229  | -85.702 | 49.594 | 1.00 | 141.87 |
| O    |      |     |     |   |     |        |         |        |      |        |
| ATOM | 4577 | CB  | PRO | X | 424 | 10.042 | -86.155 | 48.313 | 1.00 | 115.32 |
| C    |      |     |     |   |     |        |         |        |      |        |
| ATOM | 4578 | CG  | PRO | X | 424 | 10.308 | -86.557 | 46.930 | 1.00 | 118.93 |
| C    |      |     |     |   |     |        |         |        |      |        |
| ATOM | 4579 | CD  | PRO | X | 424 | 9.114  | -87.361 | 46.421 | 1.00 | 122.08 |
| C    |      |     |     |   |     |        |         |        |      |        |
| ATOM | 4580 | N   | THR | X | 425 | 8.229  | -87.038 | 51.136 | 1.00 | 126.75 |
| N    |      |     |     |   |     |        |         |        |      |        |

|      |      |     |     |   |     |       |         |        |            |
|------|------|-----|-----|---|-----|-------|---------|--------|------------|
| ATOM | 4581 | CA  | THR | X | 425 | 7.521 | -86.431 | 52.228 | 1.00124.50 |
| C    |      |     |     |   |     |       |         |        |            |
| ATOM | 4582 | C   | THR | X | 425 | 8.465 | -85.943 | 53.313 | 1.00124.66 |
| C    |      |     |     |   |     |       |         |        |            |
| ATOM | 4583 | O   | THR | X | 425 | 9.625 | -86.445 | 53.475 | 1.00114.71 |
| O    |      |     |     |   |     |       |         |        |            |
| ATOM | 4584 | CB  | THR | X | 425 | 6.323 | -87.271 | 52.789 | 1.00127.50 |
| C    |      |     |     |   |     |       |         |        |            |
| ATOM | 4585 | OG1 | THR | X | 425 | 5.540 | -87.781 | 51.708 | 1.00116.98 |
| O    |      |     |     |   |     |       |         |        |            |
| ATOM | 4586 | CG2 | THR | X | 425 | 5.369 | -86.386 | 53.711 | 1.00129.47 |
| C    |      |     |     |   |     |       |         |        |            |
| ATOM | 4587 | N   | ILE | X | 426 | 8.044 | -84.793 | 53.836 | 1.00131.55 |
| N    |      |     |     |   |     |       |         |        |            |
| ATOM | 4588 | CA  | ILE | X | 426 | 8.333 | -84.337 | 55.165 | 1.00148.09 |
| C    |      |     |     |   |     |       |         |        |            |
| ATOM | 4589 | C   | ILE | X | 426 | 7.393 | -85.033 | 56.192 | 1.00160.40 |
| C    |      |     |     |   |     |       |         |        |            |
| ATOM | 4590 | O   | ILE | X | 426 | 6.174 | -84.710 | 56.295 | 1.00177.97 |
| O    |      |     |     |   |     |       |         |        |            |
| ATOM | 4591 | CB  | ILE | X | 426 | 8.127 | -82.803 | 55.161 | 1.00145.06 |
| C    |      |     |     |   |     |       |         |        |            |
| ATOM | 4592 | CG1 | ILE | X | 426 | 8.373 | -82.222 | 56.562 | 1.00152.59 |
| C    |      |     |     |   |     |       |         |        |            |
| ATOM | 4593 | CG2 | ILE | X | 426 | 6.754 | -82.434 | 54.541 | 1.00137.64 |
| C    |      |     |     |   |     |       |         |        |            |
| ATOM | 4594 | CD1 | ILE | X | 426 | 9.628 | -82.740 | 57.246 | 1.00156.85 |
| C    |      |     |     |   |     |       |         |        |            |
| ATOM | 4595 | N   | PRO | X | 427 | 7.974 | -85.974 | 56.990 | 1.00148.04 |
| N    |      |     |     |   |     |       |         |        |            |
| ATOM | 4596 | CA  | PRO | X | 427 | 7.299 | -86.704 | 58.079 | 1.00148.68 |
| C    |      |     |     |   |     |       |         |        |            |
| ATOM | 4597 | C   | PRO | X | 427 | 6.577 | -85.861 | 59.117 | 1.00159.21 |
| C    |      |     |     |   |     |       |         |        |            |
| ATOM | 4598 | O   | PRO | X | 427 | 6.915 | -84.710 | 59.245 | 1.00173.17 |
| O    |      |     |     |   |     |       |         |        |            |
| ATOM | 4599 | CB  | PRO | X | 427 | 8.456 | -87.416 | 58.792 | 1.00141.11 |
| C    |      |     |     |   |     |       |         |        |            |
| ATOM | 4600 | CG  | PRO | X | 427 | 9.693 | -86.789 | 58.279 | 1.00137.67 |
| C    |      |     |     |   |     |       |         |        |            |
| ATOM | 4601 | CD  | PRO | X | 427 | 9.374 | -86.411 | 56.881 | 1.00138.57 |
| C    |      |     |     |   |     |       |         |        |            |
| ATOM | 4602 | N   | ASP | X | 428 | 5.539 | -86.418 | 59.747 | 1.00170.35 |
| N    |      |     |     |   |     |       |         |        |            |
| ATOM | 4603 | CA  | ASP | X | 428 | 4.543 | -85.671 | 60.573 | 1.00181.27 |
| C    |      |     |     |   |     |       |         |        |            |
| ATOM | 4604 | C   | ASP | X | 428 | 3.305 | -85.048 | 59.838 | 1.00206.56 |
| C    |      |     |     |   |     |       |         |        |            |
| ATOM | 4605 | O   | ASP | X | 428 | 3.207 | -85.005 | 58.569 | 1.00195.44 |
| O    |      |     |     |   |     |       |         |        |            |
| ATOM | 4606 | CB  | ASP | X | 428 | 5.182 | -84.567 | 61.458 | 1.00164.85 |
| C    |      |     |     |   |     |       |         |        |            |
| ATOM | 4607 | CG  | ASP | X | 428 | 6.235 | -85.089 | 62.396 | 1.00152.59 |
| C    |      |     |     |   |     |       |         |        |            |

|      |      |     |     |   |     |        |         |        |            |
|------|------|-----|-----|---|-----|--------|---------|--------|------------|
| ATOM | 4608 | OD1 | ASP | X | 428 | 7.058  | -85.925 | 61.957 | 1.00143.00 |
| O    |      |     |     |   |     |        |         |        |            |
| ATOM | 4609 | OD2 | ASP | X | 428 | 6.297  | -84.581 | 63.540 | 1.00139.45 |
| O1-  |      |     |     |   |     |        |         |        |            |
| ATOM | 4610 | N   | THR | X | 429 | 2.351  | -84.648 | 60.701 | 1.00216.23 |
| N    |      |     |     |   |     |        |         |        |            |
| ATOM | 4611 | CA  | THR | X | 429 | 1.354  | -83.583 | 60.459 | 1.00199.66 |
| C    |      |     |     |   |     |        |         |        |            |
| ATOM | 4612 | C   | THR | X | 429 | 1.682  | -82.297 | 61.297 | 1.00190.71 |
| C    |      |     |     |   |     |        |         |        |            |
| ATOM | 4613 | O   | THR | X | 429 | 0.765  | -81.616 | 61.749 | 1.00190.34 |
| O    |      |     |     |   |     |        |         |        |            |
| ATOM | 4614 | CB  | THR | X | 429 | -0.132 | -84.097 | 60.733 | 1.00184.07 |
| C    |      |     |     |   |     |        |         |        |            |
| ATOM | 4615 | OG1 | THR | X | 429 | -0.713 | -83.448 | 61.875 | 1.00162.19 |
| O    |      |     |     |   |     |        |         |        |            |
| ATOM | 4616 | CG2 | THR | X | 429 | -0.215 | -85.655 | 60.940 | 1.00171.40 |
| C    |      |     |     |   |     |        |         |        |            |
| ATOM | 4617 | N   | GLU | X | 430 | 2.977  | -81.924 | 61.393 | 1.00181.69 |
| N    |      |     |     |   |     |        |         |        |            |
| ATOM | 4618 | CA  | GLU | X | 430 | 3.465  | -80.848 | 62.331 | 1.00178.46 |
| C    |      |     |     |   |     |        |         |        |            |
| ATOM | 4619 | C   | GLU | X | 430 | 4.015  | -79.516 | 61.671 | 1.00185.57 |
| C    |      |     |     |   |     |        |         |        |            |
| ATOM | 4620 | O   | GLU | X | 430 | 4.210  | -78.513 | 62.398 | 1.00157.01 |
| O    |      |     |     |   |     |        |         |        |            |
| ATOM | 4621 | CB  | GLU | X | 430 | 4.533  | -81.415 | 63.288 | 1.00171.53 |
| C    |      |     |     |   |     |        |         |        |            |
| ATOM | 4622 | CG  | GLU | X | 430 | 3.988  | -82.266 | 64.439 | 1.00174.27 |
| C    |      |     |     |   |     |        |         |        |            |
| ATOM | 4623 | CD  | GLU | X | 430 | 3.675  | -81.467 | 65.718 | 1.00170.85 |
| C    |      |     |     |   |     |        |         |        |            |
| ATOM | 4624 | OE1 | GLU | X | 430 | 3.021  | -80.401 | 65.608 | 1.00167.14 |
| O    |      |     |     |   |     |        |         |        |            |
| ATOM | 4625 | OE2 | GLU | X | 430 | 4.034  | -81.938 | 66.839 | 1.00152.17 |
| O1-  |      |     |     |   |     |        |         |        |            |
| ATOM | 4626 | N   | ASP | X | 431 | 4.456  | -79.589 | 60.388 | 1.00203.83 |
| N    |      |     |     |   |     |        |         |        |            |
| ATOM | 4627 | CA  | ASP | X | 431 | 4.142  | -78.561 | 59.300 | 1.00184.39 |
| C    |      |     |     |   |     |        |         |        |            |
| ATOM | 4628 | C   | ASP | X | 431 | 3.845  | -79.165 | 57.876 | 1.00162.13 |
| C    |      |     |     |   |     |        |         |        |            |
| ATOM | 4629 | O   | ASP | X | 431 | 4.044  | -78.484 | 56.863 | 1.00138.30 |
| O    |      |     |     |   |     |        |         |        |            |
| ATOM | 4630 | CB  | ASP | X | 431 | 5.216  | -77.414 | 59.150 | 1.00176.40 |
| C    |      |     |     |   |     |        |         |        |            |
| ATOM | 4631 | CG  | ASP | X | 431 | 6.560  | -77.720 | 59.822 | 1.00178.44 |
| C    |      |     |     |   |     |        |         |        |            |
| ATOM | 4632 | OD1 | ASP | X | 431 | 6.583  | -77.882 | 61.068 | 1.00182.53 |
| O    |      |     |     |   |     |        |         |        |            |
| ATOM | 4633 | OD2 | ASP | X | 431 | 7.608  | -77.621 | 59.123 | 1.00162.42 |
| O1-  |      |     |     |   |     |        |         |        |            |
| ATOM | 4634 | N   | GLU | X | 432 | 3.287  | -80.383 | 57.819 | 1.00151.42 |
| N    |      |     |     |   |     |        |         |        |            |

|      |      |     |     |   |     |        |         |        |            |
|------|------|-----|-----|---|-----|--------|---------|--------|------------|
| ATOM | 4635 | CA  | GLU | X | 432 | 3.211  | -81.152 | 56.564 | 1.00149.41 |
| C    |      |     |     |   |     |        |         |        |            |
| ATOM | 4636 | C   | GLU | X | 432 | 2.283  | -80.471 | 55.514 | 1.00143.53 |
| C    |      |     |     |   |     |        |         |        |            |
| ATOM | 4637 | O   | GLU | X | 432 | 2.032  | -80.681 | 54.318 | 1.00118.98 |
| O    |      |     |     |   |     |        |         |        |            |
| ATOM | 4638 | CB  | GLU | X | 432 | 2.676  | -82.597 | 56.848 | 1.00 0.00  |
| C    |      |     |     |   |     |        |         |        |            |
| ATOM | 4639 | CG  | GLU | X | 432 | 2.494  | -83.438 | 55.571 | 1.00 0.00  |
| C    |      |     |     |   |     |        |         |        |            |
| ATOM | 4640 | CD  | GLU | X | 432 | 1.986  | -84.856 | 55.838 | 1.00 0.00  |
| C    |      |     |     |   |     |        |         |        |            |
| ATOM | 4641 | OE1 | GLU | X | 432 | 2.538  | -85.860 | 55.396 | 1.00 0.00  |
| O    |      |     |     |   |     |        |         |        |            |
| ATOM | 4642 | OE2 | GLU | X | 432 | 0.850  | -84.914 | 56.592 | 1.00 0.00  |
| O1-  |      |     |     |   |     |        |         |        |            |
| ATOM | 4643 | N   | ILE | X | 433 | 1.410  | -79.629 | 56.093 | 1.00 0.00  |
| N    |      |     |     |   |     |        |         |        |            |
| ATOM | 4644 | CA  | ILE | X | 433 | -0.039 | -79.814 | 55.965 | 1.00 0.00  |
| C    |      |     |     |   |     |        |         |        |            |
| ATOM | 4645 | C   | ILE | X | 433 | -0.822 | -78.620 | 55.396 | 1.00 0.00  |
| C    |      |     |     |   |     |        |         |        |            |
| ATOM | 4646 | O   | ILE | X | 433 | -2.025 | -78.746 | 55.181 | 1.00 0.00  |
| O    |      |     |     |   |     |        |         |        |            |
| ATOM | 4647 | CB  | ILE | X | 433 | -0.562 | -80.398 | 57.305 | 1.00 0.00  |
| C    |      |     |     |   |     |        |         |        |            |
| ATOM | 4648 | CG2 | ILE | X | 433 | -0.442 | -79.424 | 58.496 | 1.00 0.00  |
| C    |      |     |     |   |     |        |         |        |            |
| ATOM | 4649 | CG1 | ILE | X | 433 | -1.998 | -80.950 | 57.150 | 1.00 0.00  |
| C    |      |     |     |   |     |        |         |        |            |
| ATOM | 4650 | CD1 | ILE | X | 433 | -2.328 | -82.073 | 58.141 | 1.00 0.00  |
| C    |      |     |     |   |     |        |         |        |            |
| ATOM | 4651 | N   | SER | X | 434 | -0.195 | -77.462 | 55.159 | 1.00 0.00  |
| N    |      |     |     |   |     |        |         |        |            |
| ATOM | 4652 | CA  | SER | X | 434 | -0.951 | -76.270 | 54.748 | 1.00 0.00  |
| C    |      |     |     |   |     |        |         |        |            |
| ATOM | 4653 | C   | SER | X | 434 | -1.516 | -76.364 | 53.308 | 1.00 0.00  |
| C    |      |     |     |   |     |        |         |        |            |
| ATOM | 4654 | O   | SER | X | 434 | -2.715 | -76.139 | 53.145 | 1.00 0.00  |
| O    |      |     |     |   |     |        |         |        |            |
| ATOM | 4655 | CB  | SER | X | 434 | -0.052 | -75.027 | 54.840 | 1.00 0.00  |
| C    |      |     |     |   |     |        |         |        |            |
| ATOM | 4656 | OG  | SER | X | 434 | 0.100  | -74.616 | 56.180 | 1.00 0.00  |
| O    |      |     |     |   |     |        |         |        |            |
| ATOM | 4657 | N   | PRO | X | 435 | -0.776 | -76.886 | 52.305 | 1.00 0.00  |
| N    |      |     |     |   |     |        |         |        |            |
| ATOM | 4658 | CD  | PRO | X | 435 | 0.667  | -76.850 | 52.150 | 1.00 0.00  |
| C    |      |     |     |   |     |        |         |        |            |
| ATOM | 4659 | CG  | PRO | X | 435 | 0.857  | -76.306 | 50.738 | 1.00 0.00  |
| C    |      |     |     |   |     |        |         |        |            |
| ATOM | 4660 | CB  | PRO | X | 435 | -0.317 | -76.914 | 49.956 | 1.00 0.00  |
| C    |      |     |     |   |     |        |         |        |            |
| ATOM | 4661 | CA  | PRO | X | 435 | -1.336 | -77.343 | 51.031 | 1.00 0.00  |
| C    |      |     |     |   |     |        |         |        |            |



|      |      |     |     |   |      |        |         |        |      |        |
|------|------|-----|-----|---|------|--------|---------|--------|------|--------|
| ATOM | 4662 | C   | PRO | X | 435  | -1.648 | -78.856 | 51.089 | 1.00 | 0.00   |
| C    |      |     |     |   |      |        |         |        |      |        |
| ATOM | 4663 | O   | PRO | X | 435  | -1.347 | -79.597 | 50.157 | 1.00 | 0.00   |
| O    |      |     |     |   |      |        |         |        |      |        |
| ATOM | 4664 | N   | ASP | X | 436A | -2.145 | -79.332 | 52.240 | 1.00 | 0.00   |
| N    |      |     |     |   |      |        |         |        |      |        |
| ATOM | 4665 | CA  | ASP | X | 436A | -2.331 | -80.731 | 52.661 | 1.00 | 0.00   |
| C    |      |     |     |   |      |        |         |        |      |        |
| ATOM | 4666 | C   | ASP | X | 436A | -1.068 | -81.620 | 52.727 | 1.00 | 0.00   |
| C    |      |     |     |   |      |        |         |        |      |        |
| ATOM | 4667 | O   | ASP | X | 436A | -0.942 | -82.386 | 53.676 | 1.00 | 0.00   |
| O    |      |     |     |   |      |        |         |        |      |        |
| ATOM | 4668 | CB  | ASP | X | 436A | -3.356 | -81.418 | 51.680 | 1.00 | 0.00   |
| C    |      |     |     |   |      |        |         |        |      |        |
| ATOM | 4669 | CG  | ASP | X | 436A | -3.944 | -82.760 | 52.134 | 1.00 | 0.00   |
| C    |      |     |     |   |      |        |         |        |      |        |
| ATOM | 4670 | OD1 | ASP | X | 436A | -4.118 | -83.711 | 51.375 | 1.00 | 0.00   |
| O    |      |     |     |   |      |        |         |        |      |        |
| ATOM | 4671 | OD2 | ASP | X | 436A | -4.288 | -82.806 | 53.455 | 1.00 | 0.00   |
| O1-  |      |     |     |   |      |        |         |        |      |        |
| ATOM | 4672 | N   | LYS | X | 437A | -0.149 | -81.535 | 51.760 | 1.00 | 0.00   |
| N    |      |     |     |   |      |        |         |        |      |        |
| ATOM | 4673 | CA  | LYS | X | 437A | 0.974  | -82.472 | 51.610 | 1.00 | 0.00   |
| C    |      |     |     |   |      |        |         |        |      |        |
| ATOM | 4674 | C   | LYS | X | 437A | 2.235  | -81.837 | 50.971 | 1.00 | 0.00   |
| C    |      |     |     |   |      |        |         |        |      |        |
| ATOM | 4675 | O   | LYS | X | 437A | 2.928  | -82.494 | 50.198 | 1.00 | 0.00   |
| O    |      |     |     |   |      |        |         |        |      |        |
| ATOM | 4676 | CB  | LYS | X | 437A | 0.532  | -83.690 | 50.728 | 1.00 | 0.00   |
| C    |      |     |     |   |      |        |         |        |      |        |
| ATOM | 4677 | CG  | LYS | X | 437A | -0.428 | -84.663 | 51.437 | 1.00 | 0.00   |
| C    |      |     |     |   |      |        |         |        |      |        |
| ATOM | 4678 | CD  | LYS | X | 437A | 0.145  | -85.359 | 52.689 | 1.00 | 0.00   |
| C    |      |     |     |   |      |        |         |        |      |        |
| ATOM | 4679 | CE  | LYS | X | 437A | 1.474  | -86.101 | 52.473 | 1.00 | 0.00   |
| C    |      |     |     |   |      |        |         |        |      |        |
| ATOM | 4680 | NZ  | LYS | X | 437A | 1.363  | -87.158 | 51.454 | 1.00 | 0.00   |
| N1+  |      |     |     |   |      |        |         |        |      |        |
| ATOM | 4681 | N   | VAL | X | 438A | 2.432  | -80.526 | 51.173 | 1.00 | 126.10 |
| N    |      |     |     |   |      |        |         |        |      |        |
| ATOM | 4682 | CA  | VAL | X | 438A | 3.190  | -79.914 | 50.061 | 1.00 | 122.52 |
| C    |      |     |     |   |      |        |         |        |      |        |
| ATOM | 4683 | C   | VAL | X | 438A | 4.357  | -79.090 | 50.625 | 1.00 | 121.56 |
| C    |      |     |     |   |      |        |         |        |      |        |
| ATOM | 4684 | O   | VAL | X | 438A | 4.197  | -77.913 | 50.981 | 1.00 | 119.35 |
| O    |      |     |     |   |      |        |         |        |      |        |
| ATOM | 4685 | CB  | VAL | X | 438A | 2.225  | -79.084 | 49.179 | 1.00 | 0.00   |
| C    |      |     |     |   |      |        |         |        |      |        |
| ATOM | 4686 | CG1 | VAL | X | 438A | 2.953  | -78.168 | 48.180 | 1.00 | 0.00   |
| C    |      |     |     |   |      |        |         |        |      |        |
| ATOM | 4687 | CG2 | VAL | X | 438A | 1.281  | -80.011 | 48.391 | 1.00 | 0.00   |
| C    |      |     |     |   |      |        |         |        |      |        |
| ATOM | 4688 | N   | ILE | X | 439A | 5.543  | -79.736 | 50.700 | 1.00 | 114.70 |
| N    |      |     |     |   |      |        |         |        |      |        |

|      |      |     |            |        |         |        |            |
|------|------|-----|------------|--------|---------|--------|------------|
| ATOM | 4689 | CA  | ILE X 439A | 6.875  | -79.088 | 50.843 | 1.00109.68 |
| C    |      |     |            |        |         |        |            |
| ATOM | 4690 | C   | ILE X 439A | 7.009  | -77.796 | 49.949 | 1.00115.60 |
| C    |      |     |            |        |         |        |            |
| ATOM | 4691 | O   | ILE X 439A | 6.391  | -77.713 | 48.889 | 1.00124.98 |
| O    |      |     |            |        |         |        |            |
| ATOM | 4692 | CB  | ILE X 439A | 8.016  | -80.105 | 50.557 | 1.00 0.00  |
| C    |      |     |            |        |         |        |            |
| ATOM | 4693 | CG2 | ILE X 439A | 8.077  | -80.541 | 49.080 | 1.00 0.00  |
| C    |      |     |            |        |         |        |            |
| ATOM | 4694 | CG1 | ILE X 439A | 9.366  | -79.532 | 51.048 | 1.00 0.00  |
| C    |      |     |            |        |         |        |            |
| ATOM | 4695 | CD1 | ILE X 439A | 10.530 | -80.527 | 50.999 | 1.00 0.00  |
| C    |      |     |            |        |         |        |            |
| ATOM | 4696 | N   | LEU X 440A | 7.722  | -76.759 | 50.419 | 1.00116.83 |
| N    |      |     |            |        |         |        |            |
| ATOM | 4697 | CA  | LEU X 440A | 8.193  | -75.661 | 49.539 | 1.00109.60 |
| C    |      |     |            |        |         |        |            |
| ATOM | 4698 | C   | LEU X 440A | 9.731  | -75.588 | 49.671 | 1.00119.05 |
| C    |      |     |            |        |         |        |            |
| ATOM | 4699 | O   | LEU X 440A | 10.241 | -75.602 | 50.775 | 1.00144.06 |
| O    |      |     |            |        |         |        |            |
| ATOM | 4700 | CB  | LEU X 440A | 7.491  | -74.336 | 49.909 | 1.00 0.00  |
| C    |      |     |            |        |         |        |            |
| ATOM | 4701 | CG  | LEU X 440A | 7.881  | -73.138 | 49.013 | 1.00 0.00  |
| C    |      |     |            |        |         |        |            |
| ATOM | 4702 | CD1 | LEU X 440A | 7.483  | -73.347 | 47.542 | 1.00 0.00  |
| C    |      |     |            |        |         |        |            |
| ATOM | 4703 | CD2 | LEU X 440A | 7.220  | -71.854 | 49.540 | 1.00 0.00  |
| C    |      |     |            |        |         |        |            |
| ATOM | 4704 | N   | CYX X 441A | 10.477 | -75.582 | 48.563 | 1.00124.19 |
| N    |      |     |            |        |         |        |            |
| ATOM | 4705 | CA  | CYX X 441A | 11.980 | -75.541 | 48.619 | 1.00120.87 |
| C    |      |     |            |        |         |        |            |
| ATOM | 4706 | C   | CYX X 441A | 12.435 | -74.224 | 49.343 | 1.00125.45 |
| C    |      |     |            |        |         |        |            |
| ATOM | 4707 | O   | CYX X 441A | 11.752 | -73.197 | 49.233 | 1.00130.19 |
| O    |      |     |            |        |         |        |            |
| ATOM | 4708 | CB  | CYX X 441A | 12.595 | -75.591 | 47.170 | 1.00 0.00  |
| C    |      |     |            |        |         |        |            |
| ATOM | 4709 | SG  | CYX X 441A | 14.282 | -76.263 | 47.217 | 1.00 0.00  |
| S    |      |     |            |        |         |        |            |
| ATOM | 4710 | N   | LEU X 442A | 13.537 | -74.257 | 50.111 | 1.00121.00 |
| N    |      |     |            |        |         |        |            |
| ATOM | 4711 | CA  | LEU X 442A | 13.970 | -73.062 | 50.913 | 1.00114.82 |
| C    |      |     |            |        |         |        |            |
| ATOM | 4712 | C   | LEU X 442A | 15.294 | -72.407 | 50.399 | 1.00107.78 |
| C    |      |     |            |        |         |        |            |
| ATOM | 4713 | OXT | LEU X 442A | 16.351 | -72.781 | 50.964 | 1.00107.78 |
| O1-  |      |     |            |        |         |        |            |
| ATOM | 4714 | O   | LEU X 442A | 15.296 | -71.540 | 49.494 | 1.00 97.58 |
| O    |      |     |            |        |         |        |            |
| ATOM | 4715 | CB  | LEU X 442A | 14.173 | -73.474 | 52.411 | 1.00 0.00  |
| C    |      |     |            |        |         |        |            |

|        |      |     |            |        |          |        |      |        |
|--------|------|-----|------------|--------|----------|--------|------|--------|
| ATOM   | 4716 | CG  | LEU X 442A | 14.527 | -72.321  | 53.379 | 1.00 | 0.00   |
| C      |      |     |            |        |          |        |      |        |
| ATOM   | 4717 | CD1 | LEU X 442A | 13.421 | -71.254  | 53.455 | 1.00 | 0.00   |
| C      |      |     |            |        |          |        |      |        |
| ATOM   | 4718 | CD2 | LEU X 442A | 14.791 | -72.880  | 54.786 | 1.00 | 0.00   |
| C      |      |     |            |        |          |        |      |        |
| HETATM | 4719 | ZN  | ZN X 443A  | 0.241  | -97.057  | 45.945 | 1.00 | 191.76 |
| ZN2+   |      |     |            |        |          |        |      |        |
| HETATM | 4720 | C1  | 85C X 444A | 9.892  | -104.066 | 28.442 | 1.00 | 74.72  |
| C      |      |     |            |        |          |        |      |        |
| HETATM | 4721 | C2  | 85C X 444A | 10.699 | -105.211 | 28.433 | 1.00 | 92.33  |
| C      |      |     |            |        |          |        |      |        |
| HETATM | 4722 | C3  | 85C X 444A | 11.862 | -105.245 | 29.208 | 1.00 | 91.86  |
| C      |      |     |            |        |          |        |      |        |
| HETATM | 4723 | C4  | 85C X 444A | 10.226 | -102.979 | 29.245 | 1.00 | 70.69  |
| C      |      |     |            |        |          |        |      |        |
| HETATM | 4724 | C5  | 85C X 444A | 11.366 | -103.045 | 30.044 | 1.00 | 85.14  |
| C      |      |     |            |        |          |        |      |        |
| HETATM | 4725 | C6  | 85C X 444A | 12.183 | -104.153 | 30.003 | 1.00 | 85.29  |
| C      |      |     |            |        |          |        |      |        |
| HETATM | 4726 | N1  | 85C X 444A | 13.048 | -102.629 | 31.502 | 1.00 | 95.36  |
| N      |      |     |            |        |          |        |      |        |
| HETATM | 4727 | N2  | 85C X 444A | 16.443 | -101.845 | 32.525 | 1.00 | 91.63  |
| N      |      |     |            |        |          |        |      |        |
| HETATM | 4728 | N3  | 85C X 444A | 11.320 | -106.617 | 26.648 | 1.00 | 132.79 |
| N      |      |     |            |        |          |        |      |        |
| HETATM | 4729 | O1  | 85C X 444A | 11.462 | -100.997 | 31.329 | 1.00 | 76.58  |
| O      |      |     |            |        |          |        |      |        |
| HETATM | 4730 | C7  | 85C X 444A | 13.348 | -103.984 | 30.949 | 1.00 | 94.04  |
| C      |      |     |            |        |          |        |      |        |
| HETATM | 4731 | C8  | 85C X 444A | 11.889 | -102.107 | 31.004 | 1.00 | 90.57  |
| C      |      |     |            |        |          |        |      |        |
| HETATM | 4732 | C9  | 85C X 444A | 13.926 | -101.918 | 32.451 | 1.00 | 92.73  |
| C      |      |     |            |        |          |        |      |        |
| HETATM | 4733 | C10 | 85C X 444A | 14.112 | -102.846 | 33.667 | 1.00 | 108.48 |
| C      |      |     |            |        |          |        |      |        |
| HETATM | 4734 | C11 | 85C X 444A | 15.112 | -102.150 | 34.609 | 1.00 | 109.24 |
| C      |      |     |            |        |          |        |      |        |
| HETATM | 4735 | C12 | 85C X 444A | 16.432 | -102.087 | 33.865 | 1.00 | 94.39  |
| C      |      |     |            |        |          |        |      |        |
| HETATM | 4736 | C13 | 85C X 444A | 15.301 | -101.679 | 31.802 | 1.00 | 88.11  |
| C      |      |     |            |        |          |        |      |        |
| HETATM | 4737 | C14 | 85C X 444A | 10.284 | -106.435 | 27.645 | 1.00 | 115.09 |
| C      |      |     |            |        |          |        |      |        |
| HETATM | 4738 | C15 | 85C X 444A | 11.185 | -106.259 | 25.362 | 1.00 | 133.93 |
| C      |      |     |            |        |          |        |      |        |
| HETATM | 4739 | O2  | 85C X 444A | 15.443 | -101.340 | 30.645 | 1.00 | 116.95 |
| O      |      |     |            |        |          |        |      |        |
| HETATM | 4740 | C17 | 85C X 444A | 11.780 | -106.974 | 22.483 | 1.00 | 160.22 |
| C      |      |     |            |        |          |        |      |        |
| HETATM | 4741 | C18 | 85C X 444A | 12.114 | -107.064 | 21.134 | 1.00 | 185.44 |
| C      |      |     |            |        |          |        |      |        |
| HETATM | 4742 | CL1 | 85C X 444A | 11.222 | -108.164 | 20.146 | 1.00 | 235.51 |
| CL     |      |     |            |        |          |        |      |        |

|        |      |     |     |   |      |                |        |            |
|--------|------|-----|-----|---|------|----------------|--------|------------|
| HETATM | 4743 | C19 | 85C | X | 444A | 13.185-106.324 | 20.606 | 1.00210.86 |
| C      |      |     |     |   |      |                |        |            |
| HETATM | 4744 | C22 | 85C | X | 444A | 13.557-106.415 | 19.137 | 1.00211.92 |
| C      |      |     |     |   |      |                |        |            |
| HETATM | 4745 | C20 | 85C | X | 444A | 13.939-105.521 | 21.463 | 1.00178.84 |
| C      |      |     |     |   |      |                |        |            |
| HETATM | 4746 | C21 | 85C | X | 444A | 13.645-105.464 | 22.821 | 1.00149.64 |
| C      |      |     |     |   |      |                |        |            |
| HETATM | 4747 | C16 | 85C | X | 444A | 12.572-106.199 | 23.322 | 1.00144.90 |
| C      |      |     |     |   |      |                |        |            |
| HETATM | 4748 | N4  | 85C | X | 444A | 12.367-106.214 | 24.709 | 1.00131.01 |
| N      |      |     |     |   |      |                |        |            |
| HETATM | 4749 | O4  | 85C | X | 444A | 10.110-105.952 | 24.851 | 1.00130.08 |
| O      |      |     |     |   |      |                |        |            |
| HETATM | 4750 | O3  | 85C | X | 444A | 17.500-102.256 | 34.402 | 1.00 91.61 |
| O      |      |     |     |   |      |                |        |            |
| TER    | 4751 |     | 85C | X | 444  |                |        |            |
| ATOM   | 4752 | CH3 | ACE |   | 1    | 31.016-122.895 | 16.165 | 1.00 0.00  |
| C      |      |     |     |   |      |                |        |            |
| ATOM   | 4753 | C   | ACE |   | 1    | 31.213-122.158 | 14.873 | 1.00 0.00  |
| C      |      |     |     |   |      |                |        |            |
| ATOM   | 4754 | O   | ACE |   | 1    | 30.772-120.984 | 14.745 | 1.00 0.00  |
| O      |      |     |     |   |      |                |        |            |
| ATOM   | 4755 | N   | ILE |   | 2    | 31.745-122.843 | 13.860 | 1.00 0.00  |
| N      |      |     |     |   |      |                |        |            |
| ATOM   | 4756 | CA  | ILE |   | 2    | 31.661-122.316 | 12.445 | 1.00 0.00  |
| C      |      |     |     |   |      |                |        |            |
| ATOM   | 4757 | CB  | ILE |   | 2    | 32.567-123.105 | 11.442 | 1.00 0.00  |
| C      |      |     |     |   |      |                |        |            |
| ATOM   | 4758 | CG2 | ILE |   | 2    | 32.261-122.539 | 10.039 | 1.00 0.00  |
| C      |      |     |     |   |      |                |        |            |
| ATOM   | 4759 | CG1 | ILE |   | 2    | 34.084-122.883 | 11.755 | 1.00 0.00  |
| C      |      |     |     |   |      |                |        |            |
| ATOM   | 4760 | CD1 | ILE |   | 2    | 34.843-124.232 | 11.594 | 1.00 0.00  |
| C      |      |     |     |   |      |                |        |            |
| ATOM   | 4761 | C   | ILE |   | 2    | 30.223-122.403 | 11.993 | 1.00 0.00  |
| C      |      |     |     |   |      |                |        |            |
| ATOM   | 4762 | O   | ILE |   | 2    | 29.613-123.496 | 12.045 | 1.00 0.00  |
| O      |      |     |     |   |      |                |        |            |
| ATOM   | 4763 | N   | ARG |   | 3    | 29.661-121.306 | 11.396 | 1.00 0.00  |
| N      |      |     |     |   |      |                |        |            |
| ATOM   | 4764 | CA  | ARG |   | 3    | 28.466-121.418 | 10.523 | 1.00 0.00  |
| C      |      |     |     |   |      |                |        |            |
| ATOM   | 4765 | CB  | ARG |   | 3    | 27.254-120.888 | 11.301 | 1.00 0.00  |
| C      |      |     |     |   |      |                |        |            |
| ATOM   | 4766 | CG  | ARG |   | 3    | 26.676-121.726 | 12.437 | 1.00 0.00  |
| C      |      |     |     |   |      |                |        |            |
| ATOM   | 4767 | CD  | ARG |   | 3    | 27.261-121.449 | 13.840 | 1.00 0.00  |
| C      |      |     |     |   |      |                |        |            |
| ATOM   | 4768 | NE  | ARG |   | 3    | 26.816-122.383 | 14.924 | 1.00 0.00  |
| N      |      |     |     |   |      |                |        |            |
| ATOM   | 4769 | CZ  | ARG |   | 3    | 27.393-123.529 | 15.184 | 1.00 0.00  |
| C      |      |     |     |   |      |                |        |            |

|      |      |     |     |   |                |        |      |      |
|------|------|-----|-----|---|----------------|--------|------|------|
| ATOM | 4770 | NH1 | ARG | 3 | 28.343-124.005 | 14.431 | 1.00 | 0.00 |
| N    |      |     |     |   |                |        |      |      |
| ATOM | 4771 | NH2 | ARG | 3 | 26.917-124.204 | 16.167 | 1.00 | 0.00 |
| N1+  |      |     |     |   |                |        |      |      |
| ATOM | 4772 | C   | ARG | 3 | 28.534-120.608 | 9.190  | 1.00 | 0.00 |
| C    |      |     |     |   |                |        |      |      |
| ATOM | 4773 | O   | ARG | 3 | 29.015-119.507 | 9.208  | 1.00 | 0.00 |
| O    |      |     |     |   |                |        |      |      |
| ATOM | 4774 | N   | LEU | 4 | 28.085-121.176 | 8.076  | 1.00 | 0.00 |
| N    |      |     |     |   |                |        |      |      |
| ATOM | 4775 | CA  | LEU | 4 | 27.688-120.441 | 6.824  | 1.00 | 0.00 |
| C    |      |     |     |   |                |        |      |      |
| ATOM | 4776 | CB  | LEU | 4 | 28.762-120.523 | 5.675  | 1.00 | 0.00 |
| C    |      |     |     |   |                |        |      |      |
| ATOM | 4777 | CG  | LEU | 4 | 28.398-119.916 | 4.285  | 1.00 | 0.00 |
| C    |      |     |     |   |                |        |      |      |
| ATOM | 4778 | CD1 | LEU | 4 | 29.644-119.230 | 3.702  | 1.00 | 0.00 |
| C    |      |     |     |   |                |        |      |      |
| ATOM | 4779 | CD2 | LEU | 4 | 27.906-120.917 | 3.191  | 1.00 | 0.00 |
| C    |      |     |     |   |                |        |      |      |
| ATOM | 4780 | C   | LEU | 4 | 26.311-120.918 | 6.266  | 1.00 | 0.00 |
| C    |      |     |     |   |                |        |      |      |
| ATOM | 4781 | O   | LEU | 4 | 26.251-122.045 | 5.736  | 1.00 | 0.00 |
| O    |      |     |     |   |                |        |      |      |
| ATOM | 4782 | N   | PRO | 5 | 25.248-120.141 | 6.454  | 1.00 | 0.00 |
| N    |      |     |     |   |                |        |      |      |
| ATOM | 4783 | CD  | PRO | 5 | 25.082-119.008 | 7.354  | 1.00 | 0.00 |
| C    |      |     |     |   |                |        |      |      |
| ATOM | 4784 | CG  | PRO | 5 | 23.736-119.238 | 8.000  | 1.00 | 0.00 |
| C    |      |     |     |   |                |        |      |      |
| ATOM | 4785 | CB  | PRO | 5 | 22.906-119.608 | 6.783  | 1.00 | 0.00 |
| C    |      |     |     |   |                |        |      |      |
| ATOM | 4786 | CA  | PRO | 5 | 23.901-120.429 | 5.989  | 1.00 | 0.00 |
| C    |      |     |     |   |                |        |      |      |
| ATOM | 4787 | C   | PRO | 5 | 23.798-120.342 | 4.440  | 1.00 | 0.00 |
| C    |      |     |     |   |                |        |      |      |
| ATOM | 4788 | O   | PRO | 5 | 24.383-119.485 | 3.837  | 1.00 | 0.00 |
| O    |      |     |     |   |                |        |      |      |
| ATOM | 4789 | N   | ILE | 6 | 23.200-121.297 | 3.744  | 1.00 | 0.00 |
| N    |      |     |     |   |                |        |      |      |
| ATOM | 4790 | CA  | ILE | 6 | 22.953-121.318 | 2.326  | 1.00 | 0.00 |
| C    |      |     |     |   |                |        |      |      |
| ATOM | 4791 | CB  | ILE | 6 | 22.866-122.757 | 1.814  | 1.00 | 0.00 |
| C    |      |     |     |   |                |        |      |      |
| ATOM | 4792 | CG2 | ILE | 6 | 22.476-122.850 | 0.297  | 1.00 | 0.00 |
| C    |      |     |     |   |                |        |      |      |
| ATOM | 4793 | CG1 | ILE | 6 | 24.315-123.427 | 1.988  | 1.00 | 0.00 |
| C    |      |     |     |   |                |        |      |      |
| ATOM | 4794 | CD1 | ILE | 6 | 24.181-124.960 | 1.995  | 1.00 | 0.00 |
| C    |      |     |     |   |                |        |      |      |
| ATOM | 4795 | C   | ILE | 6 | 21.748-120.452 | 1.971  | 1.00 | 0.00 |
| C    |      |     |     |   |                |        |      |      |
| ATOM | 4796 | O   | ILE | 6 | 20.814-120.321 | 2.803  | 1.00 | 0.00 |
| O    |      |     |     |   |                |        |      |      |

|      |      |     |     |    |                |        |      |      |
|------|------|-----|-----|----|----------------|--------|------|------|
| ATOM | 4797 | N   | VAL | 7  | 21.740-119.786 | 0.822  | 1.00 | 0.00 |
| N    |      |     |     |    |                |        |      |      |
| ATOM | 4798 | CA  | VAL | 7  | 20.521-119.086 | 0.339  | 1.00 | 0.00 |
| C    |      |     |     |    |                |        |      |      |
| ATOM | 4799 | CB  | VAL | 7  | 20.749-117.607 | 0.700  | 1.00 | 0.00 |
| C    |      |     |     |    |                |        |      |      |
| ATOM | 4800 | CG1 | VAL | 7  | 21.829-116.851 | -0.069 | 1.00 | 0.00 |
| C    |      |     |     |    |                |        |      |      |
| ATOM | 4801 | CG2 | VAL | 7  | 19.429-116.808 | 0.515  | 1.00 | 0.00 |
| C    |      |     |     |    |                |        |      |      |
| ATOM | 4802 | C   | VAL | 7  | 20.314-119.279 | -1.147 | 1.00 | 0.00 |
| C    |      |     |     |    |                |        |      |      |
| ATOM | 4803 | O   | VAL | 7  | 19.240-118.913 | -1.605 | 1.00 | 0.00 |
| O    |      |     |     |    |                |        |      |      |
| ATOM | 4804 | N   | ASP | 8  | 21.217-119.843 | -1.943 | 1.00 | 0.00 |
| N    |      |     |     |    |                |        |      |      |
| ATOM | 4805 | CA  | ASP | 8  | 20.957-120.322 | -3.305 | 1.00 | 0.00 |
| C    |      |     |     |    |                |        |      |      |
| ATOM | 4806 | CB  | ASP | 8  | 20.898-119.186 | -4.314 | 1.00 | 0.00 |
| C    |      |     |     |    |                |        |      |      |
| ATOM | 4807 | CG  | ASP | 8  | 20.134-119.616 | -5.573 | 1.00 | 0.00 |
| C    |      |     |     |    |                |        |      |      |
| ATOM | 4808 | OD1 | ASP | 8  | 19.523-120.702 | -5.680 | 1.00 | 0.00 |
| O    |      |     |     |    |                |        |      |      |
| ATOM | 4809 | OD2 | ASP | 8  | 20.301-118.984 | -6.654 | 1.00 | 0.00 |
| O1-  |      |     |     |    |                |        |      |      |
| ATOM | 4810 | C   | ASP | 8  | 22.078-121.424 | -3.652 | 1.00 | 0.00 |
| C    |      |     |     |    |                |        |      |      |
| ATOM | 4811 | O   | ASP | 8  | 23.204-121.381 | -3.156 | 1.00 | 0.00 |
| O    |      |     |     |    |                |        |      |      |
| ATOM | 4812 | N   | LYS | 9  | 21.713-122.404 | -4.418 | 1.00 | 0.00 |
| N    |      |     |     |    |                |        |      |      |
| ATOM | 4813 | CA  | LYS | 9  | 22.594-123.511 | -4.815 | 1.00 | 0.00 |
| C    |      |     |     |    |                |        |      |      |
| ATOM | 4814 | CB  | LYS | 9  | 22.259-124.655 | -3.857 | 1.00 | 0.00 |
| C    |      |     |     |    |                |        |      |      |
| ATOM | 4815 | CG  | LYS | 9  | 20.919-125.406 | -4.148 | 1.00 | 0.00 |
| C    |      |     |     |    |                |        |      |      |
| ATOM | 4816 | CD  | LYS | 9  | 19.671-124.533 | -4.467 | 1.00 | 0.00 |
| C    |      |     |     |    |                |        |      |      |
| ATOM | 4817 | CE  | LYS | 9  | 18.302-125.225 | -4.641 | 1.00 | 0.00 |
| C    |      |     |     |    |                |        |      |      |
| ATOM | 4818 | NZ  | LYS | 9  | 17.211-124.345 | -5.041 | 1.00 | 0.00 |
| N1+  |      |     |     |    |                |        |      |      |
| ATOM | 4819 | C   | LYS | 9  | 22.517-123.856 | -6.360 | 1.00 | 0.00 |
| C    |      |     |     |    |                |        |      |      |
| ATOM | 4820 | O   | LYS | 9  | 21.653-123.463 | -7.116 | 1.00 | 0.00 |
| O    |      |     |     |    |                |        |      |      |
| ATOM | 4821 | N   | TYR | 10 | 23.663-124.407 | -6.754 | 1.00 | 0.00 |
| N    |      |     |     |    |                |        |      |      |
| ATOM | 4822 | CA  | TYR | 10 | 23.972-124.825 | -8.129 | 1.00 | 0.00 |
| C    |      |     |     |    |                |        |      |      |
| ATOM | 4823 | CB  | TYR | 10 | 24.787-123.712 | -8.831 | 1.00 | 0.00 |
| C    |      |     |     |    |                |        |      |      |

|      |      |     |     |    |                |         |      |      |
|------|------|-----|-----|----|----------------|---------|------|------|
| ATOM | 4824 | CG  | TYR | 10 | 24.503-122.276 | -8.335  | 1.00 | 0.00 |
| C    |      |     |     |    |                |         |      |      |
| ATOM | 4825 | CD1 | TYR | 10 | 23.567-121.465 | -9.080  | 1.00 | 0.00 |
| C    |      |     |     |    |                |         |      |      |
| ATOM | 4826 | CE1 | TYR | 10 | 23.375-120.126 | -8.646  | 1.00 | 0.00 |
| C    |      |     |     |    |                |         |      |      |
| ATOM | 4827 | CZ  | TYR | 10 | 23.972-119.566 | -7.513  | 1.00 | 0.00 |
| C    |      |     |     |    |                |         |      |      |
| ATOM | 4828 | OH  | TYR | 10 | 23.583-118.270 | -7.176  | 1.00 | 0.00 |
| O    |      |     |     |    |                |         |      |      |
| ATOM | 4829 | CE2 | TYR | 10 | 24.985-120.263 | -6.861  | 1.00 | 0.00 |
| C    |      |     |     |    |                |         |      |      |
| ATOM | 4830 | CD2 | TYR | 10 | 25.228-121.625 | -7.266  | 1.00 | 0.00 |
| C    |      |     |     |    |                |         |      |      |
| ATOM | 4831 | C   | TYR | 10 | 24.701-126.173 | -8.149  | 1.00 | 0.00 |
| C    |      |     |     |    |                |         |      |      |
| ATOM | 4832 | O   | TYR | 10 | 25.467-126.551 | -7.260  | 1.00 | 0.00 |
| O    |      |     |     |    |                |         |      |      |
| ATOM | 4833 | N   | LYS | 11 | 24.568-126.922 | -9.285  | 1.00 | 0.00 |
| N    |      |     |     |    |                |         |      |      |
| ATOM | 4834 | CA  | LYS | 11 | 25.324-128.132 | -9.647  | 1.00 | 0.00 |
| C    |      |     |     |    |                |         |      |      |
| ATOM | 4835 | CB  | LYS | 11 | 24.479-129.391 | -9.193  | 1.00 | 0.00 |
| C    |      |     |     |    |                |         |      |      |
| ATOM | 4836 | CG  | LYS | 11 | 24.488-129.617 | -7.694  | 1.00 | 0.00 |
| C    |      |     |     |    |                |         |      |      |
| ATOM | 4837 | CD  | LYS | 11 | 23.763-130.954 | -7.336  | 1.00 | 0.00 |
| C    |      |     |     |    |                |         |      |      |
| ATOM | 4838 | CE  | LYS | 11 | 23.608-131.043 | -5.796  | 1.00 | 0.00 |
| C    |      |     |     |    |                |         |      |      |
| ATOM | 4839 | NZ  | LYS | 11 | 22.654-132.164 | -5.485  | 1.00 | 0.00 |
| N1+  |      |     |     |    |                |         |      |      |
| ATOM | 4840 | C   | LYS | 11 | 25.646-128.297 | -11.153 | 1.00 | 0.00 |
| C    |      |     |     |    |                |         |      |      |
| ATOM | 4841 | O   | LYS | 11 | 26.363-129.204 | -11.537 | 1.00 | 0.00 |
| O    |      |     |     |    |                |         |      |      |
| ATOM | 4842 | N   | ASP | 12 | 25.053-127.485 | -11.936 | 1.00 | 0.00 |
| N    |      |     |     |    |                |         |      |      |
| ATOM | 4843 | CA  | ASP | 12 | 25.395-127.386 | -13.349 | 1.00 | 0.00 |
| C    |      |     |     |    |                |         |      |      |
| ATOM | 4844 | CB  | ASP | 12 | 24.727-126.163 | -13.986 | 1.00 | 0.00 |
| C    |      |     |     |    |                |         |      |      |
| ATOM | 4845 | CG  | ASP | 12 | 23.217-126.376 | -14.139 | 1.00 | 0.00 |
| C    |      |     |     |    |                |         |      |      |
| ATOM | 4846 | OD1 | ASP | 12 | 22.428-125.389 | -14.060 | 1.00 | 0.00 |
| O    |      |     |     |    |                |         |      |      |
| ATOM | 4847 | OD2 | ASP | 12 | 22.718-127.519 | -14.133 | 1.00 | 0.00 |
| O1-  |      |     |     |    |                |         |      |      |
| ATOM | 4848 | C   | ASP | 12 | 26.920-127.255 | -13.411 | 1.00 | 0.00 |
| C    |      |     |     |    |                |         |      |      |
| ATOM | 4849 | O   | ASP | 12 | 27.479-126.250 | -13.010 | 1.00 | 0.00 |
| O    |      |     |     |    |                |         |      |      |
| ATOM | 4850 | N   | MET | 13 | 27.561-128.291 | -14.020 | 1.00 | 0.00 |
| N    |      |     |     |    |                |         |      |      |

|      |      |     |     |    |                |         |      |      |
|------|------|-----|-----|----|----------------|---------|------|------|
| ATOM | 4851 | CA  | MET | 13 | 28.977-128.431 | -14.147 | 1.00 | 0.00 |
| C    |      |     |     |    |                |         |      |      |
| ATOM | 4852 | CB  | MET | 13 | 29.456-127.558 | -15.254 | 1.00 | 0.00 |
| C    |      |     |     |    |                |         |      |      |
| ATOM | 4853 | CG  | MET | 13 | 30.847-127.927 | -15.783 | 1.00 | 0.00 |
| C    |      |     |     |    |                |         |      |      |
| ATOM | 4854 | SD  | MET | 13 | 31.066-129.679 | -16.332 | 1.00 | 0.00 |
| S    |      |     |     |    |                |         |      |      |
| ATOM | 4855 | CE  | MET | 13 | 29.707-129.951 | -17.520 | 1.00 | 0.00 |
| C    |      |     |     |    |                |         |      |      |
| ATOM | 4856 | C   | MET | 13 | 29.800-128.365 | -12.911 | 1.00 | 0.00 |
| C    |      |     |     |    |                |         |      |      |
| ATOM | 4857 | O   | MET | 13 | 30.945-127.880 | -12.962 | 1.00 | 0.00 |
| O    |      |     |     |    |                |         |      |      |
| ATOM | 4858 | N   | GLY | 14 | 29.366-128.930 | -11.783 | 1.00 | 0.00 |
| N    |      |     |     |    |                |         |      |      |
| ATOM | 4859 | CA  | GLY | 14 | 30.013-129.086 | -10.551 | 1.00 | 0.00 |
| C    |      |     |     |    |                |         |      |      |
| ATOM | 4860 | C   | GLY | 14 | 29.364-128.291 | -9.429  | 1.00 | 0.00 |
| C    |      |     |     |    |                |         |      |      |
| ATOM | 4861 | O   | GLY | 14 | 28.671-127.301 | -9.685  | 1.00 | 0.00 |
| O    |      |     |     |    |                |         |      |      |
| ATOM | 4862 | N   | THR | 15 | 29.413-128.720 | -8.167  | 1.00 | 0.00 |
| N    |      |     |     |    |                |         |      |      |
| ATOM | 4863 | CA  | THR | 15 | 28.729-128.044 | -7.061  | 1.00 | 0.00 |
| C    |      |     |     |    |                |         |      |      |
| ATOM | 4864 | CB  | THR | 15 | 28.797-128.865 | -5.846  | 1.00 | 0.00 |
| C    |      |     |     |    |                |         |      |      |
| ATOM | 4865 | CG2 | THR | 15 | 27.721-128.366 | -4.796  | 1.00 | 0.00 |
| C    |      |     |     |    |                |         |      |      |
| ATOM | 4866 | OG1 | THR | 15 | 28.444-130.173 | -6.022  | 1.00 | 0.00 |
| O    |      |     |     |    |                |         |      |      |
| ATOM | 4867 | C   | THR | 15 | 29.308-126.681 | -6.700  | 1.00 | 0.00 |
| C    |      |     |     |    |                |         |      |      |
| ATOM | 4868 | O   | THR | 15 | 30.521-126.512 | -6.609  | 1.00 | 0.00 |
| O    |      |     |     |    |                |         |      |      |
| ATOM | 4869 | N   | VAL | 16 | 28.386-125.808 | -6.512  | 1.00 | 0.00 |
| N    |      |     |     |    |                |         |      |      |
| ATOM | 4870 | CA  | VAL | 16 | 28.552-124.409 | -6.041  | 1.00 | 0.00 |
| C    |      |     |     |    |                |         |      |      |
| ATOM | 4871 | CB  | VAL | 16 | 28.636-123.344 | -7.158  | 1.00 | 0.00 |
| C    |      |     |     |    |                |         |      |      |
| ATOM | 4872 | CG1 | VAL | 16 | 29.112-122.077 | -6.433  | 1.00 | 0.00 |
| C    |      |     |     |    |                |         |      |      |
| ATOM | 4873 | CG2 | VAL | 16 | 29.726-123.536 | -8.212  | 1.00 | 0.00 |
| C    |      |     |     |    |                |         |      |      |
| ATOM | 4874 | C   | VAL | 16 | 27.433-124.109 | -5.054  | 1.00 | 0.00 |
| C    |      |     |     |    |                |         |      |      |
| ATOM | 4875 | O   | VAL | 16 | 26.296-124.446 | -5.301  | 1.00 | 0.00 |
| O    |      |     |     |    |                |         |      |      |
| ATOM | 4876 | N   | VAL | 17 | 27.655-123.256 | -4.068  | 1.00 | 0.00 |
| N    |      |     |     |    |                |         |      |      |
| ATOM | 4877 | CA  | VAL | 17 | 26.502-122.671 | -3.264  | 1.00 | 0.00 |
| C    |      |     |     |    |                |         |      |      |



|      |      |     |     |    |                |        |      |      |
|------|------|-----|-----|----|----------------|--------|------|------|
| ATOM | 4878 | CB  | VAL | 17 | 26.193-123.491 | -2.048 | 1.00 | 0.00 |
| C    |      |     |     |    |                |        |      |      |
| ATOM | 4879 | CG1 | VAL | 17 | 25.996-124.964 | -2.356 | 1.00 | 0.00 |
| C    |      |     |     |    |                |        |      |      |
| ATOM | 4880 | CG2 | VAL | 17 | 27.315-123.523 | -1.020 | 1.00 | 0.00 |
| C    |      |     |     |    |                |        |      |      |
| ATOM | 4881 | C   | VAL | 17 | 26.771-121.189 | -2.948 | 1.00 | 0.00 |
| C    |      |     |     |    |                |        |      |      |
| ATOM | 4882 | O   | VAL | 17 | 27.874-120.742 | -2.928 | 1.00 | 0.00 |
| O    |      |     |     |    |                |        |      |      |
| ATOM | 4883 | N   | LEU | 18 | 25.734-120.365 | -2.708 | 1.00 | 0.00 |
| N    |      |     |     |    |                |        |      |      |
| ATOM | 4884 | CA  | LEU | 18 | 25.773-118.932 | -2.300 | 1.00 | 0.00 |
| C    |      |     |     |    |                |        |      |      |
| ATOM | 4885 | CB  | LEU | 18 | 24.781-118.221 | -3.169 | 1.00 | 0.00 |
| C    |      |     |     |    |                |        |      |      |
| ATOM | 4886 | CG  | LEU | 18 | 24.529-116.712 | -2.919 | 1.00 | 0.00 |
| C    |      |     |     |    |                |        |      |      |
| ATOM | 4887 | CD1 | LEU | 18 | 25.777-115.797 | -2.933 | 1.00 | 0.00 |
| C    |      |     |     |    |                |        |      |      |
| ATOM | 4888 | CD2 | LEU | 18 | 23.639-116.275 | -4.125 | 1.00 | 0.00 |
| C    |      |     |     |    |                |        |      |      |
| ATOM | 4889 | C   | LEU | 18 | 25.352-118.717 | -0.887 | 1.00 | 0.00 |
| C    |      |     |     |    |                |        |      |      |
| ATOM | 4890 | O   | LEU | 18 | 24.451-119.388 | -0.376 | 1.00 | 0.00 |
| O    |      |     |     |    |                |        |      |      |
| ATOM | 4891 | N   | GLY | 19 | 26.071-117.813 | -0.244 | 1.00 | 0.00 |
| N    |      |     |     |    |                |        |      |      |
| ATOM | 4892 | CA  | GLY | 19 | 25.817-117.677 | 1.198  | 1.00 | 0.00 |
| C    |      |     |     |    |                |        |      |      |
| ATOM | 4893 | C   | GLY | 19 | 26.956-116.864 | 1.896  | 1.00 | 0.00 |
| C    |      |     |     |    |                |        |      |      |
| ATOM | 4894 | O   | GLY | 19 | 28.027-116.605 | 1.366  | 1.00 | 0.00 |
| O    |      |     |     |    |                |        |      |      |
| ATOM | 4895 | N   | LYS | 20 | 26.615-116.278 | 3.053  | 1.00 | 0.00 |
| N    |      |     |     |    |                |        |      |      |
| ATOM | 4896 | CA  | LYS | 20 | 27.476-115.443 | 3.907  | 1.00 | 0.00 |
| C    |      |     |     |    |                |        |      |      |
| ATOM | 4897 | CB  | LYS | 20 | 26.596-114.357 | 4.427  | 1.00 | 0.00 |
| C    |      |     |     |    |                |        |      |      |
| ATOM | 4898 | CG  | LYS | 20 | 27.379-113.141 | 4.951  | 1.00 | 0.00 |
| C    |      |     |     |    |                |        |      |      |
| ATOM | 4899 | CD  | LYS | 20 | 26.542-112.259 | 5.863  | 1.00 | 0.00 |
| C    |      |     |     |    |                |        |      |      |
| ATOM | 4900 | CE  | LYS | 20 | 26.413-113.046 | 7.184  | 1.00 | 0.00 |
| C    |      |     |     |    |                |        |      |      |
| ATOM | 4901 | NZ  | LYS | 20 | 25.540-112.417 | 8.231  | 1.00 | 0.00 |
| N1+  |      |     |     |    |                |        |      |      |
| ATOM | 4902 | C   | LYS | 20 | 28.031-116.248 | 5.081  | 1.00 | 0.00 |
| C    |      |     |     |    |                |        |      |      |
| ATOM | 4903 | O   | LYS | 20 | 27.253-116.877 | 5.733  | 1.00 | 0.00 |
| O    |      |     |     |    |                |        |      |      |
| ATOM | 4904 | N   | LEU | 21 | 29.308-116.100 | 5.381  | 1.00 | 0.00 |
| N    |      |     |     |    |                |        |      |      |

|      |      |     |     |    |                |        |      |      |
|------|------|-----|-----|----|----------------|--------|------|------|
| ATOM | 4905 | CA  | LEU | 21 | 30.016-116.688 | 6.540  | 1.00 | 0.00 |
| C    |      |     |     |    |                |        |      |      |
| ATOM | 4906 | CB  | LEU | 21 | 31.496-116.603 | 6.274  | 1.00 | 0.00 |
| C    |      |     |     |    |                |        |      |      |
| ATOM | 4907 | CG  | LEU | 21 | 32.466-116.857 | 7.460  | 1.00 | 0.00 |
| C    |      |     |     |    |                |        |      |      |
| ATOM | 4908 | CD1 | LEU | 21 | 32.343-118.323 | 8.039  | 1.00 | 0.00 |
| C    |      |     |     |    |                |        |      |      |
| ATOM | 4909 | CD2 | LEU | 21 | 33.932-116.595 | 7.099  | 1.00 | 0.00 |
| C    |      |     |     |    |                |        |      |      |
| ATOM | 4910 | C   | LEU | 21 | 29.524-115.964 | 7.818  | 1.00 | 0.00 |
| C    |      |     |     |    |                |        |      |      |
| ATOM | 4911 | O   | LEU | 21 | 29.468-114.712 | 7.792  | 1.00 | 0.00 |
| O    |      |     |     |    |                |        |      |      |
| ATOM | 4912 | N   | GLU | 22 | 29.285-116.679 | 8.929  | 1.00 | 0.00 |
| N    |      |     |     |    |                |        |      |      |
| ATOM | 4913 | CA  | GLU | 22 | 28.683-116.097 | 10.161 | 1.00 | 0.00 |
| C    |      |     |     |    |                |        |      |      |
| ATOM | 4914 | CB  | GLU | 22 | 27.333-116.718 | 10.489 | 1.00 | 0.00 |
| C    |      |     |     |    |                |        |      |      |
| ATOM | 4915 | CG  | GLU | 22 | 26.230-116.281 | 9.461  | 1.00 | 0.00 |
| C    |      |     |     |    |                |        |      |      |
| ATOM | 4916 | CD  | GLU | 22 | 25.529-114.949 | 9.783  | 1.00 | 0.00 |
| C    |      |     |     |    |                |        |      |      |
| ATOM | 4917 | OE1 | GLU | 22 | 26.202-114.109 | 10.260 | 1.00 | 0.00 |
| O    |      |     |     |    |                |        |      |      |
| ATOM | 4918 | OE2 | GLU | 22 | 24.381-114.765 | 9.312  | 1.00 | 0.00 |
| O1-  |      |     |     |    |                |        |      |      |
| ATOM | 4919 | C   | GLU | 22 | 29.672-116.213 | 11.309 | 1.00 | 0.00 |
| C    |      |     |     |    |                |        |      |      |
| ATOM | 4920 | O   | GLU | 22 | 29.656-115.411 | 12.248 | 1.00 | 0.00 |
| O    |      |     |     |    |                |        |      |      |
| ATOM | 4921 | N   | SER | 23 | 30.474-117.246 | 11.440 | 1.00 | 0.00 |
| N    |      |     |     |    |                |        |      |      |
| ATOM | 4922 | CA  | SER | 23 | 31.429-117.360 | 12.550 | 1.00 | 0.00 |
| C    |      |     |     |    |                |        |      |      |
| ATOM | 4923 | CB  | SER | 23 | 30.665-117.730 | 13.793 | 1.00 | 0.00 |
| C    |      |     |     |    |                |        |      |      |
| ATOM | 4924 | OG  | SER | 23 | 31.446-118.358 | 14.690 | 1.00 | 0.00 |
| O    |      |     |     |    |                |        |      |      |
| ATOM | 4925 | C   | SER | 23 | 32.578-118.387 | 12.202 | 1.00 | 0.00 |
| C    |      |     |     |    |                |        |      |      |
| ATOM | 4926 | O   | SER | 23 | 32.325-119.151 | 11.229 | 1.00 | 0.00 |
| O    |      |     |     |    |                |        |      |      |
| ATOM | 4927 | N   | GLY | 24 | 33.810-118.406 | 12.787 | 1.00 | 0.00 |
| N    |      |     |     |    |                |        |      |      |
| ATOM | 4928 | CA  | GLY | 24 | 34.847-119.311 | 12.279 | 1.00 | 0.00 |
| C    |      |     |     |    |                |        |      |      |
| ATOM | 4929 | C   | GLY | 24 | 35.484-118.867 | 10.969 | 1.00 | 0.00 |
| C    |      |     |     |    |                |        |      |      |
| ATOM | 4930 | O   | GLY | 24 | 35.723-117.688 | 10.738 | 1.00 | 0.00 |
| O    |      |     |     |    |                |        |      |      |
| ATOM | 4931 | N   | SER | 25 | 35.708-119.865 | 10.134 | 1.00 | 0.00 |
| N    |      |     |     |    |                |        |      |      |

|      |      |     |     |    |                |        |      |      |
|------|------|-----|-----|----|----------------|--------|------|------|
| ATOM | 4932 | CA  | SER | 25 | 36.292-119.746 | 8.821  | 1.00 | 0.00 |
| C    |      |     |     |    |                |        |      |      |
| ATOM | 4933 | CB  | SER | 25 | 37.809-119.470 | 8.924  | 1.00 | 0.00 |
| C    |      |     |     |    |                |        |      |      |
| ATOM | 4934 | OG  | SER | 25 | 38.470-120.635 | 9.460  | 1.00 | 0.00 |
| O    |      |     |     |    |                |        |      |      |
| ATOM | 4935 | C   | SER | 25 | 36.099-120.963 | 7.909  | 1.00 | 0.00 |
| C    |      |     |     |    |                |        |      |      |
| ATOM | 4936 | O   | SER | 25 | 35.836-122.079 | 8.422  | 1.00 | 0.00 |
| O    |      |     |     |    |                |        |      |      |
| ATOM | 4937 | N   | ILE | 26 | 36.154-120.752 | 6.626  | 1.00 | 0.00 |
| N    |      |     |     |    |                |        |      |      |
| ATOM | 4938 | CA  | ILE | 26 | 35.782-121.731 | 5.581  | 1.00 | 0.00 |
| C    |      |     |     |    |                |        |      |      |
| ATOM | 4939 | CB  | ILE | 26 | 34.316-121.656 | 5.076  | 1.00 | 0.00 |
| C    |      |     |     |    |                |        |      |      |
| ATOM | 4940 | CG2 | ILE | 26 | 34.050-122.637 | 3.890  | 1.00 | 0.00 |
| C    |      |     |     |    |                |        |      |      |
| ATOM | 4941 | CG1 | ILE | 26 | 33.465-122.068 | 6.315  | 1.00 | 0.00 |
| C    |      |     |     |    |                |        |      |      |
| ATOM | 4942 | CD1 | ILE | 26 | 31.937-122.033 | 5.962  | 1.00 | 0.00 |
| C    |      |     |     |    |                |        |      |      |
| ATOM | 4943 | C   | ILE | 26 | 36.841-121.600 | 4.417  | 1.00 | 0.00 |
| C    |      |     |     |    |                |        |      |      |
| ATOM | 4944 | O   | ILE | 26 | 36.786-120.613 | 3.712  | 1.00 | 0.00 |
| O    |      |     |     |    |                |        |      |      |
| ATOM | 4945 | N   | CYS | 27 | 37.642-122.623 | 4.238  | 1.00 | 0.00 |
| N    |      |     |     |    |                |        |      |      |
| ATOM | 4946 | CA  | CYS | 27 | 38.817-122.666 | 3.324  | 1.00 | 0.00 |
| C    |      |     |     |    |                |        |      |      |
| ATOM | 4947 | CB  | CYS | 27 | 40.071-122.517 | 4.187  | 1.00 | 0.00 |
| C    |      |     |     |    |                |        |      |      |
| ATOM | 4948 | SG  | CYS | 27 | 41.650-122.373 | 3.283  | 1.00 | 0.00 |
| S    |      |     |     |    |                |        |      |      |
| ATOM | 4949 | C   | CYS | 27 | 38.899-123.860 | 2.313  | 1.00 | 0.00 |
| C    |      |     |     |    |                |        |      |      |
| ATOM | 4950 | O   | CYS | 27 | 38.301-124.880 | 2.667  | 1.00 | 0.00 |
| O    |      |     |     |    |                |        |      |      |
| ATOM | 4951 | N   | LYS | 28 | 39.664-123.640 | 1.153  | 1.00 | 0.00 |
| N    |      |     |     |    |                |        |      |      |
| ATOM | 4952 | CA  | LYS | 28 | 39.908-124.793 | 0.322  | 1.00 | 0.00 |
| C    |      |     |     |    |                |        |      |      |
| ATOM | 4953 | CB  | LYS | 28 | 40.950-124.342 | -0.751 | 1.00 | 0.00 |
| C    |      |     |     |    |                |        |      |      |
| ATOM | 4954 | CG  | LYS | 28 | 40.322-123.413 | -1.808 | 1.00 | 0.00 |
| C    |      |     |     |    |                |        |      |      |
| ATOM | 4955 | CD  | LYS | 28 | 41.006-123.371 | -3.179 | 1.00 | 0.00 |
| C    |      |     |     |    |                |        |      |      |
| ATOM | 4956 | CE  | LYS | 28 | 41.407-124.746 | -3.829 | 1.00 | 0.00 |
| C    |      |     |     |    |                |        |      |      |
| ATOM | 4957 | NZ  | LYS | 28 | 41.833-124.651 | -5.261 | 1.00 | 0.00 |
| N1+  |      |     |     |    |                |        |      |      |
| ATOM | 4958 | C   | LYS | 28 | 40.528-125.983 | 1.086  | 1.00 | 0.00 |
| C    |      |     |     |    |                |        |      |      |

|      |      |     |     |    |                |       |      |      |
|------|------|-----|-----|----|----------------|-------|------|------|
| ATOM | 4959 | O   | LYS | 28 | 41.465-125.841 | 1.933 | 1.00 | 0.00 |
| O    |      |     |     |    |                |       |      |      |
| ATOM | 4960 | N   | GLY | 29 | 39.953-127.163 | 0.820 | 1.00 | 0.00 |
| N    |      |     |     |    |                |       |      |      |
| ATOM | 4961 | CA  | GLY | 29 | 40.293-128.419 | 1.494 | 1.00 | 0.00 |
| C    |      |     |     |    |                |       |      |      |
| ATOM | 4962 | C   | GLY | 29 | 39.659-128.689 | 2.807 | 1.00 | 0.00 |
| C    |      |     |     |    |                |       |      |      |
| ATOM | 4963 | O   | GLY | 29 | 39.803-129.802 | 3.347 | 1.00 | 0.00 |
| O    |      |     |     |    |                |       |      |      |
| ATOM | 4964 | N   | GLN | 30 | 38.993-127.717 | 3.390 | 1.00 | 0.00 |
| N    |      |     |     |    |                |       |      |      |
| ATOM | 4965 | CA  | GLN | 30 | 38.380-127.926 | 4.724 | 1.00 | 0.00 |
| C    |      |     |     |    |                |       |      |      |
| ATOM | 4966 | CB  | GLN | 30 | 38.061-126.579 | 5.365 | 1.00 | 0.00 |
| C    |      |     |     |    |                |       |      |      |
| ATOM | 4967 | CG  | GLN | 30 | 37.550-126.652 | 6.788 | 1.00 | 0.00 |
| C    |      |     |     |    |                |       |      |      |
| ATOM | 4968 | CD  | GLN | 30 | 37.258-125.214 | 7.203 | 1.00 | 0.00 |
| C    |      |     |     |    |                |       |      |      |
| ATOM | 4969 | OE1 | GLN | 30 | 37.860-124.251 | 6.760 | 1.00 | 0.00 |
| O    |      |     |     |    |                |       |      |      |
| ATOM | 4970 | NE2 | GLN | 30 | 36.400-124.935 | 8.085 | 1.00 | 0.00 |
| N    |      |     |     |    |                |       |      |      |
| ATOM | 4971 | C   | GLN | 30 | 37.074-128.732 | 4.557 | 1.00 | 0.00 |
| C    |      |     |     |    |                |       |      |      |
| ATOM | 4972 | O   | GLN | 30 | 36.367-128.580 | 3.532 | 1.00 | 0.00 |
| O    |      |     |     |    |                |       |      |      |
| ATOM | 4973 | N   | GLN | 31 | 36.809-129.726 | 5.400 | 1.00 | 0.00 |
| N    |      |     |     |    |                |       |      |      |
| ATOM | 4974 | CA  | GLN | 31 | 35.553-130.539 | 5.457 | 1.00 | 0.00 |
| C    |      |     |     |    |                |       |      |      |
| ATOM | 4975 | CB  | GLN | 31 | 35.987-131.928 | 5.896 | 1.00 | 0.00 |
| C    |      |     |     |    |                |       |      |      |
| ATOM | 4976 | CG  | GLN | 31 | 36.833-132.449 | 4.681 | 1.00 | 0.00 |
| C    |      |     |     |    |                |       |      |      |
| ATOM | 4977 | CD  | GLN | 31 | 36.667-133.928 | 4.607 | 1.00 | 0.00 |
| C    |      |     |     |    |                |       |      |      |
| ATOM | 4978 | OE1 | GLN | 31 | 36.494-134.581 | 5.617 | 1.00 | 0.00 |
| O    |      |     |     |    |                |       |      |      |
| ATOM | 4979 | NE2 | GLN | 31 | 36.849-134.574 | 3.469 | 1.00 | 0.00 |
| N    |      |     |     |    |                |       |      |      |
| ATOM | 4980 | C   | GLN | 31 | 34.674-129.886 | 6.562 | 1.00 | 0.00 |
| C    |      |     |     |    |                |       |      |      |
| ATOM | 4981 | O   | GLN | 31 | 35.127-129.462 | 7.644 | 1.00 | 0.00 |
| O    |      |     |     |    |                |       |      |      |
| ATOM | 4982 | N   | LEU | 32 | 33.428-129.973 | 6.243 | 1.00 | 0.00 |
| N    |      |     |     |    |                |       |      |      |
| ATOM | 4983 | CA  | LEU | 32 | 32.326-129.330 | 6.920 | 1.00 | 0.00 |
| C    |      |     |     |    |                |       |      |      |
| ATOM | 4984 | CB  | LEU | 32 | 32.029-127.942 | 6.344 | 1.00 | 0.00 |
| C    |      |     |     |    |                |       |      |      |
| ATOM | 4985 | CG  | LEU | 32 | 33.196-126.966 | 6.327 | 1.00 | 0.00 |
| C    |      |     |     |    |                |       |      |      |

|      |      |     |     |    |                |        |      |      |
|------|------|-----|-----|----|----------------|--------|------|------|
| ATOM | 4986 | CD1 | LEU | 32 | 33.518-126.443 | 4.921  | 1.00 | 0.00 |
| C    |      |     |     |    |                |        |      |      |
| ATOM | 4987 | CD2 | LEU | 32 | 32.965-125.732 | 7.289  | 1.00 | 0.00 |
| C    |      |     |     |    |                |        |      |      |
| ATOM | 4988 | C   | LEU | 32 | 31.050-130.311 | 6.844  | 1.00 | 0.00 |
| C    |      |     |     |    |                |        |      |      |
| ATOM | 4989 | O   | LEU | 32 | 30.896-131.049 | 5.899  | 1.00 | 0.00 |
| O    |      |     |     |    |                |        |      |      |
| ATOM | 4990 | N   | VAL | 33 | 30.145-130.237 | 7.846  | 1.00 | 0.00 |
| N    |      |     |     |    |                |        |      |      |
| ATOM | 4991 | CA  | VAL | 33 | 28.846-131.013 | 8.007  | 1.00 | 0.00 |
| C    |      |     |     |    |                |        |      |      |
| ATOM | 4992 | CB  | VAL | 33 | 28.788-131.671 | 9.368  | 1.00 | 0.00 |
| C    |      |     |     |    |                |        |      |      |
| ATOM | 4993 | CG1 | VAL | 33 | 27.256-132.067 | 9.644  | 1.00 | 0.00 |
| C    |      |     |     |    |                |        |      |      |
| ATOM | 4994 | CG2 | VAL | 33 | 29.744-132.886 | 9.451  | 1.00 | 0.00 |
| C    |      |     |     |    |                |        |      |      |
| ATOM | 4995 | C   | VAL | 33 | 27.702-129.989 | 7.805  | 1.00 | 0.00 |
| C    |      |     |     |    |                |        |      |      |
| ATOM | 4996 | O   | VAL | 33 | 27.530-129.054 | 8.586  | 1.00 | 0.00 |
| O    |      |     |     |    |                |        |      |      |
| ATOM | 4997 | N   | MET | 34 | 27.019-130.185 | 6.665  | 1.00 | 0.00 |
| N    |      |     |     |    |                |        |      |      |
| ATOM | 4998 | CA  | MET | 34 | 25.738-129.534 | 6.330  | 1.00 | 0.00 |
| C    |      |     |     |    |                |        |      |      |
| ATOM | 4999 | CB  | MET | 34 | 25.468-129.684 | 4.842  | 1.00 | 0.00 |
| C    |      |     |     |    |                |        |      |      |
| ATOM | 5000 | CG  | MET | 34 | 24.401-128.879 | 4.308  | 1.00 | 0.00 |
| C    |      |     |     |    |                |        |      |      |
| ATOM | 5001 | SD  | MET | 34 | 24.263-128.908 | 2.493  | 1.00 | 0.00 |
| S    |      |     |     |    |                |        |      |      |
| ATOM | 5002 | CE  | MET | 34 | 24.161-130.640 | 2.159  | 1.00 | 0.00 |
| C    |      |     |     |    |                |        |      |      |
| ATOM | 5003 | C   | MET | 34 | 24.546-130.083 | 7.169  | 1.00 | 0.00 |
| C    |      |     |     |    |                |        |      |      |
| ATOM | 5004 | O   | MET | 34 | 24.191-131.247 | 7.201  | 1.00 | 0.00 |
| O    |      |     |     |    |                |        |      |      |
| ATOM | 5005 | N   | MET | 35 | 23.955-129.094 | 7.878  | 1.00 | 0.00 |
| N    |      |     |     |    |                |        |      |      |
| ATOM | 5006 | CA  | MET | 35 | 22.751-129.256 | 8.637  | 1.00 | 0.00 |
| C    |      |     |     |    |                |        |      |      |
| ATOM | 5007 | CB  | MET | 35 | 22.887-128.506 | 9.983  | 1.00 | 0.00 |
| C    |      |     |     |    |                |        |      |      |
| ATOM | 5008 | CG  | MET | 35 | 24.036-129.197 | 10.788 | 1.00 | 0.00 |
| C    |      |     |     |    |                |        |      |      |
| ATOM | 5009 | SD  | MET | 35 | 23.725-130.916 | 11.147 | 1.00 | 0.00 |
| S    |      |     |     |    |                |        |      |      |
| ATOM | 5010 | CE  | MET | 35 | 22.372-130.910 | 12.404 | 1.00 | 0.00 |
| C    |      |     |     |    |                |        |      |      |
| ATOM | 5011 | C   | MET | 35 | 21.583-128.658 | 7.851  | 1.00 | 0.00 |
| C    |      |     |     |    |                |        |      |      |
| ATOM | 5012 | O   | MET | 35 | 21.765-127.715 | 7.081  | 1.00 | 0.00 |
| O    |      |     |     |    |                |        |      |      |

|      |      |     |     |    |                |        |      |      |
|------|------|-----|-----|----|----------------|--------|------|------|
| ATOM | 5013 | N   | PRO | 36 | 20.323-129.161 | 8.062  | 1.00 | 0.00 |
| N    |      |     |     |    |                |        |      |      |
| ATOM | 5014 | CD  | PRO | 36 | 19.133-128.690 | 7.367  | 1.00 | 0.00 |
| C    |      |     |     |    |                |        |      |      |
| ATOM | 5015 | CG  | PRO | 36 | 17.911-129.419 | 7.834  | 1.00 | 0.00 |
| C    |      |     |     |    |                |        |      |      |
| ATOM | 5016 | CB  | PRO | 36 | 18.355-129.921 | 9.189  | 1.00 | 0.00 |
| C    |      |     |     |    |                |        |      |      |
| ATOM | 5017 | CA  | PRO | 36 | 19.875-130.007 | 9.141  | 1.00 | 0.00 |
| C    |      |     |     |    |                |        |      |      |
| ATOM | 5018 | C   | PRO | 36 | 20.327-131.532 | 8.886  | 1.00 | 0.00 |
| C    |      |     |     |    |                |        |      |      |
| ATOM | 5019 | O   | PRO | 36 | 20.572-132.304 | 9.873  | 1.00 | 0.00 |
| O    |      |     |     |    |                |        |      |      |
| ATOM | 5020 | N   | ASN | 37 | 20.519-131.986 | 7.669  | 1.00 | 0.00 |
| N    |      |     |     |    |                |        |      |      |
| ATOM | 5021 | CA  | ASN | 37 | 20.694-133.408 | 7.414  | 1.00 | 0.00 |
| C    |      |     |     |    |                |        |      |      |
| ATOM | 5022 | CB  | ASN | 37 | 20.184-133.809 | 5.992  | 1.00 | 0.00 |
| C    |      |     |     |    |                |        |      |      |
| ATOM | 5023 | CG  | ASN | 37 | 18.799-133.281 | 5.646  | 1.00 | 0.00 |
| C    |      |     |     |    |                |        |      |      |
| ATOM | 5024 | OD1 | ASN | 37 | 17.903-133.148 | 6.492  | 1.00 | 0.00 |
| O    |      |     |     |    |                |        |      |      |
| ATOM | 5025 | ND2 | ASN | 37 | 18.509-132.976 | 4.457  | 1.00 | 0.00 |
| N    |      |     |     |    |                |        |      |      |
| ATOM | 5026 | C   | ASN | 37 | 22.050-134.142 | 7.794  | 1.00 | 0.00 |
| C    |      |     |     |    |                |        |      |      |
| ATOM | 5027 | O   | ASN | 37 | 22.294-135.293 | 7.391  | 1.00 | 0.00 |
| O    |      |     |     |    |                |        |      |      |
| ATOM | 5028 | N   | LYS | 38 | 22.898-133.487 | 8.558  | 1.00 | 0.00 |
| N    |      |     |     |    |                |        |      |      |
| ATOM | 5029 | CA  | LYS | 38 | 24.134-134.039 | 9.137  | 1.00 | 0.00 |
| C    |      |     |     |    |                |        |      |      |
| ATOM | 5030 | CB  | LYS | 38 | 23.725-134.832 | 10.371 | 1.00 | 0.00 |
| C    |      |     |     |    |                |        |      |      |
| ATOM | 5031 | CG  | LYS | 38 | 24.940-135.182 | 11.251 | 1.00 | 0.00 |
| C    |      |     |     |    |                |        |      |      |
| ATOM | 5032 | CD  | LYS | 38 | 24.521-135.707 | 12.629 | 1.00 | 0.00 |
| C    |      |     |     |    |                |        |      |      |
| ATOM | 5033 | CE  | LYS | 38 | 23.526-136.884 | 12.558 | 1.00 | 0.00 |
| C    |      |     |     |    |                |        |      |      |
| ATOM | 5034 | NZ  | LYS | 38 | 22.977-137.221 | 13.923 | 1.00 | 0.00 |
| N1+  |      |     |     |    |                |        |      |      |
| ATOM | 5035 | C   | LYS | 38 | 25.052-134.708 | 8.038  | 1.00 | 0.00 |
| C    |      |     |     |    |                |        |      |      |
| ATOM | 5036 | O   | LYS | 38 | 25.611-135.858 | 8.184  | 1.00 | 0.00 |
| O    |      |     |     |    |                |        |      |      |
| ATOM | 5037 | N   | HIE | 39 | 25.212-134.021 | 6.896  | 1.00 | 0.00 |
| N    |      |     |     |    |                |        |      |      |
| ATOM | 5038 | CA  | HIE | 39 | 25.991-134.474 | 5.718  | 1.00 | 0.00 |
| C    |      |     |     |    |                |        |      |      |
| ATOM | 5039 | CB  | HIE | 39 | 25.227-134.495 | 4.405  | 1.00 | 0.00 |
| C    |      |     |     |    |                |        |      |      |

|      |      |     |     |    |                |       |      |      |
|------|------|-----|-----|----|----------------|-------|------|------|
| ATOM | 5040 | CG  | HIE | 39 | 25.985-134.881 | 3.149 | 1.00 | 0.00 |
| C    |      |     |     |    |                |       |      |      |
| ATOM | 5041 | ND1 | HIE | 39 | 26.395-136.170 | 2.840 | 1.00 | 0.00 |
| N    |      |     |     |    |                |       |      |      |
| ATOM | 5042 | CE1 | HIE | 39 | 26.973-136.183 | 1.667 | 1.00 | 0.00 |
| C    |      |     |     |    |                |       |      |      |
| ATOM | 5043 | NE2 | HIE | 39 | 26.891-134.970 | 1.056 | 1.00 | 0.00 |
| N    |      |     |     |    |                |       |      |      |
| ATOM | 5044 | CD2 | HIE | 39 | 26.353-134.114 | 2.035 | 1.00 | 0.00 |
| C    |      |     |     |    |                |       |      |      |
| ATOM | 5045 | C   | HIE | 39 | 27.354-133.801 | 5.473 | 1.00 | 0.00 |
| C    |      |     |     |    |                |       |      |      |
| ATOM | 5046 | O   | HIE | 39 | 27.502-132.596 | 5.291 | 1.00 | 0.00 |
| O    |      |     |     |    |                |       |      |      |
| ATOM | 5047 | N   | ASN | 40 | 28.443-134.575 | 5.222 | 1.00 | 0.00 |
| N    |      |     |     |    |                |       |      |      |
| ATOM | 5048 | CA  | ASN | 40 | 29.784-134.055 | 4.933 | 1.00 | 0.00 |
| C    |      |     |     |    |                |       |      |      |
| ATOM | 5049 | CB  | ASN | 40 | 30.724-135.198 | 5.258 | 1.00 | 0.00 |
| C    |      |     |     |    |                |       |      |      |
| ATOM | 5050 | CG  | ASN | 40 | 31.112-135.214 | 6.739 | 1.00 | 0.00 |
| C    |      |     |     |    |                |       |      |      |
| ATOM | 5051 | OD1 | ASN | 40 | 32.100-134.663 | 7.200 | 1.00 | 0.00 |
| O    |      |     |     |    |                |       |      |      |
| ATOM | 5052 | ND2 | ASN | 40 | 30.298-135.845 | 7.522 | 1.00 | 0.00 |
| N    |      |     |     |    |                |       |      |      |
| ATOM | 5053 | C   | ASN | 40 | 30.053-133.619 | 3.494 | 1.00 | 0.00 |
| C    |      |     |     |    |                |       |      |      |
| ATOM | 5054 | O   | ASN | 40 | 29.915-134.326 | 2.495 | 1.00 | 0.00 |
| O    |      |     |     |    |                |       |      |      |
| ATOM | 5055 | N   | VAL | 41 | 30.599-132.415 | 3.362 | 1.00 | 0.00 |
| N    |      |     |     |    |                |       |      |      |
| ATOM | 5056 | CA  | VAL | 41 | 31.162-131.857 | 2.134 | 1.00 | 0.00 |
| C    |      |     |     |    |                |       |      |      |
| ATOM | 5057 | CB  | VAL | 41 | 30.150-130.823 | 1.533 | 1.00 | 0.00 |
| C    |      |     |     |    |                |       |      |      |
| ATOM | 5058 | CG1 | VAL | 41 | 28.758-131.419 | 1.191 | 1.00 | 0.00 |
| C    |      |     |     |    |                |       |      |      |
| ATOM | 5059 | CG2 | VAL | 41 | 29.803-129.677 | 2.534 | 1.00 | 0.00 |
| C    |      |     |     |    |                |       |      |      |
| ATOM | 5060 | C   | VAL | 41 | 32.503-131.130 | 2.330 | 1.00 | 0.00 |
| C    |      |     |     |    |                |       |      |      |
| ATOM | 5061 | O   | VAL | 41 | 32.972-131.021 | 3.442 | 1.00 | 0.00 |
| O    |      |     |     |    |                |       |      |      |
| ATOM | 5062 | N   | GLU | 42 | 33.091-130.627 | 1.273 | 1.00 | 0.00 |
| N    |      |     |     |    |                |       |      |      |
| ATOM | 5063 | CA  | GLU | 42 | 34.518-130.214 | 1.149 | 1.00 | 0.00 |
| C    |      |     |     |    |                |       |      |      |
| ATOM | 5064 | CB  | GLU | 42 | 35.380-131.530 | 1.009 | 1.00 | 0.00 |
| C    |      |     |     |    |                |       |      |      |
| ATOM | 5065 | CG  | GLU | 42 | 36.912-131.221 | 1.108 | 1.00 | 0.00 |
| C    |      |     |     |    |                |       |      |      |
| ATOM | 5066 | CD  | GLU | 42 | 37.805-132.459 | 0.981 | 1.00 | 0.00 |
| C    |      |     |     |    |                |       |      |      |

|      |      |     |     |    |                |        |      |      |
|------|------|-----|-----|----|----------------|--------|------|------|
| ATOM | 5067 | OE1 | GLU | 42 | 37.319-133.624 | 0.995  | 1.00 | 0.00 |
| O    |      |     |     |    |                |        |      |      |
| ATOM | 5068 | OE2 | GLU | 42 | 39.049-132.267 | 0.913  | 1.00 | 0.00 |
| O1-  |      |     |     |    |                |        |      |      |
| ATOM | 5069 | C   | GLU | 42 | 34.676-129.167 | 0.018  | 1.00 | 0.00 |
| C    |      |     |     |    |                |        |      |      |
| ATOM | 5070 | O   | GLU | 42 | 34.062-129.307 | -1.015 | 1.00 | 0.00 |
| O    |      |     |     |    |                |        |      |      |
| ATOM | 5071 | N   | VAL | 43 | 35.438-128.178 | 0.345  | 1.00 | 0.00 |
| N    |      |     |     |    |                |        |      |      |
| ATOM | 5072 | CA  | VAL | 43 | 35.381-126.927 | -0.371 | 1.00 | 0.00 |
| C    |      |     |     |    |                |        |      |      |
| ATOM | 5073 | CB  | VAL | 43 | 35.487-125.680 | 0.523  | 1.00 | 0.00 |
| C    |      |     |     |    |                |        |      |      |
| ATOM | 5074 | CG1 | VAL | 43 | 35.927-124.351 | -0.144 | 1.00 | 0.00 |
| C    |      |     |     |    |                |        |      |      |
| ATOM | 5075 | CG2 | VAL | 43 | 34.139-125.406 | 1.191  | 1.00 | 0.00 |
| C    |      |     |     |    |                |        |      |      |
| ATOM | 5076 | C   | VAL | 43 | 36.591-126.891 | -1.360 | 1.00 | 0.00 |
| C    |      |     |     |    |                |        |      |      |
| ATOM | 5077 | O   | VAL | 43 | 37.719-127.235 | -1.055 | 1.00 | 0.00 |
| O    |      |     |     |    |                |        |      |      |
| ATOM | 5078 | N   | LEU | 44 | 36.255-126.503 | -2.582 | 1.00 | 0.00 |
| N    |      |     |     |    |                |        |      |      |
| ATOM | 5079 | CA  | LEU | 44 | 37.181-126.528 | -3.700 | 1.00 | 0.00 |
| C    |      |     |     |    |                |        |      |      |
| ATOM | 5080 | CB  | LEU | 44 | 36.393-127.286 | -4.815 | 1.00 | 0.00 |
| C    |      |     |     |    |                |        |      |      |
| ATOM | 5081 | CG  | LEU | 44 | 37.133-127.301 | -6.147 | 1.00 | 0.00 |
| C    |      |     |     |    |                |        |      |      |
| ATOM | 5082 | CD1 | LEU | 44 | 38.528-127.966 | -6.144 | 1.00 | 0.00 |
| C    |      |     |     |    |                |        |      |      |
| ATOM | 5083 | CD2 | LEU | 44 | 36.234-128.038 | -7.169 | 1.00 | 0.00 |
| C    |      |     |     |    |                |        |      |      |
| ATOM | 5084 | C   | LEU | 44 | 37.645-125.103 | -4.086 | 1.00 | 0.00 |
| C    |      |     |     |    |                |        |      |      |
| ATOM | 5085 | O   | LEU | 44 | 38.678-124.990 | -4.716 | 1.00 | 0.00 |
| O    |      |     |     |    |                |        |      |      |
| ATOM | 5086 | N   | GLY | 45 | 36.922-124.040 | -3.743 | 1.00 | 0.00 |
| N    |      |     |     |    |                |        |      |      |
| ATOM | 5087 | CA  | GLY | 45 | 37.187-122.662 | -4.274 | 1.00 | 0.00 |
| C    |      |     |     |    |                |        |      |      |
| ATOM | 5088 | C   | GLY | 45 | 36.050-121.650 | -4.093 | 1.00 | 0.00 |
| C    |      |     |     |    |                |        |      |      |
| ATOM | 5089 | O   | GLY | 45 | 34.999-122.008 | -3.548 | 1.00 | 0.00 |
| O    |      |     |     |    |                |        |      |      |
| ATOM | 5090 | N   | ILE | 46 | 36.181-120.428 | -4.570 | 1.00 | 0.00 |
| N    |      |     |     |    |                |        |      |      |
| ATOM | 5091 | CA  | ILE | 46 | 35.106-119.360 | -4.586 | 1.00 | 0.00 |
| C    |      |     |     |    |                |        |      |      |
| ATOM | 5092 | CB  | ILE | 46 | 35.469-118.353 | -3.489 | 1.00 | 0.00 |
| C    |      |     |     |    |                |        |      |      |
| ATOM | 5093 | CG2 | ILE | 46 | 34.523-117.136 | -3.490 | 1.00 | 0.00 |
| C    |      |     |     |    |                |        |      |      |



|      |      |     |     |    |                |        |      |      |
|------|------|-----|-----|----|----------------|--------|------|------|
| ATOM | 5094 | CG1 | ILE | 46 | 35.365-118.911 | -2.047 | 1.00 | 0.00 |
| C    |      |     |     |    |                |        |      |      |
| ATOM | 5095 | CD1 | ILE | 46 | 36.741-119.089 | -1.458 | 1.00 | 0.00 |
| C    |      |     |     |    |                |        |      |      |
| ATOM | 5096 | C   | ILE | 46 | 35.110-118.684 | -5.954 | 1.00 | 0.00 |
| C    |      |     |     |    |                |        |      |      |
| ATOM | 5097 | O   | ILE | 46 | 36.165-118.615 | -6.577 | 1.00 | 0.00 |
| O    |      |     |     |    |                |        |      |      |
| ATOM | 5098 | N   | LEU | 47 | 33.941-118.305 | -6.536 | 1.00 | 0.00 |
| N    |      |     |     |    |                |        |      |      |
| ATOM | 5099 | CA  | LEU | 47 | 33.776-117.466 | -7.751 | 1.00 | 0.00 |
| C    |      |     |     |    |                |        |      |      |
| ATOM | 5100 | CB  | LEU | 47 | 32.309-117.442 | -8.208 | 1.00 | 0.00 |
| C    |      |     |     |    |                |        |      |      |
| ATOM | 5101 | CG  | LEU | 47 | 31.896-118.656 | -9.069 | 1.00 | 0.00 |
| C    |      |     |     |    |                |        |      |      |
| ATOM | 5102 | CD1 | LEU | 47 | 32.049-119.967 | -8.314 | 1.00 | 0.00 |
| C    |      |     |     |    |                |        |      |      |
| ATOM | 5103 | CD2 | LEU | 47 | 30.439-118.505 | -9.453 | 1.00 | 0.00 |
| C    |      |     |     |    |                |        |      |      |
| ATOM | 5104 | C   | LEU | 47 | 34.327-116.069 | -7.438 | 1.00 | 0.00 |
| C    |      |     |     |    |                |        |      |      |
| ATOM | 5105 | O   | LEU | 47 | 34.053-115.411 | -6.381 | 1.00 | 0.00 |
| O    |      |     |     |    |                |        |      |      |
| ATOM | 5106 | N   | SER | 48 | 35.186-115.610 | -8.383 | 1.00 | 0.00 |
| N    |      |     |     |    |                |        |      |      |
| ATOM | 5107 | CA  | SER | 48 | 35.891-114.421 | -8.273 | 1.00 | 0.00 |
| C    |      |     |     |    |                |        |      |      |
| ATOM | 5108 | CB  | SER | 48 | 37.132-114.240 | -9.183 | 1.00 | 0.00 |
| C    |      |     |     |    |                |        |      |      |
| ATOM | 5109 | OG  | SER | 48 | 37.999-113.283 | -8.669 | 1.00 | 0.00 |
| O    |      |     |     |    |                |        |      |      |
| ATOM | 5110 | C   | SER | 48 | 34.959-113.191 | -8.439 | 1.00 | 0.00 |
| C    |      |     |     |    |                |        |      |      |
| ATOM | 5111 | O   | SER | 48 | 34.307-113.000 | -9.505 | 1.00 | 0.00 |
| O    |      |     |     |    |                |        |      |      |
| ATOM | 5112 | N   | ASP | 49 | 34.919-112.341 | -7.455 | 1.00 | 0.00 |
| N    |      |     |     |    |                |        |      |      |
| ATOM | 5113 | CA  | ASP | 49 | 34.191-111.005 | -7.466 | 1.00 | 0.00 |
| C    |      |     |     |    |                |        |      |      |
| ATOM | 5114 | CB  | ASP | 49 | 33.683-110.665 | -6.049 | 1.00 | 0.00 |
| C    |      |     |     |    |                |        |      |      |
| ATOM | 5115 | CG  | ASP | 49 | 32.506-111.586 | -5.759 | 1.00 | 0.00 |
| C    |      |     |     |    |                |        |      |      |
| ATOM | 5116 | OD1 | ASP | 49 | 32.601-112.836 | -5.894 | 1.00 | 0.00 |
| O    |      |     |     |    |                |        |      |      |
| ATOM | 5117 | OD2 | ASP | 49 | 31.462-111.072 | -5.328 | 1.00 | 0.00 |
| O1-  |      |     |     |    |                |        |      |      |
| ATOM | 5118 | C   | ASP | 49 | 35.079-109.825 | -7.834 | 1.00 | 0.00 |
| C    |      |     |     |    |                |        |      |      |
| ATOM | 5119 | O   | ASP | 49 | 34.569-108.742 | -8.110 | 1.00 | 0.00 |
| O    |      |     |     |    |                |        |      |      |
| ATOM | 5120 | N   | ASP | 50 | 36.385-109.964 | -7.870 | 1.00 | 0.00 |
| N    |      |     |     |    |                |        |      |      |

|      |      |     |     |    |                |         |      |      |
|------|------|-----|-----|----|----------------|---------|------|------|
| ATOM | 5121 | CA  | ASP | 50 | 37.467-108.946 | -7.769  | 1.00 | 0.00 |
| C    |      |     |     |    |                |         |      |      |
| ATOM | 5122 | CB  | ASP | 50 | 37.427-108.208 | -6.395  | 1.00 | 0.00 |
| C    |      |     |     |    |                |         |      |      |
| ATOM | 5123 | CG  | ASP | 50 | 38.365-107.046 | -6.281  | 1.00 | 0.00 |
| C    |      |     |     |    |                |         |      |      |
| ATOM | 5124 | OD1 | ASP | 50 | 38.982-106.965 | -5.183  | 1.00 | 0.00 |
| O    |      |     |     |    |                |         |      |      |
| ATOM | 5125 | OD2 | ASP | 50 | 38.347-106.144 | -7.168  | 1.00 | 0.00 |
| O1-  |      |     |     |    |                |         |      |      |
| ATOM | 5126 | C   | ASP | 50 | 38.840-109.644 | -8.010  | 1.00 | 0.00 |
| C    |      |     |     |    |                |         |      |      |
| ATOM | 5127 | O   | ASP | 50 | 39.572-109.109 | -8.875  | 1.00 | 0.00 |
| O    |      |     |     |    |                |         |      |      |
| ATOM | 5128 | N   | VAL | 51 | 39.264-110.613 | -7.165  | 1.00 | 0.00 |
| N    |      |     |     |    |                |         |      |      |
| ATOM | 5129 | CA  | VAL | 51 | 40.603-111.234 | -7.138  | 1.00 | 0.00 |
| C    |      |     |     |    |                |         |      |      |
| ATOM | 5130 | CB  | VAL | 51 | 41.707-110.367 | -6.529  | 1.00 | 0.00 |
| C    |      |     |     |    |                |         |      |      |
| ATOM | 5131 | CG1 | VAL | 51 | 41.567-110.117 | -5.072  | 1.00 | 0.00 |
| C    |      |     |     |    |                |         |      |      |
| ATOM | 5132 | CG2 | VAL | 51 | 43.101-110.873 | -6.812  | 1.00 | 0.00 |
| C    |      |     |     |    |                |         |      |      |
| ATOM | 5133 | C   | VAL | 51 | 40.432-112.563 | -6.379  | 1.00 | 0.00 |
| C    |      |     |     |    |                |         |      |      |
| ATOM | 5134 | O   | VAL | 51 | 39.437-112.891 | -5.694  | 1.00 | 0.00 |
| O    |      |     |     |    |                |         |      |      |
| ATOM | 5135 | N   | GLU | 52 | 41.440-113.445 | -6.502  | 1.00 | 0.00 |
| N    |      |     |     |    |                |         |      |      |
| ATOM | 5136 | CA  | GLU | 52 | 41.360-114.955 | -6.209  | 1.00 | 0.00 |
| C    |      |     |     |    |                |         |      |      |
| ATOM | 5137 | CB  | GLU | 52 | 42.320-115.829 | -7.019  | 1.00 | 0.00 |
| C    |      |     |     |    |                |         |      |      |
| ATOM | 5138 | CG  | GLU | 52 | 42.434-115.376 | -8.521  | 1.00 | 0.00 |
| C    |      |     |     |    |                |         |      |      |
| ATOM | 5139 | CD  | GLU | 52 | 41.179-115.413 | -9.359  | 1.00 | 0.00 |
| C    |      |     |     |    |                |         |      |      |
| ATOM | 5140 | OE1 | GLU | 52 | 40.456-114.434 | -9.340  | 1.00 | 0.00 |
| O    |      |     |     |    |                |         |      |      |
| ATOM | 5141 | OE2 | GLU | 52 | 40.982-116.246 | -10.286 | 1.00 | 0.00 |
| O1-  |      |     |     |    |                |         |      |      |
| ATOM | 5142 | C   | GLU | 52 | 41.431-115.188 | -4.776  | 1.00 | 0.00 |
| C    |      |     |     |    |                |         |      |      |
| ATOM | 5143 | O   | GLU | 52 | 42.256-114.605 | -4.077  | 1.00 | 0.00 |
| O    |      |     |     |    |                |         |      |      |
| ATOM | 5144 | N   | THR | 53 | 40.629-116.065 | -4.305  | 1.00 | 0.00 |
| N    |      |     |     |    |                |         |      |      |
| ATOM | 5145 | CA  | THR | 53 | 40.567-116.366 | -2.896  | 1.00 | 0.00 |
| C    |      |     |     |    |                |         |      |      |
| ATOM | 5146 | CB  | THR | 53 | 39.405-115.648 | -2.098  | 1.00 | 0.00 |
| C    |      |     |     |    |                |         |      |      |
| ATOM | 5147 | CG2 | THR | 53 | 39.693-114.139 | -2.216  | 1.00 | 0.00 |
| C    |      |     |     |    |                |         |      |      |

|      |      |     |     |    |                |        |      |      |
|------|------|-----|-----|----|----------------|--------|------|------|
| ATOM | 5148 | OG1 | THR | 53 | 38.136-115.916 | -2.616 | 1.00 | 0.00 |
| O    |      |     |     |    |                |        |      |      |
| ATOM | 5149 | C   | THR | 53 | 40.520-117.879 | -2.720 | 1.00 | 0.00 |
| C    |      |     |     |    |                |        |      |      |
| ATOM | 5150 | O   | THR | 53 | 39.910-118.627 | -3.413 | 1.00 | 0.00 |
| O    |      |     |     |    |                |        |      |      |
| ATOM | 5151 | N   | ASP | 54 | 41.131-118.337 | -1.589 | 1.00 | 0.00 |
| N    |      |     |     |    |                |        |      |      |
| ATOM | 5152 | CA  | ASP | 54 | 41.133-119.747 | -1.136 | 1.00 | 0.00 |
| C    |      |     |     |    |                |        |      |      |
| ATOM | 5153 | CB  | ASP | 54 | 42.545-120.354 | -1.101 | 1.00 | 0.00 |
| C    |      |     |     |    |                |        |      |      |
| ATOM | 5154 | CG  | ASP | 54 | 43.502-119.726 | -0.010 | 1.00 | 0.00 |
| C    |      |     |     |    |                |        |      |      |
| ATOM | 5155 | OD1 | ASP | 54 | 43.109-118.868 | 0.780  | 1.00 | 0.00 |
| O    |      |     |     |    |                |        |      |      |
| ATOM | 5156 | OD2 | ASP | 54 | 44.647-120.281 | 0.002  | 1.00 | 0.00 |
| O1-  |      |     |     |    |                |        |      |      |
| ATOM | 5157 | C   | ASP | 54 | 40.360-119.892 | 0.242  | 1.00 | 0.00 |
| C    |      |     |     |    |                |        |      |      |
| ATOM | 5158 | O   | ASP | 54 | 40.258-120.996 | 0.783  | 1.00 | 0.00 |
| O    |      |     |     |    |                |        |      |      |
| ATOM | 5159 | N   | THR | 55 | 39.890-118.814 | 0.732  | 1.00 | 0.00 |
| N    |      |     |     |    |                |        |      |      |
| ATOM | 5160 | CA  | THR | 55 | 39.389-118.700 | 2.077  | 1.00 | 0.00 |
| C    |      |     |     |    |                |        |      |      |
| ATOM | 5161 | CB  | THR | 55 | 40.398-118.325 | 3.196  | 1.00 | 0.00 |
| C    |      |     |     |    |                |        |      |      |
| ATOM | 5162 | CG2 | THR | 55 | 39.941-118.487 | 4.693  | 1.00 | 0.00 |
| C    |      |     |     |    |                |        |      |      |
| ATOM | 5163 | OG1 | THR | 55 | 41.656-118.975 | 3.113  | 1.00 | 0.00 |
| O    |      |     |     |    |                |        |      |      |
| ATOM | 5164 | C   | THR | 55 | 38.296-117.683 | 1.999  | 1.00 | 0.00 |
| C    |      |     |     |    |                |        |      |      |
| ATOM | 5165 | O   | THR | 55 | 38.489-116.593 | 1.436  | 1.00 | 0.00 |
| O    |      |     |     |    |                |        |      |      |
| ATOM | 5166 | N   | VAL | 56 | 37.099-118.057 | 2.582  | 1.00 | 0.00 |
| N    |      |     |     |    |                |        |      |      |
| ATOM | 5167 | CA  | VAL | 56 | 35.929-117.138 | 2.539  | 1.00 | 0.00 |
| C    |      |     |     |    |                |        |      |      |
| ATOM | 5168 | CB  | VAL | 56 | 34.524-117.837 | 2.862  | 1.00 | 0.00 |
| C    |      |     |     |    |                |        |      |      |
| ATOM | 5169 | CG1 | VAL | 56 | 33.411-116.742 | 2.835  | 1.00 | 0.00 |
| C    |      |     |     |    |                |        |      |      |
| ATOM | 5170 | CG2 | VAL | 56 | 34.124-119.014 | 2.049  | 1.00 | 0.00 |
| C    |      |     |     |    |                |        |      |      |
| ATOM | 5171 | C   | VAL | 56 | 36.121-115.880 | 3.322  | 1.00 | 0.00 |
| C    |      |     |     |    |                |        |      |      |
| ATOM | 5172 | O   | VAL | 56 | 36.393-116.046 | 4.518  | 1.00 | 0.00 |
| O    |      |     |     |    |                |        |      |      |
| ATOM | 5173 | N   | ALA | 57 | 36.029-114.687 | 2.789  | 1.00 | 0.00 |
| N    |      |     |     |    |                |        |      |      |
| ATOM | 5174 | CA  | ALA | 57 | 36.011-113.394 | 3.582  | 1.00 | 0.00 |
| C    |      |     |     |    |                |        |      |      |

|      |      |     |     |    |                |        |      |      |
|------|------|-----|-----|----|----------------|--------|------|------|
| ATOM | 5175 | CB  | ALA | 57 | 36.401-112.171 | 2.697  | 1.00 | 0.00 |
| C    |      |     |     |    |                |        |      |      |
| ATOM | 5176 | C   | ALA | 57 | 34.640-112.998 | 4.288  | 1.00 | 0.00 |
| C    |      |     |     |    |                |        |      |      |
| ATOM | 5177 | O   | ALA | 57 | 33.639-113.156 | 3.561  | 1.00 | 0.00 |
| O    |      |     |     |    |                |        |      |      |
| ATOM | 5178 | N   | PRO | 58 | 34.536-112.653 | 5.611  | 1.00 | 0.00 |
| N    |      |     |     |    |                |        |      |      |
| ATOM | 5179 | CD  | PRO | 58 | 35.660-112.611 | 6.563  | 1.00 | 0.00 |
| C    |      |     |     |    |                |        |      |      |
| ATOM | 5180 | CG  | PRO | 58 | 35.178-112.058 | 7.832  | 1.00 | 0.00 |
| C    |      |     |     |    |                |        |      |      |
| ATOM | 5181 | CB  | PRO | 58 | 33.663-112.161 | 7.648  | 1.00 | 0.00 |
| C    |      |     |     |    |                |        |      |      |
| ATOM | 5182 | CA  | PRO | 58 | 33.248-112.295 | 6.152  | 1.00 | 0.00 |
| C    |      |     |     |    |                |        |      |      |
| ATOM | 5183 | C   | PRO | 58 | 32.538-111.021 | 5.554  | 1.00 | 0.00 |
| C    |      |     |     |    |                |        |      |      |
| ATOM | 5184 | O   | PRO | 58 | 33.106-110.053 | 5.038  | 1.00 | 0.00 |
| O    |      |     |     |    |                |        |      |      |
| ATOM | 5185 | N   | GLY | 59 | 31.270-110.955 | 5.808  | 1.00 | 0.00 |
| N    |      |     |     |    |                |        |      |      |
| ATOM | 5186 | CA  | GLY | 59 | 30.431-109.787 | 5.351  | 1.00 | 0.00 |
| C    |      |     |     |    |                |        |      |      |
| ATOM | 5187 | C   | GLY | 59 | 29.950-109.776 | 3.940  | 1.00 | 0.00 |
| C    |      |     |     |    |                |        |      |      |
| ATOM | 5188 | O   | GLY | 59 | 29.462-108.745 | 3.489  | 1.00 | 0.00 |
| O    |      |     |     |    |                |        |      |      |
| ATOM | 5189 | N   | GLU | 60 | 30.027-110.867 | 3.213  | 1.00 | 0.00 |
| N    |      |     |     |    |                |        |      |      |
| ATOM | 5190 | CA  | GLU | 60 | 29.713-110.870 | 1.774  | 1.00 | 0.00 |
| C    |      |     |     |    |                |        |      |      |
| ATOM | 5191 | CB  | GLU | 60 | 30.987-110.735 | 0.890  | 1.00 | 0.00 |
| C    |      |     |     |    |                |        |      |      |
| ATOM | 5192 | CG  | GLU | 60 | 31.701-109.350 | 0.814  | 1.00 | 0.00 |
| C    |      |     |     |    |                |        |      |      |
| ATOM | 5193 | CD  | GLU | 60 | 30.671-108.190 | 0.490  | 1.00 | 0.00 |
| C    |      |     |     |    |                |        |      |      |
| ATOM | 5194 | OE1 | GLU | 60 | 30.954-107.030 | 0.976  | 1.00 | 0.00 |
| O    |      |     |     |    |                |        |      |      |
| ATOM | 5195 | OE2 | GLU | 60 | 29.734-108.439 | -0.293 | 1.00 | 0.00 |
| O1-  |      |     |     |    |                |        |      |      |
| ATOM | 5196 | C   | GLU | 60 | 29.079-112.200 | 1.384  | 1.00 | 0.00 |
| C    |      |     |     |    |                |        |      |      |
| ATOM | 5197 | O   | GLU | 60 | 29.510-113.246 | 1.842  | 1.00 | 0.00 |
| O    |      |     |     |    |                |        |      |      |
| ATOM | 5198 | N   | ASN | 61 | 28.011-112.170 | 0.606  | 1.00 | 0.00 |
| N    |      |     |     |    |                |        |      |      |
| ATOM | 5199 | CA  | ASN | 61 | 27.309-113.378 | 0.207  | 1.00 | 0.00 |
| C    |      |     |     |    |                |        |      |      |
| ATOM | 5200 | CB  | ASN | 61 | 25.888-113.061 | -0.160 | 1.00 | 0.00 |
| C    |      |     |     |    |                |        |      |      |
| ATOM | 5201 | CG  | ASN | 61 | 24.964-113.075 | 0.996  | 1.00 | 0.00 |
| C    |      |     |     |    |                |        |      |      |

|      |      |     |     |    |                |        |      |      |
|------|------|-----|-----|----|----------------|--------|------|------|
| ATOM | 5202 | OD1 | ASN | 61 | 24.458-114.091 | 1.383  | 1.00 | 0.00 |
| O    |      |     |     |    |                |        |      |      |
| ATOM | 5203 | ND2 | ASN | 61 | 24.777-111.981 | 1.581  | 1.00 | 0.00 |
| N    |      |     |     |    |                |        |      |      |
| ATOM | 5204 | C   | ASN | 61 | 28.146-113.809 | -1.019 | 1.00 | 0.00 |
| C    |      |     |     |    |                |        |      |      |
| ATOM | 5205 | O   | ASN | 61 | 28.080-113.191 | -2.040 | 1.00 | 0.00 |
| O    |      |     |     |    |                |        |      |      |
| ATOM | 5206 | N   | LEU | 62 | 28.889-114.884 | -0.808 | 1.00 | 0.00 |
| N    |      |     |     |    |                |        |      |      |
| ATOM | 5207 | CA  | LEU | 62 | 30.011-115.485 | -1.698 | 1.00 | 0.00 |
| C    |      |     |     |    |                |        |      |      |
| ATOM | 5208 | CB  | LEU | 62 | 31.402-115.476 | -0.900 | 1.00 | 0.00 |
| C    |      |     |     |    |                |        |      |      |
| ATOM | 5209 | CG  | LEU | 62 | 31.884-114.041 | -0.749 | 1.00 | 0.00 |
| C    |      |     |     |    |                |        |      |      |
| ATOM | 5210 | CD1 | LEU | 62 | 33.139-114.111 | 0.128  | 1.00 | 0.00 |
| C    |      |     |     |    |                |        |      |      |
| ATOM | 5211 | CD2 | LEU | 62 | 32.312-113.425 | -2.094 | 1.00 | 0.00 |
| C    |      |     |     |    |                |        |      |      |
| ATOM | 5212 | C   | LEU | 62 | 29.565-116.887 | -2.182 | 1.00 | 0.00 |
| C    |      |     |     |    |                |        |      |      |
| ATOM | 5213 | O   | LEU | 62 | 28.755-117.543 | -1.551 | 1.00 | 0.00 |
| O    |      |     |     |    |                |        |      |      |
| ATOM | 5214 | N   | LYS | 63 | 30.092-117.300 | -3.386 | 1.00 | 0.00 |
| N    |      |     |     |    |                |        |      |      |
| ATOM | 5215 | CA  | LYS | 63 | 29.690-118.458 | -4.204 | 1.00 | 0.00 |
| C    |      |     |     |    |                |        |      |      |
| ATOM | 5216 | CB  | LYS | 63 | 29.361-117.980 | -5.661 | 1.00 | 0.00 |
| C    |      |     |     |    |                |        |      |      |
| ATOM | 5217 | CG  | LYS | 63 | 28.111-117.160 | -5.659 | 1.00 | 0.00 |
| C    |      |     |     |    |                |        |      |      |
| ATOM | 5218 | CD  | LYS | 63 | 27.702-116.427 | -6.974 | 1.00 | 0.00 |
| C    |      |     |     |    |                |        |      |      |
| ATOM | 5219 | CE  | LYS | 63 | 28.708-115.452 | -7.582 | 1.00 | 0.00 |
| C    |      |     |     |    |                |        |      |      |
| ATOM | 5220 | NZ  | LYS | 63 | 28.271-114.071 | -7.242 | 1.00 | 0.00 |
| N1+  |      |     |     |    |                |        |      |      |
| ATOM | 5221 | C   | LYS | 63 | 30.663-119.642 | -4.121 | 1.00 | 0.00 |
| C    |      |     |     |    |                |        |      |      |
| ATOM | 5222 | O   | LYS | 63 | 31.619-119.559 | -4.937 | 1.00 | 0.00 |
| O    |      |     |     |    |                |        |      |      |
| ATOM | 5223 | N   | ILE | 64 | 30.607-120.562 | -3.184 | 1.00 | 0.00 |
| N    |      |     |     |    |                |        |      |      |
| ATOM | 5224 | CA  | ILE | 64 | 31.766-121.467 | -2.767 | 1.00 | 0.00 |
| C    |      |     |     |    |                |        |      |      |
| ATOM | 5225 | CB  | ILE | 64 | 31.579-121.706 | -1.243 | 1.00 | 0.00 |
| C    |      |     |     |    |                |        |      |      |
| ATOM | 5226 | CG2 | ILE | 64 | 32.676-122.599 | -0.691 | 1.00 | 0.00 |
| C    |      |     |     |    |                |        |      |      |
| ATOM | 5227 | CG1 | ILE | 64 | 31.736-120.315 | -0.518 | 1.00 | 0.00 |
| C    |      |     |     |    |                |        |      |      |
| ATOM | 5228 | CD1 | ILE | 64 | 30.398-119.829 | 0.082  | 1.00 | 0.00 |
| C    |      |     |     |    |                |        |      |      |

|      |      |     |     |    |                |         |      |      |
|------|------|-----|-----|----|----------------|---------|------|------|
| ATOM | 5229 | C   | ILE | 64 | 31.593-122.731 | -3.595  | 1.00 | 0.00 |
| C    |      |     |     |    |                |         |      |      |
| ATOM | 5230 | O   | ILE | 64 | 30.548-123.351 | -3.465  | 1.00 | 0.00 |
| O    |      |     |     |    |                |         |      |      |
| ATOM | 5231 | N   | ARG | 65 | 32.618-123.033 | -4.363  | 1.00 | 0.00 |
| N    |      |     |     |    |                |         |      |      |
| ATOM | 5232 | CA  | ARG | 65 | 32.743-124.319 | -5.034  | 1.00 | 0.00 |
| C    |      |     |     |    |                |         |      |      |
| ATOM | 5233 | CB  | ARG | 65 | 33.909-124.381 | -6.095  | 1.00 | 0.00 |
| C    |      |     |     |    |                |         |      |      |
| ATOM | 5234 | CG  | ARG | 65 | 33.751-123.460 | -7.289  | 1.00 | 0.00 |
| C    |      |     |     |    |                |         |      |      |
| ATOM | 5235 | CD  | ARG | 65 | 34.807-123.824 | -8.402  | 1.00 | 0.00 |
| C    |      |     |     |    |                |         |      |      |
| ATOM | 5236 | NE  | ARG | 65 | 34.604-123.101 | -9.711  | 1.00 | 0.00 |
| N    |      |     |     |    |                |         |      |      |
| ATOM | 5237 | CZ  | ARG | 65 | 33.646-123.150 | -10.624 | 1.00 | 0.00 |
| C    |      |     |     |    |                |         |      |      |
| ATOM | 5238 | NH1 | ARG | 65 | 32.686-124.012 | -10.536 | 1.00 | 0.00 |
| N    |      |     |     |    |                |         |      |      |
| ATOM | 5239 | NH2 | ARG | 65 | 33.656-122.427 | -11.757 | 1.00 | 0.00 |
| N1+  |      |     |     |    |                |         |      |      |
| ATOM | 5240 | C   | ARG | 65 | 32.841-125.505 | -4.069  | 1.00 | 0.00 |
| C    |      |     |     |    |                |         |      |      |
| ATOM | 5241 | O   | ARG | 65 | 33.666-125.378 | -3.149  | 1.00 | 0.00 |
| O    |      |     |     |    |                |         |      |      |
| ATOM | 5242 | N   | LEU | 66 | 32.097-126.624 | -4.244  | 1.00 | 0.00 |
| N    |      |     |     |    |                |         |      |      |
| ATOM | 5243 | CA  | LEU | 66 | 32.179-127.834 | -3.353  | 1.00 | 0.00 |
| C    |      |     |     |    |                |         |      |      |
| ATOM | 5244 | CB  | LEU | 66 | 30.756-128.206 | -2.730  | 1.00 | 0.00 |
| C    |      |     |     |    |                |         |      |      |
| ATOM | 5245 | CG  | LEU | 66 | 30.197-127.137 | -1.805  | 1.00 | 0.00 |
| C    |      |     |     |    |                |         |      |      |
| ATOM | 5246 | CD1 | LEU | 66 | 28.828-127.448 | -1.259  | 1.00 | 0.00 |
| C    |      |     |     |    |                |         |      |      |
| ATOM | 5247 | CD2 | LEU | 66 | 31.099-126.989 | -0.593  | 1.00 | 0.00 |
| C    |      |     |     |    |                |         |      |      |
| ATOM | 5248 | C   | LEU | 66 | 32.751-129.063 | -4.230  | 1.00 | 0.00 |
| C    |      |     |     |    |                |         |      |      |
| ATOM | 5249 | O   | LEU | 66 | 32.463-129.134 | -5.436  | 1.00 | 0.00 |
| O    |      |     |     |    |                |         |      |      |
| ATOM | 5250 | N   | LYS | 67 | 33.498-130.033 | -3.627  | 1.00 | 0.00 |
| N    |      |     |     |    |                |         |      |      |
| ATOM | 5251 | CA  | LYS | 67 | 34.182-131.063 | -4.458  | 1.00 | 0.00 |
| C    |      |     |     |    |                |         |      |      |
| ATOM | 5252 | CB  | LYS | 67 | 35.148-131.875 | -3.469  | 1.00 | 0.00 |
| C    |      |     |     |    |                |         |      |      |
| ATOM | 5253 | CG  | LYS | 67 | 36.328-130.976 | -3.406  | 1.00 | 0.00 |
| C    |      |     |     |    |                |         |      |      |
| ATOM | 5254 | CD  | LYS | 67 | 37.444-131.750 | -2.574  | 1.00 | 0.00 |
| C    |      |     |     |    |                |         |      |      |
| ATOM | 5255 | CE  | LYS | 67 | 38.749-130.945 | -2.546  | 1.00 | 0.00 |
| C    |      |     |     |    |                |         |      |      |

|      |      |     |     |    |                |         |      |      |
|------|------|-----|-----|----|----------------|---------|------|------|
| ATOM | 5256 | NZ  | LYS | 67 | 39.744-131.506 | -1.650  | 1.00 | 0.00 |
| N1+  |      |     |     |    |                |         |      |      |
| ATOM | 5257 | C   | LYS | 67 | 33.144-131.981 | -5.262  | 1.00 | 0.00 |
| C    |      |     |     |    |                |         |      |      |
| ATOM | 5258 | O   | LYS | 67 | 32.264-132.664 | -4.660  | 1.00 | 0.00 |
| O    |      |     |     |    |                |         |      |      |
| ATOM | 5259 | N   | GLY | 68 | 33.432-132.142 | -6.541  | 1.00 | 0.00 |
| N    |      |     |     |    |                |         |      |      |
| ATOM | 5260 | CA  | GLY | 68 | 32.506-132.867 | -7.407  | 1.00 | 0.00 |
| C    |      |     |     |    |                |         |      |      |
| ATOM | 5261 | C   | GLY | 68 | 31.045-132.300 | -7.436  | 1.00 | 0.00 |
| C    |      |     |     |    |                |         |      |      |
| ATOM | 5262 | O   | GLY | 68 | 30.623-131.326 | -6.799  | 1.00 | 0.00 |
| O    |      |     |     |    |                |         |      |      |
| ATOM | 5263 | N   | ILE | 69 | 30.207-132.943 | -8.178  | 1.00 | 0.00 |
| N    |      |     |     |    |                |         |      |      |
| ATOM | 5264 | CA  | ILE | 69 | 28.739-132.808 | -8.147  | 1.00 | 0.00 |
| C    |      |     |     |    |                |         |      |      |
| ATOM | 5265 | CB  | ILE | 69 | 27.989-133.261 | -9.430  | 1.00 | 0.00 |
| C    |      |     |     |    |                |         |      |      |
| ATOM | 5266 | CG2 | ILE | 69 | 26.518-132.966 | -9.444  | 1.00 | 0.00 |
| C    |      |     |     |    |                |         |      |      |
| ATOM | 5267 | CG1 | ILE | 69 | 28.618-132.548 | -10.672 | 1.00 | 0.00 |
| C    |      |     |     |    |                |         |      |      |
| ATOM | 5268 | CD1 | ILE | 69 | 28.428-133.230 | -12.002 | 1.00 | 0.00 |
| C    |      |     |     |    |                |         |      |      |
| ATOM | 5269 | C   | ILE | 69 | 28.199-133.684 | -6.923  | 1.00 | 0.00 |
| C    |      |     |     |    |                |         |      |      |
| ATOM | 5270 | O   | ILE | 69 | 28.383-134.896 | -6.909  | 1.00 | 0.00 |
| O    |      |     |     |    |                |         |      |      |
| ATOM | 5271 | N   | GLU | 70 | 27.596-133.027 | -5.915  | 1.00 | 0.00 |
| N    |      |     |     |    |                |         |      |      |
| ATOM | 5272 | CA  | GLU | 70 | 26.921-133.764 | -4.779  | 1.00 | 0.00 |
| C    |      |     |     |    |                |         |      |      |
| ATOM | 5273 | CB  | GLU | 70 | 26.575-132.817 | -3.582  | 1.00 | 0.00 |
| C    |      |     |     |    |                |         |      |      |
| ATOM | 5274 | CG  | GLU | 70 | 27.847-132.468 | -2.841  | 1.00 | 0.00 |
| C    |      |     |     |    |                |         |      |      |
| ATOM | 5275 | CD  | GLU | 70 | 28.528-133.582 | -2.146  | 1.00 | 0.00 |
| C    |      |     |     |    |                |         |      |      |
| ATOM | 5276 | OE1 | GLU | 70 | 27.900-134.526 | -1.661  | 1.00 | 0.00 |
| O    |      |     |     |    |                |         |      |      |
| ATOM | 5277 | OE2 | GLU | 70 | 29.760-133.719 | -2.144  | 1.00 | 0.00 |
| O1-  |      |     |     |    |                |         |      |      |
| ATOM | 5278 | C   | GLU | 70 | 25.614-134.496 | -5.256  | 1.00 | 0.00 |
| C    |      |     |     |    |                |         |      |      |
| ATOM | 5279 | O   | GLU | 70 | 24.777-133.959 | -6.032  | 1.00 | 0.00 |
| O    |      |     |     |    |                |         |      |      |
| ATOM | 5280 | N   | GLU | 71 | 25.528-135.745 | -4.813  | 1.00 | 0.00 |
| N    |      |     |     |    |                |         |      |      |
| ATOM | 5281 | CA  | GLU | 71 | 24.312-136.533 | -4.893  | 1.00 | 0.00 |
| C    |      |     |     |    |                |         |      |      |
| ATOM | 5282 | CB  | GLU | 71 | 24.666-138.051 | -4.819  | 1.00 | 0.00 |
| C    |      |     |     |    |                |         |      |      |

|      |      |     |     |    |                |        |      |      |
|------|------|-----|-----|----|----------------|--------|------|------|
| ATOM | 5283 | CG  | GLU | 71 | 23.586-139.105 | -4.980 | 1.00 | 0.00 |
| C    |      |     |     |    |                |        |      |      |
| ATOM | 5284 | CD  | GLU | 71 | 22.692-138.973 | -6.244 | 1.00 | 0.00 |
| C    |      |     |     |    |                |        |      |      |
| ATOM | 5285 | OE1 | GLU | 71 | 21.535-139.400 | -6.199 | 1.00 | 0.00 |
| O    |      |     |     |    |                |        |      |      |
| ATOM | 5286 | OE2 | GLU | 71 | 23.130-138.517 | -7.331 | 1.00 | 0.00 |
| O1-  |      |     |     |    |                |        |      |      |
| ATOM | 5287 | C   | GLU | 71 | 23.296-136.167 | -3.887 | 1.00 | 0.00 |
| C    |      |     |     |    |                |        |      |      |
| ATOM | 5288 | O   | GLU | 71 | 22.123-136.354 | -4.191 | 1.00 | 0.00 |
| O    |      |     |     |    |                |        |      |      |
| ATOM | 5289 | N   | GLU | 72 | 23.755-135.654 | -2.805 | 1.00 | 0.00 |
| N    |      |     |     |    |                |        |      |      |
| ATOM | 5290 | CA  | GLU | 72 | 22.939-135.183 | -1.688 | 1.00 | 0.00 |
| C    |      |     |     |    |                |        |      |      |
| ATOM | 5291 | CB  | GLU | 72 | 23.758-134.938 | -0.395 | 1.00 | 0.00 |
| C    |      |     |     |    |                |        |      |      |
| ATOM | 5292 | CG  | GLU | 72 | 22.933-134.354 | 0.813  | 1.00 | 0.00 |
| C    |      |     |     |    |                |        |      |      |
| ATOM | 5293 | CD  | GLU | 72 | 21.879-135.374 | 1.280  | 1.00 | 0.00 |
| C    |      |     |     |    |                |        |      |      |
| ATOM | 5294 | OE1 | GLU | 72 | 22.120-136.506 | 1.819  | 1.00 | 0.00 |
| O    |      |     |     |    |                |        |      |      |
| ATOM | 5295 | OE2 | GLU | 72 | 20.689-135.031 | 1.108  | 1.00 | 0.00 |
| O1-  |      |     |     |    |                |        |      |      |
| ATOM | 5296 | C   | GLU | 72 | 22.090-133.921 | -2.151 | 1.00 | 0.00 |
| C    |      |     |     |    |                |        |      |      |
| ATOM | 5297 | O   | GLU | 72 | 22.509-133.170 | -3.046 | 1.00 | 0.00 |
| O    |      |     |     |    |                |        |      |      |
| ATOM | 5298 | N   | GLU | 73 | 20.970-133.666 | -1.495 | 1.00 | 0.00 |
| N    |      |     |     |    |                |        |      |      |
| ATOM | 5299 | CA  | GLU | 73 | 20.135-132.524 | -1.734 | 1.00 | 0.00 |
| C    |      |     |     |    |                |        |      |      |
| ATOM | 5300 | CB  | GLU | 73 | 18.689-132.925 | -1.286 | 1.00 | 0.00 |
| C    |      |     |     |    |                |        |      |      |
| ATOM | 5301 | CG  | GLU | 73 | 17.575-131.873 | -1.381 | 1.00 | 0.00 |
| C    |      |     |     |    |                |        |      |      |
| ATOM | 5302 | CD  | GLU | 73 | 17.315-131.366 | -2.754 | 1.00 | 0.00 |
| C    |      |     |     |    |                |        |      |      |
| ATOM | 5303 | OE1 | GLU | 73 | 18.305-131.391 | -3.553 | 1.00 | 0.00 |
| O    |      |     |     |    |                |        |      |      |
| ATOM | 5304 | OE2 | GLU | 73 | 16.151-131.131 | -3.097 | 1.00 | 0.00 |
| O1-  |      |     |     |    |                |        |      |      |
| ATOM | 5305 | C   | GLU | 73 | 20.626-131.236 | -1.032 | 1.00 | 0.00 |
| C    |      |     |     |    |                |        |      |      |
| ATOM | 5306 | O   | GLU | 73 | 21.213-131.279 | 0.066  | 1.00 | 0.00 |
| O    |      |     |     |    |                |        |      |      |
| ATOM | 5307 | N   | ILE | 74 | 20.428-130.128 | -1.721 | 1.00 | 0.00 |
| N    |      |     |     |    |                |        |      |      |
| ATOM | 5308 | CA  | ILE | 74 | 20.799-128.776 | -1.209 | 1.00 | 0.00 |
| C    |      |     |     |    |                |        |      |      |
| ATOM | 5309 | CB  | ILE | 74 | 22.186-128.323 | -1.682 | 1.00 | 0.00 |
| C    |      |     |     |    |                |        |      |      |



|      |      |     |     |    |                |        |      |      |
|------|------|-----|-----|----|----------------|--------|------|------|
| ATOM | 5310 | CG2 | ILE | 74 | 22.655-127.079 | -0.867 | 1.00 | 0.00 |
| C    |      |     |     |    |                |        |      |      |
| ATOM | 5311 | CG1 | ILE | 74 | 23.312-129.350 | -1.651 | 1.00 | 0.00 |
| C    |      |     |     |    |                |        |      |      |
| ATOM | 5312 | CD1 | ILE | 74 | 24.516-128.979 | -2.582 | 1.00 | 0.00 |
| C    |      |     |     |    |                |        |      |      |
| ATOM | 5313 | C   | ILE | 74 | 19.749-127.729 | -1.407 | 1.00 | 0.00 |
| C    |      |     |     |    |                |        |      |      |
| ATOM | 5314 | O   | ILE | 74 | 19.079-127.810 | -2.440 | 1.00 | 0.00 |
| O    |      |     |     |    |                |        |      |      |
| ATOM | 5315 | N   | LEU | 75 | 19.531-126.847 | -0.455 | 1.00 | 0.00 |
| N    |      |     |     |    |                |        |      |      |
| ATOM | 5316 | CA  | LEU | 75 | 18.513-125.901 | -0.376 | 1.00 | 0.00 |
| C    |      |     |     |    |                |        |      |      |
| ATOM | 5317 | CB  | LEU | 75 | 17.176-126.478 | 0.180  | 1.00 | 0.00 |
| C    |      |     |     |    |                |        |      |      |
| ATOM | 5318 | CG  | LEU | 75 | 16.315-127.230 | -0.841 | 1.00 | 0.00 |
| C    |      |     |     |    |                |        |      |      |
| ATOM | 5319 | CD1 | LEU | 75 | 15.193-128.071 | -0.121 | 1.00 | 0.00 |
| C    |      |     |     |    |                |        |      |      |
| ATOM | 5320 | CD2 | LEU | 75 | 15.541-126.351 | -1.850 | 1.00 | 0.00 |
| C    |      |     |     |    |                |        |      |      |
| ATOM | 5321 | C   | LEU | 75 | 18.788-124.643 | 0.436  | 1.00 | 0.00 |
| C    |      |     |     |    |                |        |      |      |
| ATOM | 5322 | O   | LEU | 75 | 19.757-124.656 | 1.208  | 1.00 | 0.00 |
| O    |      |     |     |    |                |        |      |      |
| ATOM | 5323 | N   | PRO | 76 | 17.949-123.568 | 0.267  | 1.00 | 0.00 |
| N    |      |     |     |    |                |        |      |      |
| ATOM | 5324 | CD  | PRO | 76 | 17.210-123.247 | -0.971 | 1.00 | 0.00 |
| C    |      |     |     |    |                |        |      |      |
| ATOM | 5325 | CG  | PRO | 76 | 17.222-121.697 | -1.075 | 1.00 | 0.00 |
| C    |      |     |     |    |                |        |      |      |
| ATOM | 5326 | CB  | PRO | 76 | 17.079-121.296 | 0.328  | 1.00 | 0.00 |
| C    |      |     |     |    |                |        |      |      |
| ATOM | 5327 | CA  | PRO | 76 | 17.965-122.372 | 1.054  | 1.00 | 0.00 |
| C    |      |     |     |    |                |        |      |      |
| ATOM | 5328 | C   | PRO | 76 | 17.670-122.668 | 2.555  | 1.00 | 0.00 |
| C    |      |     |     |    |                |        |      |      |
| ATOM | 5329 | O   | PRO | 76 | 16.840-123.583 | 2.893  | 1.00 | 0.00 |
| O    |      |     |     |    |                |        |      |      |
| ATOM | 5330 | N   | GLY | 77 | 18.375-122.058 | 3.502  | 1.00 | 0.00 |
| N    |      |     |     |    |                |        |      |      |
| ATOM | 5331 | CA  | GLY | 77 | 18.169-122.237 | 4.950  | 1.00 | 0.00 |
| C    |      |     |     |    |                |        |      |      |
| ATOM | 5332 | C   | GLY | 77 | 18.859-123.501 | 5.526  | 1.00 | 0.00 |
| C    |      |     |     |    |                |        |      |      |
| ATOM | 5333 | O   | GLY | 77 | 18.904-123.609 | 6.764  | 1.00 | 0.00 |
| O    |      |     |     |    |                |        |      |      |
| ATOM | 5334 | N   | PHE | 78 | 19.316-124.475 | 4.728  | 1.00 | 0.00 |
| N    |      |     |     |    |                |        |      |      |
| ATOM | 5335 | CA  | PHE | 78 | 20.367-125.297 | 5.174  | 1.00 | 0.00 |
| C    |      |     |     |    |                |        |      |      |
| ATOM | 5336 | CB  | PHE | 78 | 20.740-126.409 | 4.143  | 1.00 | 0.00 |
| C    |      |     |     |    |                |        |      |      |

|      |      |     |     |    |                |        |      |      |
|------|------|-----|-----|----|----------------|--------|------|------|
| ATOM | 5337 | CG  | PHE | 78 | 19.545-127.326 | 3.731  | 1.00 | 0.00 |
| C    |      |     |     |    |                |        |      |      |
| ATOM | 5338 | CD1 | PHE | 78 | 18.334-127.355 | 4.406  | 1.00 | 0.00 |
| C    |      |     |     |    |                |        |      |      |
| ATOM | 5339 | CE1 | PHE | 78 | 17.358-128.260 | 3.969  | 1.00 | 0.00 |
| C    |      |     |     |    |                |        |      |      |
| ATOM | 5340 | CZ  | PHE | 78 | 17.539-129.080 | 2.860  | 1.00 | 0.00 |
| C    |      |     |     |    |                |        |      |      |
| ATOM | 5341 | CE2 | PHE | 78 | 18.801-129.111 | 2.184  | 1.00 | 0.00 |
| C    |      |     |     |    |                |        |      |      |
| ATOM | 5342 | CD2 | PHE | 78 | 19.819-128.246 | 2.697  | 1.00 | 0.00 |
| C    |      |     |     |    |                |        |      |      |
| ATOM | 5343 | C   | PHE | 78 | 21.673-124.513 | 5.452  | 1.00 | 0.00 |
| C    |      |     |     |    |                |        |      |      |
| ATOM | 5344 | O   | PHE | 78 | 21.869-123.473 | 4.851  | 1.00 | 0.00 |
| O    |      |     |     |    |                |        |      |      |
| ATOM | 5345 | N   | ILE | 79 | 22.521-124.992 | 6.433  | 1.00 | 0.00 |
| N    |      |     |     |    |                |        |      |      |
| ATOM | 5346 | CA  | ILE | 79 | 23.767-124.445 | 6.969  | 1.00 | 0.00 |
| C    |      |     |     |    |                |        |      |      |
| ATOM | 5347 | CB  | ILE | 79 | 23.564-123.998 | 8.478  | 1.00 | 0.00 |
| C    |      |     |     |    |                |        |      |      |
| ATOM | 5348 | CG2 | ILE | 79 | 24.666-123.027 | 8.927  | 1.00 | 0.00 |
| C    |      |     |     |    |                |        |      |      |
| ATOM | 5349 | CG1 | ILE | 79 | 22.148-123.449 | 8.731  | 1.00 | 0.00 |
| C    |      |     |     |    |                |        |      |      |
| ATOM | 5350 | CD1 | ILE | 79 | 21.812-122.737 | 9.997  | 1.00 | 0.00 |
| C    |      |     |     |    |                |        |      |      |
| ATOM | 5351 | C   | ILE | 79 | 25.013-125.347 | 6.867  | 1.00 | 0.00 |
| C    |      |     |     |    |                |        |      |      |
| ATOM | 5352 | O   | ILE | 79 | 24.910-126.496 | 7.325  | 1.00 | 0.00 |
| O    |      |     |     |    |                |        |      |      |
| ATOM | 5353 | N   | LEU | 80 | 26.162-124.791 | 6.466  | 1.00 | 0.00 |
| N    |      |     |     |    |                |        |      |      |
| ATOM | 5354 | CA  | LEU | 80 | 27.476-125.488 | 6.578  | 1.00 | 0.00 |
| C    |      |     |     |    |                |        |      |      |
| ATOM | 5355 | CB  | LEU | 80 | 28.461-125.148 | 5.478  | 1.00 | 0.00 |
| C    |      |     |     |    |                |        |      |      |
| ATOM | 5356 | CG  | LEU | 80 | 27.967-125.270 | 3.992  | 1.00 | 0.00 |
| C    |      |     |     |    |                |        |      |      |
| ATOM | 5357 | CD1 | LEU | 80 | 29.002-124.858 | 2.966  | 1.00 | 0.00 |
| C    |      |     |     |    |                |        |      |      |
| ATOM | 5358 | CD2 | LEU | 80 | 27.516-126.704 | 3.563  | 1.00 | 0.00 |
| C    |      |     |     |    |                |        |      |      |
| ATOM | 5359 | C   | LEU | 80 | 27.971-125.192 | 8.016  | 1.00 | 0.00 |
| C    |      |     |     |    |                |        |      |      |
| ATOM | 5360 | O   | LEU | 80 | 28.205-124.039 | 8.380  | 1.00 | 0.00 |
| O    |      |     |     |    |                |        |      |      |
| ATOM | 5361 | N   | CYX | 81 | 28.020-126.194 | 8.878  | 1.00 | 0.00 |
| N    |      |     |     |    |                |        |      |      |
| ATOM | 5362 | CA  | CYX | 81 | 28.514-126.081 | 10.221 | 1.00 | 0.00 |
| C    |      |     |     |    |                |        |      |      |
| ATOM | 5363 | CB  | CYX | 81 | 27.501-126.698 | 11.213 | 1.00 | 0.00 |
| C    |      |     |     |    |                |        |      |      |

|      |      |     |     |    |                |        |      |      |
|------|------|-----|-----|----|----------------|--------|------|------|
| ATOM | 5364 | SG  | CYX | 81 | 25.754-126.179 | 10.935 | 1.00 | 0.00 |
| S    |      |     |     |    |                |        |      |      |
| ATOM | 5365 | C   | CYX | 81 | 29.956-126.702 | 10.348 | 1.00 | 0.00 |
| C    |      |     |     |    |                |        |      |      |
| ATOM | 5366 | O   | CYX | 81 | 30.337-127.512 | 9.537  | 1.00 | 0.00 |
| O    |      |     |     |    |                |        |      |      |
| ATOM | 5367 | N   | ASP | 82 | 30.635-126.506 | 11.497 | 1.00 | 0.00 |
| N    |      |     |     |    |                |        |      |      |
| ATOM | 5368 | CA  | ASP | 82 | 31.737-127.305 | 12.059 | 1.00 | 0.00 |
| C    |      |     |     |    |                |        |      |      |
| ATOM | 5369 | CB  | ASP | 82 | 32.294-126.569 | 13.346 | 1.00 | 0.00 |
| C    |      |     |     |    |                |        |      |      |
| ATOM | 5370 | CG  | ASP | 82 | 33.540-127.125 | 14.042 | 1.00 | 0.00 |
| C    |      |     |     |    |                |        |      |      |
| ATOM | 5371 | OD1 | ASP | 82 | 33.991-126.568 | 15.046 | 1.00 | 0.00 |
| O    |      |     |     |    |                |        |      |      |
| ATOM | 5372 | OD2 | ASP | 82 | 34.108-128.063 | 13.560 | 1.00 | 0.00 |
| O1-  |      |     |     |    |                |        |      |      |
| ATOM | 5373 | C   | ASP | 82 | 31.213-128.706 | 12.481 | 1.00 | 0.00 |
| C    |      |     |     |    |                |        |      |      |
| ATOM | 5374 | O   | ASP | 82 | 30.338-128.811 | 13.406 | 1.00 | 0.00 |
| O    |      |     |     |    |                |        |      |      |
| ATOM | 5375 | N   | PRO | 83 | 31.883-129.795 | 11.982 | 1.00 | 0.00 |
| N    |      |     |     |    |                |        |      |      |
| ATOM | 5376 | CD  | PRO | 83 | 32.800-129.753 | 10.808 | 1.00 | 0.00 |
| C    |      |     |     |    |                |        |      |      |
| ATOM | 5377 | CG  | PRO | 83 | 32.862-131.091 | 10.302 | 1.00 | 0.00 |
| C    |      |     |     |    |                |        |      |      |
| ATOM | 5378 | CB  | PRO | 83 | 32.555-131.984 | 11.482 | 1.00 | 0.00 |
| C    |      |     |     |    |                |        |      |      |
| ATOM | 5379 | CA  | PRO | 83 | 31.579-131.201 | 12.265 | 1.00 | 0.00 |
| C    |      |     |     |    |                |        |      |      |
| ATOM | 5380 | C   | PRO | 83 | 31.681-131.449 | 13.800 | 1.00 | 0.00 |
| C    |      |     |     |    |                |        |      |      |
| ATOM | 5381 | O   | PRO | 83 | 31.042-132.303 | 14.411 | 1.00 | 0.00 |
| O    |      |     |     |    |                |        |      |      |
| ATOM | 5382 | N   | ASN | 84 | 32.425-130.596 | 14.497 | 1.00 | 0.00 |
| N    |      |     |     |    |                |        |      |      |
| ATOM | 5383 | CA  | ASN | 84 | 32.806-130.696 | 15.891 | 1.00 | 0.00 |
| C    |      |     |     |    |                |        |      |      |
| ATOM | 5384 | CB  | ASN | 84 | 34.301-130.285 | 16.091 | 1.00 | 0.00 |
| C    |      |     |     |    |                |        |      |      |
| ATOM | 5385 | CG  | ASN | 84 | 35.248-131.120 | 15.232 | 1.00 | 0.00 |
| C    |      |     |     |    |                |        |      |      |
| ATOM | 5386 | OD1 | ASN | 84 | 35.752-132.212 | 15.624 | 1.00 | 0.00 |
| O    |      |     |     |    |                |        |      |      |
| ATOM | 5387 | ND2 | ASN | 84 | 35.548-130.605 | 14.011 | 1.00 | 0.00 |
| N    |      |     |     |    |                |        |      |      |
| ATOM | 5388 | C   | ASN | 84 | 31.943-129.879 | 16.900 | 1.00 | 0.00 |
| C    |      |     |     |    |                |        |      |      |
| ATOM | 5389 | O   | ASN | 84 | 32.101-130.032 | 18.138 | 1.00 | 0.00 |
| O    |      |     |     |    |                |        |      |      |
| ATOM | 5390 | N   | ASN | 85 | 31.061-129.114 | 16.396 | 1.00 | 0.00 |
| N    |      |     |     |    |                |        |      |      |

|      |      |     |     |    |                |        |      |      |
|------|------|-----|-----|----|----------------|--------|------|------|
| ATOM | 5391 | CA  | ASN | 85 | 30.188-128.066 | 16.987 | 1.00 | 0.00 |
| C    |      |     |     |    |                |        |      |      |
| ATOM | 5392 | CB  | ASN | 85 | 31.061-126.787 | 17.338 | 1.00 | 0.00 |
| C    |      |     |     |    |                |        |      |      |
| ATOM | 5393 | CG  | ASN | 85 | 30.311-125.827 | 18.234 | 1.00 | 0.00 |
| C    |      |     |     |    |                |        |      |      |
| ATOM | 5394 | OD1 | ASN | 85 | 29.382-125.140 | 17.802 | 1.00 | 0.00 |
| O    |      |     |     |    |                |        |      |      |
| ATOM | 5395 | ND2 | ASN | 85 | 30.660-125.793 | 19.479 | 1.00 | 0.00 |
| N    |      |     |     |    |                |        |      |      |
| ATOM | 5396 | C   | ASN | 85 | 28.913-127.822 | 16.129 | 1.00 | 0.00 |
| C    |      |     |     |    |                |        |      |      |
| ATOM | 5397 | O   | ASN | 85 | 28.737-126.700 | 15.622 | 1.00 | 0.00 |
| O    |      |     |     |    |                |        |      |      |
| ATOM | 5398 | N   | LEU | 86 | 28.142-128.859 | 15.790 | 1.00 | 0.00 |
| N    |      |     |     |    |                |        |      |      |
| ATOM | 5399 | CA  | LEU | 86 | 26.932-128.817 | 14.948 | 1.00 | 0.00 |
| C    |      |     |     |    |                |        |      |      |
| ATOM | 5400 | CB  | LEU | 86 | 26.138-130.148 | 14.965 | 1.00 | 0.00 |
| C    |      |     |     |    |                |        |      |      |
| ATOM | 5401 | CG  | LEU | 86 | 27.001-131.432 | 14.740 | 1.00 | 0.00 |
| C    |      |     |     |    |                |        |      |      |
| ATOM | 5402 | CD1 | LEU | 86 | 26.017-132.629 | 14.577 | 1.00 | 0.00 |
| C    |      |     |     |    |                |        |      |      |
| ATOM | 5403 | CD2 | LEU | 86 | 27.833-131.254 | 13.426 | 1.00 | 0.00 |
| C    |      |     |     |    |                |        |      |      |
| ATOM | 5404 | C   | LEU | 86 | 26.013-127.657 | 15.281 | 1.00 | 0.00 |
| C    |      |     |     |    |                |        |      |      |
| ATOM | 5405 | O   | LEU | 86 | 26.025-127.111 | 16.393 | 1.00 | 0.00 |
| O    |      |     |     |    |                |        |      |      |
| ATOM | 5406 | N   | CYX | 87 | 25.256-127.309 | 14.268 | 1.00 | 0.00 |
| N    |      |     |     |    |                |        |      |      |
| ATOM | 5407 | CA  | CYX | 87 | 24.115-126.494 | 14.417 | 1.00 | 0.00 |
| C    |      |     |     |    |                |        |      |      |
| ATOM | 5408 | CB  | CYX | 87 | 23.754-125.835 | 13.080 | 1.00 | 0.00 |
| C    |      |     |     |    |                |        |      |      |
| ATOM | 5409 | SG  | CYX | 87 | 25.229-124.977 | 12.512 | 1.00 | 0.00 |
| S    |      |     |     |    |                |        |      |      |
| ATOM | 5410 | C   | CYX | 87 | 22.906-127.280 | 14.969 | 1.00 | 0.00 |
| C    |      |     |     |    |                |        |      |      |
| ATOM | 5411 | O   | CYX | 87 | 22.653-128.409 | 14.536 | 1.00 | 0.00 |
| O    |      |     |     |    |                |        |      |      |
| ATOM | 5412 | N   | HIE | 88 | 22.138-126.651 | 15.844 | 1.00 | 0.00 |
| N    |      |     |     |    |                |        |      |      |
| ATOM | 5413 | CA  | HIE | 88 | 20.995-127.352 | 16.385 | 1.00 | 0.00 |
| C    |      |     |     |    |                |        |      |      |
| ATOM | 5414 | CB  | HIE | 88 | 20.424-126.693 | 17.613 | 1.00 | 0.00 |
| C    |      |     |     |    |                |        |      |      |
| ATOM | 5415 | CG  | HIE | 88 | 21.433-126.294 | 18.571 | 1.00 | 0.00 |
| C    |      |     |     |    |                |        |      |      |
| ATOM | 5416 | ND1 | HIE | 88 | 21.924-127.116 | 19.524 | 1.00 | 0.00 |
| N    |      |     |     |    |                |        |      |      |
| ATOM | 5417 | CE1 | HIE | 88 | 22.843-126.395 | 20.194 | 1.00 | 0.00 |
| C    |      |     |     |    |                |        |      |      |

|      |      |     |     |    |                |        |      |      |
|------|------|-----|-----|----|----------------|--------|------|------|
| ATOM | 5418 | NE2 | HIE | 88 | 22.979-125.207 | 19.645 | 1.00 | 0.00 |
| N    |      |     |     |    |                |        |      |      |
| ATOM | 5419 | CD2 | HIE | 88 | 22.041-125.109 | 18.681 | 1.00 | 0.00 |
| C    |      |     |     |    |                |        |      |      |
| ATOM | 5420 | C   | HIE | 88 | 19.919-127.674 | 15.332 | 1.00 | 0.00 |
| C    |      |     |     |    |                |        |      |      |
| ATOM | 5421 | O   | HIE | 88 | 20.005-127.148 | 14.258 | 1.00 | 0.00 |
| O    |      |     |     |    |                |        |      |      |
| ATOM | 5422 | N   | SER | 89 | 18.905-128.477 | 15.568 | 1.00 | 0.00 |
| N    |      |     |     |    |                |        |      |      |
| ATOM | 5423 | CA  | SER | 89 | 17.718-128.625 | 14.731 | 1.00 | 0.00 |
| C    |      |     |     |    |                |        |      |      |
| ATOM | 5424 | CB  | SER | 89 | 18.106-129.739 | 13.680 | 1.00 | 0.00 |
| C    |      |     |     |    |                |        |      |      |
| ATOM | 5425 | OG  | SER | 89 | 17.077-130.085 | 12.778 | 1.00 | 0.00 |
| O    |      |     |     |    |                |        |      |      |
| ATOM | 5426 | C   | SER | 89 | 16.414-129.040 | 15.455 | 1.00 | 0.00 |
| C    |      |     |     |    |                |        |      |      |
| ATOM | 5427 | O   | SER | 89 | 16.437-129.637 | 16.548 | 1.00 | 0.00 |
| O    |      |     |     |    |                |        |      |      |
| ATOM | 5428 | N   | GLY | 90 | 15.350-128.749 | 14.772 | 1.00 | 0.00 |
| N    |      |     |     |    |                |        |      |      |
| ATOM | 5429 | CA  | GLY | 90 | 14.021-129.291 | 15.189 | 1.00 | 0.00 |
| C    |      |     |     |    |                |        |      |      |
| ATOM | 5430 | C   | GLY | 90 | 12.883-128.523 | 14.663 | 1.00 | 0.00 |
| C    |      |     |     |    |                |        |      |      |
| ATOM | 5431 | O   | GLY | 90 | 12.964-127.870 | 13.584 | 1.00 | 0.00 |
| O    |      |     |     |    |                |        |      |      |
| ATOM | 5432 | N   | ARG | 91 | 11.750-128.611 | 15.439 | 1.00 | 0.00 |
| N    |      |     |     |    |                |        |      |      |
| ATOM | 5433 | CA  | ARG | 91 | 10.463-128.118 | 14.989 | 1.00 | 0.00 |
| C    |      |     |     |    |                |        |      |      |
| ATOM | 5434 | CB  | ARG | 91 | 9.644-129.186  | 14.262 | 1.00 | 0.00 |
| C    |      |     |     |    |                |        |      |      |
| ATOM | 5435 | CG  | ARG | 91 | 9.329-130.336  | 15.122 | 1.00 | 0.00 |
| C    |      |     |     |    |                |        |      |      |
| ATOM | 5436 | CD  | ARG | 91 | 8.395-131.319  | 14.397 | 1.00 | 0.00 |
| C    |      |     |     |    |                |        |      |      |
| ATOM | 5437 | NE  | ARG | 91 | 6.992-130.793  | 14.552 | 1.00 | 0.00 |
| N    |      |     |     |    |                |        |      |      |
| ATOM | 5438 | CZ  | ARG | 91 | 6.167-131.026  | 15.555 | 1.00 | 0.00 |
| C    |      |     |     |    |                |        |      |      |
| ATOM | 5439 | NH1 | ARG | 91 | 6.468-131.764  | 16.599 | 1.00 | 0.00 |
| N    |      |     |     |    |                |        |      |      |
| ATOM | 5440 | NH2 | ARG | 91 | 5.015-130.422  | 15.517 | 1.00 | 0.00 |
| N1+  |      |     |     |    |                |        |      |      |
| ATOM | 5441 | C   | ARG | 91 | 9.635-127.252  | 15.902 | 1.00 | 0.00 |
| C    |      |     |     |    |                |        |      |      |
| ATOM | 5442 | O   | ARG | 91 | 8.529-126.808  | 15.495 | 1.00 | 0.00 |
| O    |      |     |     |    |                |        |      |      |
| ATOM | 5443 | N   | THR | 92 | 10.079-126.969 | 17.093 | 1.00 | 0.00 |
| N    |      |     |     |    |                |        |      |      |
| ATOM | 5444 | CA  | THR | 92 | 9.375-126.144  | 18.058 | 1.00 | 0.00 |
| C    |      |     |     |    |                |        |      |      |

|      |      |     |     |    |                |        |      |      |
|------|------|-----|-----|----|----------------|--------|------|------|
| ATOM | 5445 | CB  | THR | 92 | 8.503-127.005  | 19.008 | 1.00 | 0.00 |
| C    |      |     |     |    |                |        |      |      |
| ATOM | 5446 | CG2 | THR | 92 | 7.135-127.604  | 18.484 | 1.00 | 0.00 |
| C    |      |     |     |    |                |        |      |      |
| ATOM | 5447 | OG1 | THR | 92 | 9.117-128.217  | 19.455 | 1.00 | 0.00 |
| O    |      |     |     |    |                |        |      |      |
| ATOM | 5448 | C   | THR | 92 | 10.332-125.282 | 18.851 | 1.00 | 0.00 |
| C    |      |     |     |    |                |        |      |      |
| ATOM | 5449 | O   | THR | 92 | 11.350-125.813 | 19.326 | 1.00 | 0.00 |
| O    |      |     |     |    |                |        |      |      |
| ATOM | 5450 | N   | PHE | 93 | 10.059-124.029 | 19.073 | 1.00 | 0.00 |
| N    |      |     |     |    |                |        |      |      |
| ATOM | 5451 | CA  | PHE | 93 | 10.917-123.187 | 19.893 | 1.00 | 0.00 |
| C    |      |     |     |    |                |        |      |      |
| ATOM | 5452 | CB  | PHE | 93 | 12.052-122.543 | 19.108 | 1.00 | 0.00 |
| C    |      |     |     |    |                |        |      |      |
| ATOM | 5453 | CG  | PHE | 93 | 11.603-121.842 | 17.820 | 1.00 | 0.00 |
| C    |      |     |     |    |                |        |      |      |
| ATOM | 5454 | CD1 | PHE | 93 | 11.291-120.455 | 17.825 | 1.00 | 0.00 |
| C    |      |     |     |    |                |        |      |      |
| ATOM | 5455 | CE1 | PHE | 93 | 11.045-119.841 | 16.561 | 1.00 | 0.00 |
| C    |      |     |     |    |                |        |      |      |
| ATOM | 5456 | CZ  | PHE | 93 | 11.106-120.631 | 15.328 | 1.00 | 0.00 |
| C    |      |     |     |    |                |        |      |      |
| ATOM | 5457 | CE2 | PHE | 93 | 11.332-122.009 | 15.455 | 1.00 | 0.00 |
| C    |      |     |     |    |                |        |      |      |
| ATOM | 5458 | CD2 | PHE | 93 | 11.531-122.666 | 16.652 | 1.00 | 0.00 |
| C    |      |     |     |    |                |        |      |      |
| ATOM | 5459 | C   | PHE | 93 | 10.144-122.152 | 20.752 | 1.00 | 0.00 |
| C    |      |     |     |    |                |        |      |      |
| ATOM | 5460 | O   | PHE | 93 | 8.997-121.822  | 20.471 | 1.00 | 0.00 |
| O    |      |     |     |    |                |        |      |      |
| ATOM | 5461 | N   | ASP | 94 | 10.911-121.560 | 21.665 | 1.00 | 0.00 |
| N    |      |     |     |    |                |        |      |      |
| ATOM | 5462 | CA  | ASP | 94 | 10.447-120.464 | 22.594 | 1.00 | 0.00 |
| C    |      |     |     |    |                |        |      |      |
| ATOM | 5463 | CB  | ASP | 94 | 10.864-120.766 | 24.044 | 1.00 | 0.00 |
| C    |      |     |     |    |                |        |      |      |
| ATOM | 5464 | CG  | ASP | 94 | 9.861-121.679  | 24.736 | 1.00 | 0.00 |
| C    |      |     |     |    |                |        |      |      |
| ATOM | 5465 | OD1 | ASP | 94 | 10.171-122.411 | 25.740 | 1.00 | 0.00 |
| O    |      |     |     |    |                |        |      |      |
| ATOM | 5466 | OD2 | ASP | 94 | 8.663-121.543  | 24.513 | 1.00 | 0.00 |
| O1-  |      |     |     |    |                |        |      |      |
| ATOM | 5467 | C   | ASP | 94 | 11.045-119.145 | 22.186 | 1.00 | 0.00 |
| C    |      |     |     |    |                |        |      |      |
| ATOM | 5468 | O   | ASP | 94 | 12.229-119.091 | 21.824 | 1.00 | 0.00 |
| O    |      |     |     |    |                |        |      |      |
| ATOM | 5469 | N   | ALA | 95 | 10.246-118.046 | 22.335 | 1.00 | 0.00 |
| N    |      |     |     |    |                |        |      |      |
| ATOM | 5470 | CA  | ALA | 95 | 10.764-116.777 | 21.819 | 1.00 | 0.00 |
| C    |      |     |     |    |                |        |      |      |
| ATOM | 5471 | CB  | ALA | 95 | 10.445-116.679 | 20.342 | 1.00 | 0.00 |
| C    |      |     |     |    |                |        |      |      |

|      |      |     |     |    |                |        |      |      |
|------|------|-----|-----|----|----------------|--------|------|------|
| ATOM | 5472 | C   | ALA | 95 | 10.186-115.502 | 22.548 | 1.00 | 0.00 |
| C    |      |     |     |    |                |        |      |      |
| ATOM | 5473 | O   | ALA | 95 | 9.063-115.538  | 23.058 | 1.00 | 0.00 |
| O    |      |     |     |    |                |        |      |      |
| ATOM | 5474 | N   | GLN | 96 | 10.894-114.370 | 22.455 | 1.00 | 0.00 |
| N    |      |     |     |    |                |        |      |      |
| ATOM | 5475 | CA  | GLN | 96 | 10.312-113.067 | 22.517 | 1.00 | 0.00 |
| C    |      |     |     |    |                |        |      |      |
| ATOM | 5476 | CB  | GLN | 96 | 11.390-112.139 | 23.069 | 1.00 | 0.00 |
| C    |      |     |     |    |                |        |      |      |
| ATOM | 5477 | CG  | GLN | 96 | 11.914-112.599 | 24.467 | 1.00 | 0.00 |
| C    |      |     |     |    |                |        |      |      |
| ATOM | 5478 | CD  | GLN | 96 | 12.317-111.336 | 25.180 | 1.00 | 0.00 |
| C    |      |     |     |    |                |        |      |      |
| ATOM | 5479 | OE1 | GLN | 96 | 13.059-110.545 | 24.645 | 1.00 | 0.00 |
| O    |      |     |     |    |                |        |      |      |
| ATOM | 5480 | NE2 | GLN | 96 | 11.889-111.071 | 26.409 | 1.00 | 0.00 |
| N    |      |     |     |    |                |        |      |      |
| ATOM | 5481 | C   | GLN | 96 | 9.881-112.573  | 21.106 | 1.00 | 0.00 |
| C    |      |     |     |    |                |        |      |      |
| ATOM | 5482 | O   | GLN | 96 | 10.628-112.811 | 20.119 | 1.00 | 0.00 |
| O    |      |     |     |    |                |        |      |      |
| ATOM | 5483 | N   | ILE | 97 | 8.721-111.942  | 20.976 | 1.00 | 0.00 |
| N    |      |     |     |    |                |        |      |      |
| ATOM | 5484 | CA  | ILE | 97 | 8.266-111.274  | 19.784 | 1.00 | 0.00 |
| C    |      |     |     |    |                |        |      |      |
| ATOM | 5485 | CB  | ILE | 97 | 7.036-111.934  | 19.030 | 1.00 | 0.00 |
| C    |      |     |     |    |                |        |      |      |
| ATOM | 5486 | CG2 | ILE | 97 | 7.474-113.323  | 18.392 | 1.00 | 0.00 |
| C    |      |     |     |    |                |        |      |      |
| ATOM | 5487 | CG1 | ILE | 97 | 5.773-111.879  | 19.818 | 1.00 | 0.00 |
| C    |      |     |     |    |                |        |      |      |
| ATOM | 5488 | CD1 | ILE | 97 | 4.536-112.544  | 19.255 | 1.00 | 0.00 |
| C    |      |     |     |    |                |        |      |      |
| ATOM | 5489 | C   | ILE | 97 | 7.948-109.743  | 20.084 | 1.00 | 0.00 |
| C    |      |     |     |    |                |        |      |      |
| ATOM | 5490 | O   | ILE | 97 | 7.636-109.311  | 21.214 | 1.00 | 0.00 |
| O    |      |     |     |    |                |        |      |      |
| ATOM | 5491 | N   | VAL | 98 | 8.176-108.983  | 19.030 | 1.00 | 0.00 |
| N    |      |     |     |    |                |        |      |      |
| ATOM | 5492 | CA  | VAL | 98 | 7.735-107.570  | 18.902 | 1.00 | 0.00 |
| C    |      |     |     |    |                |        |      |      |
| ATOM | 5493 | CB  | VAL | 98 | 8.869-106.606  | 18.808 | 1.00 | 0.00 |
| C    |      |     |     |    |                |        |      |      |
| ATOM | 5494 | CG1 | VAL | 98 | 9.854-106.988  | 17.643 | 1.00 | 0.00 |
| C    |      |     |     |    |                |        |      |      |
| ATOM | 5495 | CG2 | VAL | 98 | 8.332-105.142  | 18.733 | 1.00 | 0.00 |
| C    |      |     |     |    |                |        |      |      |
| ATOM | 5496 | C   | VAL | 98 | 6.824-107.408  | 17.691 | 1.00 | 0.00 |
| C    |      |     |     |    |                |        |      |      |
| ATOM | 5497 | O   | VAL | 98 | 7.087-107.847  | 16.570 | 1.00 | 0.00 |
| O    |      |     |     |    |                |        |      |      |
| ATOM | 5498 | N   | ILE | 99 | 5.636-106.837  | 18.063 | 1.00 | 0.00 |
| N    |      |     |     |    |                |        |      |      |

|      |      |     |     |     |                |        |      |      |
|------|------|-----|-----|-----|----------------|--------|------|------|
| ATOM | 5499 | CA  | ILE | 99  | 4.467-106.829  | 17.124 | 1.00 | 0.00 |
| C    |      |     |     |     |                |        |      |      |
| ATOM | 5500 | CB  | ILE | 99  | 3.110-106.781  | 17.842 | 1.00 | 0.00 |
| C    |      |     |     |     |                |        |      |      |
| ATOM | 5501 | CG2 | ILE | 99  | 1.979-106.798  | 16.882 | 1.00 | 0.00 |
| C    |      |     |     |     |                |        |      |      |
| ATOM | 5502 | CG1 | ILE | 99  | 3.036-107.888  | 18.850 | 1.00 | 0.00 |
| C    |      |     |     |     |                |        |      |      |
| ATOM | 5503 | CD1 | ILE | 99  | 3.395-109.288  | 18.507 | 1.00 | 0.00 |
| C    |      |     |     |     |                |        |      |      |
| ATOM | 5504 | C   | ILE | 99  | 4.642-105.613  | 16.227 | 1.00 | 0.00 |
| C    |      |     |     |     |                |        |      |      |
| ATOM | 5505 | O   | ILE | 99  | 5.167-104.578  | 16.588 | 1.00 | 0.00 |
| O    |      |     |     |     |                |        |      |      |
| ATOM | 5506 | N   | ILE | 100 | 4.374-105.824  | 14.942 | 1.00 | 0.00 |
| N    |      |     |     |     |                |        |      |      |
| ATOM | 5507 | CA  | ILE | 100 | 4.418-104.778  | 13.917 | 1.00 | 0.00 |
| C    |      |     |     |     |                |        |      |      |
| ATOM | 5508 | CB  | ILE | 100 | 5.514-105.140  | 12.868 | 1.00 | 0.00 |
| C    |      |     |     |     |                |        |      |      |
| ATOM | 5509 | CG2 | ILE | 100 | 5.486-104.266  | 11.685 | 1.00 | 0.00 |
| C    |      |     |     |     |                |        |      |      |
| ATOM | 5510 | CG1 | ILE | 100 | 6.945-105.087  | 13.590 | 1.00 | 0.00 |
| C    |      |     |     |     |                |        |      |      |
| ATOM | 5511 | CD1 | ILE | 100 | 8.252-105.401  | 12.791 | 1.00 | 0.00 |
| C    |      |     |     |     |                |        |      |      |
| ATOM | 5512 | C   | ILE | 100 | 3.057-104.501  | 13.322 | 1.00 | 0.00 |
| C    |      |     |     |     |                |        |      |      |
| ATOM | 5513 | O   | ILE | 100 | 2.253-105.435  | 13.122 | 1.00 | 0.00 |
| O    |      |     |     |     |                |        |      |      |
| ATOM | 5514 | N   | GLU | 101 | 2.678-103.273  | 12.973 | 1.00 | 0.00 |
| N    |      |     |     |     |                |        |      |      |
| ATOM | 5515 | CA  | GLU | 101 | 1.325-103.020  | 12.463 | 1.00 | 0.00 |
| C    |      |     |     |     |                |        |      |      |
| ATOM | 5516 | CB  | GLU | 101 | 1.165-101.519  | 12.272 | 1.00 | 0.00 |
| C    |      |     |     |     |                |        |      |      |
| ATOM | 5517 | CG  | GLU | 101 | -0.078-100.924 | 11.668 | 1.00 | 0.00 |
| C    |      |     |     |     |                |        |      |      |
| ATOM | 5518 | CD  | GLU | 101 | -1.423-101.179 | 12.336 | 1.00 | 0.00 |
| C    |      |     |     |     |                |        |      |      |
| ATOM | 5519 | OE1 | GLU | 101 | -2.398-100.397 | 12.202 | 1.00 | 0.00 |
| O    |      |     |     |     |                |        |      |      |
| ATOM | 5520 | OE2 | GLU | 101 | -1.519-102.165 | 13.091 | 1.00 | 0.00 |
| O1-  |      |     |     |     |                |        |      |      |
| ATOM | 5521 | C   | GLU | 101 | 1.033-103.642  | 11.094 | 1.00 | 0.00 |
| C    |      |     |     |     |                |        |      |      |
| ATOM | 5522 | O   | GLU | 101 | 1.846-103.671  | 10.174 | 1.00 | 0.00 |
| O    |      |     |     |     |                |        |      |      |
| ATOM | 5523 | N   | HIE | 102 | -0.179-104.138 | 10.839 | 1.00 | 0.00 |
| N    |      |     |     |     |                |        |      |      |
| ATOM | 5524 | CA  | HIE | 102 | -0.459-105.000 | 9.660  | 1.00 | 0.00 |
| C    |      |     |     |     |                |        |      |      |
| ATOM | 5525 | CB  | HIE | 102 | 0.078-106.363  | 9.903  | 1.00 | 0.00 |
| C    |      |     |     |     |                |        |      |      |



|      |      |     |     |     |                |        |      |      |
|------|------|-----|-----|-----|----------------|--------|------|------|
| ATOM | 5526 | CG  | HIE | 102 | -0.017-107.347 | 8.734  | 1.00 | 0.00 |
| C    |      |     |     |     |                |        |      |      |
| ATOM | 5527 | ND1 | HIE | 102 | -0.882-108.430 | 8.602  | 1.00 | 0.00 |
| N    |      |     |     |     |                |        |      |      |
| ATOM | 5528 | CE1 | HIE | 102 | -0.385-109.176 | 7.558  | 1.00 | 0.00 |
| C    |      |     |     |     |                |        |      |      |
| ATOM | 5529 | NE2 | HIE | 102 | 0.613-108.489  | 6.973  | 1.00 | 0.00 |
| N    |      |     |     |     |                |        |      |      |
| ATOM | 5530 | CD2 | HIE | 102 | 0.910-107.384  | 7.750  | 1.00 | 0.00 |
| C    |      |     |     |     |                |        |      |      |
| ATOM | 5531 | C   | HIE | 102 | -1.923-104.929 | 9.262  | 1.00 | 0.00 |
| C    |      |     |     |     |                |        |      |      |
| ATOM | 5532 | O   | HIE | 102 | -2.755-104.450 | 10.076 | 1.00 | 0.00 |
| O    |      |     |     |     |                |        |      |      |
| ATOM | 5533 | N   | LYS | 103 | -2.311-105.517 | 8.186  | 1.00 | 0.00 |
| N    |      |     |     |     |                |        |      |      |
| ATOM | 5534 | CA  | LYS | 103 | -3.719-105.568 | 7.805  | 1.00 | 0.00 |
| C    |      |     |     |     |                |        |      |      |
| ATOM | 5535 | CB  | LYS | 103 | -3.847-106.111 | 6.365  | 1.00 | 0.00 |
| C    |      |     |     |     |                |        |      |      |
| ATOM | 5536 | CG  | LYS | 103 | -3.167-107.517 | 6.128  | 1.00 | 0.00 |
| C    |      |     |     |     |                |        |      |      |
| ATOM | 5537 | CD  | LYS | 103 | -3.391-107.782 | 4.630  | 1.00 | 0.00 |
| C    |      |     |     |     |                |        |      |      |
| ATOM | 5538 | CE  | LYS | 103 | -4.861-107.613 | 4.089  | 1.00 | 0.00 |
| C    |      |     |     |     |                |        |      |      |
| ATOM | 5539 | NZ  | LYS | 103 | -5.698-108.656 | 4.624  | 1.00 | 0.00 |
| N1+  |      |     |     |     |                |        |      |      |
| ATOM | 5540 | C   | LYS | 103 | -4.498-106.479 | 8.785  | 1.00 | 0.00 |
| C    |      |     |     |     |                |        |      |      |
| ATOM | 5541 | O   | LYS | 103 | -5.668-106.329 | 8.966  | 1.00 | 0.00 |
| O    |      |     |     |     |                |        |      |      |
| ATOM | 5542 | N   | SER | 104 | -3.801-107.545 | 9.246  | 1.00 | 0.00 |
| N    |      |     |     |     |                |        |      |      |
| ATOM | 5543 | CA  | SER | 104 | -4.377-108.641 | 10.063 | 1.00 | 0.00 |
| C    |      |     |     |     |                |        |      |      |
| ATOM | 5544 | CB  | SER | 104 | -3.633-110.003 | 9.729  | 1.00 | 0.00 |
| C    |      |     |     |     |                |        |      |      |
| ATOM | 5545 | OG  | SER | 104 | -4.172-111.206 | 10.201 | 1.00 | 0.00 |
| O    |      |     |     |     |                |        |      |      |
| ATOM | 5546 | C   | SER | 104 | -4.357-108.331 | 11.523 | 1.00 | 0.00 |
| C    |      |     |     |     |                |        |      |      |
| ATOM | 5547 | O   | SER | 104 | -4.296-107.188 | 11.928 | 1.00 | 0.00 |
| O    |      |     |     |     |                |        |      |      |
| ATOM | 5548 | N   | ILE | 105 | -4.451-109.340 | 12.447 | 1.00 | 0.00 |
| N    |      |     |     |     |                |        |      |      |
| ATOM | 5549 | CA  | ILE | 105 | -4.142-109.268 | 13.904 | 1.00 | 0.00 |
| C    |      |     |     |     |                |        |      |      |
| ATOM | 5550 | CB  | ILE | 105 | -5.297-108.614 | 14.714 | 1.00 | 0.00 |
| C    |      |     |     |     |                |        |      |      |
| ATOM | 5551 | CG2 | ILE | 105 | -6.659-109.187 | 14.387 | 1.00 | 0.00 |
| C    |      |     |     |     |                |        |      |      |
| ATOM | 5552 | CG1 | ILE | 105 | -4.831-108.439 | 16.155 | 1.00 | 0.00 |
| C    |      |     |     |     |                |        |      |      |

|      |      |     |     |     |                |        |      |      |
|------|------|-----|-----|-----|----------------|--------|------|------|
| ATOM | 5553 | CD1 | ILE | 105 | -5.741-107.464 | 16.941 | 1.00 | 0.00 |
| C    |      |     |     |     |                |        |      |      |
| ATOM | 5554 | C   | ILE | 105 | -3.704-110.547 | 14.503 | 1.00 | 0.00 |
| C    |      |     |     |     |                |        |      |      |
| ATOM | 5555 | O   | ILE | 105 | -4.400-111.552 | 14.220 | 1.00 | 0.00 |
| O    |      |     |     |     |                |        |      |      |
| ATOM | 5556 | N   | ILE | 106 | -2.567-110.605 | 15.187 | 1.00 | 0.00 |
| N    |      |     |     |     |                |        |      |      |
| ATOM | 5557 | CA  | ILE | 106 | -2.036-111.872 | 15.773 | 1.00 | 0.00 |
| C    |      |     |     |     |                |        |      |      |
| ATOM | 5558 | CB  | ILE | 106 | -0.522-111.767 | 16.080 | 1.00 | 0.00 |
| C    |      |     |     |     |                |        |      |      |
| ATOM | 5559 | CG2 | ILE | 106 | -0.034-112.970 | 16.950 | 1.00 | 0.00 |
| C    |      |     |     |     |                |        |      |      |
| ATOM | 5560 | CG1 | ILE | 106 | 0.266-111.864  | 14.736 | 1.00 | 0.00 |
| C    |      |     |     |     |                |        |      |      |
| ATOM | 5561 | CD1 | ILE | 106 | 1.633-111.202  | 14.754 | 1.00 | 0.00 |
| C    |      |     |     |     |                |        |      |      |
| ATOM | 5562 | C   | ILE | 106 | -2.900-112.226 | 16.968 | 1.00 | 0.00 |
| C    |      |     |     |     |                |        |      |      |
| ATOM | 5563 | O   | ILE | 106 | -3.483-111.393 | 17.650 | 1.00 | 0.00 |
| O    |      |     |     |     |                |        |      |      |
| ATOM | 5564 | N   | CYS | 107 | -2.959-113.578 | 17.244 | 1.00 | 0.00 |
| N    |      |     |     |     |                |        |      |      |
| ATOM | 5565 | CA  | CYS | 107 | -3.673-114.300 | 18.271 | 1.00 | 0.00 |
| C    |      |     |     |     |                |        |      |      |
| ATOM | 5566 | CB  | CYS | 107 | -5.159-114.322 | 17.939 | 1.00 | 0.00 |
| C    |      |     |     |     |                |        |      |      |
| ATOM | 5567 | SG  | CYS | 107 | -5.519-115.329 | 16.484 | 1.00 | 0.00 |
| S    |      |     |     |     |                |        |      |      |
| ATOM | 5568 | C   | CYS | 107 | -2.967-115.617 | 18.594 | 1.00 | 0.00 |
| C    |      |     |     |     |                |        |      |      |
| ATOM | 5569 | O   | CYS | 107 | -1.964-115.905 | 17.967 | 1.00 | 0.00 |
| O    |      |     |     |     |                |        |      |      |
| ATOM | 5570 | N   | PRO | 108 | -3.477-116.572 | 19.404 | 1.00 | 0.00 |
| N    |      |     |     |     |                |        |      |      |
| ATOM | 5571 | CD  | PRO | 108 | -4.430-116.257 | 20.519 | 1.00 | 0.00 |
| C    |      |     |     |     |                |        |      |      |
| ATOM | 5572 | CG  | PRO | 108 | -3.903-117.054 | 21.703 | 1.00 | 0.00 |
| C    |      |     |     |     |                |        |      |      |
| ATOM | 5573 | CB  | PRO | 108 | -3.456-118.330 | 21.059 | 1.00 | 0.00 |
| C    |      |     |     |     |                |        |      |      |
| ATOM | 5574 | CA  | PRO | 108 | -2.889-117.855 | 19.678 | 1.00 | 0.00 |
| C    |      |     |     |     |                |        |      |      |
| ATOM | 5575 | C   | PRO | 108 | -3.119-118.959 | 18.636 | 1.00 | 0.00 |
| C    |      |     |     |     |                |        |      |      |
| ATOM | 5576 | O   | PRO | 108 | -4.279-119.136 | 18.212 | 1.00 | 0.00 |
| O    |      |     |     |     |                |        |      |      |
| ATOM | 5577 | N   | GLY | 109 | -2.100-119.735 | 18.269 | 1.00 | 0.00 |
| N    |      |     |     |     |                |        |      |      |
| ATOM | 5578 | CA  | GLY | 109 | -2.179-120.646 | 17.132 | 1.00 | 0.00 |
| C    |      |     |     |     |                |        |      |      |
| ATOM | 5579 | C   | GLY | 109 | -2.102-120.067 | 15.783 | 1.00 | 0.00 |
| C    |      |     |     |     |                |        |      |      |

|      |      |     |     |     |                |        |      |      |
|------|------|-----|-----|-----|----------------|--------|------|------|
| ATOM | 5580 | O   | GLY | 109 | -2.463-120.716 | 14.807 | 1.00 | 0.00 |
| O    |      |     |     |     |                |        |      |      |
| ATOM | 5581 | N   | TYR | 110 | -1.678-118.853 | 15.586 | 1.00 | 0.00 |
| N    |      |     |     |     |                |        |      |      |
| ATOM | 5582 | CA  | TYR | 110 | -1.807-118.244 | 14.245 | 1.00 | 0.00 |
| C    |      |     |     |     |                |        |      |      |
| ATOM | 5583 | CB  | TYR | 110 | -1.836-116.738 | 14.511 | 1.00 | 0.00 |
| C    |      |     |     |     |                |        |      |      |
| ATOM | 5584 | CG  | TYR | 110 | -2.018-115.861 | 13.305 | 1.00 | 0.00 |
| C    |      |     |     |     |                |        |      |      |
| ATOM | 5585 | CD1 | TYR | 110 | -1.032-115.767 | 12.324 | 1.00 | 0.00 |
| C    |      |     |     |     |                |        |      |      |
| ATOM | 5586 | CE1 | TYR | 110 | -1.215-114.978 | 11.138 | 1.00 | 0.00 |
| C    |      |     |     |     |                |        |      |      |
| ATOM | 5587 | CZ  | TYR | 110 | -2.279-114.075 | 11.152 | 1.00 | 0.00 |
| C    |      |     |     |     |                |        |      |      |
| ATOM | 5588 | OH  | TYR | 110 | -2.536-113.365 | 10.012 | 1.00 | 0.00 |
| O    |      |     |     |     |                |        |      |      |
| ATOM | 5589 | CE2 | TYR | 110 | -3.267-114.098 | 12.176 | 1.00 | 0.00 |
| C    |      |     |     |     |                |        |      |      |
| ATOM | 5590 | CD2 | TYR | 110 | -3.139-115.026 | 13.189 | 1.00 | 0.00 |
| C    |      |     |     |     |                |        |      |      |
| ATOM | 5591 | C   | TYR | 110 | -0.839-118.761 | 13.201 | 1.00 | 0.00 |
| C    |      |     |     |     |                |        |      |      |
| ATOM | 5592 | O   | TYR | 110 | 0.300-118.878  | 13.519 | 1.00 | 0.00 |
| O    |      |     |     |     |                |        |      |      |
| ATOM | 5593 | N   | ASN | 111 | -1.248-119.162 | 11.986 | 1.00 | 0.00 |
| N    |      |     |     |     |                |        |      |      |
| ATOM | 5594 | CA  | ASN | 111 | -0.424-119.522 | 10.871 | 1.00 | 0.00 |
| C    |      |     |     |     |                |        |      |      |
| ATOM | 5595 | CB  | ASN | 111 | -1.139-120.587 | 10.050 | 1.00 | 0.00 |
| C    |      |     |     |     |                |        |      |      |
| ATOM | 5596 | CG  | ASN | 111 | -0.246-121.378 | 9.125  | 1.00 | 0.00 |
| C    |      |     |     |     |                |        |      |      |
| ATOM | 5597 | OD1 | ASN | 111 | 0.179-120.871  | 8.079  | 1.00 | 0.00 |
| O    |      |     |     |     |                |        |      |      |
| ATOM | 5598 | ND2 | ASN | 111 | 0.056-122.710  | 9.383  | 1.00 | 0.00 |
| N    |      |     |     |     |                |        |      |      |
| ATOM | 5599 | C   | ASN | 111 | 0.202-118.437  | 9.928  | 1.00 | 0.00 |
| C    |      |     |     |     |                |        |      |      |
| ATOM | 5600 | O   | ASN | 111 | -0.532-117.709 | 9.244  | 1.00 | 0.00 |
| O    |      |     |     |     |                |        |      |      |
| ATOM | 5601 | N   | ALA | 112 | 1.539-118.412  | 9.816  | 1.00 | 0.00 |
| N    |      |     |     |     |                |        |      |      |
| ATOM | 5602 | CA  | ALA | 112 | 2.274-117.441  | 9.044  | 1.00 | 0.00 |
| C    |      |     |     |     |                |        |      |      |
| ATOM | 5603 | CB  | ALA | 112 | 2.698-116.331  | 10.100 | 1.00 | 0.00 |
| C    |      |     |     |     |                |        |      |      |
| ATOM | 5604 | C   | ALA | 112 | 3.541-118.038  | 8.446  | 1.00 | 0.00 |
| C    |      |     |     |     |                |        |      |      |
| ATOM | 5605 | O   | ALA | 112 | 3.757-119.245  | 8.465  | 1.00 | 0.00 |
| O    |      |     |     |     |                |        |      |      |
| ATOM | 5606 | N   | VAL | 113 | 4.332-117.209  | 7.819  | 1.00 | 0.00 |
| N    |      |     |     |     |                |        |      |      |

|      |      |     |     |     |                |        |      |      |
|------|------|-----|-----|-----|----------------|--------|------|------|
| ATOM | 5607 | CA  | VAL | 113 | 5.674-117.452  | 7.243  | 1.00 | 0.00 |
| C    |      |     |     |     |                |        |      |      |
| ATOM | 5608 | CB  | VAL | 113 | 5.826-116.571  | 5.971  | 1.00 | 0.00 |
| C    |      |     |     |     |                |        |      |      |
| ATOM | 5609 | CG1 | VAL | 113 | 7.066-116.819  | 5.130  | 1.00 | 0.00 |
| C    |      |     |     |     |                |        |      |      |
| ATOM | 5610 | CG2 | VAL | 113 | 4.614-116.571  | 5.047  | 1.00 | 0.00 |
| C    |      |     |     |     |                |        |      |      |
| ATOM | 5611 | C   | VAL | 113 | 6.753-117.014  | 8.274  | 1.00 | 0.00 |
| C    |      |     |     |     |                |        |      |      |
| ATOM | 5612 | O   | VAL | 113 | 6.768-115.856  | 8.667  | 1.00 | 0.00 |
| O    |      |     |     |     |                |        |      |      |
| ATOM | 5613 | N   | LEU | 114 | 7.607-117.919  | 8.678  | 1.00 | 0.00 |
| N    |      |     |     |     |                |        |      |      |
| ATOM | 5614 | CA  | LEU | 114 | 8.887-117.671  | 9.339  | 1.00 | 0.00 |
| C    |      |     |     |     |                |        |      |      |
| ATOM | 5615 | CB  | LEU | 114 | 9.328-119.020  | 10.017 | 1.00 | 0.00 |
| C    |      |     |     |     |                |        |      |      |
| ATOM | 5616 | CG  | LEU | 114 | 10.644-119.012 | 10.892 | 1.00 | 0.00 |
| C    |      |     |     |     |                |        |      |      |
| ATOM | 5617 | CD1 | LEU | 114 | 10.421-118.128 | 12.072 | 1.00 | 0.00 |
| C    |      |     |     |     |                |        |      |      |
| ATOM | 5618 | CD2 | LEU | 114 | 11.070-120.399 | 11.384 | 1.00 | 0.00 |
| C    |      |     |     |     |                |        |      |      |
| ATOM | 5619 | C   | LEU | 114 | 9.943-117.266  | 8.347  | 1.00 | 0.00 |
| C    |      |     |     |     |                |        |      |      |
| ATOM | 5620 | O   | LEU | 114 | 10.023-117.821 | 7.238  | 1.00 | 0.00 |
| O    |      |     |     |     |                |        |      |      |
| ATOM | 5621 | N   | HIE | 115 | 10.819-116.343 | 8.682  | 1.00 | 0.00 |
| N    |      |     |     |     |                |        |      |      |
| ATOM | 5622 | CA  | HIE | 115 | 12.114-116.037 | 8.001  | 1.00 | 0.00 |
| C    |      |     |     |     |                |        |      |      |
| ATOM | 5623 | CB  | HIE | 115 | 11.918-114.801 | 7.086  | 1.00 | 0.00 |
| C    |      |     |     |     |                |        |      |      |
| ATOM | 5624 | CG  | HIE | 115 | 13.060-114.614 | 6.079  | 1.00 | 0.00 |
| C    |      |     |     |     |                |        |      |      |
| ATOM | 5625 | ND1 | HIE | 115 | 12.739-114.330 | 4.711  | 1.00 | 0.00 |
| N    |      |     |     |     |                |        |      |      |
| ATOM | 5626 | CE1 | HIE | 115 | 13.879-114.162 | 4.072  | 1.00 | 0.00 |
| C    |      |     |     |     |                |        |      |      |
| ATOM | 5627 | NE2 | HIE | 115 | 14.890-114.470 | 4.864  | 1.00 | 0.00 |
| N    |      |     |     |     |                |        |      |      |
| ATOM | 5628 | CD2 | HIE | 115 | 14.429-114.709 | 6.149  | 1.00 | 0.00 |
| C    |      |     |     |     |                |        |      |      |
| ATOM | 5629 | C   | HIE | 115 | 13.182-115.929 | 9.077  | 1.00 | 0.00 |
| C    |      |     |     |     |                |        |      |      |
| ATOM | 5630 | O   | HIE | 115 | 13.353-114.863 | 9.658  | 1.00 | 0.00 |
| O    |      |     |     |     |                |        |      |      |
| ATOM | 5631 | N   | ILE | 116 | 13.895-117.025 | 9.356  | 1.00 | 0.00 |
| N    |      |     |     |     |                |        |      |      |
| ATOM | 5632 | CA  | ILE | 116 | 14.942-117.145 | 10.413 | 1.00 | 0.00 |
| C    |      |     |     |     |                |        |      |      |
| ATOM | 5633 | CB  | ILE | 116 | 14.710-118.359 | 11.241 | 1.00 | 0.00 |
| C    |      |     |     |     |                |        |      |      |

|      |      |     |     |     |                |        |      |      |
|------|------|-----|-----|-----|----------------|--------|------|------|
| ATOM | 5634 | CG2 | ILE | 116 | 14.751-119.701 | 10.599 | 1.00 | 0.00 |
| C    |      |     |     |     |                |        |      |      |
| ATOM | 5635 | CG1 | ILE | 116 | 15.652-118.417 | 12.472 | 1.00 | 0.00 |
| C    |      |     |     |     |                |        |      |      |
| ATOM | 5636 | CD1 | ILE | 116 | 14.921-118.863 | 13.802 | 1.00 | 0.00 |
| C    |      |     |     |     |                |        |      |      |
| ATOM | 5637 | C   | ILE | 116 | 16.262-117.185 | 9.666  | 1.00 | 0.00 |
| C    |      |     |     |     |                |        |      |      |
| ATOM | 5638 | O   | ILE | 116 | 16.368-118.105 | 8.808  | 1.00 | 0.00 |
| O    |      |     |     |     |                |        |      |      |
| ATOM | 5639 | N   | HIE | 117 | 17.227-116.364 | 10.021 | 1.00 | 0.00 |
| N    |      |     |     |     |                |        |      |      |
| ATOM | 5640 | CA  | HIE | 117 | 18.568-116.355 | 9.364  | 1.00 | 0.00 |
| C    |      |     |     |     |                |        |      |      |
| ATOM | 5641 | CB  | HIE | 117 | 19.543-117.407 | 9.966  | 1.00 | 0.00 |
| C    |      |     |     |     |                |        |      |      |
| ATOM | 5642 | CG  | HIE | 117 | 19.153-118.887 | 10.054 | 1.00 | 0.00 |
| C    |      |     |     |     |                |        |      |      |
| ATOM | 5643 | ND1 | HIE | 117 | 19.095-119.785 | 8.982  | 1.00 | 0.00 |
| N    |      |     |     |     |                |        |      |      |
| ATOM | 5644 | CE1 | HIE | 117 | 18.830-120.981 | 9.532  | 1.00 | 0.00 |
| C    |      |     |     |     |                |        |      |      |
| ATOM | 5645 | NE2 | HIE | 117 | 18.662-120.903 | 10.849 | 1.00 | 0.00 |
| N    |      |     |     |     |                |        |      |      |
| ATOM | 5646 | CD2 | HIE | 117 | 18.994-119.651 | 11.264 | 1.00 | 0.00 |
| C    |      |     |     |     |                |        |      |      |
| ATOM | 5647 | C   | HIE | 117 | 18.423-116.233 | 7.896  | 1.00 | 0.00 |
| C    |      |     |     |     |                |        |      |      |
| ATOM | 5648 | O   | HIE | 117 | 17.974-115.189 | 7.422  | 1.00 | 0.00 |
| O    |      |     |     |     |                |        |      |      |
| ATOM | 5649 | N   | THR | 118 | 18.700-117.347 | 7.129  | 1.00 | 0.00 |
| N    |      |     |     |     |                |        |      |      |
| ATOM | 5650 | CA  | THR | 118 | 18.249-117.569 | 5.697  | 1.00 | 0.00 |
| C    |      |     |     |     |                |        |      |      |
| ATOM | 5651 | CB  | THR | 118 | 19.478-117.821 | 4.821  | 1.00 | 0.00 |
| C    |      |     |     |     |                |        |      |      |
| ATOM | 5652 | CG2 | THR | 118 | 20.623-116.801 | 5.093  | 1.00 | 0.00 |
| C    |      |     |     |     |                |        |      |      |
| ATOM | 5653 | OG1 | THR | 118 | 19.969-119.143 | 5.155  | 1.00 | 0.00 |
| O    |      |     |     |     |                |        |      |      |
| ATOM | 5654 | C   | THR | 118 | 17.116-118.567 | 5.318  | 1.00 | 0.00 |
| C    |      |     |     |     |                |        |      |      |
| ATOM | 5655 | O   | THR | 118 | 16.710-118.625 | 4.156  | 1.00 | 0.00 |
| O    |      |     |     |     |                |        |      |      |
| ATOM | 5656 | N   | CYS | 119 | 16.626-119.272 | 6.326  | 1.00 | 0.00 |
| N    |      |     |     |     |                |        |      |      |
| ATOM | 5657 | CA  | CYS | 119 | 15.569-120.280 | 6.157  | 1.00 | 0.00 |
| C    |      |     |     |     |                |        |      |      |
| ATOM | 5658 | CB  | CYS | 119 | 15.803-121.220 | 7.325  | 1.00 | 0.00 |
| C    |      |     |     |     |                |        |      |      |
| ATOM | 5659 | SG  | CYS | 119 | 14.504-122.408 | 7.616  | 1.00 | 0.00 |
| S    |      |     |     |     |                |        |      |      |
| ATOM | 5660 | C   | CYS | 119 | 14.186-119.608 | 6.015  | 1.00 | 0.00 |
| C    |      |     |     |     |                |        |      |      |

|      |      |     |     |     |                |       |      |      |
|------|------|-----|-----|-----|----------------|-------|------|------|
| ATOM | 5661 | O   | CYS | 119 | 13.975-118.648 | 6.734 | 1.00 | 0.00 |
| O    |      |     |     |     |                |       |      |      |
| ATOM | 5662 | N   | ILE | 120 | 13.314-120.145 | 5.159 | 1.00 | 0.00 |
| N    |      |     |     |     |                |       |      |      |
| ATOM | 5663 | CA  | ILE | 120 | 11.892-119.909 | 5.182 | 1.00 | 0.00 |
| C    |      |     |     |     |                |       |      |      |
| ATOM | 5664 | CB  | ILE | 120 | 11.379-119.080 | 3.915 | 1.00 | 0.00 |
| C    |      |     |     |     |                |       |      |      |
| ATOM | 5665 | CG2 | ILE | 120 | 9.832-118.886  | 3.887 | 1.00 | 0.00 |
| C    |      |     |     |     |                |       |      |      |
| ATOM | 5666 | CG1 | ILE | 120 | 12.222-117.908 | 3.549 | 1.00 | 0.00 |
| C    |      |     |     |     |                |       |      |      |
| ATOM | 5667 | CD1 | ILE | 120 | 12.011-117.199 | 2.199 | 1.00 | 0.00 |
| C    |      |     |     |     |                |       |      |      |
| ATOM | 5668 | C   | ILE | 120 | 11.091-121.260 | 5.505 | 1.00 | 0.00 |
| C    |      |     |     |     |                |       |      |      |
| ATOM | 5669 | O   | ILE | 120 | 11.286-122.268 | 4.824 | 1.00 | 0.00 |
| O    |      |     |     |     |                |       |      |      |
| ATOM | 5670 | N   | GLU | 121 | 10.076-121.132 | 6.346 | 1.00 | 0.00 |
| N    |      |     |     |     |                |       |      |      |
| ATOM | 5671 | CA  | GLU | 121 | 9.053-122.147  | 6.643 | 1.00 | 0.00 |
| C    |      |     |     |     |                |       |      |      |
| ATOM | 5672 | CB  | GLU | 121 | 9.754-123.117  | 7.557 | 1.00 | 0.00 |
| C    |      |     |     |     |                |       |      |      |
| ATOM | 5673 | CG  | GLU | 121 | 9.032-124.446  | 7.975 | 1.00 | 0.00 |
| C    |      |     |     |     |                |       |      |      |
| ATOM | 5674 | CD  | GLU | 121 | 8.719-125.302  | 6.763 | 1.00 | 0.00 |
| C    |      |     |     |     |                |       |      |      |
| ATOM | 5675 | OE1 | GLU | 121 | 7.766-124.942  | 6.022 | 1.00 | 0.00 |
| O    |      |     |     |     |                |       |      |      |
| ATOM | 5676 | OE2 | GLU | 121 | 9.210-126.462  | 6.603 | 1.00 | 0.00 |
| O1-  |      |     |     |     |                |       |      |      |
| ATOM | 5677 | C   | GLU | 121 | 7.677-121.629  | 7.250 | 1.00 | 0.00 |
| C    |      |     |     |     |                |       |      |      |
| ATOM | 5678 | O   | GLU | 121 | 7.519-120.457  | 7.648 | 1.00 | 0.00 |
| O    |      |     |     |     |                |       |      |      |
| ATOM | 5679 | N   | GLU | 122 | 6.647-122.486  | 7.091 | 1.00 | 0.00 |
| N    |      |     |     |     |                |       |      |      |
| ATOM | 5680 | CA  | GLU | 122 | 5.325-122.263  | 7.674 | 1.00 | 0.00 |
| C    |      |     |     |     |                |       |      |      |
| ATOM | 5681 | CB  | GLU | 122 | 4.323-123.014  | 6.858 | 1.00 | 0.00 |
| C    |      |     |     |     |                |       |      |      |
| ATOM | 5682 | CG  | GLU | 122 | 2.920-123.007  | 7.471 | 1.00 | 0.00 |
| C    |      |     |     |     |                |       |      |      |
| ATOM | 5683 | CD  | GLU | 122 | 2.003-124.042  | 6.739 | 1.00 | 0.00 |
| C    |      |     |     |     |                |       |      |      |
| ATOM | 5684 | OE1 | GLU | 122 | 1.142-124.537  | 7.492 | 1.00 | 0.00 |
| O    |      |     |     |     |                |       |      |      |
| ATOM | 5685 | OE2 | GLU | 122 | 2.120-124.393  | 5.542 | 1.00 | 0.00 |
| O1-  |      |     |     |     |                |       |      |      |
| ATOM | 5686 | C   | GLU | 122 | 5.402-122.533  | 9.186 | 1.00 | 0.00 |
| C    |      |     |     |     |                |       |      |      |
| ATOM | 5687 | O   | GLU | 122 | 5.765-123.643  | 9.614 | 1.00 | 0.00 |
| O    |      |     |     |     |                |       |      |      |

|      |      |     |     |     |                |        |      |      |
|------|------|-----|-----|-----|----------------|--------|------|------|
| ATOM | 5688 | N   | VAL | 123 | 4.986-121.546  | 10.027 | 1.00 | 0.00 |
| N    |      |     |     |     |                |        |      |      |
| ATOM | 5689 | CA  | VAL | 123 | 5.019-121.592  | 11.451 | 1.00 | 0.00 |
| C    |      |     |     |     |                |        |      |      |
| ATOM | 5690 | CB  | VAL | 123 | 6.139-120.738  | 12.075 | 1.00 | 0.00 |
| C    |      |     |     |     |                |        |      |      |
| ATOM | 5691 | CG1 | VAL | 123 | 5.833-119.242  | 12.103 | 1.00 | 0.00 |
| C    |      |     |     |     |                |        |      |      |
| ATOM | 5692 | CG2 | VAL | 123 | 6.496-121.204  | 13.515 | 1.00 | 0.00 |
| C    |      |     |     |     |                |        |      |      |
| ATOM | 5693 | C   | VAL | 123 | 3.605-121.269  | 12.045 | 1.00 | 0.00 |
| C    |      |     |     |     |                |        |      |      |
| ATOM | 5694 | O   | VAL | 123 | 2.926-120.373  | 11.531 | 1.00 | 0.00 |
| O    |      |     |     |     |                |        |      |      |
| ATOM | 5695 | N   | GLU | 124 | 3.278-122.054  | 13.001 | 1.00 | 0.00 |
| N    |      |     |     |     |                |        |      |      |
| ATOM | 5696 | CA  | GLU | 124 | 2.176-121.833  | 13.899 | 1.00 | 0.00 |
| C    |      |     |     |     |                |        |      |      |
| ATOM | 5697 | CB  | GLU | 124 | 1.487-123.164  | 14.282 | 1.00 | 0.00 |
| C    |      |     |     |     |                |        |      |      |
| ATOM | 5698 | CG  | GLU | 124 | 0.288-123.012  | 15.229 | 1.00 | 0.00 |
| C    |      |     |     |     |                |        |      |      |
| ATOM | 5699 | CD  | GLU | 124 | -0.026-124.324 | 15.910 | 1.00 | 0.00 |
| C    |      |     |     |     |                |        |      |      |
| ATOM | 5700 | OE1 | GLU | 124 | -0.523-124.310 | 17.076 | 1.00 | 0.00 |
| O    |      |     |     |     |                |        |      |      |
| ATOM | 5701 | OE2 | GLU | 124 | 0.202-125.448  | 15.347 | 1.00 | 0.00 |
| O1-  |      |     |     |     |                |        |      |      |
| ATOM | 5702 | C   | GLU | 124 | 2.799-121.064  | 15.105 | 1.00 | 0.00 |
| C    |      |     |     |     |                |        |      |      |
| ATOM | 5703 | O   | GLU | 124 | 3.751-121.508  | 15.790 | 1.00 | 0.00 |
| O    |      |     |     |     |                |        |      |      |
| ATOM | 5704 | N   | ILE | 125 | 2.207-119.916  | 15.372 | 1.00 | 0.00 |
| N    |      |     |     |     |                |        |      |      |
| ATOM | 5705 | CA  | ILE | 125 | 2.396-119.120  | 16.544 | 1.00 | 0.00 |
| C    |      |     |     |     |                |        |      |      |
| ATOM | 5706 | CB  | ILE | 125 | 2.061-117.633  | 16.232 | 1.00 | 0.00 |
| C    |      |     |     |     |                |        |      |      |
| ATOM | 5707 | CG2 | ILE | 125 | 2.412-116.769  | 17.448 | 1.00 | 0.00 |
| C    |      |     |     |     |                |        |      |      |
| ATOM | 5708 | CG1 | ILE | 125 | 2.916-117.070  | 15.108 | 1.00 | 0.00 |
| C    |      |     |     |     |                |        |      |      |
| ATOM | 5709 | CD1 | ILE | 125 | 2.223-115.975  | 14.259 | 1.00 | 0.00 |
| C    |      |     |     |     |                |        |      |      |
| ATOM | 5710 | C   | ILE | 125 | 1.678-119.734  | 17.663 | 1.00 | 0.00 |
| C    |      |     |     |     |                |        |      |      |
| ATOM | 5711 | O   | ILE | 125 | 0.620-119.190  | 18.136 | 1.00 | 0.00 |
| O    |      |     |     |     |                |        |      |      |
| ATOM | 5712 | N   | THR | 126 | 2.106-120.915  | 18.148 | 1.00 | 0.00 |
| N    |      |     |     |     |                |        |      |      |
| ATOM | 5713 | CA  | THR | 126 | 1.267-121.877  | 18.863 | 1.00 | 0.00 |
| C    |      |     |     |     |                |        |      |      |
| ATOM | 5714 | CB  | THR | 126 | 2.016-123.257  | 18.794 | 1.00 | 0.00 |
| C    |      |     |     |     |                |        |      |      |

|      |      |     |     |     |                |        |      |      |
|------|------|-----|-----|-----|----------------|--------|------|------|
| ATOM | 5715 | CG2 | THR | 126 | 3.389-123.366  | 19.380 | 1.00 | 0.00 |
| C    |      |     |     |     |                |        |      |      |
| ATOM | 5716 | OG1 | THR | 126 | 1.301-124.291  | 19.273 | 1.00 | 0.00 |
| O    |      |     |     |     |                |        |      |      |
| ATOM | 5717 | C   | THR | 126 | 0.786-121.509  | 20.192 | 1.00 | 0.00 |
| C    |      |     |     |     |                |        |      |      |
| ATOM | 5718 | O   | THR | 126 | -0.211-122.143 | 20.683 | 1.00 | 0.00 |
| O    |      |     |     |     |                |        |      |      |
| ATOM | 5719 | N   | ALA | 127 | 1.346-120.510  | 20.917 | 1.00 | 0.00 |
| N    |      |     |     |     |                |        |      |      |
| ATOM | 5720 | CA  | ALA | 127 | 0.981-119.972  | 22.227 | 1.00 | 0.00 |
| C    |      |     |     |     |                |        |      |      |
| ATOM | 5721 | CB  | ALA | 127 | 1.492-120.873  | 23.369 | 1.00 | 0.00 |
| C    |      |     |     |     |                |        |      |      |
| ATOM | 5722 | C   | ALA | 127 | 1.468-118.517  | 22.354 | 1.00 | 0.00 |
| C    |      |     |     |     |                |        |      |      |
| ATOM | 5723 | O   | ALA | 127 | 2.487-118.126  | 21.779 | 1.00 | 0.00 |
| O    |      |     |     |     |                |        |      |      |
| ATOM | 5724 | N   | LEU | 128 | 0.632-117.641  | 22.935 | 1.00 | 0.00 |
| N    |      |     |     |     |                |        |      |      |
| ATOM | 5725 | CA  | LEU | 128 | 1.195-116.364  | 23.430 | 1.00 | 0.00 |
| C    |      |     |     |     |                |        |      |      |
| ATOM | 5726 | CB  | LEU | 128 | 0.394-115.133  | 22.931 | 1.00 | 0.00 |
| C    |      |     |     |     |                |        |      |      |
| ATOM | 5727 | CG  | LEU | 128 | 0.141-114.994  | 21.482 | 1.00 | 0.00 |
| C    |      |     |     |     |                |        |      |      |
| ATOM | 5728 | CD1 | LEU | 128 | -0.819-113.878 | 21.094 | 1.00 | 0.00 |
| C    |      |     |     |     |                |        |      |      |
| ATOM | 5729 | CD2 | LEU | 128 | 1.402-115.098  | 20.563 | 1.00 | 0.00 |
| C    |      |     |     |     |                |        |      |      |
| ATOM | 5730 | C   | LEU | 128 | 1.080-116.478  | 24.992 | 1.00 | 0.00 |
| C    |      |     |     |     |                |        |      |      |
| ATOM | 5731 | O   | LEU | 128 | -0.032-116.551 | 25.537 | 1.00 | 0.00 |
| O    |      |     |     |     |                |        |      |      |
| ATOM | 5732 | N   | ILE | 129 | 2.146-116.385  | 25.791 | 1.00 | 0.00 |
| N    |      |     |     |     |                |        |      |      |
| ATOM | 5733 | CA  | ILE | 129 | 2.026-116.616  | 27.303 | 1.00 | 0.00 |
| C    |      |     |     |     |                |        |      |      |
| ATOM | 5734 | CB  | ILE | 129 | 3.325-117.386  | 27.897 | 1.00 | 0.00 |
| C    |      |     |     |     |                |        |      |      |
| ATOM | 5735 | CG2 | ILE | 129 | 3.274-117.526  | 29.475 | 1.00 | 0.00 |
| C    |      |     |     |     |                |        |      |      |
| ATOM | 5736 | CG1 | ILE | 129 | 3.747-118.629  | 27.146 | 1.00 | 0.00 |
| C    |      |     |     |     |                |        |      |      |
| ATOM | 5737 | CD1 | ILE | 129 | 2.600-119.693  | 27.326 | 1.00 | 0.00 |
| C    |      |     |     |     |                |        |      |      |
| ATOM | 5738 | C   | ILE | 129 | 1.652-115.324  | 28.027 | 1.00 | 0.00 |
| C    |      |     |     |     |                |        |      |      |
| ATOM | 5739 | O   | ILE | 129 | 0.964-115.473  | 29.075 | 1.00 | 0.00 |
| O    |      |     |     |     |                |        |      |      |
| ATOM | 5740 | N   | CYS | 130 | 2.152-114.162  | 27.599 | 1.00 | 0.00 |
| N    |      |     |     |     |                |        |      |      |
| ATOM | 5741 | CA  | CYS | 130 | 1.979-112.918  | 28.296 | 1.00 | 0.00 |
| C    |      |     |     |     |                |        |      |      |



|      |      |     |     |     |                |        |      |      |
|------|------|-----|-----|-----|----------------|--------|------|------|
| ATOM | 5742 | CB  | CYS | 130 | 2.703-112.887  | 29.688 | 1.00 | 0.00 |
| C    |      |     |     |     |                |        |      |      |
| ATOM | 5743 | SG  | CYS | 130 | 4.519-112.776  | 29.409 | 1.00 | 0.00 |
| S    |      |     |     |     |                |        |      |      |
| ATOM | 5744 | C   | CYS | 130 | 2.412-111.650  | 27.470 | 1.00 | 0.00 |
| C    |      |     |     |     |                |        |      |      |
| ATOM | 5745 | O   | CYS | 130 | 3.463-111.540  | 26.856 | 1.00 | 0.00 |
| O    |      |     |     |     |                |        |      |      |
| ATOM | 5746 | N   | LEU | 131 | 1.540-110.600  | 27.537 | 1.00 | 0.00 |
| N    |      |     |     |     |                |        |      |      |
| ATOM | 5747 | CA  | LEU | 131 | 1.877-109.162  | 27.127 | 1.00 | 0.00 |
| C    |      |     |     |     |                |        |      |      |
| ATOM | 5748 | CB  | LEU | 131 | 0.592-108.347  | 26.877 | 1.00 | 0.00 |
| C    |      |     |     |     |                |        |      |      |
| ATOM | 5749 | CG  | LEU | 131 | 0.255-108.203  | 25.415 | 1.00 | 0.00 |
| C    |      |     |     |     |                |        |      |      |
| ATOM | 5750 | CD1 | LEU | 131 | -1.154-107.638 | 25.084 | 1.00 | 0.00 |
| C    |      |     |     |     |                |        |      |      |
| ATOM | 5751 | CD2 | LEU | 131 | 1.281-107.224  | 24.785 | 1.00 | 0.00 |
| C    |      |     |     |     |                |        |      |      |
| ATOM | 5752 | C   | LEU | 131 | 2.798-108.679  | 28.197 | 1.00 | 0.00 |
| C    |      |     |     |     |                |        |      |      |
| ATOM | 5753 | O   | LEU | 131 | 2.693-109.061  | 29.340 | 1.00 | 0.00 |
| O    |      |     |     |     |                |        |      |      |
| ATOM | 5754 | N   | VAL | 132 | 3.713-107.809  | 27.789 | 1.00 | 0.00 |
| N    |      |     |     |     |                |        |      |      |
| ATOM | 5755 | CA  | VAL | 132 | 4.679-106.979  | 28.591 | 1.00 | 0.00 |
| C    |      |     |     |     |                |        |      |      |
| ATOM | 5756 | CB  | VAL | 132 | 6.067-107.454  | 28.313 | 1.00 | 0.00 |
| C    |      |     |     |     |                |        |      |      |
| ATOM | 5757 | CG1 | VAL | 132 | 7.134-106.858  | 29.375 | 1.00 | 0.00 |
| C    |      |     |     |     |                |        |      |      |
| ATOM | 5758 | CG2 | VAL | 132 | 6.176-108.998  | 28.257 | 1.00 | 0.00 |
| C    |      |     |     |     |                |        |      |      |
| ATOM | 5759 | C   | VAL | 132 | 4.473-105.495  | 28.422 | 1.00 | 0.00 |
| C    |      |     |     |     |                |        |      |      |
| ATOM | 5760 | O   | VAL | 132 | 4.104-105.045  | 27.326 | 1.00 | 0.00 |
| O    |      |     |     |     |                |        |      |      |
| ATOM | 5761 | N   | ASP | 133 | 4.857-104.718  | 29.504 | 1.00 | 0.00 |
| N    |      |     |     |     |                |        |      |      |
| ATOM | 5762 | CA  | ASP | 133 | 4.526-103.288  | 29.621 | 1.00 | 0.00 |
| C    |      |     |     |     |                |        |      |      |
| ATOM | 5763 | CB  | ASP | 133 | 4.319-102.904  | 31.122 | 1.00 | 0.00 |
| C    |      |     |     |     |                |        |      |      |
| ATOM | 5764 | CG  | ASP | 133 | 3.847-101.437  | 31.345 | 1.00 | 0.00 |
| C    |      |     |     |     |                |        |      |      |
| ATOM | 5765 | OD1 | ASP | 133 | 3.563-101.071  | 32.537 | 1.00 | 0.00 |
| O    |      |     |     |     |                |        |      |      |
| ATOM | 5766 | OD2 | ASP | 133 | 3.684-100.659  | 30.400 | 1.00 | 0.00 |
| O1-  |      |     |     |     |                |        |      |      |
| ATOM | 5767 | C   | ASP | 133 | 5.611-102.486  | 28.928 | 1.00 | 0.00 |
| C    |      |     |     |     |                |        |      |      |
| ATOM | 5768 | O   | ASP | 133 | 6.784-102.515  | 29.489 | 1.00 | 0.00 |
| O    |      |     |     |     |                |        |      |      |

|      |      |    |     |     |               |        |      |      |
|------|------|----|-----|-----|---------------|--------|------|------|
| ATOM | 5769 | N  | LYS | 134 | 5.449-101.821 | 27.781 | 1.00 | 0.00 |
| N    |      |    |     |     |               |        |      |      |
| ATOM | 5770 | CA | LYS | 134 | 6.511-100.912 | 27.279 | 1.00 | 0.00 |
| C    |      |    |     |     |               |        |      |      |
| ATOM | 5771 | CB | LYS | 134 | 6.089-100.318 | 25.881 | 1.00 | 0.00 |
| C    |      |    |     |     |               |        |      |      |
| ATOM | 5772 | CG | LYS | 134 | 5.907-101.455 | 24.882 | 1.00 | 0.00 |
| C    |      |    |     |     |               |        |      |      |
| ATOM | 5773 | CD | LYS | 134 | 5.582-101.080 | 23.481 | 1.00 | 0.00 |
| C    |      |    |     |     |               |        |      |      |
| ATOM | 5774 | CE | LYS | 134 | 4.429-100.036 | 23.481 | 1.00 | 0.00 |
| C    |      |    |     |     |               |        |      |      |
| ATOM | 5775 | NZ | LYS | 134 | 4.214 -99.501 | 22.088 | 1.00 | 0.00 |
| N1+  |      |    |     |     |               |        |      |      |
| ATOM | 5776 | C  | LYS | 134 | 6.973 -99.803 | 28.275 | 1.00 | 0.00 |
| C    |      |    |     |     |               |        |      |      |
| ATOM | 5777 | O  | LYS | 134 | 8.136 -99.485 | 28.283 | 1.00 | 0.00 |
| O    |      |    |     |     |               |        |      |      |
| ATOM | 5778 | N  | LYS | 135 | 6.010 -99.454 | 29.142 | 1.00 | 0.00 |
| N    |      |    |     |     |               |        |      |      |
| ATOM | 5779 | CA | LYS | 135 | 6.348 -98.467 | 30.221 | 1.00 | 0.00 |
| C    |      |    |     |     |               |        |      |      |
| ATOM | 5780 | CB | LYS | 135 | 5.142 -97.607 | 30.351 | 1.00 | 0.00 |
| C    |      |    |     |     |               |        |      |      |
| ATOM | 5781 | CG | LYS | 135 | 4.673 -96.933 | 29.077 | 1.00 | 0.00 |
| C    |      |    |     |     |               |        |      |      |
| ATOM | 5782 | CD | LYS | 135 | 3.565 -95.888 | 29.201 | 1.00 | 0.00 |
| C    |      |    |     |     |               |        |      |      |
| ATOM | 5783 | CE | LYS | 135 | 3.500 -94.833 | 28.159 | 1.00 | 0.00 |
| C    |      |    |     |     |               |        |      |      |
| ATOM | 5784 | NZ | LYS | 135 | 2.483 -93.761 | 28.585 | 1.00 | 0.00 |
| N1+  |      |    |     |     |               |        |      |      |
| ATOM | 5785 | C  | LYS | 135 | 6.919 -98.976 | 31.524 | 1.00 | 0.00 |
| C    |      |    |     |     |               |        |      |      |
| ATOM | 5786 | O  | LYS | 135 | 7.431 -98.173 | 32.395 | 1.00 | 0.00 |
| O    |      |    |     |     |               |        |      |      |
| ATOM | 5787 | N  | SER | 136 | 6.983-100.295 | 31.848 | 1.00 | 0.00 |
| N    |      |    |     |     |               |        |      |      |
| ATOM | 5788 | CA | SER | 136 | 7.550-100.830 | 33.083 | 1.00 | 0.00 |
| C    |      |    |     |     |               |        |      |      |
| ATOM | 5789 | CB | SER | 136 | 6.561-100.816 | 34.298 | 1.00 | 0.00 |
| C    |      |    |     |     |               |        |      |      |
| ATOM | 5790 | OG | SER | 136 | 5.546-101.819 | 34.118 | 1.00 | 0.00 |
| O    |      |    |     |     |               |        |      |      |
| ATOM | 5791 | C  | SER | 136 | 8.327-102.117 | 32.994 | 1.00 | 0.00 |
| C    |      |    |     |     |               |        |      |      |
| ATOM | 5792 | O  | SER | 136 | 9.120-102.464 | 33.893 | 1.00 | 0.00 |
| O    |      |    |     |     |               |        |      |      |
| ATOM | 5793 | N  | GLY | 137 | 8.107-102.931 | 31.923 | 1.00 | 0.00 |
| N    |      |    |     |     |               |        |      |      |
| ATOM | 5794 | CA | GLY | 137 | 8.543-104.255 | 31.859 | 1.00 | 0.00 |
| C    |      |    |     |     |               |        |      |      |
| ATOM | 5795 | C  | GLY | 137 | 7.718-105.279 | 32.654 | 1.00 | 0.00 |
| C    |      |    |     |     |               |        |      |      |

|      |      |     |     |     |                |        |      |      |
|------|------|-----|-----|-----|----------------|--------|------|------|
| ATOM | 5796 | O   | GLY | 137 | 8.104-106.433  | 32.714 | 1.00 | 0.00 |
| O    |      |     |     |     |                |        |      |      |
| ATOM | 5797 | N   | GLU | 138 | 6.570-104.924  | 33.217 | 1.00 | 0.00 |
| N    |      |     |     |     |                |        |      |      |
| ATOM | 5798 | CA  | GLU | 138 | 5.593-105.793  | 33.893 | 1.00 | 0.00 |
| C    |      |     |     |     |                |        |      |      |
| ATOM | 5799 | CB  | GLU | 138 | 4.558-104.820  | 34.526 | 1.00 | 0.00 |
| C    |      |     |     |     |                |        |      |      |
| ATOM | 5800 | CG  | GLU | 138 | 3.484-105.549  | 35.373 | 1.00 | 0.00 |
| C    |      |     |     |     |                |        |      |      |
| ATOM | 5801 | CD  | GLU | 138 | 2.081-105.139  | 35.128 | 1.00 | 0.00 |
| C    |      |     |     |     |                |        |      |      |
| ATOM | 5802 | OE1 | GLU | 138 | 1.391-105.867  | 34.400 | 1.00 | 0.00 |
| O    |      |     |     |     |                |        |      |      |
| ATOM | 5803 | OE2 | GLU | 138 | 1.664-104.010  | 35.430 | 1.00 | 0.00 |
| O1-  |      |     |     |     |                |        |      |      |
| ATOM | 5804 | C   | GLU | 138 | 4.935-106.771  | 32.920 | 1.00 | 0.00 |
| C    |      |     |     |     |                |        |      |      |
| ATOM | 5805 | O   | GLU | 138 | 4.229-106.325  | 31.957 | 1.00 | 0.00 |
| O    |      |     |     |     |                |        |      |      |
| ATOM | 5806 | N   | LYS | 139 | 5.013-108.066  | 33.177 | 1.00 | 0.00 |
| N    |      |     |     |     |                |        |      |      |
| ATOM | 5807 | CA  | LYS | 139 | 4.358-109.119  | 32.374 | 1.00 | 0.00 |
| C    |      |     |     |     |                |        |      |      |
| ATOM | 5808 | CB  | LYS | 139 | 5.234-110.445  | 32.459 | 1.00 | 0.00 |
| C    |      |     |     |     |                |        |      |      |
| ATOM | 5809 | CG  | LYS | 139 | 6.683-110.341  | 31.966 | 1.00 | 0.00 |
| C    |      |     |     |     |                |        |      |      |
| ATOM | 5810 | CD  | LYS | 139 | 7.451-111.673  | 31.768 | 1.00 | 0.00 |
| C    |      |     |     |     |                |        |      |      |
| ATOM | 5811 | CE  | LYS | 139 | 8.789-111.506  | 30.966 | 1.00 | 0.00 |
| C    |      |     |     |     |                |        |      |      |
| ATOM | 5812 | NZ  | LYS | 139 | 9.466-112.813  | 30.815 | 1.00 | 0.00 |
| N1+  |      |     |     |     |                |        |      |      |
| ATOM | 5813 | C   | LYS | 139 | 2.916-109.392  | 32.825 | 1.00 | 0.00 |
| C    |      |     |     |     |                |        |      |      |
| ATOM | 5814 | O   | LYS | 139 | 2.764-109.358  | 34.058 | 1.00 | 0.00 |
| O    |      |     |     |     |                |        |      |      |
| ATOM | 5815 | N   | SER | 140 | 1.970-109.544  | 31.976 | 1.00 | 0.00 |
| N    |      |     |     |     |                |        |      |      |
| ATOM | 5816 | CA  | SER | 140 | 0.516-109.787  | 32.281 | 1.00 | 0.00 |
| C    |      |     |     |     |                |        |      |      |
| ATOM | 5817 | CB  | SER | 140 | -0.309-109.906 | 30.994 | 1.00 | 0.00 |
| C    |      |     |     |     |                |        |      |      |
| ATOM | 5818 | OG  | SER | 140 | -0.008-110.909 | 30.040 | 1.00 | 0.00 |
| O    |      |     |     |     |                |        |      |      |
| ATOM | 5819 | C   | SER | 140 | 0.312-111.053  | 33.157 | 1.00 | 0.00 |
| C    |      |     |     |     |                |        |      |      |
| ATOM | 5820 | O   | SER | 140 | 0.937-112.078  | 33.033 | 1.00 | 0.00 |
| O    |      |     |     |     |                |        |      |      |
| ATOM | 5821 | N   | LYS | 141 | -0.726-111.084 | 33.975 | 1.00 | 0.00 |
| N    |      |     |     |     |                |        |      |      |
| ATOM | 5822 | CA  | LYS | 141 | -1.324-112.255 | 34.639 | 1.00 | 0.00 |
| C    |      |     |     |     |                |        |      |      |

|      |      |     |     |     |        |          |        |      |      |
|------|------|-----|-----|-----|--------|----------|--------|------|------|
| ATOM | 5823 | CB  | LYS | 141 | -2.436 | -111.828 | 35.685 | 1.00 | 0.00 |
| C    |      |     |     |     |        |          |        |      |      |
| ATOM | 5824 | CG  | LYS | 141 | -2.657 | -112.694 | 37.002 | 1.00 | 0.00 |
| C    |      |     |     |     |        |          |        |      |      |
| ATOM | 5825 | CD  | LYS | 141 | -3.988 | -112.395 | 37.737 | 1.00 | 0.00 |
| C    |      |     |     |     |        |          |        |      |      |
| ATOM | 5826 | CE  | LYS | 141 | -4.294 | -113.257 | 38.952 | 1.00 | 0.00 |
| C    |      |     |     |     |        |          |        |      |      |
| ATOM | 5827 | NZ  | LYS | 141 | -5.610 | -112.974 | 39.531 | 1.00 | 0.00 |
| N1+  |      |     |     |     |        |          |        |      |      |
| ATOM | 5828 | C   | LYS | 141 | -1.837 | -113.396 | 33.726 | 1.00 | 0.00 |
| C    |      |     |     |     |        |          |        |      |      |
| ATOM | 5829 | O   | LYS | 141 | -1.793 | -114.558 | 34.217 | 1.00 | 0.00 |
| O    |      |     |     |     |        |          |        |      |      |
| ATOM | 5830 | N   | THR | 142 | -2.282 | -113.033 | 32.500 | 1.00 | 0.00 |
| N    |      |     |     |     |        |          |        |      |      |
| ATOM | 5831 | CA  | THR | 142 | -3.089 | -113.912 | 31.618 | 1.00 | 0.00 |
| C    |      |     |     |     |        |          |        |      |      |
| ATOM | 5832 | CB  | THR | 142 | -4.593 | -113.796 | 31.848 | 1.00 | 0.00 |
| C    |      |     |     |     |        |          |        |      |      |
| ATOM | 5833 | CG2 | THR | 142 | -5.134 | -112.500 | 31.307 | 1.00 | 0.00 |
| C    |      |     |     |     |        |          |        |      |      |
| ATOM | 5834 | OG1 | THR | 142 | -5.221 | -114.931 | 31.360 | 1.00 | 0.00 |
| O    |      |     |     |     |        |          |        |      |      |
| ATOM | 5835 | C   | THR | 142 | -2.721 | -113.826 | 30.145 | 1.00 | 0.00 |
| C    |      |     |     |     |        |          |        |      |      |
| ATOM | 5836 | O   | THR | 142 | -2.077 | -112.820 | 29.813 | 1.00 | 0.00 |
| O    |      |     |     |     |        |          |        |      |      |
| ATOM | 5837 | N   | ARG | 143 | -3.003 | -114.873 | 29.334 | 1.00 | 0.00 |
| N    |      |     |     |     |        |          |        |      |      |
| ATOM | 5838 | CA  | ARG | 143 | -2.708 | -114.961 | 27.910 | 1.00 | 0.00 |
| C    |      |     |     |     |        |          |        |      |      |
| ATOM | 5839 | CB  | ARG | 143 | -2.935 | -116.431 | 27.369 | 1.00 | 0.00 |
| C    |      |     |     |     |        |          |        |      |      |
| ATOM | 5840 | CG  | ARG | 143 | -1.977 | -117.420 | 28.086 | 1.00 | 0.00 |
| C    |      |     |     |     |        |          |        |      |      |
| ATOM | 5841 | CD  | ARG | 143 | -2.266 | -118.963 | 27.978 | 1.00 | 0.00 |
| C    |      |     |     |     |        |          |        |      |      |
| ATOM | 5842 | NE  | ARG | 143 | -3.696 | -119.192 | 28.364 | 1.00 | 0.00 |
| N    |      |     |     |     |        |          |        |      |      |
| ATOM | 5843 | CZ  | ARG | 143 | -4.308 | -120.329 | 28.443 | 1.00 | 0.00 |
| C    |      |     |     |     |        |          |        |      |      |
| ATOM | 5844 | NH1 | ARG | 143 | -3.787 | -121.512 | 28.270 | 1.00 | 0.00 |
| N    |      |     |     |     |        |          |        |      |      |
| ATOM | 5845 | NH2 | ARG | 143 | -5.596 | -120.341 | 28.774 | 1.00 | 0.00 |
| N1+  |      |     |     |     |        |          |        |      |      |
| ATOM | 5846 | C   | ARG | 143 | -3.589 | -113.971 | 27.098 | 1.00 | 0.00 |
| C    |      |     |     |     |        |          |        |      |      |
| ATOM | 5847 | O   | ARG | 143 | -4.783 | -113.849 | 27.482 | 1.00 | 0.00 |
| O    |      |     |     |     |        |          |        |      |      |
| ATOM | 5848 | N   | PRO | 144 | -3.089 | -113.195 | 26.162 | 1.00 | 0.00 |
| N    |      |     |     |     |        |          |        |      |      |
| ATOM | 5849 | CD  | PRO | 144 | -1.702 | -112.868 | 25.976 | 1.00 | 0.00 |
| C    |      |     |     |     |        |          |        |      |      |

|      |      |     |     |     |                 |        |      |      |
|------|------|-----|-----|-----|-----------------|--------|------|------|
| ATOM | 5850 | CG  | PRO | 144 | -1.651-111.431  | 25.345 | 1.00 | 0.00 |
| C    |      |     |     |     |                 |        |      |      |
| ATOM | 5851 | CB  | PRO | 144 | -2.938-111.403  | 24.559 | 1.00 | 0.00 |
| C    |      |     |     |     |                 |        |      |      |
| ATOM | 5852 | CA  | PRO | 144 | -3.936-112.308  | 25.344 | 1.00 | 0.00 |
| C    |      |     |     |     |                 |        |      |      |
| ATOM | 5853 | C   | PRO | 144 | -4.841-113.098  | 24.419 | 1.00 | 0.00 |
| C    |      |     |     |     |                 |        |      |      |
| ATOM | 5854 | O   | PRO | 144 | -4.614-114.306  | 24.121 | 1.00 | 0.00 |
| O    |      |     |     |     |                 |        |      |      |
| ATOM | 5855 | N   | ARG | 145 | -5.860-112.337  | 23.958 | 1.00 | 0.00 |
| N    |      |     |     |     |                 |        |      |      |
| ATOM | 5856 | CA  | ARG | 145 | -6.750-112.757  | 22.850 | 1.00 | 0.00 |
| C    |      |     |     |     |                 |        |      |      |
| ATOM | 5857 | CB  | ARG | 145 | -8.210-112.354  | 23.020 | 1.00 | 0.00 |
| C    |      |     |     |     |                 |        |      |      |
| ATOM | 5858 | CG  | ARG | 145 | -8.866-112.979  | 24.238 | 1.00 | 0.00 |
| C    |      |     |     |     |                 |        |      |      |
| ATOM | 5859 | CD  | ARG | 145 | -10.342-112.744 | 24.176 | 1.00 | 0.00 |
| C    |      |     |     |     |                 |        |      |      |
| ATOM | 5860 | NE  | ARG | 145 | -10.652-111.305 | 24.356 | 1.00 | 0.00 |
| N    |      |     |     |     |                 |        |      |      |
| ATOM | 5861 | CZ  | ARG | 145 | -11.214-110.526 | 23.461 | 1.00 | 0.00 |
| C    |      |     |     |     |                 |        |      |      |
| ATOM | 5862 | NH1 | ARG | 145 | -11.448-110.908 | 22.192 | 1.00 | 0.00 |
| N    |      |     |     |     |                 |        |      |      |
| ATOM | 5863 | NH2 | ARG | 145 | -11.487-109.300 | 23.784 | 1.00 | 0.00 |
| N1+  |      |     |     |     |                 |        |      |      |
| ATOM | 5864 | C   | ARG | 145 | -6.170-112.245  | 21.544 | 1.00 | 0.00 |
| C    |      |     |     |     |                 |        |      |      |
| ATOM | 5865 | O   | ARG | 145 | -6.241-112.971  | 20.565 | 1.00 | 0.00 |
| O    |      |     |     |     |                 |        |      |      |
| ATOM | 5866 | N   | PHE | 146 | -5.604-111.010  | 21.553 | 1.00 | 0.00 |
| N    |      |     |     |     |                 |        |      |      |
| ATOM | 5867 | CA  | PHE | 146 | -5.005-110.437  | 20.404 | 1.00 | 0.00 |
| C    |      |     |     |     |                 |        |      |      |
| ATOM | 5868 | CB  | PHE | 146 | -6.059-109.516  | 19.704 | 1.00 | 0.00 |
| C    |      |     |     |     |                 |        |      |      |
| ATOM | 5869 | CG  | PHE | 146 | -7.320-110.191  | 19.035 | 1.00 | 0.00 |
| C    |      |     |     |     |                 |        |      |      |
| ATOM | 5870 | CD1 | PHE | 146 | -8.619-109.884  | 19.440 | 1.00 | 0.00 |
| C    |      |     |     |     |                 |        |      |      |
| ATOM | 5871 | CE1 | PHE | 146 | -9.704-110.464  | 18.689 | 1.00 | 0.00 |
| C    |      |     |     |     |                 |        |      |      |
| ATOM | 5872 | CZ  | PHE | 146 | -9.441-111.351  | 17.636 | 1.00 | 0.00 |
| C    |      |     |     |     |                 |        |      |      |
| ATOM | 5873 | CE2 | PHE | 146 | -8.142-111.651  | 17.198 | 1.00 | 0.00 |
| C    |      |     |     |     |                 |        |      |      |
| ATOM | 5874 | CD2 | PHE | 146 | -7.072-111.054  | 17.904 | 1.00 | 0.00 |
| C    |      |     |     |     |                 |        |      |      |
| ATOM | 5875 | C   | PHE | 146 | -3.818-109.607  | 20.822 | 1.00 | 0.00 |
| C    |      |     |     |     |                 |        |      |      |
| ATOM | 5876 | O   | PHE | 146 | -3.658-109.260  | 21.979 | 1.00 | 0.00 |
| O    |      |     |     |     |                 |        |      |      |

|      |      |     |     |     |        |          |        |      |      |
|------|------|-----|-----|-----|--------|----------|--------|------|------|
| ATOM | 5877 | N   | VAL | 147 | -2.934 | -109.461 | 19.821 | 1.00 | 0.00 |
| N    |      |     |     |     |        |          |        |      |      |
| ATOM | 5878 | CA  | VAL | 147 | -1.642 | -108.678 | 19.925 | 1.00 | 0.00 |
| C    |      |     |     |     |        |          |        |      |      |
| ATOM | 5879 | CB  | VAL | 147 | -0.443 | -109.533 | 20.399 | 1.00 | 0.00 |
| C    |      |     |     |     |        |          |        |      |      |
| ATOM | 5880 | CG1 | VAL | 147 | -0.510 | -109.966 | 21.901 | 1.00 | 0.00 |
| C    |      |     |     |     |        |          |        |      |      |
| ATOM | 5881 | CG2 | VAL | 147 | -0.008 | -110.628 | 19.453 | 1.00 | 0.00 |
| C    |      |     |     |     |        |          |        |      |      |
| ATOM | 5882 | C   | VAL | 147 | -1.388 | -107.936 | 18.633 | 1.00 | 0.00 |
| C    |      |     |     |     |        |          |        |      |      |
| ATOM | 5883 | O   | VAL | 147 | -1.388 | -108.560 | 17.575 | 1.00 | 0.00 |
| O    |      |     |     |     |        |          |        |      |      |
| ATOM | 5884 | N   | LYS | 148 | -1.171 | -106.618 | 18.757 | 1.00 | 0.00 |
| N    |      |     |     |     |        |          |        |      |      |
| ATOM | 5885 | CA  | LYS | 148 | -1.441 | -105.602 | 17.749 | 1.00 | 0.00 |
| C    |      |     |     |     |        |          |        |      |      |
| ATOM | 5886 | CB  | LYS | 148 | -2.894 | -105.083 | 18.125 | 1.00 | 0.00 |
| C    |      |     |     |     |        |          |        |      |      |
| ATOM | 5887 | CG  | LYS | 148 | -3.498 | -103.912 | 17.388 | 1.00 | 0.00 |
| C    |      |     |     |     |        |          |        |      |      |
| ATOM | 5888 | CD  | LYS | 148 | -3.635 | -104.070 | 15.929 | 1.00 | 0.00 |
| C    |      |     |     |     |        |          |        |      |      |
| ATOM | 5889 | CE  | LYS | 148 | -4.175 | -102.747 | 15.352 | 1.00 | 0.00 |
| C    |      |     |     |     |        |          |        |      |      |
| ATOM | 5890 | NZ  | LYS | 148 | -4.065 | -102.505 | 13.903 | 1.00 | 0.00 |
| N1+  |      |     |     |     |        |          |        |      |      |
| ATOM | 5891 | C   | LYS | 148 | -0.384 | -104.475 | 17.770 | 1.00 | 0.00 |
| C    |      |     |     |     |        |          |        |      |      |
| ATOM | 5892 | O   | LYS | 148 | 0.159  | -104.228 | 18.818 | 1.00 | 0.00 |
| O    |      |     |     |     |        |          |        |      |      |
| ATOM | 5893 | N   | GLN | 149 | -0.138 | -103.823 | 16.615 | 1.00 | 0.00 |
| N    |      |     |     |     |        |          |        |      |      |
| ATOM | 5894 | CA  | GLN | 149 | 0.295  | -102.462 | 16.450 | 1.00 | 0.00 |
| C    |      |     |     |     |        |          |        |      |      |
| ATOM | 5895 | CB  | GLN | 149 | -0.539 | -101.436 | 17.173 | 1.00 | 0.00 |
| C    |      |     |     |     |        |          |        |      |      |
| ATOM | 5896 | CG  | GLN | 149 | -0.070 | -100.049 | 16.741 | 1.00 | 0.00 |
| C    |      |     |     |     |        |          |        |      |      |
| ATOM | 5897 | CD  | GLN | 149 | -1.169 | -99.026  | 16.716 | 1.00 | 0.00 |
| C    |      |     |     |     |        |          |        |      |      |
| ATOM | 5898 | OE1 | GLN | 149 | -2.096 | -99.152  | 17.476 | 1.00 | 0.00 |
| O    |      |     |     |     |        |          |        |      |      |
| ATOM | 5899 | NE2 | GLN | 149 | -1.067 | -98.065  | 15.848 | 1.00 | 0.00 |
| N    |      |     |     |     |        |          |        |      |      |
| ATOM | 5900 | C   | GLN | 149 | 1.826  | -102.295 | 16.542 | 1.00 | 0.00 |
| C    |      |     |     |     |        |          |        |      |      |
| ATOM | 5901 | O   | GLN | 149 | 2.535  | -102.112 | 15.584 | 1.00 | 0.00 |
| O    |      |     |     |     |        |          |        |      |      |
| ATOM | 5902 | N   | ASP | 150 | 2.318  | -102.473 | 17.772 | 1.00 | 0.00 |
| N    |      |     |     |     |        |          |        |      |      |
| ATOM | 5903 | CA  | ASP | 150 | 3.684  | -102.152 | 18.148 | 1.00 | 0.00 |
| C    |      |     |     |     |        |          |        |      |      |

|      |      |     |     |     |                |        |      |      |
|------|------|-----|-----|-----|----------------|--------|------|------|
| ATOM | 5904 | CB  | ASP | 150 | 3.751-100.613  | 18.221 | 1.00 | 0.00 |
| C    |      |     |     |     |                |        |      |      |
| ATOM | 5905 | CG  | ASP | 150 | 3.099 -99.844  | 19.423 | 1.00 | 0.00 |
| C    |      |     |     |     |                |        |      |      |
| ATOM | 5906 | OD1 | ASP | 150 | 3.210 -98.623  | 19.421 | 1.00 | 0.00 |
| O    |      |     |     |     |                |        |      |      |
| ATOM | 5907 | OD2 | ASP | 150 | 2.463-100.420  | 20.259 | 1.00 | 0.00 |
| O1-  |      |     |     |     |                |        |      |      |
| ATOM | 5908 | C   | ASP | 150 | 4.144-102.848  | 19.528 | 1.00 | 0.00 |
| C    |      |     |     |     |                |        |      |      |
| ATOM | 5909 | O   | ASP | 150 | 5.201-102.548  | 20.096 | 1.00 | 0.00 |
| O    |      |     |     |     |                |        |      |      |
| ATOM | 5910 | N   | GLN | 151 | 3.265-103.687  | 20.086 | 1.00 | 0.00 |
| N    |      |     |     |     |                |        |      |      |
| ATOM | 5911 | CA  | GLN | 151 | 3.485-104.397  | 21.391 | 1.00 | 0.00 |
| C    |      |     |     |     |                |        |      |      |
| ATOM | 5912 | CB  | GLN | 151 | 2.152-105.187  | 21.583 | 1.00 | 0.00 |
| C    |      |     |     |     |                |        |      |      |
| ATOM | 5913 | CG  | GLN | 151 | 0.991-104.249  | 22.065 | 1.00 | 0.00 |
| C    |      |     |     |     |                |        |      |      |
| ATOM | 5914 | CD  | GLN | 151 | -0.391-104.876 | 21.980 | 1.00 | 0.00 |
| C    |      |     |     |     |                |        |      |      |
| ATOM | 5915 | OE1 | GLN | 151 | -0.644-105.909 | 21.414 | 1.00 | 0.00 |
| O    |      |     |     |     |                |        |      |      |
| ATOM | 5916 | NE2 | GLN | 151 | -1.343-104.251 | 22.694 | 1.00 | 0.00 |
| N    |      |     |     |     |                |        |      |      |
| ATOM | 5917 | C   | GLN | 151 | 4.697-105.271  | 21.592 | 1.00 | 0.00 |
| C    |      |     |     |     |                |        |      |      |
| ATOM | 5918 | O   | GLN | 151 | 5.202-105.821  | 20.669 | 1.00 | 0.00 |
| O    |      |     |     |     |                |        |      |      |
| ATOM | 5919 | N   | VAL | 152 | 5.022-105.557  | 22.843 | 1.00 | 0.00 |
| N    |      |     |     |     |                |        |      |      |
| ATOM | 5920 | CA  | VAL | 152 | 6.063-106.556  | 23.224 | 1.00 | 0.00 |
| C    |      |     |     |     |                |        |      |      |
| ATOM | 5921 | CB  | VAL | 152 | 7.166-105.936  | 24.001 | 1.00 | 0.00 |
| C    |      |     |     |     |                |        |      |      |
| ATOM | 5922 | CG1 | VAL | 152 | 8.080-105.225  | 22.920 | 1.00 | 0.00 |
| C    |      |     |     |     |                |        |      |      |
| ATOM | 5923 | CG2 | VAL | 152 | 6.720-104.918  | 25.002 | 1.00 | 0.00 |
| C    |      |     |     |     |                |        |      |      |
| ATOM | 5924 | C   | VAL | 152 | 5.444-107.768  | 23.927 | 1.00 | 0.00 |
| C    |      |     |     |     |                |        |      |      |
| ATOM | 5925 | O   | VAL | 152 | 4.656-107.645  | 24.849 | 1.00 | 0.00 |
| O    |      |     |     |     |                |        |      |      |
| ATOM | 5926 | N   | CYS | 153 | 5.730-108.987  | 23.586 | 1.00 | 0.00 |
| N    |      |     |     |     |                |        |      |      |
| ATOM | 5927 | CA  | CYS | 153 | 5.089-110.173  | 24.068 | 1.00 | 0.00 |
| C    |      |     |     |     |                |        |      |      |
| ATOM | 5928 | CB  | CYS | 153 | 3.834-110.367  | 23.278 | 1.00 | 0.00 |
| C    |      |     |     |     |                |        |      |      |
| ATOM | 5929 | SG  | CYS | 153 | 2.783-111.678  | 23.985 | 1.00 | 0.00 |
| S    |      |     |     |     |                |        |      |      |
| ATOM | 5930 | C   | CYS | 153 | 6.045-111.405  | 24.010 | 1.00 | 0.00 |
| C    |      |     |     |     |                |        |      |      |

|      |      |     |     |     |               |        |      |      |
|------|------|-----|-----|-----|---------------|--------|------|------|
| ATOM | 5931 | O   | CYS | 153 | 6.799-111.545 | 23.036 | 1.00 | 0.00 |
| O    |      |     |     |     |               |        |      |      |
| ATOM | 5932 | N   | ILE | 154 | 5.845-112.415 | 24.880 | 1.00 | 0.00 |
| N    |      |     |     |     |               |        |      |      |
| ATOM | 5933 | CA  | ILE | 154 | 6.527-113.738 | 24.956 | 1.00 | 0.00 |
| C    |      |     |     |     |               |        |      |      |
| ATOM | 5934 | CB  | ILE | 154 | 6.676-114.069 | 26.441 | 1.00 | 0.00 |
| C    |      |     |     |     |               |        |      |      |
| ATOM | 5935 | CG2 | ILE | 154 | 7.231-115.507 | 26.561 | 1.00 | 0.00 |
| C    |      |     |     |     |               |        |      |      |
| ATOM | 5936 | CG1 | ILE | 154 | 7.498-113.018 | 27.192 | 1.00 | 0.00 |
| C    |      |     |     |     |               |        |      |      |
| ATOM | 5937 | CD1 | ILE | 154 | 8.807-112.706 | 26.456 | 1.00 | 0.00 |
| C    |      |     |     |     |               |        |      |      |
| ATOM | 5938 | C   | ILE | 154 | 5.673-114.729 | 24.161 | 1.00 | 0.00 |
| C    |      |     |     |     |               |        |      |      |
| ATOM | 5939 | O   | ILE | 154 | 4.531-114.971 | 24.534 | 1.00 | 0.00 |
| O    |      |     |     |     |               |        |      |      |
| ATOM | 5940 | N   | ALA | 155 | 6.226-115.333 | 23.105 | 1.00 | 0.00 |
| N    |      |     |     |     |               |        |      |      |
| ATOM | 5941 | CA  | ALA | 155 | 5.552-116.332 | 22.279 | 1.00 | 0.00 |
| C    |      |     |     |     |               |        |      |      |
| ATOM | 5942 | CB  | ALA | 155 | 5.504-115.641 | 20.883 | 1.00 | 0.00 |
| C    |      |     |     |     |               |        |      |      |
| ATOM | 5943 | C   | ALA | 155 | 6.226-117.816 | 22.258 | 1.00 | 0.00 |
| C    |      |     |     |     |               |        |      |      |
| ATOM | 5944 | O   | ALA | 155 | 7.432-117.954 | 22.498 | 1.00 | 0.00 |
| O    |      |     |     |     |               |        |      |      |
| ATOM | 5945 | N   | ARG | 156 | 5.400-118.774 | 21.815 | 1.00 | 0.00 |
| N    |      |     |     |     |               |        |      |      |
| ATOM | 5946 | CA  | ARG | 156 | 5.867-120.097 | 21.323 | 1.00 | 0.00 |
| C    |      |     |     |     |               |        |      |      |
| ATOM | 5947 | CB  | ARG | 156 | 5.254-121.171 | 22.194 | 1.00 | 0.00 |
| C    |      |     |     |     |               |        |      |      |
| ATOM | 5948 | CG  | ARG | 156 | 5.874-122.621 | 22.090 | 1.00 | 0.00 |
| C    |      |     |     |     |               |        |      |      |
| ATOM | 5949 | CD  | ARG | 156 | 5.598-123.464 | 23.365 | 1.00 | 0.00 |
| C    |      |     |     |     |               |        |      |      |
| ATOM | 5950 | NE  | ARG | 156 | 6.541-123.105 | 24.412 | 1.00 | 0.00 |
| N    |      |     |     |     |               |        |      |      |
| ATOM | 5951 | CZ  | ARG | 156 | 6.701-123.904 | 25.469 | 1.00 | 0.00 |
| C    |      |     |     |     |               |        |      |      |
| ATOM | 5952 | NH1 | ARG | 156 | 5.864-124.771 | 25.883 | 1.00 | 0.00 |
| N    |      |     |     |     |               |        |      |      |
| ATOM | 5953 | NH2 | ARG | 156 | 7.760-123.718 | 26.204 | 1.00 | 0.00 |
| N1+  |      |     |     |     |               |        |      |      |
| ATOM | 5954 | C   | ARG | 156 | 5.610-120.265 | 19.849 | 1.00 | 0.00 |
| C    |      |     |     |     |               |        |      |      |
| ATOM | 5955 | O   | ARG | 156 | 4.655-119.754 | 19.220 | 1.00 | 0.00 |
| O    |      |     |     |     |               |        |      |      |
| ATOM | 5956 | N   | LEU | 157 | 6.559-121.064 | 19.212 | 1.00 | 0.00 |
| N    |      |     |     |     |               |        |      |      |
| ATOM | 5957 | CA  | LEU | 157 | 6.618-121.296 | 17.785 | 1.00 | 0.00 |
| C    |      |     |     |     |               |        |      |      |



|      |      |     |     |     |               |        |      |      |
|------|------|-----|-----|-----|---------------|--------|------|------|
| ATOM | 5958 | CB  | LEU | 157 | 7.766-120.436 | 17.187 | 1.00 | 0.00 |
| C    |      |     |     |     |               |        |      |      |
| ATOM | 5959 | CG  | LEU | 157 | 7.677-118.893 | 17.058 | 1.00 | 0.00 |
| C    |      |     |     |     |               |        |      |      |
| ATOM | 5960 | CD1 | LEU | 157 | 6.472-118.385 | 16.307 | 1.00 | 0.00 |
| C    |      |     |     |     |               |        |      |      |
| ATOM | 5961 | CD2 | LEU | 157 | 7.896-118.112 | 18.406 | 1.00 | 0.00 |
| C    |      |     |     |     |               |        |      |      |
| ATOM | 5962 | C   | LEU | 157 | 6.736-122.796 | 17.394 | 1.00 | 0.00 |
| C    |      |     |     |     |               |        |      |      |
| ATOM | 5963 | O   | LEU | 157 | 7.334-123.539 | 18.158 | 1.00 | 0.00 |
| O    |      |     |     |     |               |        |      |      |
| ATOM | 5964 | N   | ARG | 158 | 6.139-123.201 | 16.272 | 1.00 | 0.00 |
| N    |      |     |     |     |               |        |      |      |
| ATOM | 5965 | CA  | ARG | 158 | 6.065-124.607 | 15.802 | 1.00 | 0.00 |
| C    |      |     |     |     |               |        |      |      |
| ATOM | 5966 | CB  | ARG | 158 | 4.822-125.110 | 16.529 | 1.00 | 0.00 |
| C    |      |     |     |     |               |        |      |      |
| ATOM | 5967 | CG  | ARG | 158 | 4.365-126.501 | 15.936 | 1.00 | 0.00 |
| C    |      |     |     |     |               |        |      |      |
| ATOM | 5968 | CD  | ARG | 158 | 3.564-127.299 | 17.028 | 1.00 | 0.00 |
| C    |      |     |     |     |               |        |      |      |
| ATOM | 5969 | NE  | ARG | 158 | 2.161-126.910 | 17.062 | 1.00 | 0.00 |
| N    |      |     |     |     |               |        |      |      |
| ATOM | 5970 | CZ  | ARG | 158 | 1.293-127.310 | 17.991 | 1.00 | 0.00 |
| C    |      |     |     |     |               |        |      |      |
| ATOM | 5971 | NH1 | ARG | 158 | 1.693-128.036 | 18.971 | 1.00 | 0.00 |
| N    |      |     |     |     |               |        |      |      |
| ATOM | 5972 | NH2 | ARG | 158 | 0.075-126.990 | 17.878 | 1.00 | 0.00 |
| N1+  |      |     |     |     |               |        |      |      |
| ATOM | 5973 | C   | ARG | 158 | 5.924-124.633 | 14.277 | 1.00 | 0.00 |
| C    |      |     |     |     |               |        |      |      |
| ATOM | 5974 | O   | ARG | 158 | 4.939-124.221 | 13.722 | 1.00 | 0.00 |
| O    |      |     |     |     |               |        |      |      |
| ATOM | 5975 | N   | THR | 159 | 6.979-125.167 | 13.590 | 1.00 | 0.00 |
| N    |      |     |     |     |               |        |      |      |
| ATOM | 5976 | CA  | THR | 159 | 7.027-125.229 | 12.138 | 1.00 | 0.00 |
| C    |      |     |     |     |               |        |      |      |
| ATOM | 5977 | CB  | THR | 159 | 8.466-125.059 | 11.554 | 1.00 | 0.00 |
| C    |      |     |     |     |               |        |      |      |
| ATOM | 5978 | CG2 | THR | 159 | 8.834-123.546 | 11.637 | 1.00 | 0.00 |
| C    |      |     |     |     |               |        |      |      |
| ATOM | 5979 | OG1 | THR | 159 | 9.372-125.881 | 12.315 | 1.00 | 0.00 |
| O    |      |     |     |     |               |        |      |      |
| ATOM | 5980 | C   | THR | 159 | 6.189-126.364 | 11.614 | 1.00 | 0.00 |
| C    |      |     |     |     |               |        |      |      |
| ATOM | 5981 | O   | THR | 159 | 5.741-127.322 | 12.309 | 1.00 | 0.00 |
| O    |      |     |     |     |               |        |      |      |
| ATOM | 5982 | N   | ALA | 160 | 5.968-126.344 | 10.260 | 1.00 | 0.00 |
| N    |      |     |     |     |               |        |      |      |
| ATOM | 5983 | CA  | ALA | 160 | 5.374-127.403 | 9.527  | 1.00 | 0.00 |
| C    |      |     |     |     |               |        |      |      |
| ATOM | 5984 | CB  | ALA | 160 | 4.940-126.879 | 8.219  | 1.00 | 0.00 |
| C    |      |     |     |     |               |        |      |      |

|      |      |     |     |     |                |        |      |      |
|------|------|-----|-----|-----|----------------|--------|------|------|
| ATOM | 5985 | C   | ALA | 160 | 6.282-128.624  | 9.481  | 1.00 | 0.00 |
| C    |      |     |     |     |                |        |      |      |
| ATOM | 5986 | O   | ALA | 160 | 5.751-129.746  | 9.282  | 1.00 | 0.00 |
| O    |      |     |     |     |                |        |      |      |
| ATOM | 5987 | N   | GLY | 161 | 7.624-128.425  | 9.613  | 1.00 | 0.00 |
| N    |      |     |     |     |                |        |      |      |
| ATOM | 5988 | CA  | GLY | 161 | 8.785-129.341  | 9.262  | 1.00 | 0.00 |
| C    |      |     |     |     |                |        |      |      |
| ATOM | 5989 | C   | GLY | 161 | 10.065-128.865 | 9.942  | 1.00 | 0.00 |
| C    |      |     |     |     |                |        |      |      |
| ATOM | 5990 | O   | GLY | 161 | 10.099-127.858 | 10.639 | 1.00 | 0.00 |
| O    |      |     |     |     |                |        |      |      |
| ATOM | 5991 | N   | THR | 162 | 11.068-129.687 | 9.755  | 1.00 | 0.00 |
| N    |      |     |     |     |                |        |      |      |
| ATOM | 5992 | CA  | THR | 162 | 12.352-129.644 | 10.516 | 1.00 | 0.00 |
| C    |      |     |     |     |                |        |      |      |
| ATOM | 5993 | CB  | THR | 162 | 12.908-131.022 | 10.674 | 1.00 | 0.00 |
| C    |      |     |     |     |                |        |      |      |
| ATOM | 5994 | CG2 | THR | 162 | 14.131-131.011 | 11.602 | 1.00 | 0.00 |
| C    |      |     |     |     |                |        |      |      |
| ATOM | 5995 | OG1 | THR | 162 | 11.947-131.762 | 11.353 | 1.00 | 0.00 |
| O    |      |     |     |     |                |        |      |      |
| ATOM | 5996 | C   | THR | 162 | 13.342-128.627 | 9.833  | 1.00 | 0.00 |
| C    |      |     |     |     |                |        |      |      |
| ATOM | 5997 | O   | THR | 162 | 13.437-128.640 | 8.580  | 1.00 | 0.00 |
| O    |      |     |     |     |                |        |      |      |
| ATOM | 5998 | N   | ILE | 163 | 13.928-127.804 | 10.669 | 1.00 | 0.00 |
| N    |      |     |     |     |                |        |      |      |
| ATOM | 5999 | CA  | ILE | 163 | 14.822-126.702 | 10.302 | 1.00 | 0.00 |
| C    |      |     |     |     |                |        |      |      |
| ATOM | 6000 | CB  | ILE | 163 | 14.073-125.462 | 10.159 | 1.00 | 0.00 |
| C    |      |     |     |     |                |        |      |      |
| ATOM | 6001 | CG2 | ILE | 163 | 13.095-125.485 | 8.913  | 1.00 | 0.00 |
| C    |      |     |     |     |                |        |      |      |
| ATOM | 6002 | CG1 | ILE | 163 | 13.292-125.141 | 11.494 | 1.00 | 0.00 |
| C    |      |     |     |     |                |        |      |      |
| ATOM | 6003 | CD1 | ILE | 163 | 12.774-123.678 | 11.592 | 1.00 | 0.00 |
| C    |      |     |     |     |                |        |      |      |
| ATOM | 6004 | C   | ILE | 163 | 16.052-126.573 | 11.224 | 1.00 | 0.00 |
| C    |      |     |     |     |                |        |      |      |
| ATOM | 6005 | O   | ILE | 163 | 16.004-126.985 | 12.360 | 1.00 | 0.00 |
| O    |      |     |     |     |                |        |      |      |
| ATOM | 6006 | N   | CYS | 164 | 17.167-126.169 | 10.680 | 1.00 | 0.00 |
| N    |      |     |     |     |                |        |      |      |
| ATOM | 6007 | CA  | CYS | 164 | 18.449-125.848 | 11.405 | 1.00 | 0.00 |
| C    |      |     |     |     |                |        |      |      |
| ATOM | 6008 | CB  | CYS | 164 | 19.674-126.087 | 10.486 | 1.00 | 0.00 |
| C    |      |     |     |     |                |        |      |      |
| ATOM | 6009 | SG  | CYS | 164 | 21.177-126.039 | 11.461 | 1.00 | 0.00 |
| S    |      |     |     |     |                |        |      |      |
| ATOM | 6010 | C   | CYS | 164 | 18.394-124.430 | 12.071 | 1.00 | 0.00 |
| C    |      |     |     |     |                |        |      |      |
| ATOM | 6011 | O   | CYS | 164 | 17.908-123.433 | 11.517 | 1.00 | 0.00 |
| O    |      |     |     |     |                |        |      |      |

|      |      |     |     |     |                |        |      |      |
|------|------|-----|-----|-----|----------------|--------|------|------|
| ATOM | 6012 | N   | LEU | 165 | 18.796-124.342 | 13.359 | 1.00 | 0.00 |
| N    |      |     |     |     |                |        |      |      |
| ATOM | 6013 | CA  | LEU | 165 | 18.506-123.182 | 14.177 | 1.00 | 0.00 |
| C    |      |     |     |     |                |        |      |      |
| ATOM | 6014 | CB  | LEU | 165 | 17.340-123.489 | 15.105 | 1.00 | 0.00 |
| C    |      |     |     |     |                |        |      |      |
| ATOM | 6015 | CG  | LEU | 165 | 15.969-123.754 | 14.501 | 1.00 | 0.00 |
| C    |      |     |     |     |                |        |      |      |
| ATOM | 6016 | CD1 | LEU | 165 | 15.177-124.772 | 15.315 | 1.00 | 0.00 |
| C    |      |     |     |     |                |        |      |      |
| ATOM | 6017 | CD2 | LEU | 165 | 15.191-122.469 | 14.194 | 1.00 | 0.00 |
| C    |      |     |     |     |                |        |      |      |
| ATOM | 6018 | C   | LEU | 165 | 19.700-122.955 | 15.144 | 1.00 | 0.00 |
| C    |      |     |     |     |                |        |      |      |
| ATOM | 6019 | O   | LEU | 165 | 20.505-123.864 | 15.531 | 1.00 | 0.00 |
| O    |      |     |     |     |                |        |      |      |
| ATOM | 6020 | N   | GLU | 166 | 19.659-121.715 | 15.689 | 1.00 | 0.00 |
| N    |      |     |     |     |                |        |      |      |
| ATOM | 6021 | CA  | GLU | 166 | 20.598-121.187 | 16.684 | 1.00 | 0.00 |
| C    |      |     |     |     |                |        |      |      |
| ATOM | 6022 | CB  | GLU | 166 | 21.860-120.487 | 16.006 | 1.00 | 0.00 |
| C    |      |     |     |     |                |        |      |      |
| ATOM | 6023 | CG  | GLU | 166 | 23.062-121.316 | 15.555 | 1.00 | 0.00 |
| C    |      |     |     |     |                |        |      |      |
| ATOM | 6024 | CD  | GLU | 166 | 23.649-122.205 | 16.635 | 1.00 | 0.00 |
| C    |      |     |     |     |                |        |      |      |
| ATOM | 6025 | OE1 | GLU | 166 | 24.424-123.122 | 16.251 | 1.00 | 0.00 |
| O    |      |     |     |     |                |        |      |      |
| ATOM | 6026 | OE2 | GLU | 166 | 23.541-121.922 | 17.813 | 1.00 | 0.00 |
| O1-  |      |     |     |     |                |        |      |      |
| ATOM | 6027 | C   | GLU | 166 | 19.866-120.126 | 17.595 | 1.00 | 0.00 |
| C    |      |     |     |     |                |        |      |      |
| ATOM | 6028 | O   | GLU | 166 | 19.069-119.341 | 17.015 | 1.00 | 0.00 |
| O    |      |     |     |     |                |        |      |      |
| ATOM | 6029 | N   | THR | 167 | 20.153-119.996 | 18.877 | 1.00 | 0.00 |
| N    |      |     |     |     |                |        |      |      |
| ATOM | 6030 | CA  | THR | 167 | 19.590-119.050 | 19.827 | 1.00 | 0.00 |
| C    |      |     |     |     |                |        |      |      |
| ATOM | 6031 | CB  | THR | 167 | 19.391-119.751 | 21.221 | 1.00 | 0.00 |
| C    |      |     |     |     |                |        |      |      |
| ATOM | 6032 | CG2 | THR | 167 | 18.673-121.109 | 20.878 | 1.00 | 0.00 |
| C    |      |     |     |     |                |        |      |      |
| ATOM | 6033 | OG1 | THR | 167 | 20.621-119.930 | 21.812 | 1.00 | 0.00 |
| O    |      |     |     |     |                |        |      |      |
| ATOM | 6034 | C   | THR | 167 | 20.356-117.680 | 19.962 | 1.00 | 0.00 |
| C    |      |     |     |     |                |        |      |      |
| ATOM | 6035 | O   | THR | 167 | 21.560-117.529 | 19.697 | 1.00 | 0.00 |
| O    |      |     |     |     |                |        |      |      |
| ATOM | 6036 | N   | PHE | 168 | 19.651-116.628 | 20.373 | 1.00 | 0.00 |
| N    |      |     |     |     |                |        |      |      |
| ATOM | 6037 | CA  | PHE | 168 | 20.084-115.205 | 20.440 | 1.00 | 0.00 |
| C    |      |     |     |     |                |        |      |      |
| ATOM | 6038 | CB  | PHE | 168 | 18.828-114.299 | 20.666 | 1.00 | 0.00 |
| C    |      |     |     |     |                |        |      |      |

|      |      |     |     |     |                |        |      |      |
|------|------|-----|-----|-----|----------------|--------|------|------|
| ATOM | 6039 | CG  | PHE | 168 | 19.074-112.801 | 20.570 | 1.00 | 0.00 |
| C    |      |     |     |     |                |        |      |      |
| ATOM | 6040 | CD1 | PHE | 168 | 19.351-111.986 | 21.705 | 1.00 | 0.00 |
| C    |      |     |     |     |                |        |      |      |
| ATOM | 6041 | CE1 | PHE | 168 | 19.495-110.612 | 21.603 | 1.00 | 0.00 |
| C    |      |     |     |     |                |        |      |      |
| ATOM | 6042 | CZ  | PHE | 168 | 19.319-109.971 | 20.407 | 1.00 | 0.00 |
| C    |      |     |     |     |                |        |      |      |
| ATOM | 6043 | CE2 | PHE | 168 | 19.097-110.746 | 19.256 | 1.00 | 0.00 |
| C    |      |     |     |     |                |        |      |      |
| ATOM | 6044 | CD2 | PHE | 168 | 18.962-112.168 | 19.295 | 1.00 | 0.00 |
| C    |      |     |     |     |                |        |      |      |
| ATOM | 6045 | C   | PHE | 168 | 21.293-114.836 | 21.241 | 1.00 | 0.00 |
| C    |      |     |     |     |                |        |      |      |
| ATOM | 6046 | O   | PHE | 168 | 22.018-113.870 | 20.983 | 1.00 | 0.00 |
| O    |      |     |     |     |                |        |      |      |
| ATOM | 6047 | N   | LYS | 169 | 21.603-115.609 | 22.295 | 1.00 | 0.00 |
| N    |      |     |     |     |                |        |      |      |
| ATOM | 6048 | CA  | LYS | 169 | 22.745-115.498 | 23.162 | 1.00 | 0.00 |
| C    |      |     |     |     |                |        |      |      |
| ATOM | 6049 | CB  | LYS | 169 | 22.393-116.067 | 24.504 | 1.00 | 0.00 |
| C    |      |     |     |     |                |        |      |      |
| ATOM | 6050 | CG  | LYS | 169 | 23.569-115.933 | 25.460 | 1.00 | 0.00 |
| C    |      |     |     |     |                |        |      |      |
| ATOM | 6051 | CD  | LYS | 169 | 24.039-114.588 | 25.900 | 1.00 | 0.00 |
| C    |      |     |     |     |                |        |      |      |
| ATOM | 6052 | CE  | LYS | 169 | 25.285-114.727 | 26.748 | 1.00 | 0.00 |
| C    |      |     |     |     |                |        |      |      |
| ATOM | 6053 | NZ  | LYS | 169 | 25.829-113.391 | 27.200 | 1.00 | 0.00 |
| N1+  |      |     |     |     |                |        |      |      |
| ATOM | 6054 | C   | LYS | 169 | 23.975-116.204 | 22.526 | 1.00 | 0.00 |
| C    |      |     |     |     |                |        |      |      |
| ATOM | 6055 | O   | LYS | 169 | 24.998-115.564 | 22.461 | 1.00 | 0.00 |
| O    |      |     |     |     |                |        |      |      |
| ATOM | 6056 | N   | ASP | 170 | 23.921-117.415 | 21.984 | 1.00 | 0.00 |
| N    |      |     |     |     |                |        |      |      |
| ATOM | 6057 | CA  | ASP | 170 | 25.077-117.975 | 21.259 | 1.00 | 0.00 |
| C    |      |     |     |     |                |        |      |      |
| ATOM | 6058 | CB  | ASP | 170 | 24.780-119.445 | 20.924 | 1.00 | 0.00 |
| C    |      |     |     |     |                |        |      |      |
| ATOM | 6059 | CG  | ASP | 170 | 24.552-120.401 | 22.107 | 1.00 | 0.00 |
| C    |      |     |     |     |                |        |      |      |
| ATOM | 6060 | OD1 | ASP | 170 | 23.595-121.190 | 22.122 | 1.00 | 0.00 |
| O    |      |     |     |     |                |        |      |      |
| ATOM | 6061 | OD2 | ASP | 170 | 25.360-120.315 | 23.083 | 1.00 | 0.00 |
| O1-  |      |     |     |     |                |        |      |      |
| ATOM | 6062 | C   | ASP | 170 | 25.330-117.177 | 19.888 | 1.00 | 0.00 |
| C    |      |     |     |     |                |        |      |      |
| ATOM | 6063 | O   | ASP | 170 | 26.476-116.918 | 19.505 | 1.00 | 0.00 |
| O    |      |     |     |     |                |        |      |      |
| ATOM | 6064 | N   | PHE | 171 | 24.326-116.661 | 19.158 | 1.00 | 0.00 |
| N    |      |     |     |     |                |        |      |      |
| ATOM | 6065 | CA  | PHE | 171 | 24.546-115.943 | 17.881 | 1.00 | 0.00 |
| C    |      |     |     |     |                |        |      |      |

|      |      |     |     |     |                |        |      |      |
|------|------|-----|-----|-----|----------------|--------|------|------|
| ATOM | 6066 | CB  | PHE | 171 | 24.648-116.975 | 16.719 | 1.00 | 0.00 |
| C    |      |     |     |     |                |        |      |      |
| ATOM | 6067 | CG  | PHE | 171 | 25.873-117.975 | 16.782 | 1.00 | 0.00 |
| C    |      |     |     |     |                |        |      |      |
| ATOM | 6068 | CD1 | PHE | 171 | 27.127-117.454 | 16.568 | 1.00 | 0.00 |
| C    |      |     |     |     |                |        |      |      |
| ATOM | 6069 | CE1 | PHE | 171 | 28.261-118.358 | 16.762 | 1.00 | 0.00 |
| C    |      |     |     |     |                |        |      |      |
| ATOM | 6070 | CZ  | PHE | 171 | 28.041-119.706 | 17.074 | 1.00 | 0.00 |
| C    |      |     |     |     |                |        |      |      |
| ATOM | 6071 | CE2 | PHE | 171 | 26.702-120.201 | 17.257 | 1.00 | 0.00 |
| C    |      |     |     |     |                |        |      |      |
| ATOM | 6072 | CD2 | PHE | 171 | 25.628-119.325 | 17.106 | 1.00 | 0.00 |
| C    |      |     |     |     |                |        |      |      |
| ATOM | 6073 | C   | PHE | 171 | 23.429-114.928 | 17.610 | 1.00 | 0.00 |
| C    |      |     |     |     |                |        |      |      |
| ATOM | 6074 | O   | PHE | 171 | 22.449-115.358 | 16.982 | 1.00 | 0.00 |
| O    |      |     |     |     |                |        |      |      |
| ATOM | 6075 | N   | PRO | 172 | 23.415-113.656 | 18.052 | 1.00 | 0.00 |
| N    |      |     |     |     |                |        |      |      |
| ATOM | 6076 | CD  | PRO | 172 | 24.499-112.935 | 18.684 | 1.00 | 0.00 |
| C    |      |     |     |     |                |        |      |      |
| ATOM | 6077 | CG  | PRO | 172 | 24.067-111.440 | 18.569 | 1.00 | 0.00 |
| C    |      |     |     |     |                |        |      |      |
| ATOM | 6078 | CB  | PRO | 172 | 22.635-111.438 | 18.621 | 1.00 | 0.00 |
| C    |      |     |     |     |                |        |      |      |
| ATOM | 6079 | CA  | PRO | 172 | 22.238-112.747 | 17.886 | 1.00 | 0.00 |
| C    |      |     |     |     |                |        |      |      |
| ATOM | 6080 | C   | PRO | 172 | 21.783-112.615 | 16.407 | 1.00 | 0.00 |
| C    |      |     |     |     |                |        |      |      |
| ATOM | 6081 | O   | PRO | 172 | 20.627-112.417 | 16.130 | 1.00 | 0.00 |
| O    |      |     |     |     |                |        |      |      |
| ATOM | 6082 | N   | GLN | 173 | 22.644-112.776 | 15.380 | 1.00 | 0.00 |
| N    |      |     |     |     |                |        |      |      |
| ATOM | 6083 | CA  | GLN | 173 | 22.249-112.659 | 13.945 | 1.00 | 0.00 |
| C    |      |     |     |     |                |        |      |      |
| ATOM | 6084 | CB  | GLN | 173 | 23.464-112.170 | 13.134 | 1.00 | 0.00 |
| C    |      |     |     |     |                |        |      |      |
| ATOM | 6085 | CG  | GLN | 173 | 24.458-113.149 | 12.578 | 1.00 | 0.00 |
| C    |      |     |     |     |                |        |      |      |
| ATOM | 6086 | CD  | GLN | 173 | 25.472-113.660 | 13.569 | 1.00 | 0.00 |
| C    |      |     |     |     |                |        |      |      |
| ATOM | 6087 | OE1 | GLN | 173 | 25.178-113.718 | 14.748 | 1.00 | 0.00 |
| O    |      |     |     |     |                |        |      |      |
| ATOM | 6088 | NE2 | GLN | 173 | 26.515-114.203 | 13.087 | 1.00 | 0.00 |
| N    |      |     |     |     |                |        |      |      |
| ATOM | 6089 | C   | GLN | 173 | 21.596-113.905 | 13.275 | 1.00 | 0.00 |
| C    |      |     |     |     |                |        |      |      |
| ATOM | 6090 | O   | GLN | 173 | 21.117-113.806 | 12.160 | 1.00 | 0.00 |
| O    |      |     |     |     |                |        |      |      |
| ATOM | 6091 | N   | MET | 174 | 21.510-114.994 | 14.028 | 1.00 | 0.00 |
| N    |      |     |     |     |                |        |      |      |
| ATOM | 6092 | CA  | MET | 174 | 20.811-116.229 | 13.698 | 1.00 | 0.00 |
| C    |      |     |     |     |                |        |      |      |

|      |      |     |     |     |                |        |      |      |
|------|------|-----|-----|-----|----------------|--------|------|------|
| ATOM | 6093 | CB  | MET | 174 | 21.719-117.496 | 13.724 | 1.00 | 0.00 |
| C    |      |     |     |     |                |        |      |      |
| ATOM | 6094 | CG  | MET | 174 | 22.632-117.485 | 12.527 | 1.00 | 0.00 |
| C    |      |     |     |     |                |        |      |      |
| ATOM | 6095 | SD  | MET | 174 | 23.840-118.787 | 12.678 | 1.00 | 0.00 |
| S    |      |     |     |     |                |        |      |      |
| ATOM | 6096 | CE  | MET | 174 | 23.048-120.099 | 11.729 | 1.00 | 0.00 |
| C    |      |     |     |     |                |        |      |      |
| ATOM | 6097 | C   | MET | 174 | 19.640-116.508 | 14.660 | 1.00 | 0.00 |
| C    |      |     |     |     |                |        |      |      |
| ATOM | 6098 | O   | MET | 174 | 18.656-117.177 | 14.308 | 1.00 | 0.00 |
| O    |      |     |     |     |                |        |      |      |
| ATOM | 6099 | N   | GLY | 175 | 19.771-116.065 | 15.897 | 1.00 | 0.00 |
| N    |      |     |     |     |                |        |      |      |
| ATOM | 6100 | CA  | GLY | 175 | 18.673-116.130 | 16.855 | 1.00 | 0.00 |
| C    |      |     |     |     |                |        |      |      |
| ATOM | 6101 | C   | GLY | 175 | 17.624-115.074 | 16.600 | 1.00 | 0.00 |
| C    |      |     |     |     |                |        |      |      |
| ATOM | 6102 | O   | GLY | 175 | 16.495-115.381 | 17.005 | 1.00 | 0.00 |
| O    |      |     |     |     |                |        |      |      |
| ATOM | 6103 | N   | ARG | 176 | 17.879-113.964 | 15.892 | 1.00 | 0.00 |
| N    |      |     |     |     |                |        |      |      |
| ATOM | 6104 | CA  | ARG | 176 | 16.809-113.127 | 15.373 | 1.00 | 0.00 |
| C    |      |     |     |     |                |        |      |      |
| ATOM | 6105 | CB  | ARG | 176 | 17.317-111.842 | 14.782 | 1.00 | 0.00 |
| C    |      |     |     |     |                |        |      |      |
| ATOM | 6106 | CG  | ARG | 176 | 18.348-112.001 | 13.639 | 1.00 | 0.00 |
| C    |      |     |     |     |                |        |      |      |
| ATOM | 6107 | CD  | ARG | 176 | 19.187-110.759 | 13.354 | 1.00 | 0.00 |
| C    |      |     |     |     |                |        |      |      |
| ATOM | 6108 | NE  | ARG | 176 | 18.294-109.619 | 12.903 | 1.00 | 0.00 |
| N    |      |     |     |     |                |        |      |      |
| ATOM | 6109 | CZ  | ARG | 176 | 18.769-108.366 | 12.663 | 1.00 | 0.00 |
| C    |      |     |     |     |                |        |      |      |
| ATOM | 6110 | NH1 | ARG | 176 | 18.062-107.458 | 12.040 | 1.00 | 0.00 |
| N    |      |     |     |     |                |        |      |      |
| ATOM | 6111 | NH2 | ARG | 176 | 19.954-108.045 | 12.909 | 1.00 | 0.00 |
| N1+  |      |     |     |     |                |        |      |      |
| ATOM | 6112 | C   | ARG | 176 | 16.013-113.820 | 14.217 | 1.00 | 0.00 |
| C    |      |     |     |     |                |        |      |      |
| ATOM | 6113 | O   | ARG | 176 | 16.546-114.572 | 13.373 | 1.00 | 0.00 |
| O    |      |     |     |     |                |        |      |      |
| ATOM | 6114 | N   | PHE | 177 | 14.702-113.593 | 14.142 | 1.00 | 0.00 |
| N    |      |     |     |     |                |        |      |      |
| ATOM | 6115 | CA  | PHE | 177 | 13.918-113.968 | 12.959 | 1.00 | 0.00 |
| C    |      |     |     |     |                |        |      |      |
| ATOM | 6116 | CB  | PHE | 177 | 13.361-115.338 | 13.286 | 1.00 | 0.00 |
| C    |      |     |     |     |                |        |      |      |
| ATOM | 6117 | CG  | PHE | 177 | 12.428-115.448 | 14.528 | 1.00 | 0.00 |
| C    |      |     |     |     |                |        |      |      |
| ATOM | 6118 | CD1 | PHE | 177 | 11.066-115.282 | 14.327 | 1.00 | 0.00 |
| C    |      |     |     |     |                |        |      |      |
| ATOM | 6119 | CE1 | PHE | 177 | 10.194-115.424 | 15.395 | 1.00 | 0.00 |
| C    |      |     |     |     |                |        |      |      |

|      |      |     |     |     |                |        |      |      |
|------|------|-----|-----|-----|----------------|--------|------|------|
| ATOM | 6120 | CZ  | PHE | 177 | 10.694-115.758 | 16.654 | 1.00 | 0.00 |
| C    |      |     |     |     |                |        |      |      |
| ATOM | 6121 | CE2 | PHE | 177 | 12.055-115.852 | 16.854 | 1.00 | 0.00 |
| C    |      |     |     |     |                |        |      |      |
| ATOM | 6122 | CD2 | PHE | 177 | 12.956-115.672 | 15.803 | 1.00 | 0.00 |
| C    |      |     |     |     |                |        |      |      |
| ATOM | 6123 | C   | PHE | 177 | 12.831-112.919 | 12.666 | 1.00 | 0.00 |
| C    |      |     |     |     |                |        |      |      |
| ATOM | 6124 | O   | PHE | 177 | 12.715-111.951 | 13.437 | 1.00 | 0.00 |
| O    |      |     |     |     |                |        |      |      |
| ATOM | 6125 | N   | THR | 178 | 12.113-113.084 | 11.562 | 1.00 | 0.00 |
| N    |      |     |     |     |                |        |      |      |
| ATOM | 6126 | CA  | THR | 178 | 11.038-112.183 | 11.143 | 1.00 | 0.00 |
| C    |      |     |     |     |                |        |      |      |
| ATOM | 6127 | CB  | THR | 178 | 11.330-111.286 | 9.900  | 1.00 | 0.00 |
| C    |      |     |     |     |                |        |      |      |
| ATOM | 6128 | CG2 | THR | 178 | 10.206-110.279 | 9.726  | 1.00 | 0.00 |
| C    |      |     |     |     |                |        |      |      |
| ATOM | 6129 | OG1 | THR | 178 | 12.462-110.476 | 10.127 | 1.00 | 0.00 |
| O    |      |     |     |     |                |        |      |      |
| ATOM | 6130 | C   | THR | 178 | 9.843-113.092  | 10.889 | 1.00 | 0.00 |
| C    |      |     |     |     |                |        |      |      |
| ATOM | 6131 | O   | THR | 178 | 10.031-114.213 | 10.386 | 1.00 | 0.00 |
| O    |      |     |     |     |                |        |      |      |
| ATOM | 6132 | N   | LEU | 179 | 8.562-112.622  | 11.196 | 1.00 | 0.00 |
| N    |      |     |     |     |                |        |      |      |
| ATOM | 6133 | CA  | LEU | 179 | 7.255-113.267  | 10.923 | 1.00 | 0.00 |
| C    |      |     |     |     |                |        |      |      |
| ATOM | 6134 | CB  | LEU | 179 | 6.501-113.514  | 12.266 | 1.00 | 0.00 |
| C    |      |     |     |     |                |        |      |      |
| ATOM | 6135 | CG  | LEU | 179 | 7.121-114.494  | 13.323 | 1.00 | 0.00 |
| C    |      |     |     |     |                |        |      |      |
| ATOM | 6136 | CD1 | LEU | 179 | 6.421-114.362  | 14.713 | 1.00 | 0.00 |
| C    |      |     |     |     |                |        |      |      |
| ATOM | 6137 | CD2 | LEU | 179 | 7.138-115.977  | 12.880 | 1.00 | 0.00 |
| C    |      |     |     |     |                |        |      |      |
| ATOM | 6138 | C   | LEU | 179 | 6.557-112.429  | 9.871  | 1.00 | 0.00 |
| C    |      |     |     |     |                |        |      |      |
| ATOM | 6139 | O   | LEU | 179 | 6.595-111.206  | 9.949  | 1.00 | 0.00 |
| O    |      |     |     |     |                |        |      |      |
| ATOM | 6140 | N   | ARG | 180 | 5.976-113.108  | 8.861  | 1.00 | 0.00 |
| N    |      |     |     |     |                |        |      |      |
| ATOM | 6141 | CA  | ARG | 180 | 5.395-112.489  | 7.703  | 1.00 | 0.00 |
| C    |      |     |     |     |                |        |      |      |
| ATOM | 6142 | CB  | ARG | 180 | 6.471-112.515  | 6.540  | 1.00 | 0.00 |
| C    |      |     |     |     |                |        |      |      |
| ATOM | 6143 | CG  | ARG | 180 | 5.898-112.435  | 5.087  | 1.00 | 0.00 |
| C    |      |     |     |     |                |        |      |      |
| ATOM | 6144 | CD  | ARG | 180 | 7.018-111.911  | 4.224  | 1.00 | 0.00 |
| C    |      |     |     |     |                |        |      |      |
| ATOM | 6145 | NE  | ARG | 180 | 7.945-112.973  | 4.103  | 1.00 | 0.00 |
| N    |      |     |     |     |                |        |      |      |
| ATOM | 6146 | CZ  | ARG | 180 | 9.223-113.091  | 4.420  | 1.00 | 0.00 |
| C    |      |     |     |     |                |        |      |      |

|      |      |     |     |     |                |       |      |      |
|------|------|-----|-----|-----|----------------|-------|------|------|
| ATOM | 6147 | NH1 | ARG | 180 | 9.786-112.263  | 5.269 | 1.00 | 0.00 |
| N    |      |     |     |     |                |       |      |      |
| ATOM | 6148 | NH2 | ARG | 180 | 9.868-114.213  | 3.983 | 1.00 | 0.00 |
| N1+  |      |     |     |     |                |       |      |      |
| ATOM | 6149 | C   | ARG | 180 | 4.090-113.117  | 7.324 | 1.00 | 0.00 |
| C    |      |     |     |     |                |       |      |      |
| ATOM | 6150 | O   | ARG | 180 | 3.896-114.328  | 7.490 | 1.00 | 0.00 |
| O    |      |     |     |     |                |       |      |      |
| ATOM | 6151 | N   | ASP | 181 | 3.055-112.337  | 6.897 | 1.00 | 0.00 |
| N    |      |     |     |     |                |       |      |      |
| ATOM | 6152 | CA  | ASP | 181 | 1.838-112.856  | 6.338 | 1.00 | 0.00 |
| C    |      |     |     |     |                |       |      |      |
| ATOM | 6153 | CB  | ASP | 181 | 0.880-113.279  | 7.495 | 1.00 | 0.00 |
| C    |      |     |     |     |                |       |      |      |
| ATOM | 6154 | CG  | ASP | 181 | -0.391-113.952 | 7.040 | 1.00 | 0.00 |
| C    |      |     |     |     |                |       |      |      |
| ATOM | 6155 | OD1 | ASP | 181 | -1.423-113.911 | 7.744 | 1.00 | 0.00 |
| O    |      |     |     |     |                |       |      |      |
| ATOM | 6156 | OD2 | ASP | 181 | -0.369-114.538 | 5.939 | 1.00 | 0.00 |
| O1-  |      |     |     |     |                |       |      |      |
| ATOM | 6157 | C   | ASP | 181 | 1.227-111.830  | 5.378 | 1.00 | 0.00 |
| C    |      |     |     |     |                |       |      |      |
| ATOM | 6158 | O   | ASP | 181 | 1.533-110.596  | 5.422 | 1.00 | 0.00 |
| O    |      |     |     |     |                |       |      |      |
| ATOM | 6159 | N   | GLU | 182 | 0.463-112.327  | 4.451 | 1.00 | 0.00 |
| N    |      |     |     |     |                |       |      |      |
| ATOM | 6160 | CA  | GLU | 182 | -0.070-111.546 | 3.366 | 1.00 | 0.00 |
| C    |      |     |     |     |                |       |      |      |
| ATOM | 6161 | CB  | GLU | 182 | -1.284-110.692 | 3.824 | 1.00 | 0.00 |
| C    |      |     |     |     |                |       |      |      |
| ATOM | 6162 | CG  | GLU | 182 | -2.336-111.592 | 4.628 | 1.00 | 0.00 |
| C    |      |     |     |     |                |       |      |      |
| ATOM | 6163 | CD  | GLU | 182 | -3.771-111.164 | 4.440 | 1.00 | 0.00 |
| C    |      |     |     |     |                |       |      |      |
| ATOM | 6164 | OE1 | GLU | 182 | -4.512-110.959 | 5.445 | 1.00 | 0.00 |
| O    |      |     |     |     |                |       |      |      |
| ATOM | 6165 | OE2 | GLU | 182 | -4.223-111.008 | 3.263 | 1.00 | 0.00 |
| O1-  |      |     |     |     |                |       |      |      |
| ATOM | 6166 | C   | GLU | 182 | 0.931-110.869  | 2.504 | 1.00 | 0.00 |
| C    |      |     |     |     |                |       |      |      |
| ATOM | 6167 | O   | GLU | 182 | 0.633-109.829  | 1.959 | 1.00 | 0.00 |
| O    |      |     |     |     |                |       |      |      |
| ATOM | 6168 | N   | GLY | 183 | 2.166-111.425  | 2.360 | 1.00 | 0.00 |
| N    |      |     |     |     |                |       |      |      |
| ATOM | 6169 | CA  | GLY | 183 | 3.214-110.759  | 1.589 | 1.00 | 0.00 |
| C    |      |     |     |     |                |       |      |      |
| ATOM | 6170 | C   | GLY | 183 | 4.072-109.691  | 2.337 | 1.00 | 0.00 |
| C    |      |     |     |     |                |       |      |      |
| ATOM | 6171 | O   | GLY | 183 | 4.897-109.057  | 1.786 | 1.00 | 0.00 |
| O    |      |     |     |     |                |       |      |      |
| ATOM | 6172 | N   | LYS | 184 | 3.721-109.442  | 3.582 | 1.00 | 0.00 |
| N    |      |     |     |     |                |       |      |      |
| ATOM | 6173 | CA  | LYS | 184 | 4.320-108.347  | 4.414 | 1.00 | 0.00 |
| C    |      |     |     |     |                |       |      |      |



|      |      |     |     |     |                |        |      |      |
|------|------|-----|-----|-----|----------------|--------|------|------|
| ATOM | 6174 | CB  | LYS | 184 | 3.284-107.142  | 4.420  | 1.00 | 0.00 |
| C    |      |     |     |     |                |        |      |      |
| ATOM | 6175 | CG  | LYS | 184 | 3.151-106.395  | 3.092  | 1.00 | 0.00 |
| C    |      |     |     |     |                |        |      |      |
| ATOM | 6176 | CD  | LYS | 184 | 4.346-105.478  | 2.742  | 1.00 | 0.00 |
| C    |      |     |     |     |                |        |      |      |
| ATOM | 6177 | CE  | LYS | 184 | 3.946-105.046  | 1.368  | 1.00 | 0.00 |
| C    |      |     |     |     |                |        |      |      |
| ATOM | 6178 | NZ  | LYS | 184 | 4.898-104.049  | 0.864  | 1.00 | 0.00 |
| N1+  |      |     |     |     |                |        |      |      |
| ATOM | 6179 | C   | LYS | 184 | 4.731-108.728  | 5.831  | 1.00 | 0.00 |
| C    |      |     |     |     |                |        |      |      |
| ATOM | 6180 | O   | LYS | 184 | 4.175-109.665  | 6.390  | 1.00 | 0.00 |
| O    |      |     |     |     |                |        |      |      |
| ATOM | 6181 | N   | THR | 185 | 5.733-108.051  | 6.424  | 1.00 | 0.00 |
| N    |      |     |     |     |                |        |      |      |
| ATOM | 6182 | CA  | THR | 185 | 6.126-108.294  | 7.789  | 1.00 | 0.00 |
| C    |      |     |     |     |                |        |      |      |
| ATOM | 6183 | CB  | THR | 185 | 7.294-107.463  | 8.286  | 1.00 | 0.00 |
| C    |      |     |     |     |                |        |      |      |
| ATOM | 6184 | CG2 | THR | 185 | 7.878-107.940  | 9.625  | 1.00 | 0.00 |
| C    |      |     |     |     |                |        |      |      |
| ATOM | 6185 | OG1 | THR | 185 | 8.300-107.543  | 7.315  | 1.00 | 0.00 |
| O    |      |     |     |     |                |        |      |      |
| ATOM | 6186 | C   | THR | 185 | 4.963-107.899  | 8.744  | 1.00 | 0.00 |
| C    |      |     |     |     |                |        |      |      |
| ATOM | 6187 | O   | THR | 185 | 4.448-106.808  | 8.714  | 1.00 | 0.00 |
| O    |      |     |     |     |                |        |      |      |
| ATOM | 6188 | N   | ILE | 186 | 4.654-108.795  | 9.687  | 1.00 | 0.00 |
| N    |      |     |     |     |                |        |      |      |
| ATOM | 6189 | CA  | ILE | 186 | 3.645-108.682  | 10.775 | 1.00 | 0.00 |
| C    |      |     |     |     |                |        |      |      |
| ATOM | 6190 | CB  | ILE | 186 | 2.439-109.675  | 10.584 | 1.00 | 0.00 |
| C    |      |     |     |     |                |        |      |      |
| ATOM | 6191 | CG2 | ILE | 186 | 2.965-111.096  | 10.591 | 1.00 | 0.00 |
| C    |      |     |     |     |                |        |      |      |
| ATOM | 6192 | CG1 | ILE | 186 | 1.223-109.468  | 11.552 | 1.00 | 0.00 |
| C    |      |     |     |     |                |        |      |      |
| ATOM | 6193 | CD1 | ILE | 186 | -0.018-110.329 | 11.205 | 1.00 | 0.00 |
| C    |      |     |     |     |                |        |      |      |
| ATOM | 6194 | C   | ILE | 186 | 4.289-108.812  | 12.190 | 1.00 | 0.00 |
| C    |      |     |     |     |                |        |      |      |
| ATOM | 6195 | O   | ILE | 186 | 3.633-108.383  | 13.209 | 1.00 | 0.00 |
| O    |      |     |     |     |                |        |      |      |
| ATOM | 6196 | N   | ALA | 187 | 5.438-109.392  | 12.367 | 1.00 | 0.00 |
| N    |      |     |     |     |                |        |      |      |
| ATOM | 6197 | CA  | ALA | 187 | 6.241-109.330  | 13.617 | 1.00 | 0.00 |
| C    |      |     |     |     |                |        |      |      |
| ATOM | 6198 | CB  | ALA | 187 | 5.655-110.243  | 14.788 | 1.00 | 0.00 |
| C    |      |     |     |     |                |        |      |      |
| ATOM | 6199 | C   | ALA | 187 | 7.781-109.502  | 13.393 | 1.00 | 0.00 |
| C    |      |     |     |     |                |        |      |      |
| ATOM | 6200 | O   | ALA | 187 | 8.215-109.988  | 12.373 | 1.00 | 0.00 |
| O    |      |     |     |     |                |        |      |      |

|      |      |     |     |     |                |        |      |      |
|------|------|-----|-----|-----|----------------|--------|------|------|
| ATOM | 6201 | N   | ILE | 188 | 8.575-109.238  | 14.427 | 1.00 | 0.00 |
| N    |      |     |     |     |                |        |      |      |
| ATOM | 6202 | CA  | ILE | 188 | 9.989-109.736  | 14.518 | 1.00 | 0.00 |
| C    |      |     |     |     |                |        |      |      |
| ATOM | 6203 | CB  | ILE | 188 | 10.948-108.522 | 14.440 | 1.00 | 0.00 |
| C    |      |     |     |     |                |        |      |      |
| ATOM | 6204 | CG2 | ILE | 188 | 12.371-108.673 | 15.034 | 1.00 | 0.00 |
| C    |      |     |     |     |                |        |      |      |
| ATOM | 6205 | CG1 | ILE | 188 | 11.014-108.159 | 12.938 | 1.00 | 0.00 |
| C    |      |     |     |     |                |        |      |      |
| ATOM | 6206 | CD1 | ILE | 188 | 11.591-106.811 | 12.598 | 1.00 | 0.00 |
| C    |      |     |     |     |                |        |      |      |
| ATOM | 6207 | C   | ILE | 188 | 10.112-110.622 | 15.749 | 1.00 | 0.00 |
| C    |      |     |     |     |                |        |      |      |
| ATOM | 6208 | O   | ILE | 188 | 9.306-110.450  | 16.611 | 1.00 | 0.00 |
| O    |      |     |     |     |                |        |      |      |
| ATOM | 6209 | N   | GLY | 189 | 11.179-111.403 | 15.924 | 1.00 | 0.00 |
| N    |      |     |     |     |                |        |      |      |
| ATOM | 6210 | CA  | GLY | 189 | 11.619-111.743 | 17.277 | 1.00 | 0.00 |
| C    |      |     |     |     |                |        |      |      |
| ATOM | 6211 | C   | GLY | 189 | 13.119-112.248 | 17.437 | 1.00 | 0.00 |
| C    |      |     |     |     |                |        |      |      |
| ATOM | 6212 | O   | GLY | 189 | 13.893-112.077 | 16.515 | 1.00 | 0.00 |
| O    |      |     |     |     |                |        |      |      |
| ATOM | 6213 | N   | LYS | 190 | 13.310-112.932 | 18.570 | 1.00 | 0.00 |
| N    |      |     |     |     |                |        |      |      |
| ATOM | 6214 | CA  | LYS | 190 | 14.549-113.590 | 18.973 | 1.00 | 0.00 |
| C    |      |     |     |     |                |        |      |      |
| ATOM | 6215 | CB  | LYS | 190 | 15.540-112.692 | 19.626 | 1.00 | 0.00 |
| C    |      |     |     |     |                |        |      |      |
| ATOM | 6216 | CG  | LYS | 190 | 15.007-111.612 | 20.543 | 1.00 | 0.00 |
| C    |      |     |     |     |                |        |      |      |
| ATOM | 6217 | CD  | LYS | 190 | 16.038-110.977 | 21.415 | 1.00 | 0.00 |
| C    |      |     |     |     |                |        |      |      |
| ATOM | 6218 | CE  | LYS | 190 | 15.211-109.998 | 22.287 | 1.00 | 0.00 |
| C    |      |     |     |     |                |        |      |      |
| ATOM | 6219 | NZ  | LYS | 190 | 16.083-109.298 | 23.325 | 1.00 | 0.00 |
| N1+  |      |     |     |     |                |        |      |      |
| ATOM | 6220 | C   | LYS | 190 | 14.272-114.877 | 19.768 | 1.00 | 0.00 |
| C    |      |     |     |     |                |        |      |      |
| ATOM | 6221 | O   | LYS | 190 | 13.546-114.869 | 20.791 | 1.00 | 0.00 |
| O    |      |     |     |     |                |        |      |      |
| ATOM | 6222 | N   | VAL | 191 | 14.901-115.967 | 19.288 | 1.00 | 0.00 |
| N    |      |     |     |     |                |        |      |      |
| ATOM | 6223 | CA  | VAL | 191 | 14.777-117.329 | 19.845 | 1.00 | 0.00 |
| C    |      |     |     |     |                |        |      |      |
| ATOM | 6224 | CB  | VAL | 191 | 15.198-118.477 | 18.889 | 1.00 | 0.00 |
| C    |      |     |     |     |                |        |      |      |
| ATOM | 6225 | CG1 | VAL | 191 | 15.164-119.899 | 19.476 | 1.00 | 0.00 |
| C    |      |     |     |     |                |        |      |      |
| ATOM | 6226 | CG2 | VAL | 191 | 14.380-118.546 | 17.611 | 1.00 | 0.00 |
| C    |      |     |     |     |                |        |      |      |
| ATOM | 6227 | C   | VAL | 191 | 15.447-117.472 | 21.167 | 1.00 | 0.00 |
| C    |      |     |     |     |                |        |      |      |

|      |      |     |     |     |                |        |      |      |
|------|------|-----|-----|-----|----------------|--------|------|------|
| ATOM | 6228 | O   | VAL | 191 | 16.624-117.315 | 21.293 | 1.00 | 0.00 |
| O    |      |     |     |     |                |        |      |      |
| ATOM | 6229 | N   | LEU | 192 | 14.644-117.819 | 22.175 | 1.00 | 0.00 |
| N    |      |     |     |     |                |        |      |      |
| ATOM | 6230 | CA  | LEU | 192 | 15.006-118.084 | 23.578 | 1.00 | 0.00 |
| C    |      |     |     |     |                |        |      |      |
| ATOM | 6231 | CB  | LEU | 192 | 13.741-117.994 | 24.493 | 1.00 | 0.00 |
| C    |      |     |     |     |                |        |      |      |
| ATOM | 6232 | CG  | LEU | 192 | 13.231-116.621 | 24.824 | 1.00 | 0.00 |
| C    |      |     |     |     |                |        |      |      |
| ATOM | 6233 | CD1 | LEU | 192 | 11.940-116.745 | 25.629 | 1.00 | 0.00 |
| C    |      |     |     |     |                |        |      |      |
| ATOM | 6234 | CD2 | LEU | 192 | 14.174-115.711 | 25.661 | 1.00 | 0.00 |
| C    |      |     |     |     |                |        |      |      |
| ATOM | 6235 | C   | LEU | 192 | 15.688-119.432 | 23.723 | 1.00 | 0.00 |
| C    |      |     |     |     |                |        |      |      |
| ATOM | 6236 | O   | LEU | 192 | 16.796-119.381 | 24.260 | 1.00 | 0.00 |
| O    |      |     |     |     |                |        |      |      |
| ATOM | 6237 | N   | LYS | 193 | 14.987-120.496 | 23.307 | 1.00 | 0.00 |
| N    |      |     |     |     |                |        |      |      |
| ATOM | 6238 | CA  | LYS | 193 | 15.407-121.859 | 23.444 | 1.00 | 0.00 |
| C    |      |     |     |     |                |        |      |      |
| ATOM | 6239 | CB  | LYS | 193 | 15.371-122.448 | 24.902 | 1.00 | 0.00 |
| C    |      |     |     |     |                |        |      |      |
| ATOM | 6240 | CG  | LYS | 193 | 14.078-122.703 | 25.507 | 1.00 | 0.00 |
| C    |      |     |     |     |                |        |      |      |
| ATOM | 6241 | CD  | LYS | 193 | 14.334-123.328 | 26.889 | 1.00 | 0.00 |
| C    |      |     |     |     |                |        |      |      |
| ATOM | 6242 | CE  | LYS | 193 | 14.616-124.806 | 27.013 | 1.00 | 0.00 |
| C    |      |     |     |     |                |        |      |      |
| ATOM | 6243 | NZ  | LYS | 193 | 13.544-125.648 | 26.329 | 1.00 | 0.00 |
| N1+  |      |     |     |     |                |        |      |      |
| ATOM | 6244 | C   | LYS | 193 | 14.538-122.753 | 22.548 | 1.00 | 0.00 |
| C    |      |     |     |     |                |        |      |      |
| ATOM | 6245 | O   | LYS | 193 | 13.458-122.367 | 22.162 | 1.00 | 0.00 |
| O    |      |     |     |     |                |        |      |      |
| ATOM | 6246 | N   | LEU | 194 | 14.964-123.986 | 22.230 | 1.00 | 0.00 |
| N    |      |     |     |     |                |        |      |      |
| ATOM | 6247 | CA  | LEU | 194 | 14.165-125.018 | 21.545 | 1.00 | 0.00 |
| C    |      |     |     |     |                |        |      |      |
| ATOM | 6248 | CB  | LEU | 194 | 15.100-125.879 | 20.669 | 1.00 | 0.00 |
| C    |      |     |     |     |                |        |      |      |
| ATOM | 6249 | CG  | LEU | 194 | 15.746-125.252 | 19.399 | 1.00 | 0.00 |
| C    |      |     |     |     |                |        |      |      |
| ATOM | 6250 | CD1 | LEU | 194 | 16.499-123.903 | 19.682 | 1.00 | 0.00 |
| C    |      |     |     |     |                |        |      |      |
| ATOM | 6251 | CD2 | LEU | 194 | 16.656-126.187 | 18.624 | 1.00 | 0.00 |
| C    |      |     |     |     |                |        |      |      |
| ATOM | 6252 | C   | LEU | 194 | 13.336-125.866 | 22.501 | 1.00 | 0.00 |
| C    |      |     |     |     |                |        |      |      |
| ATOM | 6253 | O   | LEU | 194 | 13.646-125.958 | 23.663 | 1.00 | 0.00 |
| O    |      |     |     |     |                |        |      |      |
| ATOM | 6254 | N   | VAL | 195 | 12.244-126.419 | 22.009 | 1.00 | 0.00 |
| N    |      |     |     |     |                |        |      |      |

|      |      |     |     |     |                |        |      |      |
|------|------|-----|-----|-----|----------------|--------|------|------|
| ATOM | 6255 | CA  | VAL | 195 | 11.339-127.265 | 22.734 | 1.00 | 0.00 |
| C    |      |     |     |     |                |        |      |      |
| ATOM | 6256 | CB  | VAL | 195 | 9.947-126.626  | 22.584 | 1.00 | 0.00 |
| C    |      |     |     |     |                |        |      |      |
| ATOM | 6257 | CG1 | VAL | 195 | 8.781-127.484  | 23.115 | 1.00 | 0.00 |
| C    |      |     |     |     |                |        |      |      |
| ATOM | 6258 | CG2 | VAL | 195 | 9.787-125.318  | 23.289 | 1.00 | 0.00 |
| C    |      |     |     |     |                |        |      |      |
| ATOM | 6259 | C   | VAL | 195 | 11.387-128.640 | 22.222 | 1.00 | 0.00 |
| C    |      |     |     |     |                |        |      |      |
| ATOM | 6260 | O   | VAL | 195 | 11.166-128.940 | 21.050 | 1.00 | 0.00 |
| O    |      |     |     |     |                |        |      |      |
| ATOM | 6261 | N   | PRO | 196 | 11.511-129.635 | 23.089 | 1.00 | 0.00 |
| N    |      |     |     |     |                |        |      |      |
| ATOM | 6262 | CD  | PRO | 196 | 10.980-130.986 | 22.763 | 1.00 | 0.00 |
| C    |      |     |     |     |                |        |      |      |
| ATOM | 6263 | CG  | PRO | 196 | 10.707-131.561 | 24.149 | 1.00 | 0.00 |
| C    |      |     |     |     |                |        |      |      |
| ATOM | 6264 | CB  | PRO | 196 | 11.801-130.971 | 25.080 | 1.00 | 0.00 |
| C    |      |     |     |     |                |        |      |      |
| ATOM | 6265 | CA  | PRO | 196 | 11.876-129.605 | 24.515 | 1.00 | 0.00 |
| C    |      |     |     |     |                |        |      |      |
| ATOM | 6266 | C   | PRO | 196 | 13.261-129.036 | 24.872 | 1.00 | 0.00 |
| C    |      |     |     |     |                |        |      |      |
| ATOM | 6267 | O   | PRO | 196 | 14.180-129.181 | 23.978 | 1.00 | 0.00 |
| O    |      |     |     |     |                |        |      |      |
| ATOM | 6268 | OXT | PRO | 196 | 13.522-128.601 | 26.044 | 1.00 | 0.00 |
| O1-  |      |     |     |     |                |        |      |      |
| ATOM | 6269 | CH3 | ACE | 197 | 29.888-111.250 | 43.384 | 1.00 | 0.00 |
| C    |      |     |     |     |                |        |      |      |
| ATOM | 6270 | C   | ACE | 197 | 29.312-109.969 | 42.816 | 1.00 | 0.00 |
| C    |      |     |     |     |                |        |      |      |
| ATOM | 6271 | O   | ACE | 197 | 28.675-109.993 | 41.748 | 1.00 | 0.00 |
| O    |      |     |     |     |                |        |      |      |
| ATOM | 6272 | N   | ASN | 198 | 29.616-108.851 | 43.495 | 1.00 | 0.00 |
| N    |      |     |     |     |                |        |      |      |
| ATOM | 6273 | CA  | ASN | 198 | 29.329-107.459 | 43.015 | 1.00 | 0.00 |
| C    |      |     |     |     |                |        |      |      |
| ATOM | 6274 | CB  | ASN | 198 | 29.394-106.453 | 44.189 | 1.00 | 0.00 |
| C    |      |     |     |     |                |        |      |      |
| ATOM | 6275 | CG  | ASN | 198 | 28.306-106.714 | 45.162 | 1.00 | 0.00 |
| C    |      |     |     |     |                |        |      |      |
| ATOM | 6276 | OD1 | ASN | 198 | 28.481-107.089 | 46.321 | 1.00 | 0.00 |
| O    |      |     |     |     |                |        |      |      |
| ATOM | 6277 | ND2 | ASN | 198 | 27.065-106.369 | 44.784 | 1.00 | 0.00 |
| N    |      |     |     |     |                |        |      |      |
| ATOM | 6278 | C   | ASN | 198 | 30.188-107.151 | 41.786 | 1.00 | 0.00 |
| C    |      |     |     |     |                |        |      |      |
| ATOM | 6279 | O   | ASN | 198 | 31.256-107.663 | 41.626 | 1.00 | 0.00 |
| O    |      |     |     |     |                |        |      |      |
| ATOM | 6280 | N   | PHE | 199 | 29.732-106.206 | 40.913 | 1.00 | 0.00 |
| N    |      |     |     |     |                |        |      |      |
| ATOM | 6281 | CA  | PHE | 199 | 30.484-105.733 | 39.795 | 1.00 | 0.00 |
| C    |      |     |     |     |                |        |      |      |

|      |      |     |     |     |                |        |      |      |
|------|------|-----|-----|-----|----------------|--------|------|------|
| ATOM | 6282 | CB  | PHE | 199 | 29.737-105.872 | 38.442 | 1.00 | 0.00 |
| C    |      |     |     |     |                |        |      |      |
| ATOM | 6283 | CG  | PHE | 199 | 29.229-107.252 | 37.944 | 1.00 | 0.00 |
| C    |      |     |     |     |                |        |      |      |
| ATOM | 6284 | CD1 | PHE | 199 | 28.157-107.927 | 38.502 | 1.00 | 0.00 |
| C    |      |     |     |     |                |        |      |      |
| ATOM | 6285 | CE1 | PHE | 199 | 27.799-109.214 | 38.120 | 1.00 | 0.00 |
| C    |      |     |     |     |                |        |      |      |
| ATOM | 6286 | CZ  | PHE | 199 | 28.460-109.832 | 37.090 | 1.00 | 0.00 |
| C    |      |     |     |     |                |        |      |      |
| ATOM | 6287 | CE2 | PHE | 199 | 29.535-109.175 | 36.491 | 1.00 | 0.00 |
| C    |      |     |     |     |                |        |      |      |
| ATOM | 6288 | CD2 | PHE | 199 | 29.963-107.906 | 36.919 | 1.00 | 0.00 |
| C    |      |     |     |     |                |        |      |      |
| ATOM | 6289 | C   | PHE | 199 | 30.825-104.246 | 39.969 | 1.00 | 0.00 |
| C    |      |     |     |     |                |        |      |      |
| ATOM | 6290 | O   | PHE | 199 | 30.252-103.641 | 40.844 | 1.00 | 0.00 |
| O    |      |     |     |     |                |        |      |      |
| ATOM | 6291 | N   | ASP | 200 | 31.753-103.623 | 39.227 | 1.00 | 0.00 |
| N    |      |     |     |     |                |        |      |      |
| ATOM | 6292 | CA  | ASP | 200 | 32.157-102.223 | 39.401 | 1.00 | 0.00 |
| C    |      |     |     |     |                |        |      |      |
| ATOM | 6293 | CB  | ASP | 200 | 33.237-101.998 | 38.272 | 1.00 | 0.00 |
| C    |      |     |     |     |                |        |      |      |
| ATOM | 6294 | CG  | ASP | 200 | 33.802-100.564 | 38.334 | 1.00 | 0.00 |
| C    |      |     |     |     |                |        |      |      |
| ATOM | 6295 | OD1 | ASP | 200 | 34.335-100.040 | 37.336 | 1.00 | 0.00 |
| O    |      |     |     |     |                |        |      |      |
| ATOM | 6296 | OD2 | ASP | 200 | 33.739-100.040 | 39.435 | 1.00 | 0.00 |
| O1-  |      |     |     |     |                |        |      |      |
| ATOM | 6297 | C   | ASP | 200 | 30.970-101.244 | 39.405 | 1.00 | 0.00 |
| C    |      |     |     |     |                |        |      |      |
| ATOM | 6298 | O   | ASP | 200 | 30.187-101.208 | 38.470 | 1.00 | 0.00 |
| O    |      |     |     |     |                |        |      |      |
| ATOM | 6299 | N   | THR | 201 | 30.948-100.376 | 40.377 | 1.00 | 0.00 |
| N    |      |     |     |     |                |        |      |      |
| ATOM | 6300 | CA  | THR | 201 | 29.956 -99.233 | 40.496 | 1.00 | 0.00 |
| C    |      |     |     |     |                |        |      |      |
| ATOM | 6301 | CB  | THR | 201 | 30.170 -98.545 | 41.791 | 1.00 | 0.00 |
| C    |      |     |     |     |                |        |      |      |
| ATOM | 6302 | CG2 | THR | 201 | 29.948 -99.537 | 42.943 | 1.00 | 0.00 |
| C    |      |     |     |     |                |        |      |      |
| ATOM | 6303 | OG1 | THR | 201 | 31.470 -98.056 | 41.957 | 1.00 | 0.00 |
| O    |      |     |     |     |                |        |      |      |
| ATOM | 6304 | C   | THR | 201 | 30.054 -98.101 | 39.463 | 1.00 | 0.00 |
| C    |      |     |     |     |                |        |      |      |
| ATOM | 6305 | O   | THR | 201 | 29.100 -97.236 | 39.298 | 1.00 | 0.00 |
| O    |      |     |     |     |                |        |      |      |
| ATOM | 6306 | N   | SER | 202 | 31.108 -98.061 | 38.644 | 1.00 | 0.00 |
| N    |      |     |     |     |                |        |      |      |
| ATOM | 6307 | CA  | SER | 202 | 31.285 -97.105 | 37.473 | 1.00 | 0.00 |
| C    |      |     |     |     |                |        |      |      |
| ATOM | 6308 | CB  | SER | 202 | 32.795 -97.028 | 37.078 | 1.00 | 0.00 |
| C    |      |     |     |     |                |        |      |      |

|      |      |     |     |     |        |          |        |      |      |
|------|------|-----|-----|-----|--------|----------|--------|------|------|
| ATOM | 6309 | OG  | SER | 202 | 33.134 | -98.068  | 36.243 | 1.00 | 0.00 |
| O    |      |     |     |     |        |          |        |      |      |
| ATOM | 6310 | C   | SER | 202 | 30.371 | -97.591  | 36.324 | 1.00 | 0.00 |
| C    |      |     |     |     |        |          |        |      |      |
| ATOM | 6311 | O   | SER | 202 | 30.021 | -96.840  | 35.424 | 1.00 | 0.00 |
| O    |      |     |     |     |        |          |        |      |      |
| ATOM | 6312 | N   | LEU | 203 | 29.893 | -98.839  | 36.355 | 1.00 | 0.00 |
| N    |      |     |     |     |        |          |        |      |      |
| ATOM | 6313 | CA  | LEU | 203 | 29.046 | -99.395  | 35.251 | 1.00 | 0.00 |
| C    |      |     |     |     |        |          |        |      |      |
| ATOM | 6314 | CB  | LEU | 203 | 28.957 | -100.964 | 35.404 | 1.00 | 0.00 |
| C    |      |     |     |     |        |          |        |      |      |
| ATOM | 6315 | CG  | LEU | 203 | 30.328 | -101.712 | 35.450 | 1.00 | 0.00 |
| C    |      |     |     |     |        |          |        |      |      |
| ATOM | 6316 | CD1 | LEU | 203 | 30.015 | -103.203 | 35.414 | 1.00 | 0.00 |
| C    |      |     |     |     |        |          |        |      |      |
| ATOM | 6317 | CD2 | LEU | 203 | 31.078 | -101.495 | 34.136 | 1.00 | 0.00 |
| C    |      |     |     |     |        |          |        |      |      |
| ATOM | 6318 | C   | LEU | 203 | 27.681 | -98.709  | 35.147 | 1.00 | 0.00 |
| C    |      |     |     |     |        |          |        |      |      |
| ATOM | 6319 | O   | LEU | 203 | 27.434 | -98.280  | 34.026 | 1.00 | 0.00 |
| O    |      |     |     |     |        |          |        |      |      |
| ATOM | 6320 | N   | PRO | 204 | 26.788 | -98.555  | 36.171 | 1.00 | 0.00 |
| N    |      |     |     |     |        |          |        |      |      |
| ATOM | 6321 | CD  | PRO | 204 | 26.902 | -99.103  | 37.489 | 1.00 | 0.00 |
| C    |      |     |     |     |        |          |        |      |      |
| ATOM | 6322 | CG  | PRO | 204 | 25.472 | -99.290  | 37.918 | 1.00 | 0.00 |
| C    |      |     |     |     |        |          |        |      |      |
| ATOM | 6323 | CB  | PRO | 204 | 24.741 | -98.115  | 37.266 | 1.00 | 0.00 |
| C    |      |     |     |     |        |          |        |      |      |
| ATOM | 6324 | CA  | PRO | 204 | 25.565 | -97.801  | 36.013 | 1.00 | 0.00 |
| C    |      |     |     |     |        |          |        |      |      |
| ATOM | 6325 | C   | PRO | 204 | 25.810 | -96.277  | 35.886 | 1.00 | 0.00 |
| C    |      |     |     |     |        |          |        |      |      |
| ATOM | 6326 | O   | PRO | 204 | 24.956 | -95.666  | 35.256 | 1.00 | 0.00 |
| O    |      |     |     |     |        |          |        |      |      |
| ATOM | 6327 | N   | THR | 205 | 26.996 | -95.689  | 36.190 | 1.00 | 0.00 |
| N    |      |     |     |     |        |          |        |      |      |
| ATOM | 6328 | CA  | THR | 205 | 27.276 | -94.228  | 35.889 | 1.00 | 0.00 |
| C    |      |     |     |     |        |          |        |      |      |
| ATOM | 6329 | CB  | THR | 205 | 28.399 | -93.586  | 36.750 | 1.00 | 0.00 |
| C    |      |     |     |     |        |          |        |      |      |
| ATOM | 6330 | CG2 | THR | 205 | 28.778 | -92.119  | 36.447 | 1.00 | 0.00 |
| C    |      |     |     |     |        |          |        |      |      |
| ATOM | 6331 | OG1 | THR | 205 | 27.959 | -93.569  | 38.139 | 1.00 | 0.00 |
| O    |      |     |     |     |        |          |        |      |      |
| ATOM | 6332 | C   | THR | 205 | 27.593 | -94.045  | 34.425 | 1.00 | 0.00 |
| C    |      |     |     |     |        |          |        |      |      |
| ATOM | 6333 | O   | THR | 205 | 27.245 | -92.999  | 33.878 | 1.00 | 0.00 |
| O    |      |     |     |     |        |          |        |      |      |
| ATOM | 6334 | N   | SER | 206 | 28.432 | -94.963  | 33.849 | 1.00 | 0.00 |
| N    |      |     |     |     |        |          |        |      |      |
| ATOM | 6335 | CA  | SER | 206 | 28.775 | -94.982  | 32.429 | 1.00 | 0.00 |
| C    |      |     |     |     |        |          |        |      |      |

|      |      |     |     |     |        |          |        |      |      |
|------|------|-----|-----|-----|--------|----------|--------|------|------|
| ATOM | 6336 | CB  | SER | 206 | 30.065 | -95.857  | 32.194 | 1.00 | 0.00 |
| C    |      |     |     |     |        |          |        |      |      |
| ATOM | 6337 | OG  | SER | 206 | 29.840 | -97.165  | 32.698 | 1.00 | 0.00 |
| O    |      |     |     |     |        |          |        |      |      |
| ATOM | 6338 | C   | SER | 206 | 27.607 | -95.484  | 31.502 | 1.00 | 0.00 |
| C    |      |     |     |     |        |          |        |      |      |
| ATOM | 6339 | O   | SER | 206 | 27.763 | -95.569  | 30.264 | 1.00 | 0.00 |
| O    |      |     |     |     |        |          |        |      |      |
| ATOM | 6340 | N   | HIE | 207 | 26.458 | -95.924  | 32.089 | 1.00 | 0.00 |
| N    |      |     |     |     |        |          |        |      |      |
| ATOM | 6341 | CA  | HIE | 207 | 25.359 | -96.621  | 31.368 | 1.00 | 0.00 |
| C    |      |     |     |     |        |          |        |      |      |
| ATOM | 6342 | CB  | HIE | 207 | 24.466 | -95.588  | 30.684 | 1.00 | 0.00 |
| C    |      |     |     |     |        |          |        |      |      |
| ATOM | 6343 | CG  | HIE | 207 | 23.887 | -94.602  | 31.555 | 1.00 | 0.00 |
| C    |      |     |     |     |        |          |        |      |      |
| ATOM | 6344 | ND1 | HIE | 207 | 23.087 | -94.847  | 32.724 | 1.00 | 0.00 |
| N    |      |     |     |     |        |          |        |      |      |
| ATOM | 6345 | CE1 | HIE | 207 | 22.917 | -93.649  | 33.296 | 1.00 | 0.00 |
| C    |      |     |     |     |        |          |        |      |      |
| ATOM | 6346 | NE2 | HIE | 207 | 23.565 | -92.672  | 32.598 | 1.00 | 0.00 |
| N    |      |     |     |     |        |          |        |      |      |
| ATOM | 6347 | CD2 | HIE | 207 | 24.150 | -93.273  | 31.508 | 1.00 | 0.00 |
| C    |      |     |     |     |        |          |        |      |      |
| ATOM | 6348 | C   | HIE | 207 | 25.760 | -97.840  | 30.640 | 1.00 | 0.00 |
| C    |      |     |     |     |        |          |        |      |      |
| ATOM | 6349 | O   | HIE | 207 | 25.324 | -97.936  | 29.474 | 1.00 | 0.00 |
| O    |      |     |     |     |        |          |        |      |      |
| ATOM | 6350 | N   | THR | 208 | 26.621 | -98.714  | 31.284 | 1.00 | 0.00 |
| N    |      |     |     |     |        |          |        |      |      |
| ATOM | 6351 | CA  | THR | 208 | 27.169 | -99.948  | 30.689 | 1.00 | 0.00 |
| C    |      |     |     |     |        |          |        |      |      |
| ATOM | 6352 | CB  | THR | 208 | 28.383 | -100.447 | 31.539 | 1.00 | 0.00 |
| C    |      |     |     |     |        |          |        |      |      |
| ATOM | 6353 | CG2 | THR | 208 | 28.907 | -101.829 | 31.000 | 1.00 | 0.00 |
| C    |      |     |     |     |        |          |        |      |      |
| ATOM | 6354 | OG1 | THR | 208 | 29.363 | -99.475  | 31.274 | 1.00 | 0.00 |
| O    |      |     |     |     |        |          |        |      |      |
| ATOM | 6355 | C   | THR | 208 | 26.088 | -100.955 | 30.456 | 1.00 | 0.00 |
| C    |      |     |     |     |        |          |        |      |      |
| ATOM | 6356 | O   | THR | 208 | 26.202 | -101.850 | 29.568 | 1.00 | 0.00 |
| O    |      |     |     |     |        |          |        |      |      |
| ATOM | 6357 | N   | TYR | 209 | 24.881 | -100.785 | 30.954 | 1.00 | 0.00 |
| N    |      |     |     |     |        |          |        |      |      |
| ATOM | 6358 | CA  | TYR | 209 | 23.762 | -101.569 | 30.503 | 1.00 | 0.00 |
| C    |      |     |     |     |        |          |        |      |      |
| ATOM | 6359 | CB  | TYR | 209 | 22.537 | -101.295 | 31.406 | 1.00 | 0.00 |
| C    |      |     |     |     |        |          |        |      |      |
| ATOM | 6360 | CG  | TYR | 209 | 22.094 | -99.851  | 31.440 | 1.00 | 0.00 |
| C    |      |     |     |     |        |          |        |      |      |
| ATOM | 6361 | CD1 | TYR | 209 | 22.465 | -99.034  | 32.515 | 1.00 | 0.00 |
| C    |      |     |     |     |        |          |        |      |      |
| ATOM | 6362 | CE1 | TYR | 209 | 21.899 | -97.724  | 32.609 | 1.00 | 0.00 |
| C    |      |     |     |     |        |          |        |      |      |

|      |      |     |     |     |        |          |        |      |      |
|------|------|-----|-----|-----|--------|----------|--------|------|------|
| ATOM | 6363 | CZ  | TYR | 209 | 20.923 | -97.254  | 31.717 | 1.00 | 0.00 |
| C    |      |     |     |     |        |          |        |      |      |
| ATOM | 6364 | OH  | TYR | 209 | 20.365 | -96.063  | 31.802 | 1.00 | 0.00 |
| O    |      |     |     |     |        |          |        |      |      |
| ATOM | 6365 | CE2 | TYR | 209 | 20.587 | -98.085  | 30.634 | 1.00 | 0.00 |
| C    |      |     |     |     |        |          |        |      |      |
| ATOM | 6366 | CD2 | TYR | 209 | 21.165 | -99.406  | 30.496 | 1.00 | 0.00 |
| C    |      |     |     |     |        |          |        |      |      |
| ATOM | 6367 | C   | TYR | 209 | 23.399 | -101.356 | 29.007 | 1.00 | 0.00 |
| C    |      |     |     |     |        |          |        |      |      |
| ATOM | 6368 | O   | TYR | 209 | 22.775 | -102.249 | 28.401 | 1.00 | 0.00 |
| O    |      |     |     |     |        |          |        |      |      |
| ATOM | 6369 | N   | LEU | 210 | 23.695 | -100.202 | 28.340 | 1.00 | 0.00 |
| N    |      |     |     |     |        |          |        |      |      |
| ATOM | 6370 | CA  | LEU | 210 | 23.498 | -100.059 | 26.883 | 1.00 | 0.00 |
| C    |      |     |     |     |        |          |        |      |      |
| ATOM | 6371 | CB  | LEU | 210 | 23.302 | -98.556  | 26.512 | 1.00 | 0.00 |
| C    |      |     |     |     |        |          |        |      |      |
| ATOM | 6372 | CG  | LEU | 210 | 22.413 | -97.710  | 27.422 | 1.00 | 0.00 |
| C    |      |     |     |     |        |          |        |      |      |
| ATOM | 6373 | CD1 | LEU | 210 | 22.623 | -96.208  | 27.246 | 1.00 | 0.00 |
| C    |      |     |     |     |        |          |        |      |      |
| ATOM | 6374 | CD2 | LEU | 210 | 20.921 | -97.934  | 27.179 | 1.00 | 0.00 |
| C    |      |     |     |     |        |          |        |      |      |
| ATOM | 6375 | C   | LEU | 210 | 24.628 | -100.592 | 26.026 | 1.00 | 0.00 |
| C    |      |     |     |     |        |          |        |      |      |
| ATOM | 6376 | O   | LEU | 210 | 24.521 | -100.585 | 24.790 | 1.00 | 0.00 |
| O    |      |     |     |     |        |          |        |      |      |
| ATOM | 6377 | N   | GLY | 211 | 25.601 | -101.284 | 26.667 | 1.00 | 0.00 |
| N    |      |     |     |     |        |          |        |      |      |
| ATOM | 6378 | CA  | GLY | 211 | 26.969 | -101.457 | 26.279 | 1.00 | 0.00 |
| C    |      |     |     |     |        |          |        |      |      |
| ATOM | 6379 | C   | GLY | 211 | 27.888 | -100.163 | 26.386 | 1.00 | 0.00 |
| C    |      |     |     |     |        |          |        |      |      |
| ATOM | 6380 | O   | GLY | 211 | 27.437 | -99.056  | 26.670 | 1.00 | 0.00 |
| O    |      |     |     |     |        |          |        |      |      |
| ATOM | 6381 | N   | ALA | 212 | 29.206 | -100.374 | 25.970 | 1.00 | 0.00 |
| N    |      |     |     |     |        |          |        |      |      |
| ATOM | 6382 | CA  | ALA | 212 | 30.210 | -99.382  | 26.081 | 1.00 | 0.00 |
| C    |      |     |     |     |        |          |        |      |      |
| ATOM | 6383 | CB  | ALA | 212 | 31.005 | -99.714  | 27.352 | 1.00 | 0.00 |
| C    |      |     |     |     |        |          |        |      |      |
| ATOM | 6384 | C   | ALA | 212 | 31.026 | -99.166  | 24.777 | 1.00 | 0.00 |
| C    |      |     |     |     |        |          |        |      |      |
| ATOM | 6385 | O   | ALA | 212 | 31.514 | -98.084  | 24.547 | 1.00 | 0.00 |
| O    |      |     |     |     |        |          |        |      |      |
| ATOM | 6386 | N   | ASP | 213 | 31.166 | -100.091 | 23.858 | 1.00 | 0.00 |
| N    |      |     |     |     |        |          |        |      |      |
| ATOM | 6387 | CA  | ASP | 213 | 31.812 | -99.857  | 22.523 | 1.00 | 0.00 |
| C    |      |     |     |     |        |          |        |      |      |
| ATOM | 6388 | CB  | ASP | 213 | 32.189 | -101.309 | 22.059 | 1.00 | 0.00 |
| C    |      |     |     |     |        |          |        |      |      |
| ATOM | 6389 | CG  | ASP | 213 | 32.651 | -101.379 | 20.643 | 1.00 | 0.00 |
| C    |      |     |     |     |        |          |        |      |      |



|      |      |     |     |     |        |          |        |      |      |
|------|------|-----|-----|-----|--------|----------|--------|------|------|
| ATOM | 6390 | OD1 | ASP | 213 | 32.622 | -102.514 | 20.132 | 1.00 | 0.00 |
| O    |      |     |     |     |        |          |        |      |      |
| ATOM | 6391 | OD2 | ASP | 213 | 33.344 | -100.465 | 20.176 | 1.00 | 0.00 |
| O1-  |      |     |     |     |        |          |        |      |      |
| ATOM | 6392 | C   | ASP | 213 | 30.808 | -99.281  | 21.478 | 1.00 | 0.00 |
| C    |      |     |     |     |        |          |        |      |      |
| ATOM | 6393 | O   | ASP | 213 | 30.064 | -100.033 | 20.774 | 1.00 | 0.00 |
| O    |      |     |     |     |        |          |        |      |      |
| ATOM | 6394 | N   | MET | 214 | 30.659 | -97.909  | 21.526 | 1.00 | 0.00 |
| N    |      |     |     |     |        |          |        |      |      |
| ATOM | 6395 | CA  | MET | 214 | 29.914 | -97.178  | 20.520 | 1.00 | 0.00 |
| C    |      |     |     |     |        |          |        |      |      |
| ATOM | 6396 | CB  | MET | 214 | 28.850 | -96.331  | 21.367 | 1.00 | 0.00 |
| C    |      |     |     |     |        |          |        |      |      |
| ATOM | 6397 | CG  | MET | 214 | 27.991 | -97.073  | 22.371 | 1.00 | 0.00 |
| C    |      |     |     |     |        |          |        |      |      |
| ATOM | 6398 | SD  | MET | 214 | 26.443 | -96.193  | 22.809 | 1.00 | 0.00 |
| S    |      |     |     |     |        |          |        |      |      |
| ATOM | 6399 | CE  | MET | 214 | 25.358 | -97.605  | 23.249 | 1.00 | 0.00 |
| C    |      |     |     |     |        |          |        |      |      |
| ATOM | 6400 | C   | MET | 214 | 30.794 | -96.212  | 19.699 | 1.00 | 0.00 |
| C    |      |     |     |     |        |          |        |      |      |
| ATOM | 6401 | O   | MET | 214 | 31.978 | -96.053  | 19.962 | 1.00 | 0.00 |
| O    |      |     |     |     |        |          |        |      |      |
| ATOM | 6402 | N   | GLU | 215 | 30.219 | -95.526  | 18.748 | 1.00 | 0.00 |
| N    |      |     |     |     |        |          |        |      |      |
| ATOM | 6403 | CA  | GLU | 215 | 30.838 | -94.401  | 18.056 | 1.00 | 0.00 |
| C    |      |     |     |     |        |          |        |      |      |
| ATOM | 6404 | CB  | GLU | 215 | 29.805 | -94.043  | 16.900 | 1.00 | 0.00 |
| C    |      |     |     |     |        |          |        |      |      |
| ATOM | 6405 | CG  | GLU | 215 | 29.243 | -95.090  | 15.976 | 1.00 | 0.00 |
| C    |      |     |     |     |        |          |        |      |      |
| ATOM | 6406 | CD  | GLU | 215 | 30.272 | -95.625  | 15.020 | 1.00 | 0.00 |
| C    |      |     |     |     |        |          |        |      |      |
| ATOM | 6407 | OE1 | GLU | 215 | 30.586 | -96.837  | 15.177 | 1.00 | 0.00 |
| O    |      |     |     |     |        |          |        |      |      |
| ATOM | 6408 | OE2 | GLU | 215 | 30.721 | -94.950  | 14.053 | 1.00 | 0.00 |
| O1-  |      |     |     |     |        |          |        |      |      |
| ATOM | 6409 | C   | GLU | 215 | 30.957 | -93.231  | 19.057 | 1.00 | 0.00 |
| C    |      |     |     |     |        |          |        |      |      |
| ATOM | 6410 | O   | GLU | 215 | 29.912 | -92.536  | 19.308 | 1.00 | 0.00 |
| O    |      |     |     |     |        |          |        |      |      |
| ATOM | 6411 | N   | GLU | 216 | 32.063 | -93.066  | 19.772 | 1.00 | 0.00 |
| N    |      |     |     |     |        |          |        |      |      |
| ATOM | 6412 | CA  | GLU | 216 | 32.272 | -91.966  | 20.835 | 1.00 | 0.00 |
| C    |      |     |     |     |        |          |        |      |      |
| ATOM | 6413 | CB  | GLU | 216 | 33.463 | -92.463  | 21.672 | 1.00 | 0.00 |
| C    |      |     |     |     |        |          |        |      |      |
| ATOM | 6414 | CG  | GLU | 216 | 33.676 | -91.717  | 22.980 | 1.00 | 0.00 |
| C    |      |     |     |     |        |          |        |      |      |
| ATOM | 6415 | CD  | GLU | 216 | 34.981 | -92.105  | 23.746 | 1.00 | 0.00 |
| C    |      |     |     |     |        |          |        |      |      |
| ATOM | 6416 | OE1 | GLU | 216 | 36.089 | -91.911  | 23.161 | 1.00 | 0.00 |
| O    |      |     |     |     |        |          |        |      |      |

|      |      |     |     |     |        |         |        |      |      |
|------|------|-----|-----|-----|--------|---------|--------|------|------|
| ATOM | 6417 | OE2 | GLU | 216 | 34.959 | -92.251 | 24.988 | 1.00 | 0.00 |
| O1-  |      |     |     |     |        |         |        |      |      |
| ATOM | 6418 | C   | GLU | 216 | 32.628 | -90.707 | 20.135 | 1.00 | 0.00 |
| C    |      |     |     |     |        |         |        |      |      |
| ATOM | 6419 | O   | GLU | 216 | 33.164 | -90.702 | 19.021 | 1.00 | 0.00 |
| O    |      |     |     |     |        |         |        |      |      |
| ATOM | 6420 | N   | PHE | 217 | 32.370 | -89.581 | 20.763 | 1.00 | 0.00 |
| N    |      |     |     |     |        |         |        |      |      |
| ATOM | 6421 | CA  | PHE | 217 | 32.694 | -88.184 | 20.328 | 1.00 | 0.00 |
| C    |      |     |     |     |        |         |        |      |      |
| ATOM | 6422 | CB  | PHE | 217 | 31.527 | -87.592 | 19.529 | 1.00 | 0.00 |
| C    |      |     |     |     |        |         |        |      |      |
| ATOM | 6423 | CG  | PHE | 217 | 31.002 | -88.393 | 18.375 | 1.00 | 0.00 |
| C    |      |     |     |     |        |         |        |      |      |
| ATOM | 6424 | CD1 | PHE | 217 | 31.729 | -88.538 | 17.169 | 1.00 | 0.00 |
| C    |      |     |     |     |        |         |        |      |      |
| ATOM | 6425 | CE1 | PHE | 217 | 31.128 | -89.169 | 16.016 | 1.00 | 0.00 |
| C    |      |     |     |     |        |         |        |      |      |
| ATOM | 6426 | CZ  | PHE | 217 | 29.826 | -89.586 | 16.158 | 1.00 | 0.00 |
| C    |      |     |     |     |        |         |        |      |      |
| ATOM | 6427 | CE2 | PHE | 217 | 29.142 | -89.546 | 17.400 | 1.00 | 0.00 |
| C    |      |     |     |     |        |         |        |      |      |
| ATOM | 6428 | CD2 | PHE | 217 | 29.707 | -88.991 | 18.525 | 1.00 | 0.00 |
| C    |      |     |     |     |        |         |        |      |      |
| ATOM | 6429 | C   | PHE | 217 | 33.043 | -87.185 | 21.443 | 1.00 | 0.00 |
| C    |      |     |     |     |        |         |        |      |      |
| ATOM | 6430 | O   | PHE | 217 | 32.363 | -87.054 | 22.476 | 1.00 | 0.00 |
| O    |      |     |     |     |        |         |        |      |      |
| ATOM | 6431 | N   | HIE | 218 | 34.175 | -86.454 | 21.222 | 1.00 | 0.00 |
| N    |      |     |     |     |        |         |        |      |      |
| ATOM | 6432 | CA  | HIE | 218 | 34.696 | -85.432 | 22.153 | 1.00 | 0.00 |
| C    |      |     |     |     |        |         |        |      |      |
| ATOM | 6433 | CB  | HIE | 218 | 36.214 | -85.617 | 22.301 | 1.00 | 0.00 |
| C    |      |     |     |     |        |         |        |      |      |
| ATOM | 6434 | CG  | HIE | 218 | 37.085 | -85.474 | 21.117 | 1.00 | 0.00 |
| C    |      |     |     |     |        |         |        |      |      |
| ATOM | 6435 | ND1 | HIE | 218 | 37.160 | -84.374 | 20.303 | 1.00 | 0.00 |
| N    |      |     |     |     |        |         |        |      |      |
| ATOM | 6436 | CE1 | HIE | 218 | 38.050 | -84.604 | 19.326 | 1.00 | 0.00 |
| C    |      |     |     |     |        |         |        |      |      |
| ATOM | 6437 | NE2 | HIE | 218 | 38.556 | -85.870 | 19.593 | 1.00 | 0.00 |
| N    |      |     |     |     |        |         |        |      |      |
| ATOM | 6438 | CD2 | HIE | 218 | 38.005 | -86.382 | 20.726 | 1.00 | 0.00 |
| C    |      |     |     |     |        |         |        |      |      |
| ATOM | 6439 | C   | HIE | 218 | 34.205 | -84.019 | 21.823 | 1.00 | 0.00 |
| C    |      |     |     |     |        |         |        |      |      |
| ATOM | 6440 | O   | HIE | 218 | 33.932 | -83.737 | 20.643 | 1.00 | 0.00 |
| O    |      |     |     |     |        |         |        |      |      |
| ATOM | 6441 | N   | GLY | 219 | 34.103 | -83.163 | 22.834 | 1.00 | 0.00 |
| N    |      |     |     |     |        |         |        |      |      |
| ATOM | 6442 | CA  | GLY | 219 | 33.623 | -81.781 | 22.672 | 1.00 | 0.00 |
| C    |      |     |     |     |        |         |        |      |      |
| ATOM | 6443 | C   | GLY | 219 | 32.174 | -81.753 | 22.076 | 1.00 | 0.00 |
| C    |      |     |     |     |        |         |        |      |      |

|      |      |     |     |     |        |         |        |      |      |
|------|------|-----|-----|-----|--------|---------|--------|------|------|
| ATOM | 6444 | O   | GLY | 219 | 31.415 | -82.711 | 22.204 | 1.00 | 0.00 |
| O    |      |     |     |     |        |         |        |      |      |
| ATOM | 6445 | N   | ARG | 220 | 31.710 | -80.606 | 21.580 | 1.00 | 0.00 |
| N    |      |     |     |     |        |         |        |      |      |
| ATOM | 6446 | CA  | ARG | 220 | 32.425 | -79.357 | 21.190 | 1.00 | 0.00 |
| C    |      |     |     |     |        |         |        |      |      |
| ATOM | 6447 | CB  | ARG | 220 | 32.902 | -79.651 | 19.770 | 1.00 | 0.00 |
| C    |      |     |     |     |        |         |        |      |      |
| ATOM | 6448 | CG  | ARG | 220 | 34.029 | -78.824 | 19.172 | 1.00 | 0.00 |
| C    |      |     |     |     |        |         |        |      |      |
| ATOM | 6449 | CD  | ARG | 220 | 35.160 | -78.216 | 20.123 | 1.00 | 0.00 |
| C    |      |     |     |     |        |         |        |      |      |
| ATOM | 6450 | NE  | ARG | 220 | 36.169 | -77.476 | 19.323 | 1.00 | 0.00 |
| N    |      |     |     |     |        |         |        |      |      |
| ATOM | 6451 | CZ  | ARG | 220 | 37.012 | -76.568 | 19.853 | 1.00 | 0.00 |
| C    |      |     |     |     |        |         |        |      |      |
| ATOM | 6452 | NH1 | ARG | 220 | 38.126 | -76.187 | 19.207 | 1.00 | 0.00 |
| N    |      |     |     |     |        |         |        |      |      |
| ATOM | 6453 | NH2 | ARG | 220 | 36.740 | -75.960 | 20.983 | 1.00 | 0.00 |
| N1+  |      |     |     |     |        |         |        |      |      |
| ATOM | 6454 | C   | ARG | 220 | 31.625 | -78.049 | 21.044 | 1.00 | 0.00 |
| C    |      |     |     |     |        |         |        |      |      |
| ATOM | 6455 | O   | ARG | 220 | 32.122 | -76.899 | 21.092 | 1.00 | 0.00 |
| O    |      |     |     |     |        |         |        |      |      |
| ATOM | 6456 | N   | THR | 221 | 30.336 | -78.178 | 20.814 | 1.00 | 0.00 |
| N    |      |     |     |     |        |         |        |      |      |
| ATOM | 6457 | CA  | THR | 221 | 29.390 | -77.014 | 20.484 | 1.00 | 0.00 |
| C    |      |     |     |     |        |         |        |      |      |
| ATOM | 6458 | CB  | THR | 221 | 28.038 | -77.544 | 20.029 | 1.00 | 0.00 |
| C    |      |     |     |     |        |         |        |      |      |
| ATOM | 6459 | CG2 | THR | 221 | 27.235 | -76.490 | 19.323 | 1.00 | 0.00 |
| C    |      |     |     |     |        |         |        |      |      |
| ATOM | 6460 | OG1 | THR | 221 | 28.267 | -78.522 | 19.062 | 1.00 | 0.00 |
| O    |      |     |     |     |        |         |        |      |      |
| ATOM | 6461 | C   | THR | 221 | 29.119 | -76.088 | 21.609 | 1.00 | 0.00 |
| C    |      |     |     |     |        |         |        |      |      |
| ATOM | 6462 | O   | THR | 221 | 28.768 | -76.660 | 22.677 | 1.00 | 0.00 |
| O    |      |     |     |     |        |         |        |      |      |
| ATOM | 6463 | N   | LEU | 222 | 29.336 | -74.875 | 21.561 | 1.00 | 0.00 |
| N    |      |     |     |     |        |         |        |      |      |
| ATOM | 6464 | CA  | LEU | 222 | 28.964 | -73.905 | 22.607 | 1.00 | 0.00 |
| C    |      |     |     |     |        |         |        |      |      |
| ATOM | 6465 | CB  | LEU | 222 | 30.043 | -73.625 | 23.649 | 1.00 | 0.00 |
| C    |      |     |     |     |        |         |        |      |      |
| ATOM | 6466 | CG  | LEU | 222 | 30.239 | -74.794 | 24.659 | 1.00 | 0.00 |
| C    |      |     |     |     |        |         |        |      |      |
| ATOM | 6467 | CD1 | LEU | 222 | 31.330 | -74.385 | 25.671 | 1.00 | 0.00 |
| C    |      |     |     |     |        |         |        |      |      |
| ATOM | 6468 | CD2 | LEU | 222 | 28.983 | -75.227 | 25.467 | 1.00 | 0.00 |
| C    |      |     |     |     |        |         |        |      |      |
| ATOM | 6469 | C   | LEU | 222 | 28.477 | -72.561 | 21.938 | 1.00 | 0.00 |
| C    |      |     |     |     |        |         |        |      |      |
| ATOM | 6470 | O   | LEU | 222 | 28.899 | -72.283 | 20.816 | 1.00 | 0.00 |
| O    |      |     |     |     |        |         |        |      |      |

|      |      |     |     |     |        |         |        |      |      |
|------|------|-----|-----|-----|--------|---------|--------|------|------|
| ATOM | 6471 | N   | HIP | 223 | 27.647 | -71.827 | 22.667 | 1.00 | 0.00 |
| N    |      |     |     |     |        |         |        |      |      |
| ATOM | 6472 | CA  | HIP | 223 | 27.170 | -70.530 | 22.191 | 1.00 | 0.00 |
| C    |      |     |     |     |        |         |        |      |      |
| ATOM | 6473 | CB  | HIP | 223 | 25.717 | -70.679 | 21.564 | 1.00 | 0.00 |
| C    |      |     |     |     |        |         |        |      |      |
| ATOM | 6474 | CG  | HIP | 223 | 25.590 | -71.818 | 20.610 | 1.00 | 0.00 |
| C    |      |     |     |     |        |         |        |      |      |
| ATOM | 6475 | ND1 | HIP | 223 | 26.333 | -71.944 | 19.398 | 1.00 | 0.00 |
| N1+  |      |     |     |     |        |         |        |      |      |
| ATOM | 6476 | CE1 | HIP | 223 | 25.816 | -72.946 | 18.660 | 1.00 | 0.00 |
| C    |      |     |     |     |        |         |        |      |      |
| ATOM | 6477 | NE2 | HIP | 223 | 24.866 | -73.561 | 19.434 | 1.00 | 0.00 |
| N    |      |     |     |     |        |         |        |      |      |
| ATOM | 6478 | CD2 | HIP | 223 | 24.732 | -72.863 | 20.663 | 1.00 | 0.00 |
| C    |      |     |     |     |        |         |        |      |      |
| ATOM | 6479 | C   | HIP | 223 | 27.299 | -69.414 | 23.262 | 1.00 | 0.00 |
| C    |      |     |     |     |        |         |        |      |      |
| ATOM | 6480 | O   | HIP | 223 | 27.164 | -69.672 | 24.443 | 1.00 | 0.00 |
| O    |      |     |     |     |        |         |        |      |      |
| ATOM | 6481 | N   | ASP | 224 | 27.444 | -68.137 | 22.740 | 1.00 | 0.00 |
| N    |      |     |     |     |        |         |        |      |      |
| ATOM | 6482 | CA  | ASP | 224 | 27.512 | -66.980 | 23.662 | 1.00 | 0.00 |
| C    |      |     |     |     |        |         |        |      |      |
| ATOM | 6483 | CB  | ASP | 224 | 28.040 | -65.732 | 22.912 | 1.00 | 0.00 |
| C    |      |     |     |     |        |         |        |      |      |
| ATOM | 6484 | CG  | ASP | 224 | 29.401 | -65.731 | 22.281 | 1.00 | 0.00 |
| C    |      |     |     |     |        |         |        |      |      |
| ATOM | 6485 | OD1 | ASP | 224 | 29.594 | -64.755 | 21.558 | 1.00 | 0.00 |
| O    |      |     |     |     |        |         |        |      |      |
| ATOM | 6486 | OD2 | ASP | 224 | 30.301 | -66.590 | 22.615 | 1.00 | 0.00 |
| O1-  |      |     |     |     |        |         |        |      |      |
| ATOM | 6487 | C   | ASP | 224 | 26.363 | -66.610 | 24.529 | 1.00 | 0.00 |
| C    |      |     |     |     |        |         |        |      |      |
| ATOM | 6488 | O   | ASP | 224 | 25.218 | -66.793 | 24.077 | 1.00 | 0.00 |
| O    |      |     |     |     |        |         |        |      |      |
| ATOM | 6489 | N   | ASP | 225 | 26.590 | -66.170 | 25.774 | 1.00 | 0.00 |
| N    |      |     |     |     |        |         |        |      |      |
| ATOM | 6490 | CA  | ASP | 225 | 25.508 | -65.829 | 26.695 | 1.00 | 0.00 |
| C    |      |     |     |     |        |         |        |      |      |
| ATOM | 6491 | CB  | ASP | 225 | 26.121 | -65.512 | 28.147 | 1.00 | 0.00 |
| C    |      |     |     |     |        |         |        |      |      |
| ATOM | 6492 | CG  | ASP | 225 | 26.662 | -66.688 | 28.942 | 1.00 | 0.00 |
| C    |      |     |     |     |        |         |        |      |      |
| ATOM | 6493 | OD1 | ASP | 225 | 27.072 | -66.389 | 30.098 | 1.00 | 0.00 |
| O    |      |     |     |     |        |         |        |      |      |
| ATOM | 6494 | OD2 | ASP | 225 | 26.583 | -67.895 | 28.559 | 1.00 | 0.00 |
| O1-  |      |     |     |     |        |         |        |      |      |
| ATOM | 6495 | C   | ASP | 225 | 24.719 | -64.659 | 26.096 | 1.00 | 0.00 |
| C    |      |     |     |     |        |         |        |      |      |
| ATOM | 6496 | O   | ASP | 225 | 25.312 | -63.787 | 25.464 | 1.00 | 0.00 |
| O    |      |     |     |     |        |         |        |      |      |
| ATOM | 6497 | N   | ASP | 226 | 23.381 | -64.689 | 26.232 | 1.00 | 0.00 |
| N    |      |     |     |     |        |         |        |      |      |

|      |      |     |     |     |        |         |        |      |      |
|------|------|-----|-----|-----|--------|---------|--------|------|------|
| ATOM | 6498 | CA  | ASP | 226 | 22.469 | -63.816 | 25.513 | 1.00 | 0.00 |
| C    |      |     |     |     |        |         |        |      |      |
| ATOM | 6499 | CB  | ASP | 226 | 22.594 | -62.503 | 26.229 | 1.00 | 0.00 |
| C    |      |     |     |     |        |         |        |      |      |
| ATOM | 6500 | CG  | ASP | 226 | 21.397 | -61.590 | 26.183 | 1.00 | 0.00 |
| C    |      |     |     |     |        |         |        |      |      |
| ATOM | 6501 | OD1 | ASP | 226 | 20.262 | -61.990 | 26.428 | 1.00 | 0.00 |
| O    |      |     |     |     |        |         |        |      |      |
| ATOM | 6502 | OD2 | ASP | 226 | 21.474 | -60.352 | 25.883 | 1.00 | 0.00 |
| O1-  |      |     |     |     |        |         |        |      |      |
| ATOM | 6503 | C   | ASP | 226 | 22.381 | -63.847 | 23.965 | 1.00 | 0.00 |
| C    |      |     |     |     |        |         |        |      |      |
| ATOM | 6504 | O   | ASP | 226 | 21.478 | -63.230 | 23.352 | 1.00 | 0.00 |
| O    |      |     |     |     |        |         |        |      |      |
| ATOM | 6505 | N   | SER | 227 | 23.184 | -64.682 | 23.257 | 1.00 | 0.00 |
| N    |      |     |     |     |        |         |        |      |      |
| ATOM | 6506 | CA  | SER | 227 | 22.911 | -64.984 | 21.860 | 1.00 | 0.00 |
| C    |      |     |     |     |        |         |        |      |      |
| ATOM | 6507 | CB  | SER | 227 | 23.952 | -65.908 | 21.171 | 1.00 | 0.00 |
| C    |      |     |     |     |        |         |        |      |      |
| ATOM | 6508 | OG  | SER | 227 | 23.915 | -67.207 | 21.626 | 1.00 | 0.00 |
| O    |      |     |     |     |        |         |        |      |      |
| ATOM | 6509 | C   | SER | 227 | 21.491 | -65.482 | 21.518 | 1.00 | 0.00 |
| C    |      |     |     |     |        |         |        |      |      |
| ATOM | 6510 | O   | SER | 227 | 20.876 | -66.215 | 22.353 | 1.00 | 0.00 |
| O    |      |     |     |     |        |         |        |      |      |
| ATOM | 6511 | N   | CYS | 228 | 20.979 | -65.172 | 20.355 | 1.00 | 0.00 |
| N    |      |     |     |     |        |         |        |      |      |
| ATOM | 6512 | CA  | CYS | 228 | 19.864 | -65.797 | 19.696 | 1.00 | 0.00 |
| C    |      |     |     |     |        |         |        |      |      |
| ATOM | 6513 | CB  | CYS | 228 | 19.096 | -64.681 | 18.937 | 1.00 | 0.00 |
| C    |      |     |     |     |        |         |        |      |      |
| ATOM | 6514 | SG  | CYS | 228 | 17.673 | -65.046 | 18.065 | 1.00 | 0.00 |
| S    |      |     |     |     |        |         |        |      |      |
| ATOM | 6515 | C   | CYS | 228 | 20.286 | -67.071 | 18.948 | 1.00 | 0.00 |
| C    |      |     |     |     |        |         |        |      |      |
| ATOM | 6516 | O   | CYS | 228 | 21.262 | -67.105 | 18.214 | 1.00 | 0.00 |
| O    |      |     |     |     |        |         |        |      |      |
| ATOM | 6517 | N   | GLN | 229 | 19.551 | -68.153 | 19.145 | 1.00 | 0.00 |
| N    |      |     |     |     |        |         |        |      |      |
| ATOM | 6518 | CA  | GLN | 229 | 19.833 | -69.511 | 18.604 | 1.00 | 0.00 |
| C    |      |     |     |     |        |         |        |      |      |
| ATOM | 6519 | CB  | GLN | 229 | 20.583 | -70.416 | 19.649 | 1.00 | 0.00 |
| C    |      |     |     |     |        |         |        |      |      |
| ATOM | 6520 | CG  | GLN | 229 | 21.924 | -69.877 | 20.099 | 1.00 | 0.00 |
| C    |      |     |     |     |        |         |        |      |      |
| ATOM | 6521 | CD  | GLN | 229 | 22.920 | -69.782 | 18.973 | 1.00 | 0.00 |
| C    |      |     |     |     |        |         |        |      |      |
| ATOM | 6522 | OE1 | GLN | 229 | 22.908 | -70.595 | 18.122 | 1.00 | 0.00 |
| O    |      |     |     |     |        |         |        |      |      |
| ATOM | 6523 | NE2 | GLN | 229 | 23.749 | -68.688 | 18.904 | 1.00 | 0.00 |
| N    |      |     |     |     |        |         |        |      |      |
| ATOM | 6524 | C   | GLN | 229 | 18.493 | -70.142 | 18.136 | 1.00 | 0.00 |
| C    |      |     |     |     |        |         |        |      |      |

|      |      |     |     |     |        |         |        |      |      |
|------|------|-----|-----|-----|--------|---------|--------|------|------|
| ATOM | 6525 | O   | GLN | 229 | 17.386 | -69.779 | 18.590 | 1.00 | 0.00 |
| O    |      |     |     |     |        |         |        |      |      |
| ATOM | 6526 | N   | VAL | 230 | 18.543 | -71.161 | 17.237 | 1.00 | 0.00 |
| N    |      |     |     |     |        |         |        |      |      |
| ATOM | 6527 | CA  | VAL | 230 | 17.429 | -72.047 | 16.946 | 1.00 | 0.00 |
| C    |      |     |     |     |        |         |        |      |      |
| ATOM | 6528 | CB  | VAL | 230 | 16.855 | -71.782 | 15.562 | 1.00 | 0.00 |
| C    |      |     |     |     |        |         |        |      |      |
| ATOM | 6529 | CG1 | VAL | 230 | 15.633 | -72.671 | 15.333 | 1.00 | 0.00 |
| C    |      |     |     |     |        |         |        |      |      |
| ATOM | 6530 | CG2 | VAL | 230 | 16.260 | -70.355 | 15.368 | 1.00 | 0.00 |
| C    |      |     |     |     |        |         |        |      |      |
| ATOM | 6531 | C   | VAL | 230 | 17.870 | -73.457 | 17.114 | 1.00 | 0.00 |
| C    |      |     |     |     |        |         |        |      |      |
| ATOM | 6532 | O   | VAL | 230 | 18.956 | -73.656 | 16.602 | 1.00 | 0.00 |
| O    |      |     |     |     |        |         |        |      |      |
| ATOM | 6533 | N   | ILE | 231 | 17.248 | -74.381 | 17.882 | 1.00 | 0.00 |
| N    |      |     |     |     |        |         |        |      |      |
| ATOM | 6534 | CA  | ILE | 231 | 17.825 | -75.800 | 18.197 | 1.00 | 0.00 |
| C    |      |     |     |     |        |         |        |      |      |
| ATOM | 6535 | CB  | ILE | 231 | 18.333 | -75.923 | 19.681 | 1.00 | 0.00 |
| C    |      |     |     |     |        |         |        |      |      |
| ATOM | 6536 | CG2 | ILE | 231 | 19.180 | -77.252 | 19.934 | 1.00 | 0.00 |
| C    |      |     |     |     |        |         |        |      |      |
| ATOM | 6537 | CG1 | ILE | 231 | 19.262 | -74.724 | 20.165 | 1.00 | 0.00 |
| C    |      |     |     |     |        |         |        |      |      |
| ATOM | 6538 | CD1 | ILE | 231 | 20.643 | -74.704 | 19.510 | 1.00 | 0.00 |
| C    |      |     |     |     |        |         |        |      |      |
| ATOM | 6539 | C   | ILE | 231 | 16.759 | -76.874 | 18.049 | 1.00 | 0.00 |
| C    |      |     |     |     |        |         |        |      |      |
| ATOM | 6540 | O   | ILE | 231 | 15.618 | -76.518 | 18.318 | 1.00 | 0.00 |
| O    |      |     |     |     |        |         |        |      |      |
| ATOM | 6541 | N   | PRO | 232 | 17.089 | -78.066 | 17.569 | 1.00 | 0.00 |
| N    |      |     |     |     |        |         |        |      |      |
| ATOM | 6542 | CD  | PRO | 232 | 18.212 | -78.396 | 16.748 | 1.00 | 0.00 |
| C    |      |     |     |     |        |         |        |      |      |
| ATOM | 6543 | CG  | PRO | 232 | 17.985 | -79.924 | 16.481 | 1.00 | 0.00 |
| C    |      |     |     |     |        |         |        |      |      |
| ATOM | 6544 | CB  | PRO | 232 | 16.497 | -80.219 | 16.586 | 1.00 | 0.00 |
| C    |      |     |     |     |        |         |        |      |      |
| ATOM | 6545 | CA  | PRO | 232 | 16.051 | -79.145 | 17.570 | 1.00 | 0.00 |
| C    |      |     |     |     |        |         |        |      |      |
| ATOM | 6546 | C   | PRO | 232 | 15.729 | -79.731 | 18.982 | 1.00 | 0.00 |
| C    |      |     |     |     |        |         |        |      |      |
| ATOM | 6547 | O   | PRO | 232 | 16.613 | -80.142 | 19.734 | 1.00 | 0.00 |
| O    |      |     |     |     |        |         |        |      |      |
| ATOM | 6548 | N   | VAL | 233 | 14.458 | -80.031 | 19.141 | 1.00 | 0.00 |
| N    |      |     |     |     |        |         |        |      |      |
| ATOM | 6549 | CA  | VAL | 233 | 13.951 | -80.305 | 20.480 | 1.00 | 0.00 |
| C    |      |     |     |     |        |         |        |      |      |
| ATOM | 6550 | CB  | VAL | 233 | 12.643 | -79.501 | 20.566 | 1.00 | 0.00 |
| C    |      |     |     |     |        |         |        |      |      |
| ATOM | 6551 | CG1 | VAL | 233 | 11.967 | -79.729 | 21.947 | 1.00 | 0.00 |
| C    |      |     |     |     |        |         |        |      |      |

|      |      |     |     |     |        |         |        |      |      |
|------|------|-----|-----|-----|--------|---------|--------|------|------|
| ATOM | 6552 | CG2 | VAL | 233 | 12.834 | -77.978 | 20.444 | 1.00 | 0.00 |
| C    |      |     |     |     |        |         |        |      |      |
| ATOM | 6553 | C   | VAL | 233 | 13.659 | -81.765 | 20.587 | 1.00 | 0.00 |
| C    |      |     |     |     |        |         |        |      |      |
| ATOM | 6554 | O   | VAL | 233 | 13.025 | -82.316 | 19.704 | 1.00 | 0.00 |
| O    |      |     |     |     |        |         |        |      |      |
| ATOM | 6555 | N   | LEU | 234 | 14.268 | -82.427 | 21.597 | 1.00 | 0.00 |
| N    |      |     |     |     |        |         |        |      |      |
| ATOM | 6556 | CA  | LEU | 234 | 14.315 | -83.987 | 21.707 | 1.00 | 0.00 |
| C    |      |     |     |     |        |         |        |      |      |
| ATOM | 6557 | CB  | LEU | 234 | 15.245 | -84.313 | 22.922 | 1.00 | 0.00 |
| C    |      |     |     |     |        |         |        |      |      |
| ATOM | 6558 | CG  | LEU | 234 | 15.696 | -85.757 | 22.776 | 1.00 | 0.00 |
| C    |      |     |     |     |        |         |        |      |      |
| ATOM | 6559 | CD1 | LEU | 234 | 16.748 | -86.096 | 21.747 | 1.00 | 0.00 |
| C    |      |     |     |     |        |         |        |      |      |
| ATOM | 6560 | CD2 | LEU | 234 | 16.157 | -86.166 | 24.226 | 1.00 | 0.00 |
| C    |      |     |     |     |        |         |        |      |      |
| ATOM | 6561 | C   | LEU | 234 | 12.901 | -84.656 | 21.871 | 1.00 | 0.00 |
| C    |      |     |     |     |        |         |        |      |      |
| ATOM | 6562 | O   | LEU | 234 | 12.134 | -84.245 | 22.726 | 1.00 | 0.00 |
| O    |      |     |     |     |        |         |        |      |      |
| ATOM | 6563 | N   | PRO | 235 | 12.485 | -85.584 | 20.990 | 1.00 | 0.00 |
| N    |      |     |     |     |        |         |        |      |      |
| ATOM | 6564 | CD  | PRO | 235 | 13.288 | -86.205 | 19.931 | 1.00 | 0.00 |
| C    |      |     |     |     |        |         |        |      |      |
| ATOM | 6565 | CG  | PRO | 235 | 12.711 | -87.536 | 19.638 | 1.00 | 0.00 |
| C    |      |     |     |     |        |         |        |      |      |
| ATOM | 6566 | CB  | PRO | 235 | 11.222 | -87.243 | 19.867 | 1.00 | 0.00 |
| C    |      |     |     |     |        |         |        |      |      |
| ATOM | 6567 | CA  | PRO | 235 | 11.193 | -86.253 | 21.089 | 1.00 | 0.00 |
| C    |      |     |     |     |        |         |        |      |      |
| ATOM | 6568 | C   | PRO | 235 | 11.083 | -86.975 | 22.439 | 1.00 | 0.00 |
| C    |      |     |     |     |        |         |        |      |      |
| ATOM | 6569 | O   | PRO | 235 | 12.145 | -87.428 | 22.952 | 1.00 | 0.00 |
| O    |      |     |     |     |        |         |        |      |      |
| ATOM | 6570 | N   | GLN | 236 | 9.861  | -87.197 | 22.952 | 1.00 | 0.00 |
| N    |      |     |     |     |        |         |        |      |      |
| ATOM | 6571 | CA  | GLN | 236 | 9.466  | -88.091 | 24.031 | 1.00 | 0.00 |
| C    |      |     |     |     |        |         |        |      |      |
| ATOM | 6572 | CB  | GLN | 236 | 10.012 | -89.529 | 23.797 | 1.00 | 0.00 |
| C    |      |     |     |     |        |         |        |      |      |
| ATOM | 6573 | CG  | GLN | 236 | 9.293  | -90.628 | 24.559 | 1.00 | 0.00 |
| C    |      |     |     |     |        |         |        |      |      |
| ATOM | 6574 | CD  | GLN | 236 | 9.907  | -91.977 | 24.303 | 1.00 | 0.00 |
| C    |      |     |     |     |        |         |        |      |      |
| ATOM | 6575 | OE1 | GLN | 236 | 10.875 | -92.099 | 23.594 | 1.00 | 0.00 |
| O    |      |     |     |     |        |         |        |      |      |
| ATOM | 6576 | NE2 | GLN | 236 | 9.341  | -93.069 | 24.753 | 1.00 | 0.00 |
| N    |      |     |     |     |        |         |        |      |      |
| ATOM | 6577 | C   | GLN | 236 | 9.916  | -87.618 | 25.389 | 1.00 | 0.00 |
| C    |      |     |     |     |        |         |        |      |      |
| ATOM | 6578 | O   | GLN | 236 | 9.166  | -87.818 | 26.331 | 1.00 | 0.00 |
| O    |      |     |     |     |        |         |        |      |      |

|      |      |     |     |     |        |         |        |      |      |
|------|------|-----|-----|-----|--------|---------|--------|------|------|
| ATOM | 6579 | N   | VAL | 237 | 11.154 | -87.029 | 25.553 | 1.00 | 0.00 |
| N    |      |     |     |     |        |         |        |      |      |
| ATOM | 6580 | CA  | VAL | 237 | 11.561 | -86.457 | 26.852 | 1.00 | 0.00 |
| C    |      |     |     |     |        |         |        |      |      |
| ATOM | 6581 | CB  | VAL | 237 | 12.964 | -85.796 | 26.678 | 1.00 | 0.00 |
| C    |      |     |     |     |        |         |        |      |      |
| ATOM | 6582 | CG1 | VAL | 237 | 12.751 | -84.434 | 26.119 | 1.00 | 0.00 |
| C    |      |     |     |     |        |         |        |      |      |
| ATOM | 6583 | CG2 | VAL | 237 | 13.624 | -85.783 | 27.993 | 1.00 | 0.00 |
| C    |      |     |     |     |        |         |        |      |      |
| ATOM | 6584 | C   | VAL | 237 | 10.481 | -85.610 | 27.529 | 1.00 | 0.00 |
| C    |      |     |     |     |        |         |        |      |      |
| ATOM | 6585 | O   | VAL | 237 | 9.710  | -84.953 | 26.794 | 1.00 | 0.00 |
| O    |      |     |     |     |        |         |        |      |      |
| ATOM | 6586 | N   | MET | 238 | 10.443 | -85.665 | 28.840 | 1.00 | 0.00 |
| N    |      |     |     |     |        |         |        |      |      |
| ATOM | 6587 | CA  | MET | 238 | 9.486  | -84.945 | 29.653 | 1.00 | 0.00 |
| C    |      |     |     |     |        |         |        |      |      |
| ATOM | 6588 | CB  | MET | 238 | 8.285  | -85.897 | 29.793 | 1.00 | 0.00 |
| C    |      |     |     |     |        |         |        |      |      |
| ATOM | 6589 | CG  | MET | 238 | 7.112  | -85.160 | 30.421 | 1.00 | 0.00 |
| C    |      |     |     |     |        |         |        |      |      |
| ATOM | 6590 | SD  | MET | 238 | 5.736  | -86.131 | 30.923 | 1.00 | 0.00 |
| S    |      |     |     |     |        |         |        |      |      |
| ATOM | 6591 | CE  | MET | 238 | 4.485  | -84.961 | 31.346 | 1.00 | 0.00 |
| C    |      |     |     |     |        |         |        |      |      |
| ATOM | 6592 | C   | MET | 238 | 10.103 | -84.413 | 30.991 | 1.00 | 0.00 |
| C    |      |     |     |     |        |         |        |      |      |
| ATOM | 6593 | O   | MET | 238 | 9.730  | -83.327 | 31.459 | 1.00 | 0.00 |
| O    |      |     |     |     |        |         |        |      |      |
| ATOM | 6594 | N   | MET | 239 | 11.055 | -85.075 | 31.673 | 1.00 | 0.00 |
| N    |      |     |     |     |        |         |        |      |      |
| ATOM | 6595 | CA  | MET | 239 | 11.977 | -84.461 | 32.683 | 1.00 | 0.00 |
| C    |      |     |     |     |        |         |        |      |      |
| ATOM | 6596 | CB  | MET | 239 | 13.075 | -85.378 | 33.049 | 1.00 | 0.00 |
| C    |      |     |     |     |        |         |        |      |      |
| ATOM | 6597 | CG  | MET | 239 | 14.027 | -85.609 | 31.931 | 1.00 | 0.00 |
| C    |      |     |     |     |        |         |        |      |      |
| ATOM | 6598 | SD  | MET | 239 | 15.420 | -86.746 | 32.505 | 1.00 | 0.00 |
| S    |      |     |     |     |        |         |        |      |      |
| ATOM | 6599 | CE  | MET | 239 | 16.526 | -85.625 | 33.456 | 1.00 | 0.00 |
| C    |      |     |     |     |        |         |        |      |      |
| ATOM | 6600 | C   | MET | 239 | 12.558 | -83.060 | 32.250 | 1.00 | 0.00 |
| C    |      |     |     |     |        |         |        |      |      |
| ATOM | 6601 | O   | MET | 239 | 12.782 | -82.819 | 31.059 | 1.00 | 0.00 |
| O    |      |     |     |     |        |         |        |      |      |
| ATOM | 6602 | N   | ILE | 240 | 12.823 | -82.245 | 33.206 | 1.00 | 0.00 |
| N    |      |     |     |     |        |         |        |      |      |
| ATOM | 6603 | CA  | ILE | 240 | 13.645 | -81.037 | 33.041 | 1.00 | 0.00 |
| C    |      |     |     |     |        |         |        |      |      |
| ATOM | 6604 | CB  | ILE | 240 | 13.259 | -79.956 | 34.105 | 1.00 | 0.00 |
| C    |      |     |     |     |        |         |        |      |      |
| ATOM | 6605 | CG2 | ILE | 240 | 14.255 | -78.731 | 34.157 | 1.00 | 0.00 |
| C    |      |     |     |     |        |         |        |      |      |



|      |      |     |     |     |        |         |        |      |      |
|------|------|-----|-----|-----|--------|---------|--------|------|------|
| ATOM | 6606 | CG1 | ILE | 240 | 11.850 | -79.449 | 33.842 | 1.00 | 0.00 |
| C    |      |     |     |     |        |         |        |      |      |
| ATOM | 6607 | CD1 | ILE | 240 | 11.284 | -78.576 | 34.950 | 1.00 | 0.00 |
| C    |      |     |     |     |        |         |        |      |      |
| ATOM | 6608 | C   | ILE | 240 | 15.107 | -81.421 | 33.240 | 1.00 | 0.00 |
| C    |      |     |     |     |        |         |        |      |      |
| ATOM | 6609 | O   | ILE | 240 | 15.486 | -82.054 | 34.197 | 1.00 | 0.00 |
| O    |      |     |     |     |        |         |        |      |      |
| ATOM | 6610 | N   | LEU | 241 | 15.955 | -80.945 | 32.308 | 1.00 | 0.00 |
| N    |      |     |     |     |        |         |        |      |      |
| ATOM | 6611 | CA  | LEU | 241 | 17.447 | -81.228 | 32.268 | 1.00 | 0.00 |
| C    |      |     |     |     |        |         |        |      |      |
| ATOM | 6612 | CB  | LEU | 241 | 17.773 | -81.477 | 30.784 | 1.00 | 0.00 |
| C    |      |     |     |     |        |         |        |      |      |
| ATOM | 6613 | CG  | LEU | 241 | 19.202 | -82.113 | 30.610 | 1.00 | 0.00 |
| C    |      |     |     |     |        |         |        |      |      |
| ATOM | 6614 | CD1 | LEU | 241 | 19.232 | -83.550 | 31.051 | 1.00 | 0.00 |
| C    |      |     |     |     |        |         |        |      |      |
| ATOM | 6615 | CD2 | LEU | 241 | 19.491 | -82.032 | 29.087 | 1.00 | 0.00 |
| C    |      |     |     |     |        |         |        |      |      |
| ATOM | 6616 | C   | LEU | 241 | 18.379 | -80.109 | 32.835 | 1.00 | 0.00 |
| C    |      |     |     |     |        |         |        |      |      |
| ATOM | 6617 | O   | LEU | 241 | 18.029 | -78.931 | 32.715 | 1.00 | 0.00 |
| O    |      |     |     |     |        |         |        |      |      |
| ATOM | 6618 | N   | ILE | 242 | 19.487 | -80.555 | 33.525 | 1.00 | 0.00 |
| N    |      |     |     |     |        |         |        |      |      |
| ATOM | 6619 | CA  | ILE | 242 | 20.420 | -79.730 | 34.321 | 1.00 | 0.00 |
| C    |      |     |     |     |        |         |        |      |      |
| ATOM | 6620 | CB  | ILE | 242 | 20.493 | -80.173 | 35.761 | 1.00 | 0.00 |
| C    |      |     |     |     |        |         |        |      |      |
| ATOM | 6621 | CG2 | ILE | 242 | 21.567 | -79.499 | 36.622 | 1.00 | 0.00 |
| C    |      |     |     |     |        |         |        |      |      |
| ATOM | 6622 | CG1 | ILE | 242 | 19.167 | -80.247 | 36.556 | 1.00 | 0.00 |
| C    |      |     |     |     |        |         |        |      |      |
| ATOM | 6623 | CD1 | ILE | 242 | 18.547 | -78.921 | 36.970 | 1.00 | 0.00 |
| C    |      |     |     |     |        |         |        |      |      |
| ATOM | 6624 | C   | ILE | 242 | 21.793 | -79.710 | 33.539 | 1.00 | 0.00 |
| C    |      |     |     |     |        |         |        |      |      |
| ATOM | 6625 | O   | ILE | 242 | 22.244 | -80.719 | 33.052 | 1.00 | 0.00 |
| O    |      |     |     |     |        |         |        |      |      |
| ATOM | 6626 | N   | PRO | 243 | 22.430 | -78.538 | 33.330 | 1.00 | 0.00 |
| N    |      |     |     |     |        |         |        |      |      |
| ATOM | 6627 | CD  | PRO | 243 | 21.947 | -77.194 | 33.721 | 1.00 | 0.00 |
| C    |      |     |     |     |        |         |        |      |      |
| ATOM | 6628 | CG  | PRO | 243 | 22.876 | -76.190 | 33.159 | 1.00 | 0.00 |
| C    |      |     |     |     |        |         |        |      |      |
| ATOM | 6629 | CB  | PRO | 243 | 24.175 | -76.950 | 33.055 | 1.00 | 0.00 |
| C    |      |     |     |     |        |         |        |      |      |
| ATOM | 6630 | CA  | PRO | 243 | 23.823 | -78.496 | 32.805 | 1.00 | 0.00 |
| C    |      |     |     |     |        |         |        |      |      |
| ATOM | 6631 | C   | PRO | 243 | 24.840 | -79.404 | 33.488 | 1.00 | 0.00 |
| C    |      |     |     |     |        |         |        |      |      |
| ATOM | 6632 | O   | PRO | 243 | 24.739 | -79.590 | 34.703 | 1.00 | 0.00 |
| O    |      |     |     |     |        |         |        |      |      |

|      |      |     |     |     |        |         |        |      |      |
|------|------|-----|-----|-----|--------|---------|--------|------|------|
| ATOM | 6633 | N   | GLY | 244 | 25.765 | -80.037 | 32.732 | 1.00 | 0.00 |
| N    |      |     |     |     |        |         |        |      |      |
| ATOM | 6634 | CA  | GLY | 244 | 26.618 | -81.073 | 33.267 | 1.00 | 0.00 |
| C    |      |     |     |     |        |         |        |      |      |
| ATOM | 6635 | C   | GLY | 244 | 25.965 | -82.488 | 33.568 | 1.00 | 0.00 |
| C    |      |     |     |     |        |         |        |      |      |
| ATOM | 6636 | O   | GLY | 244 | 26.688 | -83.507 | 33.742 | 1.00 | 0.00 |
| O    |      |     |     |     |        |         |        |      |      |
| ATOM | 6637 | N   | GLN | 245 | 24.632 | -82.650 | 33.558 | 1.00 | 0.00 |
| N    |      |     |     |     |        |         |        |      |      |
| ATOM | 6638 | CA  | GLN | 245 | 23.884 | -83.922 | 33.810 | 1.00 | 0.00 |
| C    |      |     |     |     |        |         |        |      |      |
| ATOM | 6639 | CB  | GLN | 245 | 22.379 | -83.588 | 33.944 | 1.00 | 0.00 |
| C    |      |     |     |     |        |         |        |      |      |
| ATOM | 6640 | CG  | GLN | 245 | 21.611 | -84.754 | 34.495 | 1.00 | 0.00 |
| C    |      |     |     |     |        |         |        |      |      |
| ATOM | 6641 | CD  | GLN | 245 | 20.256 | -84.459 | 35.058 | 1.00 | 0.00 |
| C    |      |     |     |     |        |         |        |      |      |
| ATOM | 6642 | OE1 | GLN | 245 | 19.578 | -83.569 | 34.542 | 1.00 | 0.00 |
| O    |      |     |     |     |        |         |        |      |      |
| ATOM | 6643 | NE2 | GLN | 245 | 19.863 | -85.102 | 36.107 | 1.00 | 0.00 |
| N    |      |     |     |     |        |         |        |      |      |
| ATOM | 6644 | C   | GLN | 245 | 24.122 | -84.885 | 32.596 | 1.00 | 0.00 |
| C    |      |     |     |     |        |         |        |      |      |
| ATOM | 6645 | O   | GLN | 245 | 23.909 | -84.408 | 31.459 | 1.00 | 0.00 |
| O    |      |     |     |     |        |         |        |      |      |
| ATOM | 6646 | N   | THR | 246 | 24.466 | -86.168 | 32.835 | 1.00 | 0.00 |
| N    |      |     |     |     |        |         |        |      |      |
| ATOM | 6647 | CA  | THR | 246 | 24.458 | -87.294 | 31.913 | 1.00 | 0.00 |
| C    |      |     |     |     |        |         |        |      |      |
| ATOM | 6648 | CB  | THR | 246 | 25.359 | -88.460 | 32.371 | 1.00 | 0.00 |
| C    |      |     |     |     |        |         |        |      |      |
| ATOM | 6649 | CG2 | THR | 246 | 25.331 | -89.700 | 31.497 | 1.00 | 0.00 |
| C    |      |     |     |     |        |         |        |      |      |
| ATOM | 6650 | OG1 | THR | 246 | 26.725 | -88.096 | 32.288 | 1.00 | 0.00 |
| O    |      |     |     |     |        |         |        |      |      |
| ATOM | 6651 | C   | THR | 246 | 23.052 | -87.769 | 31.569 | 1.00 | 0.00 |
| C    |      |     |     |     |        |         |        |      |      |
| ATOM | 6652 | O   | THR | 246 | 22.176 | -87.819 | 32.515 | 1.00 | 0.00 |
| O    |      |     |     |     |        |         |        |      |      |
| ATOM | 6653 | N   | LEU | 247 | 22.773 | -88.194 | 30.358 | 1.00 | 0.00 |
| N    |      |     |     |     |        |         |        |      |      |
| ATOM | 6654 | CA  | LEU | 247 | 21.435 | -88.466 | 29.854 | 1.00 | 0.00 |
| C    |      |     |     |     |        |         |        |      |      |
| ATOM | 6655 | CB  | LEU | 247 | 20.885 | -87.137 | 29.180 | 1.00 | 0.00 |
| C    |      |     |     |     |        |         |        |      |      |
| ATOM | 6656 | CG  | LEU | 247 | 19.423 | -87.237 | 28.597 | 1.00 | 0.00 |
| C    |      |     |     |     |        |         |        |      |      |
| ATOM | 6657 | CD1 | LEU | 247 | 18.339 | -87.665 | 29.571 | 1.00 | 0.00 |
| C    |      |     |     |     |        |         |        |      |      |
| ATOM | 6658 | CD2 | LEU | 247 | 19.068 | -85.940 | 27.901 | 1.00 | 0.00 |
| C    |      |     |     |     |        |         |        |      |      |
| ATOM | 6659 | C   | LEU | 247 | 21.563 | -89.667 | 28.904 | 1.00 | 0.00 |
| C    |      |     |     |     |        |         |        |      |      |

|      |      |     |     |     |        |         |        |      |      |
|------|------|-----|-----|-----|--------|---------|--------|------|------|
| ATOM | 6660 | O   | LEU | 247 | 21.985 | -89.529 | 27.781 | 1.00 | 0.00 |
| O    |      |     |     |     |        |         |        |      |      |
| ATOM | 6661 | N   | PRO | 248 | 21.220 | -90.916 | 29.336 | 1.00 | 0.00 |
| N    |      |     |     |     |        |         |        |      |      |
| ATOM | 6662 | CD  | PRO | 248 | 20.834 | -91.166 | 30.680 | 1.00 | 0.00 |
| C    |      |     |     |     |        |         |        |      |      |
| ATOM | 6663 | CG  | PRO | 248 | 20.723 | -92.643 | 30.780 | 1.00 | 0.00 |
| C    |      |     |     |     |        |         |        |      |      |
| ATOM | 6664 | CB  | PRO | 248 | 21.154 | -93.191 | 29.395 | 1.00 | 0.00 |
| C    |      |     |     |     |        |         |        |      |      |
| ATOM | 6665 | CA  | PRO | 248 | 21.117 | -92.005 | 28.429 | 1.00 | 0.00 |
| C    |      |     |     |     |        |         |        |      |      |
| ATOM | 6666 | C   | PRO | 248 | 19.815 | -91.993 | 27.610 | 1.00 | 0.00 |
| C    |      |     |     |     |        |         |        |      |      |
| ATOM | 6667 | O   | PRO | 248 | 18.733 | -91.655 | 28.180 | 1.00 | 0.00 |
| O    |      |     |     |     |        |         |        |      |      |
| ATOM | 6668 | N   | LEU | 249 | 19.862 | -92.327 | 26.288 | 1.00 | 0.00 |
| N    |      |     |     |     |        |         |        |      |      |
| ATOM | 6669 | CA  | LEU | 249 | 18.754 | -92.133 | 25.364 | 1.00 | 0.00 |
| C    |      |     |     |     |        |         |        |      |      |
| ATOM | 6670 | CB  | LEU | 249 | 18.853 | -90.757 | 24.575 | 1.00 | 0.00 |
| C    |      |     |     |     |        |         |        |      |      |
| ATOM | 6671 | CG  | LEU | 249 | 18.584 | -89.563 | 25.416 | 1.00 | 0.00 |
| C    |      |     |     |     |        |         |        |      |      |
| ATOM | 6672 | CD1 | LEU | 249 | 18.871 | -88.291 | 24.582 | 1.00 | 0.00 |
| C    |      |     |     |     |        |         |        |      |      |
| ATOM | 6673 | CD2 | LEU | 249 | 17.207 | -89.391 | 25.970 | 1.00 | 0.00 |
| C    |      |     |     |     |        |         |        |      |      |
| ATOM | 6674 | C   | LEU | 249 | 18.767 | -93.304 | 24.358 | 1.00 | 0.00 |
| C    |      |     |     |     |        |         |        |      |      |
| ATOM | 6675 | O   | LEU | 249 | 19.771 | -93.887 | 23.938 | 1.00 | 0.00 |
| O    |      |     |     |     |        |         |        |      |      |
| ATOM | 6676 | N   | GLN | 250 | 17.510 | -93.640 | 24.008 | 1.00 | 0.00 |
| N    |      |     |     |     |        |         |        |      |      |
| ATOM | 6677 | CA  | GLN | 250 | 17.138 | -94.819 | 23.288 | 1.00 | 0.00 |
| C    |      |     |     |     |        |         |        |      |      |
| ATOM | 6678 | CB  | GLN | 250 | 17.112 | -96.133 | 24.107 | 1.00 | 0.00 |
| C    |      |     |     |     |        |         |        |      |      |
| ATOM | 6679 | CG  | GLN | 250 | 16.688 | -97.375 | 23.300 | 1.00 | 0.00 |
| C    |      |     |     |     |        |         |        |      |      |
| ATOM | 6680 | CD  | GLN | 250 | 17.109 | -98.660 | 24.038 | 1.00 | 0.00 |
| C    |      |     |     |     |        |         |        |      |      |
| ATOM | 6681 | OE1 | GLN | 250 | 18.125 | -98.791 | 24.653 | 1.00 | 0.00 |
| O    |      |     |     |     |        |         |        |      |      |
| ATOM | 6682 | NE2 | GLN | 250 | 16.457 | -99.718 | 23.658 | 1.00 | 0.00 |
| N    |      |     |     |     |        |         |        |      |      |
| ATOM | 6683 | C   | GLN | 250 | 15.919 | -94.553 | 22.345 | 1.00 | 0.00 |
| C    |      |     |     |     |        |         |        |      |      |
| ATOM | 6684 | O   | GLN | 250 | 14.872 | -94.031 | 22.855 | 1.00 | 0.00 |
| O    |      |     |     |     |        |         |        |      |      |
| ATOM | 6685 | N   | LEU | 251 | 16.015 | -94.957 | 21.078 | 1.00 | 0.00 |
| N    |      |     |     |     |        |         |        |      |      |
| ATOM | 6686 | CA  | LEU | 251 | 15.099 | -94.536 | 19.984 | 1.00 | 0.00 |
| C    |      |     |     |     |        |         |        |      |      |

|      |      |     |     |     |        |          |        |      |      |
|------|------|-----|-----|-----|--------|----------|--------|------|------|
| ATOM | 6687 | CB  | LEU | 251 | 15.658 | -93.284  | 19.324 | 1.00 | 0.00 |
| C    |      |     |     |     |        |          |        |      |      |
| ATOM | 6688 | CG  | LEU | 251 | 16.026 | -92.015  | 20.144 | 1.00 | 0.00 |
| C    |      |     |     |     |        |          |        |      |      |
| ATOM | 6689 | CD1 | LEU | 251 | 17.526 | -92.004  | 20.345 | 1.00 | 0.00 |
| C    |      |     |     |     |        |          |        |      |      |
| ATOM | 6690 | CD2 | LEU | 251 | 15.780 | -90.718  | 19.359 | 1.00 | 0.00 |
| C    |      |     |     |     |        |          |        |      |      |
| ATOM | 6691 | C   | LEU | 251 | 14.801 | -95.747  | 19.074 | 1.00 | 0.00 |
| C    |      |     |     |     |        |          |        |      |      |
| ATOM | 6692 | O   | LEU | 251 | 15.740 | -96.403  | 18.665 | 1.00 | 0.00 |
| O    |      |     |     |     |        |          |        |      |      |
| ATOM | 6693 | N   | PHE | 252 | 13.571 | -95.898  | 18.551 | 1.00 | 0.00 |
| N    |      |     |     |     |        |          |        |      |      |
| ATOM | 6694 | CA  | PHE | 252 | 13.094 | -96.957  | 17.649 | 1.00 | 0.00 |
| C    |      |     |     |     |        |          |        |      |      |
| ATOM | 6695 | CB  | PHE | 252 | 12.413 | -98.004  | 18.547 | 1.00 | 0.00 |
| C    |      |     |     |     |        |          |        |      |      |
| ATOM | 6696 | CG  | PHE | 252 | 12.138 | -99.419  | 17.831 | 1.00 | 0.00 |
| C    |      |     |     |     |        |          |        |      |      |
| ATOM | 6697 | CD1 | PHE | 252 | 13.039 | -99.882  | 16.833 | 1.00 | 0.00 |
| C    |      |     |     |     |        |          |        |      |      |
| ATOM | 6698 | CE1 | PHE | 252 | 12.840 | -101.204 | 16.258 | 1.00 | 0.00 |
| C    |      |     |     |     |        |          |        |      |      |
| ATOM | 6699 | CZ  | PHE | 252 | 11.615 | -101.859 | 16.530 | 1.00 | 0.00 |
| C    |      |     |     |     |        |          |        |      |      |
| ATOM | 6700 | CE2 | PHE | 252 | 10.631 | -101.294 | 17.417 | 1.00 | 0.00 |
| C    |      |     |     |     |        |          |        |      |      |
| ATOM | 6701 | CD2 | PHE | 252 | 10.927 | -100.070 | 18.035 | 1.00 | 0.00 |
| C    |      |     |     |     |        |          |        |      |      |
| ATOM | 6702 | C   | PHE | 252 | 12.293 | -96.424  | 16.423 | 1.00 | 0.00 |
| C    |      |     |     |     |        |          |        |      |      |
| ATOM | 6703 | O   | PHE | 252 | 12.400 | -96.999  | 15.389 | 1.00 | 0.00 |
| O    |      |     |     |     |        |          |        |      |      |
| ATOM | 6704 | N   | HIE | 253 | 11.540 | -95.323  | 16.509 | 1.00 | 0.00 |
| N    |      |     |     |     |        |          |        |      |      |
| ATOM | 6705 | CA  | HIE | 253 | 10.685 | -94.789  | 15.432 | 1.00 | 0.00 |
| C    |      |     |     |     |        |          |        |      |      |
| ATOM | 6706 | CB  | HIE | 253 | 9.735  | -93.703  | 15.986 | 1.00 | 0.00 |
| C    |      |     |     |     |        |          |        |      |      |
| ATOM | 6707 | CG  | HIE | 253 | 8.750  | -93.255  | 14.916 | 1.00 | 0.00 |
| C    |      |     |     |     |        |          |        |      |      |
| ATOM | 6708 | ND1 | HIE | 253 | 9.011  | -92.400  | 13.935 | 1.00 | 0.00 |
| N    |      |     |     |     |        |          |        |      |      |
| ATOM | 6709 | CE1 | HIE | 253 | 7.925  | -92.405  | 13.113 | 1.00 | 0.00 |
| C    |      |     |     |     |        |          |        |      |      |
| ATOM | 6710 | NE2 | HIE | 253 | 7.111  | -93.395  | 13.542 | 1.00 | 0.00 |
| N    |      |     |     |     |        |          |        |      |      |
| ATOM | 6711 | CD2 | HIE | 253 | 7.557  | -93.927  | 14.679 | 1.00 | 0.00 |
| C    |      |     |     |     |        |          |        |      |      |
| ATOM | 6712 | C   | HIE | 253 | 11.572 | -94.301  | 14.257 | 1.00 | 0.00 |
| C    |      |     |     |     |        |          |        |      |      |
| ATOM | 6713 | O   | HIE | 253 | 12.476 | -93.486  | 14.480 | 1.00 | 0.00 |
| O    |      |     |     |     |        |          |        |      |      |

|      |      |     |     |     |        |         |        |      |      |
|------|------|-----|-----|-----|--------|---------|--------|------|------|
| ATOM | 6714 | N   | PRO | 254 | 11.415 | -94.742 | 13.024 | 1.00 | 0.00 |
| N    |      |     |     |     |        |         |        |      |      |
| ATOM | 6715 | CD  | PRO | 254 | 10.211 | -95.334 | 12.454 | 1.00 | 0.00 |
| C    |      |     |     |     |        |         |        |      |      |
| ATOM | 6716 | CG  | PRO | 254 | 10.286 | -95.055 | 10.940 | 1.00 | 0.00 |
| C    |      |     |     |     |        |         |        |      |      |
| ATOM | 6717 | CB  | PRO | 254 | 11.736 | -95.045 | 10.638 | 1.00 | 0.00 |
| C    |      |     |     |     |        |         |        |      |      |
| ATOM | 6718 | CA  | PRO | 254 | 12.259 | -94.329 | 11.902 | 1.00 | 0.00 |
| C    |      |     |     |     |        |         |        |      |      |
| ATOM | 6719 | C   | PRO | 254 | 12.502 | -92.838 | 11.629 | 1.00 | 0.00 |
| C    |      |     |     |     |        |         |        |      |      |
| ATOM | 6720 | O   | PRO | 254 | 13.600 | -92.426 | 11.297 | 1.00 | 0.00 |
| O    |      |     |     |     |        |         |        |      |      |
| ATOM | 6721 | N   | GLN | 255 | 11.536 | -91.988 | 11.899 | 1.00 | 0.00 |
| N    |      |     |     |     |        |         |        |      |      |
| ATOM | 6722 | CA  | GLN | 255 | 11.653 | -90.601 | 11.808 | 1.00 | 0.00 |
| C    |      |     |     |     |        |         |        |      |      |
| ATOM | 6723 | CB  | GLN | 255 | 10.301 | -89.910 | 11.904 | 1.00 | 0.00 |
| C    |      |     |     |     |        |         |        |      |      |
| ATOM | 6724 | CG  | GLN | 255 | 10.285 | -88.487 | 11.346 | 1.00 | 0.00 |
| C    |      |     |     |     |        |         |        |      |      |
| ATOM | 6725 | CD  | GLN | 255 | 10.800 | -88.451 | 9.836  | 1.00 | 0.00 |
| C    |      |     |     |     |        |         |        |      |      |
| ATOM | 6726 | OE1 | GLN | 255 | 10.188 | -88.949 | 8.942  | 1.00 | 0.00 |
| O    |      |     |     |     |        |         |        |      |      |
| ATOM | 6727 | NE2 | GLN | 255 | 12.008 | -88.001 | 9.639  | 1.00 | 0.00 |
| N    |      |     |     |     |        |         |        |      |      |
| ATOM | 6728 | C   | GLN | 255 | 12.566 | -89.997 | 12.914 | 1.00 | 0.00 |
| C    |      |     |     |     |        |         |        |      |      |
| ATOM | 6729 | O   | GLN | 255 | 13.317 | -89.053 | 12.704 | 1.00 | 0.00 |
| O    |      |     |     |     |        |         |        |      |      |
| ATOM | 6730 | N   | GLU | 256 | 12.439 | -90.587 | 14.103 | 1.00 | 0.00 |
| N    |      |     |     |     |        |         |        |      |      |
| ATOM | 6731 | CA  | GLU | 256 | 13.135 | -90.143 | 15.306 | 1.00 | 0.00 |
| C    |      |     |     |     |        |         |        |      |      |
| ATOM | 6732 | CB  | GLU | 256 | 12.380 | -90.638 | 16.609 | 1.00 | 0.00 |
| C    |      |     |     |     |        |         |        |      |      |
| ATOM | 6733 | CG  | GLU | 256 | 11.123 | -89.754 | 16.825 | 1.00 | 0.00 |
| C    |      |     |     |     |        |         |        |      |      |
| ATOM | 6734 | CD  | GLU | 256 | 10.361 | -90.215 | 18.093 | 1.00 | 0.00 |
| C    |      |     |     |     |        |         |        |      |      |
| ATOM | 6735 | OE1 | GLU | 256 | 9.204  | -89.764 | 18.353 | 1.00 | 0.00 |
| O    |      |     |     |     |        |         |        |      |      |
| ATOM | 6736 | OE2 | GLU | 256 | 10.800 | -91.085 | 18.899 | 1.00 | 0.00 |
| O1-  |      |     |     |     |        |         |        |      |      |
| ATOM | 6737 | C   | GLU | 256 | 14.547 | -90.688 | 15.167 | 1.00 | 0.00 |
| C    |      |     |     |     |        |         |        |      |      |
| ATOM | 6738 | O   | GLU | 256 | 15.426 | -89.840 | 15.341 | 1.00 | 0.00 |
| O    |      |     |     |     |        |         |        |      |      |
| ATOM | 6739 | N   | VAL | 257 | 14.779 | -91.872 | 14.546 | 1.00 | 0.00 |
| N    |      |     |     |     |        |         |        |      |      |
| ATOM | 6740 | CA  | VAL | 257 | 16.078 | -92.454 | 14.116 | 1.00 | 0.00 |
| C    |      |     |     |     |        |         |        |      |      |

|      |      |     |     |     |        |         |        |      |      |
|------|------|-----|-----|-----|--------|---------|--------|------|------|
| ATOM | 6741 | CB  | VAL | 257 | 15.820 | -93.896 | 13.575 | 1.00 | 0.00 |
| C    |      |     |     |     |        |         |        |      |      |
| ATOM | 6742 | CG1 | VAL | 257 | 17.045 | -94.423 | 12.808 | 1.00 | 0.00 |
| C    |      |     |     |     |        |         |        |      |      |
| ATOM | 6743 | CG2 | VAL | 257 | 15.547 | -94.899 | 14.755 | 1.00 | 0.00 |
| C    |      |     |     |     |        |         |        |      |      |
| ATOM | 6744 | C   | VAL | 257 | 16.729 | -91.534 | 13.128 | 1.00 | 0.00 |
| C    |      |     |     |     |        |         |        |      |      |
| ATOM | 6745 | O   | VAL | 257 | 17.882 | -91.239 | 13.266 | 1.00 | 0.00 |
| O    |      |     |     |     |        |         |        |      |      |
| ATOM | 6746 | N   | SER | 258 | 15.963 | -90.944 | 12.194 | 1.00 | 0.00 |
| N    |      |     |     |     |        |         |        |      |      |
| ATOM | 6747 | CA  | SER | 258 | 16.620 | -90.035 | 11.227 | 1.00 | 0.00 |
| C    |      |     |     |     |        |         |        |      |      |
| ATOM | 6748 | CB  | SER | 258 | 15.730 | -89.781 | 9.966  | 1.00 | 0.00 |
| C    |      |     |     |     |        |         |        |      |      |
| ATOM | 6749 | OG  | SER | 258 | 15.333 | -91.011 | 9.344  | 1.00 | 0.00 |
| O    |      |     |     |     |        |         |        |      |      |
| ATOM | 6750 | C   | SER | 258 | 16.927 | -88.663 | 11.722 | 1.00 | 0.00 |
| C    |      |     |     |     |        |         |        |      |      |
| ATOM | 6751 | O   | SER | 258 | 17.726 | -87.874 | 11.232 | 1.00 | 0.00 |
| O    |      |     |     |     |        |         |        |      |      |
| ATOM | 6752 | N   | MET | 259 | 16.374 | -88.242 | 12.834 | 1.00 | 0.00 |
| N    |      |     |     |     |        |         |        |      |      |
| ATOM | 6753 | CA  | MET | 259 | 16.692 | -86.975 | 13.599 | 1.00 | 0.00 |
| C    |      |     |     |     |        |         |        |      |      |
| ATOM | 6754 | CB  | MET | 259 | 15.453 | -86.712 | 14.471 | 1.00 | 0.00 |
| C    |      |     |     |     |        |         |        |      |      |
| ATOM | 6755 | CG  | MET | 259 | 15.655 | -85.457 | 15.298 | 1.00 | 0.00 |
| C    |      |     |     |     |        |         |        |      |      |
| ATOM | 6756 | SD  | MET | 259 | 16.311 | -85.664 | 16.979 | 1.00 | 0.00 |
| S    |      |     |     |     |        |         |        |      |      |
| ATOM | 6757 | CE  | MET | 259 | 16.034 | -84.005 | 17.687 | 1.00 | 0.00 |
| C    |      |     |     |     |        |         |        |      |      |
| ATOM | 6758 | C   | MET | 259 | 17.954 | -87.155 | 14.411 | 1.00 | 0.00 |
| C    |      |     |     |     |        |         |        |      |      |
| ATOM | 6759 | O   | MET | 259 | 18.849 | -86.330 | 14.187 | 1.00 | 0.00 |
| O    |      |     |     |     |        |         |        |      |      |
| ATOM | 6760 | N   | VAL | 260 | 18.079 | -88.161 | 15.234 | 1.00 | 0.00 |
| N    |      |     |     |     |        |         |        |      |      |
| ATOM | 6761 | CA  | VAL | 260 | 19.336 | -88.403 | 15.975 | 1.00 | 0.00 |
| C    |      |     |     |     |        |         |        |      |      |
| ATOM | 6762 | CB  | VAL | 260 | 19.388 | -89.516 | 17.026 | 1.00 | 0.00 |
| C    |      |     |     |     |        |         |        |      |      |
| ATOM | 6763 | CG1 | VAL | 260 | 18.587 | -89.073 | 18.217 | 1.00 | 0.00 |
| C    |      |     |     |     |        |         |        |      |      |
| ATOM | 6764 | CG2 | VAL | 260 | 18.874 | -90.908 | 16.463 | 1.00 | 0.00 |
| C    |      |     |     |     |        |         |        |      |      |
| ATOM | 6765 | C   | VAL | 260 | 20.513 | -88.644 | 15.017 | 1.00 | 0.00 |
| C    |      |     |     |     |        |         |        |      |      |
| ATOM | 6766 | O   | VAL | 260 | 21.594 | -88.147 | 15.365 | 1.00 | 0.00 |
| O    |      |     |     |     |        |         |        |      |      |
| ATOM | 6767 | N   | ARG | 261 | 20.337 | -89.315 | 13.847 | 1.00 | 0.00 |
| N    |      |     |     |     |        |         |        |      |      |

|      |      |     |     |     |        |         |        |      |      |
|------|------|-----|-----|-----|--------|---------|--------|------|------|
| ATOM | 6768 | CA  | ARG | 261 | 21.390 | -89.321 | 12.701 | 1.00 | 0.00 |
| C    |      |     |     |     |        |         |        |      |      |
| ATOM | 6769 | CB  | ARG | 261 | 20.911 | -90.268 | 11.594 | 1.00 | 0.00 |
| C    |      |     |     |     |        |         |        |      |      |
| ATOM | 6770 | CG  | ARG | 261 | 21.334 | -91.736 | 11.868 | 1.00 | 0.00 |
| C    |      |     |     |     |        |         |        |      |      |
| ATOM | 6771 | CD  | ARG | 261 | 20.590 | -92.570 | 10.828 | 1.00 | 0.00 |
| C    |      |     |     |     |        |         |        |      |      |
| ATOM | 6772 | NE  | ARG | 261 | 20.889 | -94.017 | 10.949 | 1.00 | 0.00 |
| N    |      |     |     |     |        |         |        |      |      |
| ATOM | 6773 | CZ  | ARG | 261 | 20.295 | -94.966 | 10.236 | 1.00 | 0.00 |
| C    |      |     |     |     |        |         |        |      |      |
| ATOM | 6774 | NH1 | ARG | 261 | 19.594 | -94.692 | 9.217  | 1.00 | 0.00 |
| N    |      |     |     |     |        |         |        |      |      |
| ATOM | 6775 | NH2 | ARG | 261 | 20.503 | -96.204 | 10.595 | 1.00 | 0.00 |
| N1+  |      |     |     |     |        |         |        |      |      |
| ATOM | 6776 | C   | ARG | 261 | 21.714 | -87.953 | 12.141 | 1.00 | 0.00 |
| C    |      |     |     |     |        |         |        |      |      |
| ATOM | 6777 | O   | ARG | 261 | 22.913 | -87.740 | 11.913 | 1.00 | 0.00 |
| O    |      |     |     |     |        |         |        |      |      |
| ATOM | 6778 | N   | ASN | 262 | 20.713 | -87.045 | 11.978 | 1.00 | 0.00 |
| N    |      |     |     |     |        |         |        |      |      |
| ATOM | 6779 | CA  | ASN | 262 | 20.949 | -85.704 | 11.383 | 1.00 | 0.00 |
| C    |      |     |     |     |        |         |        |      |      |
| ATOM | 6780 | CB  | ASN | 262 | 19.545 | -85.202 | 10.875 | 1.00 | 0.00 |
| C    |      |     |     |     |        |         |        |      |      |
| ATOM | 6781 | CG  | ASN | 262 | 19.585 | -83.845 | 10.263 | 1.00 | 0.00 |
| C    |      |     |     |     |        |         |        |      |      |
| ATOM | 6782 | OD1 | ASN | 262 | 19.141 | -82.884 | 10.866 | 1.00 | 0.00 |
| O    |      |     |     |     |        |         |        |      |      |
| ATOM | 6783 | ND2 | ASN | 262 | 20.174 | -83.725 | 9.145  | 1.00 | 0.00 |
| N    |      |     |     |     |        |         |        |      |      |
| ATOM | 6784 | C   | ASN | 262 | 21.650 | -84.668 | 12.338 | 1.00 | 0.00 |
| C    |      |     |     |     |        |         |        |      |      |
| ATOM | 6785 | O   | ASN | 262 | 22.494 | -83.875 | 11.995 | 1.00 | 0.00 |
| O    |      |     |     |     |        |         |        |      |      |
| ATOM | 6786 | N   | LEU | 263 | 21.382 | -84.831 | 13.663 | 1.00 | 0.00 |
| N    |      |     |     |     |        |         |        |      |      |
| ATOM | 6787 | CA  | LEU | 263 | 22.121 | -84.172 | 14.775 | 1.00 | 0.00 |
| C    |      |     |     |     |        |         |        |      |      |
| ATOM | 6788 | CB  | LEU | 263 | 21.722 | -84.725 | 16.101 | 1.00 | 0.00 |
| C    |      |     |     |     |        |         |        |      |      |
| ATOM | 6789 | CG  | LEU | 263 | 20.264 | -84.456 | 16.586 | 1.00 | 0.00 |
| C    |      |     |     |     |        |         |        |      |      |
| ATOM | 6790 | CD1 | LEU | 263 | 19.989 | -85.175 | 17.971 | 1.00 | 0.00 |
| C    |      |     |     |     |        |         |        |      |      |
| ATOM | 6791 | CD2 | LEU | 263 | 20.086 | -82.928 | 16.889 | 1.00 | 0.00 |
| C    |      |     |     |     |        |         |        |      |      |
| ATOM | 6792 | C   | LEU | 263 | 23.666 | -84.374 | 14.565 | 1.00 | 0.00 |
| C    |      |     |     |     |        |         |        |      |      |
| ATOM | 6793 | O   | LEU | 263 | 24.444 | -83.449 | 14.397 | 1.00 | 0.00 |
| O    |      |     |     |     |        |         |        |      |      |
| ATOM | 6794 | N   | ILE | 264 | 24.143 | -85.617 | 14.376 | 1.00 | 0.00 |
| N    |      |     |     |     |        |         |        |      |      |

|      |      |     |     |     |        |         |        |      |      |
|------|------|-----|-----|-----|--------|---------|--------|------|------|
| ATOM | 6795 | CA  | ILE | 264 | 25.537 | -85.958 | 14.035 | 1.00 | 0.00 |
| C    |      |     |     |     |        |         |        |      |      |
| ATOM | 6796 | CB  | ILE | 264 | 25.778 | -87.460 | 14.161 | 1.00 | 0.00 |
| C    |      |     |     |     |        |         |        |      |      |
| ATOM | 6797 | CG2 | ILE | 264 | 27.214 | -87.843 | 13.875 | 1.00 | 0.00 |
| C    |      |     |     |     |        |         |        |      |      |
| ATOM | 6798 | CG1 | ILE | 264 | 25.377 | -87.895 | 15.587 | 1.00 | 0.00 |
| C    |      |     |     |     |        |         |        |      |      |
| ATOM | 6799 | CD1 | ILE | 264 | 25.345 | -89.509 | 15.836 | 1.00 | 0.00 |
| C    |      |     |     |     |        |         |        |      |      |
| ATOM | 6800 | C   | ILE | 264 | 26.038 | -85.290 | 12.726 | 1.00 | 0.00 |
| C    |      |     |     |     |        |         |        |      |      |
| ATOM | 6801 | O   | ILE | 264 | 27.234 | -85.024 | 12.650 | 1.00 | 0.00 |
| O    |      |     |     |     |        |         |        |      |      |
| ATOM | 6802 | N   | GLN | 265 | 25.105 | -85.124 | 11.726 | 1.00 | 0.00 |
| N    |      |     |     |     |        |         |        |      |      |
| ATOM | 6803 | CA  | GLN | 265 | 25.552 | -84.537 | 10.405 | 1.00 | 0.00 |
| C    |      |     |     |     |        |         |        |      |      |
| ATOM | 6804 | CB  | GLN | 265 | 24.681 | -84.934 | 9.187  | 1.00 | 0.00 |
| C    |      |     |     |     |        |         |        |      |      |
| ATOM | 6805 | CG  | GLN | 265 | 24.618 | -86.462 | 8.987  | 1.00 | 0.00 |
| C    |      |     |     |     |        |         |        |      |      |
| ATOM | 6806 | CD  | GLN | 265 | 23.346 | -86.926 | 8.142  | 1.00 | 0.00 |
| C    |      |     |     |     |        |         |        |      |      |
| ATOM | 6807 | OE1 | GLN | 265 | 22.170 | -86.867 | 8.508  | 1.00 | 0.00 |
| O    |      |     |     |     |        |         |        |      |      |
| ATOM | 6808 | NE2 | GLN | 265 | 23.663 | -87.290 | 6.906  | 1.00 | 0.00 |
| N    |      |     |     |     |        |         |        |      |      |
| ATOM | 6809 | C   | GLN | 265 | 25.686 | -83.037 | 10.427 | 1.00 | 0.00 |
| C    |      |     |     |     |        |         |        |      |      |
| ATOM | 6810 | O   | GLN | 265 | 26.117 | -82.482 | 9.383  | 1.00 | 0.00 |
| O    |      |     |     |     |        |         |        |      |      |
| ATOM | 6811 | N   | LYS | 266 | 25.356 | -82.377 | 11.545 | 1.00 | 0.00 |
| N    |      |     |     |     |        |         |        |      |      |
| ATOM | 6812 | CA  | LYS | 266 | 25.405 | -80.891 | 11.691 | 1.00 | 0.00 |
| C    |      |     |     |     |        |         |        |      |      |
| ATOM | 6813 | CB  | LYS | 266 | 23.985 | -80.339 | 11.912 | 1.00 | 0.00 |
| C    |      |     |     |     |        |         |        |      |      |
| ATOM | 6814 | CG  | LYS | 266 | 22.964 | -80.704 | 10.808 | 1.00 | 0.00 |
| C    |      |     |     |     |        |         |        |      |      |
| ATOM | 6815 | CD  | LYS | 266 | 21.506 | -80.475 | 11.094 | 1.00 | 0.00 |
| C    |      |     |     |     |        |         |        |      |      |
| ATOM | 6816 | CE  | LYS | 266 | 20.982 | -80.845 | 12.506 | 1.00 | 0.00 |
| C    |      |     |     |     |        |         |        |      |      |
| ATOM | 6817 | NZ  | LYS | 266 | 19.531 | -80.725 | 12.645 | 1.00 | 0.00 |
| N1+  |      |     |     |     |        |         |        |      |      |
| ATOM | 6818 | C   | LYS | 266 | 26.332 | -80.589 | 12.868 | 1.00 | 0.00 |
| C    |      |     |     |     |        |         |        |      |      |
| ATOM | 6819 | O   | LYS | 266 | 27.543 | -80.372 | 12.625 | 1.00 | 0.00 |
| O    |      |     |     |     |        |         |        |      |      |
| ATOM | 6820 | N   | ASP | 267 | 25.897 | -80.770 | 14.162 | 1.00 | 0.00 |
| N    |      |     |     |     |        |         |        |      |      |
| ATOM | 6821 | CA  | ASP | 267 | 26.731 | -80.394 | 15.300 | 1.00 | 0.00 |
| C    |      |     |     |     |        |         |        |      |      |



|      |      |     |     |     |        |         |        |      |      |
|------|------|-----|-----|-----|--------|---------|--------|------|------|
| ATOM | 6822 | CB  | ASP | 267 | 26.557 | -78.874 | 15.503 | 1.00 | 0.00 |
| C    |      |     |     |     |        |         |        |      |      |
| ATOM | 6823 | CG  | ASP | 267 | 25.128 | -78.391 | 15.842 | 1.00 | 0.00 |
| C    |      |     |     |     |        |         |        |      |      |
| ATOM | 6824 | OD1 | ASP | 267 | 24.247 | -79.180 | 16.267 | 1.00 | 0.00 |
| O    |      |     |     |     |        |         |        |      |      |
| ATOM | 6825 | OD2 | ASP | 267 | 24.952 | -77.145 | 15.702 | 1.00 | 0.00 |
| O1-  |      |     |     |     |        |         |        |      |      |
| ATOM | 6826 | C   | ASP | 267 | 26.470 | -81.146 | 16.600 | 1.00 | 0.00 |
| C    |      |     |     |     |        |         |        |      |      |
| ATOM | 6827 | O   | ASP | 267 | 26.802 | -80.622 | 17.688 | 1.00 | 0.00 |
| O    |      |     |     |     |        |         |        |      |      |
| ATOM | 6828 | N   | ARG | 268 | 25.758 | -82.302 | 16.542 | 1.00 | 0.00 |
| N    |      |     |     |     |        |         |        |      |      |
| ATOM | 6829 | CA  | ARG | 268 | 25.430 | -83.188 | 17.738 | 1.00 | 0.00 |
| C    |      |     |     |     |        |         |        |      |      |
| ATOM | 6830 | CB  | ARG | 268 | 26.670 | -83.866 | 18.440 | 1.00 | 0.00 |
| C    |      |     |     |     |        |         |        |      |      |
| ATOM | 6831 | CG  | ARG | 268 | 27.460 | -84.755 | 17.457 | 1.00 | 0.00 |
| C    |      |     |     |     |        |         |        |      |      |
| ATOM | 6832 | CD  | ARG | 268 | 28.585 | -85.520 | 18.191 | 1.00 | 0.00 |
| C    |      |     |     |     |        |         |        |      |      |
| ATOM | 6833 | NE  | ARG | 268 | 29.722 | -84.625 | 18.268 | 1.00 | 0.00 |
| N    |      |     |     |     |        |         |        |      |      |
| ATOM | 6834 | CZ  | ARG | 268 | 30.504 | -84.214 | 19.196 | 1.00 | 0.00 |
| C    |      |     |     |     |        |         |        |      |      |
| ATOM | 6835 | NH1 | ARG | 268 | 30.170 | -84.488 | 20.438 | 1.00 | 0.00 |
| N    |      |     |     |     |        |         |        |      |      |
| ATOM | 6836 | NH2 | ARG | 268 | 31.606 | -83.573 | 18.988 | 1.00 | 0.00 |
| N1+  |      |     |     |     |        |         |        |      |      |
| ATOM | 6837 | C   | ARG | 268 | 24.519 | -82.575 | 18.856 | 1.00 | 0.00 |
| C    |      |     |     |     |        |         |        |      |      |
| ATOM | 6838 | O   | ARG | 268 | 24.188 | -83.295 | 19.800 | 1.00 | 0.00 |
| O    |      |     |     |     |        |         |        |      |      |
| ATOM | 6839 | N   | THR | 269 | 24.191 | -81.294 | 18.820 | 1.00 | 0.00 |
| N    |      |     |     |     |        |         |        |      |      |
| ATOM | 6840 | CA  | THR | 269 | 23.572 | -80.543 | 19.881 | 1.00 | 0.00 |
| C    |      |     |     |     |        |         |        |      |      |
| ATOM | 6841 | CB  | THR | 269 | 24.170 | -79.108 | 19.903 | 1.00 | 0.00 |
| C    |      |     |     |     |        |         |        |      |      |
| ATOM | 6842 | CG2 | THR | 269 | 23.347 | -78.179 | 20.887 | 1.00 | 0.00 |
| C    |      |     |     |     |        |         |        |      |      |
| ATOM | 6843 | OG1 | THR | 269 | 25.536 | -79.253 | 20.236 | 1.00 | 0.00 |
| O    |      |     |     |     |        |         |        |      |      |
| ATOM | 6844 | C   | THR | 269 | 22.017 | -80.479 | 19.635 | 1.00 | 0.00 |
| C    |      |     |     |     |        |         |        |      |      |
| ATOM | 6845 | O   | THR | 269 | 21.516 | -80.278 | 18.537 | 1.00 | 0.00 |
| O    |      |     |     |     |        |         |        |      |      |
| ATOM | 6846 | N   | PHE | 270 | 21.215 | -80.654 | 20.738 | 1.00 | 0.00 |
| N    |      |     |     |     |        |         |        |      |      |
| ATOM | 6847 | CA  | PHE | 270 | 19.741 | -80.533 | 20.747 | 1.00 | 0.00 |
| C    |      |     |     |     |        |         |        |      |      |
| ATOM | 6848 | CB  | PHE | 270 | 19.267 | -81.986 | 20.678 | 1.00 | 0.00 |
| C    |      |     |     |     |        |         |        |      |      |

|      |      |     |     |     |        |         |        |      |      |
|------|------|-----|-----|-----|--------|---------|--------|------|------|
| ATOM | 6849 | CG  | PHE | 270 | 19.758 | -82.834 | 21.826 | 1.00 | 0.00 |
| C    |      |     |     |     |        |         |        |      |      |
| ATOM | 6850 | CD1 | PHE | 270 | 20.935 | -83.676 | 21.584 | 1.00 | 0.00 |
| C    |      |     |     |     |        |         |        |      |      |
| ATOM | 6851 | CE1 | PHE | 270 | 21.370 | -84.533 | 22.567 | 1.00 | 0.00 |
| C    |      |     |     |     |        |         |        |      |      |
| ATOM | 6852 | CZ  | PHE | 270 | 20.633 | -84.668 | 23.814 | 1.00 | 0.00 |
| C    |      |     |     |     |        |         |        |      |      |
| ATOM | 6853 | CE2 | PHE | 270 | 19.536 | -83.909 | 24.023 | 1.00 | 0.00 |
| C    |      |     |     |     |        |         |        |      |      |
| ATOM | 6854 | CD2 | PHE | 270 | 19.104 | -83.048 | 23.017 | 1.00 | 0.00 |
| C    |      |     |     |     |        |         |        |      |      |
| ATOM | 6855 | C   | PHE | 270 | 19.238 | -79.835 | 22.028 | 1.00 | 0.00 |
| C    |      |     |     |     |        |         |        |      |      |
| ATOM | 6856 | O   | PHE | 270 | 20.068 | -79.328 | 22.798 | 1.00 | 0.00 |
| O    |      |     |     |     |        |         |        |      |      |
| ATOM | 6857 | N   | ALA | 271 | 17.911 | -79.767 | 22.232 | 1.00 | 0.00 |
| N    |      |     |     |     |        |         |        |      |      |
| ATOM | 6858 | CA  | ALA | 271 | 17.286 | -79.193 | 23.446 | 1.00 | 0.00 |
| C    |      |     |     |     |        |         |        |      |      |
| ATOM | 6859 | CB  | ALA | 271 | 16.672 | -77.776 | 23.212 | 1.00 | 0.00 |
| C    |      |     |     |     |        |         |        |      |      |
| ATOM | 6860 | C   | ALA | 271 | 16.212 | -80.048 | 24.131 | 1.00 | 0.00 |
| C    |      |     |     |     |        |         |        |      |      |
| ATOM | 6861 | O   | ALA | 271 | 15.472 | -80.789 | 23.522 | 1.00 | 0.00 |
| O    |      |     |     |     |        |         |        |      |      |
| ATOM | 6862 | N   | VAL | 272 | 16.231 | -79.895 | 25.464 | 1.00 | 0.00 |
| N    |      |     |     |     |        |         |        |      |      |
| ATOM | 6863 | CA  | VAL | 272 | 15.157 | -80.267 | 26.356 | 1.00 | 0.00 |
| C    |      |     |     |     |        |         |        |      |      |
| ATOM | 6864 | CB  | VAL | 272 | 15.684 | -81.253 | 27.437 | 1.00 | 0.00 |
| C    |      |     |     |     |        |         |        |      |      |
| ATOM | 6865 | CG1 | VAL | 272 | 14.515 | -81.718 | 28.251 | 1.00 | 0.00 |
| C    |      |     |     |     |        |         |        |      |      |
| ATOM | 6866 | CG2 | VAL | 272 | 16.362 | -82.466 | 26.827 | 1.00 | 0.00 |
| C    |      |     |     |     |        |         |        |      |      |
| ATOM | 6867 | C   | VAL | 272 | 14.470 | -78.997 | 26.945 | 1.00 | 0.00 |
| C    |      |     |     |     |        |         |        |      |      |
| ATOM | 6868 | O   | VAL | 272 | 15.153 | -78.155 | 27.501 | 1.00 | 0.00 |
| O    |      |     |     |     |        |         |        |      |      |
| ATOM | 6869 | N   | LEU | 273 | 13.214 | -78.826 | 26.662 | 1.00 | 0.00 |
| N    |      |     |     |     |        |         |        |      |      |
| ATOM | 6870 | CA  | LEU | 273 | 12.300 | -77.725 | 27.174 | 1.00 | 0.00 |
| C    |      |     |     |     |        |         |        |      |      |
| ATOM | 6871 | CB  | LEU | 273 | 10.965 | -77.707 | 26.345 | 1.00 | 0.00 |
| C    |      |     |     |     |        |         |        |      |      |
| ATOM | 6872 | CG  | LEU | 273 | 11.316 | -77.295 | 24.867 | 1.00 | 0.00 |
| C    |      |     |     |     |        |         |        |      |      |
| ATOM | 6873 | CD1 | LEU | 273 | 10.002 | -77.117 | 24.025 | 1.00 | 0.00 |
| C    |      |     |     |     |        |         |        |      |      |
| ATOM | 6874 | CD2 | LEU | 273 | 11.964 | -75.934 | 24.827 | 1.00 | 0.00 |
| C    |      |     |     |     |        |         |        |      |      |
| ATOM | 6875 | C   | LEU | 273 | 12.069 | -77.838 | 28.728 | 1.00 | 0.00 |
| C    |      |     |     |     |        |         |        |      |      |

|      |      |     |     |     |        |         |        |      |      |
|------|------|-----|-----|-----|--------|---------|--------|------|------|
| ATOM | 6876 | O   | LEU | 273 | 12.512 | -78.778 | 29.383 | 1.00 | 0.00 |
| O    |      |     |     |     |        |         |        |      |      |
| ATOM | 6877 | N   | ALA | 274 | 11.275 | -76.972 | 29.344 | 1.00 | 0.00 |
| N    |      |     |     |     |        |         |        |      |      |
| ATOM | 6878 | CA  | ALA | 274 | 10.905 | -76.923 | 30.772 | 1.00 | 0.00 |
| C    |      |     |     |     |        |         |        |      |      |
| ATOM | 6879 | CB  | ALA | 274 | 11.971 | -76.131 | 31.593 | 1.00 | 0.00 |
| C    |      |     |     |     |        |         |        |      |      |
| ATOM | 6880 | C   | ALA | 274 | 9.554  | -76.308 | 30.910 | 1.00 | 0.00 |
| C    |      |     |     |     |        |         |        |      |      |
| ATOM | 6881 | O   | ALA | 274 | 9.277  | -75.263 | 30.433 | 1.00 | 0.00 |
| O    |      |     |     |     |        |         |        |      |      |
| ATOM | 6882 | N   | TYR | 275 | 8.705  | -77.012 | 31.651 | 1.00 | 0.00 |
| N    |      |     |     |     |        |         |        |      |      |
| ATOM | 6883 | CA  | TYR | 275 | 7.315  | -76.669 | 31.934 | 1.00 | 0.00 |
| C    |      |     |     |     |        |         |        |      |      |
| ATOM | 6884 | CB  | TYR | 275 | 6.474  | -77.980 | 32.103 | 1.00 | 0.00 |
| C    |      |     |     |     |        |         |        |      |      |
| ATOM | 6885 | CG  | TYR | 275 | 6.412  | -78.952 | 30.933 | 1.00 | 0.00 |
| C    |      |     |     |     |        |         |        |      |      |
| ATOM | 6886 | CD1 | TYR | 275 | 6.618  | -78.594 | 29.591 | 1.00 | 0.00 |
| C    |      |     |     |     |        |         |        |      |      |
| ATOM | 6887 | CE1 | TYR | 275 | 6.866  | -79.588 | 28.654 | 1.00 | 0.00 |
| C    |      |     |     |     |        |         |        |      |      |
| ATOM | 6888 | CZ  | TYR | 275 | 6.782  | -80.942 | 29.026 | 1.00 | 0.00 |
| C    |      |     |     |     |        |         |        |      |      |
| ATOM | 6889 | OH  | TYR | 275 | 7.232  | -81.785 | 28.045 | 1.00 | 0.00 |
| O    |      |     |     |     |        |         |        |      |      |
| ATOM | 6890 | CE2 | TYR | 275 | 6.274  | -81.287 | 30.252 | 1.00 | 0.00 |
| C    |      |     |     |     |        |         |        |      |      |
| ATOM | 6891 | CD2 | TYR | 275 | 6.142  | -80.336 | 31.256 | 1.00 | 0.00 |
| C    |      |     |     |     |        |         |        |      |      |
| ATOM | 6892 | C   | TYR | 275 | 7.257  | -75.701 | 33.115 | 1.00 | 0.00 |
| C    |      |     |     |     |        |         |        |      |      |
| ATOM | 6893 | O   | TYR | 275 | 7.906  | -75.996 | 34.093 | 1.00 | 0.00 |
| O    |      |     |     |     |        |         |        |      |      |
| ATOM | 6894 | N   | SER | 276 | 6.408  | -74.690 | 33.128 | 1.00 | 0.00 |
| N    |      |     |     |     |        |         |        |      |      |
| ATOM | 6895 | CA  | SER | 276 | 6.161  | -73.717 | 34.200 | 1.00 | 0.00 |
| C    |      |     |     |     |        |         |        |      |      |
| ATOM | 6896 | CB  | SER | 276 | 5.222  | -72.603 | 33.617 | 1.00 | 0.00 |
| C    |      |     |     |     |        |         |        |      |      |
| ATOM | 6897 | OG  | SER | 276 | 5.189  | -71.475 | 34.493 | 1.00 | 0.00 |
| O    |      |     |     |     |        |         |        |      |      |
| ATOM | 6898 | C   | SER | 276 | 5.558  | -74.336 | 35.423 | 1.00 | 0.00 |
| C    |      |     |     |     |        |         |        |      |      |
| ATOM | 6899 | O   | SER | 276 | 4.916  | -75.420 | 35.439 | 1.00 | 0.00 |
| O    |      |     |     |     |        |         |        |      |      |
| ATOM | 6900 | N   | ASN | 277 | 5.784  | -73.712 | 36.563 | 1.00 | 0.00 |
| N    |      |     |     |     |        |         |        |      |      |
| ATOM | 6901 | CA  | ASN | 277 | 5.307  | -74.271 | 37.887 | 1.00 | 0.00 |
| C    |      |     |     |     |        |         |        |      |      |
| ATOM | 6902 | CB  | ASN | 277 | 6.015  | -73.500 | 39.028 | 1.00 | 0.00 |
| C    |      |     |     |     |        |         |        |      |      |

|      |      |     |     |     |        |         |        |      |      |
|------|------|-----|-----|-----|--------|---------|--------|------|------|
| ATOM | 6903 | CG  | ASN | 277 | 5.994  | -71.928 | 38.836 | 1.00 | 0.00 |
| C    |      |     |     |     |        |         |        |      |      |
| ATOM | 6904 | OD1 | ASN | 277 | 6.755  | -71.379 | 38.021 | 1.00 | 0.00 |
| O    |      |     |     |     |        |         |        |      |      |
| ATOM | 6905 | ND2 | ASN | 277 | 5.052  | -71.223 | 39.361 | 1.00 | 0.00 |
| N    |      |     |     |     |        |         |        |      |      |
| ATOM | 6906 | C   | ASN | 277 | 3.812  | -74.154 | 38.038 | 1.00 | 0.00 |
| C    |      |     |     |     |        |         |        |      |      |
| ATOM | 6907 | O   | ASN | 277 | 3.141  | -75.042 | 38.565 | 1.00 | 0.00 |
| O    |      |     |     |     |        |         |        |      |      |
| ATOM | 6908 | N   | VAL | 278 | 3.202  | -73.090 | 37.521 | 1.00 | 0.00 |
| N    |      |     |     |     |        |         |        |      |      |
| ATOM | 6909 | CA  | VAL | 278 | 1.744  | -72.938 | 37.566 | 1.00 | 0.00 |
| C    |      |     |     |     |        |         |        |      |      |
| ATOM | 6910 | CB  | VAL | 278 | 1.261  | -71.541 | 37.130 | 1.00 | 0.00 |
| C    |      |     |     |     |        |         |        |      |      |
| ATOM | 6911 | CG1 | VAL | 278 | 1.702  | -70.435 | 38.078 | 1.00 | 0.00 |
| C    |      |     |     |     |        |         |        |      |      |
| ATOM | 6912 | CG2 | VAL | 278 | 1.651  | -71.088 | 35.701 | 1.00 | 0.00 |
| C    |      |     |     |     |        |         |        |      |      |
| ATOM | 6913 | C   | VAL | 278 | 1.068  | -73.987 | 36.681 | 1.00 | 0.00 |
| C    |      |     |     |     |        |         |        |      |      |
| ATOM | 6914 | O   | VAL | 278 | 1.626  | -74.520 | 35.748 | 1.00 | 0.00 |
| O    |      |     |     |     |        |         |        |      |      |
| ATOM | 6915 | N   | GLN | 279 | -0.236 | -74.249 | 36.856 | 1.00 | 0.00 |
| N    |      |     |     |     |        |         |        |      |      |
| ATOM | 6916 | CA  | GLN | 279 | -0.983 | -75.381 | 36.255 | 1.00 | 0.00 |
| C    |      |     |     |     |        |         |        |      |      |
| ATOM | 6917 | CB  | GLN | 279 | -2.411 | -75.577 | 36.881 | 1.00 | 0.00 |
| C    |      |     |     |     |        |         |        |      |      |
| ATOM | 6918 | CG  | GLN | 279 | -3.312 | -74.456 | 36.457 | 1.00 | 0.00 |
| C    |      |     |     |     |        |         |        |      |      |
| ATOM | 6919 | CD  | GLN | 279 | -4.280 | -74.956 | 35.369 | 1.00 | 0.00 |
| C    |      |     |     |     |        |         |        |      |      |
| ATOM | 6920 | OE1 | GLN | 279 | -4.753 | -76.098 | 35.327 | 1.00 | 0.00 |
| O    |      |     |     |     |        |         |        |      |      |
| ATOM | 6921 | NE2 | GLN | 279 | -4.698 | -74.071 | 34.525 | 1.00 | 0.00 |
| N    |      |     |     |     |        |         |        |      |      |
| ATOM | 6922 | C   | GLN | 279 | -1.066 | -75.291 | 34.710 | 1.00 | 0.00 |
| C    |      |     |     |     |        |         |        |      |      |
| ATOM | 6923 | O   | GLN | 279 | -1.399 | -76.249 | 34.028 | 1.00 | 0.00 |
| O    |      |     |     |     |        |         |        |      |      |
| ATOM | 6924 | N   | GLU | 280 | -0.754 | -74.130 | 34.139 | 1.00 | 0.00 |
| N    |      |     |     |     |        |         |        |      |      |
| ATOM | 6925 | CA  | GLU | 280 | -0.648 | -73.904 | 32.603 | 1.00 | 0.00 |
| C    |      |     |     |     |        |         |        |      |      |
| ATOM | 6926 | CB  | GLU | 280 | -0.516 | -72.390 | 32.345 | 1.00 | 0.00 |
| C    |      |     |     |     |        |         |        |      |      |
| ATOM | 6927 | CG  | GLU | 280 | -1.515 | -71.469 | 33.080 | 1.00 | 0.00 |
| C    |      |     |     |     |        |         |        |      |      |
| ATOM | 6928 | CD  | GLU | 280 | -2.992 | -71.841 | 33.058 | 1.00 | 0.00 |
| C    |      |     |     |     |        |         |        |      |      |
| ATOM | 6929 | OE1 | GLU | 280 | -3.622 | -71.536 | 34.075 | 1.00 | 0.00 |
| O    |      |     |     |     |        |         |        |      |      |

|      |      |     |     |     |        |         |        |      |      |
|------|------|-----|-----|-----|--------|---------|--------|------|------|
| ATOM | 6930 | OE2 | GLU | 280 | -3.481 | -72.281 | 31.964 | 1.00 | 0.00 |
| O1-  |      |     |     |     |        |         |        |      |      |
| ATOM | 6931 | C   | GLU | 280 | 0.462  | -74.746 | 31.977 | 1.00 | 0.00 |
| C    |      |     |     |     |        |         |        |      |      |
| ATOM | 6932 | O   | GLU | 280 | 0.538  | -74.768 | 30.737 | 1.00 | 0.00 |
| O    |      |     |     |     |        |         |        |      |      |
| ATOM | 6933 | N   | ARG | 281 | 1.365  | -75.293 | 32.809 | 1.00 | 0.00 |
| N    |      |     |     |     |        |         |        |      |      |
| ATOM | 6934 | CA  | ARG | 281 | 2.642  | -76.041 | 32.541 | 1.00 | 0.00 |
| C    |      |     |     |     |        |         |        |      |      |
| ATOM | 6935 | CB  | ARG | 281 | 2.282  | -77.603 | 32.649 | 1.00 | 0.00 |
| C    |      |     |     |     |        |         |        |      |      |
| ATOM | 6936 | CG  | ARG | 281 | 1.827  | -78.034 | 34.072 | 1.00 | 0.00 |
| C    |      |     |     |     |        |         |        |      |      |
| ATOM | 6937 | CD  | ARG | 281 | 2.731  | -77.667 | 35.257 | 1.00 | 0.00 |
| C    |      |     |     |     |        |         |        |      |      |
| ATOM | 6938 | NE  | ARG | 281 | 4.114  | -78.197 | 35.296 | 1.00 | 0.00 |
| N    |      |     |     |     |        |         |        |      |      |
| ATOM | 6939 | CZ  | ARG | 281 | 4.510  | -79.520 | 35.227 | 1.00 | 0.00 |
| C    |      |     |     |     |        |         |        |      |      |
| ATOM | 6940 | NH1 | ARG | 281 | 3.598  | -80.453 | 35.241 | 1.00 | 0.00 |
| N    |      |     |     |     |        |         |        |      |      |
| ATOM | 6941 | NH2 | ARG | 281 | 5.750  | -79.893 | 35.224 | 1.00 | 0.00 |
| N1+  |      |     |     |     |        |         |        |      |      |
| ATOM | 6942 | C   | ARG | 281 | 3.332  | -75.627 | 31.219 | 1.00 | 0.00 |
| C    |      |     |     |     |        |         |        |      |      |
| ATOM | 6943 | O   | ARG | 281 | 3.833  | -76.449 | 30.564 | 1.00 | 0.00 |
| O    |      |     |     |     |        |         |        |      |      |
| ATOM | 6944 | N   | GLU | 282 | 3.385  | -74.340 | 30.992 | 1.00 | 0.00 |
| N    |      |     |     |     |        |         |        |      |      |
| ATOM | 6945 | CA  | GLU | 282 | 3.782  | -73.827 | 29.710 | 1.00 | 0.00 |
| C    |      |     |     |     |        |         |        |      |      |
| ATOM | 6946 | CB  | GLU | 282 | 3.169  | -72.488 | 29.384 | 1.00 | 0.00 |
| C    |      |     |     |     |        |         |        |      |      |
| ATOM | 6947 | CG  | GLU | 282 | 3.744  | -71.496 | 30.360 | 1.00 | 0.00 |
| C    |      |     |     |     |        |         |        |      |      |
| ATOM | 6948 | CD  | GLU | 282 | 3.137  | -70.154 | 30.059 | 1.00 | 0.00 |
| C    |      |     |     |     |        |         |        |      |      |
| ATOM | 6949 | OE1 | GLU | 282 | 2.782  | -69.469 | 31.042 | 1.00 | 0.00 |
| O    |      |     |     |     |        |         |        |      |      |
| ATOM | 6950 | OE2 | GLU | 282 | 2.952  | -69.792 | 28.892 | 1.00 | 0.00 |
| O1-  |      |     |     |     |        |         |        |      |      |
| ATOM | 6951 | C   | GLU | 282 | 5.308  | -73.916 | 29.381 | 1.00 | 0.00 |
| C    |      |     |     |     |        |         |        |      |      |
| ATOM | 6952 | O   | GLU | 282 | 6.055  | -73.954 | 30.367 | 1.00 | 0.00 |
| O    |      |     |     |     |        |         |        |      |      |
| ATOM | 6953 | N   | ALA | 283 | 5.630  | -74.025 | 28.074 | 1.00 | 0.00 |
| N    |      |     |     |     |        |         |        |      |      |
| ATOM | 6954 | CA  | ALA | 283 | 7.042  | -74.279 | 27.621 | 1.00 | 0.00 |
| C    |      |     |     |     |        |         |        |      |      |
| ATOM | 6955 | CB  | ALA | 283 | 7.082  | -75.346 | 26.587 | 1.00 | 0.00 |
| C    |      |     |     |     |        |         |        |      |      |
| ATOM | 6956 | C   | ALA | 283 | 7.682  | -72.932 | 27.174 | 1.00 | 0.00 |
| C    |      |     |     |     |        |         |        |      |      |

|      |      |     |     |     |        |         |        |      |      |
|------|------|-----|-----|-----|--------|---------|--------|------|------|
| ATOM | 6957 | O   | ALA | 283 | 7.549  | -72.401 | 26.029 | 1.00 | 0.00 |
| O    |      |     |     |     |        |         |        |      |      |
| ATOM | 6958 | N   | GLN | 284 | 8.383  | -72.326 | 28.131 | 1.00 | 0.00 |
| N    |      |     |     |     |        |         |        |      |      |
| ATOM | 6959 | CA  | GLN | 284 | 8.906  | -70.952 | 28.134 | 1.00 | 0.00 |
| C    |      |     |     |     |        |         |        |      |      |
| ATOM | 6960 | CB  | GLN | 284 | 8.043  | -70.078 | 29.089 | 1.00 | 0.00 |
| C    |      |     |     |     |        |         |        |      |      |
| ATOM | 6961 | CG  | GLN | 284 | 6.656  | -69.926 | 28.682 | 1.00 | 0.00 |
| C    |      |     |     |     |        |         |        |      |      |
| ATOM | 6962 | CD  | GLN | 284 | 6.496  | -68.919 | 27.583 | 1.00 | 0.00 |
| C    |      |     |     |     |        |         |        |      |      |
| ATOM | 6963 | OE1 | GLN | 284 | 7.449  | -68.337 | 27.045 | 1.00 | 0.00 |
| O    |      |     |     |     |        |         |        |      |      |
| ATOM | 6964 | NE2 | GLN | 284 | 5.355  | -68.776 | 27.023 | 1.00 | 0.00 |
| N    |      |     |     |     |        |         |        |      |      |
| ATOM | 6965 | C   | GLN | 284 | 10.413 | -70.849 | 28.462 | 1.00 | 0.00 |
| C    |      |     |     |     |        |         |        |      |      |
| ATOM | 6966 | O   | GLN | 284 | 11.001 | -69.846 | 28.108 | 1.00 | 0.00 |
| O    |      |     |     |     |        |         |        |      |      |
| ATOM | 6967 | N   | PHE | 285 | 11.074 | -71.951 | 29.009 | 1.00 | 0.00 |
| N    |      |     |     |     |        |         |        |      |      |
| ATOM | 6968 | CA  | PHE | 285 | 12.524 | -72.069 | 29.220 | 1.00 | 0.00 |
| C    |      |     |     |     |        |         |        |      |      |
| ATOM | 6969 | CB  | PHE | 285 | 12.799 | -71.756 | 30.682 | 1.00 | 0.00 |
| C    |      |     |     |     |        |         |        |      |      |
| ATOM | 6970 | CG  | PHE | 285 | 12.179 | -70.420 | 31.035 | 1.00 | 0.00 |
| C    |      |     |     |     |        |         |        |      |      |
| ATOM | 6971 | CD1 | PHE | 285 | 12.972 | -69.258 | 30.802 | 1.00 | 0.00 |
| C    |      |     |     |     |        |         |        |      |      |
| ATOM | 6972 | CE1 | PHE | 285 | 12.397 | -67.988 | 31.025 | 1.00 | 0.00 |
| C    |      |     |     |     |        |         |        |      |      |
| ATOM | 6973 | CZ  | PHE | 285 | 11.083 | -67.884 | 31.538 | 1.00 | 0.00 |
| C    |      |     |     |     |        |         |        |      |      |
| ATOM | 6974 | CE2 | PHE | 285 | 10.278 | -68.984 | 31.765 | 1.00 | 0.00 |
| C    |      |     |     |     |        |         |        |      |      |
| ATOM | 6975 | CD2 | PHE | 285 | 10.831 | -70.246 | 31.527 | 1.00 | 0.00 |
| C    |      |     |     |     |        |         |        |      |      |
| ATOM | 6976 | C   | PHE | 285 | 13.048 | -73.457 | 28.846 | 1.00 | 0.00 |
| C    |      |     |     |     |        |         |        |      |      |
| ATOM | 6977 | O   | PHE | 285 | 12.255 | -74.356 | 28.568 | 1.00 | 0.00 |
| O    |      |     |     |     |        |         |        |      |      |
| ATOM | 6978 | N   | GLY | 286 | 14.342 | -73.695 | 28.954 | 1.00 | 0.00 |
| N    |      |     |     |     |        |         |        |      |      |
| ATOM | 6979 | CA  | GLY | 286 | 14.926 | -75.045 | 28.789 | 1.00 | 0.00 |
| C    |      |     |     |     |        |         |        |      |      |
| ATOM | 6980 | C   | GLY | 286 | 16.452 | -75.143 | 28.833 | 1.00 | 0.00 |
| C    |      |     |     |     |        |         |        |      |      |
| ATOM | 6981 | O   | GLY | 286 | 17.101 | -74.128 | 29.136 | 1.00 | 0.00 |
| O    |      |     |     |     |        |         |        |      |      |
| ATOM | 6982 | N   | THR | 287 | 16.983 | -76.281 | 28.366 | 1.00 | 0.00 |
| N    |      |     |     |     |        |         |        |      |      |
| ATOM | 6983 | CA  | THR | 287 | 18.435 | -76.587 | 28.503 | 1.00 | 0.00 |
| C    |      |     |     |     |        |         |        |      |      |

|      |      |     |     |     |        |         |        |      |      |
|------|------|-----|-----|-----|--------|---------|--------|------|------|
| ATOM | 6984 | CB  | THR | 287 | 18.682 | -77.411 | 29.840 | 1.00 | 0.00 |
| C    |      |     |     |     |        |         |        |      |      |
| ATOM | 6985 | CG2 | THR | 287 | 20.170 | -78.010 | 29.925 | 1.00 | 0.00 |
| C    |      |     |     |     |        |         |        |      |      |
| ATOM | 6986 | OG1 | THR | 287 | 18.700 | -76.535 | 30.980 | 1.00 | 0.00 |
| O    |      |     |     |     |        |         |        |      |      |
| ATOM | 6987 | C   | THR | 287 | 18.843 | -77.349 | 27.229 | 1.00 | 0.00 |
| C    |      |     |     |     |        |         |        |      |      |
| ATOM | 6988 | O   | THR | 287 | 18.120 | -78.223 | 26.804 | 1.00 | 0.00 |
| O    |      |     |     |     |        |         |        |      |      |
| ATOM | 6989 | N   | THR | 288 | 20.017 | -77.066 | 26.655 | 1.00 | 0.00 |
| N    |      |     |     |     |        |         |        |      |      |
| ATOM | 6990 | CA  | THR | 288 | 20.760 | -77.798 | 25.573 | 1.00 | 0.00 |
| C    |      |     |     |     |        |         |        |      |      |
| ATOM | 6991 | CB  | THR | 288 | 21.563 | -76.769 | 24.695 | 1.00 | 0.00 |
| C    |      |     |     |     |        |         |        |      |      |
| ATOM | 6992 | CG2 | THR | 288 | 20.712 | -75.609 | 24.151 | 1.00 | 0.00 |
| C    |      |     |     |     |        |         |        |      |      |
| ATOM | 6993 | OG1 | THR | 288 | 22.722 | -76.175 | 25.376 | 1.00 | 0.00 |
| O    |      |     |     |     |        |         |        |      |      |
| ATOM | 6994 | C   | THR | 288 | 21.568 | -78.996 | 26.023 | 1.00 | 0.00 |
| C    |      |     |     |     |        |         |        |      |      |
| ATOM | 6995 | O   | THR | 288 | 22.103 | -79.033 | 27.112 | 1.00 | 0.00 |
| O    |      |     |     |     |        |         |        |      |      |
| ATOM | 6996 | N   | ALA | 289 | 21.760 | -79.950 | 25.141 | 1.00 | 0.00 |
| N    |      |     |     |     |        |         |        |      |      |
| ATOM | 6997 | CA  | ALA | 289 | 22.504 | -81.184 | 25.314 | 1.00 | 0.00 |
| C    |      |     |     |     |        |         |        |      |      |
| ATOM | 6998 | CB  | ALA | 289 | 21.569 | -82.278 | 25.813 | 1.00 | 0.00 |
| C    |      |     |     |     |        |         |        |      |      |
| ATOM | 6999 | C   | ALA | 289 | 23.198 | -81.659 | 24.050 | 1.00 | 0.00 |
| C    |      |     |     |     |        |         |        |      |      |
| ATOM | 7000 | O   | ALA | 289 | 22.855 | -81.364 | 22.932 | 1.00 | 0.00 |
| O    |      |     |     |     |        |         |        |      |      |
| ATOM | 7001 | N   | GLU | 290 | 24.331 | -82.383 | 24.162 | 1.00 | 0.00 |
| N    |      |     |     |     |        |         |        |      |      |
| ATOM | 7002 | CA  | GLU | 290 | 25.142 | -82.812 | 23.005 | 1.00 | 0.00 |
| C    |      |     |     |     |        |         |        |      |      |
| ATOM | 7003 | CB  | GLU | 290 | 26.389 | -81.864 | 22.988 | 1.00 | 0.00 |
| C    |      |     |     |     |        |         |        |      |      |
| ATOM | 7004 | CG  | GLU | 290 | 27.399 | -82.146 | 21.884 | 1.00 | 0.00 |
| C    |      |     |     |     |        |         |        |      |      |
| ATOM | 7005 | CD  | GLU | 290 | 28.476 | -81.014 | 21.795 | 1.00 | 0.00 |
| C    |      |     |     |     |        |         |        |      |      |
| ATOM | 7006 | OE1 | GLU | 290 | 29.006 | -80.699 | 22.920 | 1.00 | 0.00 |
| O    |      |     |     |     |        |         |        |      |      |
| ATOM | 7007 | OE2 | GLU | 290 | 28.956 | -80.621 | 20.692 | 1.00 | 0.00 |
| O1-  |      |     |     |     |        |         |        |      |      |
| ATOM | 7008 | C   | GLU | 290 | 25.533 | -84.267 | 23.176 | 1.00 | 0.00 |
| C    |      |     |     |     |        |         |        |      |      |
| ATOM | 7009 | O   | GLU | 290 | 25.696 | -84.662 | 24.320 | 1.00 | 0.00 |
| O    |      |     |     |     |        |         |        |      |      |
| ATOM | 7010 | N   | ILE | 291 | 25.692 | -85.039 | 22.090 | 1.00 | 0.00 |
| N    |      |     |     |     |        |         |        |      |      |

|      |      |     |     |     |        |         |        |      |      |
|------|------|-----|-----|-----|--------|---------|--------|------|------|
| ATOM | 7011 | CA  | ILE | 291 | 26.022 | -86.492 | 22.105 | 1.00 | 0.00 |
| C    |      |     |     |     |        |         |        |      |      |
| ATOM | 7012 | CB  | ILE | 291 | 25.500 | -87.137 | 20.738 | 1.00 | 0.00 |
| C    |      |     |     |     |        |         |        |      |      |
| ATOM | 7013 | CG2 | ILE | 291 | 25.818 | -88.658 | 20.685 | 1.00 | 0.00 |
| C    |      |     |     |     |        |         |        |      |      |
| ATOM | 7014 | CG1 | ILE | 291 | 23.971 | -86.798 | 20.561 | 1.00 | 0.00 |
| C    |      |     |     |     |        |         |        |      |      |
| ATOM | 7015 | CD1 | ILE | 291 | 23.357 | -87.536 | 19.355 | 1.00 | 0.00 |
| C    |      |     |     |     |        |         |        |      |      |
| ATOM | 7016 | C   | ILE | 291 | 27.466 | -86.766 | 22.347 | 1.00 | 0.00 |
| C    |      |     |     |     |        |         |        |      |      |
| ATOM | 7017 | O   | ILE | 291 | 28.309 | -86.129 | 21.697 | 1.00 | 0.00 |
| O    |      |     |     |     |        |         |        |      |      |
| ATOM | 7018 | N   | TYR | 292 | 27.871 | -87.777 | 23.148 | 1.00 | 0.00 |
| N    |      |     |     |     |        |         |        |      |      |
| ATOM | 7019 | CA  | TYR | 292 | 29.230 | -88.309 | 23.217 | 1.00 | 0.00 |
| C    |      |     |     |     |        |         |        |      |      |
| ATOM | 7020 | CB  | TYR | 292 | 29.781 | -87.923 | 24.571 | 1.00 | 0.00 |
| C    |      |     |     |     |        |         |        |      |      |
| ATOM | 7021 | CG  | TYR | 292 | 29.247 | -88.684 | 25.756 | 1.00 | 0.00 |
| C    |      |     |     |     |        |         |        |      |      |
| ATOM | 7022 | CD1 | TYR | 292 | 28.398 | -88.086 | 26.748 | 1.00 | 0.00 |
| C    |      |     |     |     |        |         |        |      |      |
| ATOM | 7023 | CE1 | TYR | 292 | 27.977 | -88.813 | 27.916 | 1.00 | 0.00 |
| C    |      |     |     |     |        |         |        |      |      |
| ATOM | 7024 | CZ  | TYR | 292 | 28.414 | -90.131 | 28.040 | 1.00 | 0.00 |
| C    |      |     |     |     |        |         |        |      |      |
| ATOM | 7025 | OH  | TYR | 292 | 28.108 | -90.760 | 29.173 | 1.00 | 0.00 |
| O    |      |     |     |     |        |         |        |      |      |
| ATOM | 7026 | CE2 | TYR | 292 | 29.188 | -90.748 | 27.061 | 1.00 | 0.00 |
| C    |      |     |     |     |        |         |        |      |      |
| ATOM | 7027 | CD2 | TYR | 292 | 29.713 | -90.018 | 25.967 | 1.00 | 0.00 |
| C    |      |     |     |     |        |         |        |      |      |
| ATOM | 7028 | C   | TYR | 292 | 29.243 | -89.787 | 22.812 | 1.00 | 0.00 |
| C    |      |     |     |     |        |         |        |      |      |
| ATOM | 7029 | O   | TYR | 292 | 30.311 | -90.304 | 22.514 | 1.00 | 0.00 |
| O    |      |     |     |     |        |         |        |      |      |
| ATOM | 7030 | N   | ALA | 293 | 28.096 | -90.494 | 22.682 | 1.00 | 0.00 |
| N    |      |     |     |     |        |         |        |      |      |
| ATOM | 7031 | CA  | ALA | 293 | 28.074 | -91.862 | 22.172 | 1.00 | 0.00 |
| C    |      |     |     |     |        |         |        |      |      |
| ATOM | 7032 | CB  | ALA | 293 | 28.223 | -92.821 | 23.321 | 1.00 | 0.00 |
| C    |      |     |     |     |        |         |        |      |      |
| ATOM | 7033 | C   | ALA | 293 | 26.852 | -92.303 | 21.336 | 1.00 | 0.00 |
| C    |      |     |     |     |        |         |        |      |      |
| ATOM | 7034 | O   | ALA | 293 | 25.699 | -91.811 | 21.598 | 1.00 | 0.00 |
| O    |      |     |     |     |        |         |        |      |      |
| ATOM | 7035 | N   | TYR | 294 | 26.962 | -93.086 | 20.299 | 1.00 | 0.00 |
| N    |      |     |     |     |        |         |        |      |      |
| ATOM | 7036 | CA  | TYR | 294 | 25.881 | -93.572 | 19.434 | 1.00 | 0.00 |
| C    |      |     |     |     |        |         |        |      |      |
| ATOM | 7037 | CB  | TYR | 294 | 25.633 | -92.583 | 18.273 | 1.00 | 0.00 |
| C    |      |     |     |     |        |         |        |      |      |



|      |      |     |     |     |        |          |        |      |      |
|------|------|-----|-----|-----|--------|----------|--------|------|------|
| ATOM | 7038 | CG  | TYR | 294 | 24.630 | -93.044  | 17.210 | 1.00 | 0.00 |
| C    |      |     |     |     |        |          |        |      |      |
| ATOM | 7039 | CD1 | TYR | 294 | 23.480 | -92.254  | 17.021 | 1.00 | 0.00 |
| C    |      |     |     |     |        |          |        |      |      |
| ATOM | 7040 | CE1 | TYR | 294 | 22.498 | -92.520  | 16.057 | 1.00 | 0.00 |
| C    |      |     |     |     |        |          |        |      |      |
| ATOM | 7041 | CZ  | TYR | 294 | 22.676 | -93.708  | 15.300 | 1.00 | 0.00 |
| C    |      |     |     |     |        |          |        |      |      |
| ATOM | 7042 | OH  | TYR | 294 | 21.767 | -94.117  | 14.370 | 1.00 | 0.00 |
| O    |      |     |     |     |        |          |        |      |      |
| ATOM | 7043 | CE2 | TYR | 294 | 23.850 | -94.490  | 15.427 | 1.00 | 0.00 |
| C    |      |     |     |     |        |          |        |      |      |
| ATOM | 7044 | CD2 | TYR | 294 | 24.867 | -94.156  | 16.320 | 1.00 | 0.00 |
| C    |      |     |     |     |        |          |        |      |      |
| ATOM | 7045 | C   | TYR | 294 | 26.172 | -94.973  | 18.890 | 1.00 | 0.00 |
| C    |      |     |     |     |        |          |        |      |      |
| ATOM | 7046 | O   | TYR | 294 | 27.367 | -95.229  | 18.450 | 1.00 | 0.00 |
| O    |      |     |     |     |        |          |        |      |      |
| ATOM | 7047 | N   | ARG | 295 | 25.166 | -95.947  | 18.906 | 1.00 | 0.00 |
| N    |      |     |     |     |        |          |        |      |      |
| ATOM | 7048 | CA  | ARG | 295 | 25.236 | -97.278  | 18.306 | 1.00 | 0.00 |
| C    |      |     |     |     |        |          |        |      |      |
| ATOM | 7049 | CB  | ARG | 295 | 25.936 | -98.196  | 19.285 | 1.00 | 0.00 |
| C    |      |     |     |     |        |          |        |      |      |
| ATOM | 7050 | CG  | ARG | 295 | 26.108 | -99.593  | 18.665 | 1.00 | 0.00 |
| C    |      |     |     |     |        |          |        |      |      |
| ATOM | 7051 | CD  | ARG | 295 | 27.330 | -100.290 | 19.282 | 1.00 | 0.00 |
| C    |      |     |     |     |        |          |        |      |      |
| ATOM | 7052 | NE  | ARG | 295 | 27.378 | -101.745 | 19.098 | 1.00 | 0.00 |
| N    |      |     |     |     |        |          |        |      |      |
| ATOM | 7053 | CZ  | ARG | 295 | 28.425 | -102.500 | 18.773 | 1.00 | 0.00 |
| C    |      |     |     |     |        |          |        |      |      |
| ATOM | 7054 | NH1 | ARG | 295 | 28.226 | -103.734 | 18.453 | 1.00 | 0.00 |
| N    |      |     |     |     |        |          |        |      |      |
| ATOM | 7055 | NH2 | ARG | 295 | 29.643 | -102.123 | 18.752 | 1.00 | 0.00 |
| N1+  |      |     |     |     |        |          |        |      |      |
| ATOM | 7056 | C   | ARG | 295 | 23.808 | -97.751  | 18.020 | 1.00 | 0.00 |
| C    |      |     |     |     |        |          |        |      |      |
| ATOM | 7057 | O   | ARG | 295 | 23.031 | -97.834  | 18.963 | 1.00 | 0.00 |
| O    |      |     |     |     |        |          |        |      |      |
| ATOM | 7058 | N   | GLU | 296 | 23.606 | -98.131  | 16.832 | 1.00 | 0.00 |
| N    |      |     |     |     |        |          |        |      |      |
| ATOM | 7059 | CA  | GLU | 296 | 22.410 | -98.789  | 16.328 | 1.00 | 0.00 |
| C    |      |     |     |     |        |          |        |      |      |
| ATOM | 7060 | CB  | GLU | 296 | 21.892 | -98.169  | 15.063 | 1.00 | 0.00 |
| C    |      |     |     |     |        |          |        |      |      |
| ATOM | 7061 | CG  | GLU | 296 | 22.735 | -98.324  | 13.882 | 1.00 | 0.00 |
| C    |      |     |     |     |        |          |        |      |      |
| ATOM | 7062 | CD  | GLU | 296 | 22.425 | -97.438  | 12.733 | 1.00 | 0.00 |
| C    |      |     |     |     |        |          |        |      |      |
| ATOM | 7063 | OE1 | GLU | 296 | 22.163 | -96.217  | 12.897 | 1.00 | 0.00 |
| O    |      |     |     |     |        |          |        |      |      |
| ATOM | 7064 | OE2 | GLU | 296 | 22.494 | -97.930  | 11.580 | 1.00 | 0.00 |
| O1-  |      |     |     |     |        |          |        |      |      |

|      |      |     |     |     |                |        |      |      |
|------|------|-----|-----|-----|----------------|--------|------|------|
| ATOM | 7065 | C   | GLU | 296 | 22.594-100.268 | 16.335 | 1.00 | 0.00 |
| C    |      |     |     |     |                |        |      |      |
| ATOM | 7066 | O   | GLU | 296 | 23.587-100.735 | 15.717 | 1.00 | 0.00 |
| O    |      |     |     |     |                |        |      |      |
| ATOM | 7067 | N   | GLU | 297 | 21.795-101.088 | 17.065 | 1.00 | 0.00 |
| N    |      |     |     |     |                |        |      |      |
| ATOM | 7068 | CA  | GLU | 297 | 22.212-102.353 | 17.605 | 1.00 | 0.00 |
| C    |      |     |     |     |                |        |      |      |
| ATOM | 7069 | CB  | GLU | 297 | 22.642-102.011 | 19.067 | 1.00 | 0.00 |
| C    |      |     |     |     |                |        |      |      |
| ATOM | 7070 | CG  | GLU | 297 | 22.988-103.267 | 19.878 | 1.00 | 0.00 |
| C    |      |     |     |     |                |        |      |      |
| ATOM | 7071 | CD  | GLU | 297 | 24.177-104.146 | 19.423 | 1.00 | 0.00 |
| C    |      |     |     |     |                |        |      |      |
| ATOM | 7072 | OE1 | GLU | 297 | 24.171-105.362 | 19.659 | 1.00 | 0.00 |
| O    |      |     |     |     |                |        |      |      |
| ATOM | 7073 | OE2 | GLU | 297 | 25.109-103.632 | 18.754 | 1.00 | 0.00 |
| O1-  |      |     |     |     |                |        |      |      |
| ATOM | 7074 | C   | GLU | 297 | 21.075-103.314 | 17.672 | 1.00 | 0.00 |
| C    |      |     |     |     |                |        |      |      |
| ATOM | 7075 | O   | GLU | 297 | 20.000-103.007 | 18.080 | 1.00 | 0.00 |
| O    |      |     |     |     |                |        |      |      |
| ATOM | 7076 | N   | GLN | 298 | 21.279-104.552 | 17.203 | 1.00 | 0.00 |
| N    |      |     |     |     |                |        |      |      |
| ATOM | 7077 | CA  | GLN | 298 | 20.312-105.490 | 16.928 | 1.00 | 0.00 |
| C    |      |     |     |     |                |        |      |      |
| ATOM | 7078 | CB  | GLN | 298 | 20.846-106.694 | 16.092 | 1.00 | 0.00 |
| C    |      |     |     |     |                |        |      |      |
| ATOM | 7079 | CG  | GLN | 298 | 21.782-107.680 | 16.873 | 1.00 | 0.00 |
| C    |      |     |     |     |                |        |      |      |
| ATOM | 7080 | CD  | GLN | 298 | 22.617-108.508 | 15.934 | 1.00 | 0.00 |
| C    |      |     |     |     |                |        |      |      |
| ATOM | 7081 | OE1 | GLN | 298 | 22.153-108.997 | 14.950 | 1.00 | 0.00 |
| O    |      |     |     |     |                |        |      |      |
| ATOM | 7082 | NE2 | GLN | 298 | 23.839-108.755 | 16.222 | 1.00 | 0.00 |
| N    |      |     |     |     |                |        |      |      |
| ATOM | 7083 | C   | GLN | 298 | 19.495-105.956 | 18.153 | 1.00 | 0.00 |
| C    |      |     |     |     |                |        |      |      |
| ATOM | 7084 | O   | GLN | 298 | 18.985-107.080 | 18.095 | 1.00 | 0.00 |
| O    |      |     |     |     |                |        |      |      |
| ATOM | 7085 | N   | ASP | 299 | 19.381-105.276 | 19.293 | 1.00 | 0.00 |
| N    |      |     |     |     |                |        |      |      |
| ATOM | 7086 | CA  | ASP | 299 | 18.989-105.774 | 20.633 | 1.00 | 0.00 |
| C    |      |     |     |     |                |        |      |      |
| ATOM | 7087 | CB  | ASP | 299 | 18.866-104.506 | 21.529 | 1.00 | 0.00 |
| C    |      |     |     |     |                |        |      |      |
| ATOM | 7088 | CG  | ASP | 299 | 18.615-104.882 | 23.003 | 1.00 | 0.00 |
| C    |      |     |     |     |                |        |      |      |
| ATOM | 7089 | OD1 | ASP | 299 | 18.287-103.999 | 23.784 | 1.00 | 0.00 |
| O    |      |     |     |     |                |        |      |      |
| ATOM | 7090 | OD2 | ASP | 299 | 18.739-106.064 | 23.455 | 1.00 | 0.00 |
| O1-  |      |     |     |     |                |        |      |      |
| ATOM | 7091 | C   | ASP | 299 | 17.606-106.512 | 20.661 | 1.00 | 0.00 |
| C    |      |     |     |     |                |        |      |      |

|      |      |     |     |     |                |        |      |      |
|------|------|-----|-----|-----|----------------|--------|------|------|
| ATOM | 7092 | O   | ASP | 299 | 17.369-107.520 | 21.331 | 1.00 | 0.00 |
| O    |      |     |     |     |                |        |      |      |
| ATOM | 7093 | N   | PHE | 300 | 16.621-106.102 | 19.875 | 1.00 | 0.00 |
| N    |      |     |     |     |                |        |      |      |
| ATOM | 7094 | CA  | PHE | 300 | 15.252-106.696 | 19.728 | 1.00 | 0.00 |
| C    |      |     |     |     |                |        |      |      |
| ATOM | 7095 | CB  | PHE | 300 | 14.253-105.587 | 19.436 | 1.00 | 0.00 |
| C    |      |     |     |     |                |        |      |      |
| ATOM | 7096 | CG  | PHE | 300 | 13.841-104.525 | 20.468 | 1.00 | 0.00 |
| C    |      |     |     |     |                |        |      |      |
| ATOM | 7097 | CD1 | PHE | 300 | 12.727-103.760 | 20.240 | 1.00 | 0.00 |
| C    |      |     |     |     |                |        |      |      |
| ATOM | 7098 | CE1 | PHE | 300 | 12.390-102.793 | 21.137 | 1.00 | 0.00 |
| C    |      |     |     |     |                |        |      |      |
| ATOM | 7099 | CZ  | PHE | 300 | 13.076-102.607 | 22.393 | 1.00 | 0.00 |
| C    |      |     |     |     |                |        |      |      |
| ATOM | 7100 | CE2 | PHE | 300 | 14.145-103.474 | 22.671 | 1.00 | 0.00 |
| C    |      |     |     |     |                |        |      |      |
| ATOM | 7101 | CD2 | PHE | 300 | 14.568-104.376 | 21.653 | 1.00 | 0.00 |
| C    |      |     |     |     |                |        |      |      |
| ATOM | 7102 | C   | PHE | 300 | 15.233-107.876 | 18.753 | 1.00 | 0.00 |
| C    |      |     |     |     |                |        |      |      |
| ATOM | 7103 | O   | PHE | 300 | 14.229-108.581 | 18.728 | 1.00 | 0.00 |
| O    |      |     |     |     |                |        |      |      |
| ATOM | 7104 | N   | GLY | 301 | 16.300-108.230 | 18.018 | 1.00 | 0.00 |
| N    |      |     |     |     |                |        |      |      |
| ATOM | 7105 | CA  | GLY | 301 | 16.104-108.846 | 16.725 | 1.00 | 0.00 |
| C    |      |     |     |     |                |        |      |      |
| ATOM | 7106 | C   | GLY | 301 | 16.037-107.974 | 15.491 | 1.00 | 0.00 |
| C    |      |     |     |     |                |        |      |      |
| ATOM | 7107 | O   | GLY | 301 | 15.775-108.498 | 14.410 | 1.00 | 0.00 |
| O    |      |     |     |     |                |        |      |      |
| ATOM | 7108 | N   | ILE | 302 | 16.341-106.679 | 15.656 | 1.00 | 0.00 |
| N    |      |     |     |     |                |        |      |      |
| ATOM | 7109 | CA  | ILE | 302 | 16.231-105.484 | 14.775 | 1.00 | 0.00 |
| C    |      |     |     |     |                |        |      |      |
| ATOM | 7110 | CB  | ILE | 302 | 14.722-105.108 | 14.461 | 1.00 | 0.00 |
| C    |      |     |     |     |                |        |      |      |
| ATOM | 7111 | CG2 | ILE | 302 | 13.970-104.818 | 15.778 | 1.00 | 0.00 |
| C    |      |     |     |     |                |        |      |      |
| ATOM | 7112 | CG1 | ILE | 302 | 14.493-104.096 | 13.383 | 1.00 | 0.00 |
| C    |      |     |     |     |                |        |      |      |
| ATOM | 7113 | CD1 | ILE | 302 | 14.950-104.566 | 11.955 | 1.00 | 0.00 |
| C    |      |     |     |     |                |        |      |      |
| ATOM | 7114 | C   | ILE | 302 | 16.989-104.398 | 15.430 | 1.00 | 0.00 |
| C    |      |     |     |     |                |        |      |      |
| ATOM | 7115 | O   | ILE | 302 | 17.112-104.354 | 16.695 | 1.00 | 0.00 |
| O    |      |     |     |     |                |        |      |      |
| ATOM | 7116 | N   | GLU | 303 | 17.663-103.478 | 14.729 | 1.00 | 0.00 |
| N    |      |     |     |     |                |        |      |      |
| ATOM | 7117 | CA  | GLU | 303 | 18.559-102.491 | 15.225 | 1.00 | 0.00 |
| C    |      |     |     |     |                |        |      |      |
| ATOM | 7118 | CB  | GLU | 303 | 19.433-102.017 | 13.979 | 1.00 | 0.00 |
| C    |      |     |     |     |                |        |      |      |

|      |      |     |     |     |                |        |      |      |
|------|------|-----|-----|-----|----------------|--------|------|------|
| ATOM | 7119 | CG  | GLU | 303 | 20.286-103.116 | 13.434 | 1.00 | 0.00 |
| C    |      |     |     |     |                |        |      |      |
| ATOM | 7120 | CD  | GLU | 303 | 19.571-104.186 | 12.667 | 1.00 | 0.00 |
| C    |      |     |     |     |                |        |      |      |
| ATOM | 7121 | OE1 | GLU | 303 | 20.200-105.279 | 12.503 | 1.00 | 0.00 |
| O    |      |     |     |     |                |        |      |      |
| ATOM | 7122 | OE2 | GLU | 303 | 18.458-104.106 | 12.198 | 1.00 | 0.00 |
| O1-  |      |     |     |     |                |        |      |      |
| ATOM | 7123 | C   | GLU | 303 | 17.854-101.323 | 15.904 | 1.00 | 0.00 |
| C    |      |     |     |     |                |        |      |      |
| ATOM | 7124 | O   | GLU | 303 | 17.182-100.472 | 15.253 | 1.00 | 0.00 |
| O    |      |     |     |     |                |        |      |      |
| ATOM | 7125 | N   | ILE | 304 | 18.006-101.224 | 17.216 | 1.00 | 0.00 |
| N    |      |     |     |     |                |        |      |      |
| ATOM | 7126 | CA  | ILE | 304 | 17.479-100.090 | 17.962 | 1.00 | 0.00 |
| C    |      |     |     |     |                |        |      |      |
| ATOM | 7127 | CB  | ILE | 304 | 16.864-100.555 | 19.280 | 1.00 | 0.00 |
| C    |      |     |     |     |                |        |      |      |
| ATOM | 7128 | CG2 | ILE | 304 | 17.818-100.910 | 20.426 | 1.00 | 0.00 |
| C    |      |     |     |     |                |        |      |      |
| ATOM | 7129 | CG1 | ILE | 304 | 15.943 -99.450 | 19.871 | 1.00 | 0.00 |
| C    |      |     |     |     |                |        |      |      |
| ATOM | 7130 | CD1 | ILE | 304 | 14.758 -99.974 | 20.720 | 1.00 | 0.00 |
| C    |      |     |     |     |                |        |      |      |
| ATOM | 7131 | C   | ILE | 304 | 18.614 -98.985 | 18.141 | 1.00 | 0.00 |
| C    |      |     |     |     |                |        |      |      |
| ATOM | 7132 | O   | ILE | 304 | 19.740 -99.423 | 18.393 | 1.00 | 0.00 |
| O    |      |     |     |     |                |        |      |      |
| ATOM | 7133 | N   | VAL | 305 | 18.323 -97.696 | 18.072 | 1.00 | 0.00 |
| N    |      |     |     |     |                |        |      |      |
| ATOM | 7134 | CA  | VAL | 305 | 19.353 -96.647 | 18.300 | 1.00 | 0.00 |
| C    |      |     |     |     |                |        |      |      |
| ATOM | 7135 | CB  | VAL | 305 | 19.187 -95.350 | 17.367 | 1.00 | 0.00 |
| C    |      |     |     |     |                |        |      |      |
| ATOM | 7136 | CG1 | VAL | 305 | 20.394 -94.483 | 17.590 | 1.00 | 0.00 |
| C    |      |     |     |     |                |        |      |      |
| ATOM | 7137 | CG2 | VAL | 305 | 19.086 -95.657 | 15.906 | 1.00 | 0.00 |
| C    |      |     |     |     |                |        |      |      |
| ATOM | 7138 | C   | VAL | 305 | 19.542 -96.302 | 19.786 | 1.00 | 0.00 |
| C    |      |     |     |     |                |        |      |      |
| ATOM | 7139 | O   | VAL | 305 | 18.717 -95.666 | 20.356 | 1.00 | 0.00 |
| O    |      |     |     |     |                |        |      |      |
| ATOM | 7140 | N   | LYS | 306 | 20.667 -96.649 | 20.398 | 1.00 | 0.00 |
| N    |      |     |     |     |                |        |      |      |
| ATOM | 7141 | CA  | LYS | 306 | 21.103 -96.281 | 21.685 | 1.00 | 0.00 |
| C    |      |     |     |     |                |        |      |      |
| ATOM | 7142 | CB  | LYS | 306 | 21.581 -97.497 | 22.409 | 1.00 | 0.00 |
| C    |      |     |     |     |                |        |      |      |
| ATOM | 7143 | CG  | LYS | 306 | 20.693 -98.730 | 22.235 | 1.00 | 0.00 |
| C    |      |     |     |     |                |        |      |      |
| ATOM | 7144 | CD  | LYS | 306 | 21.271 -99.916 | 23.092 | 1.00 | 0.00 |
| C    |      |     |     |     |                |        |      |      |
| ATOM | 7145 | CE  | LYS | 306 | 20.164-100.982 | 23.147 | 1.00 | 0.00 |
| C    |      |     |     |     |                |        |      |      |

|      |      |     |     |     |        |          |        |      |      |
|------|------|-----|-----|-----|--------|----------|--------|------|------|
| ATOM | 7146 | NZ  | LYS | 306 | 20.411 | -102.017 | 24.068 | 1.00 | 0.00 |
| N1+  |      |     |     |     |        |          |        |      |      |
| ATOM | 7147 | C   | LYS | 306 | 22.103 | -95.141  | 21.632 | 1.00 | 0.00 |
| C    |      |     |     |     |        |          |        |      |      |
| ATOM | 7148 | O   | LYS | 306 | 23.058 | -95.235  | 20.858 | 1.00 | 0.00 |
| O    |      |     |     |     |        |          |        |      |      |
| ATOM | 7149 | N   | VAL | 307 | 21.997 | -94.077  | 22.423 | 1.00 | 0.00 |
| N    |      |     |     |     |        |          |        |      |      |
| ATOM | 7150 | CA  | VAL | 307 | 22.811 | -92.830  | 22.476 | 1.00 | 0.00 |
| C    |      |     |     |     |        |          |        |      |      |
| ATOM | 7151 | CB  | VAL | 307 | 22.018 | -91.603  | 21.854 | 1.00 | 0.00 |
| C    |      |     |     |     |        |          |        |      |      |
| ATOM | 7152 | CG1 | VAL | 307 | 22.663 | -90.273  | 21.891 | 1.00 | 0.00 |
| C    |      |     |     |     |        |          |        |      |      |
| ATOM | 7153 | CG2 | VAL | 307 | 21.632 | -91.774  | 20.364 | 1.00 | 0.00 |
| C    |      |     |     |     |        |          |        |      |      |
| ATOM | 7154 | C   | VAL | 307 | 23.192 | -92.593  | 23.953 | 1.00 | 0.00 |
| C    |      |     |     |     |        |          |        |      |      |
| ATOM | 7155 | O   | VAL | 307 | 22.472 | -92.928  | 24.890 | 1.00 | 0.00 |
| O    |      |     |     |     |        |          |        |      |      |
| ATOM | 7156 | N   | LYS | 308 | 24.305 | -91.901  | 24.196 | 1.00 | 0.00 |
| N    |      |     |     |     |        |          |        |      |      |
| ATOM | 7157 | CA  | LYS | 308 | 24.589 | -91.168  | 25.437 | 1.00 | 0.00 |
| C    |      |     |     |     |        |          |        |      |      |
| ATOM | 7158 | CB  | LYS | 308 | 25.765 | -91.889  | 26.099 | 1.00 | 0.00 |
| C    |      |     |     |     |        |          |        |      |      |
| ATOM | 7159 | CG  | LYS | 308 | 25.619 | -93.364  | 26.441 | 1.00 | 0.00 |
| C    |      |     |     |     |        |          |        |      |      |
| ATOM | 7160 | CD  | LYS | 308 | 26.757 | -94.073  | 27.230 | 1.00 | 0.00 |
| C    |      |     |     |     |        |          |        |      |      |
| ATOM | 7161 | CE  | LYS | 308 | 26.405 | -95.541  | 27.394 | 1.00 | 0.00 |
| C    |      |     |     |     |        |          |        |      |      |
| ATOM | 7162 | NZ  | LYS | 308 | 27.651 | -96.378  | 27.603 | 1.00 | 0.00 |
| N1+  |      |     |     |     |        |          |        |      |      |
| ATOM | 7163 | C   | LYS | 308 | 24.890 | -89.665  | 25.144 | 1.00 | 0.00 |
| C    |      |     |     |     |        |          |        |      |      |
| ATOM | 7164 | O   | LYS | 308 | 25.479 | -89.356  | 24.142 | 1.00 | 0.00 |
| O    |      |     |     |     |        |          |        |      |      |
| ATOM | 7165 | N   | ALA | 309 | 24.337 | -88.714  | 25.930 | 1.00 | 0.00 |
| N    |      |     |     |     |        |          |        |      |      |
| ATOM | 7166 | CA  | ALA | 309 | 24.614 | -87.271  | 25.763 | 1.00 | 0.00 |
| C    |      |     |     |     |        |          |        |      |      |
| ATOM | 7167 | CB  | ALA | 309 | 23.333 | -86.638  | 25.132 | 1.00 | 0.00 |
| C    |      |     |     |     |        |          |        |      |      |
| ATOM | 7168 | C   | ALA | 309 | 24.856 | -86.677  | 27.161 | 1.00 | 0.00 |
| C    |      |     |     |     |        |          |        |      |      |
| ATOM | 7169 | O   | ALA | 309 | 24.837 | -87.362  | 28.187 | 1.00 | 0.00 |
| O    |      |     |     |     |        |          |        |      |      |
| ATOM | 7170 | N   | ILE | 310 | 25.165 | -85.417  | 27.133 | 1.00 | 0.00 |
| N    |      |     |     |     |        |          |        |      |      |
| ATOM | 7171 | CA  | ILE | 310 | 25.474 | -84.666  | 28.380 | 1.00 | 0.00 |
| C    |      |     |     |     |        |          |        |      |      |
| ATOM | 7172 | CB  | ILE | 310 | 27.007 | -84.698  | 28.783 | 1.00 | 0.00 |
| C    |      |     |     |     |        |          |        |      |      |

|      |      |     |     |     |        |         |        |      |      |
|------|------|-----|-----|-----|--------|---------|--------|------|------|
| ATOM | 7173 | CG2 | ILE | 310 | 27.909 | -83.883 | 27.890 | 1.00 | 0.00 |
| C    |      |     |     |     |        |         |        |      |      |
| ATOM | 7174 | CG1 | ILE | 310 | 27.160 | -84.261 | 30.232 | 1.00 | 0.00 |
| C    |      |     |     |     |        |         |        |      |      |
| ATOM | 7175 | CD1 | ILE | 310 | 28.525 | -84.650 | 30.771 | 1.00 | 0.00 |
| C    |      |     |     |     |        |         |        |      |      |
| ATOM | 7176 | C   | ILE | 310 | 24.869 | -83.244 | 28.249 | 1.00 | 0.00 |
| C    |      |     |     |     |        |         |        |      |      |
| ATOM | 7177 | O   | ILE | 310 | 24.737 | -82.772 | 27.088 | 1.00 | 0.00 |
| O    |      |     |     |     |        |         |        |      |      |
| ATOM | 7178 | N   | GLY | 311 | 24.533 | -82.612 | 29.344 | 1.00 | 0.00 |
| N    |      |     |     |     |        |         |        |      |      |
| ATOM | 7179 | CA  | GLY | 311 | 23.887 | -81.367 | 29.240 | 1.00 | 0.00 |
| C    |      |     |     |     |        |         |        |      |      |
| ATOM | 7180 | C   | GLY | 311 | 24.853 | -80.213 | 29.083 | 1.00 | 0.00 |
| C    |      |     |     |     |        |         |        |      |      |
| ATOM | 7181 | O   | GLY | 311 | 25.978 | -80.268 | 29.727 | 1.00 | 0.00 |
| O    |      |     |     |     |        |         |        |      |      |
| ATOM | 7182 | N   | ARG | 312 | 24.563 | -79.131 | 28.343 | 1.00 | 0.00 |
| N    |      |     |     |     |        |         |        |      |      |
| ATOM | 7183 | CA  | ARG | 312 | 25.436 | -77.971 | 28.004 | 1.00 | 0.00 |
| C    |      |     |     |     |        |         |        |      |      |
| ATOM | 7184 | CB  | ARG | 312 | 25.617 | -77.932 | 26.458 | 1.00 | 0.00 |
| C    |      |     |     |     |        |         |        |      |      |
| ATOM | 7185 | CG  | ARG | 312 | 26.463 | -79.111 | 25.823 | 1.00 | 0.00 |
| C    |      |     |     |     |        |         |        |      |      |
| ATOM | 7186 | CD  | ARG | 312 | 27.829 | -79.313 | 26.435 | 1.00 | 0.00 |
| C    |      |     |     |     |        |         |        |      |      |
| ATOM | 7187 | NE  | ARG | 312 | 28.513 | -80.395 | 25.708 | 1.00 | 0.00 |
| N    |      |     |     |     |        |         |        |      |      |
| ATOM | 7188 | CZ  | ARG | 312 | 29.524 | -81.102 | 26.142 | 1.00 | 0.00 |
| C    |      |     |     |     |        |         |        |      |      |
| ATOM | 7189 | NH1 | ARG | 312 | 29.927 | -81.273 | 27.346 | 1.00 | 0.00 |
| N    |      |     |     |     |        |         |        |      |      |
| ATOM | 7190 | NH2 | ARG | 312 | 30.282 | -81.601 | 25.189 | 1.00 | 0.00 |
| N1+  |      |     |     |     |        |         |        |      |      |
| ATOM | 7191 | C   | ARG | 312 | 25.009 | -76.609 | 28.605 | 1.00 | 0.00 |
| C    |      |     |     |     |        |         |        |      |      |
| ATOM | 7192 | O   | ARG | 312 | 25.570 | -76.366 | 29.714 | 1.00 | 0.00 |
| O    |      |     |     |     |        |         |        |      |      |
| ATOM | 7193 | N   | GLN | 313 | 23.966 | -75.904 | 28.115 | 1.00 | 0.00 |
| N    |      |     |     |     |        |         |        |      |      |
| ATOM | 7194 | CA  | GLN | 313 | 23.550 | -74.519 | 28.533 | 1.00 | 0.00 |
| C    |      |     |     |     |        |         |        |      |      |
| ATOM | 7195 | CB  | GLN | 313 | 24.129 | -73.458 | 27.494 | 1.00 | 0.00 |
| C    |      |     |     |     |        |         |        |      |      |
| ATOM | 7196 | CG  | GLN | 313 | 25.480 | -73.796 | 26.768 | 1.00 | 0.00 |
| C    |      |     |     |     |        |         |        |      |      |
| ATOM | 7197 | CD  | GLN | 313 | 26.075 | -72.835 | 25.798 | 1.00 | 0.00 |
| C    |      |     |     |     |        |         |        |      |      |
| ATOM | 7198 | OE1 | GLN | 313 | 26.068 | -73.187 | 24.620 | 1.00 | 0.00 |
| O    |      |     |     |     |        |         |        |      |      |
| ATOM | 7199 | NE2 | GLN | 313 | 26.513 | -71.693 | 26.269 | 1.00 | 0.00 |
| N    |      |     |     |     |        |         |        |      |      |

|      |      |     |     |     |        |         |        |      |      |
|------|------|-----|-----|-----|--------|---------|--------|------|------|
| ATOM | 7200 | C   | GLN | 313 | 22.049 | -74.335 | 28.726 | 1.00 | 0.00 |
| C    |      |     |     |     |        |         |        |      |      |
| ATOM | 7201 | O   | GLN | 313 | 21.218 | -75.064 | 28.259 | 1.00 | 0.00 |
| O    |      |     |     |     |        |         |        |      |      |
| ATOM | 7202 | N   | ARG | 314 | 21.717 | -73.253 | 29.485 | 1.00 | 0.00 |
| N    |      |     |     |     |        |         |        |      |      |
| ATOM | 7203 | CA  | ARG | 314 | 20.319 | -72.790 | 29.705 | 1.00 | 0.00 |
| C    |      |     |     |     |        |         |        |      |      |
| ATOM | 7204 | CB  | ARG | 314 | 20.174 | -72.192 | 31.105 | 1.00 | 0.00 |
| C    |      |     |     |     |        |         |        |      |      |
| ATOM | 7205 | CG  | ARG | 314 | 20.448 | -73.160 | 32.247 | 1.00 | 0.00 |
| C    |      |     |     |     |        |         |        |      |      |
| ATOM | 7206 | CD  | ARG | 314 | 20.306 | -72.422 | 33.576 | 1.00 | 0.00 |
| C    |      |     |     |     |        |         |        |      |      |
| ATOM | 7207 | NE  | ARG | 314 | 21.249 | -71.258 | 33.658 | 1.00 | 0.00 |
| N    |      |     |     |     |        |         |        |      |      |
| ATOM | 7208 | CZ  | ARG | 314 | 20.895 | -69.974 | 33.762 | 1.00 | 0.00 |
| C    |      |     |     |     |        |         |        |      |      |
| ATOM | 7209 | NH1 | ARG | 314 | 19.687 | -69.543 | 33.875 | 1.00 | 0.00 |
| N    |      |     |     |     |        |         |        |      |      |
| ATOM | 7210 | NH2 | ARG | 314 | 21.773 | -69.051 | 33.827 | 1.00 | 0.00 |
| N1+  |      |     |     |     |        |         |        |      |      |
| ATOM | 7211 | C   | ARG | 314 | 19.725 | -71.871 | 28.648 | 1.00 | 0.00 |
| C    |      |     |     |     |        |         |        |      |      |
| ATOM | 7212 | O   | ARG | 314 | 20.504 | -71.121 | 28.016 | 1.00 | 0.00 |
| O    |      |     |     |     |        |         |        |      |      |
| ATOM | 7213 | N   | PHE | 315 | 18.396 | -71.770 | 28.552 | 1.00 | 0.00 |
| N    |      |     |     |     |        |         |        |      |      |
| ATOM | 7214 | CA  | PHE | 315 | 17.814 | -70.750 | 27.712 | 1.00 | 0.00 |
| C    |      |     |     |     |        |         |        |      |      |
| ATOM | 7215 | CB  | PHE | 315 | 17.874 | -71.161 | 26.253 | 1.00 | 0.00 |
| C    |      |     |     |     |        |         |        |      |      |
| ATOM | 7216 | CG  | PHE | 315 | 17.170 | -72.470 | 25.929 | 1.00 | 0.00 |
| C    |      |     |     |     |        |         |        |      |      |
| ATOM | 7217 | CD1 | PHE | 315 | 15.809 | -72.550 | 25.887 | 1.00 | 0.00 |
| C    |      |     |     |     |        |         |        |      |      |
| ATOM | 7218 | CE1 | PHE | 315 | 15.202 | -73.790 | 25.588 | 1.00 | 0.00 |
| C    |      |     |     |     |        |         |        |      |      |
| ATOM | 7219 | CZ  | PHE | 315 | 16.003 | -74.921 | 25.440 | 1.00 | 0.00 |
| C    |      |     |     |     |        |         |        |      |      |
| ATOM | 7220 | CE2 | PHE | 315 | 17.353 | -74.843 | 25.558 | 1.00 | 0.00 |
| C    |      |     |     |     |        |         |        |      |      |
| ATOM | 7221 | CD2 | PHE | 315 | 17.940 | -73.617 | 25.828 | 1.00 | 0.00 |
| C    |      |     |     |     |        |         |        |      |      |
| ATOM | 7222 | C   | PHE | 315 | 16.368 | -70.289 | 28.141 | 1.00 | 0.00 |
| C    |      |     |     |     |        |         |        |      |      |
| ATOM | 7223 | O   | PHE | 315 | 15.600 | -70.944 | 28.860 | 1.00 | 0.00 |
| O    |      |     |     |     |        |         |        |      |      |
| ATOM | 7224 | N   | LYS | 316 | 15.991 | -69.180 | 27.468 | 1.00 | 0.00 |
| N    |      |     |     |     |        |         |        |      |      |
| ATOM | 7225 | CA  | LYS | 316 | 14.633 | -68.692 | 27.406 | 1.00 | 0.00 |
| C    |      |     |     |     |        |         |        |      |      |
| ATOM | 7226 | CB  | LYS | 316 | 14.535 | -67.190 | 27.952 | 1.00 | 0.00 |
| C    |      |     |     |     |        |         |        |      |      |

|      |      |     |     |     |        |         |        |      |      |
|------|------|-----|-----|-----|--------|---------|--------|------|------|
| ATOM | 7227 | CG  | LYS | 316 | 15.376 | -66.192 | 27.263 | 1.00 | 0.00 |
| C    |      |     |     |     |        |         |        |      |      |
| ATOM | 7228 | CD  | LYS | 316 | 15.216 | -64.807 | 28.011 | 1.00 | 0.00 |
| C    |      |     |     |     |        |         |        |      |      |
| ATOM | 7229 | CE  | LYS | 316 | 15.865 | -63.675 | 27.157 | 1.00 | 0.00 |
| C    |      |     |     |     |        |         |        |      |      |
| ATOM | 7230 | NZ  | LYS | 316 | 15.675 | -62.394 | 27.697 | 1.00 | 0.00 |
| N1+  |      |     |     |     |        |         |        |      |      |
| ATOM | 7231 | C   | LYS | 316 | 14.123 | -68.892 | 25.955 | 1.00 | 0.00 |
| C    |      |     |     |     |        |         |        |      |      |
| ATOM | 7232 | O   | LYS | 316 | 14.932 | -68.863 | 25.055 | 1.00 | 0.00 |
| O    |      |     |     |     |        |         |        |      |      |
| ATOM | 7233 | N   | VAL | 317 | 12.892 | -69.323 | 25.792 | 1.00 | 0.00 |
| N    |      |     |     |     |        |         |        |      |      |
| ATOM | 7234 | CA  | VAL | 317 | 12.348 | -69.708 | 24.492 | 1.00 | 0.00 |
| C    |      |     |     |     |        |         |        |      |      |
| ATOM | 7235 | CB  | VAL | 317 | 11.328 | -70.799 | 24.667 | 1.00 | 0.00 |
| C    |      |     |     |     |        |         |        |      |      |
| ATOM | 7236 | CG1 | VAL | 317 | 10.571 | -71.149 | 23.332 | 1.00 | 0.00 |
| C    |      |     |     |     |        |         |        |      |      |
| ATOM | 7237 | CG2 | VAL | 317 | 11.983 | -72.185 | 25.076 | 1.00 | 0.00 |
| C    |      |     |     |     |        |         |        |      |      |
| ATOM | 7238 | C   | VAL | 317 | 11.685 | -68.440 | 23.856 | 1.00 | 0.00 |
| C    |      |     |     |     |        |         |        |      |      |
| ATOM | 7239 | O   | VAL | 317 | 11.067 | -67.656 | 24.576 | 1.00 | 0.00 |
| O    |      |     |     |     |        |         |        |      |      |
| ATOM | 7240 | N   | LEU | 318 | 11.623 | -68.339 | 22.535 | 1.00 | 0.00 |
| N    |      |     |     |     |        |         |        |      |      |
| ATOM | 7241 | CA  | LEU | 318 | 11.073 | -67.222 | 21.792 | 1.00 | 0.00 |
| C    |      |     |     |     |        |         |        |      |      |
| ATOM | 7242 | CB  | LEU | 318 | 12.216 | -66.608 | 21.054 | 1.00 | 0.00 |
| C    |      |     |     |     |        |         |        |      |      |
| ATOM | 7243 | CG  | LEU | 318 | 13.180 | -65.844 | 21.869 | 1.00 | 0.00 |
| C    |      |     |     |     |        |         |        |      |      |
| ATOM | 7244 | CD1 | LEU | 318 | 14.373 | -65.503 | 20.999 | 1.00 | 0.00 |
| C    |      |     |     |     |        |         |        |      |      |
| ATOM | 7245 | CD2 | LEU | 318 | 12.695 | -64.441 | 22.315 | 1.00 | 0.00 |
| C    |      |     |     |     |        |         |        |      |      |
| ATOM | 7246 | C   | LEU | 318 | 10.006 | -67.738 | 20.734 | 1.00 | 0.00 |
| C    |      |     |     |     |        |         |        |      |      |
| ATOM | 7247 | O   | LEU | 318 | 8.880  | -67.218 | 20.678 | 1.00 | 0.00 |
| O    |      |     |     |     |        |         |        |      |      |
| ATOM | 7248 | N   | GLU | 319 | 10.302 | -68.798 | 19.894 | 1.00 | 0.00 |
| N    |      |     |     |     |        |         |        |      |      |
| ATOM | 7249 | CA  | GLU | 319 | 9.301  | -69.368 | 18.972 | 1.00 | 0.00 |
| C    |      |     |     |     |        |         |        |      |      |
| ATOM | 7250 | CB  | GLU | 319 | 9.385  | -68.793 | 17.573 | 1.00 | 0.00 |
| C    |      |     |     |     |        |         |        |      |      |
| ATOM | 7251 | CG  | GLU | 319 | 9.032  | -67.354 | 17.582 | 1.00 | 0.00 |
| C    |      |     |     |     |        |         |        |      |      |
| ATOM | 7252 | CD  | GLU | 319 | 8.905  | -66.824 | 16.098 | 1.00 | 0.00 |
| C    |      |     |     |     |        |         |        |      |      |
| ATOM | 7253 | OE1 | GLU | 319 | 7.785  | -66.421 | 15.741 | 1.00 | 0.00 |
| O    |      |     |     |     |        |         |        |      |      |



|      |      |     |     |     |        |         |        |      |      |
|------|------|-----|-----|-----|--------|---------|--------|------|------|
| ATOM | 7254 | OE2 | GLU | 319 | 9.840  | -66.960 | 15.305 | 1.00 | 0.00 |
| O1-  |      |     |     |     |        |         |        |      |      |
| ATOM | 7255 | C   | GLU | 319 | 9.518  | -70.910 | 18.859 | 1.00 | 0.00 |
| C    |      |     |     |     |        |         |        |      |      |
| ATOM | 7256 | O   | GLU | 319 | 10.504 | -71.417 | 18.354 | 1.00 | 0.00 |
| O    |      |     |     |     |        |         |        |      |      |
| ATOM | 7257 | N   | LEU | 320 | 8.509  | -71.702 | 19.215 | 1.00 | 0.00 |
| N    |      |     |     |     |        |         |        |      |      |
| ATOM | 7258 | CA  | LEU | 320 | 8.525  | -73.083 | 18.909 | 1.00 | 0.00 |
| C    |      |     |     |     |        |         |        |      |      |
| ATOM | 7259 | CB  | LEU | 320 | 7.695  | -73.930 | 19.992 | 1.00 | 0.00 |
| C    |      |     |     |     |        |         |        |      |      |
| ATOM | 7260 | CG  | LEU | 320 | 8.016  | -73.645 | 21.436 | 1.00 | 0.00 |
| C    |      |     |     |     |        |         |        |      |      |
| ATOM | 7261 | CD1 | LEU | 320 | 6.907  | -74.030 | 22.402 | 1.00 | 0.00 |
| C    |      |     |     |     |        |         |        |      |      |
| ATOM | 7262 | CD2 | LEU | 320 | 9.254  | -74.414 | 21.653 | 1.00 | 0.00 |
| C    |      |     |     |     |        |         |        |      |      |
| ATOM | 7263 | C   | LEU | 320 | 7.935  | -73.246 | 17.490 | 1.00 | 0.00 |
| C    |      |     |     |     |        |         |        |      |      |
| ATOM | 7264 | O   | LEU | 320 | 7.090  | -72.411 | 17.081 | 1.00 | 0.00 |
| O    |      |     |     |     |        |         |        |      |      |
| ATOM | 7265 | N   | ARG | 321 | 8.568  | -74.071 | 16.604 | 1.00 | 0.00 |
| N    |      |     |     |     |        |         |        |      |      |
| ATOM | 7266 | CA  | ARG | 321 | 8.255  | -74.223 | 15.228 | 1.00 | 0.00 |
| C    |      |     |     |     |        |         |        |      |      |
| ATOM | 7267 | CB  | ARG | 321 | 9.300  | -73.616 | 14.384 | 1.00 | 0.00 |
| C    |      |     |     |     |        |         |        |      |      |
| ATOM | 7268 | CG  | ARG | 321 | 9.362  | -72.061 | 14.484 | 1.00 | 0.00 |
| C    |      |     |     |     |        |         |        |      |      |
| ATOM | 7269 | CD  | ARG | 321 | 10.442 | -71.559 | 13.582 | 1.00 | 0.00 |
| C    |      |     |     |     |        |         |        |      |      |
| ATOM | 7270 | NE  | ARG | 321 | 10.743 | -70.155 | 13.901 | 1.00 | 0.00 |
| N    |      |     |     |     |        |         |        |      |      |
| ATOM | 7271 | CZ  | ARG | 321 | 11.689 | -69.360 | 13.421 | 1.00 | 0.00 |
| C    |      |     |     |     |        |         |        |      |      |
| ATOM | 7272 | NH1 | ARG | 321 | 11.635 | -68.091 | 13.683 | 1.00 | 0.00 |
| N    |      |     |     |     |        |         |        |      |      |
| ATOM | 7273 | NH2 | ARG | 321 | 12.733 | -69.842 | 12.795 | 1.00 | 0.00 |
| N1+  |      |     |     |     |        |         |        |      |      |
| ATOM | 7274 | C   | ARG | 321 | 8.031  | -75.681 | 14.862 | 1.00 | 0.00 |
| C    |      |     |     |     |        |         |        |      |      |
| ATOM | 7275 | O   | ARG | 321 | 8.851  | -76.579 | 15.200 | 1.00 | 0.00 |
| O    |      |     |     |     |        |         |        |      |      |
| ATOM | 7276 | N   | THR | 322 | 6.892  | -76.068 | 14.344 | 1.00 | 0.00 |
| N    |      |     |     |     |        |         |        |      |      |
| ATOM | 7277 | CA  | THR | 322 | 6.539  | -77.410 | 13.840 | 1.00 | 0.00 |
| C    |      |     |     |     |        |         |        |      |      |
| ATOM | 7278 | CB  | THR | 322 | 4.991  | -77.588 | 13.780 | 1.00 | 0.00 |
| C    |      |     |     |     |        |         |        |      |      |
| ATOM | 7279 | CG2 | THR | 322 | 4.559  | -78.863 | 13.092 | 1.00 | 0.00 |
| C    |      |     |     |     |        |         |        |      |      |
| ATOM | 7280 | OG1 | THR | 322 | 4.424  | -77.643 | 15.114 | 1.00 | 0.00 |
| O    |      |     |     |     |        |         |        |      |      |

|      |      |     |     |     |        |         |        |      |      |
|------|------|-----|-----|-----|--------|---------|--------|------|------|
| ATOM | 7281 | C   | THR | 322 | 7.279  | -77.569 | 12.480 | 1.00 | 0.00 |
| C    |      |     |     |     |        |         |        |      |      |
| ATOM | 7282 | O   | THR | 322 | 7.487  | -76.595 | 11.794 | 1.00 | 0.00 |
| O    |      |     |     |     |        |         |        |      |      |
| ATOM | 7283 | N   | GLN | 323 | 7.701  | -78.767 | 12.209 | 1.00 | 0.00 |
| N    |      |     |     |     |        |         |        |      |      |
| ATOM | 7284 | CA  | GLN | 323 | 8.681  | -79.038 | 11.100 | 1.00 | 0.00 |
| C    |      |     |     |     |        |         |        |      |      |
| ATOM | 7285 | CB  | GLN | 323 | 10.178 | -78.817 | 11.659 | 1.00 | 0.00 |
| C    |      |     |     |     |        |         |        |      |      |
| ATOM | 7286 | CG  | GLN | 323 | 11.399 | -79.362 | 10.897 | 1.00 | 0.00 |
| C    |      |     |     |     |        |         |        |      |      |
| ATOM | 7287 | CD  | GLN | 323 | 12.601 | -78.405 | 10.725 | 1.00 | 0.00 |
| C    |      |     |     |     |        |         |        |      |      |
| ATOM | 7288 | OE1 | GLN | 323 | 12.626 | -77.252 | 10.962 | 1.00 | 0.00 |
| O    |      |     |     |     |        |         |        |      |      |
| ATOM | 7289 | NE2 | GLN | 323 | 13.640 | -78.896 | 10.149 | 1.00 | 0.00 |
| N    |      |     |     |     |        |         |        |      |      |
| ATOM | 7290 | C   | GLN | 323 | 8.512  | -80.461 | 10.619 | 1.00 | 0.00 |
| C    |      |     |     |     |        |         |        |      |      |
| ATOM | 7291 | O   | GLN | 323 | 8.265  | -81.362 | 11.376 | 1.00 | 0.00 |
| O    |      |     |     |     |        |         |        |      |      |
| ATOM | 7292 | N   | SER | 324 | 8.616  | -80.749 | 9.285  | 1.00 | 0.00 |
| N    |      |     |     |     |        |         |        |      |      |
| ATOM | 7293 | CA  | SER | 324 | 8.389  | -82.091 | 8.649  | 1.00 | 0.00 |
| C    |      |     |     |     |        |         |        |      |      |
| ATOM | 7294 | CB  | SER | 324 | 8.161  | -81.991 | 7.179  | 1.00 | 0.00 |
| C    |      |     |     |     |        |         |        |      |      |
| ATOM | 7295 | OG  | SER | 324 | 7.133  | -81.036 | 6.998  | 1.00 | 0.00 |
| O    |      |     |     |     |        |         |        |      |      |
| ATOM | 7296 | C   | SER | 324 | 9.359  | -83.224 | 8.919  | 1.00 | 0.00 |
| C    |      |     |     |     |        |         |        |      |      |
| ATOM | 7297 | O   | SER | 324 | 9.089  | -84.420 | 8.587  | 1.00 | 0.00 |
| O    |      |     |     |     |        |         |        |      |      |
| ATOM | 7298 | N   | ASP | 325 | 10.408 | -82.849 | 9.690  | 1.00 | 0.00 |
| N    |      |     |     |     |        |         |        |      |      |
| ATOM | 7299 | CA  | ASP | 325 | 11.364 | -83.901 | 10.212 | 1.00 | 0.00 |
| C    |      |     |     |     |        |         |        |      |      |
| ATOM | 7300 | CB  | ASP | 325 | 12.655 | -83.221 | 10.637 | 1.00 | 0.00 |
| C    |      |     |     |     |        |         |        |      |      |
| ATOM | 7301 | CG  | ASP | 325 | 13.418 | -82.584 | 9.493  | 1.00 | 0.00 |
| C    |      |     |     |     |        |         |        |      |      |
| ATOM | 7302 | OD1 | ASP | 325 | 14.021 | -81.511 | 9.606  | 1.00 | 0.00 |
| O    |      |     |     |     |        |         |        |      |      |
| ATOM | 7303 | OD2 | ASP | 325 | 13.501 | -83.204 | 8.418  | 1.00 | 0.00 |
| O1-  |      |     |     |     |        |         |        |      |      |
| ATOM | 7304 | C   | ASP | 325 | 10.674 | -84.701 | 11.401 | 1.00 | 0.00 |
| C    |      |     |     |     |        |         |        |      |      |
| ATOM | 7305 | O   | ASP | 325 | 11.318 | -85.521 | 12.036 | 1.00 | 0.00 |
| O    |      |     |     |     |        |         |        |      |      |
| ATOM | 7306 | N   | GLY | 326 | 9.377  | -84.471 | 11.621 | 1.00 | 0.00 |
| N    |      |     |     |     |        |         |        |      |      |
| ATOM | 7307 | CA  | GLY | 326 | 8.520  | -85.091 | 12.643 | 1.00 | 0.00 |
| C    |      |     |     |     |        |         |        |      |      |

|      |      |     |     |     |        |         |        |      |      |
|------|------|-----|-----|-----|--------|---------|--------|------|------|
| ATOM | 7308 | C   | GLY | 326 | 8.738  | -84.247 | 13.887 | 1.00 | 0.00 |
| C    |      |     |     |     |        |         |        |      |      |
| ATOM | 7309 | O   | GLY | 326 | 7.755  | -83.934 | 14.556 | 1.00 | 0.00 |
| O    |      |     |     |     |        |         |        |      |      |
| ATOM | 7310 | N   | ILE | 327 | 9.994  | -84.018 | 14.161 | 1.00 | 0.00 |
| N    |      |     |     |     |        |         |        |      |      |
| ATOM | 7311 | CA  | ILE | 327 | 10.431 | -83.230 | 15.302 | 1.00 | 0.00 |
| C    |      |     |     |     |        |         |        |      |      |
| ATOM | 7312 | CB  | ILE | 327 | 11.995 | -83.513 | 15.459 | 1.00 | 0.00 |
| C    |      |     |     |     |        |         |        |      |      |
| ATOM | 7313 | CG2 | ILE | 327 | 12.949 | -82.435 | 16.099 | 1.00 | 0.00 |
| C    |      |     |     |     |        |         |        |      |      |
| ATOM | 7314 | CG1 | ILE | 327 | 12.066 | -84.817 | 16.321 | 1.00 | 0.00 |
| C    |      |     |     |     |        |         |        |      |      |
| ATOM | 7315 | CD1 | ILE | 327 | 12.049 | -86.123 | 15.570 | 1.00 | 0.00 |
| C    |      |     |     |     |        |         |        |      |      |
| ATOM | 7316 | C   | ILE | 327 | 10.163 | -81.676 | 15.258 | 1.00 | 0.00 |
| C    |      |     |     |     |        |         |        |      |      |
| ATOM | 7317 | O   | ILE | 327 | 10.160 | -81.005 | 14.195 | 1.00 | 0.00 |
| O    |      |     |     |     |        |         |        |      |      |
| ATOM | 7318 | N   | GLN | 328 | 9.901  | -81.133 | 16.422 | 1.00 | 0.00 |
| N    |      |     |     |     |        |         |        |      |      |
| ATOM | 7319 | CA  | GLN | 328 | 9.882  | -79.682 | 16.585 | 1.00 | 0.00 |
| C    |      |     |     |     |        |         |        |      |      |
| ATOM | 7320 | CB  | GLN | 328 | 9.068  | -79.400 | 17.841 | 1.00 | 0.00 |
| C    |      |     |     |     |        |         |        |      |      |
| ATOM | 7321 | CG  | GLN | 328 | 7.570  | -79.302 | 17.570 | 1.00 | 0.00 |
| C    |      |     |     |     |        |         |        |      |      |
| ATOM | 7322 | CD  | GLN | 328 | 6.765  | -78.890 | 18.766 | 1.00 | 0.00 |
| C    |      |     |     |     |        |         |        |      |      |
| ATOM | 7323 | OE1 | GLN | 328 | 7.222  | -79.076 | 19.922 | 1.00 | 0.00 |
| O    |      |     |     |     |        |         |        |      |      |
| ATOM | 7324 | NE2 | GLN | 328 | 5.642  | -78.224 | 18.650 | 1.00 | 0.00 |
| N    |      |     |     |     |        |         |        |      |      |
| ATOM | 7325 | C   | GLN | 328 | 11.199 | -78.994 | 16.741 | 1.00 | 0.00 |
| C    |      |     |     |     |        |         |        |      |      |
| ATOM | 7326 | O   | GLN | 328 | 12.193 | -79.623 | 17.131 | 1.00 | 0.00 |
| O    |      |     |     |     |        |         |        |      |      |
| ATOM | 7327 | N   | GLN | 329 | 11.177 | -77.783 | 16.401 | 1.00 | 0.00 |
| N    |      |     |     |     |        |         |        |      |      |
| ATOM | 7328 | CA  | GLN | 329 | 12.252 | -76.839 | 16.734 | 1.00 | 0.00 |
| C    |      |     |     |     |        |         |        |      |      |
| ATOM | 7329 | CB  | GLN | 329 | 12.589 | -76.106 | 15.423 | 1.00 | 0.00 |
| C    |      |     |     |     |        |         |        |      |      |
| ATOM | 7330 | CG  | GLN | 329 | 12.875 | -76.958 | 14.136 | 1.00 | 0.00 |
| C    |      |     |     |     |        |         |        |      |      |
| ATOM | 7331 | CD  | GLN | 329 | 13.963 | -77.959 | 14.362 | 1.00 | 0.00 |
| C    |      |     |     |     |        |         |        |      |      |
| ATOM | 7332 | OE1 | GLN | 329 | 15.064 | -77.614 | 14.765 | 1.00 | 0.00 |
| O    |      |     |     |     |        |         |        |      |      |
| ATOM | 7333 | NE2 | GLN | 329 | 13.625 | -79.218 | 14.399 | 1.00 | 0.00 |
| N    |      |     |     |     |        |         |        |      |      |
| ATOM | 7334 | C   | GLN | 329 | 11.845 | -75.814 | 17.855 | 1.00 | 0.00 |
| C    |      |     |     |     |        |         |        |      |      |

|      |      |     |     |     |        |         |        |      |      |
|------|------|-----|-----|-----|--------|---------|--------|------|------|
| ATOM | 7335 | O   | GLN | 329 | 10.698 | -75.555 | 18.146 | 1.00 | 0.00 |
| O    |      |     |     |     |        |         |        |      |      |
| ATOM | 7336 | N   | ALA | 330 | 12.841 | -75.154 | 18.388 | 1.00 | 0.00 |
| N    |      |     |     |     |        |         |        |      |      |
| ATOM | 7337 | CA  | ALA | 330 | 12.624 | -73.997 | 19.239 | 1.00 | 0.00 |
| C    |      |     |     |     |        |         |        |      |      |
| ATOM | 7338 | CB  | ALA | 330 | 12.816 | -74.484 | 20.709 | 1.00 | 0.00 |
| C    |      |     |     |     |        |         |        |      |      |
| ATOM | 7339 | C   | ALA | 330 | 13.687 | -72.925 | 18.910 | 1.00 | 0.00 |
| C    |      |     |     |     |        |         |        |      |      |
| ATOM | 7340 | O   | ALA | 330 | 14.925 | -73.169 | 18.981 | 1.00 | 0.00 |
| O    |      |     |     |     |        |         |        |      |      |
| ATOM | 7341 | N   | LYS | 331 | 13.203 | -71.729 | 18.652 | 1.00 | 0.00 |
| N    |      |     |     |     |        |         |        |      |      |
| ATOM | 7342 | CA  | LYS | 331 | 13.917 | -70.427 | 18.686 | 1.00 | 0.00 |
| C    |      |     |     |     |        |         |        |      |      |
| ATOM | 7343 | CB  | LYS | 331 | 13.283 | -69.282 | 17.868 | 1.00 | 0.00 |
| C    |      |     |     |     |        |         |        |      |      |
| ATOM | 7344 | CG  | LYS | 331 | 14.215 | -68.090 | 17.682 | 1.00 | 0.00 |
| C    |      |     |     |     |        |         |        |      |      |
| ATOM | 7345 | CD  | LYS | 331 | 13.620 | -67.160 | 16.601 | 1.00 | 0.00 |
| C    |      |     |     |     |        |         |        |      |      |
| ATOM | 7346 | CE  | LYS | 331 | 14.672 | -66.084 | 16.419 | 1.00 | 0.00 |
| C    |      |     |     |     |        |         |        |      |      |
| ATOM | 7347 | NZ  | LYS | 331 | 14.391 | -65.042 | 15.450 | 1.00 | 0.00 |
| N1+  |      |     |     |     |        |         |        |      |      |
| ATOM | 7348 | C   | LYS | 331 | 14.241 | -69.967 | 20.150 | 1.00 | 0.00 |
| C    |      |     |     |     |        |         |        |      |      |
| ATOM | 7349 | O   | LYS | 331 | 13.352 | -69.849 | 20.943 | 1.00 | 0.00 |
| O    |      |     |     |     |        |         |        |      |      |
| ATOM | 7350 | N   | VAL | 332 | 15.500 | -69.927 | 20.537 | 1.00 | 0.00 |
| N    |      |     |     |     |        |         |        |      |      |
| ATOM | 7351 | CA  | VAL | 332 | 15.901 | -69.670 | 21.959 | 1.00 | 0.00 |
| C    |      |     |     |     |        |         |        |      |      |
| ATOM | 7352 | CB  | VAL | 332 | 16.496 | -71.032 | 22.531 | 1.00 | 0.00 |
| C    |      |     |     |     |        |         |        |      |      |
| ATOM | 7353 | CG1 | VAL | 332 | 15.613 | -72.260 | 22.218 | 1.00 | 0.00 |
| C    |      |     |     |     |        |         |        |      |      |
| ATOM | 7354 | CG2 | VAL | 332 | 17.909 | -71.418 | 22.311 | 1.00 | 0.00 |
| C    |      |     |     |     |        |         |        |      |      |
| ATOM | 7355 | C   | VAL | 332 | 16.907 | -68.492 | 22.157 | 1.00 | 0.00 |
| C    |      |     |     |     |        |         |        |      |      |
| ATOM | 7356 | O   | VAL | 332 | 17.662 | -68.155 | 21.253 | 1.00 | 0.00 |
| O    |      |     |     |     |        |         |        |      |      |
| ATOM | 7357 | N   | GLN | 333 | 16.953 | -67.936 | 23.354 | 1.00 | 0.00 |
| N    |      |     |     |     |        |         |        |      |      |
| ATOM | 7358 | CA  | GLN | 333 | 18.074 | -67.058 | 23.696 | 1.00 | 0.00 |
| C    |      |     |     |     |        |         |        |      |      |
| ATOM | 7359 | CB  | GLN | 333 | 17.408 | -65.732 | 23.926 | 1.00 | 0.00 |
| C    |      |     |     |     |        |         |        |      |      |
| ATOM | 7360 | CG  | GLN | 333 | 18.400 | -64.570 | 24.060 | 1.00 | 0.00 |
| C    |      |     |     |     |        |         |        |      |      |
| ATOM | 7361 | CD  | GLN | 333 | 17.662 | -63.152 | 24.011 | 1.00 | 0.00 |
| C    |      |     |     |     |        |         |        |      |      |

|      |      |     |     |     |        |         |        |      |      |
|------|------|-----|-----|-----|--------|---------|--------|------|------|
| ATOM | 7362 | OE1 | GLN | 333 | 16.634 | -63.009 | 23.395 | 1.00 | 0.00 |
| O    |      |     |     |     |        |         |        |      |      |
| ATOM | 7363 | NE2 | GLN | 333 | 18.231 | -62.076 | 24.448 | 1.00 | 0.00 |
| N    |      |     |     |     |        |         |        |      |      |
| ATOM | 7364 | C   | GLN | 333 | 18.757 | -67.540 | 24.976 | 1.00 | 0.00 |
| C    |      |     |     |     |        |         |        |      |      |
| ATOM | 7365 | O   | GLN | 333 | 18.124 | -67.879 | 25.981 | 1.00 | 0.00 |
| O    |      |     |     |     |        |         |        |      |      |
| ATOM | 7366 | N   | ILE | 334 | 20.102 | -67.628 | 24.968 | 1.00 | 0.00 |
| N    |      |     |     |     |        |         |        |      |      |
| ATOM | 7367 | CA  | ILE | 334 | 20.899 | -68.318 | 26.053 | 1.00 | 0.00 |
| C    |      |     |     |     |        |         |        |      |      |
| ATOM | 7368 | CB  | ILE | 334 | 22.334 | -68.637 | 25.563 | 1.00 | 0.00 |
| C    |      |     |     |     |        |         |        |      |      |
| ATOM | 7369 | CG2 | ILE | 334 | 23.051 | -69.375 | 26.696 | 1.00 | 0.00 |
| C    |      |     |     |     |        |         |        |      |      |
| ATOM | 7370 | CG1 | ILE | 334 | 22.553 | -69.552 | 24.245 | 1.00 | 0.00 |
| C    |      |     |     |     |        |         |        |      |      |
| ATOM | 7371 | CD1 | ILE | 334 | 21.702 | -70.868 | 24.161 | 1.00 | 0.00 |
| C    |      |     |     |     |        |         |        |      |      |
| ATOM | 7372 | C   | ILE | 334 | 20.833 | -67.568 | 27.422 | 1.00 | 0.00 |
| C    |      |     |     |     |        |         |        |      |      |
| ATOM | 7373 | O   | ILE | 334 | 21.003 | -66.371 | 27.415 | 1.00 | 0.00 |
| O    |      |     |     |     |        |         |        |      |      |
| ATOM | 7374 | N   | LEU | 335 | 20.596 | -68.228 | 28.590 | 1.00 | 0.00 |
| N    |      |     |     |     |        |         |        |      |      |
| ATOM | 7375 | CA  | LEU | 335 | 20.524 | -67.603 | 29.909 | 1.00 | 0.00 |
| C    |      |     |     |     |        |         |        |      |      |
| ATOM | 7376 | CB  | LEU | 335 | 19.620 | -68.468 | 30.791 | 1.00 | 0.00 |
| C    |      |     |     |     |        |         |        |      |      |
| ATOM | 7377 | CG  | LEU | 335 | 18.120 | -68.189 | 30.460 | 1.00 | 0.00 |
| C    |      |     |     |     |        |         |        |      |      |
| ATOM | 7378 | CD1 | LEU | 335 | 17.278 | -68.833 | 31.567 | 1.00 | 0.00 |
| C    |      |     |     |     |        |         |        |      |      |
| ATOM | 7379 | CD2 | LEU | 335 | 17.690 | -66.699 | 30.411 | 1.00 | 0.00 |
| C    |      |     |     |     |        |         |        |      |      |
| ATOM | 7380 | C   | LEU | 335 | 21.909 | -67.387 | 30.639 | 1.00 | 0.00 |
| C    |      |     |     |     |        |         |        |      |      |
| ATOM | 7381 | O   | LEU | 335 | 22.641 | -68.343 | 31.020 | 1.00 | 0.00 |
| O    |      |     |     |     |        |         |        |      |      |
| ATOM | 7382 | N   | PRO | 336 | 22.319 | -66.106 | 30.910 | 1.00 | 0.00 |
| N    |      |     |     |     |        |         |        |      |      |
| ATOM | 7383 | CD  | PRO | 336 | 21.810 | -64.857 | 30.435 | 1.00 | 0.00 |
| C    |      |     |     |     |        |         |        |      |      |
| ATOM | 7384 | CG  | PRO | 336 | 22.949 | -63.971 | 30.293 | 1.00 | 0.00 |
| C    |      |     |     |     |        |         |        |      |      |
| ATOM | 7385 | CB  | PRO | 336 | 23.891 | -64.324 | 31.429 | 1.00 | 0.00 |
| C    |      |     |     |     |        |         |        |      |      |
| ATOM | 7386 | CA  | PRO | 336 | 23.609 | -65.835 | 31.593 | 1.00 | 0.00 |
| C    |      |     |     |     |        |         |        |      |      |
| ATOM | 7387 | C   | PRO | 336 | 23.335 | -66.159 | 33.084 | 1.00 | 0.00 |
| C    |      |     |     |     |        |         |        |      |      |
| ATOM | 7388 | O   | PRO | 336 | 22.230 | -66.132 | 33.638 | 1.00 | 0.00 |
| O    |      |     |     |     |        |         |        |      |      |

|      |      |     |     |     |        |         |        |      |      |
|------|------|-----|-----|-----|--------|---------|--------|------|------|
| ATOM | 7389 | N   | GLU | 337 | 24.399 | -66.324 | 33.886 | 1.00 | 0.00 |
| N    |      |     |     |     |        |         |        |      |      |
| ATOM | 7390 | CA  | GLU | 337 | 24.435 | -66.153 | 35.384 | 1.00 | 0.00 |
| C    |      |     |     |     |        |         |        |      |      |
| ATOM | 7391 | CB  | GLU | 337 | 25.573 | -66.881 | 36.034 | 1.00 | 0.00 |
| C    |      |     |     |     |        |         |        |      |      |
| ATOM | 7392 | CG  | GLU | 337 | 25.750 | -68.366 | 35.571 | 1.00 | 0.00 |
| C    |      |     |     |     |        |         |        |      |      |
| ATOM | 7393 | CD  | GLU | 337 | 24.509 | -69.334 | 35.716 | 1.00 | 0.00 |
| C    |      |     |     |     |        |         |        |      |      |
| ATOM | 7394 | OE1 | GLU | 337 | 24.062 | -69.567 | 36.877 | 1.00 | 0.00 |
| O    |      |     |     |     |        |         |        |      |      |
| ATOM | 7395 | OE2 | GLU | 337 | 24.148 | -70.034 | 34.735 | 1.00 | 0.00 |
| O1-  |      |     |     |     |        |         |        |      |      |
| ATOM | 7396 | C   | GLU | 337 | 24.391 | -64.586 | 35.748 | 1.00 | 0.00 |
| C    |      |     |     |     |        |         |        |      |      |
| ATOM | 7397 | O   | GLU | 337 | 25.201 | -63.771 | 35.242 | 1.00 | 0.00 |
| O    |      |     |     |     |        |         |        |      |      |
| ATOM | 7398 | N   | CYS | 338 | 23.740 | -64.278 | 36.873 | 1.00 | 0.00 |
| N    |      |     |     |     |        |         |        |      |      |
| ATOM | 7399 | CA  | CYS | 338 | 23.930 | -63.046 | 37.633 | 1.00 | 0.00 |
| C    |      |     |     |     |        |         |        |      |      |
| ATOM | 7400 | CB  | CYS | 338 | 22.781 | -62.785 | 38.587 | 1.00 | 0.00 |
| C    |      |     |     |     |        |         |        |      |      |
| ATOM | 7401 | SG  | CYS | 338 | 21.213 | -63.189 | 37.757 | 1.00 | 0.00 |
| S    |      |     |     |     |        |         |        |      |      |
| ATOM | 7402 | C   | CYS | 338 | 25.208 | -63.100 | 38.465 | 1.00 | 0.00 |
| C    |      |     |     |     |        |         |        |      |      |
| ATOM | 7403 | O   | CYS | 338 | 25.642 | -64.158 | 38.899 | 1.00 | 0.00 |
| O    |      |     |     |     |        |         |        |      |      |
| ATOM | 7404 | N   | VAL | 339 | 25.768 | -61.914 | 38.824 | 1.00 | 0.00 |
| N    |      |     |     |     |        |         |        |      |      |
| ATOM | 7405 | CA  | VAL | 339 | 26.650 | -61.641 | 39.944 | 1.00 | 0.00 |
| C    |      |     |     |     |        |         |        |      |      |
| ATOM | 7406 | CB  | VAL | 339 | 26.798 | -60.058 | 40.142 | 1.00 | 0.00 |
| C    |      |     |     |     |        |         |        |      |      |
| ATOM | 7407 | CG1 | VAL | 339 | 25.475 | -59.398 | 40.468 | 1.00 | 0.00 |
| C    |      |     |     |     |        |         |        |      |      |
| ATOM | 7408 | CG2 | VAL | 339 | 27.907 | -59.560 | 41.083 | 1.00 | 0.00 |
| C    |      |     |     |     |        |         |        |      |      |
| ATOM | 7409 | C   | VAL | 339 | 26.178 | -62.314 | 41.238 | 1.00 | 0.00 |
| C    |      |     |     |     |        |         |        |      |      |
| ATOM | 7410 | O   | VAL | 339 | 24.975 | -62.427 | 41.486 | 1.00 | 0.00 |
| O    |      |     |     |     |        |         |        |      |      |
| ATOM | 7411 | N   | LEU | 340 | 27.142 | -62.877 | 41.964 | 1.00 | 0.00 |
| N    |      |     |     |     |        |         |        |      |      |
| ATOM | 7412 | CA  | LEU | 340 | 26.891 | -63.608 | 43.197 | 1.00 | 0.00 |
| C    |      |     |     |     |        |         |        |      |      |
| ATOM | 7413 | CB  | LEU | 340 | 27.906 | -64.775 | 43.375 | 1.00 | 0.00 |
| C    |      |     |     |     |        |         |        |      |      |
| ATOM | 7414 | CG  | LEU | 340 | 27.735 | -65.878 | 42.313 | 1.00 | 0.00 |
| C    |      |     |     |     |        |         |        |      |      |
| ATOM | 7415 | CD1 | LEU | 340 | 28.495 | -67.163 | 42.593 | 1.00 | 0.00 |
| C    |      |     |     |     |        |         |        |      |      |

|      |      |     |     |     |        |         |        |      |      |
|------|------|-----|-----|-----|--------|---------|--------|------|------|
| ATOM | 7416 | CD2 | LEU | 340 | 26.299 | -66.275 | 41.819 | 1.00 | 0.00 |
| C    |      |     |     |     |        |         |        |      |      |
| ATOM | 7417 | C   | LEU | 340 | 27.041 | -62.716 | 44.445 | 1.00 | 0.00 |
| C    |      |     |     |     |        |         |        |      |      |
| ATOM | 7418 | O   | LEU | 340 | 28.139 | -62.350 | 44.851 | 1.00 | 0.00 |
| O    |      |     |     |     |        |         |        |      |      |
| ATOM | 7419 | N   | PRO | 341 | 26.028 | -62.500 | 45.289 | 1.00 | 0.00 |
| N    |      |     |     |     |        |         |        |      |      |
| ATOM | 7420 | CD  | PRO | 341 | 24.603 | -62.733 | 44.911 | 1.00 | 0.00 |
| C    |      |     |     |     |        |         |        |      |      |
| ATOM | 7421 | CG  | PRO | 341 | 23.796 | -62.042 | 45.967 | 1.00 | 0.00 |
| C    |      |     |     |     |        |         |        |      |      |
| ATOM | 7422 | CB  | PRO | 341 | 24.734 | -61.680 | 47.175 | 1.00 | 0.00 |
| C    |      |     |     |     |        |         |        |      |      |
| ATOM | 7423 | CA  | PRO | 341 | 26.176 | -61.854 | 46.575 | 1.00 | 0.00 |
| C    |      |     |     |     |        |         |        |      |      |
| ATOM | 7424 | C   | PRO | 341 | 27.133 | -62.576 | 47.521 | 1.00 | 0.00 |
| C    |      |     |     |     |        |         |        |      |      |
| ATOM | 7425 | O   | PRO | 341 | 27.140 | -63.838 | 47.585 | 1.00 | 0.00 |
| O    |      |     |     |     |        |         |        |      |      |
| ATOM | 7426 | N   | SER | 342 | 28.014 | -61.856 | 48.120 | 1.00 | 0.00 |
| N    |      |     |     |     |        |         |        |      |      |
| ATOM | 7427 | CA  | SER | 342 | 29.169 | -62.325 | 48.932 | 1.00 | 0.00 |
| C    |      |     |     |     |        |         |        |      |      |
| ATOM | 7428 | CB  | SER | 342 | 30.389 | -62.495 | 48.005 | 1.00 | 0.00 |
| C    |      |     |     |     |        |         |        |      |      |
| ATOM | 7429 | OG  | SER | 342 | 30.174 | -63.289 | 46.870 | 1.00 | 0.00 |
| O    |      |     |     |     |        |         |        |      |      |
| ATOM | 7430 | C   | SER | 342 | 29.355 | -61.407 | 50.137 | 1.00 | 0.00 |
| C    |      |     |     |     |        |         |        |      |      |
| ATOM | 7431 | O   | SER | 342 | 30.431 | -60.987 | 50.510 | 1.00 | 0.00 |
| O    |      |     |     |     |        |         |        |      |      |
| ATOM | 7432 | N   | THR | 343 | 28.233 | -61.002 | 50.772 | 1.00 | 0.00 |
| N    |      |     |     |     |        |         |        |      |      |
| ATOM | 7433 | CA  | THR | 343 | 28.043 | -59.765 | 51.474 | 1.00 | 0.00 |
| C    |      |     |     |     |        |         |        |      |      |
| ATOM | 7434 | CB  | THR | 343 | 26.533 | -59.401 | 51.533 | 1.00 | 0.00 |
| C    |      |     |     |     |        |         |        |      |      |
| ATOM | 7435 | CG2 | THR | 343 | 25.841 | -59.524 | 50.192 | 1.00 | 0.00 |
| C    |      |     |     |     |        |         |        |      |      |
| ATOM | 7436 | OG1 | THR | 343 | 25.788 | -60.207 | 52.455 | 1.00 | 0.00 |
| O    |      |     |     |     |        |         |        |      |      |
| ATOM | 7437 | C   | THR | 343 | 28.716 | -59.663 | 52.864 | 1.00 | 0.00 |
| C    |      |     |     |     |        |         |        |      |      |
| ATOM | 7438 | O   | THR | 343 | 28.983 | -58.578 | 53.316 | 1.00 | 0.00 |
| O    |      |     |     |     |        |         |        |      |      |
| ATOM | 7439 | N   | MET | 344 | 29.055 | -60.842 | 53.528 | 1.00 | 0.00 |
| N    |      |     |     |     |        |         |        |      |      |
| ATOM | 7440 | CA  | MET | 344 | 29.744 | -60.923 | 54.865 | 1.00 | 0.00 |
| C    |      |     |     |     |        |         |        |      |      |
| ATOM | 7441 | CB  | MET | 344 | 30.014 | -62.407 | 55.278 | 1.00 | 0.00 |
| C    |      |     |     |     |        |         |        |      |      |
| ATOM | 7442 | CG  | MET | 344 | 28.866 | -63.379 | 55.576 | 1.00 | 0.00 |
| C    |      |     |     |     |        |         |        |      |      |

|      |      |     |     |     |        |         |        |      |      |
|------|------|-----|-----|-----|--------|---------|--------|------|------|
| ATOM | 7443 | SD  | MET | 344 | 27.822 | -63.766 | 54.179 | 1.00 | 0.00 |
| S    |      |     |     |     |        |         |        |      |      |
| ATOM | 7444 | CE  | MET | 344 | 28.910 | -64.357 | 52.869 | 1.00 | 0.00 |
| C    |      |     |     |     |        |         |        |      |      |
| ATOM | 7445 | C   | MET | 344 | 31.086 | -60.099 | 54.940 | 1.00 | 0.00 |
| C    |      |     |     |     |        |         |        |      |      |
| ATOM | 7446 | O   | MET | 344 | 31.701 | -59.826 | 55.986 | 1.00 | 0.00 |
| O    |      |     |     |     |        |         |        |      |      |
| ATOM | 7447 | N   | SER | 345 | 31.682 | -59.731 | 53.800 | 1.00 | 0.00 |
| N    |      |     |     |     |        |         |        |      |      |
| ATOM | 7448 | CA  | SER | 345 | 32.881 | -58.895 | 53.725 | 1.00 | 0.00 |
| C    |      |     |     |     |        |         |        |      |      |
| ATOM | 7449 | CB  | SER | 345 | 33.802 | -59.394 | 52.601 | 1.00 | 0.00 |
| C    |      |     |     |     |        |         |        |      |      |
| ATOM | 7450 | OG  | SER | 345 | 33.042 | -59.491 | 51.436 | 1.00 | 0.00 |
| O    |      |     |     |     |        |         |        |      |      |
| ATOM | 7451 | C   | SER | 345 | 32.488 | -57.470 | 53.499 | 1.00 | 0.00 |
| C    |      |     |     |     |        |         |        |      |      |
| ATOM | 7452 | O   | SER | 345 | 33.179 | -56.544 | 54.021 | 1.00 | 0.00 |
| O    |      |     |     |     |        |         |        |      |      |
| ATOM | 7453 | N   | ALA | 346 | 31.567 | -57.128 | 52.589 | 1.00 | 0.00 |
| N    |      |     |     |     |        |         |        |      |      |
| ATOM | 7454 | CA  | ALA | 346 | 31.233 | -55.831 | 52.284 | 1.00 | 0.00 |
| C    |      |     |     |     |        |         |        |      |      |
| ATOM | 7455 | CB  | ALA | 346 | 30.386 | -55.609 | 50.987 | 1.00 | 0.00 |
| C    |      |     |     |     |        |         |        |      |      |
| ATOM | 7456 | C   | ALA | 346 | 30.457 | -55.081 | 53.361 | 1.00 | 0.00 |
| C    |      |     |     |     |        |         |        |      |      |
| ATOM | 7457 | O   | ALA | 346 | 30.626 | -53.897 | 53.430 | 1.00 | 0.00 |
| O    |      |     |     |     |        |         |        |      |      |
| ATOM | 7458 | N   | VAL | 347 | 29.645 | -55.704 | 54.222 | 1.00 | 0.00 |
| N    |      |     |     |     |        |         |        |      |      |
| ATOM | 7459 | CA  | VAL | 347 | 28.744 | -55.093 | 55.263 | 1.00 | 0.00 |
| C    |      |     |     |     |        |         |        |      |      |
| ATOM | 7460 | CB  | VAL | 347 | 28.034 | -56.242 | 56.075 | 1.00 | 0.00 |
| C    |      |     |     |     |        |         |        |      |      |
| ATOM | 7461 | CG1 | VAL | 347 | 26.910 | -56.812 | 55.264 | 1.00 | 0.00 |
| C    |      |     |     |     |        |         |        |      |      |
| ATOM | 7462 | CG2 | VAL | 347 | 28.954 | -57.477 | 56.588 | 1.00 | 0.00 |
| C    |      |     |     |     |        |         |        |      |      |
| ATOM | 7463 | C   | VAL | 347 | 29.399 | -54.264 | 56.349 | 1.00 | 0.00 |
| C    |      |     |     |     |        |         |        |      |      |
| ATOM | 7464 | O   | VAL | 347 | 28.623 | -53.498 | 56.897 | 1.00 | 0.00 |
| O    |      |     |     |     |        |         |        |      |      |
| ATOM | 7465 | N   | GLN | 348 | 30.731 | -54.399 | 56.660 | 1.00 | 0.00 |
| N    |      |     |     |     |        |         |        |      |      |
| ATOM | 7466 | CA  | GLN | 348 | 31.529 | -53.728 | 57.748 | 1.00 | 0.00 |
| C    |      |     |     |     |        |         |        |      |      |
| ATOM | 7467 | CB  | GLN | 348 | 31.527 | -54.444 | 59.114 | 1.00 | 0.00 |
| C    |      |     |     |     |        |         |        |      |      |
| ATOM | 7468 | CG  | GLN | 348 | 30.155 | -54.439 | 59.881 | 1.00 | 0.00 |
| C    |      |     |     |     |        |         |        |      |      |
| ATOM | 7469 | CD  | GLN | 348 | 29.609 | -53.088 | 60.348 | 1.00 | 0.00 |
| C    |      |     |     |     |        |         |        |      |      |



|      |      |     |     |     |        |         |        |      |      |
|------|------|-----|-----|-----|--------|---------|--------|------|------|
| ATOM | 7470 | OE1 | GLN | 348 | 30.088 | -52.506 | 61.289 | 1.00 | 0.00 |
| O    |      |     |     |     |        |         |        |      |      |
| ATOM | 7471 | NE2 | GLN | 348 | 28.665 | -52.498 | 59.622 | 1.00 | 0.00 |
| N    |      |     |     |     |        |         |        |      |      |
| ATOM | 7472 | C   | GLN | 348 | 32.964 | -53.627 | 57.209 | 1.00 | 0.00 |
| C    |      |     |     |     |        |         |        |      |      |
| ATOM | 7473 | O   | GLN | 348 | 33.388 | -54.457 | 56.421 | 1.00 | 0.00 |
| O    |      |     |     |     |        |         |        |      |      |
| ATOM | 7474 | N   | LEU | 349 | 33.696 | -52.627 | 57.648 | 1.00 | 0.00 |
| N    |      |     |     |     |        |         |        |      |      |
| ATOM | 7475 | CA  | LEU | 349 | 35.185 | -52.394 | 57.292 | 1.00 | 0.00 |
| C    |      |     |     |     |        |         |        |      |      |
| ATOM | 7476 | CB  | LEU | 349 | 35.658 | -51.121 | 58.031 | 1.00 | 0.00 |
| C    |      |     |     |     |        |         |        |      |      |
| ATOM | 7477 | CG  | LEU | 349 | 35.262 | -49.876 | 57.225 | 1.00 | 0.00 |
| C    |      |     |     |     |        |         |        |      |      |
| ATOM | 7478 | CD1 | LEU | 349 | 35.148 | -48.671 | 58.067 | 1.00 | 0.00 |
| C    |      |     |     |     |        |         |        |      |      |
| ATOM | 7479 | CD2 | LEU | 349 | 36.216 | -49.572 | 56.114 | 1.00 | 0.00 |
| C    |      |     |     |     |        |         |        |      |      |
| ATOM | 7480 | C   | LEU | 349 | 35.989 | -53.633 | 57.853 | 1.00 | 0.00 |
| C    |      |     |     |     |        |         |        |      |      |
| ATOM | 7481 | O   | LEU | 349 | 35.895 | -54.006 | 59.009 | 1.00 | 0.00 |
| O    |      |     |     |     |        |         |        |      |      |
| ATOM | 7482 | N   | GLU | 350 | 36.862 | -54.163 | 57.021 | 1.00 | 0.00 |
| N    |      |     |     |     |        |         |        |      |      |
| ATOM | 7483 | CA  | GLU | 350 | 37.813 | -55.253 | 57.344 | 1.00 | 0.00 |
| C    |      |     |     |     |        |         |        |      |      |
| ATOM | 7484 | CB  | GLU | 350 | 38.644 | -55.607 | 56.064 | 1.00 | 0.00 |
| C    |      |     |     |     |        |         |        |      |      |
| ATOM | 7485 | CG  | GLU | 350 | 39.750 | -56.734 | 56.169 | 1.00 | 0.00 |
| C    |      |     |     |     |        |         |        |      |      |
| ATOM | 7486 | CD  | GLU | 350 | 39.220 | -58.131 | 56.288 | 1.00 | 0.00 |
| C    |      |     |     |     |        |         |        |      |      |
| ATOM | 7487 | OE1 | GLU | 350 | 40.035 | -59.080 | 56.525 | 1.00 | 0.00 |
| O    |      |     |     |     |        |         |        |      |      |
| ATOM | 7488 | OE2 | GLU | 350 | 38.030 | -58.498 | 56.029 | 1.00 | 0.00 |
| O1-  |      |     |     |     |        |         |        |      |      |
| ATOM | 7489 | C   | GLU | 350 | 38.705 | -55.091 | 58.604 | 1.00 | 0.00 |
| C    |      |     |     |     |        |         |        |      |      |
| ATOM | 7490 | O   | GLU | 350 | 38.870 | -56.020 | 59.348 | 1.00 | 0.00 |
| O    |      |     |     |     |        |         |        |      |      |
| ATOM | 7491 | N   | SER | 351 | 39.054 | -53.878 | 58.827 | 1.00 | 0.00 |
| N    |      |     |     |     |        |         |        |      |      |
| ATOM | 7492 | CA  | SER | 351 | 39.808 | -53.384 | 60.005 | 1.00 | 0.00 |
| C    |      |     |     |     |        |         |        |      |      |
| ATOM | 7493 | CB  | SER | 351 | 40.300 | -52.026 | 59.613 | 1.00 | 0.00 |
| C    |      |     |     |     |        |         |        |      |      |
| ATOM | 7494 | OG  | SER | 351 | 39.312 | -51.096 | 59.201 | 1.00 | 0.00 |
| O    |      |     |     |     |        |         |        |      |      |
| ATOM | 7495 | C   | SER | 351 | 38.965 | -53.278 | 61.258 | 1.00 | 0.00 |
| C    |      |     |     |     |        |         |        |      |      |
| ATOM | 7496 | O   | SER | 351 | 39.517 | -52.941 | 62.299 | 1.00 | 0.00 |
| O    |      |     |     |     |        |         |        |      |      |

|      |      |     |     |     |        |         |        |      |      |
|------|------|-----|-----|-----|--------|---------|--------|------|------|
| ATOM | 7497 | N   | LEU | 352 | 37.692 | -53.717 | 61.330 | 1.00 | 0.00 |
| N    |      |     |     |     |        |         |        |      |      |
| ATOM | 7498 | CA  | LEU | 352 | 37.048 | -53.866 | 62.626 | 1.00 | 0.00 |
| C    |      |     |     |     |        |         |        |      |      |
| ATOM | 7499 | CB  | LEU | 352 | 35.559 | -53.363 | 62.476 | 1.00 | 0.00 |
| C    |      |     |     |     |        |         |        |      |      |
| ATOM | 7500 | CG  | LEU | 352 | 35.297 | -51.879 | 62.109 | 1.00 | 0.00 |
| C    |      |     |     |     |        |         |        |      |      |
| ATOM | 7501 | CD1 | LEU | 352 | 33.767 | -51.726 | 62.168 | 1.00 | 0.00 |
| C    |      |     |     |     |        |         |        |      |      |
| ATOM | 7502 | CD2 | LEU | 352 | 36.017 | -51.007 | 63.074 | 1.00 | 0.00 |
| C    |      |     |     |     |        |         |        |      |      |
| ATOM | 7503 | C   | LEU | 352 | 37.033 | -55.289 | 63.171 | 1.00 | 0.00 |
| C    |      |     |     |     |        |         |        |      |      |
| ATOM | 7504 | O   | LEU | 352 | 36.487 | -55.502 | 64.275 | 1.00 | 0.00 |
| O    |      |     |     |     |        |         |        |      |      |
| ATOM | 7505 | N   | ASN | 353 | 37.535 | -56.284 | 62.408 | 1.00 | 0.00 |
| N    |      |     |     |     |        |         |        |      |      |
| ATOM | 7506 | CA  | ASN | 353 | 37.406 | -57.683 | 62.714 | 1.00 | 0.00 |
| C    |      |     |     |     |        |         |        |      |      |
| ATOM | 7507 | CB  | ASN | 353 | 37.589 | -58.447 | 61.370 | 1.00 | 0.00 |
| C    |      |     |     |     |        |         |        |      |      |
| ATOM | 7508 | CG  | ASN | 353 | 37.463 | -59.982 | 61.498 | 1.00 | 0.00 |
| C    |      |     |     |     |        |         |        |      |      |
| ATOM | 7509 | OD1 | ASN | 353 | 37.835 | -60.679 | 62.438 | 1.00 | 0.00 |
| O    |      |     |     |     |        |         |        |      |      |
| ATOM | 7510 | ND2 | ASN | 353 | 36.982 | -60.631 | 60.443 | 1.00 | 0.00 |
| N    |      |     |     |     |        |         |        |      |      |
| ATOM | 7511 | C   | ASN | 353 | 38.547 | -58.026 | 63.690 | 1.00 | 0.00 |
| C    |      |     |     |     |        |         |        |      |      |
| ATOM | 7512 | O   | ASN | 353 | 39.705 | -57.723 | 63.394 | 1.00 | 0.00 |
| O    |      |     |     |     |        |         |        |      |      |
| ATOM | 7513 | N   | LYS | 354 | 38.272 | -58.688 | 64.790 | 1.00 | 0.00 |
| N    |      |     |     |     |        |         |        |      |      |
| ATOM | 7514 | CA  | LYS | 354 | 39.295 | -58.983 | 65.857 | 1.00 | 0.00 |
| C    |      |     |     |     |        |         |        |      |      |
| ATOM | 7515 | CB  | LYS | 354 | 38.821 | -58.454 | 67.248 | 1.00 | 0.00 |
| C    |      |     |     |     |        |         |        |      |      |
| ATOM | 7516 | CG  | LYS | 354 | 38.477 | -56.914 | 67.263 | 1.00 | 0.00 |
| C    |      |     |     |     |        |         |        |      |      |
| ATOM | 7517 | CD  | LYS | 354 | 39.727 | -56.046 | 67.216 | 1.00 | 0.00 |
| C    |      |     |     |     |        |         |        |      |      |
| ATOM | 7518 | CE  | LYS | 354 | 39.449 | -54.565 | 67.409 | 1.00 | 0.00 |
| C    |      |     |     |     |        |         |        |      |      |
| ATOM | 7519 | NZ  | LYS | 354 | 40.563 | -53.869 | 68.103 | 1.00 | 0.00 |
| N1+  |      |     |     |     |        |         |        |      |      |
| ATOM | 7520 | C   | LYS | 354 | 39.882 | -60.390 | 65.912 | 1.00 | 0.00 |
| C    |      |     |     |     |        |         |        |      |      |
| ATOM | 7521 | O   | LYS | 354 | 40.839 | -60.525 | 66.686 | 1.00 | 0.00 |
| O    |      |     |     |     |        |         |        |      |      |
| ATOM | 7522 | N   | CYS | 355 | 39.367 | -61.361 | 65.230 | 1.00 | 0.00 |
| N    |      |     |     |     |        |         |        |      |      |
| ATOM | 7523 | CA  | CYS | 355 | 39.820 | -62.751 | 65.092 | 1.00 | 0.00 |
| C    |      |     |     |     |        |         |        |      |      |

|      |      |     |     |     |        |         |        |      |      |
|------|------|-----|-----|-----|--------|---------|--------|------|------|
| ATOM | 7524 | CB  | CYS | 355 | 38.656 | -63.546 | 64.555 | 1.00 | 0.00 |
| C    |      |     |     |     |        |         |        |      |      |
| ATOM | 7525 | SG  | CYS | 355 | 37.122 | -63.395 | 65.484 | 1.00 | 0.00 |
| S    |      |     |     |     |        |         |        |      |      |
| ATOM | 7526 | C   | CYS | 355 | 41.009 | -63.009 | 64.155 | 1.00 | 0.00 |
| C    |      |     |     |     |        |         |        |      |      |
| ATOM | 7527 | O   | CYS | 355 | 41.120 | -62.267 | 63.152 | 1.00 | 0.00 |
| O    |      |     |     |     |        |         |        |      |      |
| ATOM | 7528 | N   | GLN | 356 | 41.894 | -63.982 | 64.436 | 1.00 | 0.00 |
| N    |      |     |     |     |        |         |        |      |      |
| ATOM | 7529 | CA  | GLN | 356 | 42.977 | -64.342 | 63.479 | 1.00 | 0.00 |
| C    |      |     |     |     |        |         |        |      |      |
| ATOM | 7530 | CB  | GLN | 356 | 44.059 | -65.112 | 64.237 | 1.00 | 0.00 |
| C    |      |     |     |     |        |         |        |      |      |
| ATOM | 7531 | CG  | GLN | 356 | 45.229 | -65.727 | 63.432 | 1.00 | 0.00 |
| C    |      |     |     |     |        |         |        |      |      |
| ATOM | 7532 | CD  | GLN | 356 | 46.036 | -64.683 | 62.696 | 1.00 | 0.00 |
| C    |      |     |     |     |        |         |        |      |      |
| ATOM | 7533 | OE1 | GLN | 356 | 46.169 | -63.625 | 63.236 | 1.00 | 0.00 |
| O    |      |     |     |     |        |         |        |      |      |
| ATOM | 7534 | NE2 | GLN | 356 | 46.558 | -65.052 | 61.525 | 1.00 | 0.00 |
| N    |      |     |     |     |        |         |        |      |      |
| ATOM | 7535 | C   | GLN | 356 | 42.600 | -65.069 | 62.139 | 1.00 | 0.00 |
| C    |      |     |     |     |        |         |        |      |      |
| ATOM | 7536 | O   | GLN | 356 | 41.709 | -66.002 | 62.149 | 1.00 | 0.00 |
| O    |      |     |     |     |        |         |        |      |      |
| ATOM | 7537 | N   | ILE | 357 | 43.164 | -64.675 | 60.977 | 1.00 | 0.00 |
| N    |      |     |     |     |        |         |        |      |      |
| ATOM | 7538 | CA  | ILE | 357 | 42.974 | -65.344 | 59.640 | 1.00 | 0.00 |
| C    |      |     |     |     |        |         |        |      |      |
| ATOM | 7539 | CB  | ILE | 357 | 43.625 | -64.473 | 58.550 | 1.00 | 0.00 |
| C    |      |     |     |     |        |         |        |      |      |
| ATOM | 7540 | CG2 | ILE | 357 | 43.728 | -65.346 | 57.256 | 1.00 | 0.00 |
| C    |      |     |     |     |        |         |        |      |      |
| ATOM | 7541 | CG1 | ILE | 357 | 42.807 | -63.175 | 58.350 | 1.00 | 0.00 |
| C    |      |     |     |     |        |         |        |      |      |
| ATOM | 7542 | CD1 | ILE | 357 | 43.407 | -62.122 | 57.441 | 1.00 | 0.00 |
| C    |      |     |     |     |        |         |        |      |      |
| ATOM | 7543 | C   | ILE | 357 | 43.581 | -66.727 | 59.694 | 1.00 | 0.00 |
| C    |      |     |     |     |        |         |        |      |      |
| ATOM | 7544 | O   | ILE | 357 | 44.763 | -66.984 | 60.049 | 1.00 | 0.00 |
| O    |      |     |     |     |        |         |        |      |      |
| ATOM | 7545 | N   | PHE | 358 | 42.842 | -67.790 | 59.245 | 1.00 | 0.00 |
| N    |      |     |     |     |        |         |        |      |      |
| ATOM | 7546 | CA  | PHE | 358 | 43.273 | -69.186 | 59.140 | 1.00 | 0.00 |
| C    |      |     |     |     |        |         |        |      |      |
| ATOM | 7547 | CB  | PHE | 358 | 42.651 | -69.890 | 60.366 | 1.00 | 0.00 |
| C    |      |     |     |     |        |         |        |      |      |
| ATOM | 7548 | CG  | PHE | 358 | 43.514 | -69.707 | 61.626 | 1.00 | 0.00 |
| C    |      |     |     |     |        |         |        |      |      |
| ATOM | 7549 | CD1 | PHE | 358 | 44.539 | -70.582 | 61.852 | 1.00 | 0.00 |
| C    |      |     |     |     |        |         |        |      |      |
| ATOM | 7550 | CE1 | PHE | 358 | 45.404 | -70.462 | 62.949 | 1.00 | 0.00 |
| C    |      |     |     |     |        |         |        |      |      |

|      |      |     |     |     |        |         |        |      |      |
|------|------|-----|-----|-----|--------|---------|--------|------|------|
| ATOM | 7551 | CZ  | PHE | 358 | 45.054 | -69.533 | 63.973 | 1.00 | 0.00 |
| C    |      |     |     |     |        |         |        |      |      |
| ATOM | 7552 | CE2 | PHE | 358 | 43.935 | -68.770 | 63.820 | 1.00 | 0.00 |
| C    |      |     |     |     |        |         |        |      |      |
| ATOM | 7553 | CD2 | PHE | 358 | 43.201 | -68.827 | 62.634 | 1.00 | 0.00 |
| C    |      |     |     |     |        |         |        |      |      |
| ATOM | 7554 | C   | PHE | 358 | 42.787 | -69.687 | 57.768 | 1.00 | 0.00 |
| C    |      |     |     |     |        |         |        |      |      |
| ATOM | 7555 | O   | PHE | 358 | 41.877 | -69.106 | 57.188 | 1.00 | 0.00 |
| O    |      |     |     |     |        |         |        |      |      |
| ATOM | 7556 | N   | PRO | 359 | 43.269 | -70.846 | 57.276 | 1.00 | 0.00 |
| N    |      |     |     |     |        |         |        |      |      |
| ATOM | 7557 | CD  | PRO | 359 | 44.522 | -71.471 | 57.689 | 1.00 | 0.00 |
| C    |      |     |     |     |        |         |        |      |      |
| ATOM | 7558 | CG  | PRO | 359 | 44.501 | -72.856 | 56.912 | 1.00 | 0.00 |
| C    |      |     |     |     |        |         |        |      |      |
| ATOM | 7559 | CB  | PRO | 359 | 43.894 | -72.470 | 55.599 | 1.00 | 0.00 |
| C    |      |     |     |     |        |         |        |      |      |
| ATOM | 7560 | CA  | PRO | 359 | 42.751 | -71.570 | 56.068 | 1.00 | 0.00 |
| C    |      |     |     |     |        |         |        |      |      |
| ATOM | 7561 | C   | PRO | 359 | 41.379 | -72.189 | 56.351 | 1.00 | 0.00 |
| C    |      |     |     |     |        |         |        |      |      |
| ATOM | 7562 | O   | PRO | 359 | 41.120 | -72.668 | 57.491 | 1.00 | 0.00 |
| O    |      |     |     |     |        |         |        |      |      |
| ATOM | 7563 | N   | SER | 360 | 40.606 | -72.408 | 55.284 | 1.00 | 0.00 |
| N    |      |     |     |     |        |         |        |      |      |
| ATOM | 7564 | CA  | SER | 360 | 39.517 | -73.380 | 55.153 | 1.00 | 0.00 |
| C    |      |     |     |     |        |         |        |      |      |
| ATOM | 7565 | CB  | SER | 360 | 38.449 | -72.714 | 54.351 | 1.00 | 0.00 |
| C    |      |     |     |     |        |         |        |      |      |
| ATOM | 7566 | OG  | SER | 360 | 37.376 | -73.534 | 53.994 | 1.00 | 0.00 |
| O    |      |     |     |     |        |         |        |      |      |
| ATOM | 7567 | C   | SER | 360 | 39.885 | -74.712 | 54.496 | 1.00 | 0.00 |
| C    |      |     |     |     |        |         |        |      |      |
| ATOM | 7568 | O   | SER | 360 | 40.746 | -74.859 | 53.645 | 1.00 | 0.00 |
| O    |      |     |     |     |        |         |        |      |      |
| ATOM | 7569 | N   | LYS | 361 | 39.171 | -75.800 | 54.914 | 1.00 | 0.00 |
| N    |      |     |     |     |        |         |        |      |      |
| ATOM | 7570 | CA  | LYS | 361 | 39.406 | -77.184 | 54.475 | 1.00 | 0.00 |
| C    |      |     |     |     |        |         |        |      |      |
| ATOM | 7571 | CB  | LYS | 361 | 38.517 | -78.149 | 55.173 | 1.00 | 0.00 |
| C    |      |     |     |     |        |         |        |      |      |
| ATOM | 7572 | CG  | LYS | 361 | 36.966 | -77.918 | 54.861 | 1.00 | 0.00 |
| C    |      |     |     |     |        |         |        |      |      |
| ATOM | 7573 | CD  | LYS | 361 | 36.035 | -78.313 | 56.028 | 1.00 | 0.00 |
| C    |      |     |     |     |        |         |        |      |      |
| ATOM | 7574 | CE  | LYS | 361 | 34.607 | -77.936 | 55.632 | 1.00 | 0.00 |
| C    |      |     |     |     |        |         |        |      |      |
| ATOM | 7575 | NZ  | LYS | 361 | 33.556 | -78.531 | 56.523 | 1.00 | 0.00 |
| N1+  |      |     |     |     |        |         |        |      |      |
| ATOM | 7576 | C   | LYS | 361 | 39.271 | -77.420 | 52.948 | 1.00 | 0.00 |
| C    |      |     |     |     |        |         |        |      |      |
| ATOM | 7577 | O   | LYS | 361 | 38.321 | -76.926 | 52.373 | 1.00 | 0.00 |
| O    |      |     |     |     |        |         |        |      |      |

|      |      |     |     |     |        |         |        |      |      |
|------|------|-----|-----|-----|--------|---------|--------|------|------|
| ATOM | 7578 | N   | PRO | 362 | 40.192 | -78.134 | 52.269 | 1.00 | 0.00 |
| N    |      |     |     |     |        |         |        |      |      |
| ATOM | 7579 | CD  | PRO | 362 | 41.319 | -78.643 | 52.948 | 1.00 | 0.00 |
| C    |      |     |     |     |        |         |        |      |      |
| ATOM | 7580 | CG  | PRO | 362 | 42.266 | -79.189 | 51.874 | 1.00 | 0.00 |
| C    |      |     |     |     |        |         |        |      |      |
| ATOM | 7581 | CB  | PRO | 362 | 41.293 | -79.540 | 50.718 | 1.00 | 0.00 |
| C    |      |     |     |     |        |         |        |      |      |
| ATOM | 7582 | CA  | PRO | 362 | 40.118 | -78.546 | 50.857 | 1.00 | 0.00 |
| C    |      |     |     |     |        |         |        |      |      |
| ATOM | 7583 | C   | PRO | 362 | 38.745 | -79.217 | 50.515 | 1.00 | 0.00 |
| C    |      |     |     |     |        |         |        |      |      |
| ATOM | 7584 | O   | PRO | 362 | 38.077 | -79.620 | 51.476 | 1.00 | 0.00 |
| O    |      |     |     |     |        |         |        |      |      |
| ATOM | 7585 | N   | VAL | 363 | 38.374 | -79.246 | 49.206 | 1.00 | 0.00 |
| N    |      |     |     |     |        |         |        |      |      |
| ATOM | 7586 | CA  | VAL | 363 | 37.044 | -79.772 | 48.735 | 1.00 | 0.00 |
| C    |      |     |     |     |        |         |        |      |      |
| ATOM | 7587 | CB  | VAL | 363 | 36.530 | -79.233 | 47.365 | 1.00 | 0.00 |
| C    |      |     |     |     |        |         |        |      |      |
| ATOM | 7588 | CG1 | VAL | 363 | 36.515 | -77.691 | 47.389 | 1.00 | 0.00 |
| C    |      |     |     |     |        |         |        |      |      |
| ATOM | 7589 | CG2 | VAL | 363 | 37.375 | -79.709 | 46.214 | 1.00 | 0.00 |
| C    |      |     |     |     |        |         |        |      |      |
| ATOM | 7590 | C   | VAL | 363 | 36.947 | -81.298 | 48.794 | 1.00 | 0.00 |
| C    |      |     |     |     |        |         |        |      |      |
| ATOM | 7591 | O   | VAL | 363 | 35.812 | -81.805 | 48.725 | 1.00 | 0.00 |
| O    |      |     |     |     |        |         |        |      |      |
| ATOM | 7592 | N   | SER | 364 | 38.077 | -82.019 | 48.847 | 1.00 | 0.00 |
| N    |      |     |     |     |        |         |        |      |      |
| ATOM | 7593 | CA  | SER | 364 | 38.220 | -83.469 | 48.937 | 1.00 | 0.00 |
| C    |      |     |     |     |        |         |        |      |      |
| ATOM | 7594 | CB  | SER | 364 | 39.726 | -83.793 | 49.005 | 1.00 | 0.00 |
| C    |      |     |     |     |        |         |        |      |      |
| ATOM | 7595 | OG  | SER | 364 | 39.966 | -85.206 | 48.923 | 1.00 | 0.00 |
| O    |      |     |     |     |        |         |        |      |      |
| ATOM | 7596 | C   | SER | 364 | 37.623 | -84.020 | 50.174 | 1.00 | 0.00 |
| C    |      |     |     |     |        |         |        |      |      |
| ATOM | 7597 | O   | SER | 364 | 37.735 | -83.429 | 51.274 | 1.00 | 0.00 |
| O    |      |     |     |     |        |         |        |      |      |
| ATOM | 7598 | N   | ARG | 365 | 36.978 | -85.196 | 50.071 | 1.00 | 0.00 |
| N    |      |     |     |     |        |         |        |      |      |
| ATOM | 7599 | CA  | ARG | 365 | 36.364 | -85.943 | 51.185 | 1.00 | 0.00 |
| C    |      |     |     |     |        |         |        |      |      |
| ATOM | 7600 | CB  | ARG | 365 | 35.741 | -87.256 | 50.688 | 1.00 | 0.00 |
| C    |      |     |     |     |        |         |        |      |      |
| ATOM | 7601 | CG  | ARG | 365 | 36.565 | -88.157 | 49.786 | 1.00 | 0.00 |
| C    |      |     |     |     |        |         |        |      |      |
| ATOM | 7602 | CD  | ARG | 365 | 35.673 | -89.194 | 49.055 | 1.00 | 0.00 |
| C    |      |     |     |     |        |         |        |      |      |
| ATOM | 7603 | NE  | ARG | 365 | 35.253 | -90.332 | 49.875 | 1.00 | 0.00 |
| N    |      |     |     |     |        |         |        |      |      |
| ATOM | 7604 | CZ  | ARG | 365 | 34.064 | -90.697 | 50.222 | 1.00 | 0.00 |
| C    |      |     |     |     |        |         |        |      |      |

|      |      |     |     |     |        |         |        |      |      |
|------|------|-----|-----|-----|--------|---------|--------|------|------|
| ATOM | 7605 | NH1 | ARG | 365 | 33.976 | -91.643 | 51.101 | 1.00 | 0.00 |
| N    |      |     |     |     |        |         |        |      |      |
| ATOM | 7606 | NH2 | ARG | 365 | 33.020 | -90.149 | 49.760 | 1.00 | 0.00 |
| N1+  |      |     |     |     |        |         |        |      |      |
| ATOM | 7607 | C   | ARG | 365 | 37.415 | -86.315 | 52.178 | 1.00 | 0.00 |
| C    |      |     |     |     |        |         |        |      |      |
| ATOM | 7608 | O   | ARG | 365 | 37.048 | -86.571 | 53.303 | 1.00 | 0.00 |
| O    |      |     |     |     |        |         |        |      |      |
| ATOM | 7609 | N   | GLU | 366 | 38.682 | -86.300 | 51.817 | 1.00 | 0.00 |
| N    |      |     |     |     |        |         |        |      |      |
| ATOM | 7610 | CA  | GLU | 366 | 39.721 | -86.866 | 52.678 | 1.00 | 0.00 |
| C    |      |     |     |     |        |         |        |      |      |
| ATOM | 7611 | CB  | GLU | 366 | 40.933 | -87.362 | 51.874 | 1.00 | 0.00 |
| C    |      |     |     |     |        |         |        |      |      |
| ATOM | 7612 | CG  | GLU | 366 | 42.208 | -88.063 | 52.513 | 1.00 | 0.00 |
| C    |      |     |     |     |        |         |        |      |      |
| ATOM | 7613 | CD  | GLU | 366 | 41.938 | -88.955 | 53.746 | 1.00 | 0.00 |
| C    |      |     |     |     |        |         |        |      |      |
| ATOM | 7614 | OE1 | GLU | 366 | 40.870 | -89.615 | 53.836 | 1.00 | 0.00 |
| O    |      |     |     |     |        |         |        |      |      |
| ATOM | 7615 | OE2 | GLU | 366 | 42.788 | -89.130 | 54.682 | 1.00 | 0.00 |
| O1-  |      |     |     |     |        |         |        |      |      |
| ATOM | 7616 | C   | GLU | 366 | 40.183 | -85.769 | 53.696 | 1.00 | 0.00 |
| C    |      |     |     |     |        |         |        |      |      |
| ATOM | 7617 | O   | GLU | 366 | 40.783 | -86.102 | 54.730 | 1.00 | 0.00 |
| O    |      |     |     |     |        |         |        |      |      |
| ATOM | 7618 | N   | ASP | 367 | 39.854 | -84.446 | 53.470 | 1.00 | 0.00 |
| N    |      |     |     |     |        |         |        |      |      |
| ATOM | 7619 | CA  | ASP | 367 | 40.151 | -83.397 | 54.385 | 1.00 | 0.00 |
| C    |      |     |     |     |        |         |        |      |      |
| ATOM | 7620 | CB  | ASP | 367 | 41.011 | -82.321 | 53.687 | 1.00 | 0.00 |
| C    |      |     |     |     |        |         |        |      |      |
| ATOM | 7621 | CG  | ASP | 367 | 42.190 | -82.905 | 52.832 | 1.00 | 0.00 |
| C    |      |     |     |     |        |         |        |      |      |
| ATOM | 7622 | OD1 | ASP | 367 | 42.029 | -83.016 | 51.605 | 1.00 | 0.00 |
| O    |      |     |     |     |        |         |        |      |      |
| ATOM | 7623 | OD2 | ASP | 367 | 43.307 | -82.960 | 53.372 | 1.00 | 0.00 |
| O1-  |      |     |     |     |        |         |        |      |      |
| ATOM | 7624 | C   | ASP | 367 | 38.851 | -82.817 | 55.062 | 1.00 | 0.00 |
| C    |      |     |     |     |        |         |        |      |      |
| ATOM | 7625 | O   | ASP | 367 | 39.007 | -81.759 | 55.673 | 1.00 | 0.00 |
| O    |      |     |     |     |        |         |        |      |      |
| ATOM | 7626 | N   | GLN | 368 | 37.664 | -83.349 | 54.794 | 1.00 | 0.00 |
| N    |      |     |     |     |        |         |        |      |      |
| ATOM | 7627 | CA  | GLN | 368 | 36.412 | -82.756 | 55.279 | 1.00 | 0.00 |
| C    |      |     |     |     |        |         |        |      |      |
| ATOM | 7628 | CB  | GLN | 368 | 35.335 | -83.568 | 54.676 | 1.00 | 0.00 |
| C    |      |     |     |     |        |         |        |      |      |
| ATOM | 7629 | CG  | GLN | 368 | 33.809 | -83.318 | 54.865 | 1.00 | 0.00 |
| C    |      |     |     |     |        |         |        |      |      |
| ATOM | 7630 | CD  | GLN | 368 | 33.390 | -81.854 | 54.884 | 1.00 | 0.00 |
| C    |      |     |     |     |        |         |        |      |      |
| ATOM | 7631 | OE1 | GLN | 368 | 32.876 | -81.342 | 55.835 | 1.00 | 0.00 |
| O    |      |     |     |     |        |         |        |      |      |

|      |      |     |     |     |        |         |        |      |      |
|------|------|-----|-----|-----|--------|---------|--------|------|------|
| ATOM | 7632 | NE2 | GLN | 368 | 33.774 | -81.082 | 53.979 | 1.00 | 0.00 |
| N    |      |     |     |     |        |         |        |      |      |
| ATOM | 7633 | C   | GLN | 368 | 36.246 | -82.779 | 56.811 | 1.00 | 0.00 |
| C    |      |     |     |     |        |         |        |      |      |
| ATOM | 7634 | O   | GLN | 368 | 35.692 | -81.842 | 57.338 | 1.00 | 0.00 |
| O    |      |     |     |     |        |         |        |      |      |
| ATOM | 7635 | N   | CYS | 369 | 36.658 | -83.864 | 57.479 | 1.00 | 0.00 |
| N    |      |     |     |     |        |         |        |      |      |
| ATOM | 7636 | CA  | CYS | 369 | 36.873 | -83.933 | 58.982 | 1.00 | 0.00 |
| C    |      |     |     |     |        |         |        |      |      |
| ATOM | 7637 | CB  | CYS | 369 | 37.246 | -85.286 | 59.442 | 1.00 | 0.00 |
| C    |      |     |     |     |        |         |        |      |      |
| ATOM | 7638 | SG  | CYS | 369 | 36.205 | -86.510 | 58.533 | 1.00 | 0.00 |
| S    |      |     |     |     |        |         |        |      |      |
| ATOM | 7639 | C   | CYS | 369 | 37.924 | -82.918 | 59.495 | 1.00 | 0.00 |
| C    |      |     |     |     |        |         |        |      |      |
| ATOM | 7640 | O   | CYS | 369 | 38.136 | -82.846 | 60.705 | 1.00 | 0.00 |
| O    |      |     |     |     |        |         |        |      |      |
| ATOM | 7641 | N   | SER | 370 | 38.587 | -82.065 | 58.644 | 1.00 | 0.00 |
| N    |      |     |     |     |        |         |        |      |      |
| ATOM | 7642 | CA  | SER | 370 | 39.461 | -80.959 | 59.173 | 1.00 | 0.00 |
| C    |      |     |     |     |        |         |        |      |      |
| ATOM | 7643 | CB  | SER | 370 | 40.306 | -80.587 | 57.955 | 1.00 | 0.00 |
| C    |      |     |     |     |        |         |        |      |      |
| ATOM | 7644 | OG  | SER | 370 | 41.411 | -79.746 | 58.392 | 1.00 | 0.00 |
| O    |      |     |     |     |        |         |        |      |      |
| ATOM | 7645 | C   | SER | 370 | 38.740 | -79.799 | 59.788 | 1.00 | 0.00 |
| C    |      |     |     |     |        |         |        |      |      |
| ATOM | 7646 | O   | SER | 370 | 38.152 | -78.936 | 59.091 | 1.00 | 0.00 |
| O    |      |     |     |     |        |         |        |      |      |
| ATOM | 7647 | N   | TYR | 371 | 38.623 | -79.831 | 61.144 | 1.00 | 0.00 |
| N    |      |     |     |     |        |         |        |      |      |
| ATOM | 7648 | CA  | TYR | 371 | 37.913 | -78.785 | 61.914 | 1.00 | 0.00 |
| C    |      |     |     |     |        |         |        |      |      |
| ATOM | 7649 | CB  | TYR | 371 | 37.175 | -79.400 | 63.070 | 1.00 | 0.00 |
| C    |      |     |     |     |        |         |        |      |      |
| ATOM | 7650 | CG  | TYR | 371 | 36.416 | -78.477 | 63.987 | 1.00 | 0.00 |
| C    |      |     |     |     |        |         |        |      |      |
| ATOM | 7651 | CD1 | TYR | 371 | 35.088 | -78.287 | 63.723 | 1.00 | 0.00 |
| C    |      |     |     |     |        |         |        |      |      |
| ATOM | 7652 | CE1 | TYR | 371 | 34.407 | -77.467 | 64.632 | 1.00 | 0.00 |
| C    |      |     |     |     |        |         |        |      |      |
| ATOM | 7653 | CZ  | TYR | 371 | 34.993 | -76.854 | 65.781 | 1.00 | 0.00 |
| C    |      |     |     |     |        |         |        |      |      |
| ATOM | 7654 | OH  | TYR | 371 | 34.193 | -76.128 | 66.626 | 1.00 | 0.00 |
| O    |      |     |     |     |        |         |        |      |      |
| ATOM | 7655 | CE2 | TYR | 371 | 36.352 | -77.170 | 66.000 | 1.00 | 0.00 |
| C    |      |     |     |     |        |         |        |      |      |
| ATOM | 7656 | CD2 | TYR | 371 | 37.071 | -78.008 | 65.126 | 1.00 | 0.00 |
| C    |      |     |     |     |        |         |        |      |      |
| ATOM | 7657 | C   | TYR | 371 | 38.804 | -77.721 | 62.531 | 1.00 | 0.00 |
| C    |      |     |     |     |        |         |        |      |      |
| ATOM | 7658 | O   | TYR | 371 | 38.407 | -76.528 | 62.731 | 1.00 | 0.00 |
| O    |      |     |     |     |        |         |        |      |      |

|      |      |     |     |     |        |         |        |      |      |
|------|------|-----|-----|-----|--------|---------|--------|------|------|
| ATOM | 7659 | N   | LYS | 372 | 40.063 | -78.055 | 62.803 | 1.00 | 0.00 |
| N    |      |     |     |     |        |         |        |      |      |
| ATOM | 7660 | CA  | LYS | 372 | 41.015 | -77.356 | 63.673 | 1.00 | 0.00 |
| C    |      |     |     |     |        |         |        |      |      |
| ATOM | 7661 | CB  | LYS | 372 | 42.344 | -78.116 | 63.826 | 1.00 | 0.00 |
| C    |      |     |     |     |        |         |        |      |      |
| ATOM | 7662 | CG  | LYS | 372 | 43.079 | -78.479 | 62.534 | 1.00 | 0.00 |
| C    |      |     |     |     |        |         |        |      |      |
| ATOM | 7663 | CD  | LYS | 372 | 44.493 | -78.964 | 62.807 | 1.00 | 0.00 |
| C    |      |     |     |     |        |         |        |      |      |
| ATOM | 7664 | CE  | LYS | 372 | 44.487 | -80.216 | 63.776 | 1.00 | 0.00 |
| C    |      |     |     |     |        |         |        |      |      |
| ATOM | 7665 | NZ  | LYS | 372 | 45.907 | -80.614 | 64.137 | 1.00 | 0.00 |
| N1+  |      |     |     |     |        |         |        |      |      |
| ATOM | 7666 | C   | LYS | 372 | 41.236 | -75.899 | 63.287 | 1.00 | 0.00 |
| C    |      |     |     |     |        |         |        |      |      |
| ATOM | 7667 | O   | LYS | 372 | 41.166 | -74.997 | 64.105 | 1.00 | 0.00 |
| O    |      |     |     |     |        |         |        |      |      |
| ATOM | 7668 | N   | TRP | 373 | 41.279 | -75.600 | 62.020 | 1.00 | 0.00 |
| N    |      |     |     |     |        |         |        |      |      |
| ATOM | 7669 | CA  | TRP | 373 | 41.488 | -74.325 | 61.425 | 1.00 | 0.00 |
| C    |      |     |     |     |        |         |        |      |      |
| ATOM | 7670 | CB  | TRP | 373 | 42.639 | -74.300 | 60.500 | 1.00 | 0.00 |
| C    |      |     |     |     |        |         |        |      |      |
| ATOM | 7671 | CG  | TRP | 373 | 43.969 | -74.544 | 61.187 | 1.00 | 0.00 |
| C    |      |     |     |     |        |         |        |      |      |
| ATOM | 7672 | CD1 | TRP | 373 | 44.455 | -73.790 | 62.186 | 1.00 | 0.00 |
| C    |      |     |     |     |        |         |        |      |      |
| ATOM | 7673 | NE1 | TRP | 373 | 45.677 | -74.336 | 62.582 | 1.00 | 0.00 |
| N    |      |     |     |     |        |         |        |      |      |
| ATOM | 7674 | CE2 | TRP | 373 | 46.004 | -75.490 | 61.894 | 1.00 | 0.00 |
| C    |      |     |     |     |        |         |        |      |      |
| ATOM | 7675 | CZ2 | TRP | 373 | 46.996 | -76.512 | 61.942 | 1.00 | 0.00 |
| C    |      |     |     |     |        |         |        |      |      |
| ATOM | 7676 | CH2 | TRP | 373 | 46.998 | -77.530 | 60.980 | 1.00 | 0.00 |
| C    |      |     |     |     |        |         |        |      |      |
| ATOM | 7677 | CZ3 | TRP | 373 | 46.114 | -77.593 | 59.945 | 1.00 | 0.00 |
| C    |      |     |     |     |        |         |        |      |      |
| ATOM | 7678 | CE3 | TRP | 373 | 45.094 | -76.620 | 59.946 | 1.00 | 0.00 |
| C    |      |     |     |     |        |         |        |      |      |
| ATOM | 7679 | CD2 | TRP | 373 | 45.007 | -75.537 | 60.872 | 1.00 | 0.00 |
| C    |      |     |     |     |        |         |        |      |      |
| ATOM | 7680 | C   | TRP | 373 | 40.171 | -73.863 | 60.705 | 1.00 | 0.00 |
| C    |      |     |     |     |        |         |        |      |      |
| ATOM | 7681 | O   | TRP | 373 | 39.814 | -72.703 | 60.603 | 1.00 | 0.00 |
| O    |      |     |     |     |        |         |        |      |      |
| ATOM | 7682 | N   | TRP | 374 | 39.341 | -74.834 | 60.159 | 1.00 | 0.00 |
| N    |      |     |     |     |        |         |        |      |      |
| ATOM | 7683 | CA  | TRP | 374 | 38.021 | -74.528 | 59.612 | 1.00 | 0.00 |
| C    |      |     |     |     |        |         |        |      |      |
| ATOM | 7684 | CB  | TRP | 374 | 37.402 | -75.881 | 59.323 | 1.00 | 0.00 |
| C    |      |     |     |     |        |         |        |      |      |
| ATOM | 7685 | CG  | TRP | 374 | 35.906 | -75.870 | 59.087 | 1.00 | 0.00 |
| C    |      |     |     |     |        |         |        |      |      |



|      |      |     |     |     |        |         |        |      |      |
|------|------|-----|-----|-----|--------|---------|--------|------|------|
| ATOM | 7686 | CD1 | TRP | 374 | 34.934 | -76.338 | 59.933 | 1.00 | 0.00 |
| C    |      |     |     |     |        |         |        |      |      |
| ATOM | 7687 | NE1 | TRP | 374 | 33.687 | -76.032 | 59.425 | 1.00 | 0.00 |
| N    |      |     |     |     |        |         |        |      |      |
| ATOM | 7688 | CE2 | TRP | 374 | 33.783 | -75.229 | 58.326 | 1.00 | 0.00 |
| C    |      |     |     |     |        |         |        |      |      |
| ATOM | 7689 | CZ2 | TRP | 374 | 32.773 | -74.772 | 57.527 | 1.00 | 0.00 |
| C    |      |     |     |     |        |         |        |      |      |
| ATOM | 7690 | CH2 | TRP | 374 | 33.140 | -74.234 | 56.314 | 1.00 | 0.00 |
| C    |      |     |     |     |        |         |        |      |      |
| ATOM | 7691 | CZ3 | TRP | 374 | 34.487 | -74.032 | 55.972 | 1.00 | 0.00 |
| C    |      |     |     |     |        |         |        |      |      |
| ATOM | 7692 | CE3 | TRP | 374 | 35.512 | -74.457 | 56.830 | 1.00 | 0.00 |
| C    |      |     |     |     |        |         |        |      |      |
| ATOM | 7693 | CD2 | TRP | 374 | 35.142 | -75.120 | 58.022 | 1.00 | 0.00 |
| C    |      |     |     |     |        |         |        |      |      |
| ATOM | 7694 | C   | TRP | 374 | 37.115 | -73.707 | 60.536 | 1.00 | 0.00 |
| C    |      |     |     |     |        |         |        |      |      |
| ATOM | 7695 | O   | TRP | 374 | 36.546 | -72.778 | 60.114 | 1.00 | 0.00 |
| O    |      |     |     |     |        |         |        |      |      |
| ATOM | 7696 | N   | GLN | 375 | 37.085 | -74.052 | 61.835 | 1.00 | 0.00 |
| N    |      |     |     |     |        |         |        |      |      |
| ATOM | 7697 | CA  | GLN | 375 | 36.413 | -73.336 | 62.937 | 1.00 | 0.00 |
| C    |      |     |     |     |        |         |        |      |      |
| ATOM | 7698 | CB  | GLN | 375 | 36.680 | -74.104 | 64.220 | 1.00 | 0.00 |
| C    |      |     |     |     |        |         |        |      |      |
| ATOM | 7699 | CG  | GLN | 375 | 36.175 | -73.428 | 65.519 | 1.00 | 0.00 |
| C    |      |     |     |     |        |         |        |      |      |
| ATOM | 7700 | CD  | GLN | 375 | 34.672 | -73.272 | 65.576 | 1.00 | 0.00 |
| C    |      |     |     |     |        |         |        |      |      |
| ATOM | 7701 | OE1 | GLN | 375 | 33.913 | -73.818 | 64.755 | 1.00 | 0.00 |
| O    |      |     |     |     |        |         |        |      |      |
| ATOM | 7702 | NE2 | GLN | 375 | 34.141 | -72.697 | 66.637 | 1.00 | 0.00 |
| N    |      |     |     |     |        |         |        |      |      |
| ATOM | 7703 | C   | GLN | 375 | 36.981 | -71.941 | 63.107 | 1.00 | 0.00 |
| C    |      |     |     |     |        |         |        |      |      |
| ATOM | 7704 | O   | GLN | 375 | 36.278 | -71.020 | 63.489 | 1.00 | 0.00 |
| O    |      |     |     |     |        |         |        |      |      |
| ATOM | 7705 | N   | LYS | 376 | 38.290 | -71.699 | 62.876 | 1.00 | 0.00 |
| N    |      |     |     |     |        |         |        |      |      |
| ATOM | 7706 | CA  | LYS | 376 | 39.017 | -70.477 | 63.192 | 1.00 | 0.00 |
| C    |      |     |     |     |        |         |        |      |      |
| ATOM | 7707 | CB  | LYS | 376 | 40.493 | -70.748 | 63.368 | 1.00 | 0.00 |
| C    |      |     |     |     |        |         |        |      |      |
| ATOM | 7708 | CG  | LYS | 376 | 40.754 | -71.598 | 64.572 | 1.00 | 0.00 |
| C    |      |     |     |     |        |         |        |      |      |
| ATOM | 7709 | CD  | LYS | 376 | 42.231 | -71.738 | 64.992 | 1.00 | 0.00 |
| C    |      |     |     |     |        |         |        |      |      |
| ATOM | 7710 | CE  | LYS | 376 | 42.253 | -72.208 | 66.348 | 1.00 | 0.00 |
| C    |      |     |     |     |        |         |        |      |      |
| ATOM | 7711 | NZ  | LYS | 376 | 42.112 | -73.633 | 66.324 | 1.00 | 0.00 |
| N1+  |      |     |     |     |        |         |        |      |      |
| ATOM | 7712 | C   | LYS | 376 | 38.761 | -69.600 | 61.959 | 1.00 | 0.00 |
| C    |      |     |     |     |        |         |        |      |      |

|      |      |     |     |     |        |         |        |      |      |
|------|------|-----|-----|-----|--------|---------|--------|------|------|
| ATOM | 7713 | O   | LYS | 376 | 38.398 | -68.413 | 62.150 | 1.00 | 0.00 |
| O    |      |     |     |     |        |         |        |      |      |
| ATOM | 7714 | N   | TYR | 377 | 38.834 | -70.083 | 60.719 | 1.00 | 0.00 |
| N    |      |     |     |     |        |         |        |      |      |
| ATOM | 7715 | CA  | TYR | 377 | 38.305 | -69.460 | 59.501 | 1.00 | 0.00 |
| C    |      |     |     |     |        |         |        |      |      |
| ATOM | 7716 | CB  | TYR | 377 | 38.646 | -70.477 | 58.316 | 1.00 | 0.00 |
| C    |      |     |     |     |        |         |        |      |      |
| ATOM | 7717 | CG  | TYR | 377 | 37.997 | -70.177 | 56.969 | 1.00 | 0.00 |
| C    |      |     |     |     |        |         |        |      |      |
| ATOM | 7718 | CD1 | TYR | 377 | 38.745 | -69.521 | 56.001 | 1.00 | 0.00 |
| C    |      |     |     |     |        |         |        |      |      |
| ATOM | 7719 | CE1 | TYR | 377 | 38.077 | -69.131 | 54.847 | 1.00 | 0.00 |
| C    |      |     |     |     |        |         |        |      |      |
| ATOM | 7720 | CZ  | TYR | 377 | 36.781 | -69.470 | 54.566 | 1.00 | 0.00 |
| C    |      |     |     |     |        |         |        |      |      |
| ATOM | 7721 | OH  | TYR | 377 | 36.332 | -69.093 | 53.302 | 1.00 | 0.00 |
| O    |      |     |     |     |        |         |        |      |      |
| ATOM | 7722 | CE2 | TYR | 377 | 36.010 | -70.128 | 55.526 | 1.00 | 0.00 |
| C    |      |     |     |     |        |         |        |      |      |
| ATOM | 7723 | CD2 | TYR | 377 | 36.606 | -70.495 | 56.781 | 1.00 | 0.00 |
| C    |      |     |     |     |        |         |        |      |      |
| ATOM | 7724 | C   | TYR | 377 | 36.825 | -69.063 | 59.599 | 1.00 | 0.00 |
| C    |      |     |     |     |        |         |        |      |      |
| ATOM | 7725 | O   | TYR | 377 | 36.470 | -67.906 | 59.325 | 1.00 | 0.00 |
| O    |      |     |     |     |        |         |        |      |      |
| ATOM | 7726 | N   | GLN | 378 | 36.006 | -69.911 | 60.298 | 1.00 | 0.00 |
| N    |      |     |     |     |        |         |        |      |      |
| ATOM | 7727 | CA  | GLN | 378 | 34.606 | -69.525 | 60.448 | 1.00 | 0.00 |
| C    |      |     |     |     |        |         |        |      |      |
| ATOM | 7728 | CB  | GLN | 378 | 33.792 | -70.798 | 60.644 | 1.00 | 0.00 |
| C    |      |     |     |     |        |         |        |      |      |
| ATOM | 7729 | CG  | GLN | 378 | 33.572 | -71.603 | 59.386 | 1.00 | 0.00 |
| C    |      |     |     |     |        |         |        |      |      |
| ATOM | 7730 | CD  | GLN | 378 | 32.605 | -70.962 | 58.456 | 1.00 | 0.00 |
| C    |      |     |     |     |        |         |        |      |      |
| ATOM | 7731 | OE1 | GLN | 378 | 32.907 | -70.015 | 57.661 | 1.00 | 0.00 |
| O    |      |     |     |     |        |         |        |      |      |
| ATOM | 7732 | NE2 | GLN | 378 | 31.424 | -71.502 | 58.474 | 1.00 | 0.00 |
| N    |      |     |     |     |        |         |        |      |      |
| ATOM | 7733 | C   | GLN | 378 | 34.294 | -68.570 | 61.556 | 1.00 | 0.00 |
| C    |      |     |     |     |        |         |        |      |      |
| ATOM | 7734 | O   | GLN | 378 | 33.477 | -67.707 | 61.381 | 1.00 | 0.00 |
| O    |      |     |     |     |        |         |        |      |      |
| ATOM | 7735 | N   | LYS | 379 | 34.998 | -68.601 | 62.644 | 1.00 | 0.00 |
| N    |      |     |     |     |        |         |        |      |      |
| ATOM | 7736 | CA  | LYS | 379 | 35.079 | -67.522 | 63.691 | 1.00 | 0.00 |
| C    |      |     |     |     |        |         |        |      |      |
| ATOM | 7737 | CB  | LYS | 379 | 36.046 | -67.920 | 64.866 | 1.00 | 0.00 |
| C    |      |     |     |     |        |         |        |      |      |
| ATOM | 7738 | CG  | LYS | 379 | 36.173 | -66.785 | 65.913 | 1.00 | 0.00 |
| C    |      |     |     |     |        |         |        |      |      |
| ATOM | 7739 | CD  | LYS | 379 | 35.001 | -66.586 | 66.833 | 1.00 | 0.00 |
| C    |      |     |     |     |        |         |        |      |      |

|      |      |     |     |     |        |         |        |      |      |
|------|------|-----|-----|-----|--------|---------|--------|------|------|
| ATOM | 7740 | CE  | LYS | 379 | 35.438 | -65.719 | 67.982 | 1.00 | 0.00 |
| C    |      |     |     |     |        |         |        |      |      |
| ATOM | 7741 | NZ  | LYS | 379 | 34.343 | -65.423 | 68.895 | 1.00 | 0.00 |
| N1+  |      |     |     |     |        |         |        |      |      |
| ATOM | 7742 | C   | LYS | 379 | 35.551 | -66.165 | 63.070 | 1.00 | 0.00 |
| C    |      |     |     |     |        |         |        |      |      |
| ATOM | 7743 | O   | LYS | 379 | 35.050 | -65.143 | 63.525 | 1.00 | 0.00 |
| O    |      |     |     |     |        |         |        |      |      |
| ATOM | 7744 | N   | ARG | 380 | 36.543 | -66.091 | 62.147 | 1.00 | 0.00 |
| N    |      |     |     |     |        |         |        |      |      |
| ATOM | 7745 | CA  | ARG | 380 | 36.931 | -64.917 | 61.397 | 1.00 | 0.00 |
| C    |      |     |     |     |        |         |        |      |      |
| ATOM | 7746 | CB  | ARG | 380 | 38.173 | -65.280 | 60.567 | 1.00 | 0.00 |
| C    |      |     |     |     |        |         |        |      |      |
| ATOM | 7747 | CG  | ARG | 380 | 38.801 | -64.041 | 59.766 | 1.00 | 0.00 |
| C    |      |     |     |     |        |         |        |      |      |
| ATOM | 7748 | CD  | ARG | 380 | 39.545 | -63.013 | 60.498 | 1.00 | 0.00 |
| C    |      |     |     |     |        |         |        |      |      |
| ATOM | 7749 | NE  | ARG | 380 | 39.966 | -61.851 | 59.595 | 1.00 | 0.00 |
| N    |      |     |     |     |        |         |        |      |      |
| ATOM | 7750 | CZ  | ARG | 380 | 40.826 | -60.868 | 59.863 | 1.00 | 0.00 |
| C    |      |     |     |     |        |         |        |      |      |
| ATOM | 7751 | NH1 | ARG | 380 | 41.016 | -59.857 | 59.078 | 1.00 | 0.00 |
| N    |      |     |     |     |        |         |        |      |      |
| ATOM | 7752 | NH2 | ARG | 380 | 41.548 | -60.910 | 60.903 | 1.00 | 0.00 |
| N1+  |      |     |     |     |        |         |        |      |      |
| ATOM | 7753 | C   | ARG | 380 | 35.872 | -64.416 | 60.433 | 1.00 | 0.00 |
| C    |      |     |     |     |        |         |        |      |      |
| ATOM | 7754 | O   | ARG | 380 | 35.569 | -63.245 | 60.420 | 1.00 | 0.00 |
| O    |      |     |     |     |        |         |        |      |      |
| ATOM | 7755 | N   | LYS | 381 | 35.259 | -65.322 | 59.588 | 1.00 | 0.00 |
| N    |      |     |     |     |        |         |        |      |      |
| ATOM | 7756 | CA  | LYS | 381 | 34.189 | -64.974 | 58.605 | 1.00 | 0.00 |
| C    |      |     |     |     |        |         |        |      |      |
| ATOM | 7757 | CB  | LYS | 381 | 33.721 | -66.198 | 57.883 | 1.00 | 0.00 |
| C    |      |     |     |     |        |         |        |      |      |
| ATOM | 7758 | CG  | LYS | 381 | 32.909 | -65.987 | 56.611 | 1.00 | 0.00 |
| C    |      |     |     |     |        |         |        |      |      |
| ATOM | 7759 | CD  | LYS | 381 | 32.429 | -67.320 | 55.954 | 1.00 | 0.00 |
| C    |      |     |     |     |        |         |        |      |      |
| ATOM | 7760 | CE  | LYS | 381 | 33.506 | -67.916 | 55.104 | 1.00 | 0.00 |
| C    |      |     |     |     |        |         |        |      |      |
| ATOM | 7761 | NZ  | LYS | 381 | 32.906 | -68.769 | 54.081 | 1.00 | 0.00 |
| N1+  |      |     |     |     |        |         |        |      |      |
| ATOM | 7762 | C   | LYS | 381 | 33.056 | -64.101 | 59.318 | 1.00 | 0.00 |
| C    |      |     |     |     |        |         |        |      |      |
| ATOM | 7763 | O   | LYS | 381 | 32.656 | -63.064 | 58.800 | 1.00 | 0.00 |
| O    |      |     |     |     |        |         |        |      |      |
| ATOM | 7764 | N   | PHE | 382 | 32.555 | -64.660 | 60.380 | 1.00 | 0.00 |
| N    |      |     |     |     |        |         |        |      |      |
| ATOM | 7765 | CA  | PHE | 382 | 31.336 | -64.316 | 61.074 | 1.00 | 0.00 |
| C    |      |     |     |     |        |         |        |      |      |
| ATOM | 7766 | CB  | PHE | 382 | 30.615 | -65.522 | 61.630 | 1.00 | 0.00 |
| C    |      |     |     |     |        |         |        |      |      |

|      |      |     |     |     |        |         |        |      |      |
|------|------|-----|-----|-----|--------|---------|--------|------|------|
| ATOM | 7767 | CG  | PHE | 382 | 30.005 | -66.445 | 60.556 | 1.00 | 0.00 |
| C    |      |     |     |     |        |         |        |      |      |
| ATOM | 7768 | CD1 | PHE | 382 | 30.292 | -67.808 | 60.556 | 1.00 | 0.00 |
| C    |      |     |     |     |        |         |        |      |      |
| ATOM | 7769 | CE1 | PHE | 382 | 29.876 | -68.667 | 59.532 | 1.00 | 0.00 |
| C    |      |     |     |     |        |         |        |      |      |
| ATOM | 7770 | CZ  | PHE | 382 | 28.902 | -68.179 | 58.633 | 1.00 | 0.00 |
| C    |      |     |     |     |        |         |        |      |      |
| ATOM | 7771 | CE2 | PHE | 382 | 28.416 | -66.833 | 58.678 | 1.00 | 0.00 |
| C    |      |     |     |     |        |         |        |      |      |
| ATOM | 7772 | CD2 | PHE | 382 | 28.989 | -65.968 | 59.670 | 1.00 | 0.00 |
| C    |      |     |     |     |        |         |        |      |      |
| ATOM | 7773 | C   | PHE | 382 | 31.336 | -63.042 | 61.997 | 1.00 | 0.00 |
| C    |      |     |     |     |        |         |        |      |      |
| ATOM | 7774 | O   | PHE | 382 | 30.325 | -62.578 | 62.601 | 1.00 | 0.00 |
| O    |      |     |     |     |        |         |        |      |      |
| ATOM | 7775 | N   | HID | 383 | 32.514 | -62.274 | 61.973 | 1.00 | 0.00 |
| N    |      |     |     |     |        |         |        |      |      |
| ATOM | 7776 | CA  | HID | 383 | 32.658 | -61.049 | 62.682 | 1.00 | 0.00 |
| C    |      |     |     |     |        |         |        |      |      |
| ATOM | 7777 | CB  | HID | 383 | 34.083 | -60.459 | 62.370 | 1.00 | 0.00 |
| C    |      |     |     |     |        |         |        |      |      |
| ATOM | 7778 | CG  | HID | 383 | 34.482 | -59.722 | 63.564 | 1.00 | 0.00 |
| C    |      |     |     |     |        |         |        |      |      |
| ATOM | 7779 | ND1 | HID | 383 | 34.080 | -58.510 | 64.052 | 1.00 | 0.00 |
| N    |      |     |     |     |        |         |        |      |      |
| ATOM | 7780 | CE1 | HID | 383 | 34.746 | -58.319 | 65.172 | 1.00 | 0.00 |
| C    |      |     |     |     |        |         |        |      |      |
| ATOM | 7781 | NE2 | HID | 383 | 35.503 | -59.335 | 65.528 | 1.00 | 0.00 |
| N    |      |     |     |     |        |         |        |      |      |
| ATOM | 7782 | CD2 | HID | 383 | 35.400 | -60.203 | 64.435 | 1.00 | 0.00 |
| C    |      |     |     |     |        |         |        |      |      |
| ATOM | 7783 | C   | HID | 383 | 31.592 | -59.945 | 62.311 | 1.00 | 0.00 |
| C    |      |     |     |     |        |         |        |      |      |
| ATOM | 7784 | O   | HID | 383 | 31.324 | -59.044 | 63.129 | 1.00 | 0.00 |
| O    |      |     |     |     |        |         |        |      |      |
| ATOM | 7785 | N   | CYS | 384 | 30.903 | -60.070 | 61.161 | 1.00 | 0.00 |
| N    |      |     |     |     |        |         |        |      |      |
| ATOM | 7786 | CA  | CYS | 384 | 29.678 | -59.299 | 60.854 | 1.00 | 0.00 |
| C    |      |     |     |     |        |         |        |      |      |
| ATOM | 7787 | CB  | CYS | 384 | 29.204 | -59.570 | 59.407 | 1.00 | 0.00 |
| C    |      |     |     |     |        |         |        |      |      |
| ATOM | 7788 | SG  | CYS | 384 | 29.048 | -61.378 | 59.120 | 1.00 | 0.00 |
| S    |      |     |     |     |        |         |        |      |      |
| ATOM | 7789 | C   | CYS | 384 | 28.418 | -59.544 | 61.780 | 1.00 | 0.00 |
| C    |      |     |     |     |        |         |        |      |      |
| ATOM | 7790 | O   | CYS | 384 | 27.747 | -58.526 | 62.123 | 1.00 | 0.00 |
| O    |      |     |     |     |        |         |        |      |      |
| ATOM | 7791 | N   | ALA | 385 | 28.194 | -60.758 | 62.235 | 1.00 | 0.00 |
| N    |      |     |     |     |        |         |        |      |      |
| ATOM | 7792 | CA  | ALA | 385 | 27.225 | -61.055 | 63.293 | 1.00 | 0.00 |
| C    |      |     |     |     |        |         |        |      |      |
| ATOM | 7793 | CB  | ALA | 385 | 27.036 | -62.612 | 63.234 | 1.00 | 0.00 |
| C    |      |     |     |     |        |         |        |      |      |

|      |      |     |     |     |        |         |        |      |      |
|------|------|-----|-----|-----|--------|---------|--------|------|------|
| ATOM | 7794 | C   | ALA | 385 | 27.599 | -60.578 | 64.697 | 1.00 | 0.00 |
| C    |      |     |     |     |        |         |        |      |      |
| ATOM | 7795 | O   | ALA | 385 | 26.725 | -60.577 | 65.505 | 1.00 | 0.00 |
| O    |      |     |     |     |        |         |        |      |      |
| ATOM | 7796 | N   | ASN | 386 | 28.835 | -60.142 | 64.918 | 1.00 | 0.00 |
| N    |      |     |     |     |        |         |        |      |      |
| ATOM | 7797 | CA  | ASN | 386 | 29.161 | -59.515 | 66.184 | 1.00 | 0.00 |
| C    |      |     |     |     |        |         |        |      |      |
| ATOM | 7798 | CB  | ASN | 386 | 30.636 | -59.809 | 66.564 | 1.00 | 0.00 |
| C    |      |     |     |     |        |         |        |      |      |
| ATOM | 7799 | CG  | ASN | 386 | 30.974 | -61.259 | 66.861 | 1.00 | 0.00 |
| C    |      |     |     |     |        |         |        |      |      |
| ATOM | 7800 | OD1 | ASN | 386 | 30.585 | -62.251 | 66.225 | 1.00 | 0.00 |
| O    |      |     |     |     |        |         |        |      |      |
| ATOM | 7801 | ND2 | ASN | 386 | 31.807 | -61.477 | 67.814 | 1.00 | 0.00 |
| N    |      |     |     |     |        |         |        |      |      |
| ATOM | 7802 | C   | ASN | 386 | 28.883 | -58.056 | 66.140 | 1.00 | 0.00 |
| C    |      |     |     |     |        |         |        |      |      |
| ATOM | 7803 | O   | ASN | 386 | 28.442 | -57.483 | 67.151 | 1.00 | 0.00 |
| O    |      |     |     |     |        |         |        |      |      |
| ATOM | 7804 | N   | LEU | 387 | 28.983 | -57.454 | 64.987 | 1.00 | 0.00 |
| N    |      |     |     |     |        |         |        |      |      |
| ATOM | 7805 | CA  | LEU | 387 | 28.996 | -56.008 | 64.707 | 1.00 | 0.00 |
| C    |      |     |     |     |        |         |        |      |      |
| ATOM | 7806 | CB  | LEU | 387 | 30.441 | -55.586 | 64.172 | 1.00 | 0.00 |
| C    |      |     |     |     |        |         |        |      |      |
| ATOM | 7807 | CG  | LEU | 387 | 31.658 | -55.701 | 65.080 | 1.00 | 0.00 |
| C    |      |     |     |     |        |         |        |      |      |
| ATOM | 7808 | CD1 | LEU | 387 | 32.895 | -55.075 | 64.499 | 1.00 | 0.00 |
| C    |      |     |     |     |        |         |        |      |      |
| ATOM | 7809 | CD2 | LEU | 387 | 31.308 | -54.942 | 66.437 | 1.00 | 0.00 |
| C    |      |     |     |     |        |         |        |      |      |
| ATOM | 7810 | C   | LEU | 387 | 27.837 | -55.427 | 63.828 | 1.00 | 0.00 |
| C    |      |     |     |     |        |         |        |      |      |
| ATOM | 7811 | O   | LEU | 387 | 27.939 | -54.318 | 63.364 | 1.00 | 0.00 |
| O    |      |     |     |     |        |         |        |      |      |
| ATOM | 7812 | N   | THR | 388 | 26.759 | -56.190 | 63.664 | 1.00 | 0.00 |
| N    |      |     |     |     |        |         |        |      |      |
| ATOM | 7813 | CA  | THR | 388 | 25.504 | -55.755 | 63.008 | 1.00 | 0.00 |
| C    |      |     |     |     |        |         |        |      |      |
| ATOM | 7814 | CB  | THR | 388 | 25.577 | -55.886 | 61.470 | 1.00 | 0.00 |
| C    |      |     |     |     |        |         |        |      |      |
| ATOM | 7815 | CG2 | THR | 388 | 26.667 | -55.021 | 60.715 | 1.00 | 0.00 |
| C    |      |     |     |     |        |         |        |      |      |
| ATOM | 7816 | OG1 | THR | 388 | 25.723 | -57.253 | 61.044 | 1.00 | 0.00 |
| O    |      |     |     |     |        |         |        |      |      |
| ATOM | 7817 | C   | THR | 388 | 24.316 | -56.563 | 63.573 | 1.00 | 0.00 |
| C    |      |     |     |     |        |         |        |      |      |
| ATOM | 7818 | O   | THR | 388 | 24.578 | -57.584 | 64.128 | 1.00 | 0.00 |
| O    |      |     |     |     |        |         |        |      |      |
| ATOM | 7819 | N   | SER | 389 | 23.056 | -56.132 | 63.360 | 1.00 | 0.00 |
| N    |      |     |     |     |        |         |        |      |      |
| ATOM | 7820 | CA  | SER | 389 | 21.807 | -56.763 | 63.922 | 1.00 | 0.00 |
| C    |      |     |     |     |        |         |        |      |      |

|      |      |     |     |     |        |         |        |      |      |
|------|------|-----|-----|-----|--------|---------|--------|------|------|
| ATOM | 7821 | CB  | SER | 389 | 20.597 | -55.793 | 63.720 | 1.00 | 0.00 |
| C    |      |     |     |     |        |         |        |      |      |
| ATOM | 7822 | OG  | SER | 389 | 20.217 | -55.664 | 62.336 | 1.00 | 0.00 |
| O    |      |     |     |     |        |         |        |      |      |
| ATOM | 7823 | C   | SER | 389 | 21.502 | -58.166 | 63.321 | 1.00 | 0.00 |
| C    |      |     |     |     |        |         |        |      |      |
| ATOM | 7824 | O   | SER | 389 | 20.688 | -58.930 | 63.902 | 1.00 | 0.00 |
| O    |      |     |     |     |        |         |        |      |      |
| ATOM | 7825 | N   | TRP | 390 | 22.025 | -58.572 | 62.137 | 1.00 | 0.00 |
| N    |      |     |     |     |        |         |        |      |      |
| ATOM | 7826 | CA  | TRP | 390 | 21.804 | -59.986 | 61.744 | 1.00 | 0.00 |
| C    |      |     |     |     |        |         |        |      |      |
| ATOM | 7827 | CB  | TRP | 390 | 21.969 | -60.293 | 60.258 | 1.00 | 0.00 |
| C    |      |     |     |     |        |         |        |      |      |
| ATOM | 7828 | CG  | TRP | 390 | 20.900 | -59.876 | 59.271 | 1.00 | 0.00 |
| C    |      |     |     |     |        |         |        |      |      |
| ATOM | 7829 | CD1 | TRP | 390 | 19.796 | -59.211 | 59.551 | 1.00 | 0.00 |
| C    |      |     |     |     |        |         |        |      |      |
| ATOM | 7830 | NE1 | TRP | 390 | 19.057 | -59.072 | 58.361 | 1.00 | 0.00 |
| N    |      |     |     |     |        |         |        |      |      |
| ATOM | 7831 | CE2 | TRP | 390 | 19.665 | -59.758 | 57.274 | 1.00 | 0.00 |
| C    |      |     |     |     |        |         |        |      |      |
| ATOM | 7832 | CZ2 | TRP | 390 | 19.418 | -59.928 | 55.896 | 1.00 | 0.00 |
| C    |      |     |     |     |        |         |        |      |      |
| ATOM | 7833 | CH2 | TRP | 390 | 20.336 | -60.597 | 55.098 | 1.00 | 0.00 |
| C    |      |     |     |     |        |         |        |      |      |
| ATOM | 7834 | CZ3 | TRP | 390 | 21.589 | -61.076 | 55.631 | 1.00 | 0.00 |
| C    |      |     |     |     |        |         |        |      |      |
| ATOM | 7835 | CE3 | TRP | 390 | 21.761 | -60.943 | 57.010 | 1.00 | 0.00 |
| C    |      |     |     |     |        |         |        |      |      |
| ATOM | 7836 | CD2 | TRP | 390 | 20.920 | -60.240 | 57.856 | 1.00 | 0.00 |
| C    |      |     |     |     |        |         |        |      |      |
| ATOM | 7837 | C   | TRP | 390 | 22.600 | -61.009 | 62.548 | 1.00 | 0.00 |
| C    |      |     |     |     |        |         |        |      |      |
| ATOM | 7838 | O   | TRP | 390 | 23.749 | -60.609 | 62.942 | 1.00 | 0.00 |
| O    |      |     |     |     |        |         |        |      |      |
| ATOM | 7839 | N   | PRO | 391 | 22.089 | -62.203 | 62.900 | 1.00 | 0.00 |
| N    |      |     |     |     |        |         |        |      |      |
| ATOM | 7840 | CD  | PRO | 391 | 20.710 | -62.652 | 62.593 | 1.00 | 0.00 |
| C    |      |     |     |     |        |         |        |      |      |
| ATOM | 7841 | CG  | PRO | 391 | 20.438 | -64.062 | 63.068 | 1.00 | 0.00 |
| C    |      |     |     |     |        |         |        |      |      |
| ATOM | 7842 | CB  | PRO | 391 | 21.567 | -64.103 | 64.096 | 1.00 | 0.00 |
| C    |      |     |     |     |        |         |        |      |      |
| ATOM | 7843 | CA  | PRO | 391 | 22.741 | -63.255 | 63.620 | 1.00 | 0.00 |
| C    |      |     |     |     |        |         |        |      |      |
| ATOM | 7844 | C   | PRO | 391 | 23.623 | -64.111 | 62.704 | 1.00 | 0.00 |
| C    |      |     |     |     |        |         |        |      |      |
| ATOM | 7845 | O   | PRO | 391 | 23.466 | -64.111 | 61.474 | 1.00 | 0.00 |
| O    |      |     |     |     |        |         |        |      |      |
| ATOM | 7846 | N   | ARG | 392 | 24.598 | -64.821 | 63.325 | 1.00 | 0.00 |
| N    |      |     |     |     |        |         |        |      |      |
| ATOM | 7847 | CA  | ARG | 392 | 25.390 | -65.832 | 62.645 | 1.00 | 0.00 |
| C    |      |     |     |     |        |         |        |      |      |

|      |      |     |     |     |        |         |        |      |      |
|------|------|-----|-----|-----|--------|---------|--------|------|------|
| ATOM | 7848 | CB  | ARG | 392 | 26.325 | -66.535 | 63.697 | 1.00 | 0.00 |
| C    |      |     |     |     |        |         |        |      |      |
| ATOM | 7849 | CG  | ARG | 392 | 27.200 | -67.608 | 63.092 | 1.00 | 0.00 |
| C    |      |     |     |     |        |         |        |      |      |
| ATOM | 7850 | CD  | ARG | 392 | 28.498 | -68.010 | 63.858 | 1.00 | 0.00 |
| C    |      |     |     |     |        |         |        |      |      |
| ATOM | 7851 | NE  | ARG | 392 | 28.954 | -69.310 | 63.429 | 1.00 | 0.00 |
| N    |      |     |     |     |        |         |        |      |      |
| ATOM | 7852 | CZ  | ARG | 392 | 30.150 | -69.802 | 63.523 | 1.00 | 0.00 |
| C    |      |     |     |     |        |         |        |      |      |
| ATOM | 7853 | NH1 | ARG | 392 | 31.049 | -69.176 | 64.155 | 1.00 | 0.00 |
| N    |      |     |     |     |        |         |        |      |      |
| ATOM | 7854 | NH2 | ARG | 392 | 30.418 | -70.930 | 62.969 | 1.00 | 0.00 |
| N1+  |      |     |     |     |        |         |        |      |      |
| ATOM | 7855 | C   | ARG | 392 | 24.535 | -66.866 | 61.854 | 1.00 | 0.00 |
| C    |      |     |     |     |        |         |        |      |      |
| ATOM | 7856 | O   | ARG | 392 | 24.960 | -67.127 | 60.764 | 1.00 | 0.00 |
| O    |      |     |     |     |        |         |        |      |      |
| ATOM | 7857 | N   | TRP | 393 | 23.396 | -67.416 | 62.365 | 1.00 | 0.00 |
| N    |      |     |     |     |        |         |        |      |      |
| ATOM | 7858 | CA  | TRP | 393 | 22.549 | -68.372 | 61.667 | 1.00 | 0.00 |
| C    |      |     |     |     |        |         |        |      |      |
| ATOM | 7859 | CB  | TRP | 393 | 21.399 | -68.840 | 62.527 | 1.00 | 0.00 |
| C    |      |     |     |     |        |         |        |      |      |
| ATOM | 7860 | CG  | TRP | 393 | 20.207 | -67.983 | 62.832 | 1.00 | 0.00 |
| C    |      |     |     |     |        |         |        |      |      |
| ATOM | 7861 | CD1 | TRP | 393 | 19.916 | -67.455 | 64.025 | 1.00 | 0.00 |
| C    |      |     |     |     |        |         |        |      |      |
| ATOM | 7862 | NE1 | TRP | 393 | 18.830 | -66.679 | 63.872 | 1.00 | 0.00 |
| N    |      |     |     |     |        |         |        |      |      |
| ATOM | 7863 | CE2 | TRP | 393 | 18.256 | -66.778 | 62.621 | 1.00 | 0.00 |
| C    |      |     |     |     |        |         |        |      |      |
| ATOM | 7864 | CZ2 | TRP | 393 | 17.113 | -66.232 | 61.975 | 1.00 | 0.00 |
| C    |      |     |     |     |        |         |        |      |      |
| ATOM | 7865 | CH2 | TRP | 393 | 16.762 | -66.585 | 60.683 | 1.00 | 0.00 |
| C    |      |     |     |     |        |         |        |      |      |
| ATOM | 7866 | CZ3 | TRP | 393 | 17.477 | -67.496 | 59.941 | 1.00 | 0.00 |
| C    |      |     |     |     |        |         |        |      |      |
| ATOM | 7867 | CE3 | TRP | 393 | 18.644 | -68.025 | 60.585 | 1.00 | 0.00 |
| C    |      |     |     |     |        |         |        |      |      |
| ATOM | 7868 | CD2 | TRP | 393 | 19.098 | -67.644 | 61.907 | 1.00 | 0.00 |
| C    |      |     |     |     |        |         |        |      |      |
| ATOM | 7869 | C   | TRP | 393 | 22.024 | -67.745 | 60.397 | 1.00 | 0.00 |
| C    |      |     |     |     |        |         |        |      |      |
| ATOM | 7870 | O   | TRP | 393 | 22.039 | -68.487 | 59.349 | 1.00 | 0.00 |
| O    |      |     |     |     |        |         |        |      |      |
| ATOM | 7871 | N   | LEU | 394 | 21.689 | -66.448 | 60.329 | 1.00 | 0.00 |
| N    |      |     |     |     |        |         |        |      |      |
| ATOM | 7872 | CA  | LEU | 394 | 21.110 | -65.939 | 59.115 | 1.00 | 0.00 |
| C    |      |     |     |     |        |         |        |      |      |
| ATOM | 7873 | CB  | LEU | 394 | 20.327 | -64.640 | 59.487 | 1.00 | 0.00 |
| C    |      |     |     |     |        |         |        |      |      |
| ATOM | 7874 | CG  | LEU | 394 | 19.730 | -63.825 | 58.316 | 1.00 | 0.00 |
| C    |      |     |     |     |        |         |        |      |      |

|      |      |     |     |     |        |         |        |      |      |
|------|------|-----|-----|-----|--------|---------|--------|------|------|
| ATOM | 7875 | CD1 | LEU | 394 | 18.894 | -64.642 | 57.333 | 1.00 | 0.00 |
| C    |      |     |     |     |        |         |        |      |      |
| ATOM | 7876 | CD2 | LEU | 394 | 18.825 | -62.751 | 58.867 | 1.00 | 0.00 |
| C    |      |     |     |     |        |         |        |      |      |
| ATOM | 7877 | C   | LEU | 394 | 22.226 | -65.710 | 58.131 | 1.00 | 0.00 |
| C    |      |     |     |     |        |         |        |      |      |
| ATOM | 7878 | O   | LEU | 394 | 22.038 | -66.034 | 56.947 | 1.00 | 0.00 |
| O    |      |     |     |     |        |         |        |      |      |
| ATOM | 7879 | N   | TYR | 395 | 23.452 | -65.158 | 58.463 | 1.00 | 0.00 |
| N    |      |     |     |     |        |         |        |      |      |
| ATOM | 7880 | CA  | TYR | 395 | 24.543 | -65.026 | 57.519 | 1.00 | 0.00 |
| C    |      |     |     |     |        |         |        |      |      |
| ATOM | 7881 | CB  | TYR | 395 | 25.727 | -64.330 | 58.173 | 1.00 | 0.00 |
| C    |      |     |     |     |        |         |        |      |      |
| ATOM | 7882 | CG  | TYR | 395 | 25.560 | -62.765 | 58.351 | 1.00 | 0.00 |
| C    |      |     |     |     |        |         |        |      |      |
| ATOM | 7883 | CD1 | TYR | 395 | 25.719 | -61.941 | 57.190 | 1.00 | 0.00 |
| C    |      |     |     |     |        |         |        |      |      |
| ATOM | 7884 | CE1 | TYR | 395 | 25.628 | -60.575 | 57.290 | 1.00 | 0.00 |
| C    |      |     |     |     |        |         |        |      |      |
| ATOM | 7885 | CZ  | TYR | 395 | 25.384 | -59.970 | 58.587 | 1.00 | 0.00 |
| C    |      |     |     |     |        |         |        |      |      |
| ATOM | 7886 | OH  | TYR | 395 | 25.241 | -58.578 | 58.673 | 1.00 | 0.00 |
| O    |      |     |     |     |        |         |        |      |      |
| ATOM | 7887 | CE2 | TYR | 395 | 25.260 | -60.776 | 59.724 | 1.00 | 0.00 |
| C    |      |     |     |     |        |         |        |      |      |
| ATOM | 7888 | CD2 | TYR | 395 | 25.306 | -62.162 | 59.610 | 1.00 | 0.00 |
| C    |      |     |     |     |        |         |        |      |      |
| ATOM | 7889 | C   | TYR | 395 | 24.968 | -66.450 | 56.942 | 1.00 | 0.00 |
| C    |      |     |     |     |        |         |        |      |      |
| ATOM | 7890 | O   | TYR | 395 | 25.334 | -66.497 | 55.782 | 1.00 | 0.00 |
| O    |      |     |     |     |        |         |        |      |      |
| ATOM | 7891 | N   | SER | 396 | 24.861 | -67.557 | 57.737 | 1.00 | 0.00 |
| N    |      |     |     |     |        |         |        |      |      |
| ATOM | 7892 | CA  | SER | 396 | 25.224 | -68.918 | 57.312 | 1.00 | 0.00 |
| C    |      |     |     |     |        |         |        |      |      |
| ATOM | 7893 | CB  | SER | 396 | 25.207 | -69.768 | 58.577 | 1.00 | 0.00 |
| C    |      |     |     |     |        |         |        |      |      |
| ATOM | 7894 | OG  | SER | 396 | 26.099 | -69.306 | 59.571 | 1.00 | 0.00 |
| O    |      |     |     |     |        |         |        |      |      |
| ATOM | 7895 | C   | SER | 396 | 24.262 | -69.515 | 56.323 | 1.00 | 0.00 |
| C    |      |     |     |     |        |         |        |      |      |
| ATOM | 7896 | O   | SER | 396 | 24.633 | -70.497 | 55.714 | 1.00 | 0.00 |
| O    |      |     |     |     |        |         |        |      |      |
| ATOM | 7897 | N   | LEU | 397 | 23.121 | -68.892 | 56.071 | 1.00 | 0.00 |
| N    |      |     |     |     |        |         |        |      |      |
| ATOM | 7898 | CA  | LEU | 397 | 22.360 | -69.161 | 54.860 | 1.00 | 0.00 |
| C    |      |     |     |     |        |         |        |      |      |
| ATOM | 7899 | CB  | LEU | 397 | 20.845 | -69.378 | 55.385 | 1.00 | 0.00 |
| C    |      |     |     |     |        |         |        |      |      |
| ATOM | 7900 | CG  | LEU | 397 | 20.628 | -70.550 | 56.325 | 1.00 | 0.00 |
| C    |      |     |     |     |        |         |        |      |      |
| ATOM | 7901 | CD1 | LEU | 397 | 19.414 | -70.259 | 57.229 | 1.00 | 0.00 |
| C    |      |     |     |     |        |         |        |      |      |



|      |      |     |     |     |        |         |        |      |      |
|------|------|-----|-----|-----|--------|---------|--------|------|------|
| ATOM | 7902 | CD2 | LEU | 397 | 20.470 | -71.901 | 55.510 | 1.00 | 0.00 |
| C    |      |     |     |     |        |         |        |      |      |
| ATOM | 7903 | C   | LEU | 397 | 22.553 | -68.103 | 53.722 | 1.00 | 0.00 |
| C    |      |     |     |     |        |         |        |      |      |
| ATOM | 7904 | O   | LEU | 397 | 21.694 | -68.093 | 52.843 | 1.00 | 0.00 |
| O    |      |     |     |     |        |         |        |      |      |
| ATOM | 7905 | N   | TYR | 398 | 23.613 | -67.220 | 53.665 | 1.00 | 0.00 |
| N    |      |     |     |     |        |         |        |      |      |
| ATOM | 7906 | CA  | TYR | 398 | 23.823 | -66.303 | 52.590 | 1.00 | 0.00 |
| C    |      |     |     |     |        |         |        |      |      |
| ATOM | 7907 | CB  | TYR | 398 | 23.369 | -64.902 | 53.064 | 1.00 | 0.00 |
| C    |      |     |     |     |        |         |        |      |      |
| ATOM | 7908 | CG  | TYR | 398 | 21.836 | -64.567 | 52.927 | 1.00 | 0.00 |
| C    |      |     |     |     |        |         |        |      |      |
| ATOM | 7909 | CD1 | TYR | 398 | 21.286 | -64.605 | 51.621 | 1.00 | 0.00 |
| C    |      |     |     |     |        |         |        |      |      |
| ATOM | 7910 | CE1 | TYR | 398 | 19.986 | -64.243 | 51.404 | 1.00 | 0.00 |
| C    |      |     |     |     |        |         |        |      |      |
| ATOM | 7911 | CZ  | TYR | 398 | 19.144 | -63.917 | 52.483 | 1.00 | 0.00 |
| C    |      |     |     |     |        |         |        |      |      |
| ATOM | 7912 | OH  | TYR | 398 | 17.827 | -63.607 | 52.260 | 1.00 | 0.00 |
| O    |      |     |     |     |        |         |        |      |      |
| ATOM | 7913 | CE2 | TYR | 398 | 19.648 | -63.793 | 53.800 | 1.00 | 0.00 |
| C    |      |     |     |     |        |         |        |      |      |
| ATOM | 7914 | CD2 | TYR | 398 | 21.007 | -64.173 | 54.034 | 1.00 | 0.00 |
| C    |      |     |     |     |        |         |        |      |      |
| ATOM | 7915 | C   | TYR | 398 | 25.396 | -66.300 | 52.202 | 1.00 | 0.00 |
| C    |      |     |     |     |        |         |        |      |      |
| ATOM | 7916 | O   | TYR | 398 | 25.747 | -65.684 | 51.234 | 1.00 | 0.00 |
| O    |      |     |     |     |        |         |        |      |      |
| ATOM | 7917 | N   | ASP | 399 | 26.250 | -67.052 | 52.938 | 1.00 | 0.00 |
| N    |      |     |     |     |        |         |        |      |      |
| ATOM | 7918 | CA  | ASP | 399 | 27.509 | -67.616 | 52.505 | 1.00 | 0.00 |
| C    |      |     |     |     |        |         |        |      |      |
| ATOM | 7919 | CB  | ASP | 399 | 28.329 | -67.778 | 53.817 | 1.00 | 0.00 |
| C    |      |     |     |     |        |         |        |      |      |
| ATOM | 7920 | CG  | ASP | 399 | 29.729 | -68.398 | 53.594 | 1.00 | 0.00 |
| C    |      |     |     |     |        |         |        |      |      |
| ATOM | 7921 | OD1 | ASP | 399 | 30.012 | -69.403 | 54.220 | 1.00 | 0.00 |
| O    |      |     |     |     |        |         |        |      |      |
| ATOM | 7922 | OD2 | ASP | 399 | 30.507 | -67.822 | 52.791 | 1.00 | 0.00 |
| O1-  |      |     |     |     |        |         |        |      |      |
| ATOM | 7923 | C   | ASP | 399 | 27.296 | -68.947 | 51.814 | 1.00 | 0.00 |
| C    |      |     |     |     |        |         |        |      |      |
| ATOM | 7924 | O   | ASP | 399 | 26.910 | -69.923 | 52.392 | 1.00 | 0.00 |
| O    |      |     |     |     |        |         |        |      |      |
| ATOM | 7925 | N   | ALA | 400 | 27.703 | -69.035 | 50.574 | 1.00 | 0.00 |
| N    |      |     |     |     |        |         |        |      |      |
| ATOM | 7926 | CA  | ALA | 400 | 27.570 | -70.233 | 49.749 | 1.00 | 0.00 |
| C    |      |     |     |     |        |         |        |      |      |
| ATOM | 7927 | CB  | ALA | 400 | 28.012 | -69.841 | 48.297 | 1.00 | 0.00 |
| C    |      |     |     |     |        |         |        |      |      |
| ATOM | 7928 | C   | ALA | 400 | 28.478 | -71.306 | 50.304 | 1.00 | 0.00 |
| C    |      |     |     |     |        |         |        |      |      |

|      |      |     |     |     |        |         |        |      |      |
|------|------|-----|-----|-----|--------|---------|--------|------|------|
| ATOM | 7929 | O   | ALA | 400 | 28.131 | -72.468 | 50.206 | 1.00 | 0.00 |
| O    |      |     |     |     |        |         |        |      |      |
| ATOM | 7930 | N   | GLU | 401 | 29.622 | -70.980 | 50.921 | 1.00 | 0.00 |
| N    |      |     |     |     |        |         |        |      |      |
| ATOM | 7931 | CA  | GLU | 401 | 30.461 | -71.948 | 51.620 | 1.00 | 0.00 |
| C    |      |     |     |     |        |         |        |      |      |
| ATOM | 7932 | CB  | GLU | 401 | 31.831 | -71.335 | 51.850 | 1.00 | 0.00 |
| C    |      |     |     |     |        |         |        |      |      |
| ATOM | 7933 | CG  | GLU | 401 | 32.874 | -72.360 | 52.198 | 1.00 | 0.00 |
| C    |      |     |     |     |        |         |        |      |      |
| ATOM | 7934 | CD  | GLU | 401 | 34.305 | -71.783 | 52.414 | 1.00 | 0.00 |
| C    |      |     |     |     |        |         |        |      |      |
| ATOM | 7935 | OE1 | GLU | 401 | 34.434 | -70.549 | 52.293 | 1.00 | 0.00 |
| O    |      |     |     |     |        |         |        |      |      |
| ATOM | 7936 | OE2 | GLU | 401 | 35.316 | -72.569 | 52.626 | 1.00 | 0.00 |
| O1-  |      |     |     |     |        |         |        |      |      |
| ATOM | 7937 | C   | GLU | 401 | 29.800 | -72.615 | 52.886 | 1.00 | 0.00 |
| C    |      |     |     |     |        |         |        |      |      |
| ATOM | 7938 | O   | GLU | 401 | 29.955 | -73.880 | 52.960 | 1.00 | 0.00 |
| O    |      |     |     |     |        |         |        |      |      |
| ATOM | 7939 | N   | THR | 402 | 29.110 | -71.951 | 53.784 | 1.00 | 0.00 |
| N    |      |     |     |     |        |         |        |      |      |
| ATOM | 7940 | CA  | THR | 402 | 28.369 | -72.524 | 54.876 | 1.00 | 0.00 |
| C    |      |     |     |     |        |         |        |      |      |
| ATOM | 7941 | CB  | THR | 402 | 28.208 | -71.525 | 56.026 | 1.00 | 0.00 |
| C    |      |     |     |     |        |         |        |      |      |
| ATOM | 7942 | CG2 | THR | 402 | 27.857 | -72.210 | 57.335 | 1.00 | 0.00 |
| C    |      |     |     |     |        |         |        |      |      |
| ATOM | 7943 | OG1 | THR | 402 | 29.392 | -70.768 | 56.266 | 1.00 | 0.00 |
| O    |      |     |     |     |        |         |        |      |      |
| ATOM | 7944 | C   | THR | 402 | 27.056 | -73.204 | 54.448 | 1.00 | 0.00 |
| C    |      |     |     |     |        |         |        |      |      |
| ATOM | 7945 | O   | THR | 402 | 26.585 | -74.101 | 55.165 | 1.00 | 0.00 |
| O    |      |     |     |     |        |         |        |      |      |
| ATOM | 7946 | N   | LEU | 403 | 26.445 | -72.813 | 53.302 | 1.00 | 0.00 |
| N    |      |     |     |     |        |         |        |      |      |
| ATOM | 7947 | CA  | LEU | 403 | 25.279 | -73.548 | 52.715 | 1.00 | 0.00 |
| C    |      |     |     |     |        |         |        |      |      |
| ATOM | 7948 | CB  | LEU | 403 | 24.611 | -72.704 | 51.539 | 1.00 | 0.00 |
| C    |      |     |     |     |        |         |        |      |      |
| ATOM | 7949 | CG  | LEU | 403 | 23.839 | -71.594 | 52.101 | 1.00 | 0.00 |
| C    |      |     |     |     |        |         |        |      |      |
| ATOM | 7950 | CD1 | LEU | 403 | 23.646 | -70.477 | 51.042 | 1.00 | 0.00 |
| C    |      |     |     |     |        |         |        |      |      |
| ATOM | 7951 | CD2 | LEU | 403 | 22.351 | -72.161 | 52.441 | 1.00 | 0.00 |
| C    |      |     |     |     |        |         |        |      |      |
| ATOM | 7952 | C   | LEU | 403 | 25.808 | -74.800 | 52.048 | 1.00 | 0.00 |
| C    |      |     |     |     |        |         |        |      |      |
| ATOM | 7953 | O   | LEU | 403 | 25.245 | -75.867 | 52.249 | 1.00 | 0.00 |
| O    |      |     |     |     |        |         |        |      |      |
| ATOM | 7954 | N   | MET | 404 | 26.950 | -74.737 | 51.321 | 1.00 | 0.00 |
| N    |      |     |     |     |        |         |        |      |      |
| ATOM | 7955 | CA  | MET | 404 | 27.477 | -75.992 | 50.698 | 1.00 | 0.00 |
| C    |      |     |     |     |        |         |        |      |      |

|      |      |     |     |     |        |         |        |      |      |
|------|------|-----|-----|-----|--------|---------|--------|------|------|
| ATOM | 7956 | CB  | MET | 404 | 28.644 | -75.588 | 49.741 | 1.00 | 0.00 |
| C    |      |     |     |     |        |         |        |      |      |
| ATOM | 7957 | CG  | MET | 404 | 28.149 | -75.089 | 48.385 | 1.00 | 0.00 |
| C    |      |     |     |     |        |         |        |      |      |
| ATOM | 7958 | SD  | MET | 404 | 29.451 | -74.866 | 47.058 | 1.00 | 0.00 |
| S    |      |     |     |     |        |         |        |      |      |
| ATOM | 7959 | CE  | MET | 404 | 30.129 | -73.369 | 47.838 | 1.00 | 0.00 |
| C    |      |     |     |     |        |         |        |      |      |
| ATOM | 7960 | C   | MET | 404 | 27.882 | -76.938 | 51.785 | 1.00 | 0.00 |
| C    |      |     |     |     |        |         |        |      |      |
| ATOM | 7961 | O   | MET | 404 | 27.673 | -78.135 | 51.582 | 1.00 | 0.00 |
| O    |      |     |     |     |        |         |        |      |      |
| ATOM | 7962 | N   | ASP | 405 | 28.350 | -76.418 | 52.937 | 1.00 | 0.00 |
| N    |      |     |     |     |        |         |        |      |      |
| ATOM | 7963 | CA  | ASP | 405 | 28.698 | -77.273 | 54.049 | 1.00 | 0.00 |
| C    |      |     |     |     |        |         |        |      |      |
| ATOM | 7964 | CB  | ASP | 405 | 29.344 | -76.379 | 55.084 | 1.00 | 0.00 |
| C    |      |     |     |     |        |         |        |      |      |
| ATOM | 7965 | CG  | ASP | 405 | 30.105 | -77.289 | 56.153 | 1.00 | 0.00 |
| C    |      |     |     |     |        |         |        |      |      |
| ATOM | 7966 | OD1 | ASP | 405 | 29.762 | -77.144 | 57.308 | 1.00 | 0.00 |
| O    |      |     |     |     |        |         |        |      |      |
| ATOM | 7967 | OD2 | ASP | 405 | 30.948 | -78.126 | 55.856 | 1.00 | 0.00 |
| O1-  |      |     |     |     |        |         |        |      |      |
| ATOM | 7968 | C   | ASP | 405 | 27.529 | -78.066 | 54.599 | 1.00 | 0.00 |
| C    |      |     |     |     |        |         |        |      |      |
| ATOM | 7969 | O   | ASP | 405 | 27.777 | -79.176 | 54.996 | 1.00 | 0.00 |
| O    |      |     |     |     |        |         |        |      |      |
| ATOM | 7970 | N   | ARG | 406 | 26.372 | -77.455 | 54.752 | 1.00 | 0.00 |
| N    |      |     |     |     |        |         |        |      |      |
| ATOM | 7971 | CA  | ARG | 406 | 25.132 | -78.077 | 55.260 | 1.00 | 0.00 |
| C    |      |     |     |     |        |         |        |      |      |
| ATOM | 7972 | CB  | ARG | 406 | 24.083 | -76.995 | 55.649 | 1.00 | 0.00 |
| C    |      |     |     |     |        |         |        |      |      |
| ATOM | 7973 | CG  | ARG | 406 | 23.102 | -77.540 | 56.729 | 1.00 | 0.00 |
| C    |      |     |     |     |        |         |        |      |      |
| ATOM | 7974 | CD  | ARG | 406 | 23.602 | -77.691 | 58.137 | 1.00 | 0.00 |
| C    |      |     |     |     |        |         |        |      |      |
| ATOM | 7975 | NE  | ARG | 406 | 22.564 | -78.244 | 58.977 | 1.00 | 0.00 |
| N    |      |     |     |     |        |         |        |      |      |
| ATOM | 7976 | CZ  | ARG | 406 | 21.560 | -77.661 | 59.617 | 1.00 | 0.00 |
| C    |      |     |     |     |        |         |        |      |      |
| ATOM | 7977 | NH1 | ARG | 406 | 21.279 | -76.401 | 59.572 | 1.00 | 0.00 |
| N    |      |     |     |     |        |         |        |      |      |
| ATOM | 7978 | NH2 | ARG | 406 | 20.650 | -78.489 | 60.146 | 1.00 | 0.00 |
| N1+  |      |     |     |     |        |         |        |      |      |
| ATOM | 7979 | C   | ARG | 406 | 24.637 | -79.049 | 54.230 | 1.00 | 0.00 |
| C    |      |     |     |     |        |         |        |      |      |
| ATOM | 7980 | O   | ARG | 406 | 24.228 | -80.151 | 54.596 | 1.00 | 0.00 |
| O    |      |     |     |     |        |         |        |      |      |
| ATOM | 7981 | N   | ILE | 407 | 24.570 | -78.668 | 52.964 | 1.00 | 0.00 |
| N    |      |     |     |     |        |         |        |      |      |
| ATOM | 7982 | CA  | ILE | 407 | 24.357 | -79.559 | 51.795 | 1.00 | 0.00 |
| C    |      |     |     |     |        |         |        |      |      |

|      |      |     |     |     |        |         |        |      |      |
|------|------|-----|-----|-----|--------|---------|--------|------|------|
| ATOM | 7983 | CB  | ILE | 407 | 24.603 | -78.848 | 50.409 | 1.00 | 0.00 |
| C    |      |     |     |     |        |         |        |      |      |
| ATOM | 7984 | CG2 | ILE | 407 | 24.723 | -79.754 | 49.203 | 1.00 | 0.00 |
| C    |      |     |     |     |        |         |        |      |      |
| ATOM | 7985 | CG1 | ILE | 407 | 23.475 | -77.797 | 50.334 | 1.00 | 0.00 |
| C    |      |     |     |     |        |         |        |      |      |
| ATOM | 7986 | CD1 | ILE | 407 | 23.650 | -76.771 | 49.191 | 1.00 | 0.00 |
| C    |      |     |     |     |        |         |        |      |      |
| ATOM | 7987 | C   | ILE | 407 | 25.259 | -80.809 | 51.814 | 1.00 | 0.00 |
| C    |      |     |     |     |        |         |        |      |      |
| ATOM | 7988 | O   | ILE | 407 | 24.731 | -81.895 | 51.995 | 1.00 | 0.00 |
| O    |      |     |     |     |        |         |        |      |      |
| ATOM | 7989 | N   | LYS | 408 | 26.554 | -80.670 | 51.822 | 1.00 | 0.00 |
| N    |      |     |     |     |        |         |        |      |      |
| ATOM | 7990 | CA  | LYS | 408 | 27.530 | -81.752 | 52.004 | 1.00 | 0.00 |
| C    |      |     |     |     |        |         |        |      |      |
| ATOM | 7991 | CB  | LYS | 408 | 28.962 | -81.168 | 52.197 | 1.00 | 0.00 |
| C    |      |     |     |     |        |         |        |      |      |
| ATOM | 7992 | CG  | LYS | 408 | 29.598 | -80.794 | 50.796 | 1.00 | 0.00 |
| C    |      |     |     |     |        |         |        |      |      |
| ATOM | 7993 | CD  | LYS | 408 | 30.860 | -79.919 | 51.086 | 1.00 | 0.00 |
| C    |      |     |     |     |        |         |        |      |      |
| ATOM | 7994 | CE  | LYS | 408 | 31.505 | -79.540 | 49.776 | 1.00 | 0.00 |
| C    |      |     |     |     |        |         |        |      |      |
| ATOM | 7995 | NZ  | LYS | 408 | 32.616 | -80.380 | 49.390 | 1.00 | 0.00 |
| N1+  |      |     |     |     |        |         |        |      |      |
| ATOM | 7996 | C   | LYS | 408 | 27.171 | -82.599 | 53.235 | 1.00 | 0.00 |
| C    |      |     |     |     |        |         |        |      |      |
| ATOM | 7997 | O   | LYS | 408 | 27.262 | -83.804 | 53.133 | 1.00 | 0.00 |
| O    |      |     |     |     |        |         |        |      |      |
| ATOM | 7998 | N   | LYS | 409 | 26.765 | -82.002 | 54.317 | 1.00 | 0.00 |
| N    |      |     |     |     |        |         |        |      |      |
| ATOM | 7999 | CA  | LYS | 409 | 26.274 | -82.787 | 55.475 | 1.00 | 0.00 |
| C    |      |     |     |     |        |         |        |      |      |
| ATOM | 8000 | CB  | LYS | 409 | 26.108 | -81.836 | 56.702 | 1.00 | 0.00 |
| C    |      |     |     |     |        |         |        |      |      |
| ATOM | 8001 | CG  | LYS | 409 | 25.989 | -82.598 | 58.021 | 1.00 | 0.00 |
| C    |      |     |     |     |        |         |        |      |      |
| ATOM | 8002 | CD  | LYS | 409 | 26.141 | -81.690 | 59.234 | 1.00 | 0.00 |
| C    |      |     |     |     |        |         |        |      |      |
| ATOM | 8003 | CE  | LYS | 409 | 25.741 | -82.338 | 60.554 | 1.00 | 0.00 |
| C    |      |     |     |     |        |         |        |      |      |
| ATOM | 8004 | NZ  | LYS | 409 | 26.123 | -81.534 | 61.728 | 1.00 | 0.00 |
| N1+  |      |     |     |     |        |         |        |      |      |
| ATOM | 8005 | C   | LYS | 409 | 25.055 | -83.703 | 55.334 | 1.00 | 0.00 |
| C    |      |     |     |     |        |         |        |      |      |
| ATOM | 8006 | O   | LYS | 409 | 25.089 | -84.813 | 55.824 | 1.00 | 0.00 |
| O    |      |     |     |     |        |         |        |      |      |
| ATOM | 8007 | N   | GLN | 410 | 24.021 | -83.235 | 54.700 | 1.00 | 0.00 |
| N    |      |     |     |     |        |         |        |      |      |
| ATOM | 8008 | CA  | GLN | 410 | 22.847 | -84.029 | 54.209 | 1.00 | 0.00 |
| C    |      |     |     |     |        |         |        |      |      |
| ATOM | 8009 | CB  | GLN | 410 | 21.709 | -83.098 | 53.709 | 1.00 | 0.00 |
| C    |      |     |     |     |        |         |        |      |      |

|      |      |     |     |     |        |         |        |      |      |
|------|------|-----|-----|-----|--------|---------|--------|------|------|
| ATOM | 8010 | CG  | GLN | 410 | 21.229 | -82.050 | 54.756 | 1.00 | 0.00 |
| C    |      |     |     |     |        |         |        |      |      |
| ATOM | 8011 | CD  | GLN | 410 | 19.979 | -82.512 | 55.556 | 1.00 | 0.00 |
| C    |      |     |     |     |        |         |        |      |      |
| ATOM | 8012 | OE1 | GLN | 410 | 19.551 | -83.634 | 55.532 | 1.00 | 0.00 |
| O    |      |     |     |     |        |         |        |      |      |
| ATOM | 8013 | NE2 | GLN | 410 | 19.293 | -81.631 | 56.273 | 1.00 | 0.00 |
| N    |      |     |     |     |        |         |        |      |      |
| ATOM | 8014 | C   | GLN | 410 | 23.253 | -85.033 | 53.142 | 1.00 | 0.00 |
| C    |      |     |     |     |        |         |        |      |      |
| ATOM | 8015 | O   | GLN | 410 | 22.759 | -86.123 | 53.016 | 1.00 | 0.00 |
| O    |      |     |     |     |        |         |        |      |      |
| ATOM | 8016 | N   | LEU | 411 | 24.238 | -84.692 | 52.295 | 1.00 | 0.00 |
| N    |      |     |     |     |        |         |        |      |      |
| ATOM | 8017 | CA  | LEU | 411 | 24.760 | -85.690 | 51.311 | 1.00 | 0.00 |
| C    |      |     |     |     |        |         |        |      |      |
| ATOM | 8018 | CB  | LEU | 411 | 25.637 | -84.954 | 50.266 | 1.00 | 0.00 |
| C    |      |     |     |     |        |         |        |      |      |
| ATOM | 8019 | CG  | LEU | 411 | 24.850 | -83.989 | 49.345 | 1.00 | 0.00 |
| C    |      |     |     |     |        |         |        |      |      |
| ATOM | 8020 | CD1 | LEU | 411 | 25.809 | -82.976 | 48.777 | 1.00 | 0.00 |
| C    |      |     |     |     |        |         |        |      |      |
| ATOM | 8021 | CD2 | LEU | 411 | 24.272 | -84.907 | 48.326 | 1.00 | 0.00 |
| C    |      |     |     |     |        |         |        |      |      |
| ATOM | 8022 | C   | LEU | 411 | 25.616 | -86.809 | 51.880 | 1.00 | 0.00 |
| C    |      |     |     |     |        |         |        |      |      |
| ATOM | 8023 | O   | LEU | 411 | 25.638 | -87.877 | 51.321 | 1.00 | 0.00 |
| O    |      |     |     |     |        |         |        |      |      |
| ATOM | 8024 | N   | ARG | 412 | 26.339 | -86.613 | 52.980 | 1.00 | 0.00 |
| N    |      |     |     |     |        |         |        |      |      |
| ATOM | 8025 | CA  | ARG | 412 | 26.925 | -87.652 | 53.863 | 1.00 | 0.00 |
| C    |      |     |     |     |        |         |        |      |      |
| ATOM | 8026 | CB  | ARG | 412 | 28.014 | -87.033 | 54.767 | 1.00 | 0.00 |
| C    |      |     |     |     |        |         |        |      |      |
| ATOM | 8027 | CG  | ARG | 412 | 29.314 | -86.764 | 54.066 | 1.00 | 0.00 |
| C    |      |     |     |     |        |         |        |      |      |
| ATOM | 8028 | CD  | ARG | 412 | 30.540 | -86.502 | 55.067 | 1.00 | 0.00 |
| C    |      |     |     |     |        |         |        |      |      |
| ATOM | 8029 | NE  | ARG | 412 | 30.174 | -85.611 | 56.175 | 1.00 | 0.00 |
| N    |      |     |     |     |        |         |        |      |      |
| ATOM | 8030 | CZ  | ARG | 412 | 29.914 | -84.331 | 56.160 | 1.00 | 0.00 |
| C    |      |     |     |     |        |         |        |      |      |
| ATOM | 8031 | NH1 | ARG | 412 | 30.148 | -83.596 | 55.124 | 1.00 | 0.00 |
| N    |      |     |     |     |        |         |        |      |      |
| ATOM | 8032 | NH2 | ARG | 412 | 29.424 | -83.676 | 57.173 | 1.00 | 0.00 |
| N1+  |      |     |     |     |        |         |        |      |      |
| ATOM | 8033 | C   | ARG | 412 | 25.906 | -88.439 | 54.742 | 1.00 | 0.00 |
| C    |      |     |     |     |        |         |        |      |      |
| ATOM | 8034 | O   | ARG | 412 | 26.215 | -89.505 | 55.203 | 1.00 | 0.00 |
| O    |      |     |     |     |        |         |        |      |      |
| ATOM | 8035 | N   | GLU | 413 | 24.663 | -87.891 | 54.923 | 1.00 | 0.00 |
| N    |      |     |     |     |        |         |        |      |      |
| ATOM | 8036 | CA  | GLU | 413 | 23.606 | -88.780 | 55.478 | 1.00 | 0.00 |
| C    |      |     |     |     |        |         |        |      |      |

|      |      |     |     |     |        |         |        |      |      |
|------|------|-----|-----|-----|--------|---------|--------|------|------|
| ATOM | 8037 | CB  | GLU | 413 | 22.352 | -87.977 | 55.684 | 1.00 | 0.00 |
| C    |      |     |     |     |        |         |        |      |      |
| ATOM | 8038 | CG  | GLU | 413 | 21.402 | -88.601 | 56.721 | 1.00 | 0.00 |
| C    |      |     |     |     |        |         |        |      |      |
| ATOM | 8039 | CD  | GLU | 413 | 22.039 | -88.831 | 58.068 | 1.00 | 0.00 |
| C    |      |     |     |     |        |         |        |      |      |
| ATOM | 8040 | OE1 | GLU | 413 | 21.627 | -89.702 | 58.817 | 1.00 | 0.00 |
| O    |      |     |     |     |        |         |        |      |      |
| ATOM | 8041 | OE2 | GLU | 413 | 22.708 | -87.864 | 58.552 | 1.00 | 0.00 |
| O1-  |      |     |     |     |        |         |        |      |      |
| ATOM | 8042 | C   | GLU | 413 | 23.222 | -89.884 | 54.395 | 1.00 | 0.00 |
| C    |      |     |     |     |        |         |        |      |      |
| ATOM | 8043 | O   | GLU | 413 | 22.980 | -91.019 | 54.720 | 1.00 | 0.00 |
| O    |      |     |     |     |        |         |        |      |      |
| ATOM | 8044 | N   | TRP | 414 | 23.310 | -89.569 | 53.065 | 1.00 | 0.00 |
| N    |      |     |     |     |        |         |        |      |      |
| ATOM | 8045 | CA  | TRP | 414 | 23.144 | -90.627 | 52.101 | 1.00 | 0.00 |
| C    |      |     |     |     |        |         |        |      |      |
| ATOM | 8046 | CB  | TRP | 414 | 22.810 | -90.036 | 50.756 | 1.00 | 0.00 |
| C    |      |     |     |     |        |         |        |      |      |
| ATOM | 8047 | CG  | TRP | 414 | 21.774 | -88.926 | 50.667 | 1.00 | 0.00 |
| C    |      |     |     |     |        |         |        |      |      |
| ATOM | 8048 | CD1 | TRP | 414 | 20.786 | -88.777 | 51.560 | 1.00 | 0.00 |
| C    |      |     |     |     |        |         |        |      |      |
| ATOM | 8049 | NE1 | TRP | 414 | 20.110 | -87.609 | 51.284 | 1.00 | 0.00 |
| N    |      |     |     |     |        |         |        |      |      |
| ATOM | 8050 | CE2 | TRP | 414 | 20.431 | -87.165 | 50.002 | 1.00 | 0.00 |
| C    |      |     |     |     |        |         |        |      |      |
| ATOM | 8051 | CZ2 | TRP | 414 | 19.897 | -86.164 | 49.223 | 1.00 | 0.00 |
| C    |      |     |     |     |        |         |        |      |      |
| ATOM | 8052 | CH2 | TRP | 414 | 20.513 | -85.856 | 48.007 | 1.00 | 0.00 |
| C    |      |     |     |     |        |         |        |      |      |
| ATOM | 8053 | CZ3 | TRP | 414 | 21.647 | -86.610 | 47.564 | 1.00 | 0.00 |
| C    |      |     |     |     |        |         |        |      |      |
| ATOM | 8054 | CE3 | TRP | 414 | 22.129 | -87.648 | 48.383 | 1.00 | 0.00 |
| C    |      |     |     |     |        |         |        |      |      |
| ATOM | 8055 | CD2 | TRP | 414 | 21.509 | -88.045 | 49.612 | 1.00 | 0.00 |
| C    |      |     |     |     |        |         |        |      |      |
| ATOM | 8056 | C   | TRP | 414 | 24.459 | -91.416 | 52.054 | 1.00 | 0.00 |
| C    |      |     |     |     |        |         |        |      |      |
| ATOM | 8057 | O   | TRP | 414 | 25.555 | -90.893 | 52.185 | 1.00 | 0.00 |
| O    |      |     |     |     |        |         |        |      |      |
| ATOM | 8058 | N   | ASP | 415 | 24.341 | -92.713 | 51.804 | 1.00 | 0.00 |
| N    |      |     |     |     |        |         |        |      |      |
| ATOM | 8059 | CA  | ASP | 415 | 25.378 | -93.644 | 51.972 | 1.00 | 0.00 |
| C    |      |     |     |     |        |         |        |      |      |
| ATOM | 8060 | CB  | ASP | 415 | 24.888 | -95.045 | 52.447 | 1.00 | 0.00 |
| C    |      |     |     |     |        |         |        |      |      |
| ATOM | 8061 | CG  | ASP | 415 | 25.929 | -95.946 | 53.130 | 1.00 | 0.00 |
| C    |      |     |     |     |        |         |        |      |      |
| ATOM | 8062 | OD1 | ASP | 415 | 26.966 | -95.495 | 53.666 | 1.00 | 0.00 |
| O    |      |     |     |     |        |         |        |      |      |
| ATOM | 8063 | OD2 | ASP | 415 | 25.645 | -97.133 | 53.231 | 1.00 | 0.00 |
| O1-  |      |     |     |     |        |         |        |      |      |

|      |      |     |     |     |        |         |        |      |      |
|------|------|-----|-----|-----|--------|---------|--------|------|------|
| ATOM | 8064 | C   | ASP | 415 | 26.182 | -93.816 | 50.631 | 1.00 | 0.00 |
| C    |      |     |     |     |        |         |        |      |      |
| ATOM | 8065 | O   | ASP | 415 | 25.662 | -93.434 | 49.555 | 1.00 | 0.00 |
| O    |      |     |     |     |        |         |        |      |      |
| ATOM | 8066 | N   | GLU | 416 | 27.441 | -94.287 | 50.801 | 1.00 | 0.00 |
| N    |      |     |     |     |        |         |        |      |      |
| ATOM | 8067 | CA  | GLU | 416 | 28.365 | -94.614 | 49.699 | 1.00 | 0.00 |
| C    |      |     |     |     |        |         |        |      |      |
| ATOM | 8068 | CB  | GLU | 416 | 28.122 | -95.975 | 49.062 | 1.00 | 0.00 |
| C    |      |     |     |     |        |         |        |      |      |
| ATOM | 8069 | CG  | GLU | 416 | 27.778 | -97.144 | 50.039 | 1.00 | 0.00 |
| C    |      |     |     |     |        |         |        |      |      |
| ATOM | 8070 | CD  | GLU | 416 | 29.107 | -97.646 | 50.731 | 1.00 | 0.00 |
| C    |      |     |     |     |        |         |        |      |      |
| ATOM | 8071 | OE1 | GLU | 416 | 29.229 | -98.838 | 51.025 | 1.00 | 0.00 |
| O    |      |     |     |     |        |         |        |      |      |
| ATOM | 8072 | OE2 | GLU | 416 | 30.034 | -96.846 | 51.025 | 1.00 | 0.00 |
| O1-  |      |     |     |     |        |         |        |      |      |
| ATOM | 8073 | C   | GLU | 416 | 28.634 | -93.418 | 48.726 | 1.00 | 0.00 |
| C    |      |     |     |     |        |         |        |      |      |
| ATOM | 8074 | O   | GLU | 416 | 29.072 | -93.506 | 47.559 | 1.00 | 0.00 |
| O    |      |     |     |     |        |         |        |      |      |
| ATOM | 8075 | N   | ASN | 417 | 28.283 | -92.250 | 49.267 | 1.00 | 0.00 |
| N    |      |     |     |     |        |         |        |      |      |
| ATOM | 8076 | CA  | ASN | 417 | 28.185 | -90.979 | 48.470 | 1.00 | 0.00 |
| C    |      |     |     |     |        |         |        |      |      |
| ATOM | 8077 | CB  | ASN | 417 | 27.104 | -90.122 | 49.145 | 1.00 | 0.00 |
| C    |      |     |     |     |        |         |        |      |      |
| ATOM | 8078 | CG  | ASN | 417 | 26.507 | -89.075 | 48.208 | 1.00 | 0.00 |
| C    |      |     |     |     |        |         |        |      |      |
| ATOM | 8079 | OD1 | ASN | 417 | 26.745 | -89.030 | 46.976 | 1.00 | 0.00 |
| O    |      |     |     |     |        |         |        |      |      |
| ATOM | 8080 | ND2 | ASN | 417 | 25.768 | -88.135 | 48.735 | 1.00 | 0.00 |
| N    |      |     |     |     |        |         |        |      |      |
| ATOM | 8081 | C   | ASN | 417 | 29.520 | -90.345 | 48.233 | 1.00 | 0.00 |
| C    |      |     |     |     |        |         |        |      |      |
| ATOM | 8082 | O   | ASN | 417 | 30.488 | -90.704 | 48.947 | 1.00 | 0.00 |
| O    |      |     |     |     |        |         |        |      |      |
| ATOM | 8083 | N   | LEU | 418 | 29.587 | -89.414 | 47.248 | 1.00 | 0.00 |
| N    |      |     |     |     |        |         |        |      |      |
| ATOM | 8084 | CA  | LEU | 418 | 30.640 | -88.519 | 46.967 | 1.00 | 0.00 |
| C    |      |     |     |     |        |         |        |      |      |
| ATOM | 8085 | CB  | LEU | 418 | 30.649 | -87.516 | 48.119 | 1.00 | 0.00 |
| C    |      |     |     |     |        |         |        |      |      |
| ATOM | 8086 | CG  | LEU | 418 | 29.339 | -86.834 | 48.485 | 1.00 | 0.00 |
| C    |      |     |     |     |        |         |        |      |      |
| ATOM | 8087 | CD1 | LEU | 418 | 29.645 | -85.826 | 49.532 | 1.00 | 0.00 |
| C    |      |     |     |     |        |         |        |      |      |
| ATOM | 8088 | CD2 | LEU | 418 | 28.537 | -86.215 | 47.366 | 1.00 | 0.00 |
| C    |      |     |     |     |        |         |        |      |      |
| ATOM | 8089 | C   | LEU | 418 | 32.027 | -89.120 | 46.668 | 1.00 | 0.00 |
| C    |      |     |     |     |        |         |        |      |      |
| ATOM | 8090 | O   | LEU | 418 | 33.014 | -88.418 | 46.791 | 1.00 | 0.00 |
| O    |      |     |     |     |        |         |        |      |      |

|      |      |     |     |     |        |         |        |      |      |
|------|------|-----|-----|-----|--------|---------|--------|------|------|
| ATOM | 8091 | N   | LYS | 419 | 32.165 | -90.461 | 46.447 | 1.00 | 0.00 |
| N    |      |     |     |     |        |         |        |      |      |
| ATOM | 8092 | CA  | LYS | 419 | 33.416 | -91.160 | 46.107 | 1.00 | 0.00 |
| C    |      |     |     |     |        |         |        |      |      |
| ATOM | 8093 | CB  | LYS | 419 | 33.308 | -92.677 | 46.379 | 1.00 | 0.00 |
| C    |      |     |     |     |        |         |        |      |      |
| ATOM | 8094 | CG  | LYS | 419 | 32.809 | -93.043 | 47.793 | 1.00 | 0.00 |
| C    |      |     |     |     |        |         |        |      |      |
| ATOM | 8095 | CD  | LYS | 419 | 32.930 | -94.581 | 48.045 | 1.00 | 0.00 |
| C    |      |     |     |     |        |         |        |      |      |
| ATOM | 8096 | CE  | LYS | 419 | 32.134 | -95.006 | 49.304 | 1.00 | 0.00 |
| C    |      |     |     |     |        |         |        |      |      |
| ATOM | 8097 | NZ  | LYS | 419 | 32.249 | -96.444 | 49.627 | 1.00 | 0.00 |
| N1+  |      |     |     |     |        |         |        |      |      |
| ATOM | 8098 | C   | LYS | 419 | 33.958 | -90.825 | 44.682 | 1.00 | 0.00 |
| C    |      |     |     |     |        |         |        |      |      |
| ATOM | 8099 | O   | LYS | 419 | 35.141 | -91.015 | 44.440 | 1.00 | 0.00 |
| O    |      |     |     |     |        |         |        |      |      |
| ATOM | 8100 | N   | ASP | 420 | 33.158 | -90.256 | 43.811 | 1.00 | 0.00 |
| N    |      |     |     |     |        |         |        |      |      |
| ATOM | 8101 | CA  | ASP | 420 | 33.604 | -89.430 | 42.673 | 1.00 | 0.00 |
| C    |      |     |     |     |        |         |        |      |      |
| ATOM | 8102 | CB  | ASP | 420 | 32.466 | -89.266 | 41.622 | 1.00 | 0.00 |
| C    |      |     |     |     |        |         |        |      |      |
| ATOM | 8103 | CG  | ASP | 420 | 32.825 | -88.669 | 40.325 | 1.00 | 0.00 |
| C    |      |     |     |     |        |         |        |      |      |
| ATOM | 8104 | OD1 | ASP | 420 | 31.857 | -88.568 | 39.523 | 1.00 | 0.00 |
| O    |      |     |     |     |        |         |        |      |      |
| ATOM | 8105 | OD2 | ASP | 420 | 34.046 | -88.434 | 40.054 | 1.00 | 0.00 |
| O1-  |      |     |     |     |        |         |        |      |      |
| ATOM | 8106 | C   | ASP | 420 | 34.303 | -88.091 | 42.986 | 1.00 | 0.00 |
| C    |      |     |     |     |        |         |        |      |      |
| ATOM | 8107 | O   | ASP | 420 | 33.874 | -86.972 | 42.652 | 1.00 | 0.00 |
| O    |      |     |     |     |        |         |        |      |      |
| ATOM | 8108 | N   | ASP | 421 | 35.368 | -88.189 | 43.799 | 1.00 | 0.00 |
| N    |      |     |     |     |        |         |        |      |      |
| ATOM | 8109 | CA  | ASP | 421 | 35.991 | -86.997 | 44.428 | 1.00 | 0.00 |
| C    |      |     |     |     |        |         |        |      |      |
| ATOM | 8110 | CB  | ASP | 421 | 36.682 | -87.443 | 45.740 | 1.00 | 0.00 |
| C    |      |     |     |     |        |         |        |      |      |
| ATOM | 8111 | CG  | ASP | 421 | 37.039 | -86.249 | 46.650 | 1.00 | 0.00 |
| C    |      |     |     |     |        |         |        |      |      |
| ATOM | 8112 | OD1 | ASP | 421 | 38.201 | -85.999 | 47.016 | 1.00 | 0.00 |
| O    |      |     |     |     |        |         |        |      |      |
| ATOM | 8113 | OD2 | ASP | 421 | 36.135 | -85.516 | 47.061 | 1.00 | 0.00 |
| O1-  |      |     |     |     |        |         |        |      |      |
| ATOM | 8114 | C   | ASP | 421 | 36.993 | -86.449 | 43.459 | 1.00 | 0.00 |
| C    |      |     |     |     |        |         |        |      |      |
| ATOM | 8115 | O   | ASP | 421 | 37.604 | -87.259 | 42.708 | 1.00 | 0.00 |
| O    |      |     |     |     |        |         |        |      |      |
| ATOM | 8116 | N   | SER | 422 | 37.228 | -85.170 | 43.439 | 1.00 | 0.00 |
| N    |      |     |     |     |        |         |        |      |      |
| ATOM | 8117 | CA  | SER | 422 | 36.366 | -84.110 | 44.090 | 1.00 | 0.00 |
| C    |      |     |     |     |        |         |        |      |      |



|      |      |     |     |     |        |         |        |      |      |
|------|------|-----|-----|-----|--------|---------|--------|------|------|
| ATOM | 8118 | CB  | SER | 422 | 37.154 | -82.822 | 44.137 | 1.00 | 0.00 |
| C    |      |     |     |     |        |         |        |      |      |
| ATOM | 8119 | OG  | SER | 422 | 37.348 | -82.252 | 42.815 | 1.00 | 0.00 |
| O    |      |     |     |     |        |         |        |      |      |
| ATOM | 8120 | C   | SER | 422 | 35.069 | -83.812 | 43.380 | 1.00 | 0.00 |
| C    |      |     |     |     |        |         |        |      |      |
| ATOM | 8121 | O   | SER | 422 | 34.808 | -84.131 | 42.210 | 1.00 | 0.00 |
| O    |      |     |     |     |        |         |        |      |      |
| ATOM | 8122 | N   | LEU | 423 | 34.148 | -83.263 | 44.215 | 1.00 | 0.00 |
| N    |      |     |     |     |        |         |        |      |      |
| ATOM | 8123 | CA  | LEU | 423 | 33.175 | -82.303 | 43.717 | 1.00 | 0.00 |
| C    |      |     |     |     |        |         |        |      |      |
| ATOM | 8124 | CB  | LEU | 423 | 31.926 | -82.325 | 44.663 | 1.00 | 0.00 |
| C    |      |     |     |     |        |         |        |      |      |
| ATOM | 8125 | CG  | LEU | 423 | 31.199 | -83.639 | 44.379 | 1.00 | 0.00 |
| C    |      |     |     |     |        |         |        |      |      |
| ATOM | 8126 | CD1 | LEU | 423 | 31.471 | -84.656 | 45.442 | 1.00 | 0.00 |
| C    |      |     |     |     |        |         |        |      |      |
| ATOM | 8127 | CD2 | LEU | 423 | 29.749 | -83.396 | 44.335 | 1.00 | 0.00 |
| C    |      |     |     |     |        |         |        |      |      |
| ATOM | 8128 | C   | LEU | 423 | 33.738 | -80.883 | 43.442 | 1.00 | 0.00 |
| C    |      |     |     |     |        |         |        |      |      |
| ATOM | 8129 | O   | LEU | 423 | 34.751 | -80.561 | 44.058 | 1.00 | 0.00 |
| O    |      |     |     |     |        |         |        |      |      |
| ATOM | 8130 | N   | PRO | 424 | 33.154 | -80.015 | 42.599 | 1.00 | 0.00 |
| N    |      |     |     |     |        |         |        |      |      |
| ATOM | 8131 | CD  | PRO | 424 | 31.928 | -80.215 | 41.875 | 1.00 | 0.00 |
| C    |      |     |     |     |        |         |        |      |      |
| ATOM | 8132 | CG  | PRO | 424 | 31.951 | -79.308 | 40.615 | 1.00 | 0.00 |
| C    |      |     |     |     |        |         |        |      |      |
| ATOM | 8133 | CB  | PRO | 424 | 32.750 | -78.132 | 41.167 | 1.00 | 0.00 |
| C    |      |     |     |     |        |         |        |      |      |
| ATOM | 8134 | CA  | PRO | 424 | 33.732 | -78.769 | 42.175 | 1.00 | 0.00 |
| C    |      |     |     |     |        |         |        |      |      |
| ATOM | 8135 | C   | PRO | 424 | 34.068 | -77.729 | 43.245 | 1.00 | 0.00 |
| C    |      |     |     |     |        |         |        |      |      |
| ATOM | 8136 | O   | PRO | 424 | 33.311 | -77.501 | 44.223 | 1.00 | 0.00 |
| O    |      |     |     |     |        |         |        |      |      |
| ATOM | 8137 | N   | SER | 425 | 35.162 | -76.948 | 43.064 | 1.00 | 0.00 |
| N    |      |     |     |     |        |         |        |      |      |
| ATOM | 8138 | CA  | SER | 425 | 35.436 | -75.806 | 43.973 | 1.00 | 0.00 |
| C    |      |     |     |     |        |         |        |      |      |
| ATOM | 8139 | CB  | SER | 425 | 36.870 | -75.374 | 43.647 | 1.00 | 0.00 |
| C    |      |     |     |     |        |         |        |      |      |
| ATOM | 8140 | OG  | SER | 425 | 37.230 | -74.413 | 44.637 | 1.00 | 0.00 |
| O    |      |     |     |     |        |         |        |      |      |
| ATOM | 8141 | C   | SER | 425 | 34.477 | -74.636 | 43.845 | 1.00 | 0.00 |
| C    |      |     |     |     |        |         |        |      |      |
| ATOM | 8142 | O   | SER | 425 | 34.102 | -73.965 | 44.809 | 1.00 | 0.00 |
| O    |      |     |     |     |        |         |        |      |      |
| ATOM | 8143 | N   | ASN | 426 | 34.091 | -74.273 | 42.638 | 1.00 | 0.00 |
| N    |      |     |     |     |        |         |        |      |      |
| ATOM | 8144 | CA  | ASN | 426 | 33.060 | -73.230 | 42.317 | 1.00 | 0.00 |
| C    |      |     |     |     |        |         |        |      |      |

|      |      |     |     |     |        |         |        |      |      |
|------|------|-----|-----|-----|--------|---------|--------|------|------|
| ATOM | 8145 | CB  | ASN | 426 | 33.084 | -73.010 | 40.786 | 1.00 | 0.00 |
| C    |      |     |     |     |        |         |        |      |      |
| ATOM | 8146 | CG  | ASN | 426 | 32.127 | -72.012 | 40.244 | 1.00 | 0.00 |
| C    |      |     |     |     |        |         |        |      |      |
| ATOM | 8147 | OD1 | ASN | 426 | 31.114 | -72.381 | 39.646 | 1.00 | 0.00 |
| O    |      |     |     |     |        |         |        |      |      |
| ATOM | 8148 | ND2 | ASN | 426 | 32.484 | -70.762 | 40.326 | 1.00 | 0.00 |
| N    |      |     |     |     |        |         |        |      |      |
| ATOM | 8149 | C   | ASN | 426 | 31.665 | -73.626 | 42.700 | 1.00 | 0.00 |
| C    |      |     |     |     |        |         |        |      |      |
| ATOM | 8150 | O   | ASN | 426 | 31.265 | -74.763 | 42.403 | 1.00 | 0.00 |
| O    |      |     |     |     |        |         |        |      |      |
| ATOM | 8151 | N   | PRO | 427 | 30.897 | -72.673 | 43.275 | 1.00 | 0.00 |
| N    |      |     |     |     |        |         |        |      |      |
| ATOM | 8152 | CD  | PRO | 427 | 31.329 | -71.449 | 43.882 | 1.00 | 0.00 |
| C    |      |     |     |     |        |         |        |      |      |
| ATOM | 8153 | CG  | PRO | 427 | 30.071 | -70.743 | 44.390 | 1.00 | 0.00 |
| C    |      |     |     |     |        |         |        |      |      |
| ATOM | 8154 | CB  | PRO | 427 | 29.199 | -71.925 | 44.737 | 1.00 | 0.00 |
| C    |      |     |     |     |        |         |        |      |      |
| ATOM | 8155 | CA  | PRO | 427 | 29.525 | -73.027 | 43.717 | 1.00 | 0.00 |
| C    |      |     |     |     |        |         |        |      |      |
| ATOM | 8156 | C   | PRO | 427 | 28.438 | -73.199 | 42.615 | 1.00 | 0.00 |
| C    |      |     |     |     |        |         |        |      |      |
| ATOM | 8157 | O   | PRO | 427 | 27.457 | -73.866 | 42.964 | 1.00 | 0.00 |
| O    |      |     |     |     |        |         |        |      |      |
| ATOM | 8158 | N   | ILE | 428 | 28.601 | -72.717 | 41.410 | 1.00 | 0.00 |
| N    |      |     |     |     |        |         |        |      |      |
| ATOM | 8159 | CA  | ILE | 428 | 27.739 | -72.798 | 40.251 | 1.00 | 0.00 |
| C    |      |     |     |     |        |         |        |      |      |
| ATOM | 8160 | CB  | ILE | 428 | 28.120 | -71.671 | 39.191 | 1.00 | 0.00 |
| C    |      |     |     |     |        |         |        |      |      |
| ATOM | 8161 | CG2 | ILE | 428 | 27.037 | -71.821 | 38.098 | 1.00 | 0.00 |
| C    |      |     |     |     |        |         |        |      |      |
| ATOM | 8162 | CG1 | ILE | 428 | 28.227 | -70.288 | 39.856 | 1.00 | 0.00 |
| C    |      |     |     |     |        |         |        |      |      |
| ATOM | 8163 | CD1 | ILE | 428 | 28.790 | -69.156 | 38.959 | 1.00 | 0.00 |
| C    |      |     |     |     |        |         |        |      |      |
| ATOM | 8164 | C   | ILE | 428 | 27.795 | -74.290 | 39.767 | 1.00 | 0.00 |
| C    |      |     |     |     |        |         |        |      |      |
| ATOM | 8165 | O   | ILE | 428 | 26.844 | -75.069 | 39.720 | 1.00 | 0.00 |
| O    |      |     |     |     |        |         |        |      |      |
| ATOM | 8166 | N   | ASP | 429 | 29.001 | -74.697 | 39.333 | 1.00 | 0.00 |
| N    |      |     |     |     |        |         |        |      |      |
| ATOM | 8167 | CA  | ASP | 429 | 29.390 | -76.059 | 38.997 | 1.00 | 0.00 |
| C    |      |     |     |     |        |         |        |      |      |
| ATOM | 8168 | CB  | ASP | 429 | 30.916 | -76.049 | 38.733 | 1.00 | 0.00 |
| C    |      |     |     |     |        |         |        |      |      |
| ATOM | 8169 | CG  | ASP | 429 | 31.352 | -75.219 | 37.481 | 1.00 | 0.00 |
| C    |      |     |     |     |        |         |        |      |      |
| ATOM | 8170 | OD1 | ASP | 429 | 30.469 | -74.798 | 36.701 | 1.00 | 0.00 |
| O    |      |     |     |     |        |         |        |      |      |
| ATOM | 8171 | OD2 | ASP | 429 | 32.571 | -75.155 | 37.232 | 1.00 | 0.00 |
| O1-  |      |     |     |     |        |         |        |      |      |

|      |      |     |     |     |        |         |        |      |      |
|------|------|-----|-----|-----|--------|---------|--------|------|------|
| ATOM | 8172 | C   | ASP | 429 | 29.004 | -77.068 | 40.046 | 1.00 | 0.00 |
| C    |      |     |     |     |        |         |        |      |      |
| ATOM | 8173 | O   | ASP | 429 | 28.490 | -78.105 | 39.748 | 1.00 | 0.00 |
| O    |      |     |     |     |        |         |        |      |      |
| ATOM | 8174 | N   | PHE | 430 | 29.389 | -76.758 | 41.294 | 1.00 | 0.00 |
| N    |      |     |     |     |        |         |        |      |      |
| ATOM | 8175 | CA  | PHE | 430 | 28.943 | -77.551 | 42.432 | 1.00 | 0.00 |
| C    |      |     |     |     |        |         |        |      |      |
| ATOM | 8176 | CB  | PHE | 430 | 29.438 | -77.020 | 43.796 | 1.00 | 0.00 |
| C    |      |     |     |     |        |         |        |      |      |
| ATOM | 8177 | CG  | PHE | 430 | 29.174 | -77.921 | 44.971 | 1.00 | 0.00 |
| C    |      |     |     |     |        |         |        |      |      |
| ATOM | 8178 | CD1 | PHE | 430 | 29.864 | -79.123 | 45.141 | 1.00 | 0.00 |
| C    |      |     |     |     |        |         |        |      |      |
| ATOM | 8179 | CE1 | PHE | 430 | 29.516 | -80.046 | 46.153 | 1.00 | 0.00 |
| C    |      |     |     |     |        |         |        |      |      |
| ATOM | 8180 | CZ  | PHE | 430 | 28.445 | -79.660 | 47.039 | 1.00 | 0.00 |
| C    |      |     |     |     |        |         |        |      |      |
| ATOM | 8181 | CE2 | PHE | 430 | 27.757 | -78.432 | 46.910 | 1.00 | 0.00 |
| C    |      |     |     |     |        |         |        |      |      |
| ATOM | 8182 | CD2 | PHE | 430 | 28.043 | -77.637 | 45.778 | 1.00 | 0.00 |
| C    |      |     |     |     |        |         |        |      |      |
| ATOM | 8183 | C   | PHE | 430 | 27.431 | -77.683 | 42.508 | 1.00 | 0.00 |
| C    |      |     |     |     |        |         |        |      |      |
| ATOM | 8184 | O   | PHE | 430 | 26.947 | -78.849 | 42.590 | 1.00 | 0.00 |
| O    |      |     |     |     |        |         |        |      |      |
| ATOM | 8185 | N   | SER | 431 | 26.659 | -76.583 | 42.525 | 1.00 | 0.00 |
| N    |      |     |     |     |        |         |        |      |      |
| ATOM | 8186 | CA  | SER | 431 | 25.215 | -76.582 | 42.535 | 1.00 | 0.00 |
| C    |      |     |     |     |        |         |        |      |      |
| ATOM | 8187 | CB  | SER | 431 | 24.659 | -75.133 | 42.532 | 1.00 | 0.00 |
| C    |      |     |     |     |        |         |        |      |      |
| ATOM | 8188 | OG  | SER | 431 | 23.300 | -75.125 | 41.922 | 1.00 | 0.00 |
| O    |      |     |     |     |        |         |        |      |      |
| ATOM | 8189 | C   | SER | 431 | 24.612 | -77.425 | 41.378 | 1.00 | 0.00 |
| C    |      |     |     |     |        |         |        |      |      |
| ATOM | 8190 | O   | SER | 431 | 23.778 | -78.334 | 41.661 | 1.00 | 0.00 |
| O    |      |     |     |     |        |         |        |      |      |
| ATOM | 8191 | N   | TYR | 432 | 24.968 | -77.138 | 40.126 | 1.00 | 0.00 |
| N    |      |     |     |     |        |         |        |      |      |
| ATOM | 8192 | CA  | TYR | 432 | 24.540 | -77.966 | 39.000 | 1.00 | 0.00 |
| C    |      |     |     |     |        |         |        |      |      |
| ATOM | 8193 | CB  | TYR | 432 | 24.981 | -77.323 | 37.716 | 1.00 | 0.00 |
| C    |      |     |     |     |        |         |        |      |      |
| ATOM | 8194 | CG  | TYR | 432 | 24.277 | -75.978 | 37.298 | 1.00 | 0.00 |
| C    |      |     |     |     |        |         |        |      |      |
| ATOM | 8195 | CD1 | TYR | 432 | 22.883 | -75.711 | 37.376 | 1.00 | 0.00 |
| C    |      |     |     |     |        |         |        |      |      |
| ATOM | 8196 | CE1 | TYR | 432 | 22.413 | -74.479 | 36.912 | 1.00 | 0.00 |
| C    |      |     |     |     |        |         |        |      |      |
| ATOM | 8197 | CZ  | TYR | 432 | 23.217 | -73.594 | 36.109 | 1.00 | 0.00 |
| C    |      |     |     |     |        |         |        |      |      |
| ATOM | 8198 | OH  | TYR | 432 | 22.740 | -72.371 | 35.737 | 1.00 | 0.00 |
| O    |      |     |     |     |        |         |        |      |      |

|      |      |     |     |     |        |         |        |      |      |
|------|------|-----|-----|-----|--------|---------|--------|------|------|
| ATOM | 8199 | CE2 | TYR | 432 | 24.557 | -73.853 | 36.016 | 1.00 | 0.00 |
| C    |      |     |     |     |        |         |        |      |      |
| ATOM | 8200 | CD2 | TYR | 432 | 25.057 | -75.019 | 36.630 | 1.00 | 0.00 |
| C    |      |     |     |     |        |         |        |      |      |
| ATOM | 8201 | C   | TYR | 432 | 24.911 | -79.489 | 39.044 | 1.00 | 0.00 |
| C    |      |     |     |     |        |         |        |      |      |
| ATOM | 8202 | O   | TYR | 432 | 23.982 | -80.265 | 38.752 | 1.00 | 0.00 |
| O    |      |     |     |     |        |         |        |      |      |
| ATOM | 8203 | N   | ARG | 433 | 26.091 | -79.867 | 39.553 | 1.00 | 0.00 |
| N    |      |     |     |     |        |         |        |      |      |
| ATOM | 8204 | CA  | ARG | 433 | 26.416 | -81.250 | 39.794 | 1.00 | 0.00 |
| C    |      |     |     |     |        |         |        |      |      |
| ATOM | 8205 | CB  | ARG | 433 | 27.873 | -81.488 | 40.281 | 1.00 | 0.00 |
| C    |      |     |     |     |        |         |        |      |      |
| ATOM | 8206 | CG  | ARG | 433 | 28.141 | -82.965 | 40.444 | 1.00 | 0.00 |
| C    |      |     |     |     |        |         |        |      |      |
| ATOM | 8207 | CD  | ARG | 433 | 29.544 | -83.346 | 40.013 | 1.00 | 0.00 |
| C    |      |     |     |     |        |         |        |      |      |
| ATOM | 8208 | NE  | ARG | 433 | 29.982 | -84.585 | 40.707 | 1.00 | 0.00 |
| N    |      |     |     |     |        |         |        |      |      |
| ATOM | 8209 | CZ  | ARG | 433 | 31.244 | -85.021 | 40.815 | 1.00 | 0.00 |
| C    |      |     |     |     |        |         |        |      |      |
| ATOM | 8210 | NH1 | ARG | 433 | 31.455 | -86.097 | 41.484 | 1.00 | 0.00 |
| N    |      |     |     |     |        |         |        |      |      |
| ATOM | 8211 | NH2 | ARG | 433 | 32.262 | -84.297 | 40.325 | 1.00 | 0.00 |
| N1+  |      |     |     |     |        |         |        |      |      |
| ATOM | 8212 | C   | ARG | 433 | 25.539 | -81.934 | 40.859 | 1.00 | 0.00 |
| C    |      |     |     |     |        |         |        |      |      |
| ATOM | 8213 | O   | ARG | 433 | 24.965 | -82.967 | 40.561 | 1.00 | 0.00 |
| O    |      |     |     |     |        |         |        |      |      |
| ATOM | 8214 | N   | VAL | 434 | 25.426 | -81.353 | 42.033 | 1.00 | 0.00 |
| N    |      |     |     |     |        |         |        |      |      |
| ATOM | 8215 | CA  | VAL | 434 | 24.511 | -81.697 | 43.101 | 1.00 | 0.00 |
| C    |      |     |     |     |        |         |        |      |      |
| ATOM | 8216 | CB  | VAL | 434 | 24.807 | -80.850 | 44.307 | 1.00 | 0.00 |
| C    |      |     |     |     |        |         |        |      |      |
| ATOM | 8217 | CG1 | VAL | 434 | 23.631 | -81.102 | 45.308 | 1.00 | 0.00 |
| C    |      |     |     |     |        |         |        |      |      |
| ATOM | 8218 | CG2 | VAL | 434 | 26.107 | -81.264 | 45.056 | 1.00 | 0.00 |
| C    |      |     |     |     |        |         |        |      |      |
| ATOM | 8219 | C   | VAL | 434 | 22.999 | -81.745 | 42.655 | 1.00 | 0.00 |
| C    |      |     |     |     |        |         |        |      |      |
| ATOM | 8220 | O   | VAL | 434 | 22.287 | -82.695 | 42.919 | 1.00 | 0.00 |
| O    |      |     |     |     |        |         |        |      |      |
| ATOM | 8221 | N   | ALA | 435 | 22.573 | -80.799 | 41.830 | 1.00 | 0.00 |
| N    |      |     |     |     |        |         |        |      |      |
| ATOM | 8222 | CA  | ALA | 435 | 21.223 | -80.775 | 41.276 | 1.00 | 0.00 |
| C    |      |     |     |     |        |         |        |      |      |
| ATOM | 8223 | CB  | ALA | 435 | 21.021 | -79.435 | 40.455 | 1.00 | 0.00 |
| C    |      |     |     |     |        |         |        |      |      |
| ATOM | 8224 | C   | ALA | 435 | 20.816 | -82.038 | 40.441 | 1.00 | 0.00 |
| C    |      |     |     |     |        |         |        |      |      |
| ATOM | 8225 | O   | ALA | 435 | 19.685 | -82.608 | 40.523 | 1.00 | 0.00 |
| O    |      |     |     |     |        |         |        |      |      |

|      |      |     |     |     |        |         |        |      |      |
|------|------|-----|-----|-----|--------|---------|--------|------|------|
| ATOM | 8226 | N   | ALA | 436 | 21.766 | -82.573 | 39.658 | 1.00 | 0.00 |
| N    |      |     |     |     |        |         |        |      |      |
| ATOM | 8227 | CA  | ALA | 436 | 21.680 | -83.798 | 38.778 | 1.00 | 0.00 |
| C    |      |     |     |     |        |         |        |      |      |
| ATOM | 8228 | CB  | ALA | 436 | 22.987 | -83.761 | 37.901 | 1.00 | 0.00 |
| C    |      |     |     |     |        |         |        |      |      |
| ATOM | 8229 | C   | ALA | 436 | 21.605 | -85.045 | 39.697 | 1.00 | 0.00 |
| C    |      |     |     |     |        |         |        |      |      |
| ATOM | 8230 | O   | ALA | 436 | 21.332 | -86.168 | 39.175 | 1.00 | 0.00 |
| O    |      |     |     |     |        |         |        |      |      |
| ATOM | 8231 | N   | CYS | 437 | 21.872 | -84.902 | 40.989 | 1.00 | 0.00 |
| N    |      |     |     |     |        |         |        |      |      |
| ATOM | 8232 | CA  | CYS | 437 | 21.721 | -85.991 | 41.964 | 1.00 | 0.00 |
| C    |      |     |     |     |        |         |        |      |      |
| ATOM | 8233 | CB  | CYS | 437 | 23.120 | -86.479 | 42.394 | 1.00 | 0.00 |
| C    |      |     |     |     |        |         |        |      |      |
| ATOM | 8234 | SG  | CYS | 437 | 23.320 | -87.858 | 43.643 | 1.00 | 0.00 |
| S    |      |     |     |     |        |         |        |      |      |
| ATOM | 8235 | C   | CYS | 437 | 20.665 | -85.660 | 43.128 | 1.00 | 0.00 |
| C    |      |     |     |     |        |         |        |      |      |
| ATOM | 8236 | O   | CYS | 437 | 20.680 | -86.279 | 44.176 | 1.00 | 0.00 |
| O    |      |     |     |     |        |         |        |      |      |
| ATOM | 8237 | N   | LEU | 438 | 19.784 | -84.647 | 42.929 | 1.00 | 0.00 |
| N    |      |     |     |     |        |         |        |      |      |
| ATOM | 8238 | CA  | LEU | 438 | 18.801 | -84.190 | 43.937 | 1.00 | 0.00 |
| C    |      |     |     |     |        |         |        |      |      |
| ATOM | 8239 | CB  | LEU | 438 | 18.726 | -82.620 | 43.954 | 1.00 | 0.00 |
| C    |      |     |     |     |        |         |        |      |      |
| ATOM | 8240 | CG  | LEU | 438 | 17.696 | -81.901 | 44.855 | 1.00 | 0.00 |
| C    |      |     |     |     |        |         |        |      |      |
| ATOM | 8241 | CD1 | LEU | 438 | 18.092 | -82.142 | 46.332 | 1.00 | 0.00 |
| C    |      |     |     |     |        |         |        |      |      |
| ATOM | 8242 | CD2 | LEU | 438 | 17.880 | -80.417 | 44.637 | 1.00 | 0.00 |
| C    |      |     |     |     |        |         |        |      |      |
| ATOM | 8243 | C   | LEU | 438 | 17.383 | -84.732 | 43.551 | 1.00 | 0.00 |
| C    |      |     |     |     |        |         |        |      |      |
| ATOM | 8244 | O   | LEU | 438 | 16.940 | -84.557 | 42.442 | 1.00 | 0.00 |
| O    |      |     |     |     |        |         |        |      |      |
| ATOM | 8245 | N   | PRO | 439 | 16.670 | -85.550 | 44.447 | 1.00 | 0.00 |
| N    |      |     |     |     |        |         |        |      |      |
| ATOM | 8246 | CD  | PRO | 439 | 17.323 | -86.069 | 45.645 | 1.00 | 0.00 |
| C    |      |     |     |     |        |         |        |      |      |
| ATOM | 8247 | CG  | PRO | 439 | 16.519 | -87.306 | 45.986 | 1.00 | 0.00 |
| C    |      |     |     |     |        |         |        |      |      |
| ATOM | 8248 | CB  | PRO | 439 | 15.100 | -86.827 | 45.636 | 1.00 | 0.00 |
| C    |      |     |     |     |        |         |        |      |      |
| ATOM | 8249 | CA  | PRO | 439 | 15.276 | -86.055 | 44.312 | 1.00 | 0.00 |
| C    |      |     |     |     |        |         |        |      |      |
| ATOM | 8250 | C   | PRO | 439 | 14.175 | -84.933 | 44.210 | 1.00 | 0.00 |
| C    |      |     |     |     |        |         |        |      |      |
| ATOM | 8251 | O   | PRO | 439 | 13.054 | -85.150 | 44.711 | 1.00 | 0.00 |
| O    |      |     |     |     |        |         |        |      |      |
| ATOM | 8252 | N   | ILE | 440 | 14.423 | -83.804 | 43.472 | 1.00 | 0.00 |
| N    |      |     |     |     |        |         |        |      |      |

|      |      |     |     |     |        |         |        |      |      |
|------|------|-----|-----|-----|--------|---------|--------|------|------|
| ATOM | 8253 | CA  | ILE | 440 | 13.493 | -82.547 | 43.394 | 1.00 | 0.00 |
| C    |      |     |     |     |        |         |        |      |      |
| ATOM | 8254 | CB  | ILE | 440 | 14.301 | -81.483 | 42.689 | 1.00 | 0.00 |
| C    |      |     |     |     |        |         |        |      |      |
| ATOM | 8255 | CG2 | ILE | 440 | 14.453 | -81.691 | 41.157 | 1.00 | 0.00 |
| C    |      |     |     |     |        |         |        |      |      |
| ATOM | 8256 | CG1 | ILE | 440 | 13.651 | -80.078 | 42.960 | 1.00 | 0.00 |
| C    |      |     |     |     |        |         |        |      |      |
| ATOM | 8257 | CD1 | ILE | 440 | 14.235 | -78.786 | 42.384 | 1.00 | 0.00 |
| C    |      |     |     |     |        |         |        |      |      |
| ATOM | 8258 | C   | ILE | 440 | 12.170 | -82.934 | 42.782 | 1.00 | 0.00 |
| C    |      |     |     |     |        |         |        |      |      |
| ATOM | 8259 | O   | ILE | 440 | 12.154 | -83.838 | 41.971 | 1.00 | 0.00 |
| O    |      |     |     |     |        |         |        |      |      |
| ATOM | 8260 | N   | ASP | 441 | 11.069 | -82.183 | 42.967 | 1.00 | 0.00 |
| N    |      |     |     |     |        |         |        |      |      |
| ATOM | 8261 | CA  | ASP | 441 | 10.022 | -82.039 | 41.890 | 1.00 | 0.00 |
| C    |      |     |     |     |        |         |        |      |      |
| ATOM | 8262 | CB  | ASP | 441 | 8.766  | -81.425 | 42.546 | 1.00 | 0.00 |
| C    |      |     |     |     |        |         |        |      |      |
| ATOM | 8263 | CG  | ASP | 441 | 7.469  | -81.534 | 41.779 | 1.00 | 0.00 |
| C    |      |     |     |     |        |         |        |      |      |
| ATOM | 8264 | OD1 | ASP | 441 | 7.456  | -81.853 | 40.571 | 1.00 | 0.00 |
| O    |      |     |     |     |        |         |        |      |      |
| ATOM | 8265 | OD2 | ASP | 441 | 6.434  | -81.325 | 42.382 | 1.00 | 0.00 |
| O1-  |      |     |     |     |        |         |        |      |      |
| ATOM | 8266 | C   | ASP | 441 | 10.424 | -81.075 | 40.732 | 1.00 | 0.00 |
| C    |      |     |     |     |        |         |        |      |      |
| ATOM | 8267 | O   | ASP | 441 | 10.824 | -79.919 | 40.960 | 1.00 | 0.00 |
| O    |      |     |     |     |        |         |        |      |      |
| ATOM | 8268 | N   | ASP | 442 | 10.169 | -81.510 | 39.456 | 1.00 | 0.00 |
| N    |      |     |     |     |        |         |        |      |      |
| ATOM | 8269 | CA  | ASP | 442 | 10.253 | -80.556 | 38.287 | 1.00 | 0.00 |
| C    |      |     |     |     |        |         |        |      |      |
| ATOM | 8270 | CB  | ASP | 442 | 10.001 | -81.256 | 36.942 | 1.00 | 0.00 |
| C    |      |     |     |     |        |         |        |      |      |
| ATOM | 8271 | CG  | ASP | 442 | 11.204 | -82.086 | 36.464 | 1.00 | 0.00 |
| C    |      |     |     |     |        |         |        |      |      |
| ATOM | 8272 | OD1 | ASP | 442 | 11.108 | -82.737 | 35.420 | 1.00 | 0.00 |
| O    |      |     |     |     |        |         |        |      |      |
| ATOM | 8273 | OD2 | ASP | 442 | 12.213 | -82.191 | 37.233 | 1.00 | 0.00 |
| O1-  |      |     |     |     |        |         |        |      |      |
| ATOM | 8274 | C   | ASP | 442 | 9.437  | -79.261 | 38.424 | 1.00 | 0.00 |
| C    |      |     |     |     |        |         |        |      |      |
| ATOM | 8275 | O   | ASP | 442 | 9.837  | -78.216 | 37.946 | 1.00 | 0.00 |
| O    |      |     |     |     |        |         |        |      |      |
| ATOM | 8276 | N   | VAL | 443 | 8.274  | -79.262 | 39.177 | 1.00 | 0.00 |
| N    |      |     |     |     |        |         |        |      |      |
| ATOM | 8277 | CA  | VAL | 443 | 7.486  | -78.001 | 39.490 | 1.00 | 0.00 |
| C    |      |     |     |     |        |         |        |      |      |
| ATOM | 8278 | CB  | VAL | 443 | 6.107  | -78.526 | 40.035 | 1.00 | 0.00 |
| C    |      |     |     |     |        |         |        |      |      |
| ATOM | 8279 | CG1 | VAL | 443 | 5.265  | -77.307 | 40.312 | 1.00 | 0.00 |
| C    |      |     |     |     |        |         |        |      |      |

|      |      |     |     |     |        |         |        |      |      |
|------|------|-----|-----|-----|--------|---------|--------|------|------|
| ATOM | 8280 | CG2 | VAL | 443 | 5.350  | -79.298 | 38.965 | 1.00 | 0.00 |
| C    |      |     |     |     |        |         |        |      |      |
| ATOM | 8281 | C   | VAL | 443 | 8.271  | -77.012 | 40.386 | 1.00 | 0.00 |
| C    |      |     |     |     |        |         |        |      |      |
| ATOM | 8282 | O   | VAL | 443 | 7.999  | -75.793 | 40.315 | 1.00 | 0.00 |
| O    |      |     |     |     |        |         |        |      |      |
| ATOM | 8283 | N   | LEU | 444 | 9.223  | -77.553 | 41.124 | 1.00 | 0.00 |
| N    |      |     |     |     |        |         |        |      |      |
| ATOM | 8284 | CA  | LEU | 444 | 10.218 | -76.732 | 41.734 | 1.00 | 0.00 |
| C    |      |     |     |     |        |         |        |      |      |
| ATOM | 8285 | CB  | LEU | 444 | 10.380 | -77.146 | 43.218 | 1.00 | 0.00 |
| C    |      |     |     |     |        |         |        |      |      |
| ATOM | 8286 | CG  | LEU | 444 | 11.311 | -76.261 | 43.975 | 1.00 | 0.00 |
| C    |      |     |     |     |        |         |        |      |      |
| ATOM | 8287 | CD1 | LEU | 444 | 11.007 | -74.787 | 44.063 | 1.00 | 0.00 |
| C    |      |     |     |     |        |         |        |      |      |
| ATOM | 8288 | CD2 | LEU | 444 | 11.346 | -76.763 | 45.375 | 1.00 | 0.00 |
| C    |      |     |     |     |        |         |        |      |      |
| ATOM | 8289 | C   | LEU | 444 | 11.414 | -76.457 | 40.811 | 1.00 | 0.00 |
| C    |      |     |     |     |        |         |        |      |      |
| ATOM | 8290 | O   | LEU | 444 | 11.780 | -75.297 | 40.779 | 1.00 | 0.00 |
| O    |      |     |     |     |        |         |        |      |      |
| ATOM | 8291 | N   | ARG | 445 | 11.941 | -77.469 | 40.038 | 1.00 | 0.00 |
| N    |      |     |     |     |        |         |        |      |      |
| ATOM | 8292 | CA  | ARG | 445 | 13.216 | -77.354 | 39.241 | 1.00 | 0.00 |
| C    |      |     |     |     |        |         |        |      |      |
| ATOM | 8293 | CB  | ARG | 445 | 13.444 | -78.749 | 38.560 | 1.00 | 0.00 |
| C    |      |     |     |     |        |         |        |      |      |
| ATOM | 8294 | CG  | ARG | 445 | 14.913 | -78.868 | 37.962 | 1.00 | 0.00 |
| C    |      |     |     |     |        |         |        |      |      |
| ATOM | 8295 | CD  | ARG | 445 | 15.124 | -80.259 | 37.366 | 1.00 | 0.00 |
| C    |      |     |     |     |        |         |        |      |      |
| ATOM | 8296 | NE  | ARG | 445 | 16.039 | -81.075 | 38.151 | 1.00 | 0.00 |
| N    |      |     |     |     |        |         |        |      |      |
| ATOM | 8297 | CZ  | ARG | 445 | 16.460 | -82.252 | 37.960 | 1.00 | 0.00 |
| C    |      |     |     |     |        |         |        |      |      |
| ATOM | 8298 | NH1 | ARG | 445 | 16.426 | -82.837 | 36.813 | 1.00 | 0.00 |
| N    |      |     |     |     |        |         |        |      |      |
| ATOM | 8299 | NH2 | ARG | 445 | 16.964 | -82.931 | 38.971 | 1.00 | 0.00 |
| N1+  |      |     |     |     |        |         |        |      |      |
| ATOM | 8300 | C   | ARG | 445 | 13.163 | -76.225 | 38.169 | 1.00 | 0.00 |
| C    |      |     |     |     |        |         |        |      |      |
| ATOM | 8301 | O   | ARG | 445 | 14.207 | -75.569 | 37.945 | 1.00 | 0.00 |
| O    |      |     |     |     |        |         |        |      |      |
| ATOM | 8302 | N   | ILE | 446 | 12.008 | -75.984 | 37.584 | 1.00 | 0.00 |
| N    |      |     |     |     |        |         |        |      |      |
| ATOM | 8303 | CA  | ILE | 446 | 11.740 | -74.839 | 36.710 | 1.00 | 0.00 |
| C    |      |     |     |     |        |         |        |      |      |
| ATOM | 8304 | CB  | ILE | 446 | 10.214 | -74.803 | 36.305 | 1.00 | 0.00 |
| C    |      |     |     |     |        |         |        |      |      |
| ATOM | 8305 | CG2 | ILE | 446 | 9.381  | -74.616 | 37.614 | 1.00 | 0.00 |
| C    |      |     |     |     |        |         |        |      |      |
| ATOM | 8306 | CG1 | ILE | 446 | 9.739  | -73.668 | 35.371 | 1.00 | 0.00 |
| C    |      |     |     |     |        |         |        |      |      |

|      |      |     |     |     |        |         |        |      |      |
|------|------|-----|-----|-----|--------|---------|--------|------|------|
| ATOM | 8307 | CD1 | ILE | 446 | 10.448 | -73.844 | 33.934 | 1.00 | 0.00 |
| C    |      |     |     |     |        |         |        |      |      |
| ATOM | 8308 | C   | ILE | 446 | 12.205 | -73.493 | 37.208 | 1.00 | 0.00 |
| C    |      |     |     |     |        |         |        |      |      |
| ATOM | 8309 | O   | ILE | 446 | 12.785 | -72.706 | 36.509 | 1.00 | 0.00 |
| O    |      |     |     |     |        |         |        |      |      |
| ATOM | 8310 | N   | GLN | 447 | 11.940 | -73.151 | 38.455 | 1.00 | 0.00 |
| N    |      |     |     |     |        |         |        |      |      |
| ATOM | 8311 | CA  | GLN | 447 | 12.180 | -71.857 | 39.089 | 1.00 | 0.00 |
| C    |      |     |     |     |        |         |        |      |      |
| ATOM | 8312 | CB  | GLN | 447 | 11.606 | -71.916 | 40.535 | 1.00 | 0.00 |
| C    |      |     |     |     |        |         |        |      |      |
| ATOM | 8313 | CG  | GLN | 447 | 10.109 | -72.393 | 40.517 | 1.00 | 0.00 |
| C    |      |     |     |     |        |         |        |      |      |
| ATOM | 8314 | CD  | GLN | 447 | 9.517  | -72.621 | 41.903 | 1.00 | 0.00 |
| C    |      |     |     |     |        |         |        |      |      |
| ATOM | 8315 | OE1 | GLN | 447 | 9.782  | -71.881 | 42.861 | 1.00 | 0.00 |
| O    |      |     |     |     |        |         |        |      |      |
| ATOM | 8316 | NE2 | GLN | 447 | 8.668  | -73.613 | 42.112 | 1.00 | 0.00 |
| N    |      |     |     |     |        |         |        |      |      |
| ATOM | 8317 | C   | GLN | 447 | 13.691 | -71.550 | 39.100 | 1.00 | 0.00 |
| C    |      |     |     |     |        |         |        |      |      |
| ATOM | 8318 | O   | GLN | 447 | 14.102 | -70.461 | 38.731 | 1.00 | 0.00 |
| O    |      |     |     |     |        |         |        |      |      |
| ATOM | 8319 | N   | LEU | 448 | 14.484 | -72.570 | 39.544 | 1.00 | 0.00 |
| N    |      |     |     |     |        |         |        |      |      |
| ATOM | 8320 | CA  | LEU | 448 | 15.990 | -72.603 | 39.608 | 1.00 | 0.00 |
| C    |      |     |     |     |        |         |        |      |      |
| ATOM | 8321 | CB  | LEU | 448 | 16.357 | -73.845 | 40.502 | 1.00 | 0.00 |
| C    |      |     |     |     |        |         |        |      |      |
| ATOM | 8322 | CG  | LEU | 448 | 15.613 | -73.969 | 41.873 | 1.00 | 0.00 |
| C    |      |     |     |     |        |         |        |      |      |
| ATOM | 8323 | CD1 | LEU | 448 | 16.052 | -75.197 | 42.720 | 1.00 | 0.00 |
| C    |      |     |     |     |        |         |        |      |      |
| ATOM | 8324 | CD2 | LEU | 448 | 15.756 | -72.697 | 42.756 | 1.00 | 0.00 |
| C    |      |     |     |     |        |         |        |      |      |
| ATOM | 8325 | C   | LEU | 448 | 16.735 | -72.494 | 38.255 | 1.00 | 0.00 |
| C    |      |     |     |     |        |         |        |      |      |
| ATOM | 8326 | O   | LEU | 448 | 17.890 | -71.974 | 38.220 | 1.00 | 0.00 |
| O    |      |     |     |     |        |         |        |      |      |
| ATOM | 8327 | N   | LEU | 449 | 16.053 | -72.830 | 37.147 | 1.00 | 0.00 |
| N    |      |     |     |     |        |         |        |      |      |
| ATOM | 8328 | CA  | LEU | 449 | 16.638 | -72.703 | 35.850 | 1.00 | 0.00 |
| C    |      |     |     |     |        |         |        |      |      |
| ATOM | 8329 | CB  | LEU | 449 | 15.888 | -73.775 | 34.978 | 1.00 | 0.00 |
| C    |      |     |     |     |        |         |        |      |      |
| ATOM | 8330 | CG  | LEU | 449 | 16.284 | -73.911 | 33.501 | 1.00 | 0.00 |
| C    |      |     |     |     |        |         |        |      |      |
| ATOM | 8331 | CD1 | LEU | 449 | 15.960 | -75.290 | 32.875 | 1.00 | 0.00 |
| C    |      |     |     |     |        |         |        |      |      |
| ATOM | 8332 | CD2 | LEU | 449 | 15.596 | -72.887 | 32.593 | 1.00 | 0.00 |
| C    |      |     |     |     |        |         |        |      |      |
| ATOM | 8333 | C   | LEU | 449 | 16.550 | -71.311 | 35.299 | 1.00 | 0.00 |
| C    |      |     |     |     |        |         |        |      |      |



|      |      |     |     |     |        |         |        |      |      |
|------|------|-----|-----|-----|--------|---------|--------|------|------|
| ATOM | 8334 | O   | LEU | 449 | 17.545 | -70.908 | 34.686 | 1.00 | 0.00 |
| O    |      |     |     |     |        |         |        |      |      |
| ATOM | 8335 | N   | LYS | 450 | 15.457 | -70.617 | 35.608 | 1.00 | 0.00 |
| N    |      |     |     |     |        |         |        |      |      |
| ATOM | 8336 | CA  | LYS | 450 | 15.143 | -69.254 | 35.257 | 1.00 | 0.00 |
| C    |      |     |     |     |        |         |        |      |      |
| ATOM | 8337 | CB  | LYS | 450 | 13.634 | -68.999 | 35.575 | 1.00 | 0.00 |
| C    |      |     |     |     |        |         |        |      |      |
| ATOM | 8338 | CG  | LYS | 450 | 12.645 | -69.761 | 34.691 | 1.00 | 0.00 |
| C    |      |     |     |     |        |         |        |      |      |
| ATOM | 8339 | CD  | LYS | 450 | 11.240 | -69.783 | 35.233 | 1.00 | 0.00 |
| C    |      |     |     |     |        |         |        |      |      |
| ATOM | 8340 | CE  | LYS | 450 | 10.536 | -68.397 | 35.152 | 1.00 | 0.00 |
| C    |      |     |     |     |        |         |        |      |      |
| ATOM | 8341 | NZ  | LYS | 450 | 9.480  | -68.327 | 36.205 | 1.00 | 0.00 |
| N1+  |      |     |     |     |        |         |        |      |      |
| ATOM | 8342 | C   | LYS | 450 | 15.978 | -68.214 | 35.944 | 1.00 | 0.00 |
| C    |      |     |     |     |        |         |        |      |      |
| ATOM | 8343 | O   | LYS | 450 | 16.216 | -67.154 | 35.365 | 1.00 | 0.00 |
| O    |      |     |     |     |        |         |        |      |      |
| ATOM | 8344 | N   | ILE | 451 | 16.351 | -68.516 | 37.196 | 1.00 | 0.00 |
| N    |      |     |     |     |        |         |        |      |      |
| ATOM | 8345 | CA  | ILE | 451 | 17.273 | -67.793 | 38.157 | 1.00 | 0.00 |
| C    |      |     |     |     |        |         |        |      |      |
| ATOM | 8346 | CB  | ILE | 451 | 17.189 | -68.555 | 39.479 | 1.00 | 0.00 |
| C    |      |     |     |     |        |         |        |      |      |
| ATOM | 8347 | CG2 | ILE | 451 | 18.423 | -68.525 | 40.374 | 1.00 | 0.00 |
| C    |      |     |     |     |        |         |        |      |      |
| ATOM | 8348 | CG1 | ILE | 451 | 16.025 | -68.091 | 40.312 | 1.00 | 0.00 |
| C    |      |     |     |     |        |         |        |      |      |
| ATOM | 8349 | CD1 | ILE | 451 | 15.525 | -68.999 | 41.416 | 1.00 | 0.00 |
| C    |      |     |     |     |        |         |        |      |      |
| ATOM | 8350 | C   | ILE | 451 | 18.711 | -67.787 | 37.607 | 1.00 | 0.00 |
| C    |      |     |     |     |        |         |        |      |      |
| ATOM | 8351 | O   | ILE | 451 | 19.142 | -68.694 | 36.939 | 1.00 | 0.00 |
| O    |      |     |     |     |        |         |        |      |      |
| ATOM | 8352 | N   | GLY | 452 | 19.449 | -66.683 | 37.739 | 1.00 | 0.00 |
| N    |      |     |     |     |        |         |        |      |      |
| ATOM | 8353 | CA  | GLY | 452 | 20.837 | -66.581 | 37.343 | 1.00 | 0.00 |
| C    |      |     |     |     |        |         |        |      |      |
| ATOM | 8354 | C   | GLY | 452 | 21.836 | -66.603 | 38.487 | 1.00 | 0.00 |
| C    |      |     |     |     |        |         |        |      |      |
| ATOM | 8355 | O   | GLY | 452 | 23.017 | -66.732 | 38.243 | 1.00 | 0.00 |
| O    |      |     |     |     |        |         |        |      |      |
| ATOM | 8356 | N   | SER | 453 | 21.368 | -66.493 | 39.694 | 1.00 | 0.00 |
| N    |      |     |     |     |        |         |        |      |      |
| ATOM | 8357 | CA  | SER | 453 | 22.217 | -66.421 | 40.908 | 1.00 | 0.00 |
| C    |      |     |     |     |        |         |        |      |      |
| ATOM | 8358 | CB  | SER | 453 | 21.800 | -65.338 | 41.869 | 1.00 | 0.00 |
| C    |      |     |     |     |        |         |        |      |      |
| ATOM | 8359 | OG  | SER | 453 | 22.292 | -65.518 | 43.174 | 1.00 | 0.00 |
| O    |      |     |     |     |        |         |        |      |      |
| ATOM | 8360 | C   | SER | 453 | 22.301 | -67.767 | 41.573 | 1.00 | 0.00 |
| C    |      |     |     |     |        |         |        |      |      |

|      |      |     |     |     |        |         |        |      |      |
|------|------|-----|-----|-----|--------|---------|--------|------|------|
| ATOM | 8361 | O   | SER | 453 | 21.206 | -68.294 | 41.958 | 1.00 | 0.00 |
| O    |      |     |     |     |        |         |        |      |      |
| ATOM | 8362 | N   | ALA | 454 | 23.469 | -68.382 | 41.595 | 1.00 | 0.00 |
| N    |      |     |     |     |        |         |        |      |      |
| ATOM | 8363 | CA  | ALA | 454 | 23.732 | -69.640 | 42.371 | 1.00 | 0.00 |
| C    |      |     |     |     |        |         |        |      |      |
| ATOM | 8364 | CB  | ALA | 454 | 25.112 | -70.144 | 42.038 | 1.00 | 0.00 |
| C    |      |     |     |     |        |         |        |      |      |
| ATOM | 8365 | C   | ALA | 454 | 23.499 | -69.479 | 43.883 | 1.00 | 0.00 |
| C    |      |     |     |     |        |         |        |      |      |
| ATOM | 8366 | O   | ALA | 454 | 23.214 | -70.495 | 44.482 | 1.00 | 0.00 |
| O    |      |     |     |     |        |         |        |      |      |
| ATOM | 8367 | N   | ILE | 455 | 23.485 | -68.295 | 44.490 | 1.00 | 0.00 |
| N    |      |     |     |     |        |         |        |      |      |
| ATOM | 8368 | CA  | ILE | 455 | 23.191 | -68.214 | 45.914 | 1.00 | 0.00 |
| C    |      |     |     |     |        |         |        |      |      |
| ATOM | 8369 | CB  | ILE | 455 | 23.420 | -66.758 | 46.510 | 1.00 | 0.00 |
| C    |      |     |     |     |        |         |        |      |      |
| ATOM | 8370 | CG2 | ILE | 455 | 23.152 | -66.626 | 48.012 | 1.00 | 0.00 |
| C    |      |     |     |     |        |         |        |      |      |
| ATOM | 8371 | CG1 | ILE | 455 | 24.854 | -66.262 | 46.236 | 1.00 | 0.00 |
| C    |      |     |     |     |        |         |        |      |      |
| ATOM | 8372 | CD1 | ILE | 455 | 25.985 | -67.245 | 46.531 | 1.00 | 0.00 |
| C    |      |     |     |     |        |         |        |      |      |
| ATOM | 8373 | C   | ILE | 455 | 21.705 | -68.667 | 46.154 | 1.00 | 0.00 |
| C    |      |     |     |     |        |         |        |      |      |
| ATOM | 8374 | O   | ILE | 455 | 21.428 | -69.387 | 47.147 | 1.00 | 0.00 |
| O    |      |     |     |     |        |         |        |      |      |
| ATOM | 8375 | N   | GLN | 456 | 20.799 | -68.209 | 45.251 | 1.00 | 0.00 |
| N    |      |     |     |     |        |         |        |      |      |
| ATOM | 8376 | CA  | GLN | 456 | 19.384 | -68.465 | 45.356 | 1.00 | 0.00 |
| C    |      |     |     |     |        |         |        |      |      |
| ATOM | 8377 | CB  | GLN | 456 | 18.604 | -67.741 | 44.276 | 1.00 | 0.00 |
| C    |      |     |     |     |        |         |        |      |      |
| ATOM | 8378 | CG  | GLN | 456 | 18.455 | -66.233 | 44.653 | 1.00 | 0.00 |
| C    |      |     |     |     |        |         |        |      |      |
| ATOM | 8379 | CD  | GLN | 456 | 17.569 | -65.546 | 43.638 | 1.00 | 0.00 |
| C    |      |     |     |     |        |         |        |      |      |
| ATOM | 8380 | OE1 | GLN | 456 | 16.473 | -65.967 | 43.358 | 1.00 | 0.00 |
| O    |      |     |     |     |        |         |        |      |      |
| ATOM | 8381 | NE2 | GLN | 456 | 17.897 | -64.298 | 43.235 | 1.00 | 0.00 |
| N    |      |     |     |     |        |         |        |      |      |
| ATOM | 8382 | C   | GLN | 456 | 19.222 | -69.971 | 45.139 | 1.00 | 0.00 |
| C    |      |     |     |     |        |         |        |      |      |
| ATOM | 8383 | O   | GLN | 456 | 18.412 | -70.579 | 45.766 | 1.00 | 0.00 |
| O    |      |     |     |     |        |         |        |      |      |
| ATOM | 8384 | N   | ARG | 457 | 19.928 | -70.636 | 44.144 | 1.00 | 0.00 |
| N    |      |     |     |     |        |         |        |      |      |
| ATOM | 8385 | CA  | ARG | 457 | 19.880 | -72.143 | 44.002 | 1.00 | 0.00 |
| C    |      |     |     |     |        |         |        |      |      |
| ATOM | 8386 | CB  | ARG | 457 | 20.765 | -72.582 | 42.746 | 1.00 | 0.00 |
| C    |      |     |     |     |        |         |        |      |      |
| ATOM | 8387 | CG  | ARG | 457 | 20.198 | -72.024 | 41.529 | 1.00 | 0.00 |
| C    |      |     |     |     |        |         |        |      |      |

|      |      |     |     |     |        |         |        |      |      |
|------|------|-----|-----|-----|--------|---------|--------|------|------|
| ATOM | 8388 | CD  | ARG | 457 | 21.021 | -72.481 | 40.398 | 1.00 | 0.00 |
| C    |      |     |     |     |        |         |        |      |      |
| ATOM | 8389 | NE  | ARG | 457 | 20.771 | -71.678 | 39.211 | 1.00 | 0.00 |
| N    |      |     |     |     |        |         |        |      |      |
| ATOM | 8390 | CZ  | ARG | 457 | 21.695 | -71.011 | 38.552 | 1.00 | 0.00 |
| C    |      |     |     |     |        |         |        |      |      |
| ATOM | 8391 | NH1 | ARG | 457 | 22.971 | -71.170 | 38.807 | 1.00 | 0.00 |
| N    |      |     |     |     |        |         |        |      |      |
| ATOM | 8392 | NH2 | ARG | 457 | 21.437 | -70.228 | 37.584 | 1.00 | 0.00 |
| N1+  |      |     |     |     |        |         |        |      |      |
| ATOM | 8393 | C   | ARG | 457 | 20.304 | -72.785 | 45.277 | 1.00 | 0.00 |
| C    |      |     |     |     |        |         |        |      |      |
| ATOM | 8394 | O   | ARG | 457 | 19.456 | -73.428 | 45.906 | 1.00 | 0.00 |
| O    |      |     |     |     |        |         |        |      |      |
| ATOM | 8395 | N   | LEU | 458 | 21.490 | -72.521 | 45.861 | 1.00 | 0.00 |
| N    |      |     |     |     |        |         |        |      |      |
| ATOM | 8396 | CA  | LEU | 458 | 22.043 | -73.289 | 46.997 | 1.00 | 0.00 |
| C    |      |     |     |     |        |         |        |      |      |
| ATOM | 8397 | CB  | LEU | 458 | 23.463 | -72.758 | 47.381 | 1.00 | 0.00 |
| C    |      |     |     |     |        |         |        |      |      |
| ATOM | 8398 | CG  | LEU | 458 | 24.455 | -73.171 | 46.266 | 1.00 | 0.00 |
| C    |      |     |     |     |        |         |        |      |      |
| ATOM | 8399 | CD1 | LEU | 458 | 25.728 | -72.269 | 46.427 | 1.00 | 0.00 |
| C    |      |     |     |     |        |         |        |      |      |
| ATOM | 8400 | CD2 | LEU | 458 | 24.985 | -74.592 | 46.484 | 1.00 | 0.00 |
| C    |      |     |     |     |        |         |        |      |      |
| ATOM | 8401 | C   | LEU | 458 | 21.138 | -73.274 | 48.218 | 1.00 | 0.00 |
| C    |      |     |     |     |        |         |        |      |      |
| ATOM | 8402 | O   | LEU | 458 | 20.986 | -74.257 | 48.909 | 1.00 | 0.00 |
| O    |      |     |     |     |        |         |        |      |      |
| ATOM | 8403 | N   | ARG | 459 | 20.512 | -72.115 | 48.451 | 1.00 | 0.00 |
| N    |      |     |     |     |        |         |        |      |      |
| ATOM | 8404 | CA  | ARG | 459 | 19.422 | -72.005 | 49.488 | 1.00 | 0.00 |
| C    |      |     |     |     |        |         |        |      |      |
| ATOM | 8405 | CB  | ARG | 459 | 18.897 | -70.509 | 49.596 | 1.00 | 0.00 |
| C    |      |     |     |     |        |         |        |      |      |
| ATOM | 8406 | CG  | ARG | 459 | 19.879 | -69.689 | 50.305 | 1.00 | 0.00 |
| C    |      |     |     |     |        |         |        |      |      |
| ATOM | 8407 | CD  | ARG | 459 | 19.604 | -68.189 | 50.286 | 1.00 | 0.00 |
| C    |      |     |     |     |        |         |        |      |      |
| ATOM | 8408 | NE  | ARG | 459 | 18.338 | -67.680 | 50.827 | 1.00 | 0.00 |
| N    |      |     |     |     |        |         |        |      |      |
| ATOM | 8409 | CZ  | ARG | 459 | 18.026 | -67.309 | 52.070 | 1.00 | 0.00 |
| C    |      |     |     |     |        |         |        |      |      |
| ATOM | 8410 | NH1 | ARG | 459 | 16.855 | -66.877 | 52.411 | 1.00 | 0.00 |
| N    |      |     |     |     |        |         |        |      |      |
| ATOM | 8411 | NH2 | ARG | 459 | 18.944 | -67.378 | 52.979 | 1.00 | 0.00 |
| N1+  |      |     |     |     |        |         |        |      |      |
| ATOM | 8412 | C   | ARG | 459 | 18.223 | -72.921 | 49.367 | 1.00 | 0.00 |
| C    |      |     |     |     |        |         |        |      |      |
| ATOM | 8413 | O   | ARG | 459 | 17.880 | -73.504 | 50.337 | 1.00 | 0.00 |
| O    |      |     |     |     |        |         |        |      |      |
| ATOM | 8414 | N   | CYX | 460 | 17.667 | -72.968 | 48.182 | 1.00 | 0.00 |
| N    |      |     |     |     |        |         |        |      |      |

|      |      |     |     |     |        |         |        |      |      |
|------|------|-----|-----|-----|--------|---------|--------|------|------|
| ATOM | 8415 | CA  | CYX | 460 | 16.501 | -73.774 | 47.905 | 1.00 | 0.00 |
| C    |      |     |     |     |        |         |        |      |      |
| ATOM | 8416 | CB  | CYX | 460 | 15.739 | -73.165 | 46.766 | 1.00 | 0.00 |
| C    |      |     |     |     |        |         |        |      |      |
| ATOM | 8417 | SG  | CYX | 460 | 14.068 | -73.825 | 46.350 | 1.00 | 0.00 |
| S    |      |     |     |     |        |         |        |      |      |
| ATOM | 8418 | C   | CYX | 460 | 16.855 | -75.269 | 47.795 | 1.00 | 0.00 |
| C    |      |     |     |     |        |         |        |      |      |
| ATOM | 8419 | O   | CYX | 460 | 16.103 | -76.126 | 48.285 | 1.00 | 0.00 |
| O    |      |     |     |     |        |         |        |      |      |
| ATOM | 8420 | N   | GLU | 461 | 17.980 | -75.509 | 47.145 | 1.00 | 0.00 |
| N    |      |     |     |     |        |         |        |      |      |
| ATOM | 8421 | CA  | GLU | 461 | 18.572 | -76.907 | 47.021 | 1.00 | 0.00 |
| C    |      |     |     |     |        |         |        |      |      |
| ATOM | 8422 | CB  | GLU | 461 | 19.707 | -76.750 | 45.984 | 1.00 | 0.00 |
| C    |      |     |     |     |        |         |        |      |      |
| ATOM | 8423 | CG  | GLU | 461 | 19.183 | -76.453 | 44.564 | 1.00 | 0.00 |
| C    |      |     |     |     |        |         |        |      |      |
| ATOM | 8424 | CD  | GLU | 461 | 20.247 | -76.470 | 43.472 | 1.00 | 0.00 |
| C    |      |     |     |     |        |         |        |      |      |
| ATOM | 8425 | OE1 | GLU | 461 | 21.380 | -76.027 | 43.623 | 1.00 | 0.00 |
| O    |      |     |     |     |        |         |        |      |      |
| ATOM | 8426 | OE2 | GLU | 461 | 19.983 | -76.768 | 42.271 | 1.00 | 0.00 |
| O1-  |      |     |     |     |        |         |        |      |      |
| ATOM | 8427 | C   | GLU | 461 | 18.950 | -77.498 | 48.393 | 1.00 | 0.00 |
| C    |      |     |     |     |        |         |        |      |      |
| ATOM | 8428 | O   | GLU | 461 | 18.755 | -78.687 | 48.614 | 1.00 | 0.00 |
| O    |      |     |     |     |        |         |        |      |      |
| ATOM | 8429 | N   | LEU | 462 | 19.336 | -76.682 | 49.377 | 1.00 | 0.00 |
| N    |      |     |     |     |        |         |        |      |      |
| ATOM | 8430 | CA  | LEU | 462 | 19.371 | -77.176 | 50.800 | 1.00 | 0.00 |
| C    |      |     |     |     |        |         |        |      |      |
| ATOM | 8431 | CB  | LEU | 462 | 19.996 | -76.115 | 51.670 | 1.00 | 0.00 |
| C    |      |     |     |     |        |         |        |      |      |
| ATOM | 8432 | CG  | LEU | 462 | 20.024 | -76.390 | 53.221 | 1.00 | 0.00 |
| C    |      |     |     |     |        |         |        |      |      |
| ATOM | 8433 | CD1 | LEU | 462 | 20.596 | -77.716 | 53.682 | 1.00 | 0.00 |
| C    |      |     |     |     |        |         |        |      |      |
| ATOM | 8434 | CD2 | LEU | 462 | 20.761 | -75.323 | 54.016 | 1.00 | 0.00 |
| C    |      |     |     |     |        |         |        |      |      |
| ATOM | 8435 | C   | LEU | 462 | 17.978 | -77.440 | 51.356 | 1.00 | 0.00 |
| C    |      |     |     |     |        |         |        |      |      |
| ATOM | 8436 | O   | LEU | 462 | 17.790 | -78.462 | 52.041 | 1.00 | 0.00 |
| O    |      |     |     |     |        |         |        |      |      |
| ATOM | 8437 | N   | ASP | 463 | 17.014 | -76.630 | 51.036 | 1.00 | 0.00 |
| N    |      |     |     |     |        |         |        |      |      |
| ATOM | 8438 | CA  | ASP | 463 | 15.645 | -76.842 | 51.520 | 1.00 | 0.00 |
| C    |      |     |     |     |        |         |        |      |      |
| ATOM | 8439 | CB  | ASP | 463 | 14.681 | -75.655 | 51.250 | 1.00 | 0.00 |
| C    |      |     |     |     |        |         |        |      |      |
| ATOM | 8440 | CG  | ASP | 463 | 13.405 | -75.695 | 52.022 | 1.00 | 0.00 |
| C    |      |     |     |     |        |         |        |      |      |
| ATOM | 8441 | OD1 | ASP | 463 | 12.412 | -75.333 | 51.410 | 1.00 | 0.00 |
| O    |      |     |     |     |        |         |        |      |      |

|      |      |     |     |     |        |         |        |      |      |
|------|------|-----|-----|-----|--------|---------|--------|------|------|
| ATOM | 8442 | OD2 | ASP | 463 | 13.348 | -76.193 | 53.184 | 1.00 | 0.00 |
| O1-  |      |     |     |     |        |         |        |      |      |
| ATOM | 8443 | C   | ASP | 463 | 15.211 | -78.261 | 51.041 | 1.00 | 0.00 |
| C    |      |     |     |     |        |         |        |      |      |
| ATOM | 8444 | O   | ASP | 463 | 14.711 | -79.086 | 51.793 | 1.00 | 0.00 |
| O    |      |     |     |     |        |         |        |      |      |
| ATOM | 8445 | N   | ILE | 464 | 15.300 | -78.610 | 49.793 | 1.00 | 0.00 |
| N    |      |     |     |     |        |         |        |      |      |
| ATOM | 8446 | CA  | ILE | 464 | 14.912 | -79.856 | 49.130 | 1.00 | 0.00 |
| C    |      |     |     |     |        |         |        |      |      |
| ATOM | 8447 | CB  | ILE | 464 | 15.187 | -79.683 | 47.619 | 1.00 | 0.00 |
| C    |      |     |     |     |        |         |        |      |      |
| ATOM | 8448 | CG2 | ILE | 464 | 14.813 | -80.990 | 46.914 | 1.00 | 0.00 |
| C    |      |     |     |     |        |         |        |      |      |
| ATOM | 8449 | CG1 | ILE | 464 | 14.330 | -78.544 | 47.062 | 1.00 | 0.00 |
| C    |      |     |     |     |        |         |        |      |      |
| ATOM | 8450 | CD1 | ILE | 464 | 14.821 | -77.985 | 45.721 | 1.00 | 0.00 |
| C    |      |     |     |     |        |         |        |      |      |
| ATOM | 8451 | C   | ILE | 464 | 15.737 | -81.037 | 49.821 | 1.00 | 0.00 |
| C    |      |     |     |     |        |         |        |      |      |
| ATOM | 8452 | O   | ILE | 464 | 15.254 | -82.167 | 49.817 | 1.00 | 0.00 |
| O    |      |     |     |     |        |         |        |      |      |
| ATOM | 8453 | N   | MET | 465 | 17.024 | -80.832 | 50.227 | 1.00 | 0.00 |
| N    |      |     |     |     |        |         |        |      |      |
| ATOM | 8454 | CA  | MET | 465 | 17.685 | -81.792 | 51.036 | 1.00 | 0.00 |
| C    |      |     |     |     |        |         |        |      |      |
| ATOM | 8455 | CB  | MET | 465 | 19.175 | -81.524 | 51.175 | 1.00 | 0.00 |
| C    |      |     |     |     |        |         |        |      |      |
| ATOM | 8456 | CG  | MET | 465 | 19.869 | -81.801 | 49.824 | 1.00 | 0.00 |
| C    |      |     |     |     |        |         |        |      |      |
| ATOM | 8457 | SD  | MET | 465 | 21.579 | -82.408 | 49.707 | 1.00 | 0.00 |
| S    |      |     |     |     |        |         |        |      |      |
| ATOM | 8458 | CE  | MET | 465 | 21.955 | -81.746 | 48.125 | 1.00 | 0.00 |
| C    |      |     |     |     |        |         |        |      |      |
| ATOM | 8459 | C   | MET | 465 | 17.085 | -82.035 | 52.421 | 1.00 | 0.00 |
| C    |      |     |     |     |        |         |        |      |      |
| ATOM | 8460 | O   | MET | 465 | 17.430 | -83.022 | 53.073 | 1.00 | 0.00 |
| O    |      |     |     |     |        |         |        |      |      |
| ATOM | 8461 | N   | ASN | 466 | 16.208 | -81.104 | 52.860 | 1.00 | 0.00 |
| N    |      |     |     |     |        |         |        |      |      |
| ATOM | 8462 | CA  | ASN | 466 | 15.597 | -81.366 | 54.123 | 1.00 | 0.00 |
| C    |      |     |     |     |        |         |        |      |      |
| ATOM | 8463 | CB  | ASN | 466 | 15.208 | -80.057 | 54.927 | 1.00 | 0.00 |
| C    |      |     |     |     |        |         |        |      |      |
| ATOM | 8464 | CG  | ASN | 466 | 16.367 | -79.371 | 55.611 | 1.00 | 0.00 |
| C    |      |     |     |     |        |         |        |      |      |
| ATOM | 8465 | OD1 | ASN | 466 | 16.567 | -79.485 | 56.783 | 1.00 | 0.00 |
| O    |      |     |     |     |        |         |        |      |      |
| ATOM | 8466 | ND2 | ASN | 466 | 17.152 | -78.590 | 54.874 | 1.00 | 0.00 |
| N    |      |     |     |     |        |         |        |      |      |
| ATOM | 8467 | C   | ASN | 466 | 14.304 | -82.103 | 53.792 | 1.00 | 0.00 |
| C    |      |     |     |     |        |         |        |      |      |
| ATOM | 8468 | O   | ASN | 466 | 13.972 | -83.027 | 54.541 | 1.00 | 0.00 |
| O    |      |     |     |     |        |         |        |      |      |

|      |      |     |     |     |        |         |        |      |      |
|------|------|-----|-----|-----|--------|---------|--------|------|------|
| ATOM | 8469 | N   | LYS | 467 | 13.549 | -81.764 | 52.736 | 1.00 | 0.00 |
| N    |      |     |     |     |        |         |        |      |      |
| ATOM | 8470 | CA  | LYS | 467 | 12.328 | -82.410 | 52.306 | 1.00 | 0.00 |
| C    |      |     |     |     |        |         |        |      |      |
| ATOM | 8471 | CB  | LYS | 467 | 11.449 | -81.606 | 51.252 | 1.00 | 0.00 |
| C    |      |     |     |     |        |         |        |      |      |
| ATOM | 8472 | CG  | LYS | 467 | 10.961 | -80.257 | 51.752 | 1.00 | 0.00 |
| C    |      |     |     |     |        |         |        |      |      |
| ATOM | 8473 | CD  | LYS | 467 | 9.746  | -79.670 | 51.078 | 1.00 | 0.00 |
| C    |      |     |     |     |        |         |        |      |      |
| ATOM | 8474 | CE  | LYS | 467 | 9.333  | -78.325 | 51.714 | 1.00 | 0.00 |
| C    |      |     |     |     |        |         |        |      |      |
| ATOM | 8475 | NZ  | LYS | 467 | 10.430 | -77.302 | 51.772 | 1.00 | 0.00 |
| N1+  |      |     |     |     |        |         |        |      |      |
| ATOM | 8476 | C   | LYS | 467 | 12.556 | -83.871 | 51.770 | 1.00 | 0.00 |
| C    |      |     |     |     |        |         |        |      |      |
| ATOM | 8477 | O   | LYS | 467 | 11.724 | -84.778 | 51.919 | 1.00 | 0.00 |
| O    |      |     |     |     |        |         |        |      |      |
| ATOM | 8478 | N   | CYS | 468 | 13.846 | -84.216 | 51.462 | 1.00 | 0.00 |
| N    |      |     |     |     |        |         |        |      |      |
| ATOM | 8479 | CA  | CYS | 468 | 14.266 | -85.571 | 51.110 | 1.00 | 0.00 |
| C    |      |     |     |     |        |         |        |      |      |
| ATOM | 8480 | CB  | CYS | 468 | 15.694 | -85.558 | 50.616 | 1.00 | 0.00 |
| C    |      |     |     |     |        |         |        |      |      |
| ATOM | 8481 | SG  | CYS | 468 | 15.835 | -85.087 | 48.901 | 1.00 | 0.00 |
| S    |      |     |     |     |        |         |        |      |      |
| ATOM | 8482 | C   | CYS | 468 | 14.149 | -86.507 | 52.365 | 1.00 | 0.00 |
| C    |      |     |     |     |        |         |        |      |      |
| ATOM | 8483 | O   | CYS | 468 | 13.928 | -87.670 | 52.185 | 1.00 | 0.00 |
| O    |      |     |     |     |        |         |        |      |      |
| ATOM | 8484 | N   | THR | 469 | 14.124 | -85.984 | 53.622 | 1.00 | 0.00 |
| N    |      |     |     |     |        |         |        |      |      |
| ATOM | 8485 | CA  | THR | 469 | 13.775 | -86.797 | 54.804 | 1.00 | 0.00 |
| C    |      |     |     |     |        |         |        |      |      |
| ATOM | 8486 | CB  | THR | 469 | 13.881 | -85.880 | 56.041 | 1.00 | 0.00 |
| C    |      |     |     |     |        |         |        |      |      |
| ATOM | 8487 | CG2 | THR | 469 | 13.664 | -86.539 | 57.436 | 1.00 | 0.00 |
| C    |      |     |     |     |        |         |        |      |      |
| ATOM | 8488 | OG1 | THR | 469 | 15.167 | -85.400 | 56.006 | 1.00 | 0.00 |
| O    |      |     |     |     |        |         |        |      |      |
| ATOM | 8489 | C   | THR | 469 | 12.279 | -87.334 | 54.753 | 1.00 | 0.00 |
| C    |      |     |     |     |        |         |        |      |      |
| ATOM | 8490 | O   | THR | 469 | 11.942 | -88.266 | 55.480 | 1.00 | 0.00 |
| O    |      |     |     |     |        |         |        |      |      |
| ATOM | 8491 | N   | SER | 470 | 11.377 | -86.799 | 53.854 | 1.00 | 0.00 |
| N    |      |     |     |     |        |         |        |      |      |
| ATOM | 8492 | CA  | SER | 470 | 9.985  | -87.216 | 53.696 | 1.00 | 0.00 |
| C    |      |     |     |     |        |         |        |      |      |
| ATOM | 8493 | CB  | SER | 470 | 8.918  | -86.457 | 54.510 | 1.00 | 0.00 |
| C    |      |     |     |     |        |         |        |      |      |
| ATOM | 8494 | OG  | SER | 470 | 9.411  | -86.156 | 55.851 | 1.00 | 0.00 |
| O    |      |     |     |     |        |         |        |      |      |
| ATOM | 8495 | C   | SER | 470 | 9.615  | -87.230 | 52.194 | 1.00 | 0.00 |
| C    |      |     |     |     |        |         |        |      |      |

|      |      |     |     |     |        |         |        |      |      |
|------|------|-----|-----|-----|--------|---------|--------|------|------|
| ATOM | 8496 | O   | SER | 470 | 8.967  | -86.298 | 51.675 | 1.00 | 0.00 |
| O    |      |     |     |     |        |         |        |      |      |
| ATOM | 8497 | N   | LEU | 471 | 10.086 | -88.221 | 51.421 | 1.00 | 0.00 |
| N    |      |     |     |     |        |         |        |      |      |
| ATOM | 8498 | CA  | LEU | 471 | 9.823  | -88.460 | 50.023 | 1.00 | 0.00 |
| C    |      |     |     |     |        |         |        |      |      |
| ATOM | 8499 | CB  | LEU | 471 | 11.066 | -89.112 | 49.379 | 1.00 | 0.00 |
| C    |      |     |     |     |        |         |        |      |      |
| ATOM | 8500 | CG  | LEU | 471 | 12.150 | -88.067 | 49.224 | 1.00 | 0.00 |
| C    |      |     |     |     |        |         |        |      |      |
| ATOM | 8501 | CD1 | LEU | 471 | 13.574 | -88.688 | 49.109 | 1.00 | 0.00 |
| C    |      |     |     |     |        |         |        |      |      |
| ATOM | 8502 | CD2 | LEU | 471 | 11.871 | -87.222 | 48.024 | 1.00 | 0.00 |
| C    |      |     |     |     |        |         |        |      |      |
| ATOM | 8503 | C   | LEU | 471 | 8.653  | -89.399 | 49.769 | 1.00 | 0.00 |
| C    |      |     |     |     |        |         |        |      |      |
| ATOM | 8504 | O   | LEU | 471 | 8.747  | -90.532 | 50.175 | 1.00 | 0.00 |
| O    |      |     |     |     |        |         |        |      |      |
| ATOM | 8505 | N   | CYS | 472 | 7.591  | -88.905 | 49.127 | 1.00 | 0.00 |
| N    |      |     |     |     |        |         |        |      |      |
| ATOM | 8506 | CA  | CYS | 472 | 6.308  | -89.609 | 49.026 | 1.00 | 0.00 |
| C    |      |     |     |     |        |         |        |      |      |
| ATOM | 8507 | CB  | CYS | 472 | 5.206  | -88.517 | 49.250 | 1.00 | 0.00 |
| C    |      |     |     |     |        |         |        |      |      |
| ATOM | 8508 | SG  | CYS | 472 | 5.190  | -87.921 | 50.950 | 1.00 | 0.00 |
| S    |      |     |     |     |        |         |        |      |      |
| ATOM | 8509 | C   | CYS | 472 | 6.050  | -90.177 | 47.629 | 1.00 | 0.00 |
| C    |      |     |     |     |        |         |        |      |      |
| ATOM | 8510 | O   | CYS | 472 | 6.878  | -90.019 | 46.725 | 1.00 | 0.00 |
| O    |      |     |     |     |        |         |        |      |      |
| ATOM | 8511 | N   | CYM | 473 | 4.844  | -90.754 | 47.496 | 1.00 | 0.00 |
| N    |      |     |     |     |        |         |        |      |      |
| ATOM | 8512 | CA  | CYM | 473 | 4.236  | -90.845 | 46.194 | 1.00 | 0.00 |
| C    |      |     |     |     |        |         |        |      |      |
| ATOM | 8513 | CB  | CYM | 473 | 3.108  | -91.997 | 46.367 | 1.00 | 0.00 |
| C    |      |     |     |     |        |         |        |      |      |
| ATOM | 8514 | SG  | CYM | 473 | 2.056  | -91.987 | 44.955 | 1.00 | 0.00 |
| S    |      |     |     |     |        |         |        |      |      |
| ATOM | 8515 | C   | CYM | 473 | 3.573  | -89.450 | 45.686 | 1.00 | 0.00 |
| C    |      |     |     |     |        |         |        |      |      |
| ATOM | 8516 | O   | CYM | 473 | 2.920  | -88.777 | 46.544 | 1.00 | 0.00 |
| O    |      |     |     |     |        |         |        |      |      |
| ATOM | 8517 | N   | LYS | 474 | 3.717  | -89.101 | 44.406 | 1.00 | 0.00 |
| N    |      |     |     |     |        |         |        |      |      |
| ATOM | 8518 | CA  | LYS | 474 | 3.238  | -87.795 | 43.896 | 1.00 | 0.00 |
| C    |      |     |     |     |        |         |        |      |      |
| ATOM | 8519 | CB  | LYS | 474 | 3.990  | -87.430 | 42.599 | 1.00 | 0.00 |
| C    |      |     |     |     |        |         |        |      |      |
| ATOM | 8520 | CG  | LYS | 474 | 3.753  | -85.970 | 42.129 | 1.00 | 0.00 |
| C    |      |     |     |     |        |         |        |      |      |
| ATOM | 8521 | CD  | LYS | 474 | 4.630  | -85.469 | 40.974 | 1.00 | 0.00 |
| C    |      |     |     |     |        |         |        |      |      |
| ATOM | 8522 | CE  | LYS | 474 | 4.170  | -84.166 | 40.356 | 1.00 | 0.00 |
| C    |      |     |     |     |        |         |        |      |      |

|      |      |     |     |     |        |         |        |      |      |
|------|------|-----|-----|-----|--------|---------|--------|------|------|
| ATOM | 8523 | NZ  | LYS | 474 | 4.239  | -82.930 | 41.129 | 1.00 | 0.00 |
| N1+  |      |     |     |     |        |         |        |      |      |
| ATOM | 8524 | C   | LYS | 474 | 1.733  | -87.638 | 43.815 | 1.00 | 0.00 |
| C    |      |     |     |     |        |         |        |      |      |
| ATOM | 8525 | O   | LYS | 474 | 1.188  | -86.549 | 44.029 | 1.00 | 0.00 |
| O    |      |     |     |     |        |         |        |      |      |
| ATOM | 8526 | N   | GLN | 475 | 1.096  | -88.797 | 43.516 | 1.00 | 0.00 |
| N    |      |     |     |     |        |         |        |      |      |
| ATOM | 8527 | CA  | GLN | 475 | -0.362 | -88.957 | 43.399 | 1.00 | 0.00 |
| C    |      |     |     |     |        |         |        |      |      |
| ATOM | 8528 | CB  | GLN | 475 | -0.631 | -90.324 | 42.815 | 1.00 | 0.00 |
| C    |      |     |     |     |        |         |        |      |      |
| ATOM | 8529 | CG  | GLN | 475 | -2.022 | -90.657 | 42.391 | 1.00 | 0.00 |
| C    |      |     |     |     |        |         |        |      |      |
| ATOM | 8530 | CD  | GLN | 475 | -2.485 | -90.027 | 41.101 | 1.00 | 0.00 |
| C    |      |     |     |     |        |         |        |      |      |
| ATOM | 8531 | OE1 | GLN | 475 | -2.028 | -89.060 | 40.523 | 1.00 | 0.00 |
| O    |      |     |     |     |        |         |        |      |      |
| ATOM | 8532 | NE2 | GLN | 475 | -3.624 | -90.546 | 40.507 | 1.00 | 0.00 |
| N    |      |     |     |     |        |         |        |      |      |
| ATOM | 8533 | C   | GLN | 475 | -1.037 | -88.879 | 44.823 | 1.00 | 0.00 |
| C    |      |     |     |     |        |         |        |      |      |
| ATOM | 8534 | O   | GLN | 475 | -2.044 | -88.223 | 44.935 | 1.00 | 0.00 |
| O    |      |     |     |     |        |         |        |      |      |
| ATOM | 8535 | N   | CYM | 476 | -0.333 | -89.411 | 45.866 | 1.00 | 0.00 |
| N    |      |     |     |     |        |         |        |      |      |
| ATOM | 8536 | CA  | CYM | 476 | -0.815 | -89.449 | 47.230 | 1.00 | 0.00 |
| C    |      |     |     |     |        |         |        |      |      |
| ATOM | 8537 | CB  | CYM | 476 | -0.443 | -90.781 | 47.935 | 1.00 | 0.00 |
| C    |      |     |     |     |        |         |        |      |      |
| ATOM | 8538 | SG  | CYM | 476 | -0.974 | -92.180 | 46.884 | 1.00 | 0.00 |
| S    |      |     |     |     |        |         |        |      |      |
| ATOM | 8539 | C   | CYM | 476 | -0.516 | -88.169 | 48.084 | 1.00 | 0.00 |
| C    |      |     |     |     |        |         |        |      |      |
| ATOM | 8540 | O   | CYM | 476 | -1.406 | -87.631 | 48.649 | 1.00 | 0.00 |
| O    |      |     |     |     |        |         |        |      |      |
| ATOM | 8541 | N   | GLN | 477 | 0.748  | -87.871 | 48.196 | 1.00 | 0.00 |
| N    |      |     |     |     |        |         |        |      |      |
| ATOM | 8542 | CA  | GLN | 477 | 1.350  | -86.895 | 49.143 | 1.00 | 0.00 |
| C    |      |     |     |     |        |         |        |      |      |
| ATOM | 8543 | CB  | GLN | 477 | 0.889  | -85.456 | 48.973 | 1.00 | 0.00 |
| C    |      |     |     |     |        |         |        |      |      |
| ATOM | 8544 | CG  | GLN | 477 | 1.090  | -84.904 | 47.595 | 1.00 | 0.00 |
| C    |      |     |     |     |        |         |        |      |      |
| ATOM | 8545 | CD  | GLN | 477 | -0.177 | -84.592 | 46.874 | 1.00 | 0.00 |
| C    |      |     |     |     |        |         |        |      |      |
| ATOM | 8546 | OE1 | GLN | 477 | -1.149 | -84.081 | 47.442 | 1.00 | 0.00 |
| O    |      |     |     |     |        |         |        |      |      |
| ATOM | 8547 | NE2 | GLN | 477 | -0.334 | -84.785 | 45.570 | 1.00 | 0.00 |
| N    |      |     |     |     |        |         |        |      |      |
| ATOM | 8548 | C   | GLN | 477 | 1.305  | -87.241 | 50.685 | 1.00 | 0.00 |
| C    |      |     |     |     |        |         |        |      |      |
| ATOM | 8549 | O   | GLN | 477 | 1.948  | -86.554 | 51.457 | 1.00 | 0.00 |
| O    |      |     |     |     |        |         |        |      |      |



|      |      |     |     |     |        |         |        |      |      |
|------|------|-----|-----|-----|--------|---------|--------|------|------|
| ATOM | 8550 | N   | GLU | 478 | 0.457  | -88.234 | 51.099 | 1.00 | 0.00 |
| N    |      |     |     |     |        |         |        |      |      |
| ATOM | 8551 | CA  | GLU | 478 | 0.015  | -88.327 | 52.540 | 1.00 | 0.00 |
| C    |      |     |     |     |        |         |        |      |      |
| ATOM | 8552 | CB  | GLU | 478 | -1.496 | -88.712 | 52.514 | 1.00 | 0.00 |
| C    |      |     |     |     |        |         |        |      |      |
| ATOM | 8553 | CG  | GLU | 478 | -1.924 | -90.119 | 51.993 | 1.00 | 0.00 |
| C    |      |     |     |     |        |         |        |      |      |
| ATOM | 8554 | CD  | GLU | 478 | -3.434 | -90.240 | 52.080 | 1.00 | 0.00 |
| C    |      |     |     |     |        |         |        |      |      |
| ATOM | 8555 | OE1 | GLU | 478 | -4.149 | -89.928 | 51.084 | 1.00 | 0.00 |
| O    |      |     |     |     |        |         |        |      |      |
| ATOM | 8556 | OE2 | GLU | 478 | -3.867 | -90.710 | 53.146 | 1.00 | 0.00 |
| O1-  |      |     |     |     |        |         |        |      |      |
| ATOM | 8557 | C   | GLU | 478 | 0.850  | -89.170 | 53.446 | 1.00 | 0.00 |
| C    |      |     |     |     |        |         |        |      |      |
| ATOM | 8558 | O   | GLU | 478 | 0.595  | -89.094 | 54.597 | 1.00 | 0.00 |
| O    |      |     |     |     |        |         |        |      |      |
| ATOM | 8559 | N   | THR | 479 | 1.874  | -89.899 | 52.984 | 1.00 | 0.00 |
| N    |      |     |     |     |        |         |        |      |      |
| ATOM | 8560 | CA  | THR | 479 | 2.852  | -90.685 | 53.812 | 1.00 | 0.00 |
| C    |      |     |     |     |        |         |        |      |      |
| ATOM | 8561 | CB  | THR | 479 | 2.388  | -92.069 | 54.202 | 1.00 | 0.00 |
| C    |      |     |     |     |        |         |        |      |      |
| ATOM | 8562 | CG2 | THR | 479 | 2.610  | -93.271 | 53.178 | 1.00 | 0.00 |
| C    |      |     |     |     |        |         |        |      |      |
| ATOM | 8563 | OG1 | THR | 479 | 3.199  | -92.500 | 55.259 | 1.00 | 0.00 |
| O    |      |     |     |     |        |         |        |      |      |
| ATOM | 8564 | C   | THR | 479 | 4.203  | -90.896 | 53.146 | 1.00 | 0.00 |
| C    |      |     |     |     |        |         |        |      |      |
| ATOM | 8565 | O   | THR | 479 | 4.289  | -90.840 | 51.886 | 1.00 | 0.00 |
| O    |      |     |     |     |        |         |        |      |      |
| ATOM | 8566 | N   | GLU | 480 | 5.278  | -91.030 | 53.939 | 1.00 | 0.00 |
| N    |      |     |     |     |        |         |        |      |      |
| ATOM | 8567 | CA  | GLU | 480 | 6.642  | -91.091 | 53.387 | 1.00 | 0.00 |
| C    |      |     |     |     |        |         |        |      |      |
| ATOM | 8568 | CB  | GLU | 480 | 7.663  | -90.512 | 54.390 | 1.00 | 0.00 |
| C    |      |     |     |     |        |         |        |      |      |
| ATOM | 8569 | CG  | GLU | 480 | 7.980  | -91.275 | 55.697 | 1.00 | 0.00 |
| C    |      |     |     |     |        |         |        |      |      |
| ATOM | 8570 | CD  | GLU | 480 | 6.768  | -91.264 | 56.717 | 1.00 | 0.00 |
| C    |      |     |     |     |        |         |        |      |      |
| ATOM | 8571 | OE1 | GLU | 480 | 6.044  | -90.243 | 56.850 | 1.00 | 0.00 |
| O    |      |     |     |     |        |         |        |      |      |
| ATOM | 8572 | OE2 | GLU | 480 | 6.594  | -92.270 | 57.438 | 1.00 | 0.00 |
| O1-  |      |     |     |     |        |         |        |      |      |
| ATOM | 8573 | C   | GLU | 480 | 7.037  | -92.466 | 52.858 | 1.00 | 0.00 |
| C    |      |     |     |     |        |         |        |      |      |
| ATOM | 8574 | O   | GLU | 480 | 7.047  | -93.458 | 53.535 | 1.00 | 0.00 |
| O    |      |     |     |     |        |         |        |      |      |
| ATOM | 8575 | N   | ILE | 481 | 7.358  | -92.520 | 51.539 | 1.00 | 0.00 |
| N    |      |     |     |     |        |         |        |      |      |
| ATOM | 8576 | CA  | ILE | 481 | 7.845  | -93.677 | 50.757 | 1.00 | 0.00 |
| C    |      |     |     |     |        |         |        |      |      |

|      |      |     |     |     |        |         |        |      |      |
|------|------|-----|-----|-----|--------|---------|--------|------|------|
| ATOM | 8577 | CB  | ILE | 481 | 7.647  | -93.552 | 49.239 | 1.00 | 0.00 |
| C    |      |     |     |     |        |         |        |      |      |
| ATOM | 8578 | CG2 | ILE | 481 | 8.118  | -94.921 | 48.666 | 1.00 | 0.00 |
| C    |      |     |     |     |        |         |        |      |      |
| ATOM | 8579 | CG1 | ILE | 481 | 6.169  | -93.283 | 48.764 | 1.00 | 0.00 |
| C    |      |     |     |     |        |         |        |      |      |
| ATOM | 8580 | CD1 | ILE | 481 | 5.062  | -94.266 | 49.076 | 1.00 | 0.00 |
| C    |      |     |     |     |        |         |        |      |      |
| ATOM | 8581 | C   | ILE | 481 | 9.252  | -94.040 | 51.184 | 1.00 | 0.00 |
| C    |      |     |     |     |        |         |        |      |      |
| ATOM | 8582 | O   | ILE | 481 | 9.560  | -95.166 | 51.541 | 1.00 | 0.00 |
| O    |      |     |     |     |        |         |        |      |      |
| ATOM | 8583 | N   | THR | 482 | 10.194 | -93.070 | 51.257 | 1.00 | 0.00 |
| N    |      |     |     |     |        |         |        |      |      |
| ATOM | 8584 | CA  | THR | 482 | 11.516 | -93.346 | 51.849 | 1.00 | 0.00 |
| C    |      |     |     |     |        |         |        |      |      |
| ATOM | 8585 | CB  | THR | 482 | 12.470 | -93.922 | 50.729 | 1.00 | 0.00 |
| C    |      |     |     |     |        |         |        |      |      |
| ATOM | 8586 | CG2 | THR | 482 | 12.564 | -92.836 | 49.605 | 1.00 | 0.00 |
| C    |      |     |     |     |        |         |        |      |      |
| ATOM | 8587 | OG1 | THR | 482 | 13.720 | -94.238 | 51.198 | 1.00 | 0.00 |
| O    |      |     |     |     |        |         |        |      |      |
| ATOM | 8588 | C   | THR | 482 | 12.047 | -91.991 | 52.460 | 1.00 | 0.00 |
| C    |      |     |     |     |        |         |        |      |      |
| ATOM | 8589 | O   | THR | 482 | 11.334 | -90.950 | 52.458 | 1.00 | 0.00 |
| O    |      |     |     |     |        |         |        |      |      |
| ATOM | 8590 | N   | THR | 483 | 13.253 | -92.115 | 53.022 | 1.00 | 0.00 |
| N    |      |     |     |     |        |         |        |      |      |
| ATOM | 8591 | CA  | THR | 483 | 13.963 | -91.074 | 53.737 | 1.00 | 0.00 |
| C    |      |     |     |     |        |         |        |      |      |
| ATOM | 8592 | CB  | THR | 483 | 13.559 | -91.095 | 55.223 | 1.00 | 0.00 |
| C    |      |     |     |     |        |         |        |      |      |
| ATOM | 8593 | CG2 | THR | 483 | 14.108 | -92.355 | 56.013 | 1.00 | 0.00 |
| C    |      |     |     |     |        |         |        |      |      |
| ATOM | 8594 | OG1 | THR | 483 | 13.908 | -89.854 | 55.861 | 1.00 | 0.00 |
| O    |      |     |     |     |        |         |        |      |      |
| ATOM | 8595 | C   | THR | 483 | 15.449 | -91.133 | 53.603 | 1.00 | 0.00 |
| C    |      |     |     |     |        |         |        |      |      |
| ATOM | 8596 | O   | THR | 483 | 16.023 | -92.129 | 53.307 | 1.00 | 0.00 |
| O    |      |     |     |     |        |         |        |      |      |
| ATOM | 8597 | N   | LYS | 484 | 16.103 | -90.004 | 53.927 | 1.00 | 0.00 |
| N    |      |     |     |     |        |         |        |      |      |
| ATOM | 8598 | CA  | LYS | 484 | 17.531 | -89.785 | 53.629 | 1.00 | 0.00 |
| C    |      |     |     |     |        |         |        |      |      |
| ATOM | 8599 | CB  | LYS | 484 | 17.765 | -88.316 | 54.016 | 1.00 | 0.00 |
| C    |      |     |     |     |        |         |        |      |      |
| ATOM | 8600 | CG  | LYS | 484 | 17.798 | -88.052 | 55.519 | 1.00 | 0.00 |
| C    |      |     |     |     |        |         |        |      |      |
| ATOM | 8601 | CD  | LYS | 484 | 18.181 | -86.605 | 55.809 | 1.00 | 0.00 |
| C    |      |     |     |     |        |         |        |      |      |
| ATOM | 8602 | CE  | LYS | 484 | 17.887 | -86.330 | 57.224 | 1.00 | 0.00 |
| C    |      |     |     |     |        |         |        |      |      |
| ATOM | 8603 | NZ  | LYS | 484 | 18.436 | -85.021 | 57.597 | 1.00 | 0.00 |
| N1+  |      |     |     |     |        |         |        |      |      |

|      |      |     |     |     |        |         |        |      |      |
|------|------|-----|-----|-----|--------|---------|--------|------|------|
| ATOM | 8604 | C   | LYS | 484 | 18.481 | -90.788 | 54.333 | 1.00 | 0.00 |
| C    |      |     |     |     |        |         |        |      |      |
| ATOM | 8605 | O   | LYS | 484 | 19.491 | -91.108 | 53.734 | 1.00 | 0.00 |
| O    |      |     |     |     |        |         |        |      |      |
| ATOM | 8606 | N   | ASN | 485 | 18.091 | -91.374 | 55.482 | 1.00 | 0.00 |
| N    |      |     |     |     |        |         |        |      |      |
| ATOM | 8607 | CA  | ASN | 485 | 18.652 | -92.492 | 56.187 | 1.00 | 0.00 |
| C    |      |     |     |     |        |         |        |      |      |
| ATOM | 8608 | CB  | ASN | 485 | 17.829 | -92.708 | 57.506 | 1.00 | 0.00 |
| C    |      |     |     |     |        |         |        |      |      |
| ATOM | 8609 | CG  | ASN | 485 | 17.880 | -91.347 | 58.252 | 1.00 | 0.00 |
| C    |      |     |     |     |        |         |        |      |      |
| ATOM | 8610 | OD1 | ASN | 485 | 17.153 | -90.418 | 57.987 | 1.00 | 0.00 |
| O    |      |     |     |     |        |         |        |      |      |
| ATOM | 8611 | ND2 | ASN | 485 | 18.738 | -91.315 | 59.212 | 1.00 | 0.00 |
| N    |      |     |     |     |        |         |        |      |      |
| ATOM | 8612 | C   | ASN | 485 | 18.701 | -93.775 | 55.307 | 1.00 | 0.00 |
| C    |      |     |     |     |        |         |        |      |      |
| ATOM | 8613 | O   | ASN | 485 | 19.547 | -94.636 | 55.502 | 1.00 | 0.00 |
| O    |      |     |     |     |        |         |        |      |      |
| ATOM | 8614 | N   | GLU | 486 | 17.903 | -93.947 | 54.238 | 1.00 | 0.00 |
| N    |      |     |     |     |        |         |        |      |      |
| ATOM | 8615 | CA  | GLU | 486 | 17.840 | -95.126 | 53.368 | 1.00 | 0.00 |
| C    |      |     |     |     |        |         |        |      |      |
| ATOM | 8616 | CB  | GLU | 486 | 16.453 | -95.493 | 53.150 | 1.00 | 0.00 |
| C    |      |     |     |     |        |         |        |      |      |
| ATOM | 8617 | CG  | GLU | 486 | 15.713 | -95.663 | 54.469 | 1.00 | 0.00 |
| C    |      |     |     |     |        |         |        |      |      |
| ATOM | 8618 | CD  | GLU | 486 | 16.390 | -96.669 | 55.452 | 1.00 | 0.00 |
| C    |      |     |     |     |        |         |        |      |      |
| ATOM | 8619 | OE1 | GLU | 486 | 16.886 | -97.735 | 54.914 | 1.00 | 0.00 |
| O    |      |     |     |     |        |         |        |      |      |
| ATOM | 8620 | OE2 | GLU | 486 | 16.320 | -96.413 | 56.688 | 1.00 | 0.00 |
| O1-  |      |     |     |     |        |         |        |      |      |
| ATOM | 8621 | C   | GLU | 486 | 18.528 | -95.041 | 52.017 | 1.00 | 0.00 |
| C    |      |     |     |     |        |         |        |      |      |
| ATOM | 8622 | O   | GLU | 486 | 18.681 | -96.039 | 51.271 | 1.00 | 0.00 |
| O    |      |     |     |     |        |         |        |      |      |
| ATOM | 8623 | N   | ILE | 487 | 18.842 | -93.784 | 51.620 | 1.00 | 0.00 |
| N    |      |     |     |     |        |         |        |      |      |
| ATOM | 8624 | CA  | ILE | 487 | 19.484 | -93.422 | 50.370 | 1.00 | 0.00 |
| C    |      |     |     |     |        |         |        |      |      |
| ATOM | 8625 | CB  | ILE | 487 | 19.386 | -91.929 | 50.126 | 1.00 | 0.00 |
| C    |      |     |     |     |        |         |        |      |      |
| ATOM | 8626 | CG2 | ILE | 487 | 19.923 | -91.644 | 48.710 | 1.00 | 0.00 |
| C    |      |     |     |     |        |         |        |      |      |
| ATOM | 8627 | CG1 | ILE | 487 | 17.824 | -91.540 | 50.337 | 1.00 | 0.00 |
| C    |      |     |     |     |        |         |        |      |      |
| ATOM | 8628 | CD1 | ILE | 487 | 17.468 | -90.119 | 49.842 | 1.00 | 0.00 |
| C    |      |     |     |     |        |         |        |      |      |
| ATOM | 8629 | C   | ILE | 487 | 20.920 | -93.921 | 50.287 | 1.00 | 0.00 |
| C    |      |     |     |     |        |         |        |      |      |
| ATOM | 8630 | O   | ILE | 487 | 21.624 | -93.526 | 51.176 | 1.00 | 0.00 |
| O    |      |     |     |     |        |         |        |      |      |

|      |      |     |     |     |        |          |        |      |      |
|------|------|-----|-----|-----|--------|----------|--------|------|------|
| ATOM | 8631 | N   | PHE | 488 | 21.315 | -94.550  | 49.186 | 1.00 | 0.00 |
| N    |      |     |     |     |        |          |        |      |      |
| ATOM | 8632 | CA  | PHE | 488 | 22.680 | -95.044  | 48.954 | 1.00 | 0.00 |
| C    |      |     |     |     |        |          |        |      |      |
| ATOM | 8633 | CB  | PHE | 488 | 22.787 | -96.440  | 49.624 | 1.00 | 0.00 |
| C    |      |     |     |     |        |          |        |      |      |
| ATOM | 8634 | CG  | PHE | 488 | 22.455 | -97.658  | 48.751 | 1.00 | 0.00 |
| C    |      |     |     |     |        |          |        |      |      |
| ATOM | 8635 | CD1 | PHE | 488 | 21.129 | -97.975  | 48.317 | 1.00 | 0.00 |
| C    |      |     |     |     |        |          |        |      |      |
| ATOM | 8636 | CE1 | PHE | 488 | 20.886 | -99.088  | 47.486 | 1.00 | 0.00 |
| C    |      |     |     |     |        |          |        |      |      |
| ATOM | 8637 | CZ  | PHE | 488 | 21.868 | -99.890  | 47.024 | 1.00 | 0.00 |
| C    |      |     |     |     |        |          |        |      |      |
| ATOM | 8638 | CE2 | PHE | 488 | 23.216 | -99.612  | 47.476 | 1.00 | 0.00 |
| C    |      |     |     |     |        |          |        |      |      |
| ATOM | 8639 | CD2 | PHE | 488 | 23.529 | -98.462  | 48.325 | 1.00 | 0.00 |
| C    |      |     |     |     |        |          |        |      |      |
| ATOM | 8640 | C   | PHE | 488 | 23.052 | -94.998  | 47.513 | 1.00 | 0.00 |
| C    |      |     |     |     |        |          |        |      |      |
| ATOM | 8641 | O   | PHE | 488 | 22.209 | -95.004  | 46.607 | 1.00 | 0.00 |
| O    |      |     |     |     |        |          |        |      |      |
| ATOM | 8642 | N   | SER | 489 | 24.332 | -94.959  | 47.289 | 1.00 | 0.00 |
| N    |      |     |     |     |        |          |        |      |      |
| ATOM | 8643 | CA  | SER | 489 | 25.116 | -94.943  | 46.058 | 1.00 | 0.00 |
| C    |      |     |     |     |        |          |        |      |      |
| ATOM | 8644 | CB  | SER | 489 | 26.317 | -93.956  | 46.258 | 1.00 | 0.00 |
| C    |      |     |     |     |        |          |        |      |      |
| ATOM | 8645 | OG  | SER | 489 | 26.039 | -92.758  | 46.944 | 1.00 | 0.00 |
| O    |      |     |     |     |        |          |        |      |      |
| ATOM | 8646 | C   | SER | 489 | 25.575 | -96.348  | 45.603 | 1.00 | 0.00 |
| C    |      |     |     |     |        |          |        |      |      |
| ATOM | 8647 | O   | SER | 489 | 26.675 | -96.739  | 45.826 | 1.00 | 0.00 |
| O    |      |     |     |     |        |          |        |      |      |
| ATOM | 8648 | N   | LEU | 490 | 24.751 | -97.062  | 44.802 | 1.00 | 0.00 |
| N    |      |     |     |     |        |          |        |      |      |
| ATOM | 8649 | CA  | LEU | 490 | 25.239 | -98.250  | 44.000 | 1.00 | 0.00 |
| C    |      |     |     |     |        |          |        |      |      |
| ATOM | 8650 | CB  | LEU | 490 | 24.030 | -99.114  | 43.791 | 1.00 | 0.00 |
| C    |      |     |     |     |        |          |        |      |      |
| ATOM | 8651 | CG  | LEU | 490 | 24.439 | -100.528 | 43.318 | 1.00 | 0.00 |
| C    |      |     |     |     |        |          |        |      |      |
| ATOM | 8652 | CD1 | LEU | 490 | 25.525 | -101.210 | 44.145 | 1.00 | 0.00 |
| C    |      |     |     |     |        |          |        |      |      |
| ATOM | 8653 | CD2 | LEU | 490 | 23.129 | -101.343 | 43.500 | 1.00 | 0.00 |
| C    |      |     |     |     |        |          |        |      |      |
| ATOM | 8654 | C   | LEU | 490 | 25.881 | -97.914  | 42.593 | 1.00 | 0.00 |
| C    |      |     |     |     |        |          |        |      |      |
| ATOM | 8655 | O   | LEU | 490 | 26.431 | -98.734  | 41.949 | 1.00 | 0.00 |
| O    |      |     |     |     |        |          |        |      |      |
| ATOM | 8656 | N   | SER | 491 | 25.750 | -96.614  | 42.155 | 1.00 | 0.00 |
| N    |      |     |     |     |        |          |        |      |      |
| ATOM | 8657 | CA  | SER | 491 | 26.383 | -95.971  | 40.952 | 1.00 | 0.00 |
| C    |      |     |     |     |        |          |        |      |      |

|      |      |     |     |     |        |         |        |      |      |
|------|------|-----|-----|-----|--------|---------|--------|------|------|
| ATOM | 8658 | CB  | SER | 491 | 25.308 | -95.215 | 40.260 | 1.00 | 0.00 |
| C    |      |     |     |     |        |         |        |      |      |
| ATOM | 8659 | OG  | SER | 491 | 25.834 | -94.739 | 39.063 | 1.00 | 0.00 |
| O    |      |     |     |     |        |         |        |      |      |
| ATOM | 8660 | C   | SER | 491 | 27.433 | -94.961 | 41.429 | 1.00 | 0.00 |
| C    |      |     |     |     |        |         |        |      |      |
| ATOM | 8661 | O   | SER | 491 | 27.146 | -94.235 | 42.397 | 1.00 | 0.00 |
| O    |      |     |     |     |        |         |        |      |      |
| ATOM | 8662 | N   | LEU | 492 | 28.616 | -94.903 | 40.824 | 1.00 | 0.00 |
| N    |      |     |     |     |        |         |        |      |      |
| ATOM | 8663 | CA  | LEU | 492 | 29.727 | -94.000 | 41.104 | 1.00 | 0.00 |
| C    |      |     |     |     |        |         |        |      |      |
| ATOM | 8664 | CB  | LEU | 492 | 30.858 | -94.414 | 40.144 | 1.00 | 0.00 |
| C    |      |     |     |     |        |         |        |      |      |
| ATOM | 8665 | CG  | LEU | 492 | 32.119 | -93.502 | 40.118 | 1.00 | 0.00 |
| C    |      |     |     |     |        |         |        |      |      |
| ATOM | 8666 | CD1 | LEU | 492 | 32.963 | -93.579 | 41.414 | 1.00 | 0.00 |
| C    |      |     |     |     |        |         |        |      |      |
| ATOM | 8667 | CD2 | LEU | 492 | 33.033 | -93.790 | 38.941 | 1.00 | 0.00 |
| C    |      |     |     |     |        |         |        |      |      |
| ATOM | 8668 | C   | LEU | 492 | 29.451 | -92.522 | 41.150 | 1.00 | 0.00 |
| C    |      |     |     |     |        |         |        |      |      |
| ATOM | 8669 | O   | LEU | 492 | 30.099 | -91.644 | 41.714 | 1.00 | 0.00 |
| O    |      |     |     |     |        |         |        |      |      |
| ATOM | 8670 | N   | CYS | 493 | 28.296 | -92.126 | 40.589 | 1.00 | 0.00 |
| N    |      |     |     |     |        |         |        |      |      |
| ATOM | 8671 | CA  | CYS | 493 | 27.846 | -90.744 | 40.627 | 1.00 | 0.00 |
| C    |      |     |     |     |        |         |        |      |      |
| ATOM | 8672 | CB  | CYS | 493 | 26.675 | -90.607 | 39.662 | 1.00 | 0.00 |
| C    |      |     |     |     |        |         |        |      |      |
| ATOM | 8673 | SG  | CYS | 493 | 25.269 | -91.769 | 39.801 | 1.00 | 0.00 |
| S    |      |     |     |     |        |         |        |      |      |
| ATOM | 8674 | C   | CYS | 493 | 27.280 | -90.317 | 42.002 | 1.00 | 0.00 |
| C    |      |     |     |     |        |         |        |      |      |
| ATOM | 8675 | O   | CYS | 493 | 27.168 | -89.117 | 42.290 | 1.00 | 0.00 |
| O    |      |     |     |     |        |         |        |      |      |
| ATOM | 8676 | N   | GLY | 494 | 26.736 | -91.260 | 42.784 | 1.00 | 0.00 |
| N    |      |     |     |     |        |         |        |      |      |
| ATOM | 8677 | CA  | GLY | 494 | 25.897 | -91.053 | 43.895 | 1.00 | 0.00 |
| C    |      |     |     |     |        |         |        |      |      |
| ATOM | 8678 | C   | GLY | 494 | 24.574 | -91.715 | 43.816 | 1.00 | 0.00 |
| C    |      |     |     |     |        |         |        |      |      |
| ATOM | 8679 | O   | GLY | 494 | 24.419 | -92.578 | 42.948 | 1.00 | 0.00 |
| O    |      |     |     |     |        |         |        |      |      |
| ATOM | 8680 | N   | PRO | 495 | 23.657 | -91.257 | 44.724 | 1.00 | 0.00 |
| N    |      |     |     |     |        |         |        |      |      |
| ATOM | 8681 | CD  | PRO | 495 | 23.899 | -90.563 | 46.010 | 1.00 | 0.00 |
| C    |      |     |     |     |        |         |        |      |      |
| ATOM | 8682 | CG  | PRO | 495 | 22.844 | -91.202 | 46.937 | 1.00 | 0.00 |
| C    |      |     |     |     |        |         |        |      |      |
| ATOM | 8683 | CB  | PRO | 495 | 21.667 | -91.570 | 45.998 | 1.00 | 0.00 |
| C    |      |     |     |     |        |         |        |      |      |
| ATOM | 8684 | CA  | PRO | 495 | 22.369 | -92.001 | 44.729 | 1.00 | 0.00 |
| C    |      |     |     |     |        |         |        |      |      |

|      |      |     |     |     |        |         |        |      |      |
|------|------|-----|-----|-----|--------|---------|--------|------|------|
| ATOM | 8685 | C   | PRO | 495 | 21.474 | -91.839 | 43.563 | 1.00 | 0.00 |
| C    |      |     |     |     |        |         |        |      |      |
| ATOM | 8686 | O   | PRO | 495 | 20.494 | -92.555 | 43.454 | 1.00 | 0.00 |
| O    |      |     |     |     |        |         |        |      |      |
| ATOM | 8687 | N   | MET | 496 | 21.740 | -90.796 | 42.749 | 1.00 | 0.00 |
| N    |      |     |     |     |        |         |        |      |      |
| ATOM | 8688 | CA  | MET | 496 | 20.791 | -90.465 | 41.676 | 1.00 | 0.00 |
| C    |      |     |     |     |        |         |        |      |      |
| ATOM | 8689 | CB  | MET | 496 | 19.841 | -89.466 | 42.356 | 1.00 | 0.00 |
| C    |      |     |     |     |        |         |        |      |      |
| ATOM | 8690 | CG  | MET | 496 | 18.498 | -89.483 | 41.606 | 1.00 | 0.00 |
| C    |      |     |     |     |        |         |        |      |      |
| ATOM | 8691 | SD  | MET | 496 | 17.575 | -87.951 | 41.888 | 1.00 | 0.00 |
| S    |      |     |     |     |        |         |        |      |      |
| ATOM | 8692 | CE  | MET | 496 | 18.153 | -86.807 | 40.558 | 1.00 | 0.00 |
| C    |      |     |     |     |        |         |        |      |      |
| ATOM | 8693 | C   | MET | 496 | 21.326 | -89.954 | 40.343 | 1.00 | 0.00 |
| C    |      |     |     |     |        |         |        |      |      |
| ATOM | 8694 | O   | MET | 496 | 22.198 | -89.119 | 40.344 | 1.00 | 0.00 |
| O    |      |     |     |     |        |         |        |      |      |
| ATOM | 8695 | N   | ALA | 497 | 20.769 | -90.396 | 39.230 | 1.00 | 0.00 |
| N    |      |     |     |     |        |         |        |      |      |
| ATOM | 8696 | CA  | ALA | 497 | 21.149 | -90.021 | 37.927 | 1.00 | 0.00 |
| C    |      |     |     |     |        |         |        |      |      |
| ATOM | 8697 | CB  | ALA | 497 | 22.330 | -90.881 | 37.480 | 1.00 | 0.00 |
| C    |      |     |     |     |        |         |        |      |      |
| ATOM | 8698 | C   | ALA | 497 | 19.996 | -90.318 | 36.936 | 1.00 | 0.00 |
| C    |      |     |     |     |        |         |        |      |      |
| ATOM | 8699 | O   | ALA | 497 | 18.937 | -90.891 | 37.303 | 1.00 | 0.00 |
| O    |      |     |     |     |        |         |        |      |      |
| ATOM | 8700 | N   | ALA | 498 | 20.049 | -89.876 | 35.707 | 1.00 | 0.00 |
| N    |      |     |     |     |        |         |        |      |      |
| ATOM | 8701 | CA  | ALA | 498 | 19.061 | -90.213 | 34.638 | 1.00 | 0.00 |
| C    |      |     |     |     |        |         |        |      |      |
| ATOM | 8702 | CB  | ALA | 498 | 19.158 | -89.218 | 33.436 | 1.00 | 0.00 |
| C    |      |     |     |     |        |         |        |      |      |
| ATOM | 8703 | C   | ALA | 498 | 19.283 | -91.665 | 34.232 | 1.00 | 0.00 |
| C    |      |     |     |     |        |         |        |      |      |
| ATOM | 8704 | O   | ALA | 498 | 20.449 | -92.158 | 34.140 | 1.00 | 0.00 |
| O    |      |     |     |     |        |         |        |      |      |
| ATOM | 8705 | N   | TYR | 499 | 18.207 | -92.363 | 33.924 | 1.00 | 0.00 |
| N    |      |     |     |     |        |         |        |      |      |
| ATOM | 8706 | CA  | TYR | 499 | 18.201 | -93.782 | 33.406 | 1.00 | 0.00 |
| C    |      |     |     |     |        |         |        |      |      |
| ATOM | 8707 | CB  | TYR | 499 | 17.988 | -94.745 | 34.622 | 1.00 | 0.00 |
| C    |      |     |     |     |        |         |        |      |      |
| ATOM | 8708 | CG  | TYR | 499 | 19.148 | -94.963 | 35.624 | 1.00 | 0.00 |
| C    |      |     |     |     |        |         |        |      |      |
| ATOM | 8709 | CD1 | TYR | 499 | 19.963 | -96.108 | 35.633 | 1.00 | 0.00 |
| C    |      |     |     |     |        |         |        |      |      |
| ATOM | 8710 | CE1 | TYR | 499 | 20.878 | -96.286 | 36.650 | 1.00 | 0.00 |
| C    |      |     |     |     |        |         |        |      |      |
| ATOM | 8711 | CZ  | TYR | 499 | 20.981 | -95.354 | 37.700 | 1.00 | 0.00 |
| C    |      |     |     |     |        |         |        |      |      |

|      |      |     |     |     |        |          |        |      |      |
|------|------|-----|-----|-----|--------|----------|--------|------|------|
| ATOM | 8712 | OH  | TYR | 499 | 21.858 | -95.637  | 38.743 | 1.00 | 0.00 |
| O    |      |     |     |     |        |          |        |      |      |
| ATOM | 8713 | CE2 | TYR | 499 | 20.198 | -94.195  | 37.724 | 1.00 | 0.00 |
| C    |      |     |     |     |        |          |        |      |      |
| ATOM | 8714 | CD2 | TYR | 499 | 19.261 | -94.041  | 36.713 | 1.00 | 0.00 |
| C    |      |     |     |     |        |          |        |      |      |
| ATOM | 8715 | C   | TYR | 499 | 17.087 | -94.085  | 32.378 | 1.00 | 0.00 |
| C    |      |     |     |     |        |          |        |      |      |
| ATOM | 8716 | O   | TYR | 499 | 16.023 | -93.600  | 32.527 | 1.00 | 0.00 |
| O    |      |     |     |     |        |          |        |      |      |
| ATOM | 8717 | N   | VAL | 500 | 17.343 | -94.967  | 31.409 | 1.00 | 0.00 |
| N    |      |     |     |     |        |          |        |      |      |
| ATOM | 8718 | CA  | VAL | 500 | 16.432 | -95.134  | 30.233 | 1.00 | 0.00 |
| C    |      |     |     |     |        |          |        |      |      |
| ATOM | 8719 | CB  | VAL | 500 | 17.073 | -94.739  | 28.867 | 1.00 | 0.00 |
| C    |      |     |     |     |        |          |        |      |      |
| ATOM | 8720 | CG1 | VAL | 500 | 18.182 | -95.701  | 28.459 | 1.00 | 0.00 |
| C    |      |     |     |     |        |          |        |      |      |
| ATOM | 8721 | CG2 | VAL | 500 | 16.049 | -94.439  | 27.804 | 1.00 | 0.00 |
| C    |      |     |     |     |        |          |        |      |      |
| ATOM | 8722 | C   | VAL | 500 | 15.965 | -96.641  | 30.044 | 1.00 | 0.00 |
| C    |      |     |     |     |        |          |        |      |      |
| ATOM | 8723 | O   | VAL | 500 | 16.683 | -97.503  | 30.522 | 1.00 | 0.00 |
| O    |      |     |     |     |        |          |        |      |      |
| ATOM | 8724 | N   | ASN | 501 | 14.760 | -96.893  | 29.589 | 1.00 | 0.00 |
| N    |      |     |     |     |        |          |        |      |      |
| ATOM | 8725 | CA  | ASN | 501 | 14.272 | -98.208  | 29.407 | 1.00 | 0.00 |
| C    |      |     |     |     |        |          |        |      |      |
| ATOM | 8726 | CB  | ASN | 501 | 12.916 | -98.234  | 30.191 | 1.00 | 0.00 |
| C    |      |     |     |     |        |          |        |      |      |
| ATOM | 8727 | CG  | ASN | 501 | 11.638 | -98.157  | 29.366 | 1.00 | 0.00 |
| C    |      |     |     |     |        |          |        |      |      |
| ATOM | 8728 | OD1 | ASN | 501 | 11.582 | -97.532  | 28.340 | 1.00 | 0.00 |
| O    |      |     |     |     |        |          |        |      |      |
| ATOM | 8729 | ND2 | ASN | 501 | 10.668 | -98.867  | 29.785 | 1.00 | 0.00 |
| N    |      |     |     |     |        |          |        |      |      |
| ATOM | 8730 | C   | ASN | 501 | 14.283 | -98.524  | 27.894 | 1.00 | 0.00 |
| C    |      |     |     |     |        |          |        |      |      |
| ATOM | 8731 | O   | ASN | 501 | 14.493 | -97.623  | 27.133 | 1.00 | 0.00 |
| O    |      |     |     |     |        |          |        |      |      |
| ATOM | 8732 | N   | PRO | 502 | 14.019 | -99.770  | 27.391 | 1.00 | 0.00 |
| N    |      |     |     |     |        |          |        |      |      |
| ATOM | 8733 | CD  | PRO | 502 | 13.729 | -100.896 | 28.252 | 1.00 | 0.00 |
| C    |      |     |     |     |        |          |        |      |      |
| ATOM | 8734 | CG  | PRO | 502 | 14.131 | -102.075 | 27.383 | 1.00 | 0.00 |
| C    |      |     |     |     |        |          |        |      |      |
| ATOM | 8735 | CB  | PRO | 502 | 13.692 | -101.551 | 26.030 | 1.00 | 0.00 |
| C    |      |     |     |     |        |          |        |      |      |
| ATOM | 8736 | CA  | PRO | 502 | 14.145 | -100.142 | 26.000 | 1.00 | 0.00 |
| C    |      |     |     |     |        |          |        |      |      |
| ATOM | 8737 | C   | PRO | 502 | 13.246 | -99.342  | 25.008 | 1.00 | 0.00 |
| C    |      |     |     |     |        |          |        |      |      |
| ATOM | 8738 | O   | PRO | 502 | 13.597 | -99.254  | 23.851 | 1.00 | 0.00 |
| O    |      |     |     |     |        |          |        |      |      |

|      |      |     |     |     |        |          |        |      |      |
|------|------|-----|-----|-----|--------|----------|--------|------|------|
| ATOM | 8739 | N   | HIE | 503 | 12.155 | -98.822  | 25.493 | 1.00 | 0.00 |
| N    |      |     |     |     |        |          |        |      |      |
| ATOM | 8740 | CA  | HIE | 503 | 11.285 | -97.922  | 24.680 | 1.00 | 0.00 |
| C    |      |     |     |     |        |          |        |      |      |
| ATOM | 8741 | CB  | HIE | 503 | 9.843  | -98.267  | 24.887 | 1.00 | 0.00 |
| C    |      |     |     |     |        |          |        |      |      |
| ATOM | 8742 | CG  | HIE | 503 | 9.543  | -99.677  | 24.394 | 1.00 | 0.00 |
| C    |      |     |     |     |        |          |        |      |      |
| ATOM | 8743 | ND1 | HIE | 503 | 9.290  | -100.062 | 23.101 | 1.00 | 0.00 |
| N    |      |     |     |     |        |          |        |      |      |
| ATOM | 8744 | CE1 | HIE | 503 | 9.469  | -101.402 | 23.074 | 1.00 | 0.00 |
| C    |      |     |     |     |        |          |        |      |      |
| ATOM | 8745 | NE2 | HIE | 503 | 9.726  | -101.865 | 24.337 | 1.00 | 0.00 |
| N    |      |     |     |     |        |          |        |      |      |
| ATOM | 8746 | CD2 | HIE | 503 | 9.773  | -100.753 | 25.171 | 1.00 | 0.00 |
| C    |      |     |     |     |        |          |        |      |      |
| ATOM | 8747 | C   | HIE | 503 | 11.478 | -96.385  | 24.786 | 1.00 | 0.00 |
| C    |      |     |     |     |        |          |        |      |      |
| ATOM | 8748 | O   | HIE | 503 | 10.698 | -95.589  | 24.279 | 1.00 | 0.00 |
| O    |      |     |     |     |        |          |        |      |      |
| ATOM | 8749 | N   | GLY | 504 | 12.535 | -95.979  | 25.423 | 1.00 | 0.00 |
| N    |      |     |     |     |        |          |        |      |      |
| ATOM | 8750 | CA  | GLY | 504 | 13.167 | -94.656  | 25.329 | 1.00 | 0.00 |
| C    |      |     |     |     |        |          |        |      |      |
| ATOM | 8751 | C   | GLY | 504 | 12.592 | -93.674  | 26.369 | 1.00 | 0.00 |
| C    |      |     |     |     |        |          |        |      |      |
| ATOM | 8752 | O   | GLY | 504 | 13.115 | -92.581  | 26.430 | 1.00 | 0.00 |
| O    |      |     |     |     |        |          |        |      |      |
| ATOM | 8753 | N   | TYR | 505 | 11.609 | -94.093  | 27.142 | 1.00 | 0.00 |
| N    |      |     |     |     |        |          |        |      |      |
| ATOM | 8754 | CA  | TYR | 505 | 11.240 | -93.362  | 28.412 | 1.00 | 0.00 |
| C    |      |     |     |     |        |          |        |      |      |
| ATOM | 8755 | CB  | TYR | 505 | 10.127 | -94.147  | 29.076 | 1.00 | 0.00 |
| C    |      |     |     |     |        |          |        |      |      |
| ATOM | 8756 | CG  | TYR | 505 | 8.891  | -94.326  | 28.186 | 1.00 | 0.00 |
| C    |      |     |     |     |        |          |        |      |      |
| ATOM | 8757 | CD1 | TYR | 505 | 8.744  | -95.458  | 27.427 | 1.00 | 0.00 |
| C    |      |     |     |     |        |          |        |      |      |
| ATOM | 8758 | CE1 | TYR | 505 | 7.697  | -95.522  | 26.497 | 1.00 | 0.00 |
| C    |      |     |     |     |        |          |        |      |      |
| ATOM | 8759 | CZ  | TYR | 505 | 6.768  | -94.435  | 26.335 | 1.00 | 0.00 |
| C    |      |     |     |     |        |          |        |      |      |
| ATOM | 8760 | OH  | TYR | 505 | 5.620  | -94.446  | 25.511 | 1.00 | 0.00 |
| O    |      |     |     |     |        |          |        |      |      |
| ATOM | 8761 | CE2 | TYR | 505 | 6.936  | -93.312  | 27.134 | 1.00 | 0.00 |
| C    |      |     |     |     |        |          |        |      |      |
| ATOM | 8762 | CD2 | TYR | 505 | 8.011  | -93.256  | 28.062 | 1.00 | 0.00 |
| C    |      |     |     |     |        |          |        |      |      |
| ATOM | 8763 | C   | TYR | 505 | 12.433 | -93.214  | 29.424 | 1.00 | 0.00 |
| C    |      |     |     |     |        |          |        |      |      |
| ATOM | 8764 | O   | TYR | 505 | 12.962 | -94.233  | 29.814 | 1.00 | 0.00 |
| O    |      |     |     |     |        |          |        |      |      |
| ATOM | 8765 | N   | VAL | 506 | 12.807 | -92.035  | 29.716 | 1.00 | 0.00 |
| N    |      |     |     |     |        |          |        |      |      |



|      |      |     |     |     |        |         |        |      |      |
|------|------|-----|-----|-----|--------|---------|--------|------|------|
| ATOM | 8766 | CA  | VAL | 506 | 13.819 | -91.635 | 30.720 | 1.00 | 0.00 |
| C    |      |     |     |     |        |         |        |      |      |
| ATOM | 8767 | CB  | VAL | 506 | 14.957 | -90.952 | 29.980 | 1.00 | 0.00 |
| C    |      |     |     |     |        |         |        |      |      |
| ATOM | 8768 | CG1 | VAL | 506 | 14.722 | -89.568 | 29.223 | 1.00 | 0.00 |
| C    |      |     |     |     |        |         |        |      |      |
| ATOM | 8769 | CG2 | VAL | 506 | 16.153 | -90.626 | 30.886 | 1.00 | 0.00 |
| C    |      |     |     |     |        |         |        |      |      |
| ATOM | 8770 | C   | VAL | 506 | 13.288 | -90.766 | 31.825 | 1.00 | 0.00 |
| C    |      |     |     |     |        |         |        |      |      |
| ATOM | 8771 | O   | VAL | 506 | 12.350 | -90.056 | 31.573 | 1.00 | 0.00 |
| O    |      |     |     |     |        |         |        |      |      |
| ATOM | 8772 | N   | HIP | 507 | 13.820 | -90.911 | 33.005 | 1.00 | 0.00 |
| N    |      |     |     |     |        |         |        |      |      |
| ATOM | 8773 | CA  | HIP | 507 | 13.678 | -90.056 | 34.182 | 1.00 | 0.00 |
| C    |      |     |     |     |        |         |        |      |      |
| ATOM | 8774 | CB  | HIP | 507 | 12.494 | -90.640 | 34.900 | 1.00 | 0.00 |
| C    |      |     |     |     |        |         |        |      |      |
| ATOM | 8775 | CG  | HIP | 507 | 11.304 | -91.089 | 34.179 | 1.00 | 0.00 |
| C    |      |     |     |     |        |         |        |      |      |
| ATOM | 8776 | ND1 | HIP | 507 | 10.302 | -90.287 | 33.625 | 1.00 | 0.00 |
| N1+  |      |     |     |     |        |         |        |      |      |
| ATOM | 8777 | CE1 | HIP | 507 | 9.276  | -91.061 | 33.239 | 1.00 | 0.00 |
| C    |      |     |     |     |        |         |        |      |      |
| ATOM | 8778 | NE2 | HIP | 507 | 9.570  | -92.283 | 33.583 | 1.00 | 0.00 |
| N    |      |     |     |     |        |         |        |      |      |
| ATOM | 8779 | CD2 | HIP | 507 | 10.826 | -92.340 | 34.091 | 1.00 | 0.00 |
| C    |      |     |     |     |        |         |        |      |      |
| ATOM | 8780 | C   | HIP | 507 | 14.944 | -90.175 | 35.003 | 1.00 | 0.00 |
| C    |      |     |     |     |        |         |        |      |      |
| ATOM | 8781 | O   | HIP | 507 | 15.825 | -90.989 | 34.708 | 1.00 | 0.00 |
| O    |      |     |     |     |        |         |        |      |      |
| ATOM | 8782 | N   | GLU | 508 | 15.020 | -89.520 | 36.091 | 1.00 | 0.00 |
| N    |      |     |     |     |        |         |        |      |      |
| ATOM | 8783 | CA  | GLU | 508 | 15.950 | -89.949 | 37.157 | 1.00 | 0.00 |
| C    |      |     |     |     |        |         |        |      |      |
| ATOM | 8784 | CB  | GLU | 508 | 16.550 | -88.739 | 37.811 | 1.00 | 0.00 |
| C    |      |     |     |     |        |         |        |      |      |
| ATOM | 8785 | CG  | GLU | 508 | 17.444 | -87.831 | 36.915 | 1.00 | 0.00 |
| C    |      |     |     |     |        |         |        |      |      |
| ATOM | 8786 | CD  | GLU | 508 | 16.750 | -86.413 | 36.841 | 1.00 | 0.00 |
| C    |      |     |     |     |        |         |        |      |      |
| ATOM | 8787 | OE1 | GLU | 508 | 17.243 | -85.382 | 37.244 | 1.00 | 0.00 |
| O    |      |     |     |     |        |         |        |      |      |
| ATOM | 8788 | OE2 | GLU | 508 | 15.509 | -86.455 | 36.571 | 1.00 | 0.00 |
| O1-  |      |     |     |     |        |         |        |      |      |
| ATOM | 8789 | C   | GLU | 508 | 15.408 | -91.070 | 38.084 | 1.00 | 0.00 |
| C    |      |     |     |     |        |         |        |      |      |
| ATOM | 8790 | O   | GLU | 508 | 14.311 | -90.954 | 38.588 | 1.00 | 0.00 |
| O    |      |     |     |     |        |         |        |      |      |
| ATOM | 8791 | N   | THR | 509 | 16.286 | -92.101 | 38.229 | 1.00 | 0.00 |
| N    |      |     |     |     |        |         |        |      |      |
| ATOM | 8792 | CA  | THR | 509 | 16.103 | -93.096 | 39.358 | 1.00 | 0.00 |
| C    |      |     |     |     |        |         |        |      |      |

|      |      |     |     |     |        |         |        |      |      |
|------|------|-----|-----|-----|--------|---------|--------|------|------|
| ATOM | 8793 | CB  | THR | 509 | 16.595 | -94.451 | 38.897 | 1.00 | 0.00 |
| C    |      |     |     |     |        |         |        |      |      |
| ATOM | 8794 | CG2 | THR | 509 | 16.483 | -95.650 | 39.796 | 1.00 | 0.00 |
| C    |      |     |     |     |        |         |        |      |      |
| ATOM | 8795 | OG1 | THR | 509 | 16.005 | -94.821 | 37.729 | 1.00 | 0.00 |
| O    |      |     |     |     |        |         |        |      |      |
| ATOM | 8796 | C   | THR | 509 | 16.971 | -92.844 | 40.600 | 1.00 | 0.00 |
| C    |      |     |     |     |        |         |        |      |      |
| ATOM | 8797 | O   | THR | 509 | 18.147 | -92.474 | 40.478 | 1.00 | 0.00 |
| O    |      |     |     |     |        |         |        |      |      |
| ATOM | 8798 | N   | LEU | 510 | 16.456 | -93.059 | 41.809 | 1.00 | 0.00 |
| N    |      |     |     |     |        |         |        |      |      |
| ATOM | 8799 | CA  | LEU | 510 | 17.123 | -92.965 | 43.153 | 1.00 | 0.00 |
| C    |      |     |     |     |        |         |        |      |      |
| ATOM | 8800 | CB  | LEU | 510 | 16.198 | -92.125 | 44.028 | 1.00 | 0.00 |
| C    |      |     |     |     |        |         |        |      |      |
| ATOM | 8801 | CG  | LEU | 510 | 16.762 | -91.879 | 45.445 | 1.00 | 0.00 |
| C    |      |     |     |     |        |         |        |      |      |
| ATOM | 8802 | CD1 | LEU | 510 | 17.981 | -91.015 | 45.336 | 1.00 | 0.00 |
| C    |      |     |     |     |        |         |        |      |      |
| ATOM | 8803 | CD2 | LEU | 510 | 15.778 | -91.192 | 46.370 | 1.00 | 0.00 |
| C    |      |     |     |     |        |         |        |      |      |
| ATOM | 8804 | C   | LEU | 510 | 17.303 | -94.368 | 43.701 | 1.00 | 0.00 |
| C    |      |     |     |     |        |         |        |      |      |
| ATOM | 8805 | O   | LEU | 510 | 16.321 | -95.119 | 43.764 | 1.00 | 0.00 |
| O    |      |     |     |     |        |         |        |      |      |
| ATOM | 8806 | N   | THR | 511 | 18.492 | -94.788 | 44.090 | 1.00 | 0.00 |
| N    |      |     |     |     |        |         |        |      |      |
| ATOM | 8807 | CA  | THR | 511 | 18.690 | -96.058 | 44.738 | 1.00 | 0.00 |
| C    |      |     |     |     |        |         |        |      |      |
| ATOM | 8808 | CB  | THR | 511 | 20.110 | -96.548 | 44.497 | 1.00 | 0.00 |
| C    |      |     |     |     |        |         |        |      |      |
| ATOM | 8809 | CG2 | THR | 511 | 20.314 | -97.286 | 43.191 | 1.00 | 0.00 |
| C    |      |     |     |     |        |         |        |      |      |
| ATOM | 8810 | OG1 | THR | 511 | 20.976 | -95.507 | 44.338 | 1.00 | 0.00 |
| O    |      |     |     |     |        |         |        |      |      |
| ATOM | 8811 | C   | THR | 511 | 18.479 | -95.891 | 46.278 | 1.00 | 0.00 |
| C    |      |     |     |     |        |         |        |      |      |
| ATOM | 8812 | O   | THR | 511 | 19.040 | -94.973 | 46.915 | 1.00 | 0.00 |
| O    |      |     |     |     |        |         |        |      |      |
| ATOM | 8813 | N   | VAL | 512 | 17.759 | -96.866 | 46.861 | 1.00 | 0.00 |
| N    |      |     |     |     |        |         |        |      |      |
| ATOM | 8814 | CA  | VAL | 512 | 17.529 | -96.865 | 48.307 | 1.00 | 0.00 |
| C    |      |     |     |     |        |         |        |      |      |
| ATOM | 8815 | CB  | VAL | 512 | 16.282 | -96.066 | 48.750 | 1.00 | 0.00 |
| C    |      |     |     |     |        |         |        |      |      |
| ATOM | 8816 | CG1 | VAL | 512 | 16.285 | -94.675 | 48.170 | 1.00 | 0.00 |
| C    |      |     |     |     |        |         |        |      |      |
| ATOM | 8817 | CG2 | VAL | 512 | 14.960 | -96.704 | 48.389 | 1.00 | 0.00 |
| C    |      |     |     |     |        |         |        |      |      |
| ATOM | 8818 | C   | VAL | 512 | 17.436 | -98.268 | 48.868 | 1.00 | 0.00 |
| C    |      |     |     |     |        |         |        |      |      |
| ATOM | 8819 | O   | VAL | 512 | 17.056 | -99.190 | 48.236 | 1.00 | 0.00 |
| O    |      |     |     |     |        |         |        |      |      |

|      |      |     |     |     |        |          |        |      |      |
|------|------|-----|-----|-----|--------|----------|--------|------|------|
| ATOM | 8820 | N   | TYR | 513 | 17.866 | -98.405  | 50.086 | 1.00 | 0.00 |
| N    |      |     |     |     |        |          |        |      |      |
| ATOM | 8821 | CA  | TYR | 513 | 18.045 | -99.620  | 50.949 | 1.00 | 0.00 |
| C    |      |     |     |     |        |          |        |      |      |
| ATOM | 8822 | CB  | TYR | 513 | 18.983 | -99.267  | 52.204 | 1.00 | 0.00 |
| C    |      |     |     |     |        |          |        |      |      |
| ATOM | 8823 | CG  | TYR | 513 | 20.450 | -99.172  | 51.913 | 1.00 | 0.00 |
| C    |      |     |     |     |        |          |        |      |      |
| ATOM | 8824 | CD1 | TYR | 513 | 21.196 | -99.947  | 50.989 | 1.00 | 0.00 |
| C    |      |     |     |     |        |          |        |      |      |
| ATOM | 8825 | CE1 | TYR | 513 | 22.592 | -99.911  | 50.915 | 1.00 | 0.00 |
| C    |      |     |     |     |        |          |        |      |      |
| ATOM | 8826 | CZ  | TYR | 513 | 23.299 | -99.028  | 51.799 | 1.00 | 0.00 |
| C    |      |     |     |     |        |          |        |      |      |
| ATOM | 8827 | OH  | TYR | 513 | 24.637 | -98.900  | 51.762 | 1.00 | 0.00 |
| O    |      |     |     |     |        |          |        |      |      |
| ATOM | 8828 | CE2 | TYR | 513 | 22.581 | -98.250  | 52.630 | 1.00 | 0.00 |
| C    |      |     |     |     |        |          |        |      |      |
| ATOM | 8829 | CD2 | TYR | 513 | 21.137 | -98.246  | 52.669 | 1.00 | 0.00 |
| C    |      |     |     |     |        |          |        |      |      |
| ATOM | 8830 | C   | TYR | 513 | 16.693 | -100.114 | 51.484 | 1.00 | 0.00 |
| C    |      |     |     |     |        |          |        |      |      |
| ATOM | 8831 | O   | TYR | 513 | 16.373 | -101.304 | 51.313 | 1.00 | 0.00 |
| O    |      |     |     |     |        |          |        |      |      |
| ATOM | 8832 | N   | LYS | 514 | 15.910 | -99.243  | 52.120 | 1.00 | 0.00 |
| N    |      |     |     |     |        |          |        |      |      |
| ATOM | 8833 | CA  | LYS | 514 | 14.454 | -99.508  | 52.394 | 1.00 | 0.00 |
| C    |      |     |     |     |        |          |        |      |      |
| ATOM | 8834 | CB  | LYS | 514 | 14.240 | -99.833  | 53.910 | 1.00 | 0.00 |
| C    |      |     |     |     |        |          |        |      |      |
| ATOM | 8835 | CG  | LYS | 514 | 15.093 | -100.898 | 54.459 | 1.00 | 0.00 |
| C    |      |     |     |     |        |          |        |      |      |
| ATOM | 8836 | CD  | LYS | 514 | 14.668 | -101.271 | 55.923 | 1.00 | 0.00 |
| C    |      |     |     |     |        |          |        |      |      |
| ATOM | 8837 | CE  | LYS | 514 | 14.852 | -100.124 | 56.953 | 1.00 | 0.00 |
| C    |      |     |     |     |        |          |        |      |      |
| ATOM | 8838 | NZ  | LYS | 514 | 16.134 | -99.367  | 56.869 | 1.00 | 0.00 |
| N1+  |      |     |     |     |        |          |        |      |      |
| ATOM | 8839 | C   | LYS | 514 | 13.462 | -98.411  | 51.897 | 1.00 | 0.00 |
| C    |      |     |     |     |        |          |        |      |      |
| ATOM | 8840 | O   | LYS | 514 | 13.789 | -97.242  | 51.790 | 1.00 | 0.00 |
| O    |      |     |     |     |        |          |        |      |      |
| ATOM | 8841 | N   | ALA | 515 | 12.294 | -98.963  | 51.578 | 1.00 | 0.00 |
| N    |      |     |     |     |        |          |        |      |      |
| ATOM | 8842 | CA  | ALA | 515 | 11.168 | -98.240  | 51.232 | 1.00 | 0.00 |
| C    |      |     |     |     |        |          |        |      |      |
| ATOM | 8843 | CB  | ALA | 515 | 11.075 | -98.129  | 49.655 | 1.00 | 0.00 |
| C    |      |     |     |     |        |          |        |      |      |
| ATOM | 8844 | C   | ALA | 515 | 9.930  | -98.927  | 51.830 | 1.00 | 0.00 |
| C    |      |     |     |     |        |          |        |      |      |
| ATOM | 8845 | O   | ALA | 515 | 9.946  | -100.106 | 52.287 | 1.00 | 0.00 |
| O    |      |     |     |     |        |          |        |      |      |
| ATOM | 8846 | N   | CYS | 516 | 8.836  | -98.114  | 52.019 | 1.00 | 0.00 |
| N    |      |     |     |     |        |          |        |      |      |

|      |      |     |     |     |        |          |        |      |      |
|------|------|-----|-----|-----|--------|----------|--------|------|------|
| ATOM | 8847 | CA  | CYS | 516 | 7.590  | -98.482  | 52.730 | 1.00 | 0.00 |
| C    |      |     |     |     |        |          |        |      |      |
| ATOM | 8848 | CB  | CYS | 516 | 7.635  | -98.115  | 54.203 | 1.00 | 0.00 |
| C    |      |     |     |     |        |          |        |      |      |
| ATOM | 8849 | SG  | CYS | 516 | 6.197  | -98.874  | 55.160 | 1.00 | 0.00 |
| S    |      |     |     |     |        |          |        |      |      |
| ATOM | 8850 | C   | CYS | 516 | 6.352  | -97.864  | 52.034 | 1.00 | 0.00 |
| C    |      |     |     |     |        |          |        |      |      |
| ATOM | 8851 | O   | CYS | 516 | 6.430  | -96.863  | 51.312 | 1.00 | 0.00 |
| O    |      |     |     |     |        |          |        |      |      |
| ATOM | 8852 | N   | ASN | 517 | 5.262  | -98.496  | 52.366 | 1.00 | 0.00 |
| N    |      |     |     |     |        |          |        |      |      |
| ATOM | 8853 | CA  | ASN | 517 | 3.927  | -98.339  | 51.787 | 1.00 | 0.00 |
| C    |      |     |     |     |        |          |        |      |      |
| ATOM | 8854 | CB  | ASN | 517 | 3.556  | -96.880  | 52.175 | 1.00 | 0.00 |
| C    |      |     |     |     |        |          |        |      |      |
| ATOM | 8855 | CG  | ASN | 517 | 3.855  | -96.478  | 53.595 | 1.00 | 0.00 |
| C    |      |     |     |     |        |          |        |      |      |
| ATOM | 8856 | OD1 | ASN | 517 | 3.134  | -96.860  | 54.503 | 1.00 | 0.00 |
| O    |      |     |     |     |        |          |        |      |      |
| ATOM | 8857 | ND2 | ASN | 517 | 4.876  | -95.678  | 53.761 | 1.00 | 0.00 |
| N    |      |     |     |     |        |          |        |      |      |
| ATOM | 8858 | C   | ASN | 517 | 3.705  | -98.714  | 50.302 | 1.00 | 0.00 |
| C    |      |     |     |     |        |          |        |      |      |
| ATOM | 8859 | O   | ASN | 517 | 3.008  | -98.046  | 49.567 | 1.00 | 0.00 |
| O    |      |     |     |     |        |          |        |      |      |
| ATOM | 8860 | N   | LEU | 518 | 4.443  | -99.719  | 49.874 | 1.00 | 0.00 |
| N    |      |     |     |     |        |          |        |      |      |
| ATOM | 8861 | CA  | LEU | 518 | 4.489  | -100.186 | 48.463 | 1.00 | 0.00 |
| C    |      |     |     |     |        |          |        |      |      |
| ATOM | 8862 | CB  | LEU | 518 | 5.942  | -100.397 | 48.055 | 1.00 | 0.00 |
| C    |      |     |     |     |        |          |        |      |      |
| ATOM | 8863 | CG  | LEU | 518 | 6.789  | -99.066  | 48.146 | 1.00 | 0.00 |
| C    |      |     |     |     |        |          |        |      |      |
| ATOM | 8864 | CD1 | LEU | 518 | 8.182  | -99.406  | 47.651 | 1.00 | 0.00 |
| C    |      |     |     |     |        |          |        |      |      |
| ATOM | 8865 | CD2 | LEU | 518 | 6.203  | -97.980  | 47.159 | 1.00 | 0.00 |
| C    |      |     |     |     |        |          |        |      |      |
| ATOM | 8866 | C   | LEU | 518 | 3.860  | -101.574 | 48.293 | 1.00 | 0.00 |
| C    |      |     |     |     |        |          |        |      |      |
| ATOM | 8867 | O   | LEU | 518 | 3.626  | -102.255 | 49.293 | 1.00 | 0.00 |
| O    |      |     |     |     |        |          |        |      |      |
| ATOM | 8868 | N   | ASN | 519 | 3.529  | -101.961 | 47.049 | 1.00 | 0.00 |
| N    |      |     |     |     |        |          |        |      |      |
| ATOM | 8869 | CA  | ASN | 519 | 3.385  | -103.269 | 46.526 | 1.00 | 0.00 |
| C    |      |     |     |     |        |          |        |      |      |
| ATOM | 8870 | CB  | ASN | 519 | 1.899  | -103.551 | 46.132 | 1.00 | 0.00 |
| C    |      |     |     |     |        |          |        |      |      |
| ATOM | 8871 | CG  | ASN | 519 | 0.941  | -103.366 | 47.296 | 1.00 | 0.00 |
| C    |      |     |     |     |        |          |        |      |      |
| ATOM | 8872 | OD1 | ASN | 519 | 1.224  | -103.782 | 48.434 | 1.00 | 0.00 |
| O    |      |     |     |     |        |          |        |      |      |
| ATOM | 8873 | ND2 | ASN | 519 | -0.225 | -102.752 | 47.124 | 1.00 | 0.00 |
| N    |      |     |     |     |        |          |        |      |      |

|      |      |     |     |     |               |        |      |      |
|------|------|-----|-----|-----|---------------|--------|------|------|
| ATOM | 8874 | C   | ASN | 519 | 4.315-103.550 | 45.361 | 1.00 | 0.00 |
| C    |      |     |     |     |               |        |      |      |
| ATOM | 8875 | O   | ASN | 519 | 4.883-102.658 | 44.706 | 1.00 | 0.00 |
| O    |      |     |     |     |               |        |      |      |
| ATOM | 8876 | N   | LEU | 520 | 4.488-104.856 | 45.001 | 1.00 | 0.00 |
| N    |      |     |     |     |               |        |      |      |
| ATOM | 8877 | CA  | LEU | 520 | 5.111-105.341 | 43.710 | 1.00 | 0.00 |
| C    |      |     |     |     |               |        |      |      |
| ATOM | 8878 | CB  | LEU | 520 | 6.057-106.533 | 43.894 | 1.00 | 0.00 |
| C    |      |     |     |     |               |        |      |      |
| ATOM | 8879 | CG  | LEU | 520 | 7.194-106.195 | 44.895 | 1.00 | 0.00 |
| C    |      |     |     |     |               |        |      |      |
| ATOM | 8880 | CD1 | LEU | 520 | 8.338-107.258 | 44.999 | 1.00 | 0.00 |
| C    |      |     |     |     |               |        |      |      |
| ATOM | 8881 | CD2 | LEU | 520 | 7.961-104.909 | 44.586 | 1.00 | 0.00 |
| C    |      |     |     |     |               |        |      |      |
| ATOM | 8882 | C   | LEU | 520 | 4.062-105.639 | 42.707 | 1.00 | 0.00 |
| C    |      |     |     |     |               |        |      |      |
| ATOM | 8883 | O   | LEU | 520 | 2.886-105.594 | 43.105 | 1.00 | 0.00 |
| O    |      |     |     |     |               |        |      |      |
| ATOM | 8884 | N   | ILE | 521 | 4.526-105.978 | 41.509 | 1.00 | 0.00 |
| N    |      |     |     |     |               |        |      |      |
| ATOM | 8885 | CA  | ILE | 521 | 3.685-106.490 | 40.435 | 1.00 | 0.00 |
| C    |      |     |     |     |               |        |      |      |
| ATOM | 8886 | CB  | ILE | 521 | 2.641-105.430 | 40.002 | 1.00 | 0.00 |
| C    |      |     |     |     |               |        |      |      |
| ATOM | 8887 | CG2 | ILE | 521 | 3.287-104.187 | 39.368 | 1.00 | 0.00 |
| C    |      |     |     |     |               |        |      |      |
| ATOM | 8888 | CG1 | ILE | 521 | 1.581-105.966 | 38.992 | 1.00 | 0.00 |
| C    |      |     |     |     |               |        |      |      |
| ATOM | 8889 | CD1 | ILE | 521 | 0.317-105.019 | 38.940 | 1.00 | 0.00 |
| C    |      |     |     |     |               |        |      |      |
| ATOM | 8890 | C   | ILE | 521 | 4.477-107.195 | 39.285 | 1.00 | 0.00 |
| C    |      |     |     |     |               |        |      |      |
| ATOM | 8891 | O   | ILE | 521 | 5.596-106.813 | 38.822 | 1.00 | 0.00 |
| O    |      |     |     |     |               |        |      |      |
| ATOM | 8892 | N   | GLY | 522 | 3.776-108.248 | 38.815 | 1.00 | 0.00 |
| N    |      |     |     |     |               |        |      |      |
| ATOM | 8893 | CA  | GLY | 522 | 4.220-109.116 | 37.750 | 1.00 | 0.00 |
| C    |      |     |     |     |               |        |      |      |
| ATOM | 8894 | C   | GLY | 522 | 5.458-109.942 | 38.104 | 1.00 | 0.00 |
| C    |      |     |     |     |               |        |      |      |
| ATOM | 8895 | O   | GLY | 522 | 6.157-109.673 | 39.113 | 1.00 | 0.00 |
| O    |      |     |     |     |               |        |      |      |
| ATOM | 8896 | N   | ARG | 523 | 5.731-111.011 | 37.363 | 1.00 | 0.00 |
| N    |      |     |     |     |               |        |      |      |
| ATOM | 8897 | CA  | ARG | 523 | 6.797-111.962 | 37.627 | 1.00 | 0.00 |
| C    |      |     |     |     |               |        |      |      |
| ATOM | 8898 | CB  | ARG | 523 | 6.746-113.223 | 36.700 | 1.00 | 0.00 |
| C    |      |     |     |     |               |        |      |      |
| ATOM | 8899 | CG  | ARG | 523 | 7.236-113.068 | 35.251 | 1.00 | 0.00 |
| C    |      |     |     |     |               |        |      |      |
| ATOM | 8900 | CD  | ARG | 523 | 6.994-114.452 | 34.486 | 1.00 | 0.00 |
| C    |      |     |     |     |               |        |      |      |

|      |      |     |     |     |                |        |      |      |
|------|------|-----|-----|-----|----------------|--------|------|------|
| ATOM | 8901 | NE  | ARG | 523 | 7.741-115.585  | 35.095 | 1.00 | 0.00 |
| N    |      |     |     |     |                |        |      |      |
| ATOM | 8902 | CZ  | ARG | 523 | 7.708-116.847  | 34.757 | 1.00 | 0.00 |
| C    |      |     |     |     |                |        |      |      |
| ATOM | 8903 | NH1 | ARG | 523 | 8.560-117.771  | 35.231 | 1.00 | 0.00 |
| N    |      |     |     |     |                |        |      |      |
| ATOM | 8904 | NH2 | ARG | 523 | 6.743-117.222  | 33.968 | 1.00 | 0.00 |
| N1+  |      |     |     |     |                |        |      |      |
| ATOM | 8905 | C   | ARG | 523 | 8.199-111.272  | 37.601 | 1.00 | 0.00 |
| C    |      |     |     |     |                |        |      |      |
| ATOM | 8906 | O   | ARG | 523 | 8.313-110.204  | 36.945 | 1.00 | 0.00 |
| O    |      |     |     |     |                |        |      |      |
| ATOM | 8907 | N   | PRO | 524 | 9.243-111.807  | 38.262 | 1.00 | 0.00 |
| N    |      |     |     |     |                |        |      |      |
| ATOM | 8908 | CD  | PRO | 524 | 9.228-112.761  | 39.381 | 1.00 | 0.00 |
| C    |      |     |     |     |                |        |      |      |
| ATOM | 8909 | CG  | PRO | 524 | 10.317-112.246 | 40.310 | 1.00 | 0.00 |
| C    |      |     |     |     |                |        |      |      |
| ATOM | 8910 | CB  | PRO | 524 | 11.369-111.882 | 39.276 | 1.00 | 0.00 |
| C    |      |     |     |     |                |        |      |      |
| ATOM | 8911 | CA  | PRO | 524 | 10.608-111.240 | 38.192 | 1.00 | 0.00 |
| C    |      |     |     |     |                |        |      |      |
| ATOM | 8912 | C   | PRO | 524 | 11.252-111.539 | 36.809 | 1.00 | 0.00 |
| C    |      |     |     |     |                |        |      |      |
| ATOM | 8913 | O   | PRO | 524 | 10.992-112.633 | 36.239 | 1.00 | 0.00 |
| O    |      |     |     |     |                |        |      |      |
| ATOM | 8914 | N   | SER | 525 | 11.975-110.576 | 36.261 | 1.00 | 0.00 |
| N    |      |     |     |     |                |        |      |      |
| ATOM | 8915 | CA  | SER | 525 | 12.773-110.736 | 35.030 | 1.00 | 0.00 |
| C    |      |     |     |     |                |        |      |      |
| ATOM | 8916 | CB  | SER | 525 | 12.290-109.776 | 33.950 | 1.00 | 0.00 |
| C    |      |     |     |     |                |        |      |      |
| ATOM | 8917 | OG  | SER | 525 | 10.941-109.923 | 33.738 | 1.00 | 0.00 |
| O    |      |     |     |     |                |        |      |      |
| ATOM | 8918 | C   | SER | 525 | 14.275-110.516 | 35.266 | 1.00 | 0.00 |
| C    |      |     |     |     |                |        |      |      |
| ATOM | 8919 | O   | SER | 525 | 14.638-109.856 | 36.227 | 1.00 | 0.00 |
| O    |      |     |     |     |                |        |      |      |
| ATOM | 8920 | N   | THR | 526 | 15.137-110.959 | 34.340 | 1.00 | 0.00 |
| N    |      |     |     |     |                |        |      |      |
| ATOM | 8921 | CA  | THR | 526 | 16.603-110.705 | 34.326 | 1.00 | 0.00 |
| C    |      |     |     |     |                |        |      |      |
| ATOM | 8922 | CB  | THR | 526 | 17.333-112.053 | 34.301 | 1.00 | 0.00 |
| C    |      |     |     |     |                |        |      |      |
| ATOM | 8923 | CG2 | THR | 526 | 18.825-111.958 | 34.144 | 1.00 | 0.00 |
| C    |      |     |     |     |                |        |      |      |
| ATOM | 8924 | OG1 | THR | 526 | 17.099-112.620 | 35.499 | 1.00 | 0.00 |
| O    |      |     |     |     |                |        |      |      |
| ATOM | 8925 | C   | THR | 526 | 17.034-109.809 | 33.113 | 1.00 | 0.00 |
| C    |      |     |     |     |                |        |      |      |
| ATOM | 8926 | O   | THR | 526 | 18.067-109.163 | 33.190 | 1.00 | 0.00 |
| O    |      |     |     |     |                |        |      |      |
| ATOM | 8927 | N   | GLU | 527 | 16.290-109.826 | 31.987 | 1.00 | 0.00 |
| N    |      |     |     |     |                |        |      |      |

|      |      |     |     |     |                |        |      |      |
|------|------|-----|-----|-----|----------------|--------|------|------|
| ATOM | 8928 | CA  | GLU | 527 | 16.561-108.934 | 30.829 | 1.00 | 0.00 |
| C    |      |     |     |     |                |        |      |      |
| ATOM | 8929 | CB  | GLU | 527 | 15.429-109.064 | 29.731 | 1.00 | 0.00 |
| C    |      |     |     |     |                |        |      |      |
| ATOM | 8930 | CG  | GLU | 527 | 14.069-108.376 | 29.934 | 1.00 | 0.00 |
| C    |      |     |     |     |                |        |      |      |
| ATOM | 8931 | CD  | GLU | 527 | 13.269-108.254 | 28.594 | 1.00 | 0.00 |
| C    |      |     |     |     |                |        |      |      |
| ATOM | 8932 | OE1 | GLU | 527 | 12.449-109.103 | 28.367 | 1.00 | 0.00 |
| O    |      |     |     |     |                |        |      |      |
| ATOM | 8933 | OE2 | GLU | 527 | 13.465-107.221 | 27.971 | 1.00 | 0.00 |
| O1-  |      |     |     |     |                |        |      |      |
| ATOM | 8934 | C   | GLU | 527 | 16.773-107.392 | 31.180 | 1.00 | 0.00 |
| C    |      |     |     |     |                |        |      |      |
| ATOM | 8935 | O   | GLU | 527 | 15.949-106.782 | 31.869 | 1.00 | 0.00 |
| O    |      |     |     |     |                |        |      |      |
| ATOM | 8936 | N   | HIP | 528 | 17.777-106.716 | 30.508 | 1.00 | 0.00 |
| N    |      |     |     |     |                |        |      |      |
| ATOM | 8937 | CA  | HIP | 528 | 17.849-105.247 | 30.389 | 1.00 | 0.00 |
| C    |      |     |     |     |                |        |      |      |
| ATOM | 8938 | CB  | HIP | 528 | 16.627-104.753 | 29.505 | 1.00 | 0.00 |
| C    |      |     |     |     |                |        |      |      |
| ATOM | 8939 | CG  | HIP | 528 | 16.736-105.091 | 28.102 | 1.00 | 0.00 |
| C    |      |     |     |     |                |        |      |      |
| ATOM | 8940 | ND1 | HIP | 528 | 15.749-105.681 | 27.329 | 1.00 | 0.00 |
| N1+  |      |     |     |     |                |        |      |      |
| ATOM | 8941 | CE1 | HIP | 528 | 16.149-105.625 | 26.053 | 1.00 | 0.00 |
| C    |      |     |     |     |                |        |      |      |
| ATOM | 8942 | NE2 | HIP | 528 | 17.387-105.234 | 26.026 | 1.00 | 0.00 |
| N    |      |     |     |     |                |        |      |      |
| ATOM | 8943 | CD2 | HIP | 528 | 17.760-104.682 | 27.247 | 1.00 | 0.00 |
| C    |      |     |     |     |                |        |      |      |
| ATOM | 8944 | C   | HIP | 528 | 18.009-104.503 | 31.784 | 1.00 | 0.00 |
| C    |      |     |     |     |                |        |      |      |
| ATOM | 8945 | O   | HIP | 528 | 17.690-103.309 | 31.864 | 1.00 | 0.00 |
| O    |      |     |     |     |                |        |      |      |
| ATOM | 8946 | N   | SER | 529 | 18.438-105.082 | 32.949 | 1.00 | 0.00 |
| N    |      |     |     |     |                |        |      |      |
| ATOM | 8947 | CA  | SER | 529 | 18.655-104.387 | 34.223 | 1.00 | 0.00 |
| C    |      |     |     |     |                |        |      |      |
| ATOM | 8948 | CB  | SER | 529 | 19.091-105.364 | 35.346 | 1.00 | 0.00 |
| C    |      |     |     |     |                |        |      |      |
| ATOM | 8949 | OG  | SER | 529 | 19.179-104.698 | 36.554 | 1.00 | 0.00 |
| O    |      |     |     |     |                |        |      |      |
| ATOM | 8950 | C   | SER | 529 | 19.754-103.334 | 34.098 | 1.00 | 0.00 |
| C    |      |     |     |     |                |        |      |      |
| ATOM | 8951 | O   | SER | 529 | 20.678-103.439 | 33.322 | 1.00 | 0.00 |
| O    |      |     |     |     |                |        |      |      |
| ATOM | 8952 | N   | TRP | 530 | 19.575-102.215 | 34.777 | 1.00 | 0.00 |
| N    |      |     |     |     |                |        |      |      |
| ATOM | 8953 | CA  | TRP | 530 | 20.521-101.109 | 34.965 | 1.00 | 0.00 |
| C    |      |     |     |     |                |        |      |      |
| ATOM | 8954 | CB  | TRP | 530 | 19.774-100.012 | 35.694 | 1.00 | 0.00 |
| C    |      |     |     |     |                |        |      |      |

|      |      |     |     |     |        |          |        |      |      |
|------|------|-----|-----|-----|--------|----------|--------|------|------|
| ATOM | 8955 | CG  | TRP | 530 | 18.766 | -99.280  | 34.844 | 1.00 | 0.00 |
| C    |      |     |     |     |        |          |        |      |      |
| ATOM | 8956 | CD1 | TRP | 530 | 18.790 | -99.168  | 33.493 | 1.00 | 0.00 |
| C    |      |     |     |     |        |          |        |      |      |
| ATOM | 8957 | NE1 | TRP | 530 | 17.675 | -98.404  | 33.047 | 1.00 | 0.00 |
| N    |      |     |     |     |        |          |        |      |      |
| ATOM | 8958 | CE2 | TRP | 530 | 16.864 | -98.070  | 34.042 | 1.00 | 0.00 |
| C    |      |     |     |     |        |          |        |      |      |
| ATOM | 8959 | CZ2 | TRP | 530 | 15.648 | -97.437  | 34.094 | 1.00 | 0.00 |
| C    |      |     |     |     |        |          |        |      |      |
| ATOM | 8960 | CH2 | TRP | 530 | 15.017 | -97.316  | 35.347 | 1.00 | 0.00 |
| C    |      |     |     |     |        |          |        |      |      |
| ATOM | 8961 | CZ3 | TRP | 530 | 15.623 | -97.794  | 36.529 | 1.00 | 0.00 |
| C    |      |     |     |     |        |          |        |      |      |
| ATOM | 8962 | CE3 | TRP | 530 | 16.828 | -98.487  | 36.420 | 1.00 | 0.00 |
| C    |      |     |     |     |        |          |        |      |      |
| ATOM | 8963 | CD2 | TRP | 530 | 17.530 | -98.610  | 35.181 | 1.00 | 0.00 |
| C    |      |     |     |     |        |          |        |      |      |
| ATOM | 8964 | C   | TRP | 530 | 21.704 | -101.571 | 35.811 | 1.00 | 0.00 |
| C    |      |     |     |     |        |          |        |      |      |
| ATOM | 8965 | O   | TRP | 530 | 22.803 | -101.149 | 35.462 | 1.00 | 0.00 |
| O    |      |     |     |     |        |          |        |      |      |
| ATOM | 8966 | N   | PHE | 531 | 21.493 | -102.396 | 36.817 | 1.00 | 0.00 |
| N    |      |     |     |     |        |          |        |      |      |
| ATOM | 8967 | CA  | PHE | 531 | 22.587 | -102.890 | 37.639 | 1.00 | 0.00 |
| C    |      |     |     |     |        |          |        |      |      |
| ATOM | 8968 | CB  | PHE | 531 | 22.279 | -102.751 | 39.105 | 1.00 | 0.00 |
| C    |      |     |     |     |        |          |        |      |      |
| ATOM | 8969 | CG  | PHE | 531 | 21.987 | -101.302 | 39.424 | 1.00 | 0.00 |
| C    |      |     |     |     |        |          |        |      |      |
| ATOM | 8970 | CD1 | PHE | 531 | 22.921 | -100.383 | 39.845 | 1.00 | 0.00 |
| C    |      |     |     |     |        |          |        |      |      |
| ATOM | 8971 | CE1 | PHE | 531 | 22.560 | -99.069  | 40.200 | 1.00 | 0.00 |
| C    |      |     |     |     |        |          |        |      |      |
| ATOM | 8972 | CZ  | PHE | 531 | 21.238 | -98.721  | 40.170 | 1.00 | 0.00 |
| C    |      |     |     |     |        |          |        |      |      |
| ATOM | 8973 | CE2 | PHE | 531 | 20.222 | -99.604  | 39.796 | 1.00 | 0.00 |
| C    |      |     |     |     |        |          |        |      |      |
| ATOM | 8974 | CD2 | PHE | 531 | 20.644 | -100.874 | 39.329 | 1.00 | 0.00 |
| C    |      |     |     |     |        |          |        |      |      |
| ATOM | 8975 | C   | PHE | 531 | 22.819 | -104.371 | 37.208 | 1.00 | 0.00 |
| C    |      |     |     |     |        |          |        |      |      |
| ATOM | 8976 | O   | PHE | 531 | 21.925 | -105.162 | 37.382 | 1.00 | 0.00 |
| O    |      |     |     |     |        |          |        |      |      |
| ATOM | 8977 | N   | PRO | 532 | 24.029 | -104.683 | 36.682 | 1.00 | 0.00 |
| N    |      |     |     |     |        |          |        |      |      |
| ATOM | 8978 | CD  | PRO | 532 | 25.124 | -103.794 | 36.382 | 1.00 | 0.00 |
| C    |      |     |     |     |        |          |        |      |      |
| ATOM | 8979 | CG  | PRO | 532 | 26.283 | -104.729 | 36.007 | 1.00 | 0.00 |
| C    |      |     |     |     |        |          |        |      |      |
| ATOM | 8980 | CB  | PRO | 532 | 25.611 | -106.014 | 35.525 | 1.00 | 0.00 |
| C    |      |     |     |     |        |          |        |      |      |
| ATOM | 8981 | CA  | PRO | 532 | 24.297 | -106.095 | 36.217 | 1.00 | 0.00 |
| C    |      |     |     |     |        |          |        |      |      |



|      |      |     |     |     |                |        |      |      |
|------|------|-----|-----|-----|----------------|--------|------|------|
| ATOM | 8982 | C   | PRO | 532 | 24.374-107.111 | 37.363 | 1.00 | 0.00 |
| C    |      |     |     |     |                |        |      |      |
| ATOM | 8983 | O   | PRO | 532 | 24.883-106.792 | 38.443 | 1.00 | 0.00 |
| O    |      |     |     |     |                |        |      |      |
| ATOM | 8984 | N   | GLY | 533 | 23.912-108.327 | 37.077 | 1.00 | 0.00 |
| N    |      |     |     |     |                |        |      |      |
| ATOM | 8985 | CA  | GLY | 533 | 23.929-109.390 | 38.075 | 1.00 | 0.00 |
| C    |      |     |     |     |                |        |      |      |
| ATOM | 8986 | C   | GLY | 533 | 22.783-109.359 | 39.041 | 1.00 | 0.00 |
| C    |      |     |     |     |                |        |      |      |
| ATOM | 8987 | O   | GLY | 533 | 22.534-110.336 | 39.804 | 1.00 | 0.00 |
| O    |      |     |     |     |                |        |      |      |
| ATOM | 8988 | N   | TYR | 534 | 22.048-108.220 | 39.052 | 1.00 | 0.00 |
| N    |      |     |     |     |                |        |      |      |
| ATOM | 8989 | CA  | TYR | 534 | 20.791-108.149 | 39.735 | 1.00 | 0.00 |
| C    |      |     |     |     |                |        |      |      |
| ATOM | 8990 | CB  | TYR | 534 | 20.734-106.672 | 40.356 | 1.00 | 0.00 |
| C    |      |     |     |     |                |        |      |      |
| ATOM | 8991 | CG  | TYR | 534 | 21.509-106.582 | 41.628 | 1.00 | 0.00 |
| C    |      |     |     |     |                |        |      |      |
| ATOM | 8992 | CD1 | TYR | 534 | 22.825-106.137 | 41.578 | 1.00 | 0.00 |
| C    |      |     |     |     |                |        |      |      |
| ATOM | 8993 | CE1 | TYR | 534 | 23.564-105.932 | 42.750 | 1.00 | 0.00 |
| C    |      |     |     |     |                |        |      |      |
| ATOM | 8994 | CZ  | TYR | 534 | 22.993-106.363 | 43.949 | 1.00 | 0.00 |
| C    |      |     |     |     |                |        |      |      |
| ATOM | 8995 | OH  | TYR | 534 | 23.667-106.273 | 45.101 | 1.00 | 0.00 |
| O    |      |     |     |     |                |        |      |      |
| ATOM | 8996 | CE2 | TYR | 534 | 21.706-106.877 | 43.991 | 1.00 | 0.00 |
| C    |      |     |     |     |                |        |      |      |
| ATOM | 8997 | CD2 | TYR | 534 | 20.922-107.026 | 42.843 | 1.00 | 0.00 |
| C    |      |     |     |     |                |        |      |      |
| ATOM | 8998 | C   | TYR | 534 | 19.657-108.416 | 38.793 | 1.00 | 0.00 |
| C    |      |     |     |     |                |        |      |      |
| ATOM | 8999 | O   | TYR | 534 | 19.603-107.745 | 37.798 | 1.00 | 0.00 |
| O    |      |     |     |     |                |        |      |      |
| ATOM | 9000 | N   | ALA | 535 | 18.785-109.409 | 39.063 | 1.00 | 0.00 |
| N    |      |     |     |     |                |        |      |      |
| ATOM | 9001 | CA  | ALA | 535 | 17.459-109.476 | 38.443 | 1.00 | 0.00 |
| C    |      |     |     |     |                |        |      |      |
| ATOM | 9002 | CB  | ALA | 535 | 16.785-110.812 | 38.763 | 1.00 | 0.00 |
| C    |      |     |     |     |                |        |      |      |
| ATOM | 9003 | C   | ALA | 535 | 16.477-108.420 | 39.083 | 1.00 | 0.00 |
| C    |      |     |     |     |                |        |      |      |
| ATOM | 9004 | O   | ALA | 535 | 16.671-107.809 | 40.176 | 1.00 | 0.00 |
| O    |      |     |     |     |                |        |      |      |
| ATOM | 9005 | N   | TRP | 536 | 15.380-108.112 | 38.405 | 1.00 | 0.00 |
| N    |      |     |     |     |                |        |      |      |
| ATOM | 9006 | CA  | TRP | 536 | 14.370-107.105 | 38.854 | 1.00 | 0.00 |
| C    |      |     |     |     |                |        |      |      |
| ATOM | 9007 | CB  | TRP | 536 | 14.456-105.810 | 37.999 | 1.00 | 0.00 |
| C    |      |     |     |     |                |        |      |      |
| ATOM | 9008 | CG  | TRP | 536 | 14.359-105.920 | 36.481 | 1.00 | 0.00 |
| C    |      |     |     |     |                |        |      |      |

|      |      |     |     |     |                |        |      |      |
|------|------|-----|-----|-----|----------------|--------|------|------|
| ATOM | 9009 | CD1 | TRP | 536 | 15.428-106.034 | 35.705 | 1.00 | 0.00 |
| C    |      |     |     |     |                |        |      |      |
| ATOM | 9010 | NE1 | TRP | 536 | 15.060-106.211 | 34.367 | 1.00 | 0.00 |
| N    |      |     |     |     |                |        |      |      |
| ATOM | 9011 | CE2 | TRP | 536 | 13.726-106.141 | 34.218 | 1.00 | 0.00 |
| C    |      |     |     |     |                |        |      |      |
| ATOM | 9012 | CZ2 | TRP | 536 | 12.890-106.093 | 33.073 | 1.00 | 0.00 |
| C    |      |     |     |     |                |        |      |      |
| ATOM | 9013 | CH2 | TRP | 536 | 11.498-106.082 | 33.242 | 1.00 | 0.00 |
| C    |      |     |     |     |                |        |      |      |
| ATOM | 9014 | CZ3 | TRP | 536 | 10.957-106.079 | 34.554 | 1.00 | 0.00 |
| C    |      |     |     |     |                |        |      |      |
| ATOM | 9015 | CE3 | TRP | 536 | 11.822-105.940 | 35.645 | 1.00 | 0.00 |
| C    |      |     |     |     |                |        |      |      |
| ATOM | 9016 | CD2 | TRP | 536 | 13.212-106.002 | 35.558 | 1.00 | 0.00 |
| C    |      |     |     |     |                |        |      |      |
| ATOM | 9017 | C   | TRP | 536 | 12.939-107.594 | 38.914 | 1.00 | 0.00 |
| C    |      |     |     |     |                |        |      |      |
| ATOM | 9018 | O   | TRP | 536 | 12.573-108.676 | 38.458 | 1.00 | 0.00 |
| O    |      |     |     |     |                |        |      |      |
| ATOM | 9019 | N   | THR | 537 | 12.092-106.753 | 39.591 | 1.00 | 0.00 |
| N    |      |     |     |     |                |        |      |      |
| ATOM | 9020 | CA  | THR | 537 | 10.646-106.828 | 39.629 | 1.00 | 0.00 |
| C    |      |     |     |     |                |        |      |      |
| ATOM | 9021 | CB  | THR | 537 | 10.200-107.617 | 40.834 | 1.00 | 0.00 |
| C    |      |     |     |     |                |        |      |      |
| ATOM | 9022 | CG2 | THR | 537 | 8.770-108.060  | 40.667 | 1.00 | 0.00 |
| C    |      |     |     |     |                |        |      |      |
| ATOM | 9023 | OG1 | THR | 537 | 10.688-108.901 | 40.787 | 1.00 | 0.00 |
| O    |      |     |     |     |                |        |      |      |
| ATOM | 9024 | C   | THR | 537 | 10.013-105.372 | 39.657 | 1.00 | 0.00 |
| C    |      |     |     |     |                |        |      |      |
| ATOM | 9025 | O   | THR | 537 | 10.483-104.521 | 40.375 | 1.00 | 0.00 |
| O    |      |     |     |     |                |        |      |      |
| ATOM | 9026 | N   | VAL | 538 | 8.904-105.052  | 39.038 | 1.00 | 0.00 |
| N    |      |     |     |     |                |        |      |      |
| ATOM | 9027 | CA  | VAL | 538 | 8.187-103.708  | 39.089 | 1.00 | 0.00 |
| C    |      |     |     |     |                |        |      |      |
| ATOM | 9028 | CB  | VAL | 538 | 7.229-103.561  | 37.891 | 1.00 | 0.00 |
| C    |      |     |     |     |                |        |      |      |
| ATOM | 9029 | CG1 | VAL | 538 | 6.603-102.101  | 37.876 | 1.00 | 0.00 |
| C    |      |     |     |     |                |        |      |      |
| ATOM | 9030 | CG2 | VAL | 538 | 8.005-103.878  | 36.566 | 1.00 | 0.00 |
| C    |      |     |     |     |                |        |      |      |
| ATOM | 9031 | C   | VAL | 538 | 7.426-103.411  | 40.365 | 1.00 | 0.00 |
| C    |      |     |     |     |                |        |      |      |
| ATOM | 9032 | O   | VAL | 538 | 6.807-104.300  | 40.964 | 1.00 | 0.00 |
| O    |      |     |     |     |                |        |      |      |
| ATOM | 9033 | N   | ALA | 539 | 7.483-102.174  | 40.838 | 1.00 | 0.00 |
| N    |      |     |     |     |                |        |      |      |
| ATOM | 9034 | CA  | ALA | 539 | 6.902-101.685  | 42.125 | 1.00 | 0.00 |
| C    |      |     |     |     |                |        |      |      |
| ATOM | 9035 | CB  | ALA | 539 | 7.948-101.319  | 43.170 | 1.00 | 0.00 |
| C    |      |     |     |     |                |        |      |      |

|      |      |     |     |     |        |          |        |      |      |
|------|------|-----|-----|-----|--------|----------|--------|------|------|
| ATOM | 9036 | C   | ALA | 539 | 6.014  | -100.439 | 41.981 | 1.00 | 0.00 |
| C    |      |     |     |     |        |          |        |      |      |
| ATOM | 9037 | O   | ALA | 539 | 6.433  | -99.544  | 41.257 | 1.00 | 0.00 |
| O    |      |     |     |     |        |          |        |      |      |
| ATOM | 9038 | N   | GLN | 540 | 4.969  | -100.428 | 42.823 | 1.00 | 0.00 |
| N    |      |     |     |     |        |          |        |      |      |
| ATOM | 9039 | CA  | GLN | 540 | 3.852  | -99.413  | 42.771 | 1.00 | 0.00 |
| C    |      |     |     |     |        |          |        |      |      |
| ATOM | 9040 | CB  | GLN | 540 | 2.756  | -99.890  | 41.807 | 1.00 | 0.00 |
| C    |      |     |     |     |        |          |        |      |      |
| ATOM | 9041 | CG  | GLN | 540 | 2.265  | -101.313 | 42.125 | 1.00 | 0.00 |
| C    |      |     |     |     |        |          |        |      |      |
| ATOM | 9042 | CD  | GLN | 540 | 0.912  | -101.713 | 41.490 | 1.00 | 0.00 |
| C    |      |     |     |     |        |          |        |      |      |
| ATOM | 9043 | OE1 | GLN | 540 | -0.003 | -102.145 | 42.080 | 1.00 | 0.00 |
| O    |      |     |     |     |        |          |        |      |      |
| ATOM | 9044 | NE2 | GLN | 540 | 0.738  | -101.535 | 40.233 | 1.00 | 0.00 |
| N    |      |     |     |     |        |          |        |      |      |
| ATOM | 9045 | C   | GLN | 540 | 3.345  | -99.011  | 44.129 | 1.00 | 0.00 |
| C    |      |     |     |     |        |          |        |      |      |
| ATOM | 9046 | O   | GLN | 540 | 3.436  | -99.901  | 44.988 | 1.00 | 0.00 |
| O    |      |     |     |     |        |          |        |      |      |
| ATOM | 9047 | N   | CYM | 541 | 2.676  | -97.871  | 44.194 | 1.00 | 0.00 |
| N    |      |     |     |     |        |          |        |      |      |
| ATOM | 9048 | CA  | CYM | 541 | 2.124  | -97.412  | 45.451 | 1.00 | 0.00 |
| C    |      |     |     |     |        |          |        |      |      |
| ATOM | 9049 | CB  | CYM | 541 | 1.602  | -96.005  | 45.045 | 1.00 | 0.00 |
| C    |      |     |     |     |        |          |        |      |      |
| ATOM | 9050 | SG  | CYM | 541 | 1.077  | -95.169  | 46.581 | 1.00 | 0.00 |
| S    |      |     |     |     |        |          |        |      |      |
| ATOM | 9051 | C   | CYM | 541 | 1.082  | -98.390  | 46.009 | 1.00 | 0.00 |
| C    |      |     |     |     |        |          |        |      |      |
| ATOM | 9052 | O   | CYM | 541 | 0.460  | -99.197  | 45.243 | 1.00 | 0.00 |
| O    |      |     |     |     |        |          |        |      |      |
| ATOM | 9053 | N   | LYS | 542 | 0.953  | -98.431  | 47.381 | 1.00 | 0.00 |
| N    |      |     |     |     |        |          |        |      |      |
| ATOM | 9054 | CA  | LYS | 542 | -0.128 | -99.223  | 48.001 | 1.00 | 0.00 |
| C    |      |     |     |     |        |          |        |      |      |
| ATOM | 9055 | CB  | LYS | 542 | 0.351  | -99.708  | 49.363 | 1.00 | 0.00 |
| C    |      |     |     |     |        |          |        |      |      |
| ATOM | 9056 | CG  | LYS | 542 | -0.726 | -100.521 | 50.165 | 1.00 | 0.00 |
| C    |      |     |     |     |        |          |        |      |      |
| ATOM | 9057 | CD  | LYS | 542 | -0.152 | -101.212 | 51.379 | 1.00 | 0.00 |
| C    |      |     |     |     |        |          |        |      |      |
| ATOM | 9058 | CE  | LYS | 542 | 0.801  | -102.418 | 51.171 | 1.00 | 0.00 |
| C    |      |     |     |     |        |          |        |      |      |
| ATOM | 9059 | NZ  | LYS | 542 | 0.133  | -103.683 | 51.060 | 1.00 | 0.00 |
| N1+  |      |     |     |     |        |          |        |      |      |
| ATOM | 9060 | C   | LYS | 542 | -1.393 | -98.346  | 48.186 | 1.00 | 0.00 |
| C    |      |     |     |     |        |          |        |      |      |
| ATOM | 9061 | O   | LYS | 542 | -2.487 | -98.864  | 48.023 | 1.00 | 0.00 |
| O    |      |     |     |     |        |          |        |      |      |
| ATOM | 9062 | N   | ILE | 543 | -1.296 | -96.970  | 48.375 | 1.00 | 0.00 |
| N    |      |     |     |     |        |          |        |      |      |

|      |      |     |     |     |        |         |        |      |      |
|------|------|-----|-----|-----|--------|---------|--------|------|------|
| ATOM | 9063 | CA  | ILE | 543 | -2.372 | -95.956 | 48.479 | 1.00 | 0.00 |
| C    |      |     |     |     |        |         |        |      |      |
| ATOM | 9064 | CB  | ILE | 543 | -1.860 | -94.793 | 49.395 | 1.00 | 0.00 |
| C    |      |     |     |     |        |         |        |      |      |
| ATOM | 9065 | CG2 | ILE | 543 | -2.818 | -93.618 | 49.548 | 1.00 | 0.00 |
| C    |      |     |     |     |        |         |        |      |      |
| ATOM | 9066 | CG1 | ILE | 543 | -1.521 | -95.303 | 50.882 | 1.00 | 0.00 |
| C    |      |     |     |     |        |         |        |      |      |
| ATOM | 9067 | CD1 | ILE | 543 | -0.648 | -94.353 | 51.738 | 1.00 | 0.00 |
| C    |      |     |     |     |        |         |        |      |      |
| ATOM | 9068 | C   | ILE | 543 | -3.030 | -95.499 | 47.089 | 1.00 | 0.00 |
| C    |      |     |     |     |        |         |        |      |      |
| ATOM | 9069 | O   | ILE | 543 | -4.187 | -95.164 | 47.089 | 1.00 | 0.00 |
| O    |      |     |     |     |        |         |        |      |      |
| ATOM | 9070 | N   | CYM | 544 | -2.295 | -95.717 | 45.953 | 1.00 | 0.00 |
| N    |      |     |     |     |        |         |        |      |      |
| ATOM | 9071 | CA  | CYM | 544 | -2.851 | -95.385 | 44.628 | 1.00 | 0.00 |
| C    |      |     |     |     |        |         |        |      |      |
| ATOM | 9072 | CB  | CYM | 544 | -2.348 | -94.039 | 44.109 | 1.00 | 0.00 |
| C    |      |     |     |     |        |         |        |      |      |
| ATOM | 9073 | SG  | CYM | 544 | -0.635 | -94.148 | 43.673 | 1.00 | 0.00 |
| S    |      |     |     |     |        |         |        |      |      |
| ATOM | 9074 | C   | CYM | 544 | -2.662 | -96.479 | 43.520 | 1.00 | 0.00 |
| C    |      |     |     |     |        |         |        |      |      |
| ATOM | 9075 | O   | CYM | 544 | -3.333 | -96.305 | 42.517 | 1.00 | 0.00 |
| O    |      |     |     |     |        |         |        |      |      |
| ATOM | 9076 | N   | ALA | 545 | -1.731 | -97.430 | 43.674 | 1.00 | 0.00 |
| N    |      |     |     |     |        |         |        |      |      |
| ATOM | 9077 | CA  | ALA | 545 | -1.282 | -98.336 | 42.622 | 1.00 | 0.00 |
| C    |      |     |     |     |        |         |        |      |      |
| ATOM | 9078 | CB  | ALA | 545 | -2.398 | -99.330 | 42.265 | 1.00 | 0.00 |
| C    |      |     |     |     |        |         |        |      |      |
| ATOM | 9079 | C   | ALA | 545 | -0.581 | -97.680 | 41.449 | 1.00 | 0.00 |
| C    |      |     |     |     |        |         |        |      |      |
| ATOM | 9080 | O   | ALA | 545 | -0.351 | -98.318 | 40.398 | 1.00 | 0.00 |
| O    |      |     |     |     |        |         |        |      |      |
| ATOM | 9081 | N   | SER | 546 | -0.212 | -96.382 | 41.547 | 1.00 | 0.00 |
| N    |      |     |     |     |        |         |        |      |      |
| ATOM | 9082 | CA  | SER | 546 | 0.566  | -95.762 | 40.465 | 1.00 | 0.00 |
| C    |      |     |     |     |        |         |        |      |      |
| ATOM | 9083 | CB  | SER | 546 | 0.557  | -94.256 | 40.530 | 1.00 | 0.00 |
| C    |      |     |     |     |        |         |        |      |      |
| ATOM | 9084 | OG  | SER | 546 | -0.664 | -93.634 | 40.948 | 1.00 | 0.00 |
| O    |      |     |     |     |        |         |        |      |      |
| ATOM | 9085 | C   | SER | 546 | 2.027  | -96.212 | 40.464 | 1.00 | 0.00 |
| C    |      |     |     |     |        |         |        |      |      |
| ATOM | 9086 | O   | SER | 546 | 2.604  | -96.488 | 41.516 | 1.00 | 0.00 |
| O    |      |     |     |     |        |         |        |      |      |
| ATOM | 9087 | N   | HIE | 547 | 2.681  | -96.404 | 39.294 | 1.00 | 0.00 |
| N    |      |     |     |     |        |         |        |      |      |
| ATOM | 9088 | CA  | HIE | 547 | 4.036  | -97.022 | 39.183 | 1.00 | 0.00 |
| C    |      |     |     |     |        |         |        |      |      |
| ATOM | 9089 | CB  | HIE | 547 | 4.349  | -97.169 | 37.686 | 1.00 | 0.00 |
| C    |      |     |     |     |        |         |        |      |      |

|      |      |     |     |     |        |          |        |      |      |
|------|------|-----|-----|-----|--------|----------|--------|------|------|
| ATOM | 9090 | CG  | HIE | 547 | 5.797  | -97.550  | 37.357 | 1.00 | 0.00 |
| C    |      |     |     |     |        |          |        |      |      |
| ATOM | 9091 | ND1 | HIE | 547 | 6.814  | -96.646  | 37.035 | 1.00 | 0.00 |
| N    |      |     |     |     |        |          |        |      |      |
| ATOM | 9092 | CE1 | HIE | 547 | 7.967  | -97.401  | 36.868 | 1.00 | 0.00 |
| C    |      |     |     |     |        |          |        |      |      |
| ATOM | 9093 | NE2 | HIE | 547 | 7.729  | -98.675  | 37.252 | 1.00 | 0.00 |
| N    |      |     |     |     |        |          |        |      |      |
| ATOM | 9094 | CD2 | HIE | 547 | 6.346  | -98.795  | 37.493 | 1.00 | 0.00 |
| C    |      |     |     |     |        |          |        |      |      |
| ATOM | 9095 | C   | HIE | 547 | 5.071  | -96.105  | 39.878 | 1.00 | 0.00 |
| C    |      |     |     |     |        |          |        |      |      |
| ATOM | 9096 | O   | HIE | 547 | 5.007  | -94.923  | 39.602 | 1.00 | 0.00 |
| O    |      |     |     |     |        |          |        |      |      |
| ATOM | 9097 | N   | ILE | 548 | 5.975  | -96.617  | 40.672 | 1.00 | 0.00 |
| N    |      |     |     |     |        |          |        |      |      |
| ATOM | 9098 | CA  | ILE | 548 | 6.961  | -95.896  | 41.425 | 1.00 | 0.00 |
| C    |      |     |     |     |        |          |        |      |      |
| ATOM | 9099 | CB  | ILE | 548 | 6.653  | -96.045  | 42.968 | 1.00 | 0.00 |
| C    |      |     |     |     |        |          |        |      |      |
| ATOM | 9100 | CG2 | ILE | 548 | 7.554  | -96.958  | 43.766 | 1.00 | 0.00 |
| C    |      |     |     |     |        |          |        |      |      |
| ATOM | 9101 | CG1 | ILE | 548 | 6.399  | -94.617  | 43.648 | 1.00 | 0.00 |
| C    |      |     |     |     |        |          |        |      |      |
| ATOM | 9102 | CD1 | ILE | 548 | 5.885  | -94.616  | 45.085 | 1.00 | 0.00 |
| C    |      |     |     |     |        |          |        |      |      |
| ATOM | 9103 | C   | ILE | 548 | 8.373  | -96.177  | 41.098 | 1.00 | 0.00 |
| C    |      |     |     |     |        |          |        |      |      |
| ATOM | 9104 | O   | ILE | 548 | 9.305  | -95.403  | 41.389 | 1.00 | 0.00 |
| O    |      |     |     |     |        |          |        |      |      |
| ATOM | 9105 | N   | GLY | 549 | 8.602  | -97.317  | 40.466 | 1.00 | 0.00 |
| N    |      |     |     |     |        |          |        |      |      |
| ATOM | 9106 | CA  | GLY | 549 | 9.928  | -97.855  | 40.170 | 1.00 | 0.00 |
| C    |      |     |     |     |        |          |        |      |      |
| ATOM | 9107 | C   | GLY | 549 | 9.990  | -99.368  | 40.093 | 1.00 | 0.00 |
| C    |      |     |     |     |        |          |        |      |      |
| ATOM | 9108 | O   | GLY | 549 | 9.054  | -100.039 | 39.614 | 1.00 | 0.00 |
| O    |      |     |     |     |        |          |        |      |      |
| ATOM | 9109 | N   | TRP | 550 | 11.076 | -99.910  | 40.529 | 1.00 | 0.00 |
| N    |      |     |     |     |        |          |        |      |      |
| ATOM | 9110 | CA  | TRP | 550 | 11.413 | -101.335 | 40.576 | 1.00 | 0.00 |
| C    |      |     |     |     |        |          |        |      |      |
| ATOM | 9111 | CB  | TRP | 550 | 12.203 | -101.643 | 39.289 | 1.00 | 0.00 |
| C    |      |     |     |     |        |          |        |      |      |
| ATOM | 9112 | CG  | TRP | 550 | 11.687 | -101.071 | 38.031 | 1.00 | 0.00 |
| C    |      |     |     |     |        |          |        |      |      |
| ATOM | 9113 | CD1 | TRP | 550 | 11.015 | -101.829 | 37.117 | 1.00 | 0.00 |
| C    |      |     |     |     |        |          |        |      |      |
| ATOM | 9114 | NE1 | TRP | 550 | 10.597 | -101.055 | 36.005 | 1.00 | 0.00 |
| N    |      |     |     |     |        |          |        |      |      |
| ATOM | 9115 | CE2 | TRP | 550 | 10.914 | -99.699  | 36.221 | 1.00 | 0.00 |
| C    |      |     |     |     |        |          |        |      |      |
| ATOM | 9116 | CZ2 | TRP | 550 | 10.783 | -98.552  | 35.408 | 1.00 | 0.00 |
| C    |      |     |     |     |        |          |        |      |      |

|      |      |     |     |     |        |          |        |      |      |
|------|------|-----|-----|-----|--------|----------|--------|------|------|
| ATOM | 9117 | CH2 | TRP | 550 | 11.379 | -97.379  | 35.819 | 1.00 | 0.00 |
| C    |      |     |     |     |        |          |        |      |      |
| ATOM | 9118 | CZ3 | TRP | 550 | 12.119 | -97.421  | 36.984 | 1.00 | 0.00 |
| C    |      |     |     |     |        |          |        |      |      |
| ATOM | 9119 | CE3 | TRP | 550 | 12.211 | -98.526  | 37.835 | 1.00 | 0.00 |
| C    |      |     |     |     |        |          |        |      |      |
| ATOM | 9120 | CD2 | TRP | 550 | 11.587 | -99.713  | 37.518 | 1.00 | 0.00 |
| C    |      |     |     |     |        |          |        |      |      |
| ATOM | 9121 | C   | TRP | 550 | 12.057 | -101.715 | 41.906 | 1.00 | 0.00 |
| C    |      |     |     |     |        |          |        |      |      |
| ATOM | 9122 | O   | TRP | 550 | 12.569 | -100.835 | 42.611 | 1.00 | 0.00 |
| O    |      |     |     |     |        |          |        |      |      |
| ATOM | 9123 | N   | LYS | 551 | 11.858 | -102.958 | 42.343 | 1.00 | 0.00 |
| N    |      |     |     |     |        |          |        |      |      |
| ATOM | 9124 | CA  | LYS | 551 | 12.659 | -103.570 | 43.374 | 1.00 | 0.00 |
| C    |      |     |     |     |        |          |        |      |      |
| ATOM | 9125 | CB  | LYS | 551 | 11.810 | -104.393 | 44.386 | 1.00 | 0.00 |
| C    |      |     |     |     |        |          |        |      |      |
| ATOM | 9126 | CG  | LYS | 551 | 12.508 | -104.842 | 45.671 | 1.00 | 0.00 |
| C    |      |     |     |     |        |          |        |      |      |
| ATOM | 9127 | CD  | LYS | 551 | 11.704 | -105.803 | 46.474 | 1.00 | 0.00 |
| C    |      |     |     |     |        |          |        |      |      |
| ATOM | 9128 | CE  | LYS | 551 | 12.589 | -106.283 | 47.655 | 1.00 | 0.00 |
| C    |      |     |     |     |        |          |        |      |      |
| ATOM | 9129 | NZ  | LYS | 551 | 12.002 | -107.417 | 48.330 | 1.00 | 0.00 |
| N1+  |      |     |     |     |        |          |        |      |      |
| ATOM | 9130 | C   | LYS | 551 | 13.644 | -104.494 | 42.629 | 1.00 | 0.00 |
| C    |      |     |     |     |        |          |        |      |      |
| ATOM | 9131 | O   | LYS | 551 | 13.367 | -105.075 | 41.551 | 1.00 | 0.00 |
| O    |      |     |     |     |        |          |        |      |      |
| ATOM | 9132 | N   | PHE | 552 | 14.848 | -104.619 | 43.197 | 1.00 | 0.00 |
| N    |      |     |     |     |        |          |        |      |      |
| ATOM | 9133 | CA  | PHE | 552 | 15.865 | -105.553 | 42.610 | 1.00 | 0.00 |
| C    |      |     |     |     |        |          |        |      |      |
| ATOM | 9134 | CB  | PHE | 552 | 17.060 | -104.624 | 42.337 | 1.00 | 0.00 |
| C    |      |     |     |     |        |          |        |      |      |
| ATOM | 9135 | CG  | PHE | 552 | 16.828 | -103.631 | 41.241 | 1.00 | 0.00 |
| C    |      |     |     |     |        |          |        |      |      |
| ATOM | 9136 | CD1 | PHE | 552 | 16.197 | -102.410 | 41.447 | 1.00 | 0.00 |
| C    |      |     |     |     |        |          |        |      |      |
| ATOM | 9137 | CE1 | PHE | 552 | 16.125 | -101.496 | 40.403 | 1.00 | 0.00 |
| C    |      |     |     |     |        |          |        |      |      |
| ATOM | 9138 | CZ  | PHE | 552 | 16.627 | -101.766 | 39.140 | 1.00 | 0.00 |
| C    |      |     |     |     |        |          |        |      |      |
| ATOM | 9139 | CE2 | PHE | 552 | 17.050 | -103.098 | 38.892 | 1.00 | 0.00 |
| C    |      |     |     |     |        |          |        |      |      |
| ATOM | 9140 | CD2 | PHE | 552 | 17.223 | -103.995 | 39.902 | 1.00 | 0.00 |
| C    |      |     |     |     |        |          |        |      |      |
| ATOM | 9141 | C   | PHE | 552 | 16.292 | -106.664 | 43.623 | 1.00 | 0.00 |
| C    |      |     |     |     |        |          |        |      |      |
| ATOM | 9142 | O   | PHE | 552 | 16.088 | -106.536 | 44.823 | 1.00 | 0.00 |
| O    |      |     |     |     |        |          |        |      |      |
| ATOM | 9143 | N   | THR | 553 | 16.748 | -107.729 | 43.059 | 1.00 | 0.00 |
| N    |      |     |     |     |        |          |        |      |      |

|      |      |     |     |     |                |        |      |      |
|------|------|-----|-----|-----|----------------|--------|------|------|
| ATOM | 9144 | CA  | THR | 553 | 17.150-108.987 | 43.823 | 1.00 | 0.00 |
| C    |      |     |     |     |                |        |      |      |
| ATOM | 9145 | CB  | THR | 553 | 15.938-109.865 | 43.993 | 1.00 | 0.00 |
| C    |      |     |     |     |                |        |      |      |
| ATOM | 9146 | CG2 | THR | 553 | 16.141-111.270 | 44.558 | 1.00 | 0.00 |
| C    |      |     |     |     |                |        |      |      |
| ATOM | 9147 | OG1 | THR | 553 | 14.963-109.266 | 44.893 | 1.00 | 0.00 |
| O    |      |     |     |     |                |        |      |      |
| ATOM | 9148 | C   | THR | 553 | 18.398-109.682 | 43.180 | 1.00 | 0.00 |
| C    |      |     |     |     |                |        |      |      |
| ATOM | 9149 | O   | THR | 553 | 18.522-109.844 | 41.968 | 1.00 | 0.00 |
| O    |      |     |     |     |                |        |      |      |
| ATOM | 9150 | N   | ALA | 554 | 19.319-110.183 | 44.012 | 1.00 | 0.00 |
| N    |      |     |     |     |                |        |      |      |
| ATOM | 9151 | CA  | ALA | 554 | 20.563-110.770 | 43.567 | 1.00 | 0.00 |
| C    |      |     |     |     |                |        |      |      |
| ATOM | 9152 | CB  | ALA | 554 | 21.487-111.066 | 44.807 | 1.00 | 0.00 |
| C    |      |     |     |     |                |        |      |      |
| ATOM | 9153 | C   | ALA | 554 | 20.430-112.137 | 42.777 | 1.00 | 0.00 |
| C    |      |     |     |     |                |        |      |      |
| ATOM | 9154 | O   | ALA | 554 | 19.660-113.018 | 43.130 | 1.00 | 0.00 |
| O    |      |     |     |     |                |        |      |      |
| ATOM | 9155 | N   | THR | 555 | 21.259-112.289 | 41.706 | 1.00 | 0.00 |
| N    |      |     |     |     |                |        |      |      |
| ATOM | 9156 | CA  | THR | 555 | 21.388-113.580 | 40.977 | 1.00 | 0.00 |
| C    |      |     |     |     |                |        |      |      |
| ATOM | 9157 | CB  | THR | 555 | 21.822-113.536 | 39.503 | 1.00 | 0.00 |
| C    |      |     |     |     |                |        |      |      |
| ATOM | 9158 | CG2 | THR | 555 | 20.722-112.838 | 38.737 | 1.00 | 0.00 |
| C    |      |     |     |     |                |        |      |      |
| ATOM | 9159 | OG1 | THR | 555 | 23.036-112.767 | 39.279 | 1.00 | 0.00 |
| O    |      |     |     |     |                |        |      |      |
| ATOM | 9160 | C   | THR | 555 | 22.297-114.619 | 41.628 | 1.00 | 0.00 |
| C    |      |     |     |     |                |        |      |      |
| ATOM | 9161 | O   | THR | 555 | 22.184-115.830 | 41.382 | 1.00 | 0.00 |
| O    |      |     |     |     |                |        |      |      |
| ATOM | 9162 | N   | LYS | 556 | 23.220-114.188 | 42.489 | 1.00 | 0.00 |
| N    |      |     |     |     |                |        |      |      |
| ATOM | 9163 | CA  | LYS | 556 | 24.182-115.120 | 43.239 | 1.00 | 0.00 |
| C    |      |     |     |     |                |        |      |      |
| ATOM | 9164 | CB  | LYS | 556 | 25.462-115.274 | 42.487 | 1.00 | 0.00 |
| C    |      |     |     |     |                |        |      |      |
| ATOM | 9165 | CG  | LYS | 556 | 26.414-114.095 | 42.261 | 1.00 | 0.00 |
| C    |      |     |     |     |                |        |      |      |
| ATOM | 9166 | CD  | LYS | 556 | 27.632-114.571 | 41.355 | 1.00 | 0.00 |
| C    |      |     |     |     |                |        |      |      |
| ATOM | 9167 | CE  | LYS | 556 | 28.608-113.489 | 41.070 | 1.00 | 0.00 |
| C    |      |     |     |     |                |        |      |      |
| ATOM | 9168 | NZ  | LYS | 556 | 27.981-112.319 | 40.435 | 1.00 | 0.00 |
| N1+  |      |     |     |     |                |        |      |      |
| ATOM | 9169 | C   | LYS | 556 | 24.528-114.593 | 44.657 | 1.00 | 0.00 |
| C    |      |     |     |     |                |        |      |      |
| ATOM | 9170 | O   | LYS | 556 | 24.498-113.401 | 44.975 | 1.00 | 0.00 |
| O    |      |     |     |     |                |        |      |      |

|      |      |     |     |     |                |        |      |      |
|------|------|-----|-----|-----|----------------|--------|------|------|
| ATOM | 9171 | N   | LYS | 557 | 25.009-115.436 | 45.558 | 1.00 | 0.00 |
| N    |      |     |     |     |                |        |      |      |
| ATOM | 9172 | CA  | LYS | 557 | 24.883-115.315 | 47.001 | 1.00 | 0.00 |
| C    |      |     |     |     |                |        |      |      |
| ATOM | 9173 | CB  | LYS | 557 | 25.294-116.678 | 47.591 | 1.00 | 0.00 |
| C    |      |     |     |     |                |        |      |      |
| ATOM | 9174 | CG  | LYS | 557 | 24.270-117.797 | 47.351 | 1.00 | 0.00 |
| C    |      |     |     |     |                |        |      |      |
| ATOM | 9175 | CD  | LYS | 557 | 24.795-119.217 | 47.649 | 1.00 | 0.00 |
| C    |      |     |     |     |                |        |      |      |
| ATOM | 9176 | CE  | LYS | 557 | 25.068-119.492 | 49.131 | 1.00 | 0.00 |
| C    |      |     |     |     |                |        |      |      |
| ATOM | 9177 | NZ  | LYS | 557 | 23.921-119.229 | 49.987 | 1.00 | 0.00 |
| N1+  |      |     |     |     |                |        |      |      |
| ATOM | 9178 | C   | LYS | 557 | 25.890-114.244 | 47.488 | 1.00 | 0.00 |
| C    |      |     |     |     |                |        |      |      |
| ATOM | 9179 | O   | LYS | 557 | 25.601-113.669 | 48.492 | 1.00 | 0.00 |
| O    |      |     |     |     |                |        |      |      |
| ATOM | 9180 | N   | ASP | 558 | 27.004-114.001 | 46.870 | 1.00 | 0.00 |
| N    |      |     |     |     |                |        |      |      |
| ATOM | 9181 | CA  | ASP | 558 | 28.090-113.089 | 47.294 | 1.00 | 0.00 |
| C    |      |     |     |     |                |        |      |      |
| ATOM | 9182 | CB  | ASP | 558 | 29.346-113.626 | 46.752 | 1.00 | 0.00 |
| C    |      |     |     |     |                |        |      |      |
| ATOM | 9183 | CG  | ASP | 558 | 29.700-115.054 | 47.186 | 1.00 | 0.00 |
| C    |      |     |     |     |                |        |      |      |
| ATOM | 9184 | OD1 | ASP | 558 | 30.047-115.934 | 46.390 | 1.00 | 0.00 |
| O    |      |     |     |     |                |        |      |      |
| ATOM | 9185 | OD2 | ASP | 558 | 29.864-115.234 | 48.430 | 1.00 | 0.00 |
| O1-  |      |     |     |     |                |        |      |      |
| ATOM | 9186 | C   | ASP | 558 | 27.920-111.594 | 46.959 | 1.00 | 0.00 |
| C    |      |     |     |     |                |        |      |      |
| ATOM | 9187 | O   | ASP | 558 | 28.696-110.733 | 47.304 | 1.00 | 0.00 |
| O    |      |     |     |     |                |        |      |      |
| ATOM | 9188 | N   | MET | 559 | 26.751-111.285 | 46.307 | 1.00 | 0.00 |
| N    |      |     |     |     |                |        |      |      |
| ATOM | 9189 | CA  | MET | 559 | 26.306-109.939 | 45.990 | 1.00 | 0.00 |
| C    |      |     |     |     |                |        |      |      |
| ATOM | 9190 | CB  | MET | 559 | 25.252-109.983 | 44.859 | 1.00 | 0.00 |
| C    |      |     |     |     |                |        |      |      |
| ATOM | 9191 | CG  | MET | 559 | 25.736-110.683 | 43.560 | 1.00 | 0.00 |
| C    |      |     |     |     |                |        |      |      |
| ATOM | 9192 | SD  | MET | 559 | 24.862-110.240 | 41.986 | 1.00 | 0.00 |
| S    |      |     |     |     |                |        |      |      |
| ATOM | 9193 | CE  | MET | 559 | 25.554-108.568 | 41.602 | 1.00 | 0.00 |
| C    |      |     |     |     |                |        |      |      |
| ATOM | 9194 | C   | MET | 559 | 25.661-109.241 | 47.250 | 1.00 | 0.00 |
| C    |      |     |     |     |                |        |      |      |
| ATOM | 9195 | O   | MET | 559 | 24.698-109.771 | 47.832 | 1.00 | 0.00 |
| O    |      |     |     |     |                |        |      |      |
| ATOM | 9196 | N   | SER | 560 | 26.124-108.025 | 47.635 | 1.00 | 0.00 |
| N    |      |     |     |     |                |        |      |      |
| ATOM | 9197 | CA  | SER | 560 | 25.471-107.174 | 48.626 | 1.00 | 0.00 |
| C    |      |     |     |     |                |        |      |      |



|      |      |     |     |     |                |        |      |      |
|------|------|-----|-----|-----|----------------|--------|------|------|
| ATOM | 9198 | CB  | SER | 560 | 26.344-107.007 | 49.787 | 1.00 | 0.00 |
| C    |      |     |     |     |                |        |      |      |
| ATOM | 9199 | OG  | SER | 560 | 25.839-106.218 | 50.808 | 1.00 | 0.00 |
| O    |      |     |     |     |                |        |      |      |
| ATOM | 9200 | C   | SER | 560 | 25.135-105.771 | 48.003 | 1.00 | 0.00 |
| C    |      |     |     |     |                |        |      |      |
| ATOM | 9201 | O   | SER | 560 | 25.945-105.210 | 47.240 | 1.00 | 0.00 |
| O    |      |     |     |     |                |        |      |      |
| ATOM | 9202 | N   | PRO | 561 | 24.012-105.162 | 48.442 | 1.00 | 0.00 |
| N    |      |     |     |     |                |        |      |      |
| ATOM | 9203 | CD  | PRO | 561 | 23.780-103.831 | 47.917 | 1.00 | 0.00 |
| C    |      |     |     |     |                |        |      |      |
| ATOM | 9204 | CG  | PRO | 561 | 22.364-103.468 | 48.473 | 1.00 | 0.00 |
| C    |      |     |     |     |                |        |      |      |
| ATOM | 9205 | CB  | PRO | 561 | 22.117-104.516 | 49.576 | 1.00 | 0.00 |
| C    |      |     |     |     |                |        |      |      |
| ATOM | 9206 | CA  | PRO | 561 | 22.914-105.725 | 49.167 | 1.00 | 0.00 |
| C    |      |     |     |     |                |        |      |      |
| ATOM | 9207 | C   | PRO | 561 | 22.063-106.624 | 48.341 | 1.00 | 0.00 |
| C    |      |     |     |     |                |        |      |      |
| ATOM | 9208 | O   | PRO | 561 | 21.929-106.436 | 47.137 | 1.00 | 0.00 |
| O    |      |     |     |     |                |        |      |      |
| ATOM | 9209 | N   | GLN | 562 | 21.450-107.624 | 48.974 | 1.00 | 0.00 |
| N    |      |     |     |     |                |        |      |      |
| ATOM | 9210 | CA  | GLN | 562 | 20.714-108.693 | 48.285 | 1.00 | 0.00 |
| C    |      |     |     |     |                |        |      |      |
| ATOM | 9211 | CB  | GLN | 562 | 20.419-109.902 | 49.171 | 1.00 | 0.00 |
| C    |      |     |     |     |                |        |      |      |
| ATOM | 9212 | CG  | GLN | 562 | 21.675-110.755 | 49.505 | 1.00 | 0.00 |
| C    |      |     |     |     |                |        |      |      |
| ATOM | 9213 | CD  | GLN | 562 | 21.880-111.889 | 48.550 | 1.00 | 0.00 |
| C    |      |     |     |     |                |        |      |      |
| ATOM | 9214 | OE1 | GLN | 562 | 21.006-112.737 | 48.402 | 1.00 | 0.00 |
| O    |      |     |     |     |                |        |      |      |
| ATOM | 9215 | NE2 | GLN | 562 | 22.975-111.955 | 47.866 | 1.00 | 0.00 |
| N    |      |     |     |     |                |        |      |      |
| ATOM | 9216 | C   | GLN | 562 | 19.387-108.290 | 47.640 | 1.00 | 0.00 |
| C    |      |     |     |     |                |        |      |      |
| ATOM | 9217 | O   | GLN | 562 | 19.067-108.735 | 46.554 | 1.00 | 0.00 |
| O    |      |     |     |     |                |        |      |      |
| ATOM | 9218 | N   | LYS | 563 | 18.736-107.346 | 48.359 | 1.00 | 0.00 |
| N    |      |     |     |     |                |        |      |      |
| ATOM | 9219 | CA  | LYS | 563 | 17.634-106.520 | 47.804 | 1.00 | 0.00 |
| C    |      |     |     |     |                |        |      |      |
| ATOM | 9220 | CB  | LYS | 563 | 16.284-107.097 | 48.282 | 1.00 | 0.00 |
| C    |      |     |     |     |                |        |      |      |
| ATOM | 9221 | CG  | LYS | 563 | 15.801-108.454 | 47.689 | 1.00 | 0.00 |
| C    |      |     |     |     |                |        |      |      |
| ATOM | 9222 | CD  | LYS | 563 | 16.202-109.683 | 48.608 | 1.00 | 0.00 |
| C    |      |     |     |     |                |        |      |      |
| ATOM | 9223 | CE  | LYS | 563 | 15.630-111.067 | 48.107 | 1.00 | 0.00 |
| C    |      |     |     |     |                |        |      |      |
| ATOM | 9224 | NZ  | LYS | 563 | 15.596-112.137 | 49.125 | 1.00 | 0.00 |
| N1+  |      |     |     |     |                |        |      |      |

|      |      |     |     |     |                |        |      |      |
|------|------|-----|-----|-----|----------------|--------|------|------|
| ATOM | 9225 | C   | LYS | 563 | 17.703-105.057 | 48.156 | 1.00 | 0.00 |
| C    |      |     |     |     |                |        |      |      |
| ATOM | 9226 | O   | LYS | 563 | 18.105-104.647 | 49.257 | 1.00 | 0.00 |
| O    |      |     |     |     |                |        |      |      |
| ATOM | 9227 | N   | PHE | 564 | 17.175-104.234 | 47.267 | 1.00 | 0.00 |
| N    |      |     |     |     |                |        |      |      |
| ATOM | 9228 | CA  | PHE | 564 | 17.090-102.809 | 47.407 | 1.00 | 0.00 |
| C    |      |     |     |     |                |        |      |      |
| ATOM | 9229 | CB  | PHE | 564 | 18.475-102.180 | 47.150 | 1.00 | 0.00 |
| C    |      |     |     |     |                |        |      |      |
| ATOM | 9230 | CG  | PHE | 564 | 19.002-102.213 | 45.680 | 1.00 | 0.00 |
| C    |      |     |     |     |                |        |      |      |
| ATOM | 9231 | CD1 | PHE | 564 | 18.810-101.166 | 44.785 | 1.00 | 0.00 |
| C    |      |     |     |     |                |        |      |      |
| ATOM | 9232 | CE1 | PHE | 564 | 19.276-101.275 | 43.442 | 1.00 | 0.00 |
| C    |      |     |     |     |                |        |      |      |
| ATOM | 9233 | CZ  | PHE | 564 | 19.916-102.448 | 42.985 | 1.00 | 0.00 |
| C    |      |     |     |     |                |        |      |      |
| ATOM | 9234 | CE2 | PHE | 564 | 20.110-103.521 | 43.885 | 1.00 | 0.00 |
| C    |      |     |     |     |                |        |      |      |
| ATOM | 9235 | CD2 | PHE | 564 | 19.641-103.384 | 45.204 | 1.00 | 0.00 |
| C    |      |     |     |     |                |        |      |      |
| ATOM | 9236 | C   | PHE | 564 | 16.077-102.328 | 46.360 | 1.00 | 0.00 |
| C    |      |     |     |     |                |        |      |      |
| ATOM | 9237 | O   | PHE | 564 | 15.712-103.020 | 45.399 | 1.00 | 0.00 |
| O    |      |     |     |     |                |        |      |      |
| ATOM | 9238 | N   | TRP | 565 | 15.768-101.023 | 46.460 | 1.00 | 0.00 |
| N    |      |     |     |     |                |        |      |      |
| ATOM | 9239 | CA  | TRP | 565 | 14.823-100.323 | 45.594 | 1.00 | 0.00 |
| C    |      |     |     |     |                |        |      |      |
| ATOM | 9240 | CB  | TRP | 565 | 13.631 -99.739 | 46.366 | 1.00 | 0.00 |
| C    |      |     |     |     |                |        |      |      |
| ATOM | 9241 | CG  | TRP | 565 | 12.772-100.771 | 46.967 | 1.00 | 0.00 |
| C    |      |     |     |     |                |        |      |      |
| ATOM | 9242 | CD1 | TRP | 565 | 11.528-101.045 | 46.491 | 1.00 | 0.00 |
| C    |      |     |     |     |                |        |      |      |
| ATOM | 9243 | NE1 | TRP | 565 | 10.941-101.999 | 47.278 | 1.00 | 0.00 |
| N    |      |     |     |     |                |        |      |      |
| ATOM | 9244 | CE2 | TRP | 565 | 11.720-102.397 | 48.315 | 1.00 | 0.00 |
| C    |      |     |     |     |                |        |      |      |
| ATOM | 9245 | CZ2 | TRP | 565 | 11.506-103.252 | 49.386 | 1.00 | 0.00 |
| C    |      |     |     |     |                |        |      |      |
| ATOM | 9246 | CH2 | TRP | 565 | 12.615-103.500 | 50.297 | 1.00 | 0.00 |
| C    |      |     |     |     |                |        |      |      |
| ATOM | 9247 | CZ3 | TRP | 565 | 13.720-102.660 | 50.256 | 1.00 | 0.00 |
| C    |      |     |     |     |                |        |      |      |
| ATOM | 9248 | CE3 | TRP | 565 | 13.817-101.749 | 49.219 | 1.00 | 0.00 |
| C    |      |     |     |     |                |        |      |      |
| ATOM | 9249 | CD2 | TRP | 565 | 12.875-101.643 | 48.158 | 1.00 | 0.00 |
| C    |      |     |     |     |                |        |      |      |
| ATOM | 9250 | C   | TRP | 565 | 15.528 -99.363 | 44.702 | 1.00 | 0.00 |
| C    |      |     |     |     |                |        |      |      |
| ATOM | 9251 | O   | TRP | 565 | 16.572 -98.748 | 45.016 | 1.00 | 0.00 |
| O    |      |     |     |     |                |        |      |      |

|      |      |     |     |     |        |         |        |      |      |
|------|------|-----|-----|-----|--------|---------|--------|------|------|
| ATOM | 9252 | N   | GLY | 566 | 15.014 | -99.244 | 43.488 | 1.00 | 0.00 |
| N    |      |     |     |     |        |         |        |      |      |
| ATOM | 9253 | CA  | GLY | 566 | 15.282 | -98.155 | 42.572 | 1.00 | 0.00 |
| C    |      |     |     |     |        |         |        |      |      |
| ATOM | 9254 | C   | GLY | 566 | 13.966 | -97.406 | 42.270 | 1.00 | 0.00 |
| C    |      |     |     |     |        |         |        |      |      |
| ATOM | 9255 | O   | GLY | 566 | 13.078 | -97.917 | 41.587 | 1.00 | 0.00 |
| O    |      |     |     |     |        |         |        |      |      |
| ATOM | 9256 | N   | LEU | 567 | 13.876 | -96.187 | 42.861 | 1.00 | 0.00 |
| N    |      |     |     |     |        |         |        |      |      |
| ATOM | 9257 | CA  | LEU | 567 | 12.646 | -95.416 | 42.733 | 1.00 | 0.00 |
| C    |      |     |     |     |        |         |        |      |      |
| ATOM | 9258 | CB  | LEU | 567 | 12.417 | -94.927 | 44.187 | 1.00 | 0.00 |
| C    |      |     |     |     |        |         |        |      |      |
| ATOM | 9259 | CG  | LEU | 567 | 12.399 | -95.914 | 45.259 | 1.00 | 0.00 |
| C    |      |     |     |     |        |         |        |      |      |
| ATOM | 9260 | CD1 | LEU | 567 | 12.239 | -95.072 | 46.608 | 1.00 | 0.00 |
| C    |      |     |     |     |        |         |        |      |      |
| ATOM | 9261 | CD2 | LEU | 567 | 11.346 | -97.018 | 45.122 | 1.00 | 0.00 |
| C    |      |     |     |     |        |         |        |      |      |
| ATOM | 9262 | C   | LEU | 567 | 12.754 | -94.251 | 41.686 | 1.00 | 0.00 |
| C    |      |     |     |     |        |         |        |      |      |
| ATOM | 9263 | O   | LEU | 567 | 13.889 | -93.801 | 41.503 | 1.00 | 0.00 |
| O    |      |     |     |     |        |         |        |      |      |
| ATOM | 9264 | N   | THR | 568 | 11.682 | -93.797 | 40.959 | 1.00 | 0.00 |
| N    |      |     |     |     |        |         |        |      |      |
| ATOM | 9265 | CA  | THR | 568 | 11.853 | -92.737 | 39.853 | 1.00 | 0.00 |
| C    |      |     |     |     |        |         |        |      |      |
| ATOM | 9266 | CB  | THR | 568 | 11.156 | -93.011 | 38.506 | 1.00 | 0.00 |
| C    |      |     |     |     |        |         |        |      |      |
| ATOM | 9267 | CG2 | THR | 568 | 9.569  | -93.128 | 38.503 | 1.00 | 0.00 |
| C    |      |     |     |     |        |         |        |      |      |
| ATOM | 9268 | OG1 | THR | 568 | 11.473 | -91.843 | 37.709 | 1.00 | 0.00 |
| O    |      |     |     |     |        |         |        |      |      |
| ATOM | 9269 | C   | THR | 568 | 11.463 | -91.399 | 40.445 | 1.00 | 0.00 |
| C    |      |     |     |     |        |         |        |      |      |
| ATOM | 9270 | O   | THR | 568 | 10.360 | -91.220 | 40.952 | 1.00 | 0.00 |
| O    |      |     |     |     |        |         |        |      |      |
| ATOM | 9271 | N   | ARG | 569 | 12.192 | -90.339 | 40.091 | 1.00 | 0.00 |
| N    |      |     |     |     |        |         |        |      |      |
| ATOM | 9272 | CA  | ARG | 569 | 11.947 | -88.930 | 40.408 | 1.00 | 0.00 |
| C    |      |     |     |     |        |         |        |      |      |
| ATOM | 9273 | CB  | ARG | 569 | 13.159 | -88.124 | 39.997 | 1.00 | 0.00 |
| C    |      |     |     |     |        |         |        |      |      |
| ATOM | 9274 | CG  | ARG | 569 | 13.485 | -86.958 | 40.889 | 1.00 | 0.00 |
| C    |      |     |     |     |        |         |        |      |      |
| ATOM | 9275 | CD  | ARG | 569 | 14.627 | -86.038 | 40.461 | 1.00 | 0.00 |
| C    |      |     |     |     |        |         |        |      |      |
| ATOM | 9276 | NE  | ARG | 569 | 14.531 | -85.605 | 39.042 | 1.00 | 0.00 |
| N    |      |     |     |     |        |         |        |      |      |
| ATOM | 9277 | CZ  | ARG | 569 | 13.723 | -84.693 | 38.515 | 1.00 | 0.00 |
| C    |      |     |     |     |        |         |        |      |      |
| ATOM | 9278 | NH1 | ARG | 569 | 13.933 | -84.330 | 37.288 | 1.00 | 0.00 |
| N    |      |     |     |     |        |         |        |      |      |

|      |      |     |     |     |        |         |        |      |      |
|------|------|-----|-----|-----|--------|---------|--------|------|------|
| ATOM | 9279 | NH2 | ARG | 569 | 12.698 | -84.124 | 39.154 | 1.00 | 0.00 |
| N1+  |      |     |     |     |        |         |        |      |      |
| ATOM | 9280 | C   | ARG | 569 | 10.647 | -88.398 | 39.737 | 1.00 | 0.00 |
| C    |      |     |     |     |        |         |        |      |      |
| ATOM | 9281 | O   | ARG | 569 | 9.996  | -87.418 | 40.173 | 1.00 | 0.00 |
| O    |      |     |     |     |        |         |        |      |      |
| ATOM | 9282 | N   | SER | 570 | 10.214 | -89.041 | 38.710 | 1.00 | 0.00 |
| N    |      |     |     |     |        |         |        |      |      |
| ATOM | 9283 | CA  | SER | 570 | 8.904  | -88.835 | 38.095 | 1.00 | 0.00 |
| C    |      |     |     |     |        |         |        |      |      |
| ATOM | 9284 | CB  | SER | 570 | 8.891  | -89.603 | 36.725 | 1.00 | 0.00 |
| C    |      |     |     |     |        |         |        |      |      |
| ATOM | 9285 | OG  | SER | 570 | 7.577  | -89.556 | 36.184 | 1.00 | 0.00 |
| O    |      |     |     |     |        |         |        |      |      |
| ATOM | 9286 | C   | SER | 570 | 7.729  | -89.121 | 39.115 | 1.00 | 0.00 |
| C    |      |     |     |     |        |         |        |      |      |
| ATOM | 9287 | O   | SER | 570 | 6.665  | -88.503 | 38.945 | 1.00 | 0.00 |
| O    |      |     |     |     |        |         |        |      |      |
| ATOM | 9288 | N   | ALA | 571 | 7.900  | -90.018 | 40.077 | 1.00 | 0.00 |
| N    |      |     |     |     |        |         |        |      |      |
| ATOM | 9289 | CA  | ALA | 571 | 6.778  | -90.574 | 40.851 | 1.00 | 0.00 |
| C    |      |     |     |     |        |         |        |      |      |
| ATOM | 9290 | CB  | ALA | 571 | 6.762  | -92.088 | 40.591 | 1.00 | 0.00 |
| C    |      |     |     |     |        |         |        |      |      |
| ATOM | 9291 | C   | ALA | 571 | 6.913  | -90.332 | 42.313 | 1.00 | 0.00 |
| C    |      |     |     |     |        |         |        |      |      |
| ATOM | 9292 | O   | ALA | 571 | 5.907  | -90.077 | 42.975 | 1.00 | 0.00 |
| O    |      |     |     |     |        |         |        |      |      |
| ATOM | 9293 | N   | LEU | 572 | 8.149  | -90.285 | 42.843 | 1.00 | 0.00 |
| N    |      |     |     |     |        |         |        |      |      |
| ATOM | 9294 | CA  | LEU | 572 | 8.413  | -89.766 | 44.217 | 1.00 | 0.00 |
| C    |      |     |     |     |        |         |        |      |      |
| ATOM | 9295 | CB  | LEU | 572 | 9.923  | -89.855 | 44.517 | 1.00 | 0.00 |
| C    |      |     |     |     |        |         |        |      |      |
| ATOM | 9296 | CG  | LEU | 572 | 10.370 | -91.276 | 44.773 | 1.00 | 0.00 |
| C    |      |     |     |     |        |         |        |      |      |
| ATOM | 9297 | CD1 | LEU | 572 | 11.939 | -91.310 | 44.986 | 1.00 | 0.00 |
| C    |      |     |     |     |        |         |        |      |      |
| ATOM | 9298 | CD2 | LEU | 572 | 9.555  | -91.871 | 45.953 | 1.00 | 0.00 |
| C    |      |     |     |     |        |         |        |      |      |
| ATOM | 9299 | C   | LEU | 572 | 8.007  | -88.241 | 44.387 | 1.00 | 0.00 |
| C    |      |     |     |     |        |         |        |      |      |
| ATOM | 9300 | O   | LEU | 572 | 7.945  | -87.478 | 43.426 | 1.00 | 0.00 |
| O    |      |     |     |     |        |         |        |      |      |
| ATOM | 9301 | N   | LEU | 573 | 7.866  | -87.706 | 45.637 | 1.00 | 0.00 |
| N    |      |     |     |     |        |         |        |      |      |
| ATOM | 9302 | CA  | LEU | 573 | 7.669  | -86.270 | 45.925 | 1.00 | 0.00 |
| C    |      |     |     |     |        |         |        |      |      |
| ATOM | 9303 | CB  | LEU | 573 | 6.136  | -86.043 | 45.796 | 1.00 | 0.00 |
| C    |      |     |     |     |        |         |        |      |      |
| ATOM | 9304 | CG  | LEU | 573 | 5.698  | -84.625 | 46.169 | 1.00 | 0.00 |
| C    |      |     |     |     |        |         |        |      |      |
| ATOM | 9305 | CD1 | LEU | 573 | 5.955  | -83.598 | 45.086 | 1.00 | 0.00 |
| C    |      |     |     |     |        |         |        |      |      |

|      |      |     |     |     |        |         |        |      |      |
|------|------|-----|-----|-----|--------|---------|--------|------|------|
| ATOM | 9306 | CD2 | LEU | 573 | 4.203  | -84.531 | 46.342 | 1.00 | 0.00 |
| C    |      |     |     |     |        |         |        |      |      |
| ATOM | 9307 | C   | LEU | 573 | 8.259  | -85.821 | 47.273 | 1.00 | 0.00 |
| C    |      |     |     |     |        |         |        |      |      |
| ATOM | 9308 | O   | LEU | 573 | 7.753  | -86.257 | 48.349 | 1.00 | 0.00 |
| O    |      |     |     |     |        |         |        |      |      |
| ATOM | 9309 | N   | PRO | 574 | 9.219  | -84.803 | 47.346 | 1.00 | 0.00 |
| N    |      |     |     |     |        |         |        |      |      |
| ATOM | 9310 | CD  | PRO | 574 | 9.998  | -84.371 | 46.170 | 1.00 | 0.00 |
| C    |      |     |     |     |        |         |        |      |      |
| ATOM | 9311 | CG  | PRO | 574 | 11.198 | -83.743 | 46.740 | 1.00 | 0.00 |
| C    |      |     |     |     |        |         |        |      |      |
| ATOM | 9312 | CB  | PRO | 574 | 10.780 | -83.242 | 48.103 | 1.00 | 0.00 |
| C    |      |     |     |     |        |         |        |      |      |
| ATOM | 9313 | CA  | PRO | 574 | 9.652  | -84.226 | 48.590 | 1.00 | 0.00 |
| C    |      |     |     |     |        |         |        |      |      |
| ATOM | 9314 | C   | PRO | 574 | 8.518  | -83.471 | 49.303 | 1.00 | 0.00 |
| C    |      |     |     |     |        |         |        |      |      |
| ATOM | 9315 | O   | PRO | 574 | 7.832  | -82.581 | 48.709 | 1.00 | 0.00 |
| O    |      |     |     |     |        |         |        |      |      |
| ATOM | 9316 | N   | THR | 575 | 8.277  | -83.768 | 50.595 | 1.00 | 0.00 |
| N    |      |     |     |     |        |         |        |      |      |
| ATOM | 9317 | CA  | THR | 575 | 7.222  | -82.978 | 51.408 | 1.00 | 0.00 |
| C    |      |     |     |     |        |         |        |      |      |
| ATOM | 9318 | CB  | THR | 575 | 6.100  | -84.017 | 51.823 | 1.00 | 0.00 |
| C    |      |     |     |     |        |         |        |      |      |
| ATOM | 9319 | CG2 | THR | 575 | 5.159  | -84.530 | 50.762 | 1.00 | 0.00 |
| C    |      |     |     |     |        |         |        |      |      |
| ATOM | 9320 | OG1 | THR | 575 | 6.660  | -85.153 | 52.510 | 1.00 | 0.00 |
| O    |      |     |     |     |        |         |        |      |      |
| ATOM | 9321 | C   | THR | 575 | 7.712  | -82.283 | 52.684 | 1.00 | 0.00 |
| C    |      |     |     |     |        |         |        |      |      |
| ATOM | 9322 | O   | THR | 575 | 8.878  | -82.513 | 53.102 | 1.00 | 0.00 |
| O    |      |     |     |     |        |         |        |      |      |
| ATOM | 9323 | N   | ILE | 576 | 6.863  | -81.529 | 53.381 | 1.00 | 0.00 |
| N    |      |     |     |     |        |         |        |      |      |
| ATOM | 9324 | CA  | ILE | 576 | 7.280  | -80.805 | 54.626 | 1.00 | 0.00 |
| C    |      |     |     |     |        |         |        |      |      |
| ATOM | 9325 | CB  | ILE | 576 | 6.162  | -79.801 | 54.973 | 1.00 | 0.00 |
| C    |      |     |     |     |        |         |        |      |      |
| ATOM | 9326 | CG2 | ILE | 576 | 6.244  | -79.219 | 56.291 | 1.00 | 0.00 |
| C    |      |     |     |     |        |         |        |      |      |
| ATOM | 9327 | CG1 | ILE | 576 | 6.277  | -78.622 | 53.996 | 1.00 | 0.00 |
| C    |      |     |     |     |        |         |        |      |      |
| ATOM | 9328 | CD1 | ILE | 576 | 5.413  | -77.341 | 54.198 | 1.00 | 0.00 |
| C    |      |     |     |     |        |         |        |      |      |
| ATOM | 9329 | C   | ILE | 576 | 7.629  | -81.844 | 55.663 | 1.00 | 0.00 |
| C    |      |     |     |     |        |         |        |      |      |
| ATOM | 9330 | O   | ILE | 576 | 6.646  | -82.566 | 56.098 | 1.00 | 0.00 |
| O    |      |     |     |     |        |         |        |      |      |
| ATOM | 9331 | N   | PRO | 577 | 8.817  | -81.868 | 56.241 | 1.00 | 0.00 |
| N    |      |     |     |     |        |         |        |      |      |
| ATOM | 9332 | CD  | PRO | 577 | 10.079 | -81.287 | 55.848 | 1.00 | 0.00 |
| C    |      |     |     |     |        |         |        |      |      |

|      |      |     |     |     |        |         |        |      |      |
|------|------|-----|-----|-----|--------|---------|--------|------|------|
| ATOM | 9333 | CG  | PRO | 577 | 11.105 | -81.564 | 56.964 | 1.00 | 0.00 |
| C    |      |     |     |     |        |         |        |      |      |
| ATOM | 9334 | CB  | PRO | 577 | 10.635 | -82.865 | 57.508 | 1.00 | 0.00 |
| C    |      |     |     |     |        |         |        |      |      |
| ATOM | 9335 | CA  | PRO | 577 | 9.097  | -82.862 | 57.338 | 1.00 | 0.00 |
| C    |      |     |     |     |        |         |        |      |      |
| ATOM | 9336 | C   | PRO | 577 | 8.288  | -82.689 | 58.632 | 1.00 | 0.00 |
| C    |      |     |     |     |        |         |        |      |      |
| ATOM | 9337 | O   | PRO | 577 | 8.152  | -81.535 | 59.093 | 1.00 | 0.00 |
| O    |      |     |     |     |        |         |        |      |      |
| ATOM | 9338 | N   | ASP | 578 | 7.970  | -83.845 | 59.260 | 1.00 | 0.00 |
| N    |      |     |     |     |        |         |        |      |      |
| ATOM | 9339 | CA  | ASP | 578 | 7.507  | -83.947 | 60.657 | 1.00 | 0.00 |
| C    |      |     |     |     |        |         |        |      |      |
| ATOM | 9340 | CB  | ASP | 578 | 6.690  | -85.283 | 60.781 | 1.00 | 0.00 |
| C    |      |     |     |     |        |         |        |      |      |
| ATOM | 9341 | CG  | ASP | 578 | 5.251  | -85.081 | 60.240 | 1.00 | 0.00 |
| C    |      |     |     |     |        |         |        |      |      |
| ATOM | 9342 | OD1 | ASP | 578 | 5.006  | -85.424 | 59.064 | 1.00 | 0.00 |
| O    |      |     |     |     |        |         |        |      |      |
| ATOM | 9343 | OD2 | ASP | 578 | 4.389  | -84.344 | 60.848 | 1.00 | 0.00 |
| O1-  |      |     |     |     |        |         |        |      |      |
| ATOM | 9344 | C   | ASP | 578 | 8.648  | -84.009 | 61.642 | 1.00 | 0.00 |
| C    |      |     |     |     |        |         |        |      |      |
| ATOM | 9345 | O   | ASP | 578 | 8.523  | -83.521 | 62.806 | 1.00 | 0.00 |
| O    |      |     |     |     |        |         |        |      |      |
| ATOM | 9346 | N   | THR | 579 | 9.728  | -84.558 | 61.146 | 1.00 | 0.00 |
| N    |      |     |     |     |        |         |        |      |      |
| ATOM | 9347 | CA  | THR | 579 | 10.983 | -84.614 | 61.956 | 1.00 | 0.00 |
| C    |      |     |     |     |        |         |        |      |      |
| ATOM | 9348 | CB  | THR | 579 | 12.056 | -85.261 | 61.067 | 1.00 | 0.00 |
| C    |      |     |     |     |        |         |        |      |      |
| ATOM | 9349 | CG2 | THR | 579 | 13.434 | -85.392 | 61.709 | 1.00 | 0.00 |
| C    |      |     |     |     |        |         |        |      |      |
| ATOM | 9350 | OG1 | THR | 579 | 11.648 | -86.617 | 60.695 | 1.00 | 0.00 |
| O    |      |     |     |     |        |         |        |      |      |
| ATOM | 9351 | C   | THR | 579 | 11.546 | -83.243 | 62.397 | 1.00 | 0.00 |
| C    |      |     |     |     |        |         |        |      |      |
| ATOM | 9352 | O   | THR | 579 | 11.877 | -82.409 | 61.560 | 1.00 | 0.00 |
| O    |      |     |     |     |        |         |        |      |      |
| ATOM | 9353 | N   | GLU | 580 | 11.697 | -83.020 | 63.646 | 1.00 | 0.00 |
| N    |      |     |     |     |        |         |        |      |      |
| ATOM | 9354 | CA  | GLU | 580 | 12.080 | -81.708 | 64.295 | 1.00 | 0.00 |
| C    |      |     |     |     |        |         |        |      |      |
| ATOM | 9355 | CB  | GLU | 580 | 12.111 | -81.861 | 65.785 | 1.00 | 0.00 |
| C    |      |     |     |     |        |         |        |      |      |
| ATOM | 9356 | CG  | GLU | 580 | 12.538 | -80.694 | 66.684 | 1.00 | 0.00 |
| C    |      |     |     |     |        |         |        |      |      |
| ATOM | 9357 | CD  | GLU | 580 | 11.806 | -79.336 | 66.344 | 1.00 | 0.00 |
| C    |      |     |     |     |        |         |        |      |      |
| ATOM | 9358 | OE1 | GLU | 580 | 10.641 | -79.250 | 65.850 | 1.00 | 0.00 |
| O    |      |     |     |     |        |         |        |      |      |
| ATOM | 9359 | OE2 | GLU | 580 | 12.458 | -78.224 | 66.451 | 1.00 | 0.00 |
| O1-  |      |     |     |     |        |         |        |      |      |

|      |      |     |     |     |        |         |        |      |      |
|------|------|-----|-----|-----|--------|---------|--------|------|------|
| ATOM | 9360 | C   | GLU | 580 | 13.362 | -80.980 | 63.803 | 1.00 | 0.00 |
| C    |      |     |     |     |        |         |        |      |      |
| ATOM | 9361 | O   | GLU | 580 | 13.296 | -79.791 | 63.409 | 1.00 | 0.00 |
| O    |      |     |     |     |        |         |        |      |      |
| ATOM | 9362 | N   | ASP | 581 | 14.519 | -81.658 | 63.777 | 1.00 | 0.00 |
| N    |      |     |     |     |        |         |        |      |      |
| ATOM | 9363 | CA  | ASP | 581 | 15.766 | -81.030 | 63.310 | 1.00 | 0.00 |
| C    |      |     |     |     |        |         |        |      |      |
| ATOM | 9364 | CB  | ASP | 581 | 17.028 | -81.807 | 63.746 | 1.00 | 0.00 |
| C    |      |     |     |     |        |         |        |      |      |
| ATOM | 9365 | CG  | ASP | 581 | 17.167 | -81.972 | 65.310 | 1.00 | 0.00 |
| C    |      |     |     |     |        |         |        |      |      |
| ATOM | 9366 | OD1 | ASP | 581 | 18.339 | -82.238 | 65.716 | 1.00 | 0.00 |
| O    |      |     |     |     |        |         |        |      |      |
| ATOM | 9367 | OD2 | ASP | 581 | 16.224 | -81.844 | 66.131 | 1.00 | 0.00 |
| O1-  |      |     |     |     |        |         |        |      |      |
| ATOM | 9368 | C   | ASP | 581 | 15.905 | -80.569 | 61.882 | 1.00 | 0.00 |
| C    |      |     |     |     |        |         |        |      |      |
| ATOM | 9369 | O   | ASP | 581 | 16.951 | -80.048 | 61.504 | 1.00 | 0.00 |
| O    |      |     |     |     |        |         |        |      |      |
| ATOM | 9370 | N   | GLU | 582 | 14.836 | -80.782 | 61.091 | 1.00 | 0.00 |
| N    |      |     |     |     |        |         |        |      |      |
| ATOM | 9371 | CA  | GLU | 582 | 14.844 | -80.543 | 59.602 | 1.00 | 0.00 |
| C    |      |     |     |     |        |         |        |      |      |
| ATOM | 9372 | CB  | GLU | 582 | 14.164 | -81.693 | 58.923 | 1.00 | 0.00 |
| C    |      |     |     |     |        |         |        |      |      |
| ATOM | 9373 | CG  | GLU | 582 | 14.754 | -83.048 | 59.204 | 1.00 | 0.00 |
| C    |      |     |     |     |        |         |        |      |      |
| ATOM | 9374 | CD  | GLU | 582 | 16.342 | -83.125 | 59.072 | 1.00 | 0.00 |
| C    |      |     |     |     |        |         |        |      |      |
| ATOM | 9375 | OE1 | GLU | 582 | 16.938 | -82.570 | 58.142 | 1.00 | 0.00 |
| O    |      |     |     |     |        |         |        |      |      |
| ATOM | 9376 | OE2 | GLU | 582 | 16.901 | -83.994 | 59.789 | 1.00 | 0.00 |
| O1-  |      |     |     |     |        |         |        |      |      |
| ATOM | 9377 | C   | GLU | 582 | 14.110 | -79.169 | 59.407 | 1.00 | 0.00 |
| C    |      |     |     |     |        |         |        |      |      |
| ATOM | 9378 | O   | GLU | 582 | 13.297 | -78.810 | 60.297 | 1.00 | 0.00 |
| O    |      |     |     |     |        |         |        |      |      |
| ATOM | 9379 | N   | ILE | 583 | 14.420 | -78.465 | 58.343 | 1.00 | 0.00 |
| N    |      |     |     |     |        |         |        |      |      |
| ATOM | 9380 | CA  | ILE | 583 | 13.851 | -77.096 | 58.038 | 1.00 | 0.00 |
| C    |      |     |     |     |        |         |        |      |      |
| ATOM | 9381 | CB  | ILE | 583 | 14.736 | -76.186 | 57.198 | 1.00 | 0.00 |
| C    |      |     |     |     |        |         |        |      |      |
| ATOM | 9382 | CG2 | ILE | 583 | 13.943 | -74.915 | 56.876 | 1.00 | 0.00 |
| C    |      |     |     |     |        |         |        |      |      |
| ATOM | 9383 | CG1 | ILE | 583 | 15.956 | -75.905 | 58.033 | 1.00 | 0.00 |
| C    |      |     |     |     |        |         |        |      |      |
| ATOM | 9384 | CD1 | ILE | 583 | 17.203 | -75.311 | 57.313 | 1.00 | 0.00 |
| C    |      |     |     |     |        |         |        |      |      |
| ATOM | 9385 | C   | ILE | 583 | 12.407 | -77.294 | 57.475 | 1.00 | 0.00 |
| C    |      |     |     |     |        |         |        |      |      |
| ATOM | 9386 | O   | ILE | 583 | 12.239 | -78.107 | 56.590 | 1.00 | 0.00 |
| O    |      |     |     |     |        |         |        |      |      |

|      |      |     |     |     |        |         |        |      |      |
|------|------|-----|-----|-----|--------|---------|--------|------|------|
| ATOM | 9387 | N   | SER | 584 | 11.526 | -76.422 | 57.858 | 1.00 | 0.00 |
| N    |      |     |     |     |        |         |        |      |      |
| ATOM | 9388 | CA  | SER | 584 | 10.153 | -76.253 | 57.363 | 1.00 | 0.00 |
| C    |      |     |     |     |        |         |        |      |      |
| ATOM | 9389 | CB  | SER | 584 | 9.149  | -77.087 | 58.171 | 1.00 | 0.00 |
| C    |      |     |     |     |        |         |        |      |      |
| ATOM | 9390 | OG  | SER | 584 | 9.103  | -76.597 | 59.589 | 1.00 | 0.00 |
| O    |      |     |     |     |        |         |        |      |      |
| ATOM | 9391 | C   | SER | 584 | 9.759  | -74.761 | 57.376 | 1.00 | 0.00 |
| C    |      |     |     |     |        |         |        |      |      |
| ATOM | 9392 | O   | SER | 584 | 10.454 | -74.037 | 58.078 | 1.00 | 0.00 |
| O    |      |     |     |     |        |         |        |      |      |
| ATOM | 9393 | N   | PRO | 585 | 8.671  | -74.297 | 56.712 | 1.00 | 0.00 |
| N    |      |     |     |     |        |         |        |      |      |
| ATOM | 9394 | CD  | PRO | 585 | 7.721  | -75.030 | 55.869 | 1.00 | 0.00 |
| C    |      |     |     |     |        |         |        |      |      |
| ATOM | 9395 | CG  | PRO | 585 | 6.886  | -73.937 | 55.195 | 1.00 | 0.00 |
| C    |      |     |     |     |        |         |        |      |      |
| ATOM | 9396 | CB  | PRO | 585 | 7.905  | -72.809 | 55.017 | 1.00 | 0.00 |
| C    |      |     |     |     |        |         |        |      |      |
| ATOM | 9397 | CA  | PRO | 585 | 8.708  | -72.918 | 56.294 | 1.00 | 0.00 |
| C    |      |     |     |     |        |         |        |      |      |
| ATOM | 9398 | C   | PRO | 585 | 8.184  | -72.024 | 57.463 | 1.00 | 0.00 |
| C    |      |     |     |     |        |         |        |      |      |
| ATOM | 9399 | O   | PRO | 585 | 8.535  | -70.810 | 57.527 | 1.00 | 0.00 |
| O    |      |     |     |     |        |         |        |      |      |
| ATOM | 9400 | N   | ASP | 586 | 7.371  | -72.553 | 58.376 | 1.00 | 0.00 |
| N    |      |     |     |     |        |         |        |      |      |
| ATOM | 9401 | CA  | ASP | 586 | 7.127  | -71.946 | 59.705 | 1.00 | 0.00 |
| C    |      |     |     |     |        |         |        |      |      |
| ATOM | 9402 | CB  | ASP | 586 | 6.010  | -72.760 | 60.325 | 1.00 | 0.00 |
| C    |      |     |     |     |        |         |        |      |      |
| ATOM | 9403 | CG  | ASP | 586 | 6.429  | -74.139 | 60.789 | 1.00 | 0.00 |
| C    |      |     |     |     |        |         |        |      |      |
| ATOM | 9404 | OD1 | ASP | 586 | 7.071  | -74.886 | 59.947 | 1.00 | 0.00 |
| O    |      |     |     |     |        |         |        |      |      |
| ATOM | 9405 | OD2 | ASP | 586 | 5.874  | -74.614 | 61.829 | 1.00 | 0.00 |
| O1-  |      |     |     |     |        |         |        |      |      |
| ATOM | 9406 | C   | ASP | 586 | 8.316  | -71.731 | 60.615 | 1.00 | 0.00 |
| C    |      |     |     |     |        |         |        |      |      |
| ATOM | 9407 | O   | ASP | 586 | 8.128  | -71.297 | 61.733 | 1.00 | 0.00 |
| O    |      |     |     |     |        |         |        |      |      |
| ATOM | 9408 | N   | LYS | 587 | 9.509  | -72.218 | 60.242 | 1.00 | 0.00 |
| N    |      |     |     |     |        |         |        |      |      |
| ATOM | 9409 | CA  | LYS | 587 | 10.702 | -71.936 | 61.025 | 1.00 | 0.00 |
| C    |      |     |     |     |        |         |        |      |      |
| ATOM | 9410 | CB  | LYS | 587 | 11.427 | -73.321 | 61.310 | 1.00 | 0.00 |
| C    |      |     |     |     |        |         |        |      |      |
| ATOM | 9411 | CG  | LYS | 587 | 10.621 | -74.335 | 62.097 | 1.00 | 0.00 |
| C    |      |     |     |     |        |         |        |      |      |
| ATOM | 9412 | CD  | LYS | 587 | 11.363 | -75.751 | 62.175 | 1.00 | 0.00 |
| C    |      |     |     |     |        |         |        |      |      |
| ATOM | 9413 | CE  | LYS | 587 | 10.646 | -76.582 | 63.241 | 1.00 | 0.00 |
| C    |      |     |     |     |        |         |        |      |      |



|      |      |     |     |     |        |         |        |      |      |
|------|------|-----|-----|-----|--------|---------|--------|------|------|
| ATOM | 9414 | NZ  | LYS | 587 | 11.268 | -77.929 | 63.407 | 1.00 | 0.00 |
| N1+  |      |     |     |     |        |         |        |      |      |
| ATOM | 9415 | C   | LYS | 587 | 11.636 | -71.026 | 60.136 | 1.00 | 0.00 |
| C    |      |     |     |     |        |         |        |      |      |
| ATOM | 9416 | O   | LYS | 587 | 11.945 | -69.950 | 60.560 | 1.00 | 0.00 |
| O    |      |     |     |     |        |         |        |      |      |
| ATOM | 9417 | N   | VAL | 588 | 12.140 | -71.489 | 58.930 | 1.00 | 0.00 |
| N    |      |     |     |     |        |         |        |      |      |
| ATOM | 9418 | CA  | VAL | 588 | 12.732 | -70.531 | 57.945 | 1.00 | 0.00 |
| C    |      |     |     |     |        |         |        |      |      |
| ATOM | 9419 | CB  | VAL | 588 | 14.249 | -70.357 | 58.056 | 1.00 | 0.00 |
| C    |      |     |     |     |        |         |        |      |      |
| ATOM | 9420 | CG1 | VAL | 588 | 14.924 | -71.736 | 57.873 | 1.00 | 0.00 |
| C    |      |     |     |     |        |         |        |      |      |
| ATOM | 9421 | CG2 | VAL | 588 | 14.924 | -69.409 | 57.079 | 1.00 | 0.00 |
| C    |      |     |     |     |        |         |        |      |      |
| ATOM | 9422 | C   | VAL | 588 | 12.273 | -70.896 | 56.523 | 1.00 | 0.00 |
| C    |      |     |     |     |        |         |        |      |      |
| ATOM | 9423 | O   | VAL | 588 | 12.219 | -72.111 | 56.188 | 1.00 | 0.00 |
| O    |      |     |     |     |        |         |        |      |      |
| ATOM | 9424 | N   | ILE | 589 | 12.117 | -69.947 | 55.593 | 1.00 | 0.00 |
| N    |      |     |     |     |        |         |        |      |      |
| ATOM | 9425 | CA  | ILE | 589 | 11.921 | -70.152 | 54.105 | 1.00 | 0.00 |
| C    |      |     |     |     |        |         |        |      |      |
| ATOM | 9426 | CB  | ILE | 589 | 10.787 | -69.251 | 53.595 | 1.00 | 0.00 |
| C    |      |     |     |     |        |         |        |      |      |
| ATOM | 9427 | CG2 | ILE | 589 | 10.660 | -69.278 | 52.055 | 1.00 | 0.00 |
| C    |      |     |     |     |        |         |        |      |      |
| ATOM | 9428 | CG1 | ILE | 589 | 9.431  | -69.607 | 54.217 | 1.00 | 0.00 |
| C    |      |     |     |     |        |         |        |      |      |
| ATOM | 9429 | CD1 | ILE | 589 | 8.384  | -68.520 | 54.313 | 1.00 | 0.00 |
| C    |      |     |     |     |        |         |        |      |      |
| ATOM | 9430 | C   | ILE | 589 | 13.198 | -69.902 | 53.343 | 1.00 | 0.00 |
| C    |      |     |     |     |        |         |        |      |      |
| ATOM | 9431 | O   | ILE | 589 | 13.947 | -68.971 | 53.655 | 1.00 | 0.00 |
| O    |      |     |     |     |        |         |        |      |      |
| ATOM | 9432 | N   | LEU | 590 | 13.511 | -70.787 | 52.351 | 1.00 | 0.00 |
| N    |      |     |     |     |        |         |        |      |      |
| ATOM | 9433 | CA  | LEU | 590 | 14.748 | -70.678 | 51.509 | 1.00 | 0.00 |
| C    |      |     |     |     |        |         |        |      |      |
| ATOM | 9434 | CB  | LEU | 590 | 15.729 | -71.768 | 51.943 | 1.00 | 0.00 |
| C    |      |     |     |     |        |         |        |      |      |
| ATOM | 9435 | CG  | LEU | 590 | 15.952 | -72.066 | 53.398 | 1.00 | 0.00 |
| C    |      |     |     |     |        |         |        |      |      |
| ATOM | 9436 | CD1 | LEU | 590 | 16.711 | -73.283 | 53.535 | 1.00 | 0.00 |
| C    |      |     |     |     |        |         |        |      |      |
| ATOM | 9437 | CD2 | LEU | 590 | 16.784 | -70.951 | 54.082 | 1.00 | 0.00 |
| C    |      |     |     |     |        |         |        |      |      |
| ATOM | 9438 | C   | LEU | 590 | 14.595 | -70.531 | 50.024 | 1.00 | 0.00 |
| C    |      |     |     |     |        |         |        |      |      |
| ATOM | 9439 | O   | LEU | 590 | 15.556 | -70.252 | 49.245 | 1.00 | 0.00 |
| O    |      |     |     |     |        |         |        |      |      |
| ATOM | 9440 | N   | CYX | 591 | 13.405 | -70.876 | 49.491 | 1.00 | 0.00 |
| N    |      |     |     |     |        |         |        |      |      |

|        |      |     |     |     |        |          |        |      |      |
|--------|------|-----|-----|-----|--------|----------|--------|------|------|
| ATOM   | 9441 | CA  | CYX | 591 | 13.047 | -70.783  | 48.079 | 1.00 | 0.00 |
| C      |      |     |     |     |        |          |        |      |      |
| ATOM   | 9442 | CB  | CYX | 591 | 12.191 | -72.036  | 47.679 | 1.00 | 0.00 |
| C      |      |     |     |     |        |          |        |      |      |
| ATOM   | 9443 | SG  | CYX | 591 | 12.889 | -73.644  | 47.991 | 1.00 | 0.00 |
| S      |      |     |     |     |        |          |        |      |      |
| ATOM   | 9444 | C   | CYX | 591 | 12.126 | -69.585  | 47.672 | 1.00 | 0.00 |
| C      |      |     |     |     |        |          |        |      |      |
| ATOM   | 9445 | O   | CYX | 591 | 11.309 | -69.246  | 48.496 | 1.00 | 0.00 |
| O      |      |     |     |     |        |          |        |      |      |
| ATOM   | 9446 | N   | LEU | 592 | 12.343 | -69.028  | 46.512 | 1.00 | 0.00 |
| N      |      |     |     |     |        |          |        |      |      |
| ATOM   | 9447 | CA  | LEU | 592 | 12.065 | -67.665  | 46.084 | 1.00 | 0.00 |
| C      |      |     |     |     |        |          |        |      |      |
| ATOM   | 9448 | CB  | LEU | 592 | 13.231 | -66.842  | 46.577 | 1.00 | 0.00 |
| C      |      |     |     |     |        |          |        |      |      |
| ATOM   | 9449 | CG  | LEU | 592 | 13.274 | -65.290  | 46.354 | 1.00 | 0.00 |
| C      |      |     |     |     |        |          |        |      |      |
| ATOM   | 9450 | CD1 | LEU | 592 | 12.278 | -64.670  | 47.298 | 1.00 | 0.00 |
| C      |      |     |     |     |        |          |        |      |      |
| ATOM   | 9451 | CD2 | LEU | 592 | 14.715 | -64.734  | 46.563 | 1.00 | 0.00 |
| C      |      |     |     |     |        |          |        |      |      |
| ATOM   | 9452 | C   | LEU | 592 | 11.897 | -67.556  | 44.538 | 1.00 | 0.00 |
| C      |      |     |     |     |        |          |        |      |      |
| ATOM   | 9453 | O   | LEU | 592 | 10.794 | -67.163  | 44.112 | 1.00 | 0.00 |
| O      |      |     |     |     |        |          |        |      |      |
| ATOM   | 9454 | OXT | LEU | 592 | 12.794 | -68.037  | 43.752 | 1.00 | 0.00 |
| O1-    |      |     |     |     |        |          |        |      |      |
| HETATM | 9455 | ZN  | ZN  | 593 | 0.347  | -93.341  | 45.479 | 1.00 | 0.00 |
| ZN2+   |      |     |     |     |        |          |        |      |      |
| HETATM | 9456 | C1  | 85C | 594 | 10.319 | -103.503 | 28.543 | 1.00 | 0.00 |
| C      |      |     |     |     |        |          |        |      |      |
| HETATM | 9457 | C2  | 85C | 594 | 11.355 | -104.462 | 28.503 | 1.00 | 0.00 |
| C      |      |     |     |     |        |          |        |      |      |
| HETATM | 9458 | C3  | 85C | 594 | 12.390 | -104.440 | 29.440 | 1.00 | 0.00 |
| C      |      |     |     |     |        |          |        |      |      |
| HETATM | 9459 | C4  | 85C | 594 | 10.356 | -102.445 | 29.498 | 1.00 | 0.00 |
| C      |      |     |     |     |        |          |        |      |      |
| HETATM | 9460 | C5  | 85C | 594 | 11.360 | -102.416 | 30.444 | 1.00 | 0.00 |
| C      |      |     |     |     |        |          |        |      |      |
| HETATM | 9461 | C6  | 85C | 594 | 12.386 | -103.349 | 30.343 | 1.00 | 0.00 |
| C      |      |     |     |     |        |          |        |      |      |
| HETATM | 9462 | N1  | 85C | 594 | 12.802 | -102.084 | 32.267 | 1.00 | 0.00 |
| N      |      |     |     |     |        |          |        |      |      |
| HETATM | 9463 | N2  | 85C | 594 | 16.025 | -101.208 | 33.940 | 1.00 | 0.00 |
| N      |      |     |     |     |        |          |        |      |      |
| HETATM | 9464 | S3  | 85C | 594 | 11.524 | -105.291 | 25.866 | 1.00 | 0.00 |
| S2+    |      |     |     |     |        |          |        |      |      |
| HETATM | 9465 | O31 | 85C | 594 | 10.703 | -104.144 | 25.495 | 1.00 | 0.00 |
| O1-    |      |     |     |     |        |          |        |      |      |
| HETATM | 9466 | O32 | 85C | 594 | 13.004 | -105.265 | 25.634 | 1.00 | 0.00 |
| O1-    |      |     |     |     |        |          |        |      |      |
| HETATM | 9467 | O1  | 85C | 594 | 11.066 | -100.675 | 32.100 | 1.00 | 0.00 |
| O      |      |     |     |     |        |          |        |      |      |

|        |      |     |     |     |                |        |      |      |
|--------|------|-----|-----|-----|----------------|--------|------|------|
| HETATM | 9468 | C7  | 85C | 594 | 13.337-103.049 | 31.456 | 1.00 | 0.00 |
| C      |      |     |     |     |                |        |      |      |
| HETATM | 9469 | C8  | 85C | 594 | 11.662-101.611 | 31.679 | 1.00 | 0.00 |
| C      |      |     |     |     |                |        |      |      |
| HETATM | 9470 | C9  | 85C | 594 | 13.566-101.498 | 33.404 | 1.00 | 0.00 |
| C      |      |     |     |     |                |        |      |      |
| HETATM | 9471 | C10 | 85C | 594 | 13.577-102.410 | 34.697 | 1.00 | 0.00 |
| C      |      |     |     |     |                |        |      |      |
| HETATM | 9472 | C11 | 85C | 594 | 14.474-101.723 | 35.745 | 1.00 | 0.00 |
| C      |      |     |     |     |                |        |      |      |
| HETATM | 9473 | C12 | 85C | 594 | 15.912-101.657 | 35.205 | 1.00 | 0.00 |
| C      |      |     |     |     |                |        |      |      |
| HETATM | 9474 | C13 | 85C | 594 | 15.013-100.945 | 33.127 | 1.00 | 0.00 |
| C      |      |     |     |     |                |        |      |      |
| HETATM | 9475 | N14 | 85C | 594 | 11.381-105.450 | 27.575 | 1.00 | 0.00 |
| N      |      |     |     |     |                |        |      |      |
| HETATM | 9476 | O2  | 85C | 594 | 15.181-100.232 | 32.157 | 1.00 | 0.00 |
| O      |      |     |     |     |                |        |      |      |
| HETATM | 9477 | O3  | 85C | 594 | 16.811-102.007 | 35.879 | 1.00 | 0.00 |
| O      |      |     |     |     |                |        |      |      |
| HETATM | 9478 | C   | 85C | 594 | 9.674-109.034  | 24.032 | 1.00 | 0.00 |
| C      |      |     |     |     |                |        |      |      |
| HETATM | 9479 | C14 | 85C | 594 | 10.442-108.162 | 23.205 | 1.00 | 0.00 |
| C      |      |     |     |     |                |        |      |      |
| HETATM | 9480 | CL  | 85C | 594 | 10.797-108.687 | 21.548 | 1.00 | 0.00 |
| CL     |      |     |     |     |                |        |      |      |
| HETATM | 9481 | C15 | 85C | 594 | 11.016-107.047 | 23.746 | 1.00 | 0.00 |
| C      |      |     |     |     |                |        |      |      |
| HETATM | 9482 | C16 | 85C | 594 | 11.771-106.058 | 22.883 | 1.00 | 0.00 |
| C      |      |     |     |     |                |        |      |      |
| HETATM | 9483 | C17 | 85C | 594 | 10.833-106.759 | 25.099 | 1.00 | 0.00 |
| C      |      |     |     |     |                |        |      |      |
| HETATM | 9484 | C18 | 85C | 594 | 10.056-107.613 | 25.897 | 1.00 | 0.00 |
| C      |      |     |     |     |                |        |      |      |
| HETATM | 9485 | C19 | 85C | 594 | 9.495-108.753  | 25.349 | 1.00 | 0.00 |
| C      |      |     |     |     |                |        |      |      |
| HETATM | 9486 | O   | 85C | 594 | 14.449-103.506 | 31.576 | 1.00 | 0.00 |
| O      |      |     |     |     |                |        |      |      |
| TER    | 9487 |     | 85C | 594 |                |        |      |      |
| ATOM   | 9488 | CH3 | ACE | 1   | 31.016-122.895 | 16.165 | 1.00 | 0.00 |
| C      |      |     |     |     |                |        |      |      |
| ATOM   | 9489 | C   | ACE | 1   | 31.213-122.158 | 14.873 | 1.00 | 0.00 |
| C      |      |     |     |     |                |        |      |      |
| ATOM   | 9490 | O   | ACE | 1   | 30.772-120.984 | 14.745 | 1.00 | 0.00 |
| O      |      |     |     |     |                |        |      |      |
| ATOM   | 9491 | N   | ILE | 2   | 31.745-122.843 | 13.860 | 1.00 | 0.00 |
| N      |      |     |     |     |                |        |      |      |
| ATOM   | 9492 | CA  | ILE | 2   | 31.661-122.316 | 12.445 | 1.00 | 0.00 |
| C      |      |     |     |     |                |        |      |      |
| ATOM   | 9493 | CB  | ILE | 2   | 32.567-123.105 | 11.442 | 1.00 | 0.00 |
| C      |      |     |     |     |                |        |      |      |
| ATOM   | 9494 | CG2 | ILE | 2   | 32.261-122.539 | 10.039 | 1.00 | 0.00 |
| C      |      |     |     |     |                |        |      |      |

|      |      |     |     |   |                |        |      |      |
|------|------|-----|-----|---|----------------|--------|------|------|
| ATOM | 9495 | CG1 | ILE | 2 | 34.084-122.883 | 11.755 | 1.00 | 0.00 |
| C    |      |     |     |   |                |        |      |      |
| ATOM | 9496 | CD1 | ILE | 2 | 34.843-124.232 | 11.594 | 1.00 | 0.00 |
| C    |      |     |     |   |                |        |      |      |
| ATOM | 9497 | C   | ILE | 2 | 30.223-122.403 | 11.993 | 1.00 | 0.00 |
| C    |      |     |     |   |                |        |      |      |
| ATOM | 9498 | O   | ILE | 2 | 29.613-123.496 | 12.045 | 1.00 | 0.00 |
| O    |      |     |     |   |                |        |      |      |
| ATOM | 9499 | N   | ARG | 3 | 29.661-121.306 | 11.396 | 1.00 | 0.00 |
| N    |      |     |     |   |                |        |      |      |
| ATOM | 9500 | CA  | ARG | 3 | 28.466-121.418 | 10.523 | 1.00 | 0.00 |
| C    |      |     |     |   |                |        |      |      |
| ATOM | 9501 | CB  | ARG | 3 | 27.254-120.888 | 11.301 | 1.00 | 0.00 |
| C    |      |     |     |   |                |        |      |      |
| ATOM | 9502 | CG  | ARG | 3 | 26.676-121.726 | 12.437 | 1.00 | 0.00 |
| C    |      |     |     |   |                |        |      |      |
| ATOM | 9503 | CD  | ARG | 3 | 27.261-121.449 | 13.840 | 1.00 | 0.00 |
| C    |      |     |     |   |                |        |      |      |
| ATOM | 9504 | NE  | ARG | 3 | 26.816-122.383 | 14.924 | 1.00 | 0.00 |
| N    |      |     |     |   |                |        |      |      |
| ATOM | 9505 | CZ  | ARG | 3 | 27.393-123.529 | 15.184 | 1.00 | 0.00 |
| C    |      |     |     |   |                |        |      |      |
| ATOM | 9506 | NH1 | ARG | 3 | 28.343-124.005 | 14.431 | 1.00 | 0.00 |
| N    |      |     |     |   |                |        |      |      |
| ATOM | 9507 | NH2 | ARG | 3 | 26.917-124.204 | 16.167 | 1.00 | 0.00 |
| N1+  |      |     |     |   |                |        |      |      |
| ATOM | 9508 | C   | ARG | 3 | 28.534-120.608 | 9.190  | 1.00 | 0.00 |
| C    |      |     |     |   |                |        |      |      |
| ATOM | 9509 | O   | ARG | 3 | 29.015-119.507 | 9.208  | 1.00 | 0.00 |
| O    |      |     |     |   |                |        |      |      |
| ATOM | 9510 | N   | LEU | 4 | 28.085-121.176 | 8.076  | 1.00 | 0.00 |
| N    |      |     |     |   |                |        |      |      |
| ATOM | 9511 | CA  | LEU | 4 | 27.688-120.441 | 6.824  | 1.00 | 0.00 |
| C    |      |     |     |   |                |        |      |      |
| ATOM | 9512 | CB  | LEU | 4 | 28.762-120.523 | 5.675  | 1.00 | 0.00 |
| C    |      |     |     |   |                |        |      |      |
| ATOM | 9513 | CG  | LEU | 4 | 28.398-119.916 | 4.285  | 1.00 | 0.00 |
| C    |      |     |     |   |                |        |      |      |
| ATOM | 9514 | CD1 | LEU | 4 | 29.644-119.230 | 3.702  | 1.00 | 0.00 |
| C    |      |     |     |   |                |        |      |      |
| ATOM | 9515 | CD2 | LEU | 4 | 27.906-120.917 | 3.191  | 1.00 | 0.00 |
| C    |      |     |     |   |                |        |      |      |
| ATOM | 9516 | C   | LEU | 4 | 26.311-120.918 | 6.266  | 1.00 | 0.00 |
| C    |      |     |     |   |                |        |      |      |
| ATOM | 9517 | O   | LEU | 4 | 26.251-122.045 | 5.736  | 1.00 | 0.00 |
| O    |      |     |     |   |                |        |      |      |
| ATOM | 9518 | N   | PRO | 5 | 25.248-120.141 | 6.454  | 1.00 | 0.00 |
| N    |      |     |     |   |                |        |      |      |
| ATOM | 9519 | CD  | PRO | 5 | 25.082-119.008 | 7.354  | 1.00 | 0.00 |
| C    |      |     |     |   |                |        |      |      |
| ATOM | 9520 | CG  | PRO | 5 | 23.736-119.238 | 8.000  | 1.00 | 0.00 |
| C    |      |     |     |   |                |        |      |      |
| ATOM | 9521 | CB  | PRO | 5 | 22.906-119.608 | 6.783  | 1.00 | 0.00 |
| C    |      |     |     |   |                |        |      |      |

|      |      |     |     |   |                |        |      |      |
|------|------|-----|-----|---|----------------|--------|------|------|
| ATOM | 9522 | CA  | PRO | 5 | 23.901-120.429 | 5.989  | 1.00 | 0.00 |
| C    |      |     |     |   |                |        |      |      |
| ATOM | 9523 | C   | PRO | 5 | 23.798-120.342 | 4.440  | 1.00 | 0.00 |
| C    |      |     |     |   |                |        |      |      |
| ATOM | 9524 | O   | PRO | 5 | 24.383-119.485 | 3.837  | 1.00 | 0.00 |
| O    |      |     |     |   |                |        |      |      |
| ATOM | 9525 | N   | ILE | 6 | 23.200-121.297 | 3.744  | 1.00 | 0.00 |
| N    |      |     |     |   |                |        |      |      |
| ATOM | 9526 | CA  | ILE | 6 | 22.953-121.318 | 2.326  | 1.00 | 0.00 |
| C    |      |     |     |   |                |        |      |      |
| ATOM | 9527 | CB  | ILE | 6 | 22.866-122.757 | 1.814  | 1.00 | 0.00 |
| C    |      |     |     |   |                |        |      |      |
| ATOM | 9528 | CG2 | ILE | 6 | 22.476-122.850 | 0.297  | 1.00 | 0.00 |
| C    |      |     |     |   |                |        |      |      |
| ATOM | 9529 | CG1 | ILE | 6 | 24.315-123.427 | 1.988  | 1.00 | 0.00 |
| C    |      |     |     |   |                |        |      |      |
| ATOM | 9530 | CD1 | ILE | 6 | 24.181-124.960 | 1.995  | 1.00 | 0.00 |
| C    |      |     |     |   |                |        |      |      |
| ATOM | 9531 | C   | ILE | 6 | 21.748-120.452 | 1.971  | 1.00 | 0.00 |
| C    |      |     |     |   |                |        |      |      |
| ATOM | 9532 | O   | ILE | 6 | 20.814-120.321 | 2.803  | 1.00 | 0.00 |
| O    |      |     |     |   |                |        |      |      |
| ATOM | 9533 | N   | VAL | 7 | 21.740-119.786 | 0.822  | 1.00 | 0.00 |
| N    |      |     |     |   |                |        |      |      |
| ATOM | 9534 | CA  | VAL | 7 | 20.521-119.086 | 0.339  | 1.00 | 0.00 |
| C    |      |     |     |   |                |        |      |      |
| ATOM | 9535 | CB  | VAL | 7 | 20.749-117.607 | 0.700  | 1.00 | 0.00 |
| C    |      |     |     |   |                |        |      |      |
| ATOM | 9536 | CG1 | VAL | 7 | 21.829-116.851 | -0.069 | 1.00 | 0.00 |
| C    |      |     |     |   |                |        |      |      |
| ATOM | 9537 | CG2 | VAL | 7 | 19.429-116.808 | 0.515  | 1.00 | 0.00 |
| C    |      |     |     |   |                |        |      |      |
| ATOM | 9538 | C   | VAL | 7 | 20.314-119.279 | -1.147 | 1.00 | 0.00 |
| C    |      |     |     |   |                |        |      |      |
| ATOM | 9539 | O   | VAL | 7 | 19.240-118.913 | -1.605 | 1.00 | 0.00 |
| O    |      |     |     |   |                |        |      |      |
| ATOM | 9540 | N   | ASP | 8 | 21.217-119.843 | -1.943 | 1.00 | 0.00 |
| N    |      |     |     |   |                |        |      |      |
| ATOM | 9541 | CA  | ASP | 8 | 20.957-120.322 | -3.305 | 1.00 | 0.00 |
| C    |      |     |     |   |                |        |      |      |
| ATOM | 9542 | CB  | ASP | 8 | 20.898-119.186 | -4.314 | 1.00 | 0.00 |
| C    |      |     |     |   |                |        |      |      |
| ATOM | 9543 | CG  | ASP | 8 | 20.134-119.616 | -5.573 | 1.00 | 0.00 |
| C    |      |     |     |   |                |        |      |      |
| ATOM | 9544 | OD1 | ASP | 8 | 19.523-120.702 | -5.680 | 1.00 | 0.00 |
| O    |      |     |     |   |                |        |      |      |
| ATOM | 9545 | OD2 | ASP | 8 | 20.301-118.984 | -6.654 | 1.00 | 0.00 |
| O1-  |      |     |     |   |                |        |      |      |
| ATOM | 9546 | C   | ASP | 8 | 22.078-121.424 | -3.652 | 1.00 | 0.00 |
| C    |      |     |     |   |                |        |      |      |
| ATOM | 9547 | O   | ASP | 8 | 23.204-121.381 | -3.156 | 1.00 | 0.00 |
| O    |      |     |     |   |                |        |      |      |
| ATOM | 9548 | N   | LYS | 9 | 21.713-122.404 | -4.418 | 1.00 | 0.00 |
| N    |      |     |     |   |                |        |      |      |

|      |      |     |     |    |                |        |      |      |
|------|------|-----|-----|----|----------------|--------|------|------|
| ATOM | 9549 | CA  | LYS | 9  | 22.594-123.511 | -4.815 | 1.00 | 0.00 |
| C    |      |     |     |    |                |        |      |      |
| ATOM | 9550 | CB  | LYS | 9  | 22.259-124.655 | -3.857 | 1.00 | 0.00 |
| C    |      |     |     |    |                |        |      |      |
| ATOM | 9551 | CG  | LYS | 9  | 20.919-125.406 | -4.148 | 1.00 | 0.00 |
| C    |      |     |     |    |                |        |      |      |
| ATOM | 9552 | CD  | LYS | 9  | 19.671-124.533 | -4.467 | 1.00 | 0.00 |
| C    |      |     |     |    |                |        |      |      |
| ATOM | 9553 | CE  | LYS | 9  | 18.302-125.225 | -4.641 | 1.00 | 0.00 |
| C    |      |     |     |    |                |        |      |      |
| ATOM | 9554 | NZ  | LYS | 9  | 17.211-124.345 | -5.041 | 1.00 | 0.00 |
| N1+  |      |     |     |    |                |        |      |      |
| ATOM | 9555 | C   | LYS | 9  | 22.517-123.856 | -6.360 | 1.00 | 0.00 |
| C    |      |     |     |    |                |        |      |      |
| ATOM | 9556 | O   | LYS | 9  | 21.653-123.463 | -7.116 | 1.00 | 0.00 |
| O    |      |     |     |    |                |        |      |      |
| ATOM | 9557 | N   | TYR | 10 | 23.663-124.407 | -6.754 | 1.00 | 0.00 |
| N    |      |     |     |    |                |        |      |      |
| ATOM | 9558 | CA  | TYR | 10 | 23.972-124.825 | -8.129 | 1.00 | 0.00 |
| C    |      |     |     |    |                |        |      |      |
| ATOM | 9559 | CB  | TYR | 10 | 24.787-123.712 | -8.831 | 1.00 | 0.00 |
| C    |      |     |     |    |                |        |      |      |
| ATOM | 9560 | CG  | TYR | 10 | 24.503-122.276 | -8.335 | 1.00 | 0.00 |
| C    |      |     |     |    |                |        |      |      |
| ATOM | 9561 | CD1 | TYR | 10 | 23.567-121.465 | -9.080 | 1.00 | 0.00 |
| C    |      |     |     |    |                |        |      |      |
| ATOM | 9562 | CE1 | TYR | 10 | 23.375-120.126 | -8.646 | 1.00 | 0.00 |
| C    |      |     |     |    |                |        |      |      |
| ATOM | 9563 | CZ  | TYR | 10 | 23.972-119.566 | -7.513 | 1.00 | 0.00 |
| C    |      |     |     |    |                |        |      |      |
| ATOM | 9564 | OH  | TYR | 10 | 23.583-118.270 | -7.176 | 1.00 | 0.00 |
| O    |      |     |     |    |                |        |      |      |
| ATOM | 9565 | CE2 | TYR | 10 | 24.985-120.263 | -6.861 | 1.00 | 0.00 |
| C    |      |     |     |    |                |        |      |      |
| ATOM | 9566 | CD2 | TYR | 10 | 25.228-121.625 | -7.266 | 1.00 | 0.00 |
| C    |      |     |     |    |                |        |      |      |
| ATOM | 9567 | C   | TYR | 10 | 24.701-126.173 | -8.149 | 1.00 | 0.00 |
| C    |      |     |     |    |                |        |      |      |
| ATOM | 9568 | O   | TYR | 10 | 25.467-126.551 | -7.260 | 1.00 | 0.00 |
| O    |      |     |     |    |                |        |      |      |
| ATOM | 9569 | N   | LYS | 11 | 24.568-126.922 | -9.285 | 1.00 | 0.00 |
| N    |      |     |     |    |                |        |      |      |
| ATOM | 9570 | CA  | LYS | 11 | 25.324-128.132 | -9.647 | 1.00 | 0.00 |
| C    |      |     |     |    |                |        |      |      |
| ATOM | 9571 | CB  | LYS | 11 | 24.479-129.391 | -9.193 | 1.00 | 0.00 |
| C    |      |     |     |    |                |        |      |      |
| ATOM | 9572 | CG  | LYS | 11 | 24.488-129.617 | -7.694 | 1.00 | 0.00 |
| C    |      |     |     |    |                |        |      |      |
| ATOM | 9573 | CD  | LYS | 11 | 23.763-130.954 | -7.336 | 1.00 | 0.00 |
| C    |      |     |     |    |                |        |      |      |
| ATOM | 9574 | CE  | LYS | 11 | 23.608-131.043 | -5.796 | 1.00 | 0.00 |
| C    |      |     |     |    |                |        |      |      |
| ATOM | 9575 | NZ  | LYS | 11 | 22.654-132.164 | -5.485 | 1.00 | 0.00 |
| N1+  |      |     |     |    |                |        |      |      |

|      |      |     |     |    |        |          |         |      |      |
|------|------|-----|-----|----|--------|----------|---------|------|------|
| ATOM | 9576 | C   | LYS | 11 | 25.646 | -128.297 | -11.153 | 1.00 | 0.00 |
| C    |      |     |     |    |        |          |         |      |      |
| ATOM | 9577 | O   | LYS | 11 | 26.363 | -129.204 | -11.537 | 1.00 | 0.00 |
| O    |      |     |     |    |        |          |         |      |      |
| ATOM | 9578 | N   | ASP | 12 | 25.053 | -127.485 | -11.936 | 1.00 | 0.00 |
| N    |      |     |     |    |        |          |         |      |      |
| ATOM | 9579 | CA  | ASP | 12 | 25.395 | -127.386 | -13.349 | 1.00 | 0.00 |
| C    |      |     |     |    |        |          |         |      |      |
| ATOM | 9580 | CB  | ASP | 12 | 24.727 | -126.163 | -13.986 | 1.00 | 0.00 |
| C    |      |     |     |    |        |          |         |      |      |
| ATOM | 9581 | CG  | ASP | 12 | 23.217 | -126.376 | -14.139 | 1.00 | 0.00 |
| C    |      |     |     |    |        |          |         |      |      |
| ATOM | 9582 | OD1 | ASP | 12 | 22.428 | -125.389 | -14.060 | 1.00 | 0.00 |
| O    |      |     |     |    |        |          |         |      |      |
| ATOM | 9583 | OD2 | ASP | 12 | 22.718 | -127.519 | -14.133 | 1.00 | 0.00 |
| O1-  |      |     |     |    |        |          |         |      |      |
| ATOM | 9584 | C   | ASP | 12 | 26.920 | -127.255 | -13.411 | 1.00 | 0.00 |
| C    |      |     |     |    |        |          |         |      |      |
| ATOM | 9585 | O   | ASP | 12 | 27.479 | -126.250 | -13.010 | 1.00 | 0.00 |
| O    |      |     |     |    |        |          |         |      |      |
| ATOM | 9586 | N   | MET | 13 | 27.561 | -128.291 | -14.020 | 1.00 | 0.00 |
| N    |      |     |     |    |        |          |         |      |      |
| ATOM | 9587 | CA  | MET | 13 | 28.977 | -128.431 | -14.147 | 1.00 | 0.00 |
| C    |      |     |     |    |        |          |         |      |      |
| ATOM | 9588 | CB  | MET | 13 | 29.456 | -127.558 | -15.254 | 1.00 | 0.00 |
| C    |      |     |     |    |        |          |         |      |      |
| ATOM | 9589 | CG  | MET | 13 | 30.847 | -127.927 | -15.783 | 1.00 | 0.00 |
| C    |      |     |     |    |        |          |         |      |      |
| ATOM | 9590 | SD  | MET | 13 | 31.066 | -129.679 | -16.332 | 1.00 | 0.00 |
| S    |      |     |     |    |        |          |         |      |      |
| ATOM | 9591 | CE  | MET | 13 | 29.707 | -129.951 | -17.520 | 1.00 | 0.00 |
| C    |      |     |     |    |        |          |         |      |      |
| ATOM | 9592 | C   | MET | 13 | 29.800 | -128.365 | -12.911 | 1.00 | 0.00 |
| C    |      |     |     |    |        |          |         |      |      |
| ATOM | 9593 | O   | MET | 13 | 30.945 | -127.880 | -12.962 | 1.00 | 0.00 |
| O    |      |     |     |    |        |          |         |      |      |
| ATOM | 9594 | N   | GLY | 14 | 29.366 | -128.930 | -11.783 | 1.00 | 0.00 |
| N    |      |     |     |    |        |          |         |      |      |
| ATOM | 9595 | CA  | GLY | 14 | 30.013 | -129.086 | -10.551 | 1.00 | 0.00 |
| C    |      |     |     |    |        |          |         |      |      |
| ATOM | 9596 | C   | GLY | 14 | 29.364 | -128.291 | -9.429  | 1.00 | 0.00 |
| C    |      |     |     |    |        |          |         |      |      |
| ATOM | 9597 | O   | GLY | 14 | 28.671 | -127.301 | -9.685  | 1.00 | 0.00 |
| O    |      |     |     |    |        |          |         |      |      |
| ATOM | 9598 | N   | THR | 15 | 29.413 | -128.720 | -8.167  | 1.00 | 0.00 |
| N    |      |     |     |    |        |          |         |      |      |
| ATOM | 9599 | CA  | THR | 15 | 28.729 | -128.044 | -7.061  | 1.00 | 0.00 |
| C    |      |     |     |    |        |          |         |      |      |
| ATOM | 9600 | CB  | THR | 15 | 28.797 | -128.865 | -5.846  | 1.00 | 0.00 |
| C    |      |     |     |    |        |          |         |      |      |
| ATOM | 9601 | CG2 | THR | 15 | 27.721 | -128.366 | -4.796  | 1.00 | 0.00 |
| C    |      |     |     |    |        |          |         |      |      |
| ATOM | 9602 | OG1 | THR | 15 | 28.444 | -130.173 | -6.022  | 1.00 | 0.00 |
| O    |      |     |     |    |        |          |         |      |      |

|      |      |     |     |    |                |        |      |      |
|------|------|-----|-----|----|----------------|--------|------|------|
| ATOM | 9603 | C   | THR | 15 | 29.308-126.681 | -6.700 | 1.00 | 0.00 |
| C    |      |     |     |    |                |        |      |      |
| ATOM | 9604 | O   | THR | 15 | 30.521-126.512 | -6.609 | 1.00 | 0.00 |
| O    |      |     |     |    |                |        |      |      |
| ATOM | 9605 | N   | VAL | 16 | 28.386-125.808 | -6.512 | 1.00 | 0.00 |
| N    |      |     |     |    |                |        |      |      |
| ATOM | 9606 | CA  | VAL | 16 | 28.552-124.409 | -6.041 | 1.00 | 0.00 |
| C    |      |     |     |    |                |        |      |      |
| ATOM | 9607 | CB  | VAL | 16 | 28.636-123.344 | -7.158 | 1.00 | 0.00 |
| C    |      |     |     |    |                |        |      |      |
| ATOM | 9608 | CG1 | VAL | 16 | 29.112-122.077 | -6.433 | 1.00 | 0.00 |
| C    |      |     |     |    |                |        |      |      |
| ATOM | 9609 | CG2 | VAL | 16 | 29.726-123.536 | -8.212 | 1.00 | 0.00 |
| C    |      |     |     |    |                |        |      |      |
| ATOM | 9610 | C   | VAL | 16 | 27.433-124.109 | -5.054 | 1.00 | 0.00 |
| C    |      |     |     |    |                |        |      |      |
| ATOM | 9611 | O   | VAL | 16 | 26.296-124.446 | -5.301 | 1.00 | 0.00 |
| O    |      |     |     |    |                |        |      |      |
| ATOM | 9612 | N   | VAL | 17 | 27.655-123.256 | -4.068 | 1.00 | 0.00 |
| N    |      |     |     |    |                |        |      |      |
| ATOM | 9613 | CA  | VAL | 17 | 26.502-122.671 | -3.264 | 1.00 | 0.00 |
| C    |      |     |     |    |                |        |      |      |
| ATOM | 9614 | CB  | VAL | 17 | 26.193-123.491 | -2.048 | 1.00 | 0.00 |
| C    |      |     |     |    |                |        |      |      |
| ATOM | 9615 | CG1 | VAL | 17 | 25.996-124.964 | -2.356 | 1.00 | 0.00 |
| C    |      |     |     |    |                |        |      |      |
| ATOM | 9616 | CG2 | VAL | 17 | 27.315-123.523 | -1.020 | 1.00 | 0.00 |
| C    |      |     |     |    |                |        |      |      |
| ATOM | 9617 | C   | VAL | 17 | 26.771-121.189 | -2.948 | 1.00 | 0.00 |
| C    |      |     |     |    |                |        |      |      |
| ATOM | 9618 | O   | VAL | 17 | 27.874-120.742 | -2.928 | 1.00 | 0.00 |
| O    |      |     |     |    |                |        |      |      |
| ATOM | 9619 | N   | LEU | 18 | 25.734-120.365 | -2.708 | 1.00 | 0.00 |
| N    |      |     |     |    |                |        |      |      |
| ATOM | 9620 | CA  | LEU | 18 | 25.773-118.932 | -2.300 | 1.00 | 0.00 |
| C    |      |     |     |    |                |        |      |      |
| ATOM | 9621 | CB  | LEU | 18 | 24.781-118.221 | -3.169 | 1.00 | 0.00 |
| C    |      |     |     |    |                |        |      |      |
| ATOM | 9622 | CG  | LEU | 18 | 24.529-116.712 | -2.919 | 1.00 | 0.00 |
| C    |      |     |     |    |                |        |      |      |
| ATOM | 9623 | CD1 | LEU | 18 | 25.777-115.797 | -2.933 | 1.00 | 0.00 |
| C    |      |     |     |    |                |        |      |      |
| ATOM | 9624 | CD2 | LEU | 18 | 23.639-116.275 | -4.125 | 1.00 | 0.00 |
| C    |      |     |     |    |                |        |      |      |
| ATOM | 9625 | C   | LEU | 18 | 25.352-118.717 | -0.887 | 1.00 | 0.00 |
| C    |      |     |     |    |                |        |      |      |
| ATOM | 9626 | O   | LEU | 18 | 24.451-119.388 | -0.376 | 1.00 | 0.00 |
| O    |      |     |     |    |                |        |      |      |
| ATOM | 9627 | N   | GLY | 19 | 26.071-117.813 | -0.244 | 1.00 | 0.00 |
| N    |      |     |     |    |                |        |      |      |
| ATOM | 9628 | CA  | GLY | 19 | 25.817-117.677 | 1.198  | 1.00 | 0.00 |
| C    |      |     |     |    |                |        |      |      |
| ATOM | 9629 | C   | GLY | 19 | 26.956-116.864 | 1.896  | 1.00 | 0.00 |
| C    |      |     |     |    |                |        |      |      |



|      |      |     |     |    |                |        |      |      |
|------|------|-----|-----|----|----------------|--------|------|------|
| ATOM | 9630 | O   | GLY | 19 | 28.027-116.605 | 1.366  | 1.00 | 0.00 |
| O    |      |     |     |    |                |        |      |      |
| ATOM | 9631 | N   | LYS | 20 | 26.615-116.278 | 3.053  | 1.00 | 0.00 |
| N    |      |     |     |    |                |        |      |      |
| ATOM | 9632 | CA  | LYS | 20 | 27.476-115.443 | 3.907  | 1.00 | 0.00 |
| C    |      |     |     |    |                |        |      |      |
| ATOM | 9633 | CB  | LYS | 20 | 26.596-114.357 | 4.427  | 1.00 | 0.00 |
| C    |      |     |     |    |                |        |      |      |
| ATOM | 9634 | CG  | LYS | 20 | 27.379-113.141 | 4.951  | 1.00 | 0.00 |
| C    |      |     |     |    |                |        |      |      |
| ATOM | 9635 | CD  | LYS | 20 | 26.542-112.259 | 5.863  | 1.00 | 0.00 |
| C    |      |     |     |    |                |        |      |      |
| ATOM | 9636 | CE  | LYS | 20 | 26.413-113.046 | 7.184  | 1.00 | 0.00 |
| C    |      |     |     |    |                |        |      |      |
| ATOM | 9637 | NZ  | LYS | 20 | 25.540-112.417 | 8.231  | 1.00 | 0.00 |
| N1+  |      |     |     |    |                |        |      |      |
| ATOM | 9638 | C   | LYS | 20 | 28.031-116.248 | 5.081  | 1.00 | 0.00 |
| C    |      |     |     |    |                |        |      |      |
| ATOM | 9639 | O   | LYS | 20 | 27.253-116.877 | 5.733  | 1.00 | 0.00 |
| O    |      |     |     |    |                |        |      |      |
| ATOM | 9640 | N   | LEU | 21 | 29.308-116.100 | 5.381  | 1.00 | 0.00 |
| N    |      |     |     |    |                |        |      |      |
| ATOM | 9641 | CA  | LEU | 21 | 30.016-116.688 | 6.540  | 1.00 | 0.00 |
| C    |      |     |     |    |                |        |      |      |
| ATOM | 9642 | CB  | LEU | 21 | 31.496-116.603 | 6.274  | 1.00 | 0.00 |
| C    |      |     |     |    |                |        |      |      |
| ATOM | 9643 | CG  | LEU | 21 | 32.466-116.857 | 7.460  | 1.00 | 0.00 |
| C    |      |     |     |    |                |        |      |      |
| ATOM | 9644 | CD1 | LEU | 21 | 32.343-118.323 | 8.039  | 1.00 | 0.00 |
| C    |      |     |     |    |                |        |      |      |
| ATOM | 9645 | CD2 | LEU | 21 | 33.932-116.595 | 7.099  | 1.00 | 0.00 |
| C    |      |     |     |    |                |        |      |      |
| ATOM | 9646 | C   | LEU | 21 | 29.524-115.964 | 7.818  | 1.00 | 0.00 |
| C    |      |     |     |    |                |        |      |      |
| ATOM | 9647 | O   | LEU | 21 | 29.468-114.712 | 7.792  | 1.00 | 0.00 |
| O    |      |     |     |    |                |        |      |      |
| ATOM | 9648 | N   | GLU | 22 | 29.285-116.679 | 8.929  | 1.00 | 0.00 |
| N    |      |     |     |    |                |        |      |      |
| ATOM | 9649 | CA  | GLU | 22 | 28.683-116.097 | 10.161 | 1.00 | 0.00 |
| C    |      |     |     |    |                |        |      |      |
| ATOM | 9650 | CB  | GLU | 22 | 27.333-116.718 | 10.489 | 1.00 | 0.00 |
| C    |      |     |     |    |                |        |      |      |
| ATOM | 9651 | CG  | GLU | 22 | 26.230-116.281 | 9.461  | 1.00 | 0.00 |
| C    |      |     |     |    |                |        |      |      |
| ATOM | 9652 | CD  | GLU | 22 | 25.529-114.949 | 9.783  | 1.00 | 0.00 |
| C    |      |     |     |    |                |        |      |      |
| ATOM | 9653 | OE1 | GLU | 22 | 26.202-114.109 | 10.260 | 1.00 | 0.00 |
| O    |      |     |     |    |                |        |      |      |
| ATOM | 9654 | OE2 | GLU | 22 | 24.381-114.765 | 9.312  | 1.00 | 0.00 |
| O1-  |      |     |     |    |                |        |      |      |
| ATOM | 9655 | C   | GLU | 22 | 29.672-116.213 | 11.309 | 1.00 | 0.00 |
| C    |      |     |     |    |                |        |      |      |
| ATOM | 9656 | O   | GLU | 22 | 29.656-115.411 | 12.248 | 1.00 | 0.00 |
| O    |      |     |     |    |                |        |      |      |

|      |      |     |     |    |                |        |      |      |
|------|------|-----|-----|----|----------------|--------|------|------|
| ATOM | 9657 | N   | SER | 23 | 30.474-117.246 | 11.440 | 1.00 | 0.00 |
| N    |      |     |     |    |                |        |      |      |
| ATOM | 9658 | CA  | SER | 23 | 31.429-117.360 | 12.550 | 1.00 | 0.00 |
| C    |      |     |     |    |                |        |      |      |
| ATOM | 9659 | CB  | SER | 23 | 30.665-117.730 | 13.793 | 1.00 | 0.00 |
| C    |      |     |     |    |                |        |      |      |
| ATOM | 9660 | OG  | SER | 23 | 31.446-118.358 | 14.690 | 1.00 | 0.00 |
| O    |      |     |     |    |                |        |      |      |
| ATOM | 9661 | C   | SER | 23 | 32.578-118.387 | 12.202 | 1.00 | 0.00 |
| C    |      |     |     |    |                |        |      |      |
| ATOM | 9662 | O   | SER | 23 | 32.325-119.151 | 11.229 | 1.00 | 0.00 |
| O    |      |     |     |    |                |        |      |      |
| ATOM | 9663 | N   | GLY | 24 | 33.810-118.406 | 12.787 | 1.00 | 0.00 |
| N    |      |     |     |    |                |        |      |      |
| ATOM | 9664 | CA  | GLY | 24 | 34.847-119.311 | 12.279 | 1.00 | 0.00 |
| C    |      |     |     |    |                |        |      |      |
| ATOM | 9665 | C   | GLY | 24 | 35.484-118.867 | 10.969 | 1.00 | 0.00 |
| C    |      |     |     |    |                |        |      |      |
| ATOM | 9666 | O   | GLY | 24 | 35.723-117.688 | 10.738 | 1.00 | 0.00 |
| O    |      |     |     |    |                |        |      |      |
| ATOM | 9667 | N   | SER | 25 | 35.708-119.865 | 10.134 | 1.00 | 0.00 |
| N    |      |     |     |    |                |        |      |      |
| ATOM | 9668 | CA  | SER | 25 | 36.292-119.746 | 8.821  | 1.00 | 0.00 |
| C    |      |     |     |    |                |        |      |      |
| ATOM | 9669 | CB  | SER | 25 | 37.809-119.470 | 8.924  | 1.00 | 0.00 |
| C    |      |     |     |    |                |        |      |      |
| ATOM | 9670 | OG  | SER | 25 | 38.470-120.635 | 9.460  | 1.00 | 0.00 |
| O    |      |     |     |    |                |        |      |      |
| ATOM | 9671 | C   | SER | 25 | 36.099-120.963 | 7.909  | 1.00 | 0.00 |
| C    |      |     |     |    |                |        |      |      |
| ATOM | 9672 | O   | SER | 25 | 35.836-122.079 | 8.422  | 1.00 | 0.00 |
| O    |      |     |     |    |                |        |      |      |
| ATOM | 9673 | N   | ILE | 26 | 36.154-120.752 | 6.626  | 1.00 | 0.00 |
| N    |      |     |     |    |                |        |      |      |
| ATOM | 9674 | CA  | ILE | 26 | 35.782-121.731 | 5.581  | 1.00 | 0.00 |
| C    |      |     |     |    |                |        |      |      |
| ATOM | 9675 | CB  | ILE | 26 | 34.316-121.656 | 5.076  | 1.00 | 0.00 |
| C    |      |     |     |    |                |        |      |      |
| ATOM | 9676 | CG2 | ILE | 26 | 34.050-122.637 | 3.890  | 1.00 | 0.00 |
| C    |      |     |     |    |                |        |      |      |
| ATOM | 9677 | CG1 | ILE | 26 | 33.465-122.068 | 6.315  | 1.00 | 0.00 |
| C    |      |     |     |    |                |        |      |      |
| ATOM | 9678 | CD1 | ILE | 26 | 31.937-122.033 | 5.962  | 1.00 | 0.00 |
| C    |      |     |     |    |                |        |      |      |
| ATOM | 9679 | C   | ILE | 26 | 36.841-121.600 | 4.417  | 1.00 | 0.00 |
| C    |      |     |     |    |                |        |      |      |
| ATOM | 9680 | O   | ILE | 26 | 36.786-120.613 | 3.712  | 1.00 | 0.00 |
| O    |      |     |     |    |                |        |      |      |
| ATOM | 9681 | N   | CYS | 27 | 37.642-122.623 | 4.238  | 1.00 | 0.00 |
| N    |      |     |     |    |                |        |      |      |
| ATOM | 9682 | CA  | CYS | 27 | 38.817-122.666 | 3.324  | 1.00 | 0.00 |
| C    |      |     |     |    |                |        |      |      |
| ATOM | 9683 | CB  | CYS | 27 | 40.071-122.517 | 4.187  | 1.00 | 0.00 |
| C    |      |     |     |    |                |        |      |      |

|      |      |     |     |    |                |        |      |      |
|------|------|-----|-----|----|----------------|--------|------|------|
| ATOM | 9684 | SG  | CYS | 27 | 41.650-122.373 | 3.283  | 1.00 | 0.00 |
| S    |      |     |     |    |                |        |      |      |
| ATOM | 9685 | C   | CYS | 27 | 38.899-123.860 | 2.313  | 1.00 | 0.00 |
| C    |      |     |     |    |                |        |      |      |
| ATOM | 9686 | O   | CYS | 27 | 38.301-124.880 | 2.667  | 1.00 | 0.00 |
| O    |      |     |     |    |                |        |      |      |
| ATOM | 9687 | N   | LYS | 28 | 39.664-123.640 | 1.153  | 1.00 | 0.00 |
| N    |      |     |     |    |                |        |      |      |
| ATOM | 9688 | CA  | LYS | 28 | 39.908-124.793 | 0.322  | 1.00 | 0.00 |
| C    |      |     |     |    |                |        |      |      |
| ATOM | 9689 | CB  | LYS | 28 | 40.950-124.342 | -0.751 | 1.00 | 0.00 |
| C    |      |     |     |    |                |        |      |      |
| ATOM | 9690 | CG  | LYS | 28 | 40.322-123.413 | -1.808 | 1.00 | 0.00 |
| C    |      |     |     |    |                |        |      |      |
| ATOM | 9691 | CD  | LYS | 28 | 41.006-123.371 | -3.179 | 1.00 | 0.00 |
| C    |      |     |     |    |                |        |      |      |
| ATOM | 9692 | CE  | LYS | 28 | 41.407-124.746 | -3.829 | 1.00 | 0.00 |
| C    |      |     |     |    |                |        |      |      |
| ATOM | 9693 | NZ  | LYS | 28 | 41.833-124.651 | -5.261 | 1.00 | 0.00 |
| N1+  |      |     |     |    |                |        |      |      |
| ATOM | 9694 | C   | LYS | 28 | 40.528-125.983 | 1.086  | 1.00 | 0.00 |
| C    |      |     |     |    |                |        |      |      |
| ATOM | 9695 | O   | LYS | 28 | 41.465-125.841 | 1.933  | 1.00 | 0.00 |
| O    |      |     |     |    |                |        |      |      |
| ATOM | 9696 | N   | GLY | 29 | 39.953-127.163 | 0.820  | 1.00 | 0.00 |
| N    |      |     |     |    |                |        |      |      |
| ATOM | 9697 | CA  | GLY | 29 | 40.293-128.419 | 1.494  | 1.00 | 0.00 |
| C    |      |     |     |    |                |        |      |      |
| ATOM | 9698 | C   | GLY | 29 | 39.659-128.689 | 2.807  | 1.00 | 0.00 |
| C    |      |     |     |    |                |        |      |      |
| ATOM | 9699 | O   | GLY | 29 | 39.803-129.802 | 3.347  | 1.00 | 0.00 |
| O    |      |     |     |    |                |        |      |      |
| ATOM | 9700 | N   | GLN | 30 | 38.993-127.717 | 3.390  | 1.00 | 0.00 |
| N    |      |     |     |    |                |        |      |      |
| ATOM | 9701 | CA  | GLN | 30 | 38.380-127.926 | 4.724  | 1.00 | 0.00 |
| C    |      |     |     |    |                |        |      |      |
| ATOM | 9702 | CB  | GLN | 30 | 38.061-126.579 | 5.365  | 1.00 | 0.00 |
| C    |      |     |     |    |                |        |      |      |
| ATOM | 9703 | CG  | GLN | 30 | 37.550-126.652 | 6.788  | 1.00 | 0.00 |
| C    |      |     |     |    |                |        |      |      |
| ATOM | 9704 | CD  | GLN | 30 | 37.258-125.214 | 7.203  | 1.00 | 0.00 |
| C    |      |     |     |    |                |        |      |      |
| ATOM | 9705 | OE1 | GLN | 30 | 37.860-124.251 | 6.760  | 1.00 | 0.00 |
| O    |      |     |     |    |                |        |      |      |
| ATOM | 9706 | NE2 | GLN | 30 | 36.400-124.935 | 8.085  | 1.00 | 0.00 |
| N    |      |     |     |    |                |        |      |      |
| ATOM | 9707 | C   | GLN | 30 | 37.074-128.732 | 4.557  | 1.00 | 0.00 |
| C    |      |     |     |    |                |        |      |      |
| ATOM | 9708 | O   | GLN | 30 | 36.367-128.580 | 3.532  | 1.00 | 0.00 |
| O    |      |     |     |    |                |        |      |      |
| ATOM | 9709 | N   | GLN | 31 | 36.809-129.726 | 5.400  | 1.00 | 0.00 |
| N    |      |     |     |    |                |        |      |      |
| ATOM | 9710 | CA  | GLN | 31 | 35.553-130.539 | 5.457  | 1.00 | 0.00 |
| C    |      |     |     |    |                |        |      |      |

|      |      |     |     |    |                |       |      |      |
|------|------|-----|-----|----|----------------|-------|------|------|
| ATOM | 9711 | CB  | GLN | 31 | 35.987-131.928 | 5.896 | 1.00 | 0.00 |
| C    |      |     |     |    |                |       |      |      |
| ATOM | 9712 | CG  | GLN | 31 | 36.833-132.449 | 4.681 | 1.00 | 0.00 |
| C    |      |     |     |    |                |       |      |      |
| ATOM | 9713 | CD  | GLN | 31 | 36.667-133.928 | 4.607 | 1.00 | 0.00 |
| C    |      |     |     |    |                |       |      |      |
| ATOM | 9714 | OE1 | GLN | 31 | 36.494-134.581 | 5.617 | 1.00 | 0.00 |
| O    |      |     |     |    |                |       |      |      |
| ATOM | 9715 | NE2 | GLN | 31 | 36.849-134.574 | 3.469 | 1.00 | 0.00 |
| N    |      |     |     |    |                |       |      |      |
| ATOM | 9716 | C   | GLN | 31 | 34.674-129.886 | 6.562 | 1.00 | 0.00 |
| C    |      |     |     |    |                |       |      |      |
| ATOM | 9717 | O   | GLN | 31 | 35.127-129.462 | 7.644 | 1.00 | 0.00 |
| O    |      |     |     |    |                |       |      |      |
| ATOM | 9718 | N   | LEU | 32 | 33.428-129.973 | 6.243 | 1.00 | 0.00 |
| N    |      |     |     |    |                |       |      |      |
| ATOM | 9719 | CA  | LEU | 32 | 32.326-129.330 | 6.920 | 1.00 | 0.00 |
| C    |      |     |     |    |                |       |      |      |
| ATOM | 9720 | CB  | LEU | 32 | 32.029-127.942 | 6.344 | 1.00 | 0.00 |
| C    |      |     |     |    |                |       |      |      |
| ATOM | 9721 | CG  | LEU | 32 | 33.196-126.966 | 6.327 | 1.00 | 0.00 |
| C    |      |     |     |    |                |       |      |      |
| ATOM | 9722 | CD1 | LEU | 32 | 33.518-126.443 | 4.921 | 1.00 | 0.00 |
| C    |      |     |     |    |                |       |      |      |
| ATOM | 9723 | CD2 | LEU | 32 | 32.965-125.732 | 7.289 | 1.00 | 0.00 |
| C    |      |     |     |    |                |       |      |      |
| ATOM | 9724 | C   | LEU | 32 | 31.050-130.311 | 6.844 | 1.00 | 0.00 |
| C    |      |     |     |    |                |       |      |      |
| ATOM | 9725 | O   | LEU | 32 | 30.896-131.049 | 5.899 | 1.00 | 0.00 |
| O    |      |     |     |    |                |       |      |      |
| ATOM | 9726 | N   | VAL | 33 | 30.145-130.237 | 7.846 | 1.00 | 0.00 |
| N    |      |     |     |    |                |       |      |      |
| ATOM | 9727 | CA  | VAL | 33 | 28.846-131.013 | 8.007 | 1.00 | 0.00 |
| C    |      |     |     |    |                |       |      |      |
| ATOM | 9728 | CB  | VAL | 33 | 28.788-131.671 | 9.368 | 1.00 | 0.00 |
| C    |      |     |     |    |                |       |      |      |
| ATOM | 9729 | CG1 | VAL | 33 | 27.256-132.067 | 9.644 | 1.00 | 0.00 |
| C    |      |     |     |    |                |       |      |      |
| ATOM | 9730 | CG2 | VAL | 33 | 29.744-132.886 | 9.451 | 1.00 | 0.00 |
| C    |      |     |     |    |                |       |      |      |
| ATOM | 9731 | C   | VAL | 33 | 27.702-129.989 | 7.805 | 1.00 | 0.00 |
| C    |      |     |     |    |                |       |      |      |
| ATOM | 9732 | O   | VAL | 33 | 27.530-129.054 | 8.586 | 1.00 | 0.00 |
| O    |      |     |     |    |                |       |      |      |
| ATOM | 9733 | N   | MET | 34 | 27.019-130.185 | 6.665 | 1.00 | 0.00 |
| N    |      |     |     |    |                |       |      |      |
| ATOM | 9734 | CA  | MET | 34 | 25.738-129.534 | 6.330 | 1.00 | 0.00 |
| C    |      |     |     |    |                |       |      |      |
| ATOM | 9735 | CB  | MET | 34 | 25.468-129.684 | 4.842 | 1.00 | 0.00 |
| C    |      |     |     |    |                |       |      |      |
| ATOM | 9736 | CG  | MET | 34 | 24.401-128.879 | 4.308 | 1.00 | 0.00 |
| C    |      |     |     |    |                |       |      |      |
| ATOM | 9737 | SD  | MET | 34 | 24.263-128.908 | 2.493 | 1.00 | 0.00 |
| S    |      |     |     |    |                |       |      |      |

|      |      |     |     |    |                |        |      |      |
|------|------|-----|-----|----|----------------|--------|------|------|
| ATOM | 9738 | CE  | MET | 34 | 24.161-130.640 | 2.159  | 1.00 | 0.00 |
| C    |      |     |     |    |                |        |      |      |
| ATOM | 9739 | C   | MET | 34 | 24.546-130.083 | 7.169  | 1.00 | 0.00 |
| C    |      |     |     |    |                |        |      |      |
| ATOM | 9740 | O   | MET | 34 | 24.191-131.247 | 7.201  | 1.00 | 0.00 |
| O    |      |     |     |    |                |        |      |      |
| ATOM | 9741 | N   | MET | 35 | 23.955-129.094 | 7.878  | 1.00 | 0.00 |
| N    |      |     |     |    |                |        |      |      |
| ATOM | 9742 | CA  | MET | 35 | 22.751-129.256 | 8.637  | 1.00 | 0.00 |
| C    |      |     |     |    |                |        |      |      |
| ATOM | 9743 | CB  | MET | 35 | 22.887-128.506 | 9.983  | 1.00 | 0.00 |
| C    |      |     |     |    |                |        |      |      |
| ATOM | 9744 | CG  | MET | 35 | 24.036-129.197 | 10.788 | 1.00 | 0.00 |
| C    |      |     |     |    |                |        |      |      |
| ATOM | 9745 | SD  | MET | 35 | 23.725-130.916 | 11.147 | 1.00 | 0.00 |
| S    |      |     |     |    |                |        |      |      |
| ATOM | 9746 | CE  | MET | 35 | 22.372-130.910 | 12.404 | 1.00 | 0.00 |
| C    |      |     |     |    |                |        |      |      |
| ATOM | 9747 | C   | MET | 35 | 21.583-128.658 | 7.851  | 1.00 | 0.00 |
| C    |      |     |     |    |                |        |      |      |
| ATOM | 9748 | O   | MET | 35 | 21.765-127.715 | 7.081  | 1.00 | 0.00 |
| O    |      |     |     |    |                |        |      |      |
| ATOM | 9749 | N   | PRO | 36 | 20.323-129.161 | 8.062  | 1.00 | 0.00 |
| N    |      |     |     |    |                |        |      |      |
| ATOM | 9750 | CD  | PRO | 36 | 19.133-128.690 | 7.367  | 1.00 | 0.00 |
| C    |      |     |     |    |                |        |      |      |
| ATOM | 9751 | CG  | PRO | 36 | 17.911-129.419 | 7.834  | 1.00 | 0.00 |
| C    |      |     |     |    |                |        |      |      |
| ATOM | 9752 | CB  | PRO | 36 | 18.355-129.921 | 9.189  | 1.00 | 0.00 |
| C    |      |     |     |    |                |        |      |      |
| ATOM | 9753 | CA  | PRO | 36 | 19.875-130.007 | 9.141  | 1.00 | 0.00 |
| C    |      |     |     |    |                |        |      |      |
| ATOM | 9754 | C   | PRO | 36 | 20.327-131.532 | 8.886  | 1.00 | 0.00 |
| C    |      |     |     |    |                |        |      |      |
| ATOM | 9755 | O   | PRO | 36 | 20.572-132.304 | 9.873  | 1.00 | 0.00 |
| O    |      |     |     |    |                |        |      |      |
| ATOM | 9756 | N   | ASN | 37 | 20.519-131.986 | 7.669  | 1.00 | 0.00 |
| N    |      |     |     |    |                |        |      |      |
| ATOM | 9757 | CA  | ASN | 37 | 20.694-133.408 | 7.414  | 1.00 | 0.00 |
| C    |      |     |     |    |                |        |      |      |
| ATOM | 9758 | CB  | ASN | 37 | 20.184-133.809 | 5.992  | 1.00 | 0.00 |
| C    |      |     |     |    |                |        |      |      |
| ATOM | 9759 | CG  | ASN | 37 | 18.799-133.281 | 5.646  | 1.00 | 0.00 |
| C    |      |     |     |    |                |        |      |      |
| ATOM | 9760 | OD1 | ASN | 37 | 17.903-133.148 | 6.492  | 1.00 | 0.00 |
| O    |      |     |     |    |                |        |      |      |
| ATOM | 9761 | ND2 | ASN | 37 | 18.509-132.976 | 4.457  | 1.00 | 0.00 |
| N    |      |     |     |    |                |        |      |      |
| ATOM | 9762 | C   | ASN | 37 | 22.050-134.142 | 7.794  | 1.00 | 0.00 |
| C    |      |     |     |    |                |        |      |      |
| ATOM | 9763 | O   | ASN | 37 | 22.294-135.293 | 7.391  | 1.00 | 0.00 |
| O    |      |     |     |    |                |        |      |      |
| ATOM | 9764 | N   | LYS | 38 | 22.898-133.487 | 8.558  | 1.00 | 0.00 |
| N    |      |     |     |    |                |        |      |      |

|      |      |     |     |    |                |        |      |      |
|------|------|-----|-----|----|----------------|--------|------|------|
| ATOM | 9765 | CA  | LYS | 38 | 24.134-134.039 | 9.137  | 1.00 | 0.00 |
| C    |      |     |     |    |                |        |      |      |
| ATOM | 9766 | CB  | LYS | 38 | 23.725-134.832 | 10.371 | 1.00 | 0.00 |
| C    |      |     |     |    |                |        |      |      |
| ATOM | 9767 | CG  | LYS | 38 | 24.940-135.182 | 11.251 | 1.00 | 0.00 |
| C    |      |     |     |    |                |        |      |      |
| ATOM | 9768 | CD  | LYS | 38 | 24.521-135.707 | 12.629 | 1.00 | 0.00 |
| C    |      |     |     |    |                |        |      |      |
| ATOM | 9769 | CE  | LYS | 38 | 23.526-136.884 | 12.558 | 1.00 | 0.00 |
| C    |      |     |     |    |                |        |      |      |
| ATOM | 9770 | NZ  | LYS | 38 | 22.977-137.221 | 13.923 | 1.00 | 0.00 |
| N1+  |      |     |     |    |                |        |      |      |
| ATOM | 9771 | C   | LYS | 38 | 25.052-134.708 | 8.038  | 1.00 | 0.00 |
| C    |      |     |     |    |                |        |      |      |
| ATOM | 9772 | O   | LYS | 38 | 25.611-135.858 | 8.184  | 1.00 | 0.00 |
| O    |      |     |     |    |                |        |      |      |
| ATOM | 9773 | N   | HIE | 39 | 25.212-134.021 | 6.896  | 1.00 | 0.00 |
| N    |      |     |     |    |                |        |      |      |
| ATOM | 9774 | CA  | HIE | 39 | 25.991-134.474 | 5.718  | 1.00 | 0.00 |
| C    |      |     |     |    |                |        |      |      |
| ATOM | 9775 | CB  | HIE | 39 | 25.227-134.495 | 4.405  | 1.00 | 0.00 |
| C    |      |     |     |    |                |        |      |      |
| ATOM | 9776 | CG  | HIE | 39 | 25.985-134.881 | 3.149  | 1.00 | 0.00 |
| C    |      |     |     |    |                |        |      |      |
| ATOM | 9777 | ND1 | HIE | 39 | 26.395-136.170 | 2.840  | 1.00 | 0.00 |
| N    |      |     |     |    |                |        |      |      |
| ATOM | 9778 | CE1 | HIE | 39 | 26.973-136.183 | 1.667  | 1.00 | 0.00 |
| C    |      |     |     |    |                |        |      |      |
| ATOM | 9779 | NE2 | HIE | 39 | 26.891-134.970 | 1.056  | 1.00 | 0.00 |
| N    |      |     |     |    |                |        |      |      |
| ATOM | 9780 | CD2 | HIE | 39 | 26.353-134.114 | 2.035  | 1.00 | 0.00 |
| C    |      |     |     |    |                |        |      |      |
| ATOM | 9781 | C   | HIE | 39 | 27.354-133.801 | 5.473  | 1.00 | 0.00 |
| C    |      |     |     |    |                |        |      |      |
| ATOM | 9782 | O   | HIE | 39 | 27.502-132.596 | 5.291  | 1.00 | 0.00 |
| O    |      |     |     |    |                |        |      |      |
| ATOM | 9783 | N   | ASN | 40 | 28.443-134.575 | 5.222  | 1.00 | 0.00 |
| N    |      |     |     |    |                |        |      |      |
| ATOM | 9784 | CA  | ASN | 40 | 29.784-134.055 | 4.933  | 1.00 | 0.00 |
| C    |      |     |     |    |                |        |      |      |
| ATOM | 9785 | CB  | ASN | 40 | 30.724-135.198 | 5.258  | 1.00 | 0.00 |
| C    |      |     |     |    |                |        |      |      |
| ATOM | 9786 | CG  | ASN | 40 | 31.112-135.214 | 6.739  | 1.00 | 0.00 |
| C    |      |     |     |    |                |        |      |      |
| ATOM | 9787 | OD1 | ASN | 40 | 32.100-134.663 | 7.200  | 1.00 | 0.00 |
| O    |      |     |     |    |                |        |      |      |
| ATOM | 9788 | ND2 | ASN | 40 | 30.298-135.845 | 7.522  | 1.00 | 0.00 |
| N    |      |     |     |    |                |        |      |      |
| ATOM | 9789 | C   | ASN | 40 | 30.053-133.619 | 3.494  | 1.00 | 0.00 |
| C    |      |     |     |    |                |        |      |      |
| ATOM | 9790 | O   | ASN | 40 | 29.915-134.326 | 2.495  | 1.00 | 0.00 |
| O    |      |     |     |    |                |        |      |      |
| ATOM | 9791 | N   | VAL | 41 | 30.599-132.415 | 3.362  | 1.00 | 0.00 |
| N    |      |     |     |    |                |        |      |      |

|      |      |     |     |    |                |        |      |      |
|------|------|-----|-----|----|----------------|--------|------|------|
| ATOM | 9792 | CA  | VAL | 41 | 31.162-131.857 | 2.134  | 1.00 | 0.00 |
| C    |      |     |     |    |                |        |      |      |
| ATOM | 9793 | CB  | VAL | 41 | 30.150-130.823 | 1.533  | 1.00 | 0.00 |
| C    |      |     |     |    |                |        |      |      |
| ATOM | 9794 | CG1 | VAL | 41 | 28.758-131.419 | 1.191  | 1.00 | 0.00 |
| C    |      |     |     |    |                |        |      |      |
| ATOM | 9795 | CG2 | VAL | 41 | 29.803-129.677 | 2.534  | 1.00 | 0.00 |
| C    |      |     |     |    |                |        |      |      |
| ATOM | 9796 | C   | VAL | 41 | 32.503-131.130 | 2.330  | 1.00 | 0.00 |
| C    |      |     |     |    |                |        |      |      |
| ATOM | 9797 | O   | VAL | 41 | 32.972-131.021 | 3.442  | 1.00 | 0.00 |
| O    |      |     |     |    |                |        |      |      |
| ATOM | 9798 | N   | GLU | 42 | 33.091-130.627 | 1.273  | 1.00 | 0.00 |
| N    |      |     |     |    |                |        |      |      |
| ATOM | 9799 | CA  | GLU | 42 | 34.518-130.214 | 1.149  | 1.00 | 0.00 |
| C    |      |     |     |    |                |        |      |      |
| ATOM | 9800 | CB  | GLU | 42 | 35.380-131.530 | 1.009  | 1.00 | 0.00 |
| C    |      |     |     |    |                |        |      |      |
| ATOM | 9801 | CG  | GLU | 42 | 36.912-131.221 | 1.108  | 1.00 | 0.00 |
| C    |      |     |     |    |                |        |      |      |
| ATOM | 9802 | CD  | GLU | 42 | 37.805-132.459 | 0.981  | 1.00 | 0.00 |
| C    |      |     |     |    |                |        |      |      |
| ATOM | 9803 | OE1 | GLU | 42 | 37.319-133.624 | 0.995  | 1.00 | 0.00 |
| O    |      |     |     |    |                |        |      |      |
| ATOM | 9804 | OE2 | GLU | 42 | 39.049-132.267 | 0.913  | 1.00 | 0.00 |
| O1-  |      |     |     |    |                |        |      |      |
| ATOM | 9805 | C   | GLU | 42 | 34.676-129.167 | 0.018  | 1.00 | 0.00 |
| C    |      |     |     |    |                |        |      |      |
| ATOM | 9806 | O   | GLU | 42 | 34.062-129.307 | -1.015 | 1.00 | 0.00 |
| O    |      |     |     |    |                |        |      |      |
| ATOM | 9807 | N   | VAL | 43 | 35.438-128.178 | 0.345  | 1.00 | 0.00 |
| N    |      |     |     |    |                |        |      |      |
| ATOM | 9808 | CA  | VAL | 43 | 35.381-126.927 | -0.371 | 1.00 | 0.00 |
| C    |      |     |     |    |                |        |      |      |
| ATOM | 9809 | CB  | VAL | 43 | 35.487-125.680 | 0.523  | 1.00 | 0.00 |
| C    |      |     |     |    |                |        |      |      |
| ATOM | 9810 | CG1 | VAL | 43 | 35.927-124.351 | -0.144 | 1.00 | 0.00 |
| C    |      |     |     |    |                |        |      |      |
| ATOM | 9811 | CG2 | VAL | 43 | 34.139-125.406 | 1.191  | 1.00 | 0.00 |
| C    |      |     |     |    |                |        |      |      |
| ATOM | 9812 | C   | VAL | 43 | 36.591-126.891 | -1.360 | 1.00 | 0.00 |
| C    |      |     |     |    |                |        |      |      |
| ATOM | 9813 | O   | VAL | 43 | 37.719-127.235 | -1.055 | 1.00 | 0.00 |
| O    |      |     |     |    |                |        |      |      |
| ATOM | 9814 | N   | LEU | 44 | 36.255-126.503 | -2.582 | 1.00 | 0.00 |
| N    |      |     |     |    |                |        |      |      |
| ATOM | 9815 | CA  | LEU | 44 | 37.181-126.528 | -3.700 | 1.00 | 0.00 |
| C    |      |     |     |    |                |        |      |      |
| ATOM | 9816 | CB  | LEU | 44 | 36.393-127.286 | -4.815 | 1.00 | 0.00 |
| C    |      |     |     |    |                |        |      |      |
| ATOM | 9817 | CG  | LEU | 44 | 37.133-127.301 | -6.147 | 1.00 | 0.00 |
| C    |      |     |     |    |                |        |      |      |
| ATOM | 9818 | CD1 | LEU | 44 | 38.528-127.966 | -6.144 | 1.00 | 0.00 |
| C    |      |     |     |    |                |        |      |      |

|      |      |     |     |    |                |        |      |      |
|------|------|-----|-----|----|----------------|--------|------|------|
| ATOM | 9819 | CD2 | LEU | 44 | 36.234-128.038 | -7.169 | 1.00 | 0.00 |
| C    |      |     |     |    |                |        |      |      |
| ATOM | 9820 | C   | LEU | 44 | 37.645-125.103 | -4.086 | 1.00 | 0.00 |
| C    |      |     |     |    |                |        |      |      |
| ATOM | 9821 | O   | LEU | 44 | 38.678-124.990 | -4.716 | 1.00 | 0.00 |
| O    |      |     |     |    |                |        |      |      |
| ATOM | 9822 | N   | GLY | 45 | 36.922-124.040 | -3.743 | 1.00 | 0.00 |
| N    |      |     |     |    |                |        |      |      |
| ATOM | 9823 | CA  | GLY | 45 | 37.187-122.662 | -4.274 | 1.00 | 0.00 |
| C    |      |     |     |    |                |        |      |      |
| ATOM | 9824 | C   | GLY | 45 | 36.050-121.650 | -4.093 | 1.00 | 0.00 |
| C    |      |     |     |    |                |        |      |      |
| ATOM | 9825 | O   | GLY | 45 | 34.999-122.008 | -3.548 | 1.00 | 0.00 |
| O    |      |     |     |    |                |        |      |      |
| ATOM | 9826 | N   | ILE | 46 | 36.181-120.428 | -4.570 | 1.00 | 0.00 |
| N    |      |     |     |    |                |        |      |      |
| ATOM | 9827 | CA  | ILE | 46 | 35.106-119.360 | -4.586 | 1.00 | 0.00 |
| C    |      |     |     |    |                |        |      |      |
| ATOM | 9828 | CB  | ILE | 46 | 35.469-118.353 | -3.489 | 1.00 | 0.00 |
| C    |      |     |     |    |                |        |      |      |
| ATOM | 9829 | CG2 | ILE | 46 | 34.523-117.136 | -3.490 | 1.00 | 0.00 |
| C    |      |     |     |    |                |        |      |      |
| ATOM | 9830 | CG1 | ILE | 46 | 35.365-118.911 | -2.047 | 1.00 | 0.00 |
| C    |      |     |     |    |                |        |      |      |
| ATOM | 9831 | CD1 | ILE | 46 | 36.741-119.089 | -1.458 | 1.00 | 0.00 |
| C    |      |     |     |    |                |        |      |      |
| ATOM | 9832 | C   | ILE | 46 | 35.110-118.684 | -5.954 | 1.00 | 0.00 |
| C    |      |     |     |    |                |        |      |      |
| ATOM | 9833 | O   | ILE | 46 | 36.165-118.615 | -6.577 | 1.00 | 0.00 |
| O    |      |     |     |    |                |        |      |      |
| ATOM | 9834 | N   | LEU | 47 | 33.941-118.305 | -6.536 | 1.00 | 0.00 |
| N    |      |     |     |    |                |        |      |      |
| ATOM | 9835 | CA  | LEU | 47 | 33.776-117.466 | -7.751 | 1.00 | 0.00 |
| C    |      |     |     |    |                |        |      |      |
| ATOM | 9836 | CB  | LEU | 47 | 32.309-117.442 | -8.208 | 1.00 | 0.00 |
| C    |      |     |     |    |                |        |      |      |
| ATOM | 9837 | CG  | LEU | 47 | 31.896-118.656 | -9.069 | 1.00 | 0.00 |
| C    |      |     |     |    |                |        |      |      |
| ATOM | 9838 | CD1 | LEU | 47 | 32.049-119.967 | -8.314 | 1.00 | 0.00 |
| C    |      |     |     |    |                |        |      |      |
| ATOM | 9839 | CD2 | LEU | 47 | 30.439-118.505 | -9.453 | 1.00 | 0.00 |
| C    |      |     |     |    |                |        |      |      |
| ATOM | 9840 | C   | LEU | 47 | 34.327-116.069 | -7.438 | 1.00 | 0.00 |
| C    |      |     |     |    |                |        |      |      |
| ATOM | 9841 | O   | LEU | 47 | 34.053-115.411 | -6.381 | 1.00 | 0.00 |
| O    |      |     |     |    |                |        |      |      |
| ATOM | 9842 | N   | SER | 48 | 35.186-115.610 | -8.383 | 1.00 | 0.00 |
| N    |      |     |     |    |                |        |      |      |
| ATOM | 9843 | CA  | SER | 48 | 35.891-114.421 | -8.273 | 1.00 | 0.00 |
| C    |      |     |     |    |                |        |      |      |
| ATOM | 9844 | CB  | SER | 48 | 37.132-114.240 | -9.183 | 1.00 | 0.00 |
| C    |      |     |     |    |                |        |      |      |
| ATOM | 9845 | OG  | SER | 48 | 37.999-113.283 | -8.669 | 1.00 | 0.00 |
| O    |      |     |     |    |                |        |      |      |



|      |      |     |     |    |                |        |      |      |
|------|------|-----|-----|----|----------------|--------|------|------|
| ATOM | 9846 | C   | SER | 48 | 34.959-113.191 | -8.439 | 1.00 | 0.00 |
| C    |      |     |     |    |                |        |      |      |
| ATOM | 9847 | O   | SER | 48 | 34.307-113.000 | -9.505 | 1.00 | 0.00 |
| O    |      |     |     |    |                |        |      |      |
| ATOM | 9848 | N   | ASP | 49 | 34.919-112.341 | -7.455 | 1.00 | 0.00 |
| N    |      |     |     |    |                |        |      |      |
| ATOM | 9849 | CA  | ASP | 49 | 34.191-111.005 | -7.466 | 1.00 | 0.00 |
| C    |      |     |     |    |                |        |      |      |
| ATOM | 9850 | CB  | ASP | 49 | 33.683-110.665 | -6.049 | 1.00 | 0.00 |
| C    |      |     |     |    |                |        |      |      |
| ATOM | 9851 | CG  | ASP | 49 | 32.506-111.586 | -5.759 | 1.00 | 0.00 |
| C    |      |     |     |    |                |        |      |      |
| ATOM | 9852 | OD1 | ASP | 49 | 32.601-112.836 | -5.894 | 1.00 | 0.00 |
| O    |      |     |     |    |                |        |      |      |
| ATOM | 9853 | OD2 | ASP | 49 | 31.462-111.072 | -5.328 | 1.00 | 0.00 |
| O1-  |      |     |     |    |                |        |      |      |
| ATOM | 9854 | C   | ASP | 49 | 35.079-109.825 | -7.834 | 1.00 | 0.00 |
| C    |      |     |     |    |                |        |      |      |
| ATOM | 9855 | O   | ASP | 49 | 34.569-108.742 | -8.110 | 1.00 | 0.00 |
| O    |      |     |     |    |                |        |      |      |
| ATOM | 9856 | N   | ASP | 50 | 36.385-109.964 | -7.870 | 1.00 | 0.00 |
| N    |      |     |     |    |                |        |      |      |
| ATOM | 9857 | CA  | ASP | 50 | 37.467-108.946 | -7.769 | 1.00 | 0.00 |
| C    |      |     |     |    |                |        |      |      |
| ATOM | 9858 | CB  | ASP | 50 | 37.427-108.208 | -6.395 | 1.00 | 0.00 |
| C    |      |     |     |    |                |        |      |      |
| ATOM | 9859 | CG  | ASP | 50 | 38.365-107.046 | -6.281 | 1.00 | 0.00 |
| C    |      |     |     |    |                |        |      |      |
| ATOM | 9860 | OD1 | ASP | 50 | 38.982-106.965 | -5.183 | 1.00 | 0.00 |
| O    |      |     |     |    |                |        |      |      |
| ATOM | 9861 | OD2 | ASP | 50 | 38.347-106.144 | -7.168 | 1.00 | 0.00 |
| O1-  |      |     |     |    |                |        |      |      |
| ATOM | 9862 | C   | ASP | 50 | 38.840-109.644 | -8.010 | 1.00 | 0.00 |
| C    |      |     |     |    |                |        |      |      |
| ATOM | 9863 | O   | ASP | 50 | 39.572-109.109 | -8.875 | 1.00 | 0.00 |
| O    |      |     |     |    |                |        |      |      |
| ATOM | 9864 | N   | VAL | 51 | 39.264-110.613 | -7.165 | 1.00 | 0.00 |
| N    |      |     |     |    |                |        |      |      |
| ATOM | 9865 | CA  | VAL | 51 | 40.603-111.234 | -7.138 | 1.00 | 0.00 |
| C    |      |     |     |    |                |        |      |      |
| ATOM | 9866 | CB  | VAL | 51 | 41.707-110.367 | -6.529 | 1.00 | 0.00 |
| C    |      |     |     |    |                |        |      |      |
| ATOM | 9867 | CG1 | VAL | 51 | 41.567-110.117 | -5.072 | 1.00 | 0.00 |
| C    |      |     |     |    |                |        |      |      |
| ATOM | 9868 | CG2 | VAL | 51 | 43.101-110.873 | -6.812 | 1.00 | 0.00 |
| C    |      |     |     |    |                |        |      |      |
| ATOM | 9869 | C   | VAL | 51 | 40.432-112.563 | -6.379 | 1.00 | 0.00 |
| C    |      |     |     |    |                |        |      |      |
| ATOM | 9870 | O   | VAL | 51 | 39.437-112.891 | -5.694 | 1.00 | 0.00 |
| O    |      |     |     |    |                |        |      |      |
| ATOM | 9871 | N   | GLU | 52 | 41.440-113.445 | -6.502 | 1.00 | 0.00 |
| N    |      |     |     |    |                |        |      |      |
| ATOM | 9872 | CA  | GLU | 52 | 41.360-114.955 | -6.209 | 1.00 | 0.00 |
| C    |      |     |     |    |                |        |      |      |

|      |      |     |     |    |                |         |      |      |
|------|------|-----|-----|----|----------------|---------|------|------|
| ATOM | 9873 | CB  | GLU | 52 | 42.320-115.829 | -7.019  | 1.00 | 0.00 |
| C    |      |     |     |    |                |         |      |      |
| ATOM | 9874 | CG  | GLU | 52 | 42.434-115.376 | -8.521  | 1.00 | 0.00 |
| C    |      |     |     |    |                |         |      |      |
| ATOM | 9875 | CD  | GLU | 52 | 41.179-115.413 | -9.359  | 1.00 | 0.00 |
| C    |      |     |     |    |                |         |      |      |
| ATOM | 9876 | OE1 | GLU | 52 | 40.456-114.434 | -9.340  | 1.00 | 0.00 |
| O    |      |     |     |    |                |         |      |      |
| ATOM | 9877 | OE2 | GLU | 52 | 40.982-116.246 | -10.286 | 1.00 | 0.00 |
| O1-  |      |     |     |    |                |         |      |      |
| ATOM | 9878 | C   | GLU | 52 | 41.431-115.188 | -4.776  | 1.00 | 0.00 |
| C    |      |     |     |    |                |         |      |      |
| ATOM | 9879 | O   | GLU | 52 | 42.256-114.605 | -4.077  | 1.00 | 0.00 |
| O    |      |     |     |    |                |         |      |      |
| ATOM | 9880 | N   | THR | 53 | 40.629-116.065 | -4.305  | 1.00 | 0.00 |
| N    |      |     |     |    |                |         |      |      |
| ATOM | 9881 | CA  | THR | 53 | 40.567-116.366 | -2.896  | 1.00 | 0.00 |
| C    |      |     |     |    |                |         |      |      |
| ATOM | 9882 | CB  | THR | 53 | 39.405-115.648 | -2.098  | 1.00 | 0.00 |
| C    |      |     |     |    |                |         |      |      |
| ATOM | 9883 | CG2 | THR | 53 | 39.693-114.139 | -2.216  | 1.00 | 0.00 |
| C    |      |     |     |    |                |         |      |      |
| ATOM | 9884 | OG1 | THR | 53 | 38.136-115.916 | -2.616  | 1.00 | 0.00 |
| O    |      |     |     |    |                |         |      |      |
| ATOM | 9885 | C   | THR | 53 | 40.520-117.879 | -2.720  | 1.00 | 0.00 |
| C    |      |     |     |    |                |         |      |      |
| ATOM | 9886 | O   | THR | 53 | 39.910-118.627 | -3.413  | 1.00 | 0.00 |
| O    |      |     |     |    |                |         |      |      |
| ATOM | 9887 | N   | ASP | 54 | 41.131-118.337 | -1.589  | 1.00 | 0.00 |
| N    |      |     |     |    |                |         |      |      |
| ATOM | 9888 | CA  | ASP | 54 | 41.133-119.747 | -1.136  | 1.00 | 0.00 |
| C    |      |     |     |    |                |         |      |      |
| ATOM | 9889 | CB  | ASP | 54 | 42.545-120.354 | -1.101  | 1.00 | 0.00 |
| C    |      |     |     |    |                |         |      |      |
| ATOM | 9890 | CG  | ASP | 54 | 43.502-119.726 | -0.010  | 1.00 | 0.00 |
| C    |      |     |     |    |                |         |      |      |
| ATOM | 9891 | OD1 | ASP | 54 | 43.109-118.868 | 0.780   | 1.00 | 0.00 |
| O    |      |     |     |    |                |         |      |      |
| ATOM | 9892 | OD2 | ASP | 54 | 44.647-120.281 | 0.002   | 1.00 | 0.00 |
| O1-  |      |     |     |    |                |         |      |      |
| ATOM | 9893 | C   | ASP | 54 | 40.360-119.892 | 0.242   | 1.00 | 0.00 |
| C    |      |     |     |    |                |         |      |      |
| ATOM | 9894 | O   | ASP | 54 | 40.258-120.996 | 0.783   | 1.00 | 0.00 |
| O    |      |     |     |    |                |         |      |      |
| ATOM | 9895 | N   | THR | 55 | 39.890-118.814 | 0.732   | 1.00 | 0.00 |
| N    |      |     |     |    |                |         |      |      |
| ATOM | 9896 | CA  | THR | 55 | 39.389-118.700 | 2.077   | 1.00 | 0.00 |
| C    |      |     |     |    |                |         |      |      |
| ATOM | 9897 | CB  | THR | 55 | 40.398-118.325 | 3.196   | 1.00 | 0.00 |
| C    |      |     |     |    |                |         |      |      |
| ATOM | 9898 | CG2 | THR | 55 | 39.941-118.487 | 4.693   | 1.00 | 0.00 |
| C    |      |     |     |    |                |         |      |      |
| ATOM | 9899 | OG1 | THR | 55 | 41.656-118.975 | 3.113   | 1.00 | 0.00 |
| O    |      |     |     |    |                |         |      |      |

|      |      |     |     |    |                |       |      |      |
|------|------|-----|-----|----|----------------|-------|------|------|
| ATOM | 9900 | C   | THR | 55 | 38.296-117.683 | 1.999 | 1.00 | 0.00 |
| C    |      |     |     |    |                |       |      |      |
| ATOM | 9901 | O   | THR | 55 | 38.489-116.593 | 1.436 | 1.00 | 0.00 |
| O    |      |     |     |    |                |       |      |      |
| ATOM | 9902 | N   | VAL | 56 | 37.099-118.057 | 2.582 | 1.00 | 0.00 |
| N    |      |     |     |    |                |       |      |      |
| ATOM | 9903 | CA  | VAL | 56 | 35.929-117.138 | 2.539 | 1.00 | 0.00 |
| C    |      |     |     |    |                |       |      |      |
| ATOM | 9904 | CB  | VAL | 56 | 34.524-117.837 | 2.862 | 1.00 | 0.00 |
| C    |      |     |     |    |                |       |      |      |
| ATOM | 9905 | CG1 | VAL | 56 | 33.411-116.742 | 2.835 | 1.00 | 0.00 |
| C    |      |     |     |    |                |       |      |      |
| ATOM | 9906 | CG2 | VAL | 56 | 34.124-119.014 | 2.049 | 1.00 | 0.00 |
| C    |      |     |     |    |                |       |      |      |
| ATOM | 9907 | C   | VAL | 56 | 36.121-115.880 | 3.322 | 1.00 | 0.00 |
| C    |      |     |     |    |                |       |      |      |
| ATOM | 9908 | O   | VAL | 56 | 36.393-116.046 | 4.518 | 1.00 | 0.00 |
| O    |      |     |     |    |                |       |      |      |
| ATOM | 9909 | N   | ALA | 57 | 36.029-114.687 | 2.789 | 1.00 | 0.00 |
| N    |      |     |     |    |                |       |      |      |
| ATOM | 9910 | CA  | ALA | 57 | 36.011-113.394 | 3.582 | 1.00 | 0.00 |
| C    |      |     |     |    |                |       |      |      |
| ATOM | 9911 | CB  | ALA | 57 | 36.401-112.171 | 2.697 | 1.00 | 0.00 |
| C    |      |     |     |    |                |       |      |      |
| ATOM | 9912 | C   | ALA | 57 | 34.640-112.998 | 4.288 | 1.00 | 0.00 |
| C    |      |     |     |    |                |       |      |      |
| ATOM | 9913 | O   | ALA | 57 | 33.639-113.156 | 3.561 | 1.00 | 0.00 |
| O    |      |     |     |    |                |       |      |      |
| ATOM | 9914 | N   | PRO | 58 | 34.536-112.653 | 5.611 | 1.00 | 0.00 |
| N    |      |     |     |    |                |       |      |      |
| ATOM | 9915 | CD  | PRO | 58 | 35.660-112.611 | 6.563 | 1.00 | 0.00 |
| C    |      |     |     |    |                |       |      |      |
| ATOM | 9916 | CG  | PRO | 58 | 35.178-112.058 | 7.832 | 1.00 | 0.00 |
| C    |      |     |     |    |                |       |      |      |
| ATOM | 9917 | CB  | PRO | 58 | 33.663-112.161 | 7.648 | 1.00 | 0.00 |
| C    |      |     |     |    |                |       |      |      |
| ATOM | 9918 | CA  | PRO | 58 | 33.248-112.295 | 6.152 | 1.00 | 0.00 |
| C    |      |     |     |    |                |       |      |      |
| ATOM | 9919 | C   | PRO | 58 | 32.538-111.021 | 5.554 | 1.00 | 0.00 |
| C    |      |     |     |    |                |       |      |      |
| ATOM | 9920 | O   | PRO | 58 | 33.106-110.053 | 5.038 | 1.00 | 0.00 |
| O    |      |     |     |    |                |       |      |      |
| ATOM | 9921 | N   | GLY | 59 | 31.270-110.955 | 5.808 | 1.00 | 0.00 |
| N    |      |     |     |    |                |       |      |      |
| ATOM | 9922 | CA  | GLY | 59 | 30.431-109.787 | 5.351 | 1.00 | 0.00 |
| C    |      |     |     |    |                |       |      |      |
| ATOM | 9923 | C   | GLY | 59 | 29.950-109.776 | 3.940 | 1.00 | 0.00 |
| C    |      |     |     |    |                |       |      |      |
| ATOM | 9924 | O   | GLY | 59 | 29.462-108.745 | 3.489 | 1.00 | 0.00 |
| O    |      |     |     |    |                |       |      |      |
| ATOM | 9925 | N   | GLU | 60 | 30.027-110.867 | 3.213 | 1.00 | 0.00 |
| N    |      |     |     |    |                |       |      |      |
| ATOM | 9926 | CA  | GLU | 60 | 29.713-110.870 | 1.774 | 1.00 | 0.00 |
| C    |      |     |     |    |                |       |      |      |

|      |      |     |     |    |                |        |      |      |
|------|------|-----|-----|----|----------------|--------|------|------|
| ATOM | 9927 | CB  | GLU | 60 | 30.987-110.735 | 0.890  | 1.00 | 0.00 |
| C    |      |     |     |    |                |        |      |      |
| ATOM | 9928 | CG  | GLU | 60 | 31.701-109.350 | 0.814  | 1.00 | 0.00 |
| C    |      |     |     |    |                |        |      |      |
| ATOM | 9929 | CD  | GLU | 60 | 30.671-108.190 | 0.490  | 1.00 | 0.00 |
| C    |      |     |     |    |                |        |      |      |
| ATOM | 9930 | OE1 | GLU | 60 | 30.954-107.030 | 0.976  | 1.00 | 0.00 |
| O    |      |     |     |    |                |        |      |      |
| ATOM | 9931 | OE2 | GLU | 60 | 29.734-108.439 | -0.293 | 1.00 | 0.00 |
| O1-  |      |     |     |    |                |        |      |      |
| ATOM | 9932 | C   | GLU | 60 | 29.079-112.200 | 1.384  | 1.00 | 0.00 |
| C    |      |     |     |    |                |        |      |      |
| ATOM | 9933 | O   | GLU | 60 | 29.510-113.246 | 1.842  | 1.00 | 0.00 |
| O    |      |     |     |    |                |        |      |      |
| ATOM | 9934 | N   | ASN | 61 | 28.011-112.170 | 0.606  | 1.00 | 0.00 |
| N    |      |     |     |    |                |        |      |      |
| ATOM | 9935 | CA  | ASN | 61 | 27.309-113.378 | 0.207  | 1.00 | 0.00 |
| C    |      |     |     |    |                |        |      |      |
| ATOM | 9936 | CB  | ASN | 61 | 25.888-113.061 | -0.160 | 1.00 | 0.00 |
| C    |      |     |     |    |                |        |      |      |
| ATOM | 9937 | CG  | ASN | 61 | 24.964-113.075 | 0.996  | 1.00 | 0.00 |
| C    |      |     |     |    |                |        |      |      |
| ATOM | 9938 | OD1 | ASN | 61 | 24.458-114.091 | 1.383  | 1.00 | 0.00 |
| O    |      |     |     |    |                |        |      |      |
| ATOM | 9939 | ND2 | ASN | 61 | 24.777-111.981 | 1.581  | 1.00 | 0.00 |
| N    |      |     |     |    |                |        |      |      |
| ATOM | 9940 | C   | ASN | 61 | 28.146-113.809 | -1.019 | 1.00 | 0.00 |
| C    |      |     |     |    |                |        |      |      |
| ATOM | 9941 | O   | ASN | 61 | 28.080-113.191 | -2.040 | 1.00 | 0.00 |
| O    |      |     |     |    |                |        |      |      |
| ATOM | 9942 | N   | LEU | 62 | 28.889-114.884 | -0.808 | 1.00 | 0.00 |
| N    |      |     |     |    |                |        |      |      |
| ATOM | 9943 | CA  | LEU | 62 | 30.011-115.485 | -1.698 | 1.00 | 0.00 |
| C    |      |     |     |    |                |        |      |      |
| ATOM | 9944 | CB  | LEU | 62 | 31.402-115.476 | -0.900 | 1.00 | 0.00 |
| C    |      |     |     |    |                |        |      |      |
| ATOM | 9945 | CG  | LEU | 62 | 31.884-114.041 | -0.749 | 1.00 | 0.00 |
| C    |      |     |     |    |                |        |      |      |
| ATOM | 9946 | CD1 | LEU | 62 | 33.139-114.111 | 0.128  | 1.00 | 0.00 |
| C    |      |     |     |    |                |        |      |      |
| ATOM | 9947 | CD2 | LEU | 62 | 32.312-113.425 | -2.094 | 1.00 | 0.00 |
| C    |      |     |     |    |                |        |      |      |
| ATOM | 9948 | C   | LEU | 62 | 29.565-116.887 | -2.182 | 1.00 | 0.00 |
| C    |      |     |     |    |                |        |      |      |
| ATOM | 9949 | O   | LEU | 62 | 28.755-117.543 | -1.551 | 1.00 | 0.00 |
| O    |      |     |     |    |                |        |      |      |
| ATOM | 9950 | N   | LYS | 63 | 30.092-117.300 | -3.386 | 1.00 | 0.00 |
| N    |      |     |     |    |                |        |      |      |
| ATOM | 9951 | CA  | LYS | 63 | 29.690-118.458 | -4.204 | 1.00 | 0.00 |
| C    |      |     |     |    |                |        |      |      |
| ATOM | 9952 | CB  | LYS | 63 | 29.361-117.980 | -5.661 | 1.00 | 0.00 |
| C    |      |     |     |    |                |        |      |      |
| ATOM | 9953 | CG  | LYS | 63 | 28.111-117.160 | -5.659 | 1.00 | 0.00 |
| C    |      |     |     |    |                |        |      |      |

|      |      |     |     |    |                |         |      |      |
|------|------|-----|-----|----|----------------|---------|------|------|
| ATOM | 9954 | CD  | LYS | 63 | 27.702-116.427 | -6.974  | 1.00 | 0.00 |
| C    |      |     |     |    |                |         |      |      |
| ATOM | 9955 | CE  | LYS | 63 | 28.708-115.452 | -7.582  | 1.00 | 0.00 |
| C    |      |     |     |    |                |         |      |      |
| ATOM | 9956 | NZ  | LYS | 63 | 28.271-114.071 | -7.242  | 1.00 | 0.00 |
| N1+  |      |     |     |    |                |         |      |      |
| ATOM | 9957 | C   | LYS | 63 | 30.663-119.642 | -4.121  | 1.00 | 0.00 |
| C    |      |     |     |    |                |         |      |      |
| ATOM | 9958 | O   | LYS | 63 | 31.619-119.559 | -4.937  | 1.00 | 0.00 |
| O    |      |     |     |    |                |         |      |      |
| ATOM | 9959 | N   | ILE | 64 | 30.607-120.562 | -3.184  | 1.00 | 0.00 |
| N    |      |     |     |    |                |         |      |      |
| ATOM | 9960 | CA  | ILE | 64 | 31.766-121.467 | -2.767  | 1.00 | 0.00 |
| C    |      |     |     |    |                |         |      |      |
| ATOM | 9961 | CB  | ILE | 64 | 31.579-121.706 | -1.243  | 1.00 | 0.00 |
| C    |      |     |     |    |                |         |      |      |
| ATOM | 9962 | CG2 | ILE | 64 | 32.676-122.599 | -0.691  | 1.00 | 0.00 |
| C    |      |     |     |    |                |         |      |      |
| ATOM | 9963 | CG1 | ILE | 64 | 31.736-120.315 | -0.518  | 1.00 | 0.00 |
| C    |      |     |     |    |                |         |      |      |
| ATOM | 9964 | CD1 | ILE | 64 | 30.398-119.829 | 0.082   | 1.00 | 0.00 |
| C    |      |     |     |    |                |         |      |      |
| ATOM | 9965 | C   | ILE | 64 | 31.593-122.731 | -3.595  | 1.00 | 0.00 |
| C    |      |     |     |    |                |         |      |      |
| ATOM | 9966 | O   | ILE | 64 | 30.548-123.351 | -3.465  | 1.00 | 0.00 |
| O    |      |     |     |    |                |         |      |      |
| ATOM | 9967 | N   | ARG | 65 | 32.618-123.033 | -4.363  | 1.00 | 0.00 |
| N    |      |     |     |    |                |         |      |      |
| ATOM | 9968 | CA  | ARG | 65 | 32.743-124.319 | -5.034  | 1.00 | 0.00 |
| C    |      |     |     |    |                |         |      |      |
| ATOM | 9969 | CB  | ARG | 65 | 33.909-124.381 | -6.095  | 1.00 | 0.00 |
| C    |      |     |     |    |                |         |      |      |
| ATOM | 9970 | CG  | ARG | 65 | 33.751-123.460 | -7.289  | 1.00 | 0.00 |
| C    |      |     |     |    |                |         |      |      |
| ATOM | 9971 | CD  | ARG | 65 | 34.807-123.824 | -8.402  | 1.00 | 0.00 |
| C    |      |     |     |    |                |         |      |      |
| ATOM | 9972 | NE  | ARG | 65 | 34.604-123.101 | -9.711  | 1.00 | 0.00 |
| N    |      |     |     |    |                |         |      |      |
| ATOM | 9973 | CZ  | ARG | 65 | 33.646-123.150 | -10.624 | 1.00 | 0.00 |
| C    |      |     |     |    |                |         |      |      |
| ATOM | 9974 | NH1 | ARG | 65 | 32.686-124.012 | -10.536 | 1.00 | 0.00 |
| N    |      |     |     |    |                |         |      |      |
| ATOM | 9975 | NH2 | ARG | 65 | 33.656-122.427 | -11.757 | 1.00 | 0.00 |
| N1+  |      |     |     |    |                |         |      |      |
| ATOM | 9976 | C   | ARG | 65 | 32.841-125.505 | -4.069  | 1.00 | 0.00 |
| C    |      |     |     |    |                |         |      |      |
| ATOM | 9977 | O   | ARG | 65 | 33.666-125.378 | -3.149  | 1.00 | 0.00 |
| O    |      |     |     |    |                |         |      |      |
| ATOM | 9978 | N   | LEU | 66 | 32.097-126.624 | -4.244  | 1.00 | 0.00 |
| N    |      |     |     |    |                |         |      |      |
| ATOM | 9979 | CA  | LEU | 66 | 32.179-127.834 | -3.353  | 1.00 | 0.00 |
| C    |      |     |     |    |                |         |      |      |
| ATOM | 9980 | CB  | LEU | 66 | 30.756-128.206 | -2.730  | 1.00 | 0.00 |
| C    |      |     |     |    |                |         |      |      |

|      |       |     |     |    |                |         |      |      |
|------|-------|-----|-----|----|----------------|---------|------|------|
| ATOM | 9981  | CG  | LEU | 66 | 30.197-127.137 | -1.805  | 1.00 | 0.00 |
| C    |       |     |     |    |                |         |      |      |
| ATOM | 9982  | CD1 | LEU | 66 | 28.828-127.448 | -1.259  | 1.00 | 0.00 |
| C    |       |     |     |    |                |         |      |      |
| ATOM | 9983  | CD2 | LEU | 66 | 31.099-126.989 | -0.593  | 1.00 | 0.00 |
| C    |       |     |     |    |                |         |      |      |
| ATOM | 9984  | C   | LEU | 66 | 32.751-129.063 | -4.230  | 1.00 | 0.00 |
| C    |       |     |     |    |                |         |      |      |
| ATOM | 9985  | O   | LEU | 66 | 32.463-129.134 | -5.436  | 1.00 | 0.00 |
| O    |       |     |     |    |                |         |      |      |
| ATOM | 9986  | N   | LYS | 67 | 33.498-130.033 | -3.627  | 1.00 | 0.00 |
| N    |       |     |     |    |                |         |      |      |
| ATOM | 9987  | CA  | LYS | 67 | 34.182-131.063 | -4.458  | 1.00 | 0.00 |
| C    |       |     |     |    |                |         |      |      |
| ATOM | 9988  | CB  | LYS | 67 | 35.148-131.875 | -3.469  | 1.00 | 0.00 |
| C    |       |     |     |    |                |         |      |      |
| ATOM | 9989  | CG  | LYS | 67 | 36.328-130.976 | -3.406  | 1.00 | 0.00 |
| C    |       |     |     |    |                |         |      |      |
| ATOM | 9990  | CD  | LYS | 67 | 37.444-131.750 | -2.574  | 1.00 | 0.00 |
| C    |       |     |     |    |                |         |      |      |
| ATOM | 9991  | CE  | LYS | 67 | 38.749-130.945 | -2.546  | 1.00 | 0.00 |
| C    |       |     |     |    |                |         |      |      |
| ATOM | 9992  | NZ  | LYS | 67 | 39.744-131.506 | -1.650  | 1.00 | 0.00 |
| N1+  |       |     |     |    |                |         |      |      |
| ATOM | 9993  | C   | LYS | 67 | 33.144-131.981 | -5.262  | 1.00 | 0.00 |
| C    |       |     |     |    |                |         |      |      |
| ATOM | 9994  | O   | LYS | 67 | 32.264-132.664 | -4.660  | 1.00 | 0.00 |
| O    |       |     |     |    |                |         |      |      |
| ATOM | 9995  | N   | GLY | 68 | 33.432-132.142 | -6.541  | 1.00 | 0.00 |
| N    |       |     |     |    |                |         |      |      |
| ATOM | 9996  | CA  | GLY | 68 | 32.506-132.867 | -7.407  | 1.00 | 0.00 |
| C    |       |     |     |    |                |         |      |      |
| ATOM | 9997  | C   | GLY | 68 | 31.045-132.300 | -7.436  | 1.00 | 0.00 |
| C    |       |     |     |    |                |         |      |      |
| ATOM | 9998  | O   | GLY | 68 | 30.623-131.326 | -6.799  | 1.00 | 0.00 |
| O    |       |     |     |    |                |         |      |      |
| ATOM | 9999  | N   | ILE | 69 | 30.207-132.943 | -8.178  | 1.00 | 0.00 |
| N    |       |     |     |    |                |         |      |      |
| ATOM | 10000 | CA  | ILE | 69 | 28.739-132.808 | -8.147  | 1.00 | 0.00 |
| C    |       |     |     |    |                |         |      |      |
| ATOM | 10001 | CB  | ILE | 69 | 27.989-133.261 | -9.430  | 1.00 | 0.00 |
| C    |       |     |     |    |                |         |      |      |
| ATOM | 10002 | CG2 | ILE | 69 | 26.518-132.966 | -9.444  | 1.00 | 0.00 |
| C    |       |     |     |    |                |         |      |      |
| ATOM | 10003 | CG1 | ILE | 69 | 28.618-132.548 | -10.672 | 1.00 | 0.00 |
| C    |       |     |     |    |                |         |      |      |
| ATOM | 10004 | CD1 | ILE | 69 | 28.428-133.230 | -12.002 | 1.00 | 0.00 |
| C    |       |     |     |    |                |         |      |      |
| ATOM | 10005 | C   | ILE | 69 | 28.199-133.684 | -6.923  | 1.00 | 0.00 |
| C    |       |     |     |    |                |         |      |      |
| ATOM | 10006 | O   | ILE | 69 | 28.383-134.896 | -6.909  | 1.00 | 0.00 |
| O    |       |     |     |    |                |         |      |      |
| ATOM | 10007 | N   | GLU | 70 | 27.596-133.027 | -5.915  | 1.00 | 0.00 |
| N    |       |     |     |    |                |         |      |      |

|      |       |     |     |    |                |        |      |      |
|------|-------|-----|-----|----|----------------|--------|------|------|
| ATOM | 10008 | CA  | GLU | 70 | 26.921-133.764 | -4.779 | 1.00 | 0.00 |
| C    |       |     |     |    |                |        |      |      |
| ATOM | 10009 | CB  | GLU | 70 | 26.575-132.817 | -3.582 | 1.00 | 0.00 |
| C    |       |     |     |    |                |        |      |      |
| ATOM | 10010 | CG  | GLU | 70 | 27.847-132.468 | -2.841 | 1.00 | 0.00 |
| C    |       |     |     |    |                |        |      |      |
| ATOM | 10011 | CD  | GLU | 70 | 28.528-133.582 | -2.146 | 1.00 | 0.00 |
| C    |       |     |     |    |                |        |      |      |
| ATOM | 10012 | OE1 | GLU | 70 | 27.900-134.526 | -1.661 | 1.00 | 0.00 |
| O    |       |     |     |    |                |        |      |      |
| ATOM | 10013 | OE2 | GLU | 70 | 29.760-133.719 | -2.144 | 1.00 | 0.00 |
| O1-  |       |     |     |    |                |        |      |      |
| ATOM | 10014 | C   | GLU | 70 | 25.614-134.496 | -5.256 | 1.00 | 0.00 |
| C    |       |     |     |    |                |        |      |      |
| ATOM | 10015 | O   | GLU | 70 | 24.777-133.959 | -6.032 | 1.00 | 0.00 |
| O    |       |     |     |    |                |        |      |      |
| ATOM | 10016 | N   | GLU | 71 | 25.528-135.745 | -4.813 | 1.00 | 0.00 |
| N    |       |     |     |    |                |        |      |      |
| ATOM | 10017 | CA  | GLU | 71 | 24.312-136.533 | -4.893 | 1.00 | 0.00 |
| C    |       |     |     |    |                |        |      |      |
| ATOM | 10018 | CB  | GLU | 71 | 24.666-138.051 | -4.819 | 1.00 | 0.00 |
| C    |       |     |     |    |                |        |      |      |
| ATOM | 10019 | CG  | GLU | 71 | 23.586-139.105 | -4.980 | 1.00 | 0.00 |
| C    |       |     |     |    |                |        |      |      |
| ATOM | 10020 | CD  | GLU | 71 | 22.692-138.973 | -6.244 | 1.00 | 0.00 |
| C    |       |     |     |    |                |        |      |      |
| ATOM | 10021 | OE1 | GLU | 71 | 21.535-139.400 | -6.199 | 1.00 | 0.00 |
| O    |       |     |     |    |                |        |      |      |
| ATOM | 10022 | OE2 | GLU | 71 | 23.130-138.517 | -7.331 | 1.00 | 0.00 |
| O1-  |       |     |     |    |                |        |      |      |
| ATOM | 10023 | C   | GLU | 71 | 23.296-136.167 | -3.887 | 1.00 | 0.00 |
| C    |       |     |     |    |                |        |      |      |
| ATOM | 10024 | O   | GLU | 71 | 22.123-136.354 | -4.191 | 1.00 | 0.00 |
| O    |       |     |     |    |                |        |      |      |
| ATOM | 10025 | N   | GLU | 72 | 23.755-135.654 | -2.805 | 1.00 | 0.00 |
| N    |       |     |     |    |                |        |      |      |
| ATOM | 10026 | CA  | GLU | 72 | 22.939-135.183 | -1.688 | 1.00 | 0.00 |
| C    |       |     |     |    |                |        |      |      |
| ATOM | 10027 | CB  | GLU | 72 | 23.758-134.938 | -0.395 | 1.00 | 0.00 |
| C    |       |     |     |    |                |        |      |      |
| ATOM | 10028 | CG  | GLU | 72 | 22.933-134.354 | 0.813  | 1.00 | 0.00 |
| C    |       |     |     |    |                |        |      |      |
| ATOM | 10029 | CD  | GLU | 72 | 21.879-135.374 | 1.280  | 1.00 | 0.00 |
| C    |       |     |     |    |                |        |      |      |
| ATOM | 10030 | OE1 | GLU | 72 | 22.120-136.506 | 1.819  | 1.00 | 0.00 |
| O    |       |     |     |    |                |        |      |      |
| ATOM | 10031 | OE2 | GLU | 72 | 20.689-135.031 | 1.108  | 1.00 | 0.00 |
| O1-  |       |     |     |    |                |        |      |      |
| ATOM | 10032 | C   | GLU | 72 | 22.090-133.921 | -2.151 | 1.00 | 0.00 |
| C    |       |     |     |    |                |        |      |      |
| ATOM | 10033 | O   | GLU | 72 | 22.509-133.170 | -3.046 | 1.00 | 0.00 |
| O    |       |     |     |    |                |        |      |      |
| ATOM | 10034 | N   | GLU | 73 | 20.970-133.666 | -1.495 | 1.00 | 0.00 |
| N    |       |     |     |    |                |        |      |      |

|      |       |     |     |    |                |        |      |      |
|------|-------|-----|-----|----|----------------|--------|------|------|
| ATOM | 10035 | CA  | GLU | 73 | 20.135-132.524 | -1.734 | 1.00 | 0.00 |
| C    |       |     |     |    |                |        |      |      |
| ATOM | 10036 | CB  | GLU | 73 | 18.689-132.925 | -1.286 | 1.00 | 0.00 |
| C    |       |     |     |    |                |        |      |      |
| ATOM | 10037 | CG  | GLU | 73 | 17.575-131.873 | -1.381 | 1.00 | 0.00 |
| C    |       |     |     |    |                |        |      |      |
| ATOM | 10038 | CD  | GLU | 73 | 17.315-131.366 | -2.754 | 1.00 | 0.00 |
| C    |       |     |     |    |                |        |      |      |
| ATOM | 10039 | OE1 | GLU | 73 | 18.305-131.391 | -3.553 | 1.00 | 0.00 |
| O    |       |     |     |    |                |        |      |      |
| ATOM | 10040 | OE2 | GLU | 73 | 16.151-131.131 | -3.097 | 1.00 | 0.00 |
| O1-  |       |     |     |    |                |        |      |      |
| ATOM | 10041 | C   | GLU | 73 | 20.626-131.236 | -1.032 | 1.00 | 0.00 |
| C    |       |     |     |    |                |        |      |      |
| ATOM | 10042 | O   | GLU | 73 | 21.213-131.279 | 0.066  | 1.00 | 0.00 |
| O    |       |     |     |    |                |        |      |      |
| ATOM | 10043 | N   | ILE | 74 | 20.428-130.128 | -1.721 | 1.00 | 0.00 |
| N    |       |     |     |    |                |        |      |      |
| ATOM | 10044 | CA  | ILE | 74 | 20.799-128.776 | -1.209 | 1.00 | 0.00 |
| C    |       |     |     |    |                |        |      |      |
| ATOM | 10045 | CB  | ILE | 74 | 22.186-128.323 | -1.682 | 1.00 | 0.00 |
| C    |       |     |     |    |                |        |      |      |
| ATOM | 10046 | CG2 | ILE | 74 | 22.655-127.079 | -0.867 | 1.00 | 0.00 |
| C    |       |     |     |    |                |        |      |      |
| ATOM | 10047 | CG1 | ILE | 74 | 23.312-129.350 | -1.651 | 1.00 | 0.00 |
| C    |       |     |     |    |                |        |      |      |
| ATOM | 10048 | CD1 | ILE | 74 | 24.516-128.979 | -2.582 | 1.00 | 0.00 |
| C    |       |     |     |    |                |        |      |      |
| ATOM | 10049 | C   | ILE | 74 | 19.749-127.729 | -1.407 | 1.00 | 0.00 |
| C    |       |     |     |    |                |        |      |      |
| ATOM | 10050 | O   | ILE | 74 | 19.079-127.810 | -2.440 | 1.00 | 0.00 |
| O    |       |     |     |    |                |        |      |      |
| ATOM | 10051 | N   | LEU | 75 | 19.531-126.847 | -0.455 | 1.00 | 0.00 |
| N    |       |     |     |    |                |        |      |      |
| ATOM | 10052 | CA  | LEU | 75 | 18.513-125.901 | -0.376 | 1.00 | 0.00 |
| C    |       |     |     |    |                |        |      |      |
| ATOM | 10053 | CB  | LEU | 75 | 17.176-126.478 | 0.180  | 1.00 | 0.00 |
| C    |       |     |     |    |                |        |      |      |
| ATOM | 10054 | CG  | LEU | 75 | 16.315-127.230 | -0.841 | 1.00 | 0.00 |
| C    |       |     |     |    |                |        |      |      |
| ATOM | 10055 | CD1 | LEU | 75 | 15.193-128.071 | -0.121 | 1.00 | 0.00 |
| C    |       |     |     |    |                |        |      |      |
| ATOM | 10056 | CD2 | LEU | 75 | 15.541-126.351 | -1.850 | 1.00 | 0.00 |
| C    |       |     |     |    |                |        |      |      |
| ATOM | 10057 | C   | LEU | 75 | 18.788-124.643 | 0.436  | 1.00 | 0.00 |
| C    |       |     |     |    |                |        |      |      |
| ATOM | 10058 | O   | LEU | 75 | 19.757-124.656 | 1.208  | 1.00 | 0.00 |
| O    |       |     |     |    |                |        |      |      |
| ATOM | 10059 | N   | PRO | 76 | 17.949-123.568 | 0.267  | 1.00 | 0.00 |
| N    |       |     |     |    |                |        |      |      |
| ATOM | 10060 | CD  | PRO | 76 | 17.210-123.247 | -0.971 | 1.00 | 0.00 |
| C    |       |     |     |    |                |        |      |      |
| ATOM | 10061 | CG  | PRO | 76 | 17.222-121.697 | -1.075 | 1.00 | 0.00 |
| C    |       |     |     |    |                |        |      |      |



|      |       |     |     |    |                |       |      |      |
|------|-------|-----|-----|----|----------------|-------|------|------|
| ATOM | 10062 | CB  | PRO | 76 | 17.079-121.296 | 0.328 | 1.00 | 0.00 |
| C    |       |     |     |    |                |       |      |      |
| ATOM | 10063 | CA  | PRO | 76 | 17.965-122.372 | 1.054 | 1.00 | 0.00 |
| C    |       |     |     |    |                |       |      |      |
| ATOM | 10064 | C   | PRO | 76 | 17.670-122.668 | 2.555 | 1.00 | 0.00 |
| C    |       |     |     |    |                |       |      |      |
| ATOM | 10065 | O   | PRO | 76 | 16.840-123.583 | 2.893 | 1.00 | 0.00 |
| O    |       |     |     |    |                |       |      |      |
| ATOM | 10066 | N   | GLY | 77 | 18.375-122.058 | 3.502 | 1.00 | 0.00 |
| N    |       |     |     |    |                |       |      |      |
| ATOM | 10067 | CA  | GLY | 77 | 18.169-122.237 | 4.950 | 1.00 | 0.00 |
| C    |       |     |     |    |                |       |      |      |
| ATOM | 10068 | C   | GLY | 77 | 18.859-123.501 | 5.526 | 1.00 | 0.00 |
| C    |       |     |     |    |                |       |      |      |
| ATOM | 10069 | O   | GLY | 77 | 18.904-123.609 | 6.764 | 1.00 | 0.00 |
| O    |       |     |     |    |                |       |      |      |
| ATOM | 10070 | N   | PHE | 78 | 19.316-124.475 | 4.728 | 1.00 | 0.00 |
| N    |       |     |     |    |                |       |      |      |
| ATOM | 10071 | CA  | PHE | 78 | 20.367-125.297 | 5.174 | 1.00 | 0.00 |
| C    |       |     |     |    |                |       |      |      |
| ATOM | 10072 | CB  | PHE | 78 | 20.740-126.409 | 4.143 | 1.00 | 0.00 |
| C    |       |     |     |    |                |       |      |      |
| ATOM | 10073 | CG  | PHE | 78 | 19.545-127.326 | 3.731 | 1.00 | 0.00 |
| C    |       |     |     |    |                |       |      |      |
| ATOM | 10074 | CD1 | PHE | 78 | 18.334-127.355 | 4.406 | 1.00 | 0.00 |
| C    |       |     |     |    |                |       |      |      |
| ATOM | 10075 | CE1 | PHE | 78 | 17.358-128.260 | 3.969 | 1.00 | 0.00 |
| C    |       |     |     |    |                |       |      |      |
| ATOM | 10076 | CZ  | PHE | 78 | 17.539-129.080 | 2.860 | 1.00 | 0.00 |
| C    |       |     |     |    |                |       |      |      |
| ATOM | 10077 | CE2 | PHE | 78 | 18.801-129.111 | 2.184 | 1.00 | 0.00 |
| C    |       |     |     |    |                |       |      |      |
| ATOM | 10078 | CD2 | PHE | 78 | 19.819-128.246 | 2.697 | 1.00 | 0.00 |
| C    |       |     |     |    |                |       |      |      |
| ATOM | 10079 | C   | PHE | 78 | 21.673-124.513 | 5.452 | 1.00 | 0.00 |
| C    |       |     |     |    |                |       |      |      |
| ATOM | 10080 | O   | PHE | 78 | 21.869-123.473 | 4.851 | 1.00 | 0.00 |
| O    |       |     |     |    |                |       |      |      |
| ATOM | 10081 | N   | ILE | 79 | 22.521-124.992 | 6.433 | 1.00 | 0.00 |
| N    |       |     |     |    |                |       |      |      |
| ATOM | 10082 | CA  | ILE | 79 | 23.767-124.445 | 6.969 | 1.00 | 0.00 |
| C    |       |     |     |    |                |       |      |      |
| ATOM | 10083 | CB  | ILE | 79 | 23.564-123.998 | 8.478 | 1.00 | 0.00 |
| C    |       |     |     |    |                |       |      |      |
| ATOM | 10084 | CG2 | ILE | 79 | 24.666-123.027 | 8.927 | 1.00 | 0.00 |
| C    |       |     |     |    |                |       |      |      |
| ATOM | 10085 | CG1 | ILE | 79 | 22.148-123.449 | 8.731 | 1.00 | 0.00 |
| C    |       |     |     |    |                |       |      |      |
| ATOM | 10086 | CD1 | ILE | 79 | 21.812-122.737 | 9.997 | 1.00 | 0.00 |
| C    |       |     |     |    |                |       |      |      |
| ATOM | 10087 | C   | ILE | 79 | 25.013-125.347 | 6.867 | 1.00 | 0.00 |
| C    |       |     |     |    |                |       |      |      |
| ATOM | 10088 | O   | ILE | 79 | 24.910-126.496 | 7.325 | 1.00 | 0.00 |
| O    |       |     |     |    |                |       |      |      |

|      |       |     |     |    |                |        |      |      |
|------|-------|-----|-----|----|----------------|--------|------|------|
| ATOM | 10089 | N   | LEU | 80 | 26.162-124.791 | 6.466  | 1.00 | 0.00 |
| N    |       |     |     |    |                |        |      |      |
| ATOM | 10090 | CA  | LEU | 80 | 27.476-125.488 | 6.578  | 1.00 | 0.00 |
| C    |       |     |     |    |                |        |      |      |
| ATOM | 10091 | CB  | LEU | 80 | 28.461-125.148 | 5.478  | 1.00 | 0.00 |
| C    |       |     |     |    |                |        |      |      |
| ATOM | 10092 | CG  | LEU | 80 | 27.967-125.270 | 3.992  | 1.00 | 0.00 |
| C    |       |     |     |    |                |        |      |      |
| ATOM | 10093 | CD1 | LEU | 80 | 29.002-124.858 | 2.966  | 1.00 | 0.00 |
| C    |       |     |     |    |                |        |      |      |
| ATOM | 10094 | CD2 | LEU | 80 | 27.516-126.704 | 3.563  | 1.00 | 0.00 |
| C    |       |     |     |    |                |        |      |      |
| ATOM | 10095 | C   | LEU | 80 | 27.971-125.192 | 8.016  | 1.00 | 0.00 |
| C    |       |     |     |    |                |        |      |      |
| ATOM | 10096 | O   | LEU | 80 | 28.205-124.039 | 8.380  | 1.00 | 0.00 |
| O    |       |     |     |    |                |        |      |      |
| ATOM | 10097 | N   | CYX | 81 | 28.020-126.194 | 8.878  | 1.00 | 0.00 |
| N    |       |     |     |    |                |        |      |      |
| ATOM | 10098 | CA  | CYX | 81 | 28.514-126.081 | 10.221 | 1.00 | 0.00 |
| C    |       |     |     |    |                |        |      |      |
| ATOM | 10099 | CB  | CYX | 81 | 27.501-126.698 | 11.213 | 1.00 | 0.00 |
| C    |       |     |     |    |                |        |      |      |
| ATOM | 10100 | SG  | CYX | 81 | 25.754-126.179 | 10.935 | 1.00 | 0.00 |
| S    |       |     |     |    |                |        |      |      |
| ATOM | 10101 | C   | CYX | 81 | 29.956-126.702 | 10.348 | 1.00 | 0.00 |
| C    |       |     |     |    |                |        |      |      |
| ATOM | 10102 | O   | CYX | 81 | 30.337-127.512 | 9.537  | 1.00 | 0.00 |
| O    |       |     |     |    |                |        |      |      |
| ATOM | 10103 | N   | ASP | 82 | 30.635-126.506 | 11.497 | 1.00 | 0.00 |
| N    |       |     |     |    |                |        |      |      |
| ATOM | 10104 | CA  | ASP | 82 | 31.737-127.305 | 12.059 | 1.00 | 0.00 |
| C    |       |     |     |    |                |        |      |      |
| ATOM | 10105 | CB  | ASP | 82 | 32.294-126.569 | 13.346 | 1.00 | 0.00 |
| C    |       |     |     |    |                |        |      |      |
| ATOM | 10106 | CG  | ASP | 82 | 33.540-127.125 | 14.042 | 1.00 | 0.00 |
| C    |       |     |     |    |                |        |      |      |
| ATOM | 10107 | OD1 | ASP | 82 | 33.991-126.568 | 15.046 | 1.00 | 0.00 |
| O    |       |     |     |    |                |        |      |      |
| ATOM | 10108 | OD2 | ASP | 82 | 34.108-128.063 | 13.560 | 1.00 | 0.00 |
| O1-  |       |     |     |    |                |        |      |      |
| ATOM | 10109 | C   | ASP | 82 | 31.213-128.706 | 12.481 | 1.00 | 0.00 |
| C    |       |     |     |    |                |        |      |      |
| ATOM | 10110 | O   | ASP | 82 | 30.338-128.811 | 13.406 | 1.00 | 0.00 |
| O    |       |     |     |    |                |        |      |      |
| ATOM | 10111 | N   | PRO | 83 | 31.883-129.795 | 11.982 | 1.00 | 0.00 |
| N    |       |     |     |    |                |        |      |      |
| ATOM | 10112 | CD  | PRO | 83 | 32.800-129.753 | 10.808 | 1.00 | 0.00 |
| C    |       |     |     |    |                |        |      |      |
| ATOM | 10113 | CG  | PRO | 83 | 32.862-131.091 | 10.302 | 1.00 | 0.00 |
| C    |       |     |     |    |                |        |      |      |
| ATOM | 10114 | CB  | PRO | 83 | 32.555-131.984 | 11.482 | 1.00 | 0.00 |
| C    |       |     |     |    |                |        |      |      |
| ATOM | 10115 | CA  | PRO | 83 | 31.579-131.201 | 12.265 | 1.00 | 0.00 |
| C    |       |     |     |    |                |        |      |      |

|      |       |     |     |    |                |        |      |      |
|------|-------|-----|-----|----|----------------|--------|------|------|
| ATOM | 10116 | C   | PRO | 83 | 31.681-131.449 | 13.800 | 1.00 | 0.00 |
| C    |       |     |     |    |                |        |      |      |
| ATOM | 10117 | O   | PRO | 83 | 31.042-132.303 | 14.411 | 1.00 | 0.00 |
| O    |       |     |     |    |                |        |      |      |
| ATOM | 10118 | N   | ASN | 84 | 32.425-130.596 | 14.497 | 1.00 | 0.00 |
| N    |       |     |     |    |                |        |      |      |
| ATOM | 10119 | CA  | ASN | 84 | 32.806-130.696 | 15.891 | 1.00 | 0.00 |
| C    |       |     |     |    |                |        |      |      |
| ATOM | 10120 | CB  | ASN | 84 | 34.301-130.285 | 16.091 | 1.00 | 0.00 |
| C    |       |     |     |    |                |        |      |      |
| ATOM | 10121 | CG  | ASN | 84 | 35.248-131.120 | 15.232 | 1.00 | 0.00 |
| C    |       |     |     |    |                |        |      |      |
| ATOM | 10122 | OD1 | ASN | 84 | 35.752-132.212 | 15.624 | 1.00 | 0.00 |
| O    |       |     |     |    |                |        |      |      |
| ATOM | 10123 | ND2 | ASN | 84 | 35.548-130.605 | 14.011 | 1.00 | 0.00 |
| N    |       |     |     |    |                |        |      |      |
| ATOM | 10124 | C   | ASN | 84 | 31.943-129.879 | 16.900 | 1.00 | 0.00 |
| C    |       |     |     |    |                |        |      |      |
| ATOM | 10125 | O   | ASN | 84 | 32.101-130.032 | 18.138 | 1.00 | 0.00 |
| O    |       |     |     |    |                |        |      |      |
| ATOM | 10126 | N   | ASN | 85 | 31.061-129.114 | 16.396 | 1.00 | 0.00 |
| N    |       |     |     |    |                |        |      |      |
| ATOM | 10127 | CA  | ASN | 85 | 30.188-128.066 | 16.987 | 1.00 | 0.00 |
| C    |       |     |     |    |                |        |      |      |
| ATOM | 10128 | CB  | ASN | 85 | 31.061-126.787 | 17.338 | 1.00 | 0.00 |
| C    |       |     |     |    |                |        |      |      |
| ATOM | 10129 | CG  | ASN | 85 | 30.311-125.827 | 18.234 | 1.00 | 0.00 |
| C    |       |     |     |    |                |        |      |      |
| ATOM | 10130 | OD1 | ASN | 85 | 29.382-125.140 | 17.802 | 1.00 | 0.00 |
| O    |       |     |     |    |                |        |      |      |
| ATOM | 10131 | ND2 | ASN | 85 | 30.660-125.793 | 19.479 | 1.00 | 0.00 |
| N    |       |     |     |    |                |        |      |      |
| ATOM | 10132 | C   | ASN | 85 | 28.913-127.822 | 16.129 | 1.00 | 0.00 |
| C    |       |     |     |    |                |        |      |      |
| ATOM | 10133 | O   | ASN | 85 | 28.737-126.700 | 15.622 | 1.00 | 0.00 |
| O    |       |     |     |    |                |        |      |      |
| ATOM | 10134 | N   | LEU | 86 | 28.142-128.859 | 15.790 | 1.00 | 0.00 |
| N    |       |     |     |    |                |        |      |      |
| ATOM | 10135 | CA  | LEU | 86 | 26.932-128.817 | 14.948 | 1.00 | 0.00 |
| C    |       |     |     |    |                |        |      |      |
| ATOM | 10136 | CB  | LEU | 86 | 26.138-130.148 | 14.965 | 1.00 | 0.00 |
| C    |       |     |     |    |                |        |      |      |
| ATOM | 10137 | CG  | LEU | 86 | 27.001-131.432 | 14.740 | 1.00 | 0.00 |
| C    |       |     |     |    |                |        |      |      |
| ATOM | 10138 | CD1 | LEU | 86 | 26.017-132.629 | 14.577 | 1.00 | 0.00 |
| C    |       |     |     |    |                |        |      |      |
| ATOM | 10139 | CD2 | LEU | 86 | 27.833-131.254 | 13.426 | 1.00 | 0.00 |
| C    |       |     |     |    |                |        |      |      |
| ATOM | 10140 | C   | LEU | 86 | 26.013-127.657 | 15.281 | 1.00 | 0.00 |
| C    |       |     |     |    |                |        |      |      |
| ATOM | 10141 | O   | LEU | 86 | 26.025-127.111 | 16.393 | 1.00 | 0.00 |
| O    |       |     |     |    |                |        |      |      |
| ATOM | 10142 | N   | CYX | 87 | 25.256-127.309 | 14.268 | 1.00 | 0.00 |
| N    |       |     |     |    |                |        |      |      |

|      |       |     |     |    |                |        |      |      |
|------|-------|-----|-----|----|----------------|--------|------|------|
| ATOM | 10143 | CA  | CYX | 87 | 24.115-126.494 | 14.417 | 1.00 | 0.00 |
| C    |       |     |     |    |                |        |      |      |
| ATOM | 10144 | CB  | CYX | 87 | 23.754-125.835 | 13.080 | 1.00 | 0.00 |
| C    |       |     |     |    |                |        |      |      |
| ATOM | 10145 | SG  | CYX | 87 | 25.229-124.977 | 12.512 | 1.00 | 0.00 |
| S    |       |     |     |    |                |        |      |      |
| ATOM | 10146 | C   | CYX | 87 | 22.906-127.280 | 14.969 | 1.00 | 0.00 |
| C    |       |     |     |    |                |        |      |      |
| ATOM | 10147 | O   | CYX | 87 | 22.653-128.409 | 14.536 | 1.00 | 0.00 |
| O    |       |     |     |    |                |        |      |      |
| ATOM | 10148 | N   | HIE | 88 | 22.138-126.651 | 15.844 | 1.00 | 0.00 |
| N    |       |     |     |    |                |        |      |      |
| ATOM | 10149 | CA  | HIE | 88 | 20.995-127.352 | 16.385 | 1.00 | 0.00 |
| C    |       |     |     |    |                |        |      |      |
| ATOM | 10150 | CB  | HIE | 88 | 20.424-126.693 | 17.613 | 1.00 | 0.00 |
| C    |       |     |     |    |                |        |      |      |
| ATOM | 10151 | CG  | HIE | 88 | 21.433-126.294 | 18.571 | 1.00 | 0.00 |
| C    |       |     |     |    |                |        |      |      |
| ATOM | 10152 | ND1 | HIE | 88 | 21.924-127.116 | 19.524 | 1.00 | 0.00 |
| N    |       |     |     |    |                |        |      |      |
| ATOM | 10153 | CE1 | HIE | 88 | 22.843-126.395 | 20.194 | 1.00 | 0.00 |
| C    |       |     |     |    |                |        |      |      |
| ATOM | 10154 | NE2 | HIE | 88 | 22.979-125.207 | 19.645 | 1.00 | 0.00 |
| N    |       |     |     |    |                |        |      |      |
| ATOM | 10155 | CD2 | HIE | 88 | 22.041-125.109 | 18.681 | 1.00 | 0.00 |
| C    |       |     |     |    |                |        |      |      |
| ATOM | 10156 | C   | HIE | 88 | 19.919-127.674 | 15.332 | 1.00 | 0.00 |
| C    |       |     |     |    |                |        |      |      |
| ATOM | 10157 | O   | HIE | 88 | 20.005-127.148 | 14.258 | 1.00 | 0.00 |
| O    |       |     |     |    |                |        |      |      |
| ATOM | 10158 | N   | SER | 89 | 18.905-128.477 | 15.568 | 1.00 | 0.00 |
| N    |       |     |     |    |                |        |      |      |
| ATOM | 10159 | CA  | SER | 89 | 17.718-128.625 | 14.731 | 1.00 | 0.00 |
| C    |       |     |     |    |                |        |      |      |
| ATOM | 10160 | CB  | SER | 89 | 18.106-129.739 | 13.680 | 1.00 | 0.00 |
| C    |       |     |     |    |                |        |      |      |
| ATOM | 10161 | OG  | SER | 89 | 17.077-130.085 | 12.778 | 1.00 | 0.00 |
| O    |       |     |     |    |                |        |      |      |
| ATOM | 10162 | C   | SER | 89 | 16.414-129.040 | 15.455 | 1.00 | 0.00 |
| C    |       |     |     |    |                |        |      |      |
| ATOM | 10163 | O   | SER | 89 | 16.437-129.637 | 16.548 | 1.00 | 0.00 |
| O    |       |     |     |    |                |        |      |      |
| ATOM | 10164 | N   | GLY | 90 | 15.350-128.749 | 14.772 | 1.00 | 0.00 |
| N    |       |     |     |    |                |        |      |      |
| ATOM | 10165 | CA  | GLY | 90 | 14.021-129.291 | 15.189 | 1.00 | 0.00 |
| C    |       |     |     |    |                |        |      |      |
| ATOM | 10166 | C   | GLY | 90 | 12.883-128.523 | 14.663 | 1.00 | 0.00 |
| C    |       |     |     |    |                |        |      |      |
| ATOM | 10167 | O   | GLY | 90 | 12.964-127.870 | 13.584 | 1.00 | 0.00 |
| O    |       |     |     |    |                |        |      |      |
| ATOM | 10168 | N   | ARG | 91 | 11.750-128.611 | 15.439 | 1.00 | 0.00 |
| N    |       |     |     |    |                |        |      |      |
| ATOM | 10169 | CA  | ARG | 91 | 10.463-128.118 | 14.989 | 1.00 | 0.00 |
| C    |       |     |     |    |                |        |      |      |

|      |       |     |     |    |                |        |      |      |
|------|-------|-----|-----|----|----------------|--------|------|------|
| ATOM | 10170 | CB  | ARG | 91 | 9.644-129.186  | 14.262 | 1.00 | 0.00 |
| C    |       |     |     |    |                |        |      |      |
| ATOM | 10171 | CG  | ARG | 91 | 9.329-130.336  | 15.122 | 1.00 | 0.00 |
| C    |       |     |     |    |                |        |      |      |
| ATOM | 10172 | CD  | ARG | 91 | 8.395-131.319  | 14.397 | 1.00 | 0.00 |
| C    |       |     |     |    |                |        |      |      |
| ATOM | 10173 | NE  | ARG | 91 | 6.992-130.793  | 14.552 | 1.00 | 0.00 |
| N    |       |     |     |    |                |        |      |      |
| ATOM | 10174 | CZ  | ARG | 91 | 6.167-131.026  | 15.555 | 1.00 | 0.00 |
| C    |       |     |     |    |                |        |      |      |
| ATOM | 10175 | NH1 | ARG | 91 | 6.468-131.764  | 16.599 | 1.00 | 0.00 |
| N    |       |     |     |    |                |        |      |      |
| ATOM | 10176 | NH2 | ARG | 91 | 5.015-130.422  | 15.517 | 1.00 | 0.00 |
| N1+  |       |     |     |    |                |        |      |      |
| ATOM | 10177 | C   | ARG | 91 | 9.635-127.252  | 15.902 | 1.00 | 0.00 |
| C    |       |     |     |    |                |        |      |      |
| ATOM | 10178 | O   | ARG | 91 | 8.529-126.808  | 15.495 | 1.00 | 0.00 |
| O    |       |     |     |    |                |        |      |      |
| ATOM | 10179 | N   | THR | 92 | 10.079-126.969 | 17.093 | 1.00 | 0.00 |
| N    |       |     |     |    |                |        |      |      |
| ATOM | 10180 | CA  | THR | 92 | 9.375-126.144  | 18.058 | 1.00 | 0.00 |
| C    |       |     |     |    |                |        |      |      |
| ATOM | 10181 | CB  | THR | 92 | 8.503-127.005  | 19.008 | 1.00 | 0.00 |
| C    |       |     |     |    |                |        |      |      |
| ATOM | 10182 | CG2 | THR | 92 | 7.135-127.604  | 18.484 | 1.00 | 0.00 |
| C    |       |     |     |    |                |        |      |      |
| ATOM | 10183 | OG1 | THR | 92 | 9.117-128.217  | 19.455 | 1.00 | 0.00 |
| O    |       |     |     |    |                |        |      |      |
| ATOM | 10184 | C   | THR | 92 | 10.332-125.282 | 18.851 | 1.00 | 0.00 |
| C    |       |     |     |    |                |        |      |      |
| ATOM | 10185 | O   | THR | 92 | 11.350-125.813 | 19.326 | 1.00 | 0.00 |
| O    |       |     |     |    |                |        |      |      |
| ATOM | 10186 | N   | PHE | 93 | 10.059-124.029 | 19.073 | 1.00 | 0.00 |
| N    |       |     |     |    |                |        |      |      |
| ATOM | 10187 | CA  | PHE | 93 | 10.917-123.187 | 19.893 | 1.00 | 0.00 |
| C    |       |     |     |    |                |        |      |      |
| ATOM | 10188 | CB  | PHE | 93 | 12.052-122.543 | 19.108 | 1.00 | 0.00 |
| C    |       |     |     |    |                |        |      |      |
| ATOM | 10189 | CG  | PHE | 93 | 11.603-121.842 | 17.820 | 1.00 | 0.00 |
| C    |       |     |     |    |                |        |      |      |
| ATOM | 10190 | CD1 | PHE | 93 | 11.291-120.455 | 17.825 | 1.00 | 0.00 |
| C    |       |     |     |    |                |        |      |      |
| ATOM | 10191 | CE1 | PHE | 93 | 11.045-119.841 | 16.561 | 1.00 | 0.00 |
| C    |       |     |     |    |                |        |      |      |
| ATOM | 10192 | CZ  | PHE | 93 | 11.106-120.631 | 15.328 | 1.00 | 0.00 |
| C    |       |     |     |    |                |        |      |      |
| ATOM | 10193 | CE2 | PHE | 93 | 11.332-122.009 | 15.455 | 1.00 | 0.00 |
| C    |       |     |     |    |                |        |      |      |
| ATOM | 10194 | CD2 | PHE | 93 | 11.531-122.666 | 16.652 | 1.00 | 0.00 |
| C    |       |     |     |    |                |        |      |      |
| ATOM | 10195 | C   | PHE | 93 | 10.144-122.152 | 20.752 | 1.00 | 0.00 |
| C    |       |     |     |    |                |        |      |      |
| ATOM | 10196 | O   | PHE | 93 | 8.997-121.822  | 20.471 | 1.00 | 0.00 |
| O    |       |     |     |    |                |        |      |      |

|      |       |     |     |    |                |        |      |      |
|------|-------|-----|-----|----|----------------|--------|------|------|
| ATOM | 10197 | N   | ASP | 94 | 10.911-121.560 | 21.665 | 1.00 | 0.00 |
| N    |       |     |     |    |                |        |      |      |
| ATOM | 10198 | CA  | ASP | 94 | 10.447-120.464 | 22.594 | 1.00 | 0.00 |
| C    |       |     |     |    |                |        |      |      |
| ATOM | 10199 | CB  | ASP | 94 | 10.864-120.766 | 24.044 | 1.00 | 0.00 |
| C    |       |     |     |    |                |        |      |      |
| ATOM | 10200 | CG  | ASP | 94 | 9.861-121.679  | 24.736 | 1.00 | 0.00 |
| C    |       |     |     |    |                |        |      |      |
| ATOM | 10201 | OD1 | ASP | 94 | 10.171-122.411 | 25.740 | 1.00 | 0.00 |
| O    |       |     |     |    |                |        |      |      |
| ATOM | 10202 | OD2 | ASP | 94 | 8.663-121.543  | 24.513 | 1.00 | 0.00 |
| O1-  |       |     |     |    |                |        |      |      |
| ATOM | 10203 | C   | ASP | 94 | 11.045-119.145 | 22.186 | 1.00 | 0.00 |
| C    |       |     |     |    |                |        |      |      |
| ATOM | 10204 | O   | ASP | 94 | 12.229-119.091 | 21.824 | 1.00 | 0.00 |
| O    |       |     |     |    |                |        |      |      |
| ATOM | 10205 | N   | ALA | 95 | 10.246-118.046 | 22.335 | 1.00 | 0.00 |
| N    |       |     |     |    |                |        |      |      |
| ATOM | 10206 | CA  | ALA | 95 | 10.764-116.777 | 21.819 | 1.00 | 0.00 |
| C    |       |     |     |    |                |        |      |      |
| ATOM | 10207 | CB  | ALA | 95 | 10.444-116.672 | 20.331 | 1.00 | 0.00 |
| C    |       |     |     |    |                |        |      |      |
| ATOM | 10208 | C   | ALA | 95 | 10.186-115.502 | 22.548 | 1.00 | 0.00 |
| C    |       |     |     |    |                |        |      |      |
| ATOM | 10209 | O   | ALA | 95 | 9.063-115.538  | 23.058 | 1.00 | 0.00 |
| O    |       |     |     |    |                |        |      |      |
| ATOM | 10210 | N   | GLN | 96 | 10.894-114.370 | 22.455 | 1.00 | 0.00 |
| N    |       |     |     |    |                |        |      |      |
| ATOM | 10211 | CA  | GLN | 96 | 10.312-113.067 | 22.517 | 1.00 | 0.00 |
| C    |       |     |     |    |                |        |      |      |
| ATOM | 10212 | CB  | GLN | 96 | 11.321-112.050 | 23.070 | 1.00 | 0.00 |
| C    |       |     |     |    |                |        |      |      |
| ATOM | 10213 | CG  | GLN | 96 | 11.833-112.412 | 24.463 | 1.00 | 0.00 |
| C    |       |     |     |    |                |        |      |      |
| ATOM | 10214 | CD  | GLN | 96 | 12.298-111.188 | 25.221 | 1.00 | 0.00 |
| C    |       |     |     |    |                |        |      |      |
| ATOM | 10215 | OE1 | GLN | 96 | 12.930-110.272 | 24.708 | 1.00 | 0.00 |
| O    |       |     |     |    |                |        |      |      |
| ATOM | 10216 | NE2 | GLN | 96 | 11.972-111.199 | 26.548 | 1.00 | 0.00 |
| N    |       |     |     |    |                |        |      |      |
| ATOM | 10217 | C   | GLN | 96 | 9.881-112.573  | 21.106 | 1.00 | 0.00 |
| C    |       |     |     |    |                |        |      |      |
| ATOM | 10218 | O   | GLN | 96 | 10.628-112.811 | 20.119 | 1.00 | 0.00 |
| O    |       |     |     |    |                |        |      |      |
| ATOM | 10219 | N   | ILE | 97 | 8.721-111.942  | 20.976 | 1.00 | 0.00 |
| N    |       |     |     |    |                |        |      |      |
| ATOM | 10220 | CA  | ILE | 97 | 8.266-111.274  | 19.784 | 1.00 | 0.00 |
| C    |       |     |     |    |                |        |      |      |
| ATOM | 10221 | CB  | ILE | 97 | 7.095-111.960  | 19.044 | 1.00 | 0.00 |
| C    |       |     |     |    |                |        |      |      |
| ATOM | 10222 | CG2 | ILE | 97 | 7.530-113.328  | 18.509 | 1.00 | 0.00 |
| C    |       |     |     |    |                |        |      |      |
| ATOM | 10223 | CG1 | ILE | 97 | 5.823-112.040  | 19.905 | 1.00 | 0.00 |
| C    |       |     |     |    |                |        |      |      |

|      |       |     |     |     |               |        |      |      |
|------|-------|-----|-----|-----|---------------|--------|------|------|
| ATOM | 10224 | CD1 | ILE | 97  | 4.610-112.569 | 19.152 | 1.00 | 0.00 |
| C    |       |     |     |     |               |        |      |      |
| ATOM | 10225 | C   | ILE | 97  | 7.948-109.743 | 20.084 | 1.00 | 0.00 |
| C    |       |     |     |     |               |        |      |      |
| ATOM | 10226 | O   | ILE | 97  | 7.636-109.311 | 21.214 | 1.00 | 0.00 |
| O    |       |     |     |     |               |        |      |      |
| ATOM | 10227 | N   | VAL | 98  | 8.176-108.983 | 19.030 | 1.00 | 0.00 |
| N    |       |     |     |     |               |        |      |      |
| ATOM | 10228 | CA  | VAL | 98  | 7.735-107.570 | 18.902 | 1.00 | 0.00 |
| C    |       |     |     |     |               |        |      |      |
| ATOM | 10229 | CB  | VAL | 98  | 8.944-106.604 | 18.883 | 1.00 | 0.00 |
| C    |       |     |     |     |               |        |      |      |
| ATOM | 10230 | CG1 | VAL | 98  | 9.929-106.872 | 17.742 | 1.00 | 0.00 |
| C    |       |     |     |     |               |        |      |      |
| ATOM | 10231 | CG2 | VAL | 98  | 8.491-105.140 | 18.838 | 1.00 | 0.00 |
| C    |       |     |     |     |               |        |      |      |
| ATOM | 10232 | C   | VAL | 98  | 6.824-107.408 | 17.691 | 1.00 | 0.00 |
| C    |       |     |     |     |               |        |      |      |
| ATOM | 10233 | O   | VAL | 98  | 7.087-107.847 | 16.570 | 1.00 | 0.00 |
| O    |       |     |     |     |               |        |      |      |
| ATOM | 10234 | N   | ILE | 99  | 5.636-106.837 | 18.063 | 1.00 | 0.00 |
| N    |       |     |     |     |               |        |      |      |
| ATOM | 10235 | CA  | ILE | 99  | 4.467-106.829 | 17.124 | 1.00 | 0.00 |
| C    |       |     |     |     |               |        |      |      |
| ATOM | 10236 | CB  | ILE | 99  | 3.126-106.794 | 17.877 | 1.00 | 0.00 |
| C    |       |     |     |     |               |        |      |      |
| ATOM | 10237 | CG2 | ILE | 99  | 1.944-106.836 | 16.901 | 1.00 | 0.00 |
| C    |       |     |     |     |               |        |      |      |
| ATOM | 10238 | CG1 | ILE | 99  | 2.986-107.905 | 18.941 | 1.00 | 0.00 |
| C    |       |     |     |     |               |        |      |      |
| ATOM | 10239 | CD1 | ILE | 99  | 3.224-109.320 | 18.441 | 1.00 | 0.00 |
| C    |       |     |     |     |               |        |      |      |
| ATOM | 10240 | C   | ILE | 99  | 4.642-105.613 | 16.227 | 1.00 | 0.00 |
| C    |       |     |     |     |               |        |      |      |
| ATOM | 10241 | O   | ILE | 99  | 5.167-104.578 | 16.588 | 1.00 | 0.00 |
| O    |       |     |     |     |               |        |      |      |
| ATOM | 10242 | N   | ILE | 100 | 4.374-105.824 | 14.942 | 1.00 | 0.00 |
| N    |       |     |     |     |               |        |      |      |
| ATOM | 10243 | CA  | ILE | 100 | 4.418-104.778 | 13.917 | 1.00 | 0.00 |
| C    |       |     |     |     |               |        |      |      |
| ATOM | 10244 | CB  | ILE | 100 | 5.514-105.140 | 12.868 | 1.00 | 0.00 |
| C    |       |     |     |     |               |        |      |      |
| ATOM | 10245 | CG2 | ILE | 100 | 5.486-104.266 | 11.685 | 1.00 | 0.00 |
| C    |       |     |     |     |               |        |      |      |
| ATOM | 10246 | CG1 | ILE | 100 | 6.945-105.087 | 13.590 | 1.00 | 0.00 |
| C    |       |     |     |     |               |        |      |      |
| ATOM | 10247 | CD1 | ILE | 100 | 8.252-105.401 | 12.791 | 1.00 | 0.00 |
| C    |       |     |     |     |               |        |      |      |
| ATOM | 10248 | C   | ILE | 100 | 3.057-104.501 | 13.322 | 1.00 | 0.00 |
| C    |       |     |     |     |               |        |      |      |
| ATOM | 10249 | O   | ILE | 100 | 2.253-105.435 | 13.122 | 1.00 | 0.00 |
| O    |       |     |     |     |               |        |      |      |
| ATOM | 10250 | N   | GLU | 101 | 2.678-103.273 | 12.973 | 1.00 | 0.00 |
| N    |       |     |     |     |               |        |      |      |

|      |       |     |     |     |                |        |      |      |
|------|-------|-----|-----|-----|----------------|--------|------|------|
| ATOM | 10251 | CA  | GLU | 101 | 1.325-103.020  | 12.463 | 1.00 | 0.00 |
| C    |       |     |     |     |                |        |      |      |
| ATOM | 10252 | CB  | GLU | 101 | 1.165-101.519  | 12.272 | 1.00 | 0.00 |
| C    |       |     |     |     |                |        |      |      |
| ATOM | 10253 | CG  | GLU | 101 | -0.078-100.924 | 11.668 | 1.00 | 0.00 |
| C    |       |     |     |     |                |        |      |      |
| ATOM | 10254 | CD  | GLU | 101 | -1.423-101.179 | 12.336 | 1.00 | 0.00 |
| C    |       |     |     |     |                |        |      |      |
| ATOM | 10255 | OE1 | GLU | 101 | -2.398-100.397 | 12.202 | 1.00 | 0.00 |
| O    |       |     |     |     |                |        |      |      |
| ATOM | 10256 | OE2 | GLU | 101 | -1.519-102.165 | 13.091 | 1.00 | 0.00 |
| O1-  |       |     |     |     |                |        |      |      |
| ATOM | 10257 | C   | GLU | 101 | 1.033-103.642  | 11.094 | 1.00 | 0.00 |
| C    |       |     |     |     |                |        |      |      |
| ATOM | 10258 | O   | GLU | 101 | 1.846-103.671  | 10.174 | 1.00 | 0.00 |
| O    |       |     |     |     |                |        |      |      |
| ATOM | 10259 | N   | HIE | 102 | -0.179-104.138 | 10.839 | 1.00 | 0.00 |
| N    |       |     |     |     |                |        |      |      |
| ATOM | 10260 | CA  | HIE | 102 | -0.459-105.000 | 9.660  | 1.00 | 0.00 |
| C    |       |     |     |     |                |        |      |      |
| ATOM | 10261 | CB  | HIE | 102 | 0.078-106.363  | 9.903  | 1.00 | 0.00 |
| C    |       |     |     |     |                |        |      |      |
| ATOM | 10262 | CG  | HIE | 102 | -0.017-107.347 | 8.734  | 1.00 | 0.00 |
| C    |       |     |     |     |                |        |      |      |
| ATOM | 10263 | ND1 | HIE | 102 | -0.882-108.430 | 8.602  | 1.00 | 0.00 |
| N    |       |     |     |     |                |        |      |      |
| ATOM | 10264 | CE1 | HIE | 102 | -0.385-109.176 | 7.558  | 1.00 | 0.00 |
| C    |       |     |     |     |                |        |      |      |
| ATOM | 10265 | NE2 | HIE | 102 | 0.613-108.489  | 6.973  | 1.00 | 0.00 |
| N    |       |     |     |     |                |        |      |      |
| ATOM | 10266 | CD2 | HIE | 102 | 0.910-107.384  | 7.750  | 1.00 | 0.00 |
| C    |       |     |     |     |                |        |      |      |
| ATOM | 10267 | C   | HIE | 102 | -1.923-104.929 | 9.262  | 1.00 | 0.00 |
| C    |       |     |     |     |                |        |      |      |
| ATOM | 10268 | O   | HIE | 102 | -2.755-104.450 | 10.076 | 1.00 | 0.00 |
| O    |       |     |     |     |                |        |      |      |
| ATOM | 10269 | N   | LYS | 103 | -2.311-105.517 | 8.186  | 1.00 | 0.00 |
| N    |       |     |     |     |                |        |      |      |
| ATOM | 10270 | CA  | LYS | 103 | -3.719-105.568 | 7.805  | 1.00 | 0.00 |
| C    |       |     |     |     |                |        |      |      |
| ATOM | 10271 | CB  | LYS | 103 | -3.847-106.111 | 6.365  | 1.00 | 0.00 |
| C    |       |     |     |     |                |        |      |      |
| ATOM | 10272 | CG  | LYS | 103 | -3.167-107.517 | 6.128  | 1.00 | 0.00 |
| C    |       |     |     |     |                |        |      |      |
| ATOM | 10273 | CD  | LYS | 103 | -3.391-107.782 | 4.630  | 1.00 | 0.00 |
| C    |       |     |     |     |                |        |      |      |
| ATOM | 10274 | CE  | LYS | 103 | -4.861-107.613 | 4.089  | 1.00 | 0.00 |
| C    |       |     |     |     |                |        |      |      |
| ATOM | 10275 | NZ  | LYS | 103 | -5.698-108.656 | 4.624  | 1.00 | 0.00 |
| N1+  |       |     |     |     |                |        |      |      |
| ATOM | 10276 | C   | LYS | 103 | -4.498-106.479 | 8.785  | 1.00 | 0.00 |
| C    |       |     |     |     |                |        |      |      |
| ATOM | 10277 | O   | LYS | 103 | -5.668-106.329 | 8.966  | 1.00 | 0.00 |
| O    |       |     |     |     |                |        |      |      |



|      |       |     |     |     |                |        |      |      |
|------|-------|-----|-----|-----|----------------|--------|------|------|
| ATOM | 10278 | N   | SER | 104 | -3.801-107.545 | 9.246  | 1.00 | 0.00 |
| N    |       |     |     |     |                |        |      |      |
| ATOM | 10279 | CA  | SER | 104 | -4.377-108.641 | 10.063 | 1.00 | 0.00 |
| C    |       |     |     |     |                |        |      |      |
| ATOM | 10280 | CB  | SER | 104 | -3.633-110.003 | 9.729  | 1.00 | 0.00 |
| C    |       |     |     |     |                |        |      |      |
| ATOM | 10281 | OG  | SER | 104 | -4.172-111.206 | 10.201 | 1.00 | 0.00 |
| O    |       |     |     |     |                |        |      |      |
| ATOM | 10282 | C   | SER | 104 | -4.357-108.331 | 11.523 | 1.00 | 0.00 |
| C    |       |     |     |     |                |        |      |      |
| ATOM | 10283 | O   | SER | 104 | -4.296-107.188 | 11.928 | 1.00 | 0.00 |
| O    |       |     |     |     |                |        |      |      |
| ATOM | 10284 | N   | ILE | 105 | -4.451-109.340 | 12.447 | 1.00 | 0.00 |
| N    |       |     |     |     |                |        |      |      |
| ATOM | 10285 | CA  | ILE | 105 | -4.142-109.268 | 13.904 | 1.00 | 0.00 |
| C    |       |     |     |     |                |        |      |      |
| ATOM | 10286 | CB  | ILE | 105 | -5.297-108.614 | 14.714 | 1.00 | 0.00 |
| C    |       |     |     |     |                |        |      |      |
| ATOM | 10287 | CG2 | ILE | 105 | -6.659-109.187 | 14.387 | 1.00 | 0.00 |
| C    |       |     |     |     |                |        |      |      |
| ATOM | 10288 | CG1 | ILE | 105 | -4.831-108.439 | 16.155 | 1.00 | 0.00 |
| C    |       |     |     |     |                |        |      |      |
| ATOM | 10289 | CD1 | ILE | 105 | -5.741-107.464 | 16.941 | 1.00 | 0.00 |
| C    |       |     |     |     |                |        |      |      |
| ATOM | 10290 | C   | ILE | 105 | -3.704-110.547 | 14.503 | 1.00 | 0.00 |
| C    |       |     |     |     |                |        |      |      |
| ATOM | 10291 | O   | ILE | 105 | -4.400-111.552 | 14.220 | 1.00 | 0.00 |
| O    |       |     |     |     |                |        |      |      |
| ATOM | 10292 | N   | ILE | 106 | -2.567-110.605 | 15.187 | 1.00 | 0.00 |
| N    |       |     |     |     |                |        |      |      |
| ATOM | 10293 | CA  | ILE | 106 | -2.036-111.872 | 15.773 | 1.00 | 0.00 |
| C    |       |     |     |     |                |        |      |      |
| ATOM | 10294 | CB  | ILE | 106 | -0.522-111.767 | 16.080 | 1.00 | 0.00 |
| C    |       |     |     |     |                |        |      |      |
| ATOM | 10295 | CG2 | ILE | 106 | -0.034-112.970 | 16.950 | 1.00 | 0.00 |
| C    |       |     |     |     |                |        |      |      |
| ATOM | 10296 | CG1 | ILE | 106 | 0.266-111.864  | 14.736 | 1.00 | 0.00 |
| C    |       |     |     |     |                |        |      |      |
| ATOM | 10297 | CD1 | ILE | 106 | 1.633-111.202  | 14.754 | 1.00 | 0.00 |
| C    |       |     |     |     |                |        |      |      |
| ATOM | 10298 | C   | ILE | 106 | -2.900-112.226 | 16.968 | 1.00 | 0.00 |
| C    |       |     |     |     |                |        |      |      |
| ATOM | 10299 | O   | ILE | 106 | -3.483-111.393 | 17.650 | 1.00 | 0.00 |
| O    |       |     |     |     |                |        |      |      |
| ATOM | 10300 | N   | CYS | 107 | -2.959-113.578 | 17.244 | 1.00 | 0.00 |
| N    |       |     |     |     |                |        |      |      |
| ATOM | 10301 | CA  | CYS | 107 | -3.673-114.300 | 18.271 | 1.00 | 0.00 |
| C    |       |     |     |     |                |        |      |      |
| ATOM | 10302 | CB  | CYS | 107 | -5.159-114.322 | 17.939 | 1.00 | 0.00 |
| C    |       |     |     |     |                |        |      |      |
| ATOM | 10303 | SG  | CYS | 107 | -5.519-115.329 | 16.484 | 1.00 | 0.00 |
| S    |       |     |     |     |                |        |      |      |
| ATOM | 10304 | C   | CYS | 107 | -2.967-115.617 | 18.594 | 1.00 | 0.00 |
| C    |       |     |     |     |                |        |      |      |

|      |       |     |     |     |        |          |        |      |      |
|------|-------|-----|-----|-----|--------|----------|--------|------|------|
| ATOM | 10305 | O   | CYS | 107 | -1.964 | -115.905 | 17.967 | 1.00 | 0.00 |
| O    |       |     |     |     |        |          |        |      |      |
| ATOM | 10306 | N   | PRO | 108 | -3.477 | -116.572 | 19.404 | 1.00 | 0.00 |
| N    |       |     |     |     |        |          |        |      |      |
| ATOM | 10307 | CD  | PRO | 108 | -4.430 | -116.257 | 20.519 | 1.00 | 0.00 |
| C    |       |     |     |     |        |          |        |      |      |
| ATOM | 10308 | CG  | PRO | 108 | -3.903 | -117.054 | 21.703 | 1.00 | 0.00 |
| C    |       |     |     |     |        |          |        |      |      |
| ATOM | 10309 | CB  | PRO | 108 | -3.456 | -118.330 | 21.059 | 1.00 | 0.00 |
| C    |       |     |     |     |        |          |        |      |      |
| ATOM | 10310 | CA  | PRO | 108 | -2.889 | -117.855 | 19.678 | 1.00 | 0.00 |
| C    |       |     |     |     |        |          |        |      |      |
| ATOM | 10311 | C   | PRO | 108 | -3.119 | -118.959 | 18.636 | 1.00 | 0.00 |
| C    |       |     |     |     |        |          |        |      |      |
| ATOM | 10312 | O   | PRO | 108 | -4.279 | -119.136 | 18.212 | 1.00 | 0.00 |
| O    |       |     |     |     |        |          |        |      |      |
| ATOM | 10313 | N   | GLY | 109 | -2.100 | -119.735 | 18.269 | 1.00 | 0.00 |
| N    |       |     |     |     |        |          |        |      |      |
| ATOM | 10314 | CA  | GLY | 109 | -2.179 | -120.646 | 17.132 | 1.00 | 0.00 |
| C    |       |     |     |     |        |          |        |      |      |
| ATOM | 10315 | C   | GLY | 109 | -2.102 | -120.067 | 15.783 | 1.00 | 0.00 |
| C    |       |     |     |     |        |          |        |      |      |
| ATOM | 10316 | O   | GLY | 109 | -2.463 | -120.716 | 14.807 | 1.00 | 0.00 |
| O    |       |     |     |     |        |          |        |      |      |
| ATOM | 10317 | N   | TYR | 110 | -1.678 | -118.853 | 15.586 | 1.00 | 0.00 |
| N    |       |     |     |     |        |          |        |      |      |
| ATOM | 10318 | CA  | TYR | 110 | -1.807 | -118.244 | 14.245 | 1.00 | 0.00 |
| C    |       |     |     |     |        |          |        |      |      |
| ATOM | 10319 | CB  | TYR | 110 | -1.836 | -116.738 | 14.511 | 1.00 | 0.00 |
| C    |       |     |     |     |        |          |        |      |      |
| ATOM | 10320 | CG  | TYR | 110 | -2.018 | -115.861 | 13.305 | 1.00 | 0.00 |
| C    |       |     |     |     |        |          |        |      |      |
| ATOM | 10321 | CD1 | TYR | 110 | -1.032 | -115.767 | 12.324 | 1.00 | 0.00 |
| C    |       |     |     |     |        |          |        |      |      |
| ATOM | 10322 | CE1 | TYR | 110 | -1.215 | -114.978 | 11.138 | 1.00 | 0.00 |
| C    |       |     |     |     |        |          |        |      |      |
| ATOM | 10323 | CZ  | TYR | 110 | -2.279 | -114.075 | 11.152 | 1.00 | 0.00 |
| C    |       |     |     |     |        |          |        |      |      |
| ATOM | 10324 | OH  | TYR | 110 | -2.536 | -113.365 | 10.012 | 1.00 | 0.00 |
| O    |       |     |     |     |        |          |        |      |      |
| ATOM | 10325 | CE2 | TYR | 110 | -3.267 | -114.098 | 12.176 | 1.00 | 0.00 |
| C    |       |     |     |     |        |          |        |      |      |
| ATOM | 10326 | CD2 | TYR | 110 | -3.139 | -115.026 | 13.189 | 1.00 | 0.00 |
| C    |       |     |     |     |        |          |        |      |      |
| ATOM | 10327 | C   | TYR | 110 | -0.839 | -118.761 | 13.201 | 1.00 | 0.00 |
| C    |       |     |     |     |        |          |        |      |      |
| ATOM | 10328 | O   | TYR | 110 | 0.300  | -118.878 | 13.519 | 1.00 | 0.00 |
| O    |       |     |     |     |        |          |        |      |      |
| ATOM | 10329 | N   | ASN | 111 | -1.248 | -119.162 | 11.986 | 1.00 | 0.00 |
| N    |       |     |     |     |        |          |        |      |      |
| ATOM | 10330 | CA  | ASN | 111 | -0.424 | -119.522 | 10.871 | 1.00 | 0.00 |
| C    |       |     |     |     |        |          |        |      |      |
| ATOM | 10331 | CB  | ASN | 111 | -1.139 | -120.587 | 10.050 | 1.00 | 0.00 |
| C    |       |     |     |     |        |          |        |      |      |

|      |       |     |     |     |                |        |      |      |
|------|-------|-----|-----|-----|----------------|--------|------|------|
| ATOM | 10332 | CG  | ASN | 111 | -0.246-121.378 | 9.125  | 1.00 | 0.00 |
| C    |       |     |     |     |                |        |      |      |
| ATOM | 10333 | OD1 | ASN | 111 | 0.179-120.871  | 8.079  | 1.00 | 0.00 |
| O    |       |     |     |     |                |        |      |      |
| ATOM | 10334 | ND2 | ASN | 111 | 0.056-122.710  | 9.383  | 1.00 | 0.00 |
| N    |       |     |     |     |                |        |      |      |
| ATOM | 10335 | C   | ASN | 111 | 0.202-118.437  | 9.928  | 1.00 | 0.00 |
| C    |       |     |     |     |                |        |      |      |
| ATOM | 10336 | O   | ASN | 111 | -0.532-117.709 | 9.244  | 1.00 | 0.00 |
| O    |       |     |     |     |                |        |      |      |
| ATOM | 10337 | N   | ALA | 112 | 1.539-118.412  | 9.816  | 1.00 | 0.00 |
| N    |       |     |     |     |                |        |      |      |
| ATOM | 10338 | CA  | ALA | 112 | 2.274-117.441  | 9.044  | 1.00 | 0.00 |
| C    |       |     |     |     |                |        |      |      |
| ATOM | 10339 | CB  | ALA | 112 | 2.698-116.331  | 10.100 | 1.00 | 0.00 |
| C    |       |     |     |     |                |        |      |      |
| ATOM | 10340 | C   | ALA | 112 | 3.541-118.038  | 8.446  | 1.00 | 0.00 |
| C    |       |     |     |     |                |        |      |      |
| ATOM | 10341 | O   | ALA | 112 | 3.757-119.245  | 8.465  | 1.00 | 0.00 |
| O    |       |     |     |     |                |        |      |      |
| ATOM | 10342 | N   | VAL | 113 | 4.332-117.209  | 7.819  | 1.00 | 0.00 |
| N    |       |     |     |     |                |        |      |      |
| ATOM | 10343 | CA  | VAL | 113 | 5.674-117.452  | 7.243  | 1.00 | 0.00 |
| C    |       |     |     |     |                |        |      |      |
| ATOM | 10344 | CB  | VAL | 113 | 5.826-116.571  | 5.971  | 1.00 | 0.00 |
| C    |       |     |     |     |                |        |      |      |
| ATOM | 10345 | CG1 | VAL | 113 | 7.066-116.819  | 5.130  | 1.00 | 0.00 |
| C    |       |     |     |     |                |        |      |      |
| ATOM | 10346 | CG2 | VAL | 113 | 4.614-116.571  | 5.047  | 1.00 | 0.00 |
| C    |       |     |     |     |                |        |      |      |
| ATOM | 10347 | C   | VAL | 113 | 6.753-117.014  | 8.274  | 1.00 | 0.00 |
| C    |       |     |     |     |                |        |      |      |
| ATOM | 10348 | O   | VAL | 113 | 6.768-115.856  | 8.667  | 1.00 | 0.00 |
| O    |       |     |     |     |                |        |      |      |
| ATOM | 10349 | N   | LEU | 114 | 7.607-117.919  | 8.678  | 1.00 | 0.00 |
| N    |       |     |     |     |                |        |      |      |
| ATOM | 10350 | CA  | LEU | 114 | 8.887-117.671  | 9.339  | 1.00 | 0.00 |
| C    |       |     |     |     |                |        |      |      |
| ATOM | 10351 | CB  | LEU | 114 | 9.328-119.020  | 10.017 | 1.00 | 0.00 |
| C    |       |     |     |     |                |        |      |      |
| ATOM | 10352 | CG  | LEU | 114 | 10.644-119.012 | 10.892 | 1.00 | 0.00 |
| C    |       |     |     |     |                |        |      |      |
| ATOM | 10353 | CD1 | LEU | 114 | 10.421-118.128 | 12.072 | 1.00 | 0.00 |
| C    |       |     |     |     |                |        |      |      |
| ATOM | 10354 | CD2 | LEU | 114 | 11.070-120.399 | 11.384 | 1.00 | 0.00 |
| C    |       |     |     |     |                |        |      |      |
| ATOM | 10355 | C   | LEU | 114 | 9.943-117.266  | 8.347  | 1.00 | 0.00 |
| C    |       |     |     |     |                |        |      |      |
| ATOM | 10356 | O   | LEU | 114 | 10.023-117.821 | 7.238  | 1.00 | 0.00 |
| O    |       |     |     |     |                |        |      |      |
| ATOM | 10357 | N   | HIE | 115 | 10.819-116.343 | 8.682  | 1.00 | 0.00 |
| N    |       |     |     |     |                |        |      |      |
| ATOM | 10358 | CA  | HIE | 115 | 12.114-116.037 | 8.001  | 1.00 | 0.00 |
| C    |       |     |     |     |                |        |      |      |

|      |       |     |     |     |                |        |      |      |
|------|-------|-----|-----|-----|----------------|--------|------|------|
| ATOM | 10359 | CB  | HIE | 115 | 11.918-114.801 | 7.086  | 1.00 | 0.00 |
| C    |       |     |     |     |                |        |      |      |
| ATOM | 10360 | CG  | HIE | 115 | 13.060-114.614 | 6.079  | 1.00 | 0.00 |
| C    |       |     |     |     |                |        |      |      |
| ATOM | 10361 | ND1 | HIE | 115 | 12.739-114.330 | 4.711  | 1.00 | 0.00 |
| N    |       |     |     |     |                |        |      |      |
| ATOM | 10362 | CE1 | HIE | 115 | 13.879-114.162 | 4.072  | 1.00 | 0.00 |
| C    |       |     |     |     |                |        |      |      |
| ATOM | 10363 | NE2 | HIE | 115 | 14.890-114.470 | 4.864  | 1.00 | 0.00 |
| N    |       |     |     |     |                |        |      |      |
| ATOM | 10364 | CD2 | HIE | 115 | 14.429-114.709 | 6.149  | 1.00 | 0.00 |
| C    |       |     |     |     |                |        |      |      |
| ATOM | 10365 | C   | HIE | 115 | 13.182-115.929 | 9.077  | 1.00 | 0.00 |
| C    |       |     |     |     |                |        |      |      |
| ATOM | 10366 | O   | HIE | 115 | 13.353-114.863 | 9.658  | 1.00 | 0.00 |
| O    |       |     |     |     |                |        |      |      |
| ATOM | 10367 | N   | ILE | 116 | 13.895-117.025 | 9.356  | 1.00 | 0.00 |
| N    |       |     |     |     |                |        |      |      |
| ATOM | 10368 | CA  | ILE | 116 | 14.942-117.145 | 10.413 | 1.00 | 0.00 |
| C    |       |     |     |     |                |        |      |      |
| ATOM | 10369 | CB  | ILE | 116 | 14.710-118.359 | 11.241 | 1.00 | 0.00 |
| C    |       |     |     |     |                |        |      |      |
| ATOM | 10370 | CG2 | ILE | 116 | 14.751-119.701 | 10.599 | 1.00 | 0.00 |
| C    |       |     |     |     |                |        |      |      |
| ATOM | 10371 | CG1 | ILE | 116 | 15.652-118.417 | 12.472 | 1.00 | 0.00 |
| C    |       |     |     |     |                |        |      |      |
| ATOM | 10372 | CD1 | ILE | 116 | 14.921-118.863 | 13.802 | 1.00 | 0.00 |
| C    |       |     |     |     |                |        |      |      |
| ATOM | 10373 | C   | ILE | 116 | 16.262-117.185 | 9.666  | 1.00 | 0.00 |
| C    |       |     |     |     |                |        |      |      |
| ATOM | 10374 | O   | ILE | 116 | 16.368-118.105 | 8.808  | 1.00 | 0.00 |
| O    |       |     |     |     |                |        |      |      |
| ATOM | 10375 | N   | HIE | 117 | 17.227-116.364 | 10.021 | 1.00 | 0.00 |
| N    |       |     |     |     |                |        |      |      |
| ATOM | 10376 | CA  | HIE | 117 | 18.568-116.355 | 9.364  | 1.00 | 0.00 |
| C    |       |     |     |     |                |        |      |      |
| ATOM | 10377 | CB  | HIE | 117 | 19.543-117.407 | 9.966  | 1.00 | 0.00 |
| C    |       |     |     |     |                |        |      |      |
| ATOM | 10378 | CG  | HIE | 117 | 19.153-118.887 | 10.054 | 1.00 | 0.00 |
| C    |       |     |     |     |                |        |      |      |
| ATOM | 10379 | ND1 | HIE | 117 | 19.095-119.785 | 8.982  | 1.00 | 0.00 |
| N    |       |     |     |     |                |        |      |      |
| ATOM | 10380 | CE1 | HIE | 117 | 18.830-120.981 | 9.532  | 1.00 | 0.00 |
| C    |       |     |     |     |                |        |      |      |
| ATOM | 10381 | NE2 | HIE | 117 | 18.662-120.903 | 10.849 | 1.00 | 0.00 |
| N    |       |     |     |     |                |        |      |      |
| ATOM | 10382 | CD2 | HIE | 117 | 18.994-119.651 | 11.264 | 1.00 | 0.00 |
| C    |       |     |     |     |                |        |      |      |
| ATOM | 10383 | C   | HIE | 117 | 18.423-116.233 | 7.896  | 1.00 | 0.00 |
| C    |       |     |     |     |                |        |      |      |
| ATOM | 10384 | O   | HIE | 117 | 17.974-115.189 | 7.422  | 1.00 | 0.00 |
| O    |       |     |     |     |                |        |      |      |
| ATOM | 10385 | N   | THR | 118 | 18.700-117.347 | 7.129  | 1.00 | 0.00 |
| N    |       |     |     |     |                |        |      |      |

|      |       |     |     |     |                |       |      |      |
|------|-------|-----|-----|-----|----------------|-------|------|------|
| ATOM | 10386 | CA  | THR | 118 | 18.249-117.569 | 5.697 | 1.00 | 0.00 |
| C    |       |     |     |     |                |       |      |      |
| ATOM | 10387 | CB  | THR | 118 | 19.478-117.821 | 4.821 | 1.00 | 0.00 |
| C    |       |     |     |     |                |       |      |      |
| ATOM | 10388 | CG2 | THR | 118 | 20.623-116.801 | 5.093 | 1.00 | 0.00 |
| C    |       |     |     |     |                |       |      |      |
| ATOM | 10389 | OG1 | THR | 118 | 19.969-119.143 | 5.155 | 1.00 | 0.00 |
| O    |       |     |     |     |                |       |      |      |
| ATOM | 10390 | C   | THR | 118 | 17.116-118.567 | 5.318 | 1.00 | 0.00 |
| C    |       |     |     |     |                |       |      |      |
| ATOM | 10391 | O   | THR | 118 | 16.710-118.625 | 4.156 | 1.00 | 0.00 |
| O    |       |     |     |     |                |       |      |      |
| ATOM | 10392 | N   | CYS | 119 | 16.626-119.272 | 6.326 | 1.00 | 0.00 |
| N    |       |     |     |     |                |       |      |      |
| ATOM | 10393 | CA  | CYS | 119 | 15.569-120.280 | 6.157 | 1.00 | 0.00 |
| C    |       |     |     |     |                |       |      |      |
| ATOM | 10394 | CB  | CYS | 119 | 15.803-121.220 | 7.325 | 1.00 | 0.00 |
| C    |       |     |     |     |                |       |      |      |
| ATOM | 10395 | SG  | CYS | 119 | 14.504-122.408 | 7.616 | 1.00 | 0.00 |
| S    |       |     |     |     |                |       |      |      |
| ATOM | 10396 | C   | CYS | 119 | 14.186-119.608 | 6.015 | 1.00 | 0.00 |
| C    |       |     |     |     |                |       |      |      |
| ATOM | 10397 | O   | CYS | 119 | 13.975-118.648 | 6.734 | 1.00 | 0.00 |
| O    |       |     |     |     |                |       |      |      |
| ATOM | 10398 | N   | ILE | 120 | 13.314-120.145 | 5.159 | 1.00 | 0.00 |
| N    |       |     |     |     |                |       |      |      |
| ATOM | 10399 | CA  | ILE | 120 | 11.892-119.909 | 5.182 | 1.00 | 0.00 |
| C    |       |     |     |     |                |       |      |      |
| ATOM | 10400 | CB  | ILE | 120 | 11.379-119.080 | 3.915 | 1.00 | 0.00 |
| C    |       |     |     |     |                |       |      |      |
| ATOM | 10401 | CG2 | ILE | 120 | 9.832-118.886  | 3.887 | 1.00 | 0.00 |
| C    |       |     |     |     |                |       |      |      |
| ATOM | 10402 | CG1 | ILE | 120 | 12.222-117.908 | 3.549 | 1.00 | 0.00 |
| C    |       |     |     |     |                |       |      |      |
| ATOM | 10403 | CD1 | ILE | 120 | 12.011-117.199 | 2.199 | 1.00 | 0.00 |
| C    |       |     |     |     |                |       |      |      |
| ATOM | 10404 | C   | ILE | 120 | 11.091-121.260 | 5.505 | 1.00 | 0.00 |
| C    |       |     |     |     |                |       |      |      |
| ATOM | 10405 | O   | ILE | 120 | 11.286-122.268 | 4.824 | 1.00 | 0.00 |
| O    |       |     |     |     |                |       |      |      |
| ATOM | 10406 | N   | GLU | 121 | 10.076-121.132 | 6.346 | 1.00 | 0.00 |
| N    |       |     |     |     |                |       |      |      |
| ATOM | 10407 | CA  | GLU | 121 | 9.053-122.147  | 6.643 | 1.00 | 0.00 |
| C    |       |     |     |     |                |       |      |      |
| ATOM | 10408 | CB  | GLU | 121 | 9.754-123.117  | 7.557 | 1.00 | 0.00 |
| C    |       |     |     |     |                |       |      |      |
| ATOM | 10409 | CG  | GLU | 121 | 9.032-124.446  | 7.975 | 1.00 | 0.00 |
| C    |       |     |     |     |                |       |      |      |
| ATOM | 10410 | CD  | GLU | 121 | 8.719-125.302  | 6.763 | 1.00 | 0.00 |
| C    |       |     |     |     |                |       |      |      |
| ATOM | 10411 | OE1 | GLU | 121 | 7.766-124.942  | 6.022 | 1.00 | 0.00 |
| O    |       |     |     |     |                |       |      |      |
| ATOM | 10412 | OE2 | GLU | 121 | 9.210-126.462  | 6.603 | 1.00 | 0.00 |
| O1-  |       |     |     |     |                |       |      |      |

|      |       |     |     |     |                |        |      |      |
|------|-------|-----|-----|-----|----------------|--------|------|------|
| ATOM | 10413 | C   | GLU | 121 | 7.677-121.629  | 7.250  | 1.00 | 0.00 |
| C    |       |     |     |     |                |        |      |      |
| ATOM | 10414 | O   | GLU | 121 | 7.519-120.457  | 7.648  | 1.00 | 0.00 |
| O    |       |     |     |     |                |        |      |      |
| ATOM | 10415 | N   | GLU | 122 | 6.647-122.486  | 7.091  | 1.00 | 0.00 |
| N    |       |     |     |     |                |        |      |      |
| ATOM | 10416 | CA  | GLU | 122 | 5.325-122.263  | 7.674  | 1.00 | 0.00 |
| C    |       |     |     |     |                |        |      |      |
| ATOM | 10417 | CB  | GLU | 122 | 4.323-123.014  | 6.858  | 1.00 | 0.00 |
| C    |       |     |     |     |                |        |      |      |
| ATOM | 10418 | CG  | GLU | 122 | 2.920-123.007  | 7.471  | 1.00 | 0.00 |
| C    |       |     |     |     |                |        |      |      |
| ATOM | 10419 | CD  | GLU | 122 | 2.003-124.042  | 6.739  | 1.00 | 0.00 |
| C    |       |     |     |     |                |        |      |      |
| ATOM | 10420 | OE1 | GLU | 122 | 1.142-124.537  | 7.492  | 1.00 | 0.00 |
| O    |       |     |     |     |                |        |      |      |
| ATOM | 10421 | OE2 | GLU | 122 | 2.120-124.393  | 5.542  | 1.00 | 0.00 |
| O1-  |       |     |     |     |                |        |      |      |
| ATOM | 10422 | C   | GLU | 122 | 5.402-122.533  | 9.186  | 1.00 | 0.00 |
| C    |       |     |     |     |                |        |      |      |
| ATOM | 10423 | O   | GLU | 122 | 5.765-123.643  | 9.614  | 1.00 | 0.00 |
| O    |       |     |     |     |                |        |      |      |
| ATOM | 10424 | N   | VAL | 123 | 4.986-121.546  | 10.027 | 1.00 | 0.00 |
| N    |       |     |     |     |                |        |      |      |
| ATOM | 10425 | CA  | VAL | 123 | 5.019-121.592  | 11.451 | 1.00 | 0.00 |
| C    |       |     |     |     |                |        |      |      |
| ATOM | 10426 | CB  | VAL | 123 | 6.139-120.738  | 12.075 | 1.00 | 0.00 |
| C    |       |     |     |     |                |        |      |      |
| ATOM | 10427 | CG1 | VAL | 123 | 5.833-119.242  | 12.103 | 1.00 | 0.00 |
| C    |       |     |     |     |                |        |      |      |
| ATOM | 10428 | CG2 | VAL | 123 | 6.496-121.204  | 13.515 | 1.00 | 0.00 |
| C    |       |     |     |     |                |        |      |      |
| ATOM | 10429 | C   | VAL | 123 | 3.605-121.269  | 12.045 | 1.00 | 0.00 |
| C    |       |     |     |     |                |        |      |      |
| ATOM | 10430 | O   | VAL | 123 | 2.926-120.373  | 11.531 | 1.00 | 0.00 |
| O    |       |     |     |     |                |        |      |      |
| ATOM | 10431 | N   | GLU | 124 | 3.278-122.054  | 13.001 | 1.00 | 0.00 |
| N    |       |     |     |     |                |        |      |      |
| ATOM | 10432 | CA  | GLU | 124 | 2.176-121.833  | 13.899 | 1.00 | 0.00 |
| C    |       |     |     |     |                |        |      |      |
| ATOM | 10433 | CB  | GLU | 124 | 1.487-123.164  | 14.282 | 1.00 | 0.00 |
| C    |       |     |     |     |                |        |      |      |
| ATOM | 10434 | CG  | GLU | 124 | 0.288-123.012  | 15.229 | 1.00 | 0.00 |
| C    |       |     |     |     |                |        |      |      |
| ATOM | 10435 | CD  | GLU | 124 | -0.026-124.324 | 15.910 | 1.00 | 0.00 |
| C    |       |     |     |     |                |        |      |      |
| ATOM | 10436 | OE1 | GLU | 124 | -0.523-124.310 | 17.076 | 1.00 | 0.00 |
| O    |       |     |     |     |                |        |      |      |
| ATOM | 10437 | OE2 | GLU | 124 | 0.202-125.448  | 15.347 | 1.00 | 0.00 |
| O1-  |       |     |     |     |                |        |      |      |
| ATOM | 10438 | C   | GLU | 124 | 2.799-121.064  | 15.105 | 1.00 | 0.00 |
| C    |       |     |     |     |                |        |      |      |
| ATOM | 10439 | O   | GLU | 124 | 3.751-121.508  | 15.790 | 1.00 | 0.00 |
| O    |       |     |     |     |                |        |      |      |

|      |       |     |     |     |                |        |      |      |
|------|-------|-----|-----|-----|----------------|--------|------|------|
| ATOM | 10440 | N   | ILE | 125 | 2.207-119.916  | 15.372 | 1.00 | 0.00 |
| N    |       |     |     |     |                |        |      |      |
| ATOM | 10441 | CA  | ILE | 125 | 2.396-119.120  | 16.544 | 1.00 | 0.00 |
| C    |       |     |     |     |                |        |      |      |
| ATOM | 10442 | CB  | ILE | 125 | 2.061-117.633  | 16.232 | 1.00 | 0.00 |
| C    |       |     |     |     |                |        |      |      |
| ATOM | 10443 | CG2 | ILE | 125 | 2.412-116.769  | 17.448 | 1.00 | 0.00 |
| C    |       |     |     |     |                |        |      |      |
| ATOM | 10444 | CG1 | ILE | 125 | 2.916-117.070  | 15.108 | 1.00 | 0.00 |
| C    |       |     |     |     |                |        |      |      |
| ATOM | 10445 | CD1 | ILE | 125 | 2.223-115.975  | 14.259 | 1.00 | 0.00 |
| C    |       |     |     |     |                |        |      |      |
| ATOM | 10446 | C   | ILE | 125 | 1.678-119.734  | 17.663 | 1.00 | 0.00 |
| C    |       |     |     |     |                |        |      |      |
| ATOM | 10447 | O   | ILE | 125 | 0.620-119.190  | 18.136 | 1.00 | 0.00 |
| O    |       |     |     |     |                |        |      |      |
| ATOM | 10448 | N   | THR | 126 | 2.106-120.915  | 18.148 | 1.00 | 0.00 |
| N    |       |     |     |     |                |        |      |      |
| ATOM | 10449 | CA  | THR | 126 | 1.267-121.877  | 18.863 | 1.00 | 0.00 |
| C    |       |     |     |     |                |        |      |      |
| ATOM | 10450 | CB  | THR | 126 | 2.016-123.257  | 18.794 | 1.00 | 0.00 |
| C    |       |     |     |     |                |        |      |      |
| ATOM | 10451 | CG2 | THR | 126 | 3.389-123.366  | 19.380 | 1.00 | 0.00 |
| C    |       |     |     |     |                |        |      |      |
| ATOM | 10452 | OG1 | THR | 126 | 1.301-124.291  | 19.273 | 1.00 | 0.00 |
| O    |       |     |     |     |                |        |      |      |
| ATOM | 10453 | C   | THR | 126 | 0.786-121.509  | 20.192 | 1.00 | 0.00 |
| C    |       |     |     |     |                |        |      |      |
| ATOM | 10454 | O   | THR | 126 | -0.211-122.143 | 20.683 | 1.00 | 0.00 |
| O    |       |     |     |     |                |        |      |      |
| ATOM | 10455 | N   | ALA | 127 | 1.346-120.510  | 20.917 | 1.00 | 0.00 |
| N    |       |     |     |     |                |        |      |      |
| ATOM | 10456 | CA  | ALA | 127 | 0.981-119.972  | 22.227 | 1.00 | 0.00 |
| C    |       |     |     |     |                |        |      |      |
| ATOM | 10457 | CB  | ALA | 127 | 1.492-120.873  | 23.369 | 1.00 | 0.00 |
| C    |       |     |     |     |                |        |      |      |
| ATOM | 10458 | C   | ALA | 127 | 1.468-118.517  | 22.354 | 1.00 | 0.00 |
| C    |       |     |     |     |                |        |      |      |
| ATOM | 10459 | O   | ALA | 127 | 2.487-118.126  | 21.779 | 1.00 | 0.00 |
| O    |       |     |     |     |                |        |      |      |
| ATOM | 10460 | N   | LEU | 128 | 0.632-117.641  | 22.935 | 1.00 | 0.00 |
| N    |       |     |     |     |                |        |      |      |
| ATOM | 10461 | CA  | LEU | 128 | 1.195-116.364  | 23.430 | 1.00 | 0.00 |
| C    |       |     |     |     |                |        |      |      |
| ATOM | 10462 | CB  | LEU | 128 | 0.394-115.133  | 22.931 | 1.00 | 0.00 |
| C    |       |     |     |     |                |        |      |      |
| ATOM | 10463 | CG  | LEU | 128 | 0.141-114.994  | 21.482 | 1.00 | 0.00 |
| C    |       |     |     |     |                |        |      |      |
| ATOM | 10464 | CD1 | LEU | 128 | -0.819-113.878 | 21.094 | 1.00 | 0.00 |
| C    |       |     |     |     |                |        |      |      |
| ATOM | 10465 | CD2 | LEU | 128 | 1.402-115.098  | 20.563 | 1.00 | 0.00 |
| C    |       |     |     |     |                |        |      |      |
| ATOM | 10466 | C   | LEU | 128 | 1.080-116.478  | 24.992 | 1.00 | 0.00 |
| C    |       |     |     |     |                |        |      |      |

|      |       |     |     |     |                |        |      |      |
|------|-------|-----|-----|-----|----------------|--------|------|------|
| ATOM | 10467 | O   | LEU | 128 | -0.032-116.551 | 25.537 | 1.00 | 0.00 |
| O    |       |     |     |     |                |        |      |      |
| ATOM | 10468 | N   | ILE | 129 | 2.146-116.385  | 25.791 | 1.00 | 0.00 |
| N    |       |     |     |     |                |        |      |      |
| ATOM | 10469 | CA  | ILE | 129 | 2.026-116.616  | 27.303 | 1.00 | 0.00 |
| C    |       |     |     |     |                |        |      |      |
| ATOM | 10470 | CB  | ILE | 129 | 3.325-117.386  | 27.897 | 1.00 | 0.00 |
| C    |       |     |     |     |                |        |      |      |
| ATOM | 10471 | CG2 | ILE | 129 | 3.274-117.526  | 29.475 | 1.00 | 0.00 |
| C    |       |     |     |     |                |        |      |      |
| ATOM | 10472 | CG1 | ILE | 129 | 3.747-118.629  | 27.146 | 1.00 | 0.00 |
| C    |       |     |     |     |                |        |      |      |
| ATOM | 10473 | CD1 | ILE | 129 | 2.600-119.693  | 27.326 | 1.00 | 0.00 |
| C    |       |     |     |     |                |        |      |      |
| ATOM | 10474 | C   | ILE | 129 | 1.652-115.324  | 28.027 | 1.00 | 0.00 |
| C    |       |     |     |     |                |        |      |      |
| ATOM | 10475 | O   | ILE | 129 | 0.964-115.473  | 29.075 | 1.00 | 0.00 |
| O    |       |     |     |     |                |        |      |      |
| ATOM | 10476 | N   | CYS | 130 | 2.152-114.162  | 27.599 | 1.00 | 0.00 |
| N    |       |     |     |     |                |        |      |      |
| ATOM | 10477 | CA  | CYS | 130 | 1.979-112.918  | 28.296 | 1.00 | 0.00 |
| C    |       |     |     |     |                |        |      |      |
| ATOM | 10478 | CB  | CYS | 130 | 2.688-112.905  | 29.655 | 1.00 | 0.00 |
| C    |       |     |     |     |                |        |      |      |
| ATOM | 10479 | SG  | CYS | 130 | 4.494-113.100  | 29.539 | 1.00 | 0.00 |
| S    |       |     |     |     |                |        |      |      |
| ATOM | 10480 | C   | CYS | 130 | 2.412-111.650  | 27.470 | 1.00 | 0.00 |
| C    |       |     |     |     |                |        |      |      |
| ATOM | 10481 | O   | CYS | 130 | 3.463-111.540  | 26.856 | 1.00 | 0.00 |
| O    |       |     |     |     |                |        |      |      |
| ATOM | 10482 | N   | LEU | 131 | 1.540-110.600  | 27.537 | 1.00 | 0.00 |
| N    |       |     |     |     |                |        |      |      |
| ATOM | 10483 | CA  | LEU | 131 | 1.877-109.162  | 27.127 | 1.00 | 0.00 |
| C    |       |     |     |     |                |        |      |      |
| ATOM | 10484 | CB  | LEU | 131 | 0.623-108.301  | 26.943 | 1.00 | 0.00 |
| C    |       |     |     |     |                |        |      |      |
| ATOM | 10485 | CG  | LEU | 131 | 0.188-108.227  | 25.462 | 1.00 | 0.00 |
| C    |       |     |     |     |                |        |      |      |
| ATOM | 10486 | CD1 | LEU | 131 | -1.232-107.680 | 25.329 | 1.00 | 0.00 |
| C    |       |     |     |     |                |        |      |      |
| ATOM | 10487 | CD2 | LEU | 131 | 1.139-107.347  | 24.651 | 1.00 | 0.00 |
| C    |       |     |     |     |                |        |      |      |
| ATOM | 10488 | C   | LEU | 131 | 2.798-108.679  | 28.197 | 1.00 | 0.00 |
| C    |       |     |     |     |                |        |      |      |
| ATOM | 10489 | O   | LEU | 131 | 2.693-109.061  | 29.340 | 1.00 | 0.00 |
| O    |       |     |     |     |                |        |      |      |
| ATOM | 10490 | N   | VAL | 132 | 3.713-107.809  | 27.789 | 1.00 | 0.00 |
| N    |       |     |     |     |                |        |      |      |
| ATOM | 10491 | CA  | VAL | 132 | 4.679-106.979  | 28.591 | 1.00 | 0.00 |
| C    |       |     |     |     |                |        |      |      |
| ATOM | 10492 | CB  | VAL | 132 | 6.130-107.453  | 28.294 | 1.00 | 0.00 |
| C    |       |     |     |     |                |        |      |      |
| ATOM | 10493 | CG1 | VAL | 132 | 7.128-106.927  | 29.328 | 1.00 | 0.00 |
| C    |       |     |     |     |                |        |      |      |



|      |       |     |     |     |               |        |      |      |
|------|-------|-----|-----|-----|---------------|--------|------|------|
| ATOM | 10494 | CG2 | VAL | 132 | 6.225-108.986 | 28.234 | 1.00 | 0.00 |
| C    |       |     |     |     |               |        |      |      |
| ATOM | 10495 | C   | VAL | 132 | 4.473-105.495 | 28.422 | 1.00 | 0.00 |
| C    |       |     |     |     |               |        |      |      |
| ATOM | 10496 | O   | VAL | 132 | 4.104-105.045 | 27.326 | 1.00 | 0.00 |
| O    |       |     |     |     |               |        |      |      |
| ATOM | 10497 | N   | ASP | 133 | 4.857-104.718 | 29.504 | 1.00 | 0.00 |
| N    |       |     |     |     |               |        |      |      |
| ATOM | 10498 | CA  | ASP | 133 | 4.526-103.288 | 29.621 | 1.00 | 0.00 |
| C    |       |     |     |     |               |        |      |      |
| ATOM | 10499 | CB  | ASP | 133 | 4.276-102.834 | 31.047 | 1.00 | 0.00 |
| C    |       |     |     |     |               |        |      |      |
| ATOM | 10500 | CG  | ASP | 133 | 3.741-101.400 | 31.167 | 1.00 | 0.00 |
| C    |       |     |     |     |               |        |      |      |
| ATOM | 10501 | OD1 | ASP | 133 | 3.640-100.977 | 32.352 | 1.00 | 0.00 |
| O    |       |     |     |     |               |        |      |      |
| ATOM | 10502 | OD2 | ASP | 133 | 3.489-100.791 | 30.091 | 1.00 | 0.00 |
| O1-  |       |     |     |     |               |        |      |      |
| ATOM | 10503 | C   | ASP | 133 | 5.611-102.486 | 28.928 | 1.00 | 0.00 |
| C    |       |     |     |     |               |        |      |      |
| ATOM | 10504 | O   | ASP | 133 | 6.784-102.515 | 29.489 | 1.00 | 0.00 |
| O    |       |     |     |     |               |        |      |      |
| ATOM | 10505 | N   | LYS | 134 | 5.449-101.821 | 27.781 | 1.00 | 0.00 |
| N    |       |     |     |     |               |        |      |      |
| ATOM | 10506 | CA  | LYS | 134 | 6.511-100.912 | 27.279 | 1.00 | 0.00 |
| C    |       |     |     |     |               |        |      |      |
| ATOM | 10507 | CB  | LYS | 134 | 6.066-100.280 | 25.957 | 1.00 | 0.00 |
| C    |       |     |     |     |               |        |      |      |
| ATOM | 10508 | CG  | LYS | 134 | 5.848-101.355 | 24.886 | 1.00 | 0.00 |
| C    |       |     |     |     |               |        |      |      |
| ATOM | 10509 | CD  | LYS | 134 | 5.568-100.820 | 23.489 | 1.00 | 0.00 |
| C    |       |     |     |     |               |        |      |      |
| ATOM | 10510 | CE  | LYS | 134 | 4.408 -99.843 | 23.456 | 1.00 | 0.00 |
| C    |       |     |     |     |               |        |      |      |
| ATOM | 10511 | NZ  | LYS | 134 | 4.179 -99.432 | 22.062 | 1.00 | 0.00 |
| N1+  |       |     |     |     |               |        |      |      |
| ATOM | 10512 | C   | LYS | 134 | 6.973 -99.803 | 28.275 | 1.00 | 0.00 |
| C    |       |     |     |     |               |        |      |      |
| ATOM | 10513 | O   | LYS | 134 | 8.136 -99.485 | 28.283 | 1.00 | 0.00 |
| O    |       |     |     |     |               |        |      |      |
| ATOM | 10514 | N   | LYS | 135 | 6.010 -99.454 | 29.142 | 1.00 | 0.00 |
| N    |       |     |     |     |               |        |      |      |
| ATOM | 10515 | CA  | LYS | 135 | 6.348 -98.467 | 30.221 | 1.00 | 0.00 |
| C    |       |     |     |     |               |        |      |      |
| ATOM | 10516 | CB  | LYS | 135 | 5.120 -97.575 | 30.474 | 1.00 | 0.00 |
| C    |       |     |     |     |               |        |      |      |
| ATOM | 10517 | CG  | LYS | 135 | 4.727 -96.795 | 29.209 | 1.00 | 0.00 |
| C    |       |     |     |     |               |        |      |      |
| ATOM | 10518 | CD  | LYS | 135 | 3.562 -95.840 | 29.459 | 1.00 | 0.00 |
| C    |       |     |     |     |               |        |      |      |
| ATOM | 10519 | CE  | LYS | 135 | 3.454 -94.801 | 28.353 | 1.00 | 0.00 |
| C    |       |     |     |     |               |        |      |      |
| ATOM | 10520 | NZ  | LYS | 135 | 2.343 -93.871 | 28.660 | 1.00 | 0.00 |
| N1+  |       |     |     |     |               |        |      |      |

|      |       |     |     |     |       |          |        |      |      |
|------|-------|-----|-----|-----|-------|----------|--------|------|------|
| ATOM | 10521 | C   | LYS | 135 | 6.919 | -98.976  | 31.524 | 1.00 | 0.00 |
| C    |       |     |     |     |       |          |        |      |      |
| ATOM | 10522 | O   | LYS | 135 | 7.431 | -98.173  | 32.395 | 1.00 | 0.00 |
| O    |       |     |     |     |       |          |        |      |      |
| ATOM | 10523 | N   | SER | 136 | 6.983 | -100.295 | 31.848 | 1.00 | 0.00 |
| N    |       |     |     |     |       |          |        |      |      |
| ATOM | 10524 | CA  | SER | 136 | 7.550 | -100.830 | 33.083 | 1.00 | 0.00 |
| C    |       |     |     |     |       |          |        |      |      |
| ATOM | 10525 | CB  | SER | 136 | 6.552 | -100.862 | 34.236 | 1.00 | 0.00 |
| C    |       |     |     |     |       |          |        |      |      |
| ATOM | 10526 | OG  | SER | 136 | 5.635 | -101.932 | 34.088 | 1.00 | 0.00 |
| O    |       |     |     |     |       |          |        |      |      |
| ATOM | 10527 | C   | SER | 136 | 8.327 | -102.117 | 32.994 | 1.00 | 0.00 |
| C    |       |     |     |     |       |          |        |      |      |
| ATOM | 10528 | O   | SER | 136 | 9.120 | -102.464 | 33.893 | 1.00 | 0.00 |
| O    |       |     |     |     |       |          |        |      |      |
| ATOM | 10529 | N   | GLY | 137 | 8.107 | -102.931 | 31.923 | 1.00 | 0.00 |
| N    |       |     |     |     |       |          |        |      |      |
| ATOM | 10530 | CA  | GLY | 137 | 8.543 | -104.255 | 31.859 | 1.00 | 0.00 |
| C    |       |     |     |     |       |          |        |      |      |
| ATOM | 10531 | C   | GLY | 137 | 7.718 | -105.279 | 32.654 | 1.00 | 0.00 |
| C    |       |     |     |     |       |          |        |      |      |
| ATOM | 10532 | O   | GLY | 137 | 8.104 | -106.433 | 32.714 | 1.00 | 0.00 |
| O    |       |     |     |     |       |          |        |      |      |
| ATOM | 10533 | N   | GLU | 138 | 6.570 | -104.924 | 33.217 | 1.00 | 0.00 |
| N    |       |     |     |     |       |          |        |      |      |
| ATOM | 10534 | CA  | GLU | 138 | 5.593 | -105.793 | 33.893 | 1.00 | 0.00 |
| C    |       |     |     |     |       |          |        |      |      |
| ATOM | 10535 | CB  | GLU | 138 | 4.500 | -104.942 | 34.569 | 1.00 | 0.00 |
| C    |       |     |     |     |       |          |        |      |      |
| ATOM | 10536 | CG  | GLU | 138 | 3.537 | -105.741 | 35.448 | 1.00 | 0.00 |
| C    |       |     |     |     |       |          |        |      |      |
| ATOM | 10537 | CD  | GLU | 138 | 2.108 | -105.247 | 35.216 | 1.00 | 0.00 |
| C    |       |     |     |     |       |          |        |      |      |
| ATOM | 10538 | OE1 | GLU | 138 | 1.364 | -106.043 | 34.577 | 1.00 | 0.00 |
| O    |       |     |     |     |       |          |        |      |      |
| ATOM | 10539 | OE2 | GLU | 138 | 1.846 | -104.110 | 35.701 | 1.00 | 0.00 |
| O1-  |       |     |     |     |       |          |        |      |      |
| ATOM | 10540 | C   | GLU | 138 | 4.935 | -106.771 | 32.920 | 1.00 | 0.00 |
| C    |       |     |     |     |       |          |        |      |      |
| ATOM | 10541 | O   | GLU | 138 | 4.229 | -106.325 | 31.957 | 1.00 | 0.00 |
| O    |       |     |     |     |       |          |        |      |      |
| ATOM | 10542 | N   | LYS | 139 | 5.013 | -108.066 | 33.177 | 1.00 | 0.00 |
| N    |       |     |     |     |       |          |        |      |      |
| ATOM | 10543 | CA  | LYS | 139 | 4.358 | -109.119 | 32.374 | 1.00 | 0.00 |
| C    |       |     |     |     |       |          |        |      |      |
| ATOM | 10544 | CB  | LYS | 139 | 5.181 | -110.417 | 32.455 | 1.00 | 0.00 |
| C    |       |     |     |     |       |          |        |      |      |
| ATOM | 10545 | CG  | LYS | 139 | 6.616 | -110.235 | 31.937 | 1.00 | 0.00 |
| C    |       |     |     |     |       |          |        |      |      |
| ATOM | 10546 | CD  | LYS | 139 | 7.383 | -111.555 | 31.843 | 1.00 | 0.00 |
| C    |       |     |     |     |       |          |        |      |      |
| ATOM | 10547 | CE  | LYS | 139 | 8.704 | -111.360 | 31.107 | 1.00 | 0.00 |
| C    |       |     |     |     |       |          |        |      |      |

|      |       |     |     |     |                |        |      |      |
|------|-------|-----|-----|-----|----------------|--------|------|------|
| ATOM | 10548 | NZ  | LYS | 139 | 9.410-112.658  | 31.004 | 1.00 | 0.00 |
| N1+  |       |     |     |     |                |        |      |      |
| ATOM | 10549 | C   | LYS | 139 | 2.916-109.392  | 32.825 | 1.00 | 0.00 |
| C    |       |     |     |     |                |        |      |      |
| ATOM | 10550 | O   | LYS | 139 | 2.764-109.358  | 34.058 | 1.00 | 0.00 |
| O    |       |     |     |     |                |        |      |      |
| ATOM | 10551 | N   | SER | 140 | 1.970-109.544  | 31.976 | 1.00 | 0.00 |
| N    |       |     |     |     |                |        |      |      |
| ATOM | 10552 | CA  | SER | 140 | 0.516-109.787  | 32.281 | 1.00 | 0.00 |
| C    |       |     |     |     |                |        |      |      |
| ATOM | 10553 | CB  | SER | 140 | -0.309-109.906 | 30.994 | 1.00 | 0.00 |
| C    |       |     |     |     |                |        |      |      |
| ATOM | 10554 | OG  | SER | 140 | -0.008-110.909 | 30.040 | 1.00 | 0.00 |
| O    |       |     |     |     |                |        |      |      |
| ATOM | 10555 | C   | SER | 140 | 0.312-111.053  | 33.157 | 1.00 | 0.00 |
| C    |       |     |     |     |                |        |      |      |
| ATOM | 10556 | O   | SER | 140 | 0.937-112.078  | 33.033 | 1.00 | 0.00 |
| O    |       |     |     |     |                |        |      |      |
| ATOM | 10557 | N   | LYS | 141 | -0.726-111.084 | 33.975 | 1.00 | 0.00 |
| N    |       |     |     |     |                |        |      |      |
| ATOM | 10558 | CA  | LYS | 141 | -1.324-112.255 | 34.639 | 1.00 | 0.00 |
| C    |       |     |     |     |                |        |      |      |
| ATOM | 10559 | CB  | LYS | 141 | -2.436-111.828 | 35.685 | 1.00 | 0.00 |
| C    |       |     |     |     |                |        |      |      |
| ATOM | 10560 | CG  | LYS | 141 | -2.657-112.694 | 37.002 | 1.00 | 0.00 |
| C    |       |     |     |     |                |        |      |      |
| ATOM | 10561 | CD  | LYS | 141 | -3.988-112.395 | 37.737 | 1.00 | 0.00 |
| C    |       |     |     |     |                |        |      |      |
| ATOM | 10562 | CE  | LYS | 141 | -4.294-113.257 | 38.952 | 1.00 | 0.00 |
| C    |       |     |     |     |                |        |      |      |
| ATOM | 10563 | NZ  | LYS | 141 | -5.610-112.974 | 39.531 | 1.00 | 0.00 |
| N1+  |       |     |     |     |                |        |      |      |
| ATOM | 10564 | C   | LYS | 141 | -1.837-113.396 | 33.726 | 1.00 | 0.00 |
| C    |       |     |     |     |                |        |      |      |
| ATOM | 10565 | O   | LYS | 141 | -1.793-114.558 | 34.217 | 1.00 | 0.00 |
| O    |       |     |     |     |                |        |      |      |
| ATOM | 10566 | N   | THR | 142 | -2.282-113.033 | 32.500 | 1.00 | 0.00 |
| N    |       |     |     |     |                |        |      |      |
| ATOM | 10567 | CA  | THR | 142 | -3.089-113.912 | 31.618 | 1.00 | 0.00 |
| C    |       |     |     |     |                |        |      |      |
| ATOM | 10568 | CB  | THR | 142 | -4.593-113.796 | 31.848 | 1.00 | 0.00 |
| C    |       |     |     |     |                |        |      |      |
| ATOM | 10569 | CG2 | THR | 142 | -5.134-112.500 | 31.307 | 1.00 | 0.00 |
| C    |       |     |     |     |                |        |      |      |
| ATOM | 10570 | OG1 | THR | 142 | -5.221-114.931 | 31.360 | 1.00 | 0.00 |
| O    |       |     |     |     |                |        |      |      |
| ATOM | 10571 | C   | THR | 142 | -2.721-113.826 | 30.145 | 1.00 | 0.00 |
| C    |       |     |     |     |                |        |      |      |
| ATOM | 10572 | O   | THR | 142 | -2.077-112.820 | 29.813 | 1.00 | 0.00 |
| O    |       |     |     |     |                |        |      |      |
| ATOM | 10573 | N   | ARG | 143 | -3.003-114.873 | 29.334 | 1.00 | 0.00 |
| N    |       |     |     |     |                |        |      |      |
| ATOM | 10574 | CA  | ARG | 143 | -2.708-114.961 | 27.910 | 1.00 | 0.00 |
| C    |       |     |     |     |                |        |      |      |

|      |       |     |     |     |         |          |        |      |      |
|------|-------|-----|-----|-----|---------|----------|--------|------|------|
| ATOM | 10575 | CB  | ARG | 143 | -2.935  | -116.431 | 27.369 | 1.00 | 0.00 |
| C    |       |     |     |     |         |          |        |      |      |
| ATOM | 10576 | CG  | ARG | 143 | -1.977  | -117.420 | 28.086 | 1.00 | 0.00 |
| C    |       |     |     |     |         |          |        |      |      |
| ATOM | 10577 | CD  | ARG | 143 | -2.266  | -118.963 | 27.978 | 1.00 | 0.00 |
| C    |       |     |     |     |         |          |        |      |      |
| ATOM | 10578 | NE  | ARG | 143 | -3.696  | -119.192 | 28.364 | 1.00 | 0.00 |
| N    |       |     |     |     |         |          |        |      |      |
| ATOM | 10579 | CZ  | ARG | 143 | -4.308  | -120.329 | 28.443 | 1.00 | 0.00 |
| C    |       |     |     |     |         |          |        |      |      |
| ATOM | 10580 | NH1 | ARG | 143 | -3.787  | -121.512 | 28.270 | 1.00 | 0.00 |
| N    |       |     |     |     |         |          |        |      |      |
| ATOM | 10581 | NH2 | ARG | 143 | -5.596  | -120.341 | 28.774 | 1.00 | 0.00 |
| N1+  |       |     |     |     |         |          |        |      |      |
| ATOM | 10582 | C   | ARG | 143 | -3.589  | -113.971 | 27.098 | 1.00 | 0.00 |
| C    |       |     |     |     |         |          |        |      |      |
| ATOM | 10583 | O   | ARG | 143 | -4.783  | -113.849 | 27.482 | 1.00 | 0.00 |
| O    |       |     |     |     |         |          |        |      |      |
| ATOM | 10584 | N   | PRO | 144 | -3.089  | -113.195 | 26.162 | 1.00 | 0.00 |
| N    |       |     |     |     |         |          |        |      |      |
| ATOM | 10585 | CD  | PRO | 144 | -1.702  | -112.868 | 25.976 | 1.00 | 0.00 |
| C    |       |     |     |     |         |          |        |      |      |
| ATOM | 10586 | CG  | PRO | 144 | -1.651  | -111.431 | 25.345 | 1.00 | 0.00 |
| C    |       |     |     |     |         |          |        |      |      |
| ATOM | 10587 | CB  | PRO | 144 | -2.938  | -111.403 | 24.559 | 1.00 | 0.00 |
| C    |       |     |     |     |         |          |        |      |      |
| ATOM | 10588 | CA  | PRO | 144 | -3.936  | -112.308 | 25.344 | 1.00 | 0.00 |
| C    |       |     |     |     |         |          |        |      |      |
| ATOM | 10589 | C   | PRO | 144 | -4.841  | -113.098 | 24.419 | 1.00 | 0.00 |
| C    |       |     |     |     |         |          |        |      |      |
| ATOM | 10590 | O   | PRO | 144 | -4.614  | -114.306 | 24.121 | 1.00 | 0.00 |
| O    |       |     |     |     |         |          |        |      |      |
| ATOM | 10591 | N   | ARG | 145 | -5.860  | -112.337 | 23.958 | 1.00 | 0.00 |
| N    |       |     |     |     |         |          |        |      |      |
| ATOM | 10592 | CA  | ARG | 145 | -6.750  | -112.757 | 22.850 | 1.00 | 0.00 |
| C    |       |     |     |     |         |          |        |      |      |
| ATOM | 10593 | CB  | ARG | 145 | -8.210  | -112.354 | 23.020 | 1.00 | 0.00 |
| C    |       |     |     |     |         |          |        |      |      |
| ATOM | 10594 | CG  | ARG | 145 | -8.866  | -112.979 | 24.238 | 1.00 | 0.00 |
| C    |       |     |     |     |         |          |        |      |      |
| ATOM | 10595 | CD  | ARG | 145 | -10.342 | -112.744 | 24.176 | 1.00 | 0.00 |
| C    |       |     |     |     |         |          |        |      |      |
| ATOM | 10596 | NE  | ARG | 145 | -10.652 | -111.305 | 24.356 | 1.00 | 0.00 |
| N    |       |     |     |     |         |          |        |      |      |
| ATOM | 10597 | CZ  | ARG | 145 | -11.214 | -110.526 | 23.461 | 1.00 | 0.00 |
| C    |       |     |     |     |         |          |        |      |      |
| ATOM | 10598 | NH1 | ARG | 145 | -11.448 | -110.908 | 22.192 | 1.00 | 0.00 |
| N    |       |     |     |     |         |          |        |      |      |
| ATOM | 10599 | NH2 | ARG | 145 | -11.487 | -109.300 | 23.784 | 1.00 | 0.00 |
| N1+  |       |     |     |     |         |          |        |      |      |
| ATOM | 10600 | C   | ARG | 145 | -6.170  | -112.245 | 21.544 | 1.00 | 0.00 |
| C    |       |     |     |     |         |          |        |      |      |
| ATOM | 10601 | O   | ARG | 145 | -6.241  | -112.971 | 20.565 | 1.00 | 0.00 |
| O    |       |     |     |     |         |          |        |      |      |

|      |       |     |     |     |        |          |        |      |      |
|------|-------|-----|-----|-----|--------|----------|--------|------|------|
| ATOM | 10602 | N   | PHE | 146 | -5.604 | -111.010 | 21.553 | 1.00 | 0.00 |
| N    |       |     |     |     |        |          |        |      |      |
| ATOM | 10603 | CA  | PHE | 146 | -5.005 | -110.437 | 20.404 | 1.00 | 0.00 |
| C    |       |     |     |     |        |          |        |      |      |
| ATOM | 10604 | CB  | PHE | 146 | -6.059 | -109.516 | 19.704 | 1.00 | 0.00 |
| C    |       |     |     |     |        |          |        |      |      |
| ATOM | 10605 | CG  | PHE | 146 | -7.320 | -110.191 | 19.035 | 1.00 | 0.00 |
| C    |       |     |     |     |        |          |        |      |      |
| ATOM | 10606 | CD1 | PHE | 146 | -8.619 | -109.884 | 19.440 | 1.00 | 0.00 |
| C    |       |     |     |     |        |          |        |      |      |
| ATOM | 10607 | CE1 | PHE | 146 | -9.704 | -110.464 | 18.689 | 1.00 | 0.00 |
| C    |       |     |     |     |        |          |        |      |      |
| ATOM | 10608 | CZ  | PHE | 146 | -9.441 | -111.351 | 17.636 | 1.00 | 0.00 |
| C    |       |     |     |     |        |          |        |      |      |
| ATOM | 10609 | CE2 | PHE | 146 | -8.142 | -111.651 | 17.198 | 1.00 | 0.00 |
| C    |       |     |     |     |        |          |        |      |      |
| ATOM | 10610 | CD2 | PHE | 146 | -7.072 | -111.054 | 17.904 | 1.00 | 0.00 |
| C    |       |     |     |     |        |          |        |      |      |
| ATOM | 10611 | C   | PHE | 146 | -3.818 | -109.607 | 20.822 | 1.00 | 0.00 |
| C    |       |     |     |     |        |          |        |      |      |
| ATOM | 10612 | O   | PHE | 146 | -3.658 | -109.260 | 21.979 | 1.00 | 0.00 |
| O    |       |     |     |     |        |          |        |      |      |
| ATOM | 10613 | N   | VAL | 147 | -2.934 | -109.461 | 19.821 | 1.00 | 0.00 |
| N    |       |     |     |     |        |          |        |      |      |
| ATOM | 10614 | CA  | VAL | 147 | -1.642 | -108.678 | 19.925 | 1.00 | 0.00 |
| C    |       |     |     |     |        |          |        |      |      |
| ATOM | 10615 | CB  | VAL | 147 | -0.443 | -109.533 | 20.399 | 1.00 | 0.00 |
| C    |       |     |     |     |        |          |        |      |      |
| ATOM | 10616 | CG1 | VAL | 147 | -0.510 | -109.966 | 21.901 | 1.00 | 0.00 |
| C    |       |     |     |     |        |          |        |      |      |
| ATOM | 10617 | CG2 | VAL | 147 | -0.008 | -110.628 | 19.453 | 1.00 | 0.00 |
| C    |       |     |     |     |        |          |        |      |      |
| ATOM | 10618 | C   | VAL | 147 | -1.388 | -107.936 | 18.633 | 1.00 | 0.00 |
| C    |       |     |     |     |        |          |        |      |      |
| ATOM | 10619 | O   | VAL | 147 | -1.388 | -108.560 | 17.575 | 1.00 | 0.00 |
| O    |       |     |     |     |        |          |        |      |      |
| ATOM | 10620 | N   | LYS | 148 | -1.171 | -106.618 | 18.757 | 1.00 | 0.00 |
| N    |       |     |     |     |        |          |        |      |      |
| ATOM | 10621 | CA  | LYS | 148 | -1.441 | -105.602 | 17.749 | 1.00 | 0.00 |
| C    |       |     |     |     |        |          |        |      |      |
| ATOM | 10622 | CB  | LYS | 148 | -2.894 | -105.083 | 18.125 | 1.00 | 0.00 |
| C    |       |     |     |     |        |          |        |      |      |
| ATOM | 10623 | CG  | LYS | 148 | -3.498 | -103.912 | 17.388 | 1.00 | 0.00 |
| C    |       |     |     |     |        |          |        |      |      |
| ATOM | 10624 | CD  | LYS | 148 | -3.635 | -104.070 | 15.929 | 1.00 | 0.00 |
| C    |       |     |     |     |        |          |        |      |      |
| ATOM | 10625 | CE  | LYS | 148 | -4.175 | -102.747 | 15.352 | 1.00 | 0.00 |
| C    |       |     |     |     |        |          |        |      |      |
| ATOM | 10626 | NZ  | LYS | 148 | -4.065 | -102.505 | 13.903 | 1.00 | 0.00 |
| N1+  |       |     |     |     |        |          |        |      |      |
| ATOM | 10627 | C   | LYS | 148 | -0.384 | -104.475 | 17.770 | 1.00 | 0.00 |
| C    |       |     |     |     |        |          |        |      |      |
| ATOM | 10628 | O   | LYS | 148 | 0.159  | -104.228 | 18.818 | 1.00 | 0.00 |
| O    |       |     |     |     |        |          |        |      |      |

|      |       |     |     |     |        |          |        |      |      |
|------|-------|-----|-----|-----|--------|----------|--------|------|------|
| ATOM | 10629 | N   | GLN | 149 | -0.138 | -103.823 | 16.615 | 1.00 | 0.00 |
| N    |       |     |     |     |        |          |        |      |      |
| ATOM | 10630 | CA  | GLN | 149 | 0.295  | -102.462 | 16.450 | 1.00 | 0.00 |
| C    |       |     |     |     |        |          |        |      |      |
| ATOM | 10631 | CB  | GLN | 149 | -0.539 | -101.436 | 17.173 | 1.00 | 0.00 |
| C    |       |     |     |     |        |          |        |      |      |
| ATOM | 10632 | CG  | GLN | 149 | -0.070 | -100.049 | 16.741 | 1.00 | 0.00 |
| C    |       |     |     |     |        |          |        |      |      |
| ATOM | 10633 | CD  | GLN | 149 | -1.169 | -99.026  | 16.716 | 1.00 | 0.00 |
| C    |       |     |     |     |        |          |        |      |      |
| ATOM | 10634 | OE1 | GLN | 149 | -2.096 | -99.152  | 17.476 | 1.00 | 0.00 |
| O    |       |     |     |     |        |          |        |      |      |
| ATOM | 10635 | NE2 | GLN | 149 | -1.067 | -98.065  | 15.848 | 1.00 | 0.00 |
| N    |       |     |     |     |        |          |        |      |      |
| ATOM | 10636 | C   | GLN | 149 | 1.826  | -102.295 | 16.542 | 1.00 | 0.00 |
| C    |       |     |     |     |        |          |        |      |      |
| ATOM | 10637 | O   | GLN | 149 | 2.535  | -102.112 | 15.584 | 1.00 | 0.00 |
| O    |       |     |     |     |        |          |        |      |      |
| ATOM | 10638 | N   | ASP | 150 | 2.318  | -102.473 | 17.772 | 1.00 | 0.00 |
| N    |       |     |     |     |        |          |        |      |      |
| ATOM | 10639 | CA  | ASP | 150 | 3.684  | -102.152 | 18.148 | 1.00 | 0.00 |
| C    |       |     |     |     |        |          |        |      |      |
| ATOM | 10640 | CB  | ASP | 150 | 3.863  | -100.635 | 18.185 | 1.00 | 0.00 |
| C    |       |     |     |     |        |          |        |      |      |
| ATOM | 10641 | CG  | ASP | 150 | 3.076  | -99.842  | 19.227 | 1.00 | 0.00 |
| C    |       |     |     |     |        |          |        |      |      |
| ATOM | 10642 | OD1 | ASP | 150 | 3.294  | -98.597  | 19.218 | 1.00 | 0.00 |
| O    |       |     |     |     |        |          |        |      |      |
| ATOM | 10643 | OD2 | ASP | 150 | 2.347  | -100.505 | 20.016 | 1.00 | 0.00 |
| O1-  |       |     |     |     |        |          |        |      |      |
| ATOM | 10644 | C   | ASP | 150 | 4.144  | -102.848 | 19.528 | 1.00 | 0.00 |
| C    |       |     |     |     |        |          |        |      |      |
| ATOM | 10645 | O   | ASP | 150 | 5.201  | -102.548 | 20.096 | 1.00 | 0.00 |
| O    |       |     |     |     |        |          |        |      |      |
| ATOM | 10646 | N   | GLN | 151 | 3.265  | -103.687 | 20.086 | 1.00 | 0.00 |
| N    |       |     |     |     |        |          |        |      |      |
| ATOM | 10647 | CA  | GLN | 151 | 3.485  | -104.397 | 21.391 | 1.00 | 0.00 |
| C    |       |     |     |     |        |          |        |      |      |
| ATOM | 10648 | CB  | GLN | 151 | 2.205  | -105.200 | 21.703 | 1.00 | 0.00 |
| C    |       |     |     |     |        |          |        |      |      |
| ATOM | 10649 | CG  | GLN | 151 | 1.051  | -104.293 | 22.146 | 1.00 | 0.00 |
| C    |       |     |     |     |        |          |        |      |      |
| ATOM | 10650 | CD  | GLN | 151 | -0.288 | -105.004 | 22.136 | 1.00 | 0.00 |
| C    |       |     |     |     |        |          |        |      |      |
| ATOM | 10651 | OE1 | GLN | 151 | -0.493 | -106.072 | 21.567 | 1.00 | 0.00 |
| O    |       |     |     |     |        |          |        |      |      |
| ATOM | 10652 | NE2 | GLN | 151 | -1.269 | -104.311 | 22.805 | 1.00 | 0.00 |
| N    |       |     |     |     |        |          |        |      |      |
| ATOM | 10653 | C   | GLN | 151 | 4.697  | -105.271 | 21.592 | 1.00 | 0.00 |
| C    |       |     |     |     |        |          |        |      |      |
| ATOM | 10654 | O   | GLN | 151 | 5.202  | -105.821 | 20.669 | 1.00 | 0.00 |
| O    |       |     |     |     |        |          |        |      |      |
| ATOM | 10655 | N   | VAL | 152 | 5.022  | -105.557 | 22.843 | 1.00 | 0.00 |
| N    |       |     |     |     |        |          |        |      |      |

|      |       |     |     |     |               |        |      |      |
|------|-------|-----|-----|-----|---------------|--------|------|------|
| ATOM | 10656 | CA  | VAL | 152 | 6.063-106.556 | 23.224 | 1.00 | 0.00 |
| C    |       |     |     |     |               |        |      |      |
| ATOM | 10657 | CB  | VAL | 152 | 7.230-105.905 | 23.973 | 1.00 | 0.00 |
| C    |       |     |     |     |               |        |      |      |
| ATOM | 10658 | CG1 | VAL | 152 | 8.114-105.130 | 22.989 | 1.00 | 0.00 |
| C    |       |     |     |     |               |        |      |      |
| ATOM | 10659 | CG2 | VAL | 152 | 6.791-104.990 | 25.110 | 1.00 | 0.00 |
| C    |       |     |     |     |               |        |      |      |
| ATOM | 10660 | C   | VAL | 152 | 5.444-107.768 | 23.927 | 1.00 | 0.00 |
| C    |       |     |     |     |               |        |      |      |
| ATOM | 10661 | O   | VAL | 152 | 4.656-107.645 | 24.849 | 1.00 | 0.00 |
| O    |       |     |     |     |               |        |      |      |
| ATOM | 10662 | N   | CYS | 153 | 5.730-108.987 | 23.586 | 1.00 | 0.00 |
| N    |       |     |     |     |               |        |      |      |
| ATOM | 10663 | CA  | CYS | 153 | 5.089-110.173 | 24.068 | 1.00 | 0.00 |
| C    |       |     |     |     |               |        |      |      |
| ATOM | 10664 | CB  | CYS | 153 | 3.851-110.429 | 23.178 | 1.00 | 0.00 |
| C    |       |     |     |     |               |        |      |      |
| ATOM | 10665 | SG  | CYS | 153 | 2.721-111.738 | 23.733 | 1.00 | 0.00 |
| S    |       |     |     |     |               |        |      |      |
| ATOM | 10666 | C   | CYS | 153 | 6.045-111.405 | 24.010 | 1.00 | 0.00 |
| C    |       |     |     |     |               |        |      |      |
| ATOM | 10667 | O   | CYS | 153 | 6.799-111.545 | 23.036 | 1.00 | 0.00 |
| O    |       |     |     |     |               |        |      |      |
| ATOM | 10668 | N   | ILE | 154 | 5.845-112.415 | 24.880 | 1.00 | 0.00 |
| N    |       |     |     |     |               |        |      |      |
| ATOM | 10669 | CA  | ILE | 154 | 6.527-113.738 | 24.956 | 1.00 | 0.00 |
| C    |       |     |     |     |               |        |      |      |
| ATOM | 10670 | CB  | ILE | 154 | 6.702-114.184 | 26.422 | 1.00 | 0.00 |
| C    |       |     |     |     |               |        |      |      |
| ATOM | 10671 | CG2 | ILE | 154 | 7.378-115.557 | 26.513 | 1.00 | 0.00 |
| C    |       |     |     |     |               |        |      |      |
| ATOM | 10672 | CG1 | ILE | 154 | 7.465-113.145 | 27.271 | 1.00 | 0.00 |
| C    |       |     |     |     |               |        |      |      |
| ATOM | 10673 | CD1 | ILE | 154 | 8.813-112.737 | 26.702 | 1.00 | 0.00 |
| C    |       |     |     |     |               |        |      |      |
| ATOM | 10674 | C   | ILE | 154 | 5.673-114.729 | 24.161 | 1.00 | 0.00 |
| C    |       |     |     |     |               |        |      |      |
| ATOM | 10675 | O   | ILE | 154 | 4.531-114.971 | 24.534 | 1.00 | 0.00 |
| O    |       |     |     |     |               |        |      |      |
| ATOM | 10676 | N   | ALA | 155 | 6.226-115.333 | 23.105 | 1.00 | 0.00 |
| N    |       |     |     |     |               |        |      |      |
| ATOM | 10677 | CA  | ALA | 155 | 5.552-116.332 | 22.279 | 1.00 | 0.00 |
| C    |       |     |     |     |               |        |      |      |
| ATOM | 10678 | CB  | ALA | 155 | 5.443-115.824 | 20.853 | 1.00 | 0.00 |
| C    |       |     |     |     |               |        |      |      |
| ATOM | 10679 | C   | ALA | 155 | 6.226-117.816 | 22.258 | 1.00 | 0.00 |
| C    |       |     |     |     |               |        |      |      |
| ATOM | 10680 | O   | ALA | 155 | 7.432-117.954 | 22.498 | 1.00 | 0.00 |
| O    |       |     |     |     |               |        |      |      |
| ATOM | 10681 | N   | ARG | 156 | 5.400-118.774 | 21.815 | 1.00 | 0.00 |
| N    |       |     |     |     |               |        |      |      |
| ATOM | 10682 | CA  | ARG | 156 | 5.867-120.097 | 21.323 | 1.00 | 0.00 |
| C    |       |     |     |     |               |        |      |      |

|      |       |     |     |     |               |        |      |      |
|------|-------|-----|-----|-----|---------------|--------|------|------|
| ATOM | 10683 | CB  | ARG | 156 | 5.254-121.171 | 22.194 | 1.00 | 0.00 |
| C    |       |     |     |     |               |        |      |      |
| ATOM | 10684 | CG  | ARG | 156 | 5.874-122.621 | 22.090 | 1.00 | 0.00 |
| C    |       |     |     |     |               |        |      |      |
| ATOM | 10685 | CD  | ARG | 156 | 5.598-123.464 | 23.365 | 1.00 | 0.00 |
| C    |       |     |     |     |               |        |      |      |
| ATOM | 10686 | NE  | ARG | 156 | 6.541-123.105 | 24.412 | 1.00 | 0.00 |
| N    |       |     |     |     |               |        |      |      |
| ATOM | 10687 | CZ  | ARG | 156 | 6.701-123.904 | 25.469 | 1.00 | 0.00 |
| C    |       |     |     |     |               |        |      |      |
| ATOM | 10688 | NH1 | ARG | 156 | 5.864-124.771 | 25.883 | 1.00 | 0.00 |
| N    |       |     |     |     |               |        |      |      |
| ATOM | 10689 | NH2 | ARG | 156 | 7.760-123.718 | 26.204 | 1.00 | 0.00 |
| N1+  |       |     |     |     |               |        |      |      |
| ATOM | 10690 | C   | ARG | 156 | 5.610-120.265 | 19.849 | 1.00 | 0.00 |
| C    |       |     |     |     |               |        |      |      |
| ATOM | 10691 | O   | ARG | 156 | 4.655-119.754 | 19.220 | 1.00 | 0.00 |
| O    |       |     |     |     |               |        |      |      |
| ATOM | 10692 | N   | LEU | 157 | 6.559-121.064 | 19.212 | 1.00 | 0.00 |
| N    |       |     |     |     |               |        |      |      |
| ATOM | 10693 | CA  | LEU | 157 | 6.618-121.296 | 17.785 | 1.00 | 0.00 |
| C    |       |     |     |     |               |        |      |      |
| ATOM | 10694 | CB  | LEU | 157 | 7.766-120.436 | 17.187 | 1.00 | 0.00 |
| C    |       |     |     |     |               |        |      |      |
| ATOM | 10695 | CG  | LEU | 157 | 7.677-118.893 | 17.058 | 1.00 | 0.00 |
| C    |       |     |     |     |               |        |      |      |
| ATOM | 10696 | CD1 | LEU | 157 | 6.472-118.385 | 16.307 | 1.00 | 0.00 |
| C    |       |     |     |     |               |        |      |      |
| ATOM | 10697 | CD2 | LEU | 157 | 7.896-118.112 | 18.406 | 1.00 | 0.00 |
| C    |       |     |     |     |               |        |      |      |
| ATOM | 10698 | C   | LEU | 157 | 6.736-122.796 | 17.394 | 1.00 | 0.00 |
| C    |       |     |     |     |               |        |      |      |
| ATOM | 10699 | O   | LEU | 157 | 7.334-123.539 | 18.158 | 1.00 | 0.00 |
| O    |       |     |     |     |               |        |      |      |
| ATOM | 10700 | N   | ARG | 158 | 6.139-123.201 | 16.272 | 1.00 | 0.00 |
| N    |       |     |     |     |               |        |      |      |
| ATOM | 10701 | CA  | ARG | 158 | 6.065-124.607 | 15.802 | 1.00 | 0.00 |
| C    |       |     |     |     |               |        |      |      |
| ATOM | 10702 | CB  | ARG | 158 | 4.822-125.110 | 16.529 | 1.00 | 0.00 |
| C    |       |     |     |     |               |        |      |      |
| ATOM | 10703 | CG  | ARG | 158 | 4.365-126.501 | 15.936 | 1.00 | 0.00 |
| C    |       |     |     |     |               |        |      |      |
| ATOM | 10704 | CD  | ARG | 158 | 3.564-127.299 | 17.028 | 1.00 | 0.00 |
| C    |       |     |     |     |               |        |      |      |
| ATOM | 10705 | NE  | ARG | 158 | 2.161-126.910 | 17.062 | 1.00 | 0.00 |
| N    |       |     |     |     |               |        |      |      |
| ATOM | 10706 | CZ  | ARG | 158 | 1.293-127.310 | 17.991 | 1.00 | 0.00 |
| C    |       |     |     |     |               |        |      |      |
| ATOM | 10707 | NH1 | ARG | 158 | 1.693-128.036 | 18.971 | 1.00 | 0.00 |
| N    |       |     |     |     |               |        |      |      |
| ATOM | 10708 | NH2 | ARG | 158 | 0.075-126.990 | 17.878 | 1.00 | 0.00 |
| N1+  |       |     |     |     |               |        |      |      |
| ATOM | 10709 | C   | ARG | 158 | 5.924-124.633 | 14.277 | 1.00 | 0.00 |
| C    |       |     |     |     |               |        |      |      |



|      |       |     |     |     |                |        |      |      |
|------|-------|-----|-----|-----|----------------|--------|------|------|
| ATOM | 10710 | O   | ARG | 158 | 4.939-124.221  | 13.722 | 1.00 | 0.00 |
| O    |       |     |     |     |                |        |      |      |
| ATOM | 10711 | N   | THR | 159 | 6.979-125.167  | 13.590 | 1.00 | 0.00 |
| N    |       |     |     |     |                |        |      |      |
| ATOM | 10712 | CA  | THR | 159 | 7.027-125.229  | 12.138 | 1.00 | 0.00 |
| C    |       |     |     |     |                |        |      |      |
| ATOM | 10713 | CB  | THR | 159 | 8.466-125.059  | 11.554 | 1.00 | 0.00 |
| C    |       |     |     |     |                |        |      |      |
| ATOM | 10714 | CG2 | THR | 159 | 8.834-123.546  | 11.637 | 1.00 | 0.00 |
| C    |       |     |     |     |                |        |      |      |
| ATOM | 10715 | OG1 | THR | 159 | 9.372-125.881  | 12.315 | 1.00 | 0.00 |
| O    |       |     |     |     |                |        |      |      |
| ATOM | 10716 | C   | THR | 159 | 6.189-126.364  | 11.614 | 1.00 | 0.00 |
| C    |       |     |     |     |                |        |      |      |
| ATOM | 10717 | O   | THR | 159 | 5.741-127.322  | 12.309 | 1.00 | 0.00 |
| O    |       |     |     |     |                |        |      |      |
| ATOM | 10718 | N   | ALA | 160 | 5.968-126.344  | 10.260 | 1.00 | 0.00 |
| N    |       |     |     |     |                |        |      |      |
| ATOM | 10719 | CA  | ALA | 160 | 5.374-127.403  | 9.527  | 1.00 | 0.00 |
| C    |       |     |     |     |                |        |      |      |
| ATOM | 10720 | CB  | ALA | 160 | 4.940-126.879  | 8.219  | 1.00 | 0.00 |
| C    |       |     |     |     |                |        |      |      |
| ATOM | 10721 | C   | ALA | 160 | 6.282-128.624  | 9.481  | 1.00 | 0.00 |
| C    |       |     |     |     |                |        |      |      |
| ATOM | 10722 | O   | ALA | 160 | 5.751-129.746  | 9.282  | 1.00 | 0.00 |
| O    |       |     |     |     |                |        |      |      |
| ATOM | 10723 | N   | GLY | 161 | 7.624-128.425  | 9.613  | 1.00 | 0.00 |
| N    |       |     |     |     |                |        |      |      |
| ATOM | 10724 | CA  | GLY | 161 | 8.785-129.341  | 9.262  | 1.00 | 0.00 |
| C    |       |     |     |     |                |        |      |      |
| ATOM | 10725 | C   | GLY | 161 | 10.065-128.865 | 9.942  | 1.00 | 0.00 |
| C    |       |     |     |     |                |        |      |      |
| ATOM | 10726 | O   | GLY | 161 | 10.099-127.858 | 10.639 | 1.00 | 0.00 |
| O    |       |     |     |     |                |        |      |      |
| ATOM | 10727 | N   | THR | 162 | 11.068-129.687 | 9.755  | 1.00 | 0.00 |
| N    |       |     |     |     |                |        |      |      |
| ATOM | 10728 | CA  | THR | 162 | 12.352-129.644 | 10.516 | 1.00 | 0.00 |
| C    |       |     |     |     |                |        |      |      |
| ATOM | 10729 | CB  | THR | 162 | 12.908-131.022 | 10.674 | 1.00 | 0.00 |
| C    |       |     |     |     |                |        |      |      |
| ATOM | 10730 | CG2 | THR | 162 | 14.131-131.011 | 11.602 | 1.00 | 0.00 |
| C    |       |     |     |     |                |        |      |      |
| ATOM | 10731 | OG1 | THR | 162 | 11.947-131.762 | 11.353 | 1.00 | 0.00 |
| O    |       |     |     |     |                |        |      |      |
| ATOM | 10732 | C   | THR | 162 | 13.342-128.627 | 9.833  | 1.00 | 0.00 |
| C    |       |     |     |     |                |        |      |      |
| ATOM | 10733 | O   | THR | 162 | 13.437-128.640 | 8.580  | 1.00 | 0.00 |
| O    |       |     |     |     |                |        |      |      |
| ATOM | 10734 | N   | ILE | 163 | 13.928-127.804 | 10.669 | 1.00 | 0.00 |
| N    |       |     |     |     |                |        |      |      |
| ATOM | 10735 | CA  | ILE | 163 | 14.822-126.702 | 10.302 | 1.00 | 0.00 |
| C    |       |     |     |     |                |        |      |      |
| ATOM | 10736 | CB  | ILE | 163 | 14.073-125.462 | 10.159 | 1.00 | 0.00 |
| C    |       |     |     |     |                |        |      |      |

|      |       |     |     |     |                |        |      |      |
|------|-------|-----|-----|-----|----------------|--------|------|------|
| ATOM | 10737 | CG2 | ILE | 163 | 13.095-125.485 | 8.913  | 1.00 | 0.00 |
| C    |       |     |     |     |                |        |      |      |
| ATOM | 10738 | CG1 | ILE | 163 | 13.292-125.141 | 11.494 | 1.00 | 0.00 |
| C    |       |     |     |     |                |        |      |      |
| ATOM | 10739 | CD1 | ILE | 163 | 12.774-123.678 | 11.592 | 1.00 | 0.00 |
| C    |       |     |     |     |                |        |      |      |
| ATOM | 10740 | C   | ILE | 163 | 16.052-126.573 | 11.224 | 1.00 | 0.00 |
| C    |       |     |     |     |                |        |      |      |
| ATOM | 10741 | O   | ILE | 163 | 16.004-126.985 | 12.360 | 1.00 | 0.00 |
| O    |       |     |     |     |                |        |      |      |
| ATOM | 10742 | N   | CYS | 164 | 17.167-126.169 | 10.680 | 1.00 | 0.00 |
| N    |       |     |     |     |                |        |      |      |
| ATOM | 10743 | CA  | CYS | 164 | 18.449-125.848 | 11.405 | 1.00 | 0.00 |
| C    |       |     |     |     |                |        |      |      |
| ATOM | 10744 | CB  | CYS | 164 | 19.674-126.087 | 10.486 | 1.00 | 0.00 |
| C    |       |     |     |     |                |        |      |      |
| ATOM | 10745 | SG  | CYS | 164 | 21.177-126.039 | 11.461 | 1.00 | 0.00 |
| S    |       |     |     |     |                |        |      |      |
| ATOM | 10746 | C   | CYS | 164 | 18.394-124.430 | 12.071 | 1.00 | 0.00 |
| C    |       |     |     |     |                |        |      |      |
| ATOM | 10747 | O   | CYS | 164 | 17.908-123.433 | 11.517 | 1.00 | 0.00 |
| O    |       |     |     |     |                |        |      |      |
| ATOM | 10748 | N   | LEU | 165 | 18.796-124.342 | 13.359 | 1.00 | 0.00 |
| N    |       |     |     |     |                |        |      |      |
| ATOM | 10749 | CA  | LEU | 165 | 18.506-123.182 | 14.177 | 1.00 | 0.00 |
| C    |       |     |     |     |                |        |      |      |
| ATOM | 10750 | CB  | LEU | 165 | 17.340-123.489 | 15.105 | 1.00 | 0.00 |
| C    |       |     |     |     |                |        |      |      |
| ATOM | 10751 | CG  | LEU | 165 | 15.969-123.754 | 14.501 | 1.00 | 0.00 |
| C    |       |     |     |     |                |        |      |      |
| ATOM | 10752 | CD1 | LEU | 165 | 15.177-124.772 | 15.315 | 1.00 | 0.00 |
| C    |       |     |     |     |                |        |      |      |
| ATOM | 10753 | CD2 | LEU | 165 | 15.191-122.469 | 14.194 | 1.00 | 0.00 |
| C    |       |     |     |     |                |        |      |      |
| ATOM | 10754 | C   | LEU | 165 | 19.700-122.955 | 15.144 | 1.00 | 0.00 |
| C    |       |     |     |     |                |        |      |      |
| ATOM | 10755 | O   | LEU | 165 | 20.505-123.864 | 15.531 | 1.00 | 0.00 |
| O    |       |     |     |     |                |        |      |      |
| ATOM | 10756 | N   | GLU | 166 | 19.659-121.715 | 15.689 | 1.00 | 0.00 |
| N    |       |     |     |     |                |        |      |      |
| ATOM | 10757 | CA  | GLU | 166 | 20.598-121.187 | 16.684 | 1.00 | 0.00 |
| C    |       |     |     |     |                |        |      |      |
| ATOM | 10758 | CB  | GLU | 166 | 21.860-120.487 | 16.006 | 1.00 | 0.00 |
| C    |       |     |     |     |                |        |      |      |
| ATOM | 10759 | CG  | GLU | 166 | 23.062-121.316 | 15.555 | 1.00 | 0.00 |
| C    |       |     |     |     |                |        |      |      |
| ATOM | 10760 | CD  | GLU | 166 | 23.649-122.205 | 16.635 | 1.00 | 0.00 |
| C    |       |     |     |     |                |        |      |      |
| ATOM | 10761 | OE1 | GLU | 166 | 24.424-123.122 | 16.251 | 1.00 | 0.00 |
| O    |       |     |     |     |                |        |      |      |
| ATOM | 10762 | OE2 | GLU | 166 | 23.541-121.922 | 17.813 | 1.00 | 0.00 |
| O1-  |       |     |     |     |                |        |      |      |
| ATOM | 10763 | C   | GLU | 166 | 19.866-120.126 | 17.595 | 1.00 | 0.00 |
| C    |       |     |     |     |                |        |      |      |

|      |       |     |     |     |                |        |      |      |
|------|-------|-----|-----|-----|----------------|--------|------|------|
| ATOM | 10764 | O   | GLU | 166 | 19.069-119.341 | 17.015 | 1.00 | 0.00 |
| O    |       |     |     |     |                |        |      |      |
| ATOM | 10765 | N   | THR | 167 | 20.153-119.996 | 18.877 | 1.00 | 0.00 |
| N    |       |     |     |     |                |        |      |      |
| ATOM | 10766 | CA  | THR | 167 | 19.590-119.050 | 19.827 | 1.00 | 0.00 |
| C    |       |     |     |     |                |        |      |      |
| ATOM | 10767 | CB  | THR | 167 | 19.391-119.751 | 21.221 | 1.00 | 0.00 |
| C    |       |     |     |     |                |        |      |      |
| ATOM | 10768 | CG2 | THR | 167 | 18.673-121.109 | 20.878 | 1.00 | 0.00 |
| C    |       |     |     |     |                |        |      |      |
| ATOM | 10769 | OG1 | THR | 167 | 20.621-119.930 | 21.812 | 1.00 | 0.00 |
| O    |       |     |     |     |                |        |      |      |
| ATOM | 10770 | C   | THR | 167 | 20.356-117.680 | 19.962 | 1.00 | 0.00 |
| C    |       |     |     |     |                |        |      |      |
| ATOM | 10771 | O   | THR | 167 | 21.560-117.529 | 19.697 | 1.00 | 0.00 |
| O    |       |     |     |     |                |        |      |      |
| ATOM | 10772 | N   | PHE | 168 | 19.651-116.628 | 20.373 | 1.00 | 0.00 |
| N    |       |     |     |     |                |        |      |      |
| ATOM | 10773 | CA  | PHE | 168 | 20.084-115.205 | 20.440 | 1.00 | 0.00 |
| C    |       |     |     |     |                |        |      |      |
| ATOM | 10774 | CB  | PHE | 168 | 18.891-114.319 | 20.837 | 1.00 | 0.00 |
| C    |       |     |     |     |                |        |      |      |
| ATOM | 10775 | CG  | PHE | 168 | 19.129-112.834 | 20.663 | 1.00 | 0.00 |
| C    |       |     |     |     |                |        |      |      |
| ATOM | 10776 | CD1 | PHE | 168 | 19.426-112.024 | 21.770 | 1.00 | 0.00 |
| C    |       |     |     |     |                |        |      |      |
| ATOM | 10777 | CE1 | PHE | 168 | 19.643-110.654 | 21.608 | 1.00 | 0.00 |
| C    |       |     |     |     |                |        |      |      |
| ATOM | 10778 | CZ  | PHE | 168 | 19.562-110.080 | 20.341 | 1.00 | 0.00 |
| C    |       |     |     |     |                |        |      |      |
| ATOM | 10779 | CE2 | PHE | 168 | 19.272-110.874 | 19.234 | 1.00 | 0.00 |
| C    |       |     |     |     |                |        |      |      |
| ATOM | 10780 | CD2 | PHE | 168 | 19.066-112.246 | 19.392 | 1.00 | 0.00 |
| C    |       |     |     |     |                |        |      |      |
| ATOM | 10781 | C   | PHE | 168 | 21.293-114.836 | 21.241 | 1.00 | 0.00 |
| C    |       |     |     |     |                |        |      |      |
| ATOM | 10782 | O   | PHE | 168 | 22.018-113.870 | 20.983 | 1.00 | 0.00 |
| O    |       |     |     |     |                |        |      |      |
| ATOM | 10783 | N   | LYS | 169 | 21.603-115.609 | 22.295 | 1.00 | 0.00 |
| N    |       |     |     |     |                |        |      |      |
| ATOM | 10784 | CA  | LYS | 169 | 22.745-115.498 | 23.162 | 1.00 | 0.00 |
| C    |       |     |     |     |                |        |      |      |
| ATOM | 10785 | CB  | LYS | 169 | 22.393-116.067 | 24.504 | 1.00 | 0.00 |
| C    |       |     |     |     |                |        |      |      |
| ATOM | 10786 | CG  | LYS | 169 | 23.569-115.933 | 25.460 | 1.00 | 0.00 |
| C    |       |     |     |     |                |        |      |      |
| ATOM | 10787 | CD  | LYS | 169 | 24.039-114.588 | 25.900 | 1.00 | 0.00 |
| C    |       |     |     |     |                |        |      |      |
| ATOM | 10788 | CE  | LYS | 169 | 25.285-114.727 | 26.748 | 1.00 | 0.00 |
| C    |       |     |     |     |                |        |      |      |
| ATOM | 10789 | NZ  | LYS | 169 | 25.829-113.391 | 27.200 | 1.00 | 0.00 |
| N1+  |       |     |     |     |                |        |      |      |
| ATOM | 10790 | C   | LYS | 169 | 23.975-116.204 | 22.526 | 1.00 | 0.00 |
| C    |       |     |     |     |                |        |      |      |

|      |       |     |     |     |                |        |      |      |
|------|-------|-----|-----|-----|----------------|--------|------|------|
| ATOM | 10791 | O   | LYS | 169 | 24.998-115.564 | 22.461 | 1.00 | 0.00 |
| O    |       |     |     |     |                |        |      |      |
| ATOM | 10792 | N   | ASP | 170 | 23.921-117.415 | 21.984 | 1.00 | 0.00 |
| N    |       |     |     |     |                |        |      |      |
| ATOM | 10793 | CA  | ASP | 170 | 25.077-117.975 | 21.259 | 1.00 | 0.00 |
| C    |       |     |     |     |                |        |      |      |
| ATOM | 10794 | CB  | ASP | 170 | 24.780-119.445 | 20.924 | 1.00 | 0.00 |
| C    |       |     |     |     |                |        |      |      |
| ATOM | 10795 | CG  | ASP | 170 | 24.552-120.401 | 22.107 | 1.00 | 0.00 |
| C    |       |     |     |     |                |        |      |      |
| ATOM | 10796 | OD1 | ASP | 170 | 23.595-121.190 | 22.122 | 1.00 | 0.00 |
| O    |       |     |     |     |                |        |      |      |
| ATOM | 10797 | OD2 | ASP | 170 | 25.360-120.315 | 23.083 | 1.00 | 0.00 |
| O1-  |       |     |     |     |                |        |      |      |
| ATOM | 10798 | C   | ASP | 170 | 25.330-117.177 | 19.888 | 1.00 | 0.00 |
| C    |       |     |     |     |                |        |      |      |
| ATOM | 10799 | O   | ASP | 170 | 26.476-116.918 | 19.505 | 1.00 | 0.00 |
| O    |       |     |     |     |                |        |      |      |
| ATOM | 10800 | N   | PHE | 171 | 24.326-116.661 | 19.158 | 1.00 | 0.00 |
| N    |       |     |     |     |                |        |      |      |
| ATOM | 10801 | CA  | PHE | 171 | 24.546-115.943 | 17.881 | 1.00 | 0.00 |
| C    |       |     |     |     |                |        |      |      |
| ATOM | 10802 | CB  | PHE | 171 | 24.648-116.975 | 16.719 | 1.00 | 0.00 |
| C    |       |     |     |     |                |        |      |      |
| ATOM | 10803 | CG  | PHE | 171 | 25.873-117.975 | 16.782 | 1.00 | 0.00 |
| C    |       |     |     |     |                |        |      |      |
| ATOM | 10804 | CD1 | PHE | 171 | 27.127-117.454 | 16.568 | 1.00 | 0.00 |
| C    |       |     |     |     |                |        |      |      |
| ATOM | 10805 | CE1 | PHE | 171 | 28.261-118.358 | 16.762 | 1.00 | 0.00 |
| C    |       |     |     |     |                |        |      |      |
| ATOM | 10806 | CZ  | PHE | 171 | 28.041-119.706 | 17.074 | 1.00 | 0.00 |
| C    |       |     |     |     |                |        |      |      |
| ATOM | 10807 | CE2 | PHE | 171 | 26.702-120.201 | 17.257 | 1.00 | 0.00 |
| C    |       |     |     |     |                |        |      |      |
| ATOM | 10808 | CD2 | PHE | 171 | 25.628-119.325 | 17.106 | 1.00 | 0.00 |
| C    |       |     |     |     |                |        |      |      |
| ATOM | 10809 | C   | PHE | 171 | 23.429-114.928 | 17.610 | 1.00 | 0.00 |
| C    |       |     |     |     |                |        |      |      |
| ATOM | 10810 | O   | PHE | 171 | 22.449-115.358 | 16.982 | 1.00 | 0.00 |
| O    |       |     |     |     |                |        |      |      |
| ATOM | 10811 | N   | PRO | 172 | 23.415-113.656 | 18.052 | 1.00 | 0.00 |
| N    |       |     |     |     |                |        |      |      |
| ATOM | 10812 | CD  | PRO | 172 | 24.499-112.935 | 18.684 | 1.00 | 0.00 |
| C    |       |     |     |     |                |        |      |      |
| ATOM | 10813 | CG  | PRO | 172 | 24.067-111.440 | 18.569 | 1.00 | 0.00 |
| C    |       |     |     |     |                |        |      |      |
| ATOM | 10814 | CB  | PRO | 172 | 22.635-111.438 | 18.621 | 1.00 | 0.00 |
| C    |       |     |     |     |                |        |      |      |
| ATOM | 10815 | CA  | PRO | 172 | 22.238-112.747 | 17.886 | 1.00 | 0.00 |
| C    |       |     |     |     |                |        |      |      |
| ATOM | 10816 | C   | PRO | 172 | 21.783-112.615 | 16.407 | 1.00 | 0.00 |
| C    |       |     |     |     |                |        |      |      |
| ATOM | 10817 | O   | PRO | 172 | 20.627-112.417 | 16.130 | 1.00 | 0.00 |
| O    |       |     |     |     |                |        |      |      |

|      |       |     |     |     |                |        |      |      |
|------|-------|-----|-----|-----|----------------|--------|------|------|
| ATOM | 10818 | N   | GLN | 173 | 22.644-112.776 | 15.380 | 1.00 | 0.00 |
| N    |       |     |     |     |                |        |      |      |
| ATOM | 10819 | CA  | GLN | 173 | 22.249-112.659 | 13.945 | 1.00 | 0.00 |
| C    |       |     |     |     |                |        |      |      |
| ATOM | 10820 | CB  | GLN | 173 | 23.464-112.170 | 13.134 | 1.00 | 0.00 |
| C    |       |     |     |     |                |        |      |      |
| ATOM | 10821 | CG  | GLN | 173 | 24.458-113.149 | 12.578 | 1.00 | 0.00 |
| C    |       |     |     |     |                |        |      |      |
| ATOM | 10822 | CD  | GLN | 173 | 25.472-113.660 | 13.569 | 1.00 | 0.00 |
| C    |       |     |     |     |                |        |      |      |
| ATOM | 10823 | OE1 | GLN | 173 | 25.178-113.718 | 14.748 | 1.00 | 0.00 |
| O    |       |     |     |     |                |        |      |      |
| ATOM | 10824 | NE2 | GLN | 173 | 26.515-114.203 | 13.087 | 1.00 | 0.00 |
| N    |       |     |     |     |                |        |      |      |
| ATOM | 10825 | C   | GLN | 173 | 21.596-113.905 | 13.275 | 1.00 | 0.00 |
| C    |       |     |     |     |                |        |      |      |
| ATOM | 10826 | O   | GLN | 173 | 21.117-113.806 | 12.160 | 1.00 | 0.00 |
| O    |       |     |     |     |                |        |      |      |
| ATOM | 10827 | N   | MET | 174 | 21.510-114.994 | 14.028 | 1.00 | 0.00 |
| N    |       |     |     |     |                |        |      |      |
| ATOM | 10828 | CA  | MET | 174 | 20.811-116.229 | 13.698 | 1.00 | 0.00 |
| C    |       |     |     |     |                |        |      |      |
| ATOM | 10829 | CB  | MET | 174 | 21.719-117.496 | 13.724 | 1.00 | 0.00 |
| C    |       |     |     |     |                |        |      |      |
| ATOM | 10830 | CG  | MET | 174 | 22.632-117.485 | 12.527 | 1.00 | 0.00 |
| C    |       |     |     |     |                |        |      |      |
| ATOM | 10831 | SD  | MET | 174 | 23.840-118.787 | 12.678 | 1.00 | 0.00 |
| S    |       |     |     |     |                |        |      |      |
| ATOM | 10832 | CE  | MET | 174 | 23.048-120.099 | 11.729 | 1.00 | 0.00 |
| C    |       |     |     |     |                |        |      |      |
| ATOM | 10833 | C   | MET | 174 | 19.640-116.508 | 14.660 | 1.00 | 0.00 |
| C    |       |     |     |     |                |        |      |      |
| ATOM | 10834 | O   | MET | 174 | 18.656-117.177 | 14.308 | 1.00 | 0.00 |
| O    |       |     |     |     |                |        |      |      |
| ATOM | 10835 | N   | GLY | 175 | 19.771-116.065 | 15.897 | 1.00 | 0.00 |
| N    |       |     |     |     |                |        |      |      |
| ATOM | 10836 | CA  | GLY | 175 | 18.673-116.130 | 16.855 | 1.00 | 0.00 |
| C    |       |     |     |     |                |        |      |      |
| ATOM | 10837 | C   | GLY | 175 | 17.624-115.074 | 16.600 | 1.00 | 0.00 |
| C    |       |     |     |     |                |        |      |      |
| ATOM | 10838 | O   | GLY | 175 | 16.495-115.381 | 17.005 | 1.00 | 0.00 |
| O    |       |     |     |     |                |        |      |      |
| ATOM | 10839 | N   | ARG | 176 | 17.879-113.964 | 15.892 | 1.00 | 0.00 |
| N    |       |     |     |     |                |        |      |      |
| ATOM | 10840 | CA  | ARG | 176 | 16.809-113.127 | 15.373 | 1.00 | 0.00 |
| C    |       |     |     |     |                |        |      |      |
| ATOM | 10841 | CB  | ARG | 176 | 17.317-111.842 | 14.782 | 1.00 | 0.00 |
| C    |       |     |     |     |                |        |      |      |
| ATOM | 10842 | CG  | ARG | 176 | 18.348-112.001 | 13.639 | 1.00 | 0.00 |
| C    |       |     |     |     |                |        |      |      |
| ATOM | 10843 | CD  | ARG | 176 | 19.187-110.759 | 13.354 | 1.00 | 0.00 |
| C    |       |     |     |     |                |        |      |      |
| ATOM | 10844 | NE  | ARG | 176 | 18.294-109.619 | 12.903 | 1.00 | 0.00 |
| N    |       |     |     |     |                |        |      |      |

|      |       |     |     |     |                |        |      |      |
|------|-------|-----|-----|-----|----------------|--------|------|------|
| ATOM | 10845 | CZ  | ARG | 176 | 18.769-108.366 | 12.663 | 1.00 | 0.00 |
| C    |       |     |     |     |                |        |      |      |
| ATOM | 10846 | NH1 | ARG | 176 | 18.062-107.458 | 12.040 | 1.00 | 0.00 |
| N    |       |     |     |     |                |        |      |      |
| ATOM | 10847 | NH2 | ARG | 176 | 19.954-108.045 | 12.909 | 1.00 | 0.00 |
| N1+  |       |     |     |     |                |        |      |      |
| ATOM | 10848 | C   | ARG | 176 | 16.013-113.820 | 14.217 | 1.00 | 0.00 |
| C    |       |     |     |     |                |        |      |      |
| ATOM | 10849 | O   | ARG | 176 | 16.546-114.572 | 13.373 | 1.00 | 0.00 |
| O    |       |     |     |     |                |        |      |      |
| ATOM | 10850 | N   | PHE | 177 | 14.702-113.593 | 14.142 | 1.00 | 0.00 |
| N    |       |     |     |     |                |        |      |      |
| ATOM | 10851 | CA  | PHE | 177 | 13.918-113.968 | 12.959 | 1.00 | 0.00 |
| C    |       |     |     |     |                |        |      |      |
| ATOM | 10852 | CB  | PHE | 177 | 13.361-115.338 | 13.286 | 1.00 | 0.00 |
| C    |       |     |     |     |                |        |      |      |
| ATOM | 10853 | CG  | PHE | 177 | 12.428-115.448 | 14.528 | 1.00 | 0.00 |
| C    |       |     |     |     |                |        |      |      |
| ATOM | 10854 | CD1 | PHE | 177 | 11.066-115.282 | 14.327 | 1.00 | 0.00 |
| C    |       |     |     |     |                |        |      |      |
| ATOM | 10855 | CE1 | PHE | 177 | 10.194-115.424 | 15.395 | 1.00 | 0.00 |
| C    |       |     |     |     |                |        |      |      |
| ATOM | 10856 | CZ  | PHE | 177 | 10.694-115.758 | 16.654 | 1.00 | 0.00 |
| C    |       |     |     |     |                |        |      |      |
| ATOM | 10857 | CE2 | PHE | 177 | 12.055-115.852 | 16.854 | 1.00 | 0.00 |
| C    |       |     |     |     |                |        |      |      |
| ATOM | 10858 | CD2 | PHE | 177 | 12.956-115.672 | 15.803 | 1.00 | 0.00 |
| C    |       |     |     |     |                |        |      |      |
| ATOM | 10859 | C   | PHE | 177 | 12.831-112.919 | 12.666 | 1.00 | 0.00 |
| C    |       |     |     |     |                |        |      |      |
| ATOM | 10860 | O   | PHE | 177 | 12.715-111.951 | 13.437 | 1.00 | 0.00 |
| O    |       |     |     |     |                |        |      |      |
| ATOM | 10861 | N   | THR | 178 | 12.113-113.084 | 11.562 | 1.00 | 0.00 |
| N    |       |     |     |     |                |        |      |      |
| ATOM | 10862 | CA  | THR | 178 | 11.038-112.183 | 11.143 | 1.00 | 0.00 |
| C    |       |     |     |     |                |        |      |      |
| ATOM | 10863 | CB  | THR | 178 | 11.330-111.286 | 9.900  | 1.00 | 0.00 |
| C    |       |     |     |     |                |        |      |      |
| ATOM | 10864 | CG2 | THR | 178 | 10.206-110.279 | 9.726  | 1.00 | 0.00 |
| C    |       |     |     |     |                |        |      |      |
| ATOM | 10865 | OG1 | THR | 178 | 12.462-110.476 | 10.127 | 1.00 | 0.00 |
| O    |       |     |     |     |                |        |      |      |
| ATOM | 10866 | C   | THR | 178 | 9.843-113.092  | 10.889 | 1.00 | 0.00 |
| C    |       |     |     |     |                |        |      |      |
| ATOM | 10867 | O   | THR | 178 | 10.031-114.213 | 10.386 | 1.00 | 0.00 |
| O    |       |     |     |     |                |        |      |      |
| ATOM | 10868 | N   | LEU | 179 | 8.562-112.622  | 11.196 | 1.00 | 0.00 |
| N    |       |     |     |     |                |        |      |      |
| ATOM | 10869 | CA  | LEU | 179 | 7.255-113.267  | 10.923 | 1.00 | 0.00 |
| C    |       |     |     |     |                |        |      |      |
| ATOM | 10870 | CB  | LEU | 179 | 6.501-113.514  | 12.266 | 1.00 | 0.00 |
| C    |       |     |     |     |                |        |      |      |
| ATOM | 10871 | CG  | LEU | 179 | 7.121-114.494  | 13.323 | 1.00 | 0.00 |
| C    |       |     |     |     |                |        |      |      |

|      |       |     |     |     |                |        |      |      |
|------|-------|-----|-----|-----|----------------|--------|------|------|
| ATOM | 10872 | CD1 | LEU | 179 | 6.421-114.362  | 14.713 | 1.00 | 0.00 |
| C    |       |     |     |     |                |        |      |      |
| ATOM | 10873 | CD2 | LEU | 179 | 7.138-115.977  | 12.880 | 1.00 | 0.00 |
| C    |       |     |     |     |                |        |      |      |
| ATOM | 10874 | C   | LEU | 179 | 6.557-112.429  | 9.871  | 1.00 | 0.00 |
| C    |       |     |     |     |                |        |      |      |
| ATOM | 10875 | O   | LEU | 179 | 6.595-111.206  | 9.949  | 1.00 | 0.00 |
| O    |       |     |     |     |                |        |      |      |
| ATOM | 10876 | N   | ARG | 180 | 5.976-113.108  | 8.861  | 1.00 | 0.00 |
| N    |       |     |     |     |                |        |      |      |
| ATOM | 10877 | CA  | ARG | 180 | 5.395-112.489  | 7.703  | 1.00 | 0.00 |
| C    |       |     |     |     |                |        |      |      |
| ATOM | 10878 | CB  | ARG | 180 | 6.471-112.515  | 6.540  | 1.00 | 0.00 |
| C    |       |     |     |     |                |        |      |      |
| ATOM | 10879 | CG  | ARG | 180 | 5.898-112.435  | 5.087  | 1.00 | 0.00 |
| C    |       |     |     |     |                |        |      |      |
| ATOM | 10880 | CD  | ARG | 180 | 7.018-111.911  | 4.224  | 1.00 | 0.00 |
| C    |       |     |     |     |                |        |      |      |
| ATOM | 10881 | NE  | ARG | 180 | 7.945-112.973  | 4.103  | 1.00 | 0.00 |
| N    |       |     |     |     |                |        |      |      |
| ATOM | 10882 | CZ  | ARG | 180 | 9.223-113.091  | 4.420  | 1.00 | 0.00 |
| C    |       |     |     |     |                |        |      |      |
| ATOM | 10883 | NH1 | ARG | 180 | 9.786-112.263  | 5.269  | 1.00 | 0.00 |
| N    |       |     |     |     |                |        |      |      |
| ATOM | 10884 | NH2 | ARG | 180 | 9.868-114.213  | 3.983  | 1.00 | 0.00 |
| N1+  |       |     |     |     |                |        |      |      |
| ATOM | 10885 | C   | ARG | 180 | 4.090-113.117  | 7.324  | 1.00 | 0.00 |
| C    |       |     |     |     |                |        |      |      |
| ATOM | 10886 | O   | ARG | 180 | 3.896-114.328  | 7.490  | 1.00 | 0.00 |
| O    |       |     |     |     |                |        |      |      |
| ATOM | 10887 | N   | ASP | 181 | 3.055-112.337  | 6.897  | 1.00 | 0.00 |
| N    |       |     |     |     |                |        |      |      |
| ATOM | 10888 | CA  | ASP | 181 | 1.838-112.856  | 6.338  | 1.00 | 0.00 |
| C    |       |     |     |     |                |        |      |      |
| ATOM | 10889 | CB  | ASP | 181 | 0.880-113.279  | 7.495  | 1.00 | 0.00 |
| C    |       |     |     |     |                |        |      |      |
| ATOM | 10890 | CG  | ASP | 181 | -0.391-113.952 | 7.040  | 1.00 | 0.00 |
| C    |       |     |     |     |                |        |      |      |
| ATOM | 10891 | OD1 | ASP | 181 | -1.423-113.911 | 7.744  | 1.00 | 0.00 |
| O    |       |     |     |     |                |        |      |      |
| ATOM | 10892 | OD2 | ASP | 181 | -0.369-114.538 | 5.939  | 1.00 | 0.00 |
| O1-  |       |     |     |     |                |        |      |      |
| ATOM | 10893 | C   | ASP | 181 | 1.227-111.830  | 5.378  | 1.00 | 0.00 |
| C    |       |     |     |     |                |        |      |      |
| ATOM | 10894 | O   | ASP | 181 | 1.533-110.596  | 5.422  | 1.00 | 0.00 |
| O    |       |     |     |     |                |        |      |      |
| ATOM | 10895 | N   | GLU | 182 | 0.463-112.327  | 4.451  | 1.00 | 0.00 |
| N    |       |     |     |     |                |        |      |      |
| ATOM | 10896 | CA  | GLU | 182 | -0.070-111.546 | 3.366  | 1.00 | 0.00 |
| C    |       |     |     |     |                |        |      |      |
| ATOM | 10897 | CB  | GLU | 182 | -1.284-110.692 | 3.824  | 1.00 | 0.00 |
| C    |       |     |     |     |                |        |      |      |
| ATOM | 10898 | CG  | GLU | 182 | -2.336-111.592 | 4.628  | 1.00 | 0.00 |
| C    |       |     |     |     |                |        |      |      |

|      |       |     |     |     |                |        |      |      |
|------|-------|-----|-----|-----|----------------|--------|------|------|
| ATOM | 10899 | CD  | GLU | 182 | -3.771-111.164 | 4.440  | 1.00 | 0.00 |
| C    |       |     |     |     |                |        |      |      |
| ATOM | 10900 | OE1 | GLU | 182 | -4.512-110.959 | 5.445  | 1.00 | 0.00 |
| O    |       |     |     |     |                |        |      |      |
| ATOM | 10901 | OE2 | GLU | 182 | -4.223-111.008 | 3.263  | 1.00 | 0.00 |
| O1-  |       |     |     |     |                |        |      |      |
| ATOM | 10902 | C   | GLU | 182 | 0.931-110.869  | 2.504  | 1.00 | 0.00 |
| C    |       |     |     |     |                |        |      |      |
| ATOM | 10903 | O   | GLU | 182 | 0.633-109.829  | 1.959  | 1.00 | 0.00 |
| O    |       |     |     |     |                |        |      |      |
| ATOM | 10904 | N   | GLY | 183 | 2.166-111.425  | 2.360  | 1.00 | 0.00 |
| N    |       |     |     |     |                |        |      |      |
| ATOM | 10905 | CA  | GLY | 183 | 3.214-110.759  | 1.589  | 1.00 | 0.00 |
| C    |       |     |     |     |                |        |      |      |
| ATOM | 10906 | C   | GLY | 183 | 4.072-109.691  | 2.337  | 1.00 | 0.00 |
| C    |       |     |     |     |                |        |      |      |
| ATOM | 10907 | O   | GLY | 183 | 4.897-109.057  | 1.786  | 1.00 | 0.00 |
| O    |       |     |     |     |                |        |      |      |
| ATOM | 10908 | N   | LYS | 184 | 3.721-109.442  | 3.582  | 1.00 | 0.00 |
| N    |       |     |     |     |                |        |      |      |
| ATOM | 10909 | CA  | LYS | 184 | 4.320-108.347  | 4.414  | 1.00 | 0.00 |
| C    |       |     |     |     |                |        |      |      |
| ATOM | 10910 | CB  | LYS | 184 | 3.284-107.142  | 4.420  | 1.00 | 0.00 |
| C    |       |     |     |     |                |        |      |      |
| ATOM | 10911 | CG  | LYS | 184 | 3.151-106.395  | 3.092  | 1.00 | 0.00 |
| C    |       |     |     |     |                |        |      |      |
| ATOM | 10912 | CD  | LYS | 184 | 4.346-105.478  | 2.742  | 1.00 | 0.00 |
| C    |       |     |     |     |                |        |      |      |
| ATOM | 10913 | CE  | LYS | 184 | 3.946-105.046  | 1.368  | 1.00 | 0.00 |
| C    |       |     |     |     |                |        |      |      |
| ATOM | 10914 | NZ  | LYS | 184 | 4.898-104.049  | 0.864  | 1.00 | 0.00 |
| N1+  |       |     |     |     |                |        |      |      |
| ATOM | 10915 | C   | LYS | 184 | 4.731-108.728  | 5.831  | 1.00 | 0.00 |
| C    |       |     |     |     |                |        |      |      |
| ATOM | 10916 | O   | LYS | 184 | 4.175-109.665  | 6.390  | 1.00 | 0.00 |
| O    |       |     |     |     |                |        |      |      |
| ATOM | 10917 | N   | THR | 185 | 5.733-108.051  | 6.424  | 1.00 | 0.00 |
| N    |       |     |     |     |                |        |      |      |
| ATOM | 10918 | CA  | THR | 185 | 6.126-108.294  | 7.789  | 1.00 | 0.00 |
| C    |       |     |     |     |                |        |      |      |
| ATOM | 10919 | CB  | THR | 185 | 7.294-107.463  | 8.286  | 1.00 | 0.00 |
| C    |       |     |     |     |                |        |      |      |
| ATOM | 10920 | CG2 | THR | 185 | 7.878-107.940  | 9.625  | 1.00 | 0.00 |
| C    |       |     |     |     |                |        |      |      |
| ATOM | 10921 | OG1 | THR | 185 | 8.300-107.543  | 7.315  | 1.00 | 0.00 |
| O    |       |     |     |     |                |        |      |      |
| ATOM | 10922 | C   | THR | 185 | 4.963-107.899  | 8.744  | 1.00 | 0.00 |
| C    |       |     |     |     |                |        |      |      |
| ATOM | 10923 | O   | THR | 185 | 4.448-106.808  | 8.714  | 1.00 | 0.00 |
| O    |       |     |     |     |                |        |      |      |
| ATOM | 10924 | N   | ILE | 186 | 4.654-108.795  | 9.687  | 1.00 | 0.00 |
| N    |       |     |     |     |                |        |      |      |
| ATOM | 10925 | CA  | ILE | 186 | 3.645-108.682  | 10.775 | 1.00 | 0.00 |
| C    |       |     |     |     |                |        |      |      |



|      |       |     |     |     |                |        |      |      |
|------|-------|-----|-----|-----|----------------|--------|------|------|
| ATOM | 10926 | CB  | ILE | 186 | 2.439-109.675  | 10.584 | 1.00 | 0.00 |
| C    |       |     |     |     |                |        |      |      |
| ATOM | 10927 | CG2 | ILE | 186 | 2.965-111.096  | 10.591 | 1.00 | 0.00 |
| C    |       |     |     |     |                |        |      |      |
| ATOM | 10928 | CG1 | ILE | 186 | 1.223-109.468  | 11.552 | 1.00 | 0.00 |
| C    |       |     |     |     |                |        |      |      |
| ATOM | 10929 | CD1 | ILE | 186 | -0.018-110.329 | 11.205 | 1.00 | 0.00 |
| C    |       |     |     |     |                |        |      |      |
| ATOM | 10930 | C   | ILE | 186 | 4.289-108.812  | 12.190 | 1.00 | 0.00 |
| C    |       |     |     |     |                |        |      |      |
| ATOM | 10931 | O   | ILE | 186 | 3.633-108.383  | 13.209 | 1.00 | 0.00 |
| O    |       |     |     |     |                |        |      |      |
| ATOM | 10932 | N   | ALA | 187 | 5.438-109.392  | 12.367 | 1.00 | 0.00 |
| N    |       |     |     |     |                |        |      |      |
| ATOM | 10933 | CA  | ALA | 187 | 6.241-109.330  | 13.617 | 1.00 | 0.00 |
| C    |       |     |     |     |                |        |      |      |
| ATOM | 10934 | CB  | ALA | 187 | 5.655-110.243  | 14.788 | 1.00 | 0.00 |
| C    |       |     |     |     |                |        |      |      |
| ATOM | 10935 | C   | ALA | 187 | 7.781-109.502  | 13.393 | 1.00 | 0.00 |
| C    |       |     |     |     |                |        |      |      |
| ATOM | 10936 | O   | ALA | 187 | 8.215-109.988  | 12.373 | 1.00 | 0.00 |
| O    |       |     |     |     |                |        |      |      |
| ATOM | 10937 | N   | ILE | 188 | 8.575-109.238  | 14.427 | 1.00 | 0.00 |
| N    |       |     |     |     |                |        |      |      |
| ATOM | 10938 | CA  | ILE | 188 | 9.989-109.736  | 14.518 | 1.00 | 0.00 |
| C    |       |     |     |     |                |        |      |      |
| ATOM | 10939 | CB  | ILE | 188 | 10.932-108.514 | 14.387 | 1.00 | 0.00 |
| C    |       |     |     |     |                |        |      |      |
| ATOM | 10940 | CG2 | ILE | 188 | 12.345-108.755 | 14.920 | 1.00 | 0.00 |
| C    |       |     |     |     |                |        |      |      |
| ATOM | 10941 | CG1 | ILE | 188 | 10.945-108.066 | 12.901 | 1.00 | 0.00 |
| C    |       |     |     |     |                |        |      |      |
| ATOM | 10942 | CD1 | ILE | 188 | 11.605-106.721 | 12.645 | 1.00 | 0.00 |
| C    |       |     |     |     |                |        |      |      |
| ATOM | 10943 | C   | ILE | 188 | 10.112-110.622 | 15.749 | 1.00 | 0.00 |
| C    |       |     |     |     |                |        |      |      |
| ATOM | 10944 | O   | ILE | 188 | 9.306-110.450  | 16.611 | 1.00 | 0.00 |
| O    |       |     |     |     |                |        |      |      |
| ATOM | 10945 | N   | GLY | 189 | 11.179-111.403 | 15.924 | 1.00 | 0.00 |
| N    |       |     |     |     |                |        |      |      |
| ATOM | 10946 | CA  | GLY | 189 | 11.619-111.743 | 17.277 | 1.00 | 0.00 |
| C    |       |     |     |     |                |        |      |      |
| ATOM | 10947 | C   | GLY | 189 | 13.119-112.248 | 17.437 | 1.00 | 0.00 |
| C    |       |     |     |     |                |        |      |      |
| ATOM | 10948 | O   | GLY | 189 | 13.893-112.077 | 16.515 | 1.00 | 0.00 |
| O    |       |     |     |     |                |        |      |      |
| ATOM | 10949 | N   | LYS | 190 | 13.310-112.932 | 18.570 | 1.00 | 0.00 |
| N    |       |     |     |     |                |        |      |      |
| ATOM | 10950 | CA  | LYS | 190 | 14.549-113.590 | 18.973 | 1.00 | 0.00 |
| C    |       |     |     |     |                |        |      |      |
| ATOM | 10951 | CB  | LYS | 190 | 15.520-112.653 | 19.683 | 1.00 | 0.00 |
| C    |       |     |     |     |                |        |      |      |
| ATOM | 10952 | CG  | LYS | 190 | 14.860-111.695 | 20.669 | 1.00 | 0.00 |
| C    |       |     |     |     |                |        |      |      |

|      |       |     |     |     |                |        |      |      |
|------|-------|-----|-----|-----|----------------|--------|------|------|
| ATOM | 10953 | CD  | LYS | 190 | 15.900-110.904 | 21.457 | 1.00 | 0.00 |
| C    |       |     |     |     |                |        |      |      |
| ATOM | 10954 | CE  | LYS | 190 | 15.203-109.931 | 22.384 | 1.00 | 0.00 |
| C    |       |     |     |     |                |        |      |      |
| ATOM | 10955 | NZ  | LYS | 190 | 16.182-109.267 | 23.264 | 1.00 | 0.00 |
| N1+  |       |     |     |     |                |        |      |      |
| ATOM | 10956 | C   | LYS | 190 | 14.272-114.877 | 19.768 | 1.00 | 0.00 |
| C    |       |     |     |     |                |        |      |      |
| ATOM | 10957 | O   | LYS | 190 | 13.546-114.869 | 20.791 | 1.00 | 0.00 |
| O    |       |     |     |     |                |        |      |      |
| ATOM | 10958 | N   | VAL | 191 | 14.901-115.967 | 19.288 | 1.00 | 0.00 |
| N    |       |     |     |     |                |        |      |      |
| ATOM | 10959 | CA  | VAL | 191 | 14.777-117.329 | 19.845 | 1.00 | 0.00 |
| C    |       |     |     |     |                |        |      |      |
| ATOM | 10960 | CB  | VAL | 191 | 15.198-118.477 | 18.889 | 1.00 | 0.00 |
| C    |       |     |     |     |                |        |      |      |
| ATOM | 10961 | CG1 | VAL | 191 | 15.164-119.899 | 19.476 | 1.00 | 0.00 |
| C    |       |     |     |     |                |        |      |      |
| ATOM | 10962 | CG2 | VAL | 191 | 14.380-118.546 | 17.611 | 1.00 | 0.00 |
| C    |       |     |     |     |                |        |      |      |
| ATOM | 10963 | C   | VAL | 191 | 15.447-117.472 | 21.167 | 1.00 | 0.00 |
| C    |       |     |     |     |                |        |      |      |
| ATOM | 10964 | O   | VAL | 191 | 16.624-117.315 | 21.293 | 1.00 | 0.00 |
| O    |       |     |     |     |                |        |      |      |
| ATOM | 10965 | N   | LEU | 192 | 14.644-117.819 | 22.175 | 1.00 | 0.00 |
| N    |       |     |     |     |                |        |      |      |
| ATOM | 10966 | CA  | LEU | 192 | 15.006-118.084 | 23.578 | 1.00 | 0.00 |
| C    |       |     |     |     |                |        |      |      |
| ATOM | 10967 | CB  | LEU | 192 | 13.799-118.039 | 24.526 | 1.00 | 0.00 |
| C    |       |     |     |     |                |        |      |      |
| ATOM | 10968 | CG  | LEU | 192 | 13.242-116.628 | 24.809 | 1.00 | 0.00 |
| C    |       |     |     |     |                |        |      |      |
| ATOM | 10969 | CD1 | LEU | 192 | 11.928-116.741 | 25.588 | 1.00 | 0.00 |
| C    |       |     |     |     |                |        |      |      |
| ATOM | 10970 | CD2 | LEU | 192 | 14.223-115.763 | 25.607 | 1.00 | 0.00 |
| C    |       |     |     |     |                |        |      |      |
| ATOM | 10971 | C   | LEU | 192 | 15.688-119.432 | 23.723 | 1.00 | 0.00 |
| C    |       |     |     |     |                |        |      |      |
| ATOM | 10972 | O   | LEU | 192 | 16.796-119.381 | 24.260 | 1.00 | 0.00 |
| O    |       |     |     |     |                |        |      |      |
| ATOM | 10973 | N   | LYS | 193 | 14.987-120.496 | 23.307 | 1.00 | 0.00 |
| N    |       |     |     |     |                |        |      |      |
| ATOM | 10974 | CA  | LYS | 193 | 15.407-121.859 | 23.444 | 1.00 | 0.00 |
| C    |       |     |     |     |                |        |      |      |
| ATOM | 10975 | CB  | LYS | 193 | 15.371-122.448 | 24.902 | 1.00 | 0.00 |
| C    |       |     |     |     |                |        |      |      |
| ATOM | 10976 | CG  | LYS | 193 | 14.078-122.703 | 25.507 | 1.00 | 0.00 |
| C    |       |     |     |     |                |        |      |      |
| ATOM | 10977 | CD  | LYS | 193 | 14.334-123.328 | 26.889 | 1.00 | 0.00 |
| C    |       |     |     |     |                |        |      |      |
| ATOM | 10978 | CE  | LYS | 193 | 14.616-124.806 | 27.013 | 1.00 | 0.00 |
| C    |       |     |     |     |                |        |      |      |
| ATOM | 10979 | NZ  | LYS | 193 | 13.544-125.648 | 26.329 | 1.00 | 0.00 |
| N1+  |       |     |     |     |                |        |      |      |

|      |       |     |     |     |                |        |      |      |
|------|-------|-----|-----|-----|----------------|--------|------|------|
| ATOM | 10980 | C   | LYS | 193 | 14.538-122.753 | 22.548 | 1.00 | 0.00 |
| C    |       |     |     |     |                |        |      |      |
| ATOM | 10981 | O   | LYS | 193 | 13.458-122.367 | 22.162 | 1.00 | 0.00 |
| O    |       |     |     |     |                |        |      |      |
| ATOM | 10982 | N   | LEU | 194 | 14.964-123.986 | 22.230 | 1.00 | 0.00 |
| N    |       |     |     |     |                |        |      |      |
| ATOM | 10983 | CA  | LEU | 194 | 14.165-125.018 | 21.545 | 1.00 | 0.00 |
| C    |       |     |     |     |                |        |      |      |
| ATOM | 10984 | CB  | LEU | 194 | 15.100-125.879 | 20.669 | 1.00 | 0.00 |
| C    |       |     |     |     |                |        |      |      |
| ATOM | 10985 | CG  | LEU | 194 | 15.746-125.252 | 19.399 | 1.00 | 0.00 |
| C    |       |     |     |     |                |        |      |      |
| ATOM | 10986 | CD1 | LEU | 194 | 16.499-123.903 | 19.682 | 1.00 | 0.00 |
| C    |       |     |     |     |                |        |      |      |
| ATOM | 10987 | CD2 | LEU | 194 | 16.656-126.187 | 18.624 | 1.00 | 0.00 |
| C    |       |     |     |     |                |        |      |      |
| ATOM | 10988 | C   | LEU | 194 | 13.336-125.866 | 22.501 | 1.00 | 0.00 |
| C    |       |     |     |     |                |        |      |      |
| ATOM | 10989 | O   | LEU | 194 | 13.646-125.958 | 23.663 | 1.00 | 0.00 |
| O    |       |     |     |     |                |        |      |      |
| ATOM | 10990 | N   | VAL | 195 | 12.244-126.419 | 22.009 | 1.00 | 0.00 |
| N    |       |     |     |     |                |        |      |      |
| ATOM | 10991 | CA  | VAL | 195 | 11.339-127.265 | 22.734 | 1.00 | 0.00 |
| C    |       |     |     |     |                |        |      |      |
| ATOM | 10992 | CB  | VAL | 195 | 9.947-126.626  | 22.584 | 1.00 | 0.00 |
| C    |       |     |     |     |                |        |      |      |
| ATOM | 10993 | CG1 | VAL | 195 | 8.781-127.484  | 23.115 | 1.00 | 0.00 |
| C    |       |     |     |     |                |        |      |      |
| ATOM | 10994 | CG2 | VAL | 195 | 9.787-125.318  | 23.289 | 1.00 | 0.00 |
| C    |       |     |     |     |                |        |      |      |
| ATOM | 10995 | C   | VAL | 195 | 11.387-128.640 | 22.222 | 1.00 | 0.00 |
| C    |       |     |     |     |                |        |      |      |
| ATOM | 10996 | O   | VAL | 195 | 11.166-128.940 | 21.050 | 1.00 | 0.00 |
| O    |       |     |     |     |                |        |      |      |
| ATOM | 10997 | N   | PRO | 196 | 11.511-129.635 | 23.089 | 1.00 | 0.00 |
| N    |       |     |     |     |                |        |      |      |
| ATOM | 10998 | CD  | PRO | 196 | 10.980-130.986 | 22.763 | 1.00 | 0.00 |
| C    |       |     |     |     |                |        |      |      |
| ATOM | 10999 | CG  | PRO | 196 | 10.707-131.561 | 24.149 | 1.00 | 0.00 |
| C    |       |     |     |     |                |        |      |      |
| ATOM | 11000 | CB  | PRO | 196 | 11.801-130.971 | 25.080 | 1.00 | 0.00 |
| C    |       |     |     |     |                |        |      |      |
| ATOM | 11001 | CA  | PRO | 196 | 11.876-129.605 | 24.515 | 1.00 | 0.00 |
| C    |       |     |     |     |                |        |      |      |
| ATOM | 11002 | C   | PRO | 196 | 13.261-129.036 | 24.872 | 1.00 | 0.00 |
| C    |       |     |     |     |                |        |      |      |
| ATOM | 11003 | O   | PRO | 196 | 14.180-129.181 | 23.978 | 1.00 | 0.00 |
| O    |       |     |     |     |                |        |      |      |
| ATOM | 11004 | OXT | PRO | 196 | 13.522-128.601 | 26.044 | 1.00 | 0.00 |
| O1-  |       |     |     |     |                |        |      |      |
| ATOM | 11005 | CH3 | ACE | 197 | 29.888-111.250 | 43.384 | 1.00 | 0.00 |
| C    |       |     |     |     |                |        |      |      |
| ATOM | 11006 | C   | ACE | 197 | 29.312-109.969 | 42.816 | 1.00 | 0.00 |
| C    |       |     |     |     |                |        |      |      |

|      |       |     |     |     |                |        |      |      |
|------|-------|-----|-----|-----|----------------|--------|------|------|
| ATOM | 11007 | O   | ACE | 197 | 28.675-109.993 | 41.748 | 1.00 | 0.00 |
| O    |       |     |     |     |                |        |      |      |
| ATOM | 11008 | N   | ASN | 198 | 29.616-108.851 | 43.495 | 1.00 | 0.00 |
| N    |       |     |     |     |                |        |      |      |
| ATOM | 11009 | CA  | ASN | 198 | 29.329-107.459 | 43.015 | 1.00 | 0.00 |
| C    |       |     |     |     |                |        |      |      |
| ATOM | 11010 | CB  | ASN | 198 | 29.394-106.453 | 44.189 | 1.00 | 0.00 |
| C    |       |     |     |     |                |        |      |      |
| ATOM | 11011 | CG  | ASN | 198 | 28.306-106.714 | 45.162 | 1.00 | 0.00 |
| C    |       |     |     |     |                |        |      |      |
| ATOM | 11012 | OD1 | ASN | 198 | 28.481-107.089 | 46.321 | 1.00 | 0.00 |
| O    |       |     |     |     |                |        |      |      |
| ATOM | 11013 | ND2 | ASN | 198 | 27.065-106.369 | 44.784 | 1.00 | 0.00 |
| N    |       |     |     |     |                |        |      |      |
| ATOM | 11014 | C   | ASN | 198 | 30.188-107.151 | 41.786 | 1.00 | 0.00 |
| C    |       |     |     |     |                |        |      |      |
| ATOM | 11015 | O   | ASN | 198 | 31.256-107.663 | 41.626 | 1.00 | 0.00 |
| O    |       |     |     |     |                |        |      |      |
| ATOM | 11016 | N   | PHE | 199 | 29.732-106.206 | 40.913 | 1.00 | 0.00 |
| N    |       |     |     |     |                |        |      |      |
| ATOM | 11017 | CA  | PHE | 199 | 30.484-105.733 | 39.795 | 1.00 | 0.00 |
| C    |       |     |     |     |                |        |      |      |
| ATOM | 11018 | CB  | PHE | 199 | 29.737-105.872 | 38.442 | 1.00 | 0.00 |
| C    |       |     |     |     |                |        |      |      |
| ATOM | 11019 | CG  | PHE | 199 | 29.229-107.252 | 37.944 | 1.00 | 0.00 |
| C    |       |     |     |     |                |        |      |      |
| ATOM | 11020 | CD1 | PHE | 199 | 28.157-107.927 | 38.502 | 1.00 | 0.00 |
| C    |       |     |     |     |                |        |      |      |
| ATOM | 11021 | CE1 | PHE | 199 | 27.799-109.214 | 38.120 | 1.00 | 0.00 |
| C    |       |     |     |     |                |        |      |      |
| ATOM | 11022 | CZ  | PHE | 199 | 28.460-109.832 | 37.090 | 1.00 | 0.00 |
| C    |       |     |     |     |                |        |      |      |
| ATOM | 11023 | CE2 | PHE | 199 | 29.535-109.175 | 36.491 | 1.00 | 0.00 |
| C    |       |     |     |     |                |        |      |      |
| ATOM | 11024 | CD2 | PHE | 199 | 29.963-107.906 | 36.919 | 1.00 | 0.00 |
| C    |       |     |     |     |                |        |      |      |
| ATOM | 11025 | C   | PHE | 199 | 30.825-104.246 | 39.969 | 1.00 | 0.00 |
| C    |       |     |     |     |                |        |      |      |
| ATOM | 11026 | O   | PHE | 199 | 30.252-103.641 | 40.844 | 1.00 | 0.00 |
| O    |       |     |     |     |                |        |      |      |
| ATOM | 11027 | N   | ASP | 200 | 31.753-103.623 | 39.227 | 1.00 | 0.00 |
| N    |       |     |     |     |                |        |      |      |
| ATOM | 11028 | CA  | ASP | 200 | 32.157-102.223 | 39.401 | 1.00 | 0.00 |
| C    |       |     |     |     |                |        |      |      |
| ATOM | 11029 | CB  | ASP | 200 | 33.237-101.998 | 38.272 | 1.00 | 0.00 |
| C    |       |     |     |     |                |        |      |      |
| ATOM | 11030 | CG  | ASP | 200 | 33.802-100.564 | 38.334 | 1.00 | 0.00 |
| C    |       |     |     |     |                |        |      |      |
| ATOM | 11031 | OD1 | ASP | 200 | 34.335-100.040 | 37.336 | 1.00 | 0.00 |
| O    |       |     |     |     |                |        |      |      |
| ATOM | 11032 | OD2 | ASP | 200 | 33.739-100.040 | 39.435 | 1.00 | 0.00 |
| O1-  |       |     |     |     |                |        |      |      |
| ATOM | 11033 | C   | ASP | 200 | 30.970-101.244 | 39.405 | 1.00 | 0.00 |
| C    |       |     |     |     |                |        |      |      |

|      |       |     |     |     |                |        |      |      |
|------|-------|-----|-----|-----|----------------|--------|------|------|
| ATOM | 11034 | O   | ASP | 200 | 30.187-101.208 | 38.470 | 1.00 | 0.00 |
| O    |       |     |     |     |                |        |      |      |
| ATOM | 11035 | N   | THR | 201 | 30.948-100.376 | 40.377 | 1.00 | 0.00 |
| N    |       |     |     |     |                |        |      |      |
| ATOM | 11036 | CA  | THR | 201 | 29.956 -99.233 | 40.496 | 1.00 | 0.00 |
| C    |       |     |     |     |                |        |      |      |
| ATOM | 11037 | CB  | THR | 201 | 30.170 -98.545 | 41.791 | 1.00 | 0.00 |
| C    |       |     |     |     |                |        |      |      |
| ATOM | 11038 | CG2 | THR | 201 | 29.948 -99.537 | 42.943 | 1.00 | 0.00 |
| C    |       |     |     |     |                |        |      |      |
| ATOM | 11039 | OG1 | THR | 201 | 31.470 -98.056 | 41.957 | 1.00 | 0.00 |
| O    |       |     |     |     |                |        |      |      |
| ATOM | 11040 | C   | THR | 201 | 30.054 -98.101 | 39.463 | 1.00 | 0.00 |
| C    |       |     |     |     |                |        |      |      |
| ATOM | 11041 | O   | THR | 201 | 29.100 -97.236 | 39.298 | 1.00 | 0.00 |
| O    |       |     |     |     |                |        |      |      |
| ATOM | 11042 | N   | SER | 202 | 31.108 -98.061 | 38.644 | 1.00 | 0.00 |
| N    |       |     |     |     |                |        |      |      |
| ATOM | 11043 | CA  | SER | 202 | 31.285 -97.105 | 37.473 | 1.00 | 0.00 |
| C    |       |     |     |     |                |        |      |      |
| ATOM | 11044 | CB  | SER | 202 | 32.795 -97.028 | 37.078 | 1.00 | 0.00 |
| C    |       |     |     |     |                |        |      |      |
| ATOM | 11045 | OG  | SER | 202 | 33.134 -98.068 | 36.243 | 1.00 | 0.00 |
| O    |       |     |     |     |                |        |      |      |
| ATOM | 11046 | C   | SER | 202 | 30.371 -97.591 | 36.324 | 1.00 | 0.00 |
| C    |       |     |     |     |                |        |      |      |
| ATOM | 11047 | O   | SER | 202 | 30.021 -96.840 | 35.424 | 1.00 | 0.00 |
| O    |       |     |     |     |                |        |      |      |
| ATOM | 11048 | N   | LEU | 203 | 29.893 -98.839 | 36.355 | 1.00 | 0.00 |
| N    |       |     |     |     |                |        |      |      |
| ATOM | 11049 | CA  | LEU | 203 | 29.046 -99.395 | 35.251 | 1.00 | 0.00 |
| C    |       |     |     |     |                |        |      |      |
| ATOM | 11050 | CB  | LEU | 203 | 28.957-100.964 | 35.404 | 1.00 | 0.00 |
| C    |       |     |     |     |                |        |      |      |
| ATOM | 11051 | CG  | LEU | 203 | 30.328-101.712 | 35.450 | 1.00 | 0.00 |
| C    |       |     |     |     |                |        |      |      |
| ATOM | 11052 | CD1 | LEU | 203 | 30.015-103.203 | 35.414 | 1.00 | 0.00 |
| C    |       |     |     |     |                |        |      |      |
| ATOM | 11053 | CD2 | LEU | 203 | 31.078-101.495 | 34.136 | 1.00 | 0.00 |
| C    |       |     |     |     |                |        |      |      |
| ATOM | 11054 | C   | LEU | 203 | 27.681 -98.709 | 35.147 | 1.00 | 0.00 |
| C    |       |     |     |     |                |        |      |      |
| ATOM | 11055 | O   | LEU | 203 | 27.434 -98.280 | 34.026 | 1.00 | 0.00 |
| O    |       |     |     |     |                |        |      |      |
| ATOM | 11056 | N   | PRO | 204 | 26.788 -98.555 | 36.171 | 1.00 | 0.00 |
| N    |       |     |     |     |                |        |      |      |
| ATOM | 11057 | CD  | PRO | 204 | 26.902 -99.103 | 37.489 | 1.00 | 0.00 |
| C    |       |     |     |     |                |        |      |      |
| ATOM | 11058 | CG  | PRO | 204 | 25.472 -99.290 | 37.918 | 1.00 | 0.00 |
| C    |       |     |     |     |                |        |      |      |
| ATOM | 11059 | CB  | PRO | 204 | 24.741 -98.115 | 37.266 | 1.00 | 0.00 |
| C    |       |     |     |     |                |        |      |      |
| ATOM | 11060 | CA  | PRO | 204 | 25.565 -97.801 | 36.013 | 1.00 | 0.00 |
| C    |       |     |     |     |                |        |      |      |

|      |       |     |     |     |        |         |        |      |      |
|------|-------|-----|-----|-----|--------|---------|--------|------|------|
| ATOM | 11061 | C   | PRO | 204 | 25.810 | -96.277 | 35.886 | 1.00 | 0.00 |
| C    |       |     |     |     |        |         |        |      |      |
| ATOM | 11062 | O   | PRO | 204 | 24.956 | -95.666 | 35.256 | 1.00 | 0.00 |
| O    |       |     |     |     |        |         |        |      |      |
| ATOM | 11063 | N   | THR | 205 | 26.996 | -95.689 | 36.190 | 1.00 | 0.00 |
| N    |       |     |     |     |        |         |        |      |      |
| ATOM | 11064 | CA  | THR | 205 | 27.276 | -94.228 | 35.889 | 1.00 | 0.00 |
| C    |       |     |     |     |        |         |        |      |      |
| ATOM | 11065 | CB  | THR | 205 | 28.399 | -93.586 | 36.750 | 1.00 | 0.00 |
| C    |       |     |     |     |        |         |        |      |      |
| ATOM | 11066 | CG2 | THR | 205 | 28.778 | -92.119 | 36.447 | 1.00 | 0.00 |
| C    |       |     |     |     |        |         |        |      |      |
| ATOM | 11067 | OG1 | THR | 205 | 27.959 | -93.569 | 38.139 | 1.00 | 0.00 |
| O    |       |     |     |     |        |         |        |      |      |
| ATOM | 11068 | C   | THR | 205 | 27.593 | -94.045 | 34.425 | 1.00 | 0.00 |
| C    |       |     |     |     |        |         |        |      |      |
| ATOM | 11069 | O   | THR | 205 | 27.245 | -92.999 | 33.878 | 1.00 | 0.00 |
| O    |       |     |     |     |        |         |        |      |      |
| ATOM | 11070 | N   | SER | 206 | 28.432 | -94.963 | 33.849 | 1.00 | 0.00 |
| N    |       |     |     |     |        |         |        |      |      |
| ATOM | 11071 | CA  | SER | 206 | 28.775 | -94.982 | 32.429 | 1.00 | 0.00 |
| C    |       |     |     |     |        |         |        |      |      |
| ATOM | 11072 | CB  | SER | 206 | 30.065 | -95.857 | 32.194 | 1.00 | 0.00 |
| C    |       |     |     |     |        |         |        |      |      |
| ATOM | 11073 | OG  | SER | 206 | 29.840 | -97.165 | 32.698 | 1.00 | 0.00 |
| O    |       |     |     |     |        |         |        |      |      |
| ATOM | 11074 | C   | SER | 206 | 27.607 | -95.484 | 31.502 | 1.00 | 0.00 |
| C    |       |     |     |     |        |         |        |      |      |
| ATOM | 11075 | O   | SER | 206 | 27.763 | -95.569 | 30.264 | 1.00 | 0.00 |
| O    |       |     |     |     |        |         |        |      |      |
| ATOM | 11076 | N   | HIE | 207 | 26.458 | -95.924 | 32.089 | 1.00 | 0.00 |
| N    |       |     |     |     |        |         |        |      |      |
| ATOM | 11077 | CA  | HIE | 207 | 25.359 | -96.621 | 31.368 | 1.00 | 0.00 |
| C    |       |     |     |     |        |         |        |      |      |
| ATOM | 11078 | CB  | HIE | 207 | 24.466 | -95.588 | 30.684 | 1.00 | 0.00 |
| C    |       |     |     |     |        |         |        |      |      |
| ATOM | 11079 | CG  | HIE | 207 | 23.887 | -94.602 | 31.555 | 1.00 | 0.00 |
| C    |       |     |     |     |        |         |        |      |      |
| ATOM | 11080 | ND1 | HIE | 207 | 23.087 | -94.847 | 32.724 | 1.00 | 0.00 |
| N    |       |     |     |     |        |         |        |      |      |
| ATOM | 11081 | CE1 | HIE | 207 | 22.917 | -93.649 | 33.296 | 1.00 | 0.00 |
| C    |       |     |     |     |        |         |        |      |      |
| ATOM | 11082 | NE2 | HIE | 207 | 23.565 | -92.672 | 32.598 | 1.00 | 0.00 |
| N    |       |     |     |     |        |         |        |      |      |
| ATOM | 11083 | CD2 | HIE | 207 | 24.150 | -93.273 | 31.508 | 1.00 | 0.00 |
| C    |       |     |     |     |        |         |        |      |      |
| ATOM | 11084 | C   | HIE | 207 | 25.760 | -97.840 | 30.640 | 1.00 | 0.00 |
| C    |       |     |     |     |        |         |        |      |      |
| ATOM | 11085 | O   | HIE | 207 | 25.324 | -97.936 | 29.474 | 1.00 | 0.00 |
| O    |       |     |     |     |        |         |        |      |      |
| ATOM | 11086 | N   | THR | 208 | 26.621 | -98.714 | 31.284 | 1.00 | 0.00 |
| N    |       |     |     |     |        |         |        |      |      |
| ATOM | 11087 | CA  | THR | 208 | 27.169 | -99.948 | 30.689 | 1.00 | 0.00 |
| C    |       |     |     |     |        |         |        |      |      |

|      |       |     |     |     |                |        |      |      |
|------|-------|-----|-----|-----|----------------|--------|------|------|
| ATOM | 11088 | CB  | THR | 208 | 28.383-100.447 | 31.539 | 1.00 | 0.00 |
| C    |       |     |     |     |                |        |      |      |
| ATOM | 11089 | CG2 | THR | 208 | 28.907-101.829 | 31.000 | 1.00 | 0.00 |
| C    |       |     |     |     |                |        |      |      |
| ATOM | 11090 | OG1 | THR | 208 | 29.363 -99.475 | 31.274 | 1.00 | 0.00 |
| O    |       |     |     |     |                |        |      |      |
| ATOM | 11091 | C   | THR | 208 | 26.088-100.955 | 30.456 | 1.00 | 0.00 |
| C    |       |     |     |     |                |        |      |      |
| ATOM | 11092 | O   | THR | 208 | 26.202-101.850 | 29.568 | 1.00 | 0.00 |
| O    |       |     |     |     |                |        |      |      |
| ATOM | 11093 | N   | TYR | 209 | 24.881-100.785 | 30.954 | 1.00 | 0.00 |
| N    |       |     |     |     |                |        |      |      |
| ATOM | 11094 | CA  | TYR | 209 | 23.762-101.569 | 30.503 | 1.00 | 0.00 |
| C    |       |     |     |     |                |        |      |      |
| ATOM | 11095 | CB  | TYR | 209 | 22.510-101.303 | 31.355 | 1.00 | 0.00 |
| C    |       |     |     |     |                |        |      |      |
| ATOM | 11096 | CG  | TYR | 209 | 22.049 -99.859 | 31.379 | 1.00 | 0.00 |
| C    |       |     |     |     |                |        |      |      |
| ATOM | 11097 | CD1 | TYR | 209 | 22.490 -98.988 | 32.388 | 1.00 | 0.00 |
| C    |       |     |     |     |                |        |      |      |
| ATOM | 11098 | CE1 | TYR | 209 | 22.022 -97.675 | 32.451 | 1.00 | 0.00 |
| C    |       |     |     |     |                |        |      |      |
| ATOM | 11099 | CZ  | TYR | 209 | 21.107 -97.228 | 31.502 | 1.00 | 0.00 |
| C    |       |     |     |     |                |        |      |      |
| ATOM | 11100 | OH  | TYR | 209 | 20.587 -95.967 | 31.569 | 1.00 | 0.00 |
| O    |       |     |     |     |                |        |      |      |
| ATOM | 11101 | CE2 | TYR | 209 | 20.681 -98.067 | 30.476 | 1.00 | 0.00 |
| C    |       |     |     |     |                |        |      |      |
| ATOM | 11102 | CD2 | TYR | 209 | 21.155 -99.379 | 30.412 | 1.00 | 0.00 |
| C    |       |     |     |     |                |        |      |      |
| ATOM | 11103 | C   | TYR | 209 | 23.399-101.356 | 29.007 | 1.00 | 0.00 |
| C    |       |     |     |     |                |        |      |      |
| ATOM | 11104 | O   | TYR | 209 | 22.775-102.249 | 28.401 | 1.00 | 0.00 |
| O    |       |     |     |     |                |        |      |      |
| ATOM | 11105 | N   | LEU | 210 | 23.695-100.202 | 28.340 | 1.00 | 0.00 |
| N    |       |     |     |     |                |        |      |      |
| ATOM | 11106 | CA  | LEU | 210 | 23.498-100.059 | 26.883 | 1.00 | 0.00 |
| C    |       |     |     |     |                |        |      |      |
| ATOM | 11107 | CB  | LEU | 210 | 23.302 -98.556 | 26.512 | 1.00 | 0.00 |
| C    |       |     |     |     |                |        |      |      |
| ATOM | 11108 | CG  | LEU | 210 | 22.413 -97.710 | 27.422 | 1.00 | 0.00 |
| C    |       |     |     |     |                |        |      |      |
| ATOM | 11109 | CD1 | LEU | 210 | 22.623 -96.208 | 27.246 | 1.00 | 0.00 |
| C    |       |     |     |     |                |        |      |      |
| ATOM | 11110 | CD2 | LEU | 210 | 20.921 -97.934 | 27.179 | 1.00 | 0.00 |
| C    |       |     |     |     |                |        |      |      |
| ATOM | 11111 | C   | LEU | 210 | 24.628-100.592 | 26.026 | 1.00 | 0.00 |
| C    |       |     |     |     |                |        |      |      |
| ATOM | 11112 | O   | LEU | 210 | 24.521-100.585 | 24.790 | 1.00 | 0.00 |
| O    |       |     |     |     |                |        |      |      |
| ATOM | 11113 | N   | GLY | 211 | 25.601-101.284 | 26.667 | 1.00 | 0.00 |
| N    |       |     |     |     |                |        |      |      |
| ATOM | 11114 | CA  | GLY | 211 | 26.969-101.457 | 26.279 | 1.00 | 0.00 |
| C    |       |     |     |     |                |        |      |      |

|      |       |     |     |     |        |          |        |      |      |
|------|-------|-----|-----|-----|--------|----------|--------|------|------|
| ATOM | 11115 | C   | GLY | 211 | 27.888 | -100.163 | 26.386 | 1.00 | 0.00 |
| C    |       |     |     |     |        |          |        |      |      |
| ATOM | 11116 | O   | GLY | 211 | 27.437 | -99.056  | 26.670 | 1.00 | 0.00 |
| O    |       |     |     |     |        |          |        |      |      |
| ATOM | 11117 | N   | ALA | 212 | 29.206 | -100.374 | 25.970 | 1.00 | 0.00 |
| N    |       |     |     |     |        |          |        |      |      |
| ATOM | 11118 | CA  | ALA | 212 | 30.210 | -99.382  | 26.081 | 1.00 | 0.00 |
| C    |       |     |     |     |        |          |        |      |      |
| ATOM | 11119 | CB  | ALA | 212 | 31.005 | -99.714  | 27.352 | 1.00 | 0.00 |
| C    |       |     |     |     |        |          |        |      |      |
| ATOM | 11120 | C   | ALA | 212 | 31.026 | -99.166  | 24.777 | 1.00 | 0.00 |
| C    |       |     |     |     |        |          |        |      |      |
| ATOM | 11121 | O   | ALA | 212 | 31.514 | -98.084  | 24.547 | 1.00 | 0.00 |
| O    |       |     |     |     |        |          |        |      |      |
| ATOM | 11122 | N   | ASP | 213 | 31.166 | -100.091 | 23.858 | 1.00 | 0.00 |
| N    |       |     |     |     |        |          |        |      |      |
| ATOM | 11123 | CA  | ASP | 213 | 31.812 | -99.857  | 22.523 | 1.00 | 0.00 |
| C    |       |     |     |     |        |          |        |      |      |
| ATOM | 11124 | CB  | ASP | 213 | 32.189 | -101.309 | 22.059 | 1.00 | 0.00 |
| C    |       |     |     |     |        |          |        |      |      |
| ATOM | 11125 | CG  | ASP | 213 | 32.651 | -101.379 | 20.643 | 1.00 | 0.00 |
| C    |       |     |     |     |        |          |        |      |      |
| ATOM | 11126 | OD1 | ASP | 213 | 32.622 | -102.514 | 20.132 | 1.00 | 0.00 |
| O    |       |     |     |     |        |          |        |      |      |
| ATOM | 11127 | OD2 | ASP | 213 | 33.344 | -100.465 | 20.176 | 1.00 | 0.00 |
| O1-  |       |     |     |     |        |          |        |      |      |
| ATOM | 11128 | C   | ASP | 213 | 30.808 | -99.281  | 21.478 | 1.00 | 0.00 |
| C    |       |     |     |     |        |          |        |      |      |
| ATOM | 11129 | O   | ASP | 213 | 30.064 | -100.033 | 20.774 | 1.00 | 0.00 |
| O    |       |     |     |     |        |          |        |      |      |
| ATOM | 11130 | N   | MET | 214 | 30.659 | -97.909  | 21.526 | 1.00 | 0.00 |
| N    |       |     |     |     |        |          |        |      |      |
| ATOM | 11131 | CA  | MET | 214 | 29.914 | -97.178  | 20.520 | 1.00 | 0.00 |
| C    |       |     |     |     |        |          |        |      |      |
| ATOM | 11132 | CB  | MET | 214 | 28.850 | -96.331  | 21.367 | 1.00 | 0.00 |
| C    |       |     |     |     |        |          |        |      |      |
| ATOM | 11133 | CG  | MET | 214 | 27.991 | -97.073  | 22.371 | 1.00 | 0.00 |
| C    |       |     |     |     |        |          |        |      |      |
| ATOM | 11134 | SD  | MET | 214 | 26.443 | -96.193  | 22.809 | 1.00 | 0.00 |
| S    |       |     |     |     |        |          |        |      |      |
| ATOM | 11135 | CE  | MET | 214 | 25.358 | -97.605  | 23.249 | 1.00 | 0.00 |
| C    |       |     |     |     |        |          |        |      |      |
| ATOM | 11136 | C   | MET | 214 | 30.794 | -96.212  | 19.699 | 1.00 | 0.00 |
| C    |       |     |     |     |        |          |        |      |      |
| ATOM | 11137 | O   | MET | 214 | 31.978 | -96.053  | 19.962 | 1.00 | 0.00 |
| O    |       |     |     |     |        |          |        |      |      |
| ATOM | 11138 | N   | GLU | 215 | 30.219 | -95.526  | 18.748 | 1.00 | 0.00 |
| N    |       |     |     |     |        |          |        |      |      |
| ATOM | 11139 | CA  | GLU | 215 | 30.838 | -94.401  | 18.056 | 1.00 | 0.00 |
| C    |       |     |     |     |        |          |        |      |      |
| ATOM | 11140 | CB  | GLU | 215 | 29.805 | -94.043  | 16.900 | 1.00 | 0.00 |
| C    |       |     |     |     |        |          |        |      |      |
| ATOM | 11141 | CG  | GLU | 215 | 29.243 | -95.090  | 15.976 | 1.00 | 0.00 |
| C    |       |     |     |     |        |          |        |      |      |



|      |       |     |     |     |        |         |        |      |      |
|------|-------|-----|-----|-----|--------|---------|--------|------|------|
| ATOM | 11142 | CD  | GLU | 215 | 30.272 | -95.625 | 15.020 | 1.00 | 0.00 |
| C    |       |     |     |     |        |         |        |      |      |
| ATOM | 11143 | OE1 | GLU | 215 | 30.586 | -96.837 | 15.177 | 1.00 | 0.00 |
| O    |       |     |     |     |        |         |        |      |      |
| ATOM | 11144 | OE2 | GLU | 215 | 30.721 | -94.950 | 14.053 | 1.00 | 0.00 |
| O1-  |       |     |     |     |        |         |        |      |      |
| ATOM | 11145 | C   | GLU | 215 | 30.957 | -93.231 | 19.057 | 1.00 | 0.00 |
| C    |       |     |     |     |        |         |        |      |      |
| ATOM | 11146 | O   | GLU | 215 | 29.912 | -92.536 | 19.308 | 1.00 | 0.00 |
| O    |       |     |     |     |        |         |        |      |      |
| ATOM | 11147 | N   | GLU | 216 | 32.063 | -93.066 | 19.772 | 1.00 | 0.00 |
| N    |       |     |     |     |        |         |        |      |      |
| ATOM | 11148 | CA  | GLU | 216 | 32.272 | -91.966 | 20.835 | 1.00 | 0.00 |
| C    |       |     |     |     |        |         |        |      |      |
| ATOM | 11149 | CB  | GLU | 216 | 33.463 | -92.463 | 21.672 | 1.00 | 0.00 |
| C    |       |     |     |     |        |         |        |      |      |
| ATOM | 11150 | CG  | GLU | 216 | 33.676 | -91.717 | 22.980 | 1.00 | 0.00 |
| C    |       |     |     |     |        |         |        |      |      |
| ATOM | 11151 | CD  | GLU | 216 | 34.981 | -92.105 | 23.746 | 1.00 | 0.00 |
| C    |       |     |     |     |        |         |        |      |      |
| ATOM | 11152 | OE1 | GLU | 216 | 36.089 | -91.911 | 23.161 | 1.00 | 0.00 |
| O    |       |     |     |     |        |         |        |      |      |
| ATOM | 11153 | OE2 | GLU | 216 | 34.959 | -92.251 | 24.988 | 1.00 | 0.00 |
| O1-  |       |     |     |     |        |         |        |      |      |
| ATOM | 11154 | C   | GLU | 216 | 32.628 | -90.707 | 20.135 | 1.00 | 0.00 |
| C    |       |     |     |     |        |         |        |      |      |
| ATOM | 11155 | O   | GLU | 216 | 33.164 | -90.702 | 19.021 | 1.00 | 0.00 |
| O    |       |     |     |     |        |         |        |      |      |
| ATOM | 11156 | N   | PHE | 217 | 32.370 | -89.581 | 20.763 | 1.00 | 0.00 |
| N    |       |     |     |     |        |         |        |      |      |
| ATOM | 11157 | CA  | PHE | 217 | 32.694 | -88.184 | 20.328 | 1.00 | 0.00 |
| C    |       |     |     |     |        |         |        |      |      |
| ATOM | 11158 | CB  | PHE | 217 | 31.527 | -87.592 | 19.529 | 1.00 | 0.00 |
| C    |       |     |     |     |        |         |        |      |      |
| ATOM | 11159 | CG  | PHE | 217 | 31.002 | -88.393 | 18.375 | 1.00 | 0.00 |
| C    |       |     |     |     |        |         |        |      |      |
| ATOM | 11160 | CD1 | PHE | 217 | 31.729 | -88.538 | 17.169 | 1.00 | 0.00 |
| C    |       |     |     |     |        |         |        |      |      |
| ATOM | 11161 | CE1 | PHE | 217 | 31.128 | -89.169 | 16.016 | 1.00 | 0.00 |
| C    |       |     |     |     |        |         |        |      |      |
| ATOM | 11162 | CZ  | PHE | 217 | 29.826 | -89.586 | 16.158 | 1.00 | 0.00 |
| C    |       |     |     |     |        |         |        |      |      |
| ATOM | 11163 | CE2 | PHE | 217 | 29.142 | -89.546 | 17.400 | 1.00 | 0.00 |
| C    |       |     |     |     |        |         |        |      |      |
| ATOM | 11164 | CD2 | PHE | 217 | 29.707 | -88.991 | 18.525 | 1.00 | 0.00 |
| C    |       |     |     |     |        |         |        |      |      |
| ATOM | 11165 | C   | PHE | 217 | 33.043 | -87.185 | 21.443 | 1.00 | 0.00 |
| C    |       |     |     |     |        |         |        |      |      |
| ATOM | 11166 | O   | PHE | 217 | 32.363 | -87.054 | 22.476 | 1.00 | 0.00 |
| O    |       |     |     |     |        |         |        |      |      |
| ATOM | 11167 | N   | HIE | 218 | 34.175 | -86.454 | 21.222 | 1.00 | 0.00 |
| N    |       |     |     |     |        |         |        |      |      |
| ATOM | 11168 | CA  | HIE | 218 | 34.696 | -85.432 | 22.153 | 1.00 | 0.00 |
| C    |       |     |     |     |        |         |        |      |      |

|      |       |     |     |     |        |         |        |      |      |
|------|-------|-----|-----|-----|--------|---------|--------|------|------|
| ATOM | 11169 | CB  | HIE | 218 | 36.214 | -85.617 | 22.301 | 1.00 | 0.00 |
| C    |       |     |     |     |        |         |        |      |      |
| ATOM | 11170 | CG  | HIE | 218 | 37.085 | -85.474 | 21.117 | 1.00 | 0.00 |
| C    |       |     |     |     |        |         |        |      |      |
| ATOM | 11171 | ND1 | HIE | 218 | 37.160 | -84.374 | 20.303 | 1.00 | 0.00 |
| N    |       |     |     |     |        |         |        |      |      |
| ATOM | 11172 | CE1 | HIE | 218 | 38.050 | -84.604 | 19.326 | 1.00 | 0.00 |
| C    |       |     |     |     |        |         |        |      |      |
| ATOM | 11173 | NE2 | HIE | 218 | 38.556 | -85.870 | 19.593 | 1.00 | 0.00 |
| N    |       |     |     |     |        |         |        |      |      |
| ATOM | 11174 | CD2 | HIE | 218 | 38.005 | -86.382 | 20.726 | 1.00 | 0.00 |
| C    |       |     |     |     |        |         |        |      |      |
| ATOM | 11175 | C   | HIE | 218 | 34.205 | -84.019 | 21.823 | 1.00 | 0.00 |
| C    |       |     |     |     |        |         |        |      |      |
| ATOM | 11176 | O   | HIE | 218 | 33.932 | -83.737 | 20.643 | 1.00 | 0.00 |
| O    |       |     |     |     |        |         |        |      |      |
| ATOM | 11177 | N   | GLY | 219 | 34.103 | -83.163 | 22.834 | 1.00 | 0.00 |
| N    |       |     |     |     |        |         |        |      |      |
| ATOM | 11178 | CA  | GLY | 219 | 33.623 | -81.781 | 22.672 | 1.00 | 0.00 |
| C    |       |     |     |     |        |         |        |      |      |
| ATOM | 11179 | C   | GLY | 219 | 32.174 | -81.753 | 22.076 | 1.00 | 0.00 |
| C    |       |     |     |     |        |         |        |      |      |
| ATOM | 11180 | O   | GLY | 219 | 31.415 | -82.711 | 22.204 | 1.00 | 0.00 |
| O    |       |     |     |     |        |         |        |      |      |
| ATOM | 11181 | N   | ARG | 220 | 31.710 | -80.606 | 21.580 | 1.00 | 0.00 |
| N    |       |     |     |     |        |         |        |      |      |
| ATOM | 11182 | CA  | ARG | 220 | 32.425 | -79.357 | 21.190 | 1.00 | 0.00 |
| C    |       |     |     |     |        |         |        |      |      |
| ATOM | 11183 | CB  | ARG | 220 | 32.902 | -79.651 | 19.770 | 1.00 | 0.00 |
| C    |       |     |     |     |        |         |        |      |      |
| ATOM | 11184 | CG  | ARG | 220 | 34.029 | -78.824 | 19.172 | 1.00 | 0.00 |
| C    |       |     |     |     |        |         |        |      |      |
| ATOM | 11185 | CD  | ARG | 220 | 35.160 | -78.216 | 20.123 | 1.00 | 0.00 |
| C    |       |     |     |     |        |         |        |      |      |
| ATOM | 11186 | NE  | ARG | 220 | 36.169 | -77.476 | 19.323 | 1.00 | 0.00 |
| N    |       |     |     |     |        |         |        |      |      |
| ATOM | 11187 | CZ  | ARG | 220 | 37.012 | -76.568 | 19.853 | 1.00 | 0.00 |
| C    |       |     |     |     |        |         |        |      |      |
| ATOM | 11188 | NH1 | ARG | 220 | 38.126 | -76.187 | 19.207 | 1.00 | 0.00 |
| N    |       |     |     |     |        |         |        |      |      |
| ATOM | 11189 | NH2 | ARG | 220 | 36.740 | -75.960 | 20.983 | 1.00 | 0.00 |
| N1+  |       |     |     |     |        |         |        |      |      |
| ATOM | 11190 | C   | ARG | 220 | 31.625 | -78.049 | 21.044 | 1.00 | 0.00 |
| C    |       |     |     |     |        |         |        |      |      |
| ATOM | 11191 | O   | ARG | 220 | 32.122 | -76.899 | 21.092 | 1.00 | 0.00 |
| O    |       |     |     |     |        |         |        |      |      |
| ATOM | 11192 | N   | THR | 221 | 30.336 | -78.178 | 20.814 | 1.00 | 0.00 |
| N    |       |     |     |     |        |         |        |      |      |
| ATOM | 11193 | CA  | THR | 221 | 29.390 | -77.014 | 20.484 | 1.00 | 0.00 |
| C    |       |     |     |     |        |         |        |      |      |
| ATOM | 11194 | CB  | THR | 221 | 28.038 | -77.544 | 20.029 | 1.00 | 0.00 |
| C    |       |     |     |     |        |         |        |      |      |
| ATOM | 11195 | CG2 | THR | 221 | 27.235 | -76.490 | 19.323 | 1.00 | 0.00 |
| C    |       |     |     |     |        |         |        |      |      |

|      |       |     |     |     |        |         |        |      |      |
|------|-------|-----|-----|-----|--------|---------|--------|------|------|
| ATOM | 11196 | OG1 | THR | 221 | 28.267 | -78.522 | 19.062 | 1.00 | 0.00 |
| O    |       |     |     |     |        |         |        |      |      |
| ATOM | 11197 | C   | THR | 221 | 29.119 | -76.088 | 21.609 | 1.00 | 0.00 |
| C    |       |     |     |     |        |         |        |      |      |
| ATOM | 11198 | O   | THR | 221 | 28.768 | -76.660 | 22.677 | 1.00 | 0.00 |
| O    |       |     |     |     |        |         |        |      |      |
| ATOM | 11199 | N   | LEU | 222 | 29.336 | -74.875 | 21.561 | 1.00 | 0.00 |
| N    |       |     |     |     |        |         |        |      |      |
| ATOM | 11200 | CA  | LEU | 222 | 28.964 | -73.905 | 22.607 | 1.00 | 0.00 |
| C    |       |     |     |     |        |         |        |      |      |
| ATOM | 11201 | CB  | LEU | 222 | 30.043 | -73.625 | 23.649 | 1.00 | 0.00 |
| C    |       |     |     |     |        |         |        |      |      |
| ATOM | 11202 | CG  | LEU | 222 | 30.239 | -74.794 | 24.659 | 1.00 | 0.00 |
| C    |       |     |     |     |        |         |        |      |      |
| ATOM | 11203 | CD1 | LEU | 222 | 31.330 | -74.385 | 25.671 | 1.00 | 0.00 |
| C    |       |     |     |     |        |         |        |      |      |
| ATOM | 11204 | CD2 | LEU | 222 | 28.983 | -75.227 | 25.467 | 1.00 | 0.00 |
| C    |       |     |     |     |        |         |        |      |      |
| ATOM | 11205 | C   | LEU | 222 | 28.477 | -72.561 | 21.938 | 1.00 | 0.00 |
| C    |       |     |     |     |        |         |        |      |      |
| ATOM | 11206 | O   | LEU | 222 | 28.899 | -72.283 | 20.816 | 1.00 | 0.00 |
| O    |       |     |     |     |        |         |        |      |      |
| ATOM | 11207 | N   | HIP | 223 | 27.647 | -71.827 | 22.667 | 1.00 | 0.00 |
| N    |       |     |     |     |        |         |        |      |      |
| ATOM | 11208 | CA  | HIP | 223 | 27.170 | -70.530 | 22.191 | 1.00 | 0.00 |
| C    |       |     |     |     |        |         |        |      |      |
| ATOM | 11209 | CB  | HIP | 223 | 25.717 | -70.679 | 21.564 | 1.00 | 0.00 |
| C    |       |     |     |     |        |         |        |      |      |
| ATOM | 11210 | CG  | HIP | 223 | 25.590 | -71.818 | 20.610 | 1.00 | 0.00 |
| C    |       |     |     |     |        |         |        |      |      |
| ATOM | 11211 | ND1 | HIP | 223 | 26.333 | -71.944 | 19.398 | 1.00 | 0.00 |
| N1+  |       |     |     |     |        |         |        |      |      |
| ATOM | 11212 | CE1 | HIP | 223 | 25.816 | -72.946 | 18.660 | 1.00 | 0.00 |
| C    |       |     |     |     |        |         |        |      |      |
| ATOM | 11213 | NE2 | HIP | 223 | 24.866 | -73.561 | 19.434 | 1.00 | 0.00 |
| N    |       |     |     |     |        |         |        |      |      |
| ATOM | 11214 | CD2 | HIP | 223 | 24.732 | -72.863 | 20.663 | 1.00 | 0.00 |
| C    |       |     |     |     |        |         |        |      |      |
| ATOM | 11215 | C   | HIP | 223 | 27.299 | -69.414 | 23.262 | 1.00 | 0.00 |
| C    |       |     |     |     |        |         |        |      |      |
| ATOM | 11216 | O   | HIP | 223 | 27.164 | -69.672 | 24.443 | 1.00 | 0.00 |
| O    |       |     |     |     |        |         |        |      |      |
| ATOM | 11217 | N   | ASP | 224 | 27.444 | -68.137 | 22.740 | 1.00 | 0.00 |
| N    |       |     |     |     |        |         |        |      |      |
| ATOM | 11218 | CA  | ASP | 224 | 27.512 | -66.980 | 23.662 | 1.00 | 0.00 |
| C    |       |     |     |     |        |         |        |      |      |
| ATOM | 11219 | CB  | ASP | 224 | 28.040 | -65.732 | 22.912 | 1.00 | 0.00 |
| C    |       |     |     |     |        |         |        |      |      |
| ATOM | 11220 | CG  | ASP | 224 | 29.401 | -65.731 | 22.281 | 1.00 | 0.00 |
| C    |       |     |     |     |        |         |        |      |      |
| ATOM | 11221 | OD1 | ASP | 224 | 29.594 | -64.755 | 21.558 | 1.00 | 0.00 |
| O    |       |     |     |     |        |         |        |      |      |
| ATOM | 11222 | OD2 | ASP | 224 | 30.301 | -66.590 | 22.615 | 1.00 | 0.00 |
| O1-  |       |     |     |     |        |         |        |      |      |

|      |       |     |     |     |        |         |        |      |      |
|------|-------|-----|-----|-----|--------|---------|--------|------|------|
| ATOM | 11223 | C   | ASP | 224 | 26.363 | -66.610 | 24.529 | 1.00 | 0.00 |
| C    |       |     |     |     |        |         |        |      |      |
| ATOM | 11224 | O   | ASP | 224 | 25.218 | -66.793 | 24.077 | 1.00 | 0.00 |
| O    |       |     |     |     |        |         |        |      |      |
| ATOM | 11225 | N   | ASP | 225 | 26.590 | -66.170 | 25.774 | 1.00 | 0.00 |
| N    |       |     |     |     |        |         |        |      |      |
| ATOM | 11226 | CA  | ASP | 225 | 25.508 | -65.829 | 26.695 | 1.00 | 0.00 |
| C    |       |     |     |     |        |         |        |      |      |
| ATOM | 11227 | CB  | ASP | 225 | 26.121 | -65.512 | 28.147 | 1.00 | 0.00 |
| C    |       |     |     |     |        |         |        |      |      |
| ATOM | 11228 | CG  | ASP | 225 | 26.662 | -66.688 | 28.942 | 1.00 | 0.00 |
| C    |       |     |     |     |        |         |        |      |      |
| ATOM | 11229 | OD1 | ASP | 225 | 27.072 | -66.389 | 30.098 | 1.00 | 0.00 |
| O    |       |     |     |     |        |         |        |      |      |
| ATOM | 11230 | OD2 | ASP | 225 | 26.583 | -67.895 | 28.559 | 1.00 | 0.00 |
| O1-  |       |     |     |     |        |         |        |      |      |
| ATOM | 11231 | C   | ASP | 225 | 24.719 | -64.659 | 26.096 | 1.00 | 0.00 |
| C    |       |     |     |     |        |         |        |      |      |
| ATOM | 11232 | O   | ASP | 225 | 25.312 | -63.787 | 25.464 | 1.00 | 0.00 |
| O    |       |     |     |     |        |         |        |      |      |
| ATOM | 11233 | N   | ASP | 226 | 23.381 | -64.689 | 26.232 | 1.00 | 0.00 |
| N    |       |     |     |     |        |         |        |      |      |
| ATOM | 11234 | CA  | ASP | 226 | 22.469 | -63.816 | 25.513 | 1.00 | 0.00 |
| C    |       |     |     |     |        |         |        |      |      |
| ATOM | 11235 | CB  | ASP | 226 | 22.594 | -62.503 | 26.229 | 1.00 | 0.00 |
| C    |       |     |     |     |        |         |        |      |      |
| ATOM | 11236 | CG  | ASP | 226 | 21.397 | -61.590 | 26.183 | 1.00 | 0.00 |
| C    |       |     |     |     |        |         |        |      |      |
| ATOM | 11237 | OD1 | ASP | 226 | 20.262 | -61.990 | 26.428 | 1.00 | 0.00 |
| O    |       |     |     |     |        |         |        |      |      |
| ATOM | 11238 | OD2 | ASP | 226 | 21.474 | -60.352 | 25.883 | 1.00 | 0.00 |
| O1-  |       |     |     |     |        |         |        |      |      |
| ATOM | 11239 | C   | ASP | 226 | 22.381 | -63.847 | 23.965 | 1.00 | 0.00 |
| C    |       |     |     |     |        |         |        |      |      |
| ATOM | 11240 | O   | ASP | 226 | 21.478 | -63.230 | 23.352 | 1.00 | 0.00 |
| O    |       |     |     |     |        |         |        |      |      |
| ATOM | 11241 | N   | SER | 227 | 23.184 | -64.682 | 23.257 | 1.00 | 0.00 |
| N    |       |     |     |     |        |         |        |      |      |
| ATOM | 11242 | CA  | SER | 227 | 22.911 | -64.984 | 21.860 | 1.00 | 0.00 |
| C    |       |     |     |     |        |         |        |      |      |
| ATOM | 11243 | CB  | SER | 227 | 23.952 | -65.908 | 21.171 | 1.00 | 0.00 |
| C    |       |     |     |     |        |         |        |      |      |
| ATOM | 11244 | OG  | SER | 227 | 23.915 | -67.207 | 21.626 | 1.00 | 0.00 |
| O    |       |     |     |     |        |         |        |      |      |
| ATOM | 11245 | C   | SER | 227 | 21.491 | -65.482 | 21.518 | 1.00 | 0.00 |
| C    |       |     |     |     |        |         |        |      |      |
| ATOM | 11246 | O   | SER | 227 | 20.876 | -66.215 | 22.353 | 1.00 | 0.00 |
| O    |       |     |     |     |        |         |        |      |      |
| ATOM | 11247 | N   | CYS | 228 | 20.979 | -65.172 | 20.355 | 1.00 | 0.00 |
| N    |       |     |     |     |        |         |        |      |      |
| ATOM | 11248 | CA  | CYS | 228 | 19.864 | -65.797 | 19.696 | 1.00 | 0.00 |
| C    |       |     |     |     |        |         |        |      |      |
| ATOM | 11249 | CB  | CYS | 228 | 19.096 | -64.681 | 18.937 | 1.00 | 0.00 |
| C    |       |     |     |     |        |         |        |      |      |

|      |       |     |     |     |        |         |        |      |      |
|------|-------|-----|-----|-----|--------|---------|--------|------|------|
| ATOM | 11250 | SG  | CYS | 228 | 17.673 | -65.046 | 18.065 | 1.00 | 0.00 |
| S    |       |     |     |     |        |         |        |      |      |
| ATOM | 11251 | C   | CYS | 228 | 20.286 | -67.071 | 18.948 | 1.00 | 0.00 |
| C    |       |     |     |     |        |         |        |      |      |
| ATOM | 11252 | O   | CYS | 228 | 21.262 | -67.105 | 18.214 | 1.00 | 0.00 |
| O    |       |     |     |     |        |         |        |      |      |
| ATOM | 11253 | N   | GLN | 229 | 19.551 | -68.153 | 19.145 | 1.00 | 0.00 |
| N    |       |     |     |     |        |         |        |      |      |
| ATOM | 11254 | CA  | GLN | 229 | 19.833 | -69.511 | 18.604 | 1.00 | 0.00 |
| C    |       |     |     |     |        |         |        |      |      |
| ATOM | 11255 | CB  | GLN | 229 | 20.583 | -70.416 | 19.649 | 1.00 | 0.00 |
| C    |       |     |     |     |        |         |        |      |      |
| ATOM | 11256 | CG  | GLN | 229 | 21.924 | -69.877 | 20.099 | 1.00 | 0.00 |
| C    |       |     |     |     |        |         |        |      |      |
| ATOM | 11257 | CD  | GLN | 229 | 22.920 | -69.782 | 18.973 | 1.00 | 0.00 |
| C    |       |     |     |     |        |         |        |      |      |
| ATOM | 11258 | OE1 | GLN | 229 | 22.908 | -70.595 | 18.122 | 1.00 | 0.00 |
| O    |       |     |     |     |        |         |        |      |      |
| ATOM | 11259 | NE2 | GLN | 229 | 23.749 | -68.688 | 18.904 | 1.00 | 0.00 |
| N    |       |     |     |     |        |         |        |      |      |
| ATOM | 11260 | C   | GLN | 229 | 18.493 | -70.142 | 18.136 | 1.00 | 0.00 |
| C    |       |     |     |     |        |         |        |      |      |
| ATOM | 11261 | O   | GLN | 229 | 17.386 | -69.779 | 18.590 | 1.00 | 0.00 |
| O    |       |     |     |     |        |         |        |      |      |
| ATOM | 11262 | N   | VAL | 230 | 18.543 | -71.161 | 17.237 | 1.00 | 0.00 |
| N    |       |     |     |     |        |         |        |      |      |
| ATOM | 11263 | CA  | VAL | 230 | 17.429 | -72.047 | 16.946 | 1.00 | 0.00 |
| C    |       |     |     |     |        |         |        |      |      |
| ATOM | 11264 | CB  | VAL | 230 | 16.855 | -71.782 | 15.562 | 1.00 | 0.00 |
| C    |       |     |     |     |        |         |        |      |      |
| ATOM | 11265 | CG1 | VAL | 230 | 15.633 | -72.671 | 15.333 | 1.00 | 0.00 |
| C    |       |     |     |     |        |         |        |      |      |
| ATOM | 11266 | CG2 | VAL | 230 | 16.260 | -70.355 | 15.368 | 1.00 | 0.00 |
| C    |       |     |     |     |        |         |        |      |      |
| ATOM | 11267 | C   | VAL | 230 | 17.870 | -73.457 | 17.114 | 1.00 | 0.00 |
| C    |       |     |     |     |        |         |        |      |      |
| ATOM | 11268 | O   | VAL | 230 | 18.956 | -73.656 | 16.602 | 1.00 | 0.00 |
| O    |       |     |     |     |        |         |        |      |      |
| ATOM | 11269 | N   | ILE | 231 | 17.248 | -74.381 | 17.882 | 1.00 | 0.00 |
| N    |       |     |     |     |        |         |        |      |      |
| ATOM | 11270 | CA  | ILE | 231 | 17.825 | -75.800 | 18.197 | 1.00 | 0.00 |
| C    |       |     |     |     |        |         |        |      |      |
| ATOM | 11271 | CB  | ILE | 231 | 18.333 | -75.923 | 19.681 | 1.00 | 0.00 |
| C    |       |     |     |     |        |         |        |      |      |
| ATOM | 11272 | CG2 | ILE | 231 | 19.180 | -77.252 | 19.934 | 1.00 | 0.00 |
| C    |       |     |     |     |        |         |        |      |      |
| ATOM | 11273 | CG1 | ILE | 231 | 19.262 | -74.724 | 20.165 | 1.00 | 0.00 |
| C    |       |     |     |     |        |         |        |      |      |
| ATOM | 11274 | CD1 | ILE | 231 | 20.643 | -74.704 | 19.510 | 1.00 | 0.00 |
| C    |       |     |     |     |        |         |        |      |      |
| ATOM | 11275 | C   | ILE | 231 | 16.759 | -76.874 | 18.049 | 1.00 | 0.00 |
| C    |       |     |     |     |        |         |        |      |      |
| ATOM | 11276 | O   | ILE | 231 | 15.618 | -76.518 | 18.318 | 1.00 | 0.00 |
| O    |       |     |     |     |        |         |        |      |      |

|      |       |     |     |     |        |         |        |      |      |
|------|-------|-----|-----|-----|--------|---------|--------|------|------|
| ATOM | 11277 | N   | PRO | 232 | 17.089 | -78.066 | 17.569 | 1.00 | 0.00 |
| N    |       |     |     |     |        |         |        |      |      |
| ATOM | 11278 | CD  | PRO | 232 | 18.212 | -78.396 | 16.748 | 1.00 | 0.00 |
| C    |       |     |     |     |        |         |        |      |      |
| ATOM | 11279 | CG  | PRO | 232 | 17.985 | -79.924 | 16.481 | 1.00 | 0.00 |
| C    |       |     |     |     |        |         |        |      |      |
| ATOM | 11280 | CB  | PRO | 232 | 16.497 | -80.219 | 16.586 | 1.00 | 0.00 |
| C    |       |     |     |     |        |         |        |      |      |
| ATOM | 11281 | CA  | PRO | 232 | 16.051 | -79.145 | 17.570 | 1.00 | 0.00 |
| C    |       |     |     |     |        |         |        |      |      |
| ATOM | 11282 | C   | PRO | 232 | 15.729 | -79.731 | 18.982 | 1.00 | 0.00 |
| C    |       |     |     |     |        |         |        |      |      |
| ATOM | 11283 | O   | PRO | 232 | 16.613 | -80.142 | 19.734 | 1.00 | 0.00 |
| O    |       |     |     |     |        |         |        |      |      |
| ATOM | 11284 | N   | VAL | 233 | 14.458 | -80.031 | 19.141 | 1.00 | 0.00 |
| N    |       |     |     |     |        |         |        |      |      |
| ATOM | 11285 | CA  | VAL | 233 | 13.951 | -80.305 | 20.480 | 1.00 | 0.00 |
| C    |       |     |     |     |        |         |        |      |      |
| ATOM | 11286 | CB  | VAL | 233 | 12.643 | -79.501 | 20.566 | 1.00 | 0.00 |
| C    |       |     |     |     |        |         |        |      |      |
| ATOM | 11287 | CG1 | VAL | 233 | 11.967 | -79.729 | 21.947 | 1.00 | 0.00 |
| C    |       |     |     |     |        |         |        |      |      |
| ATOM | 11288 | CG2 | VAL | 233 | 12.834 | -77.978 | 20.444 | 1.00 | 0.00 |
| C    |       |     |     |     |        |         |        |      |      |
| ATOM | 11289 | C   | VAL | 233 | 13.659 | -81.765 | 20.587 | 1.00 | 0.00 |
| C    |       |     |     |     |        |         |        |      |      |
| ATOM | 11290 | O   | VAL | 233 | 13.025 | -82.316 | 19.704 | 1.00 | 0.00 |
| O    |       |     |     |     |        |         |        |      |      |
| ATOM | 11291 | N   | LEU | 234 | 14.268 | -82.427 | 21.597 | 1.00 | 0.00 |
| N    |       |     |     |     |        |         |        |      |      |
| ATOM | 11292 | CA  | LEU | 234 | 14.315 | -83.987 | 21.707 | 1.00 | 0.00 |
| C    |       |     |     |     |        |         |        |      |      |
| ATOM | 11293 | CB  | LEU | 234 | 15.245 | -84.313 | 22.922 | 1.00 | 0.00 |
| C    |       |     |     |     |        |         |        |      |      |
| ATOM | 11294 | CG  | LEU | 234 | 15.696 | -85.757 | 22.776 | 1.00 | 0.00 |
| C    |       |     |     |     |        |         |        |      |      |
| ATOM | 11295 | CD1 | LEU | 234 | 16.748 | -86.096 | 21.747 | 1.00 | 0.00 |
| C    |       |     |     |     |        |         |        |      |      |
| ATOM | 11296 | CD2 | LEU | 234 | 16.157 | -86.166 | 24.226 | 1.00 | 0.00 |
| C    |       |     |     |     |        |         |        |      |      |
| ATOM | 11297 | C   | LEU | 234 | 12.901 | -84.656 | 21.871 | 1.00 | 0.00 |
| C    |       |     |     |     |        |         |        |      |      |
| ATOM | 11298 | O   | LEU | 234 | 12.134 | -84.245 | 22.726 | 1.00 | 0.00 |
| O    |       |     |     |     |        |         |        |      |      |
| ATOM | 11299 | N   | PRO | 235 | 12.485 | -85.584 | 20.990 | 1.00 | 0.00 |
| N    |       |     |     |     |        |         |        |      |      |
| ATOM | 11300 | CD  | PRO | 235 | 13.288 | -86.205 | 19.931 | 1.00 | 0.00 |
| C    |       |     |     |     |        |         |        |      |      |
| ATOM | 11301 | CG  | PRO | 235 | 12.711 | -87.536 | 19.638 | 1.00 | 0.00 |
| C    |       |     |     |     |        |         |        |      |      |
| ATOM | 11302 | CB  | PRO | 235 | 11.222 | -87.243 | 19.867 | 1.00 | 0.00 |
| C    |       |     |     |     |        |         |        |      |      |
| ATOM | 11303 | CA  | PRO | 235 | 11.193 | -86.253 | 21.089 | 1.00 | 0.00 |
| C    |       |     |     |     |        |         |        |      |      |

|      |       |     |     |     |        |         |        |      |      |
|------|-------|-----|-----|-----|--------|---------|--------|------|------|
| ATOM | 11304 | C   | PRO | 235 | 11.083 | -86.975 | 22.439 | 1.00 | 0.00 |
| C    |       |     |     |     |        |         |        |      |      |
| ATOM | 11305 | O   | PRO | 235 | 12.145 | -87.428 | 22.952 | 1.00 | 0.00 |
| O    |       |     |     |     |        |         |        |      |      |
| ATOM | 11306 | N   | GLN | 236 | 9.861  | -87.197 | 22.952 | 1.00 | 0.00 |
| N    |       |     |     |     |        |         |        |      |      |
| ATOM | 11307 | CA  | GLN | 236 | 9.466  | -88.091 | 24.031 | 1.00 | 0.00 |
| C    |       |     |     |     |        |         |        |      |      |
| ATOM | 11308 | CB  | GLN | 236 | 10.012 | -89.529 | 23.797 | 1.00 | 0.00 |
| C    |       |     |     |     |        |         |        |      |      |
| ATOM | 11309 | CG  | GLN | 236 | 9.293  | -90.628 | 24.559 | 1.00 | 0.00 |
| C    |       |     |     |     |        |         |        |      |      |
| ATOM | 11310 | CD  | GLN | 236 | 9.907  | -91.977 | 24.303 | 1.00 | 0.00 |
| C    |       |     |     |     |        |         |        |      |      |
| ATOM | 11311 | OE1 | GLN | 236 | 10.875 | -92.099 | 23.594 | 1.00 | 0.00 |
| O    |       |     |     |     |        |         |        |      |      |
| ATOM | 11312 | NE2 | GLN | 236 | 9.341  | -93.069 | 24.753 | 1.00 | 0.00 |
| N    |       |     |     |     |        |         |        |      |      |
| ATOM | 11313 | C   | GLN | 236 | 9.916  | -87.618 | 25.389 | 1.00 | 0.00 |
| C    |       |     |     |     |        |         |        |      |      |
| ATOM | 11314 | O   | GLN | 236 | 9.166  | -87.818 | 26.331 | 1.00 | 0.00 |
| O    |       |     |     |     |        |         |        |      |      |
| ATOM | 11315 | N   | VAL | 237 | 11.154 | -87.029 | 25.553 | 1.00 | 0.00 |
| N    |       |     |     |     |        |         |        |      |      |
| ATOM | 11316 | CA  | VAL | 237 | 11.561 | -86.457 | 26.852 | 1.00 | 0.00 |
| C    |       |     |     |     |        |         |        |      |      |
| ATOM | 11317 | CB  | VAL | 237 | 12.964 | -85.796 | 26.678 | 1.00 | 0.00 |
| C    |       |     |     |     |        |         |        |      |      |
| ATOM | 11318 | CG1 | VAL | 237 | 12.751 | -84.434 | 26.119 | 1.00 | 0.00 |
| C    |       |     |     |     |        |         |        |      |      |
| ATOM | 11319 | CG2 | VAL | 237 | 13.624 | -85.783 | 27.993 | 1.00 | 0.00 |
| C    |       |     |     |     |        |         |        |      |      |
| ATOM | 11320 | C   | VAL | 237 | 10.481 | -85.610 | 27.529 | 1.00 | 0.00 |
| C    |       |     |     |     |        |         |        |      |      |
| ATOM | 11321 | O   | VAL | 237 | 9.710  | -84.953 | 26.794 | 1.00 | 0.00 |
| O    |       |     |     |     |        |         |        |      |      |
| ATOM | 11322 | N   | MET | 238 | 10.443 | -85.665 | 28.840 | 1.00 | 0.00 |
| N    |       |     |     |     |        |         |        |      |      |
| ATOM | 11323 | CA  | MET | 238 | 9.486  | -84.945 | 29.653 | 1.00 | 0.00 |
| C    |       |     |     |     |        |         |        |      |      |
| ATOM | 11324 | CB  | MET | 238 | 8.285  | -85.897 | 29.793 | 1.00 | 0.00 |
| C    |       |     |     |     |        |         |        |      |      |
| ATOM | 11325 | CG  | MET | 238 | 7.112  | -85.160 | 30.421 | 1.00 | 0.00 |
| C    |       |     |     |     |        |         |        |      |      |
| ATOM | 11326 | SD  | MET | 238 | 5.736  | -86.131 | 30.923 | 1.00 | 0.00 |
| S    |       |     |     |     |        |         |        |      |      |
| ATOM | 11327 | CE  | MET | 238 | 4.485  | -84.961 | 31.346 | 1.00 | 0.00 |
| C    |       |     |     |     |        |         |        |      |      |
| ATOM | 11328 | C   | MET | 238 | 10.103 | -84.413 | 30.991 | 1.00 | 0.00 |
| C    |       |     |     |     |        |         |        |      |      |
| ATOM | 11329 | O   | MET | 238 | 9.730  | -83.327 | 31.459 | 1.00 | 0.00 |
| O    |       |     |     |     |        |         |        |      |      |
| ATOM | 11330 | N   | MET | 239 | 11.055 | -85.075 | 31.673 | 1.00 | 0.00 |
| N    |       |     |     |     |        |         |        |      |      |

|      |       |     |     |     |        |         |        |      |      |
|------|-------|-----|-----|-----|--------|---------|--------|------|------|
| ATOM | 11331 | CA  | MET | 239 | 11.977 | -84.461 | 32.683 | 1.00 | 0.00 |
| C    |       |     |     |     |        |         |        |      |      |
| ATOM | 11332 | CB  | MET | 239 | 13.075 | -85.378 | 33.049 | 1.00 | 0.00 |
| C    |       |     |     |     |        |         |        |      |      |
| ATOM | 11333 | CG  | MET | 239 | 14.027 | -85.609 | 31.931 | 1.00 | 0.00 |
| C    |       |     |     |     |        |         |        |      |      |
| ATOM | 11334 | SD  | MET | 239 | 15.420 | -86.746 | 32.505 | 1.00 | 0.00 |
| S    |       |     |     |     |        |         |        |      |      |
| ATOM | 11335 | CE  | MET | 239 | 16.526 | -85.625 | 33.456 | 1.00 | 0.00 |
| C    |       |     |     |     |        |         |        |      |      |
| ATOM | 11336 | C   | MET | 239 | 12.558 | -83.060 | 32.250 | 1.00 | 0.00 |
| C    |       |     |     |     |        |         |        |      |      |
| ATOM | 11337 | O   | MET | 239 | 12.782 | -82.819 | 31.059 | 1.00 | 0.00 |
| O    |       |     |     |     |        |         |        |      |      |
| ATOM | 11338 | N   | ILE | 240 | 12.823 | -82.245 | 33.206 | 1.00 | 0.00 |
| N    |       |     |     |     |        |         |        |      |      |
| ATOM | 11339 | CA  | ILE | 240 | 13.645 | -81.037 | 33.041 | 1.00 | 0.00 |
| C    |       |     |     |     |        |         |        |      |      |
| ATOM | 11340 | CB  | ILE | 240 | 13.259 | -79.956 | 34.105 | 1.00 | 0.00 |
| C    |       |     |     |     |        |         |        |      |      |
| ATOM | 11341 | CG2 | ILE | 240 | 14.255 | -78.731 | 34.157 | 1.00 | 0.00 |
| C    |       |     |     |     |        |         |        |      |      |
| ATOM | 11342 | CG1 | ILE | 240 | 11.850 | -79.449 | 33.842 | 1.00 | 0.00 |
| C    |       |     |     |     |        |         |        |      |      |
| ATOM | 11343 | CD1 | ILE | 240 | 11.284 | -78.576 | 34.950 | 1.00 | 0.00 |
| C    |       |     |     |     |        |         |        |      |      |
| ATOM | 11344 | C   | ILE | 240 | 15.107 | -81.421 | 33.240 | 1.00 | 0.00 |
| C    |       |     |     |     |        |         |        |      |      |
| ATOM | 11345 | O   | ILE | 240 | 15.486 | -82.054 | 34.197 | 1.00 | 0.00 |
| O    |       |     |     |     |        |         |        |      |      |
| ATOM | 11346 | N   | LEU | 241 | 15.955 | -80.945 | 32.308 | 1.00 | 0.00 |
| N    |       |     |     |     |        |         |        |      |      |
| ATOM | 11347 | CA  | LEU | 241 | 17.447 | -81.228 | 32.268 | 1.00 | 0.00 |
| C    |       |     |     |     |        |         |        |      |      |
| ATOM | 11348 | CB  | LEU | 241 | 17.773 | -81.477 | 30.784 | 1.00 | 0.00 |
| C    |       |     |     |     |        |         |        |      |      |
| ATOM | 11349 | CG  | LEU | 241 | 19.202 | -82.113 | 30.610 | 1.00 | 0.00 |
| C    |       |     |     |     |        |         |        |      |      |
| ATOM | 11350 | CD1 | LEU | 241 | 19.232 | -83.550 | 31.051 | 1.00 | 0.00 |
| C    |       |     |     |     |        |         |        |      |      |
| ATOM | 11351 | CD2 | LEU | 241 | 19.491 | -82.032 | 29.087 | 1.00 | 0.00 |
| C    |       |     |     |     |        |         |        |      |      |
| ATOM | 11352 | C   | LEU | 241 | 18.379 | -80.109 | 32.835 | 1.00 | 0.00 |
| C    |       |     |     |     |        |         |        |      |      |
| ATOM | 11353 | O   | LEU | 241 | 18.029 | -78.931 | 32.715 | 1.00 | 0.00 |
| O    |       |     |     |     |        |         |        |      |      |
| ATOM | 11354 | N   | ILE | 242 | 19.487 | -80.555 | 33.525 | 1.00 | 0.00 |
| N    |       |     |     |     |        |         |        |      |      |
| ATOM | 11355 | CA  | ILE | 242 | 20.420 | -79.730 | 34.321 | 1.00 | 0.00 |
| C    |       |     |     |     |        |         |        |      |      |
| ATOM | 11356 | CB  | ILE | 242 | 20.493 | -80.173 | 35.761 | 1.00 | 0.00 |
| C    |       |     |     |     |        |         |        |      |      |
| ATOM | 11357 | CG2 | ILE | 242 | 21.567 | -79.499 | 36.622 | 1.00 | 0.00 |
| C    |       |     |     |     |        |         |        |      |      |



|      |       |     |     |     |        |         |        |      |      |
|------|-------|-----|-----|-----|--------|---------|--------|------|------|
| ATOM | 11358 | CG1 | ILE | 242 | 19.167 | -80.247 | 36.556 | 1.00 | 0.00 |
| C    |       |     |     |     |        |         |        |      |      |
| ATOM | 11359 | CD1 | ILE | 242 | 18.547 | -78.921 | 36.970 | 1.00 | 0.00 |
| C    |       |     |     |     |        |         |        |      |      |
| ATOM | 11360 | C   | ILE | 242 | 21.793 | -79.710 | 33.539 | 1.00 | 0.00 |
| C    |       |     |     |     |        |         |        |      |      |
| ATOM | 11361 | O   | ILE | 242 | 22.244 | -80.719 | 33.052 | 1.00 | 0.00 |
| O    |       |     |     |     |        |         |        |      |      |
| ATOM | 11362 | N   | PRO | 243 | 22.430 | -78.538 | 33.330 | 1.00 | 0.00 |
| N    |       |     |     |     |        |         |        |      |      |
| ATOM | 11363 | CD  | PRO | 243 | 21.947 | -77.194 | 33.721 | 1.00 | 0.00 |
| C    |       |     |     |     |        |         |        |      |      |
| ATOM | 11364 | CG  | PRO | 243 | 22.876 | -76.190 | 33.159 | 1.00 | 0.00 |
| C    |       |     |     |     |        |         |        |      |      |
| ATOM | 11365 | CB  | PRO | 243 | 24.175 | -76.950 | 33.055 | 1.00 | 0.00 |
| C    |       |     |     |     |        |         |        |      |      |
| ATOM | 11366 | CA  | PRO | 243 | 23.823 | -78.496 | 32.805 | 1.00 | 0.00 |
| C    |       |     |     |     |        |         |        |      |      |
| ATOM | 11367 | C   | PRO | 243 | 24.840 | -79.404 | 33.488 | 1.00 | 0.00 |
| C    |       |     |     |     |        |         |        |      |      |
| ATOM | 11368 | O   | PRO | 243 | 24.739 | -79.590 | 34.703 | 1.00 | 0.00 |
| O    |       |     |     |     |        |         |        |      |      |
| ATOM | 11369 | N   | GLY | 244 | 25.765 | -80.037 | 32.732 | 1.00 | 0.00 |
| N    |       |     |     |     |        |         |        |      |      |
| ATOM | 11370 | CA  | GLY | 244 | 26.618 | -81.073 | 33.267 | 1.00 | 0.00 |
| C    |       |     |     |     |        |         |        |      |      |
| ATOM | 11371 | C   | GLY | 244 | 25.965 | -82.488 | 33.568 | 1.00 | 0.00 |
| C    |       |     |     |     |        |         |        |      |      |
| ATOM | 11372 | O   | GLY | 244 | 26.688 | -83.507 | 33.742 | 1.00 | 0.00 |
| O    |       |     |     |     |        |         |        |      |      |
| ATOM | 11373 | N   | GLN | 245 | 24.632 | -82.650 | 33.558 | 1.00 | 0.00 |
| N    |       |     |     |     |        |         |        |      |      |
| ATOM | 11374 | CA  | GLN | 245 | 23.884 | -83.922 | 33.810 | 1.00 | 0.00 |
| C    |       |     |     |     |        |         |        |      |      |
| ATOM | 11375 | CB  | GLN | 245 | 22.379 | -83.588 | 33.944 | 1.00 | 0.00 |
| C    |       |     |     |     |        |         |        |      |      |
| ATOM | 11376 | CG  | GLN | 245 | 21.611 | -84.754 | 34.495 | 1.00 | 0.00 |
| C    |       |     |     |     |        |         |        |      |      |
| ATOM | 11377 | CD  | GLN | 245 | 20.256 | -84.459 | 35.058 | 1.00 | 0.00 |
| C    |       |     |     |     |        |         |        |      |      |
| ATOM | 11378 | OE1 | GLN | 245 | 19.578 | -83.569 | 34.542 | 1.00 | 0.00 |
| O    |       |     |     |     |        |         |        |      |      |
| ATOM | 11379 | NE2 | GLN | 245 | 19.863 | -85.102 | 36.107 | 1.00 | 0.00 |
| N    |       |     |     |     |        |         |        |      |      |
| ATOM | 11380 | C   | GLN | 245 | 24.122 | -84.885 | 32.596 | 1.00 | 0.00 |
| C    |       |     |     |     |        |         |        |      |      |
| ATOM | 11381 | O   | GLN | 245 | 23.909 | -84.408 | 31.459 | 1.00 | 0.00 |
| O    |       |     |     |     |        |         |        |      |      |
| ATOM | 11382 | N   | THR | 246 | 24.466 | -86.168 | 32.835 | 1.00 | 0.00 |
| N    |       |     |     |     |        |         |        |      |      |
| ATOM | 11383 | CA  | THR | 246 | 24.458 | -87.294 | 31.913 | 1.00 | 0.00 |
| C    |       |     |     |     |        |         |        |      |      |
| ATOM | 11384 | CB  | THR | 246 | 25.359 | -88.460 | 32.371 | 1.00 | 0.00 |
| C    |       |     |     |     |        |         |        |      |      |

|      |       |     |     |     |        |         |        |      |      |
|------|-------|-----|-----|-----|--------|---------|--------|------|------|
| ATOM | 11385 | CG2 | THR | 246 | 25.331 | -89.700 | 31.497 | 1.00 | 0.00 |
| C    |       |     |     |     |        |         |        |      |      |
| ATOM | 11386 | OG1 | THR | 246 | 26.725 | -88.096 | 32.288 | 1.00 | 0.00 |
| O    |       |     |     |     |        |         |        |      |      |
| ATOM | 11387 | C   | THR | 246 | 23.052 | -87.769 | 31.569 | 1.00 | 0.00 |
| C    |       |     |     |     |        |         |        |      |      |
| ATOM | 11388 | O   | THR | 246 | 22.176 | -87.819 | 32.515 | 1.00 | 0.00 |
| O    |       |     |     |     |        |         |        |      |      |
| ATOM | 11389 | N   | LEU | 247 | 22.773 | -88.194 | 30.358 | 1.00 | 0.00 |
| N    |       |     |     |     |        |         |        |      |      |
| ATOM | 11390 | CA  | LEU | 247 | 21.435 | -88.466 | 29.854 | 1.00 | 0.00 |
| C    |       |     |     |     |        |         |        |      |      |
| ATOM | 11391 | CB  | LEU | 247 | 20.885 | -87.137 | 29.180 | 1.00 | 0.00 |
| C    |       |     |     |     |        |         |        |      |      |
| ATOM | 11392 | CG  | LEU | 247 | 19.423 | -87.237 | 28.597 | 1.00 | 0.00 |
| C    |       |     |     |     |        |         |        |      |      |
| ATOM | 11393 | CD1 | LEU | 247 | 18.339 | -87.665 | 29.571 | 1.00 | 0.00 |
| C    |       |     |     |     |        |         |        |      |      |
| ATOM | 11394 | CD2 | LEU | 247 | 19.068 | -85.940 | 27.901 | 1.00 | 0.00 |
| C    |       |     |     |     |        |         |        |      |      |
| ATOM | 11395 | C   | LEU | 247 | 21.563 | -89.667 | 28.904 | 1.00 | 0.00 |
| C    |       |     |     |     |        |         |        |      |      |
| ATOM | 11396 | O   | LEU | 247 | 21.985 | -89.529 | 27.781 | 1.00 | 0.00 |
| O    |       |     |     |     |        |         |        |      |      |
| ATOM | 11397 | N   | PRO | 248 | 21.220 | -90.916 | 29.336 | 1.00 | 0.00 |
| N    |       |     |     |     |        |         |        |      |      |
| ATOM | 11398 | CD  | PRO | 248 | 20.834 | -91.166 | 30.680 | 1.00 | 0.00 |
| C    |       |     |     |     |        |         |        |      |      |
| ATOM | 11399 | CG  | PRO | 248 | 20.723 | -92.643 | 30.780 | 1.00 | 0.00 |
| C    |       |     |     |     |        |         |        |      |      |
| ATOM | 11400 | CB  | PRO | 248 | 21.154 | -93.191 | 29.395 | 1.00 | 0.00 |
| C    |       |     |     |     |        |         |        |      |      |
| ATOM | 11401 | CA  | PRO | 248 | 21.117 | -92.005 | 28.429 | 1.00 | 0.00 |
| C    |       |     |     |     |        |         |        |      |      |
| ATOM | 11402 | C   | PRO | 248 | 19.815 | -91.993 | 27.610 | 1.00 | 0.00 |
| C    |       |     |     |     |        |         |        |      |      |
| ATOM | 11403 | O   | PRO | 248 | 18.733 | -91.655 | 28.180 | 1.00 | 0.00 |
| O    |       |     |     |     |        |         |        |      |      |
| ATOM | 11404 | N   | LEU | 249 | 19.862 | -92.327 | 26.288 | 1.00 | 0.00 |
| N    |       |     |     |     |        |         |        |      |      |
| ATOM | 11405 | CA  | LEU | 249 | 18.754 | -92.133 | 25.364 | 1.00 | 0.00 |
| C    |       |     |     |     |        |         |        |      |      |
| ATOM | 11406 | CB  | LEU | 249 | 18.853 | -90.757 | 24.575 | 1.00 | 0.00 |
| C    |       |     |     |     |        |         |        |      |      |
| ATOM | 11407 | CG  | LEU | 249 | 18.584 | -89.563 | 25.416 | 1.00 | 0.00 |
| C    |       |     |     |     |        |         |        |      |      |
| ATOM | 11408 | CD1 | LEU | 249 | 18.871 | -88.291 | 24.582 | 1.00 | 0.00 |
| C    |       |     |     |     |        |         |        |      |      |
| ATOM | 11409 | CD2 | LEU | 249 | 17.207 | -89.391 | 25.970 | 1.00 | 0.00 |
| C    |       |     |     |     |        |         |        |      |      |
| ATOM | 11410 | C   | LEU | 249 | 18.767 | -93.304 | 24.358 | 1.00 | 0.00 |
| C    |       |     |     |     |        |         |        |      |      |
| ATOM | 11411 | O   | LEU | 249 | 19.771 | -93.887 | 23.938 | 1.00 | 0.00 |
| O    |       |     |     |     |        |         |        |      |      |

|      |       |     |     |     |        |          |        |      |      |
|------|-------|-----|-----|-----|--------|----------|--------|------|------|
| ATOM | 11412 | N   | GLN | 250 | 17.510 | -93.640  | 24.008 | 1.00 | 0.00 |
| N    |       |     |     |     |        |          |        |      |      |
| ATOM | 11413 | CA  | GLN | 250 | 17.138 | -94.819  | 23.288 | 1.00 | 0.00 |
| C    |       |     |     |     |        |          |        |      |      |
| ATOM | 11414 | CB  | GLN | 250 | 16.971 | -96.029  | 24.206 | 1.00 | 0.00 |
| C    |       |     |     |     |        |          |        |      |      |
| ATOM | 11415 | CG  | GLN | 250 | 16.722 | -97.318  | 23.419 | 1.00 | 0.00 |
| C    |       |     |     |     |        |          |        |      |      |
| ATOM | 11416 | CD  | GLN | 250 | 17.235 | -98.563  | 24.116 | 1.00 | 0.00 |
| C    |       |     |     |     |        |          |        |      |      |
| ATOM | 11417 | OE1 | GLN | 250 | 18.154 | -98.574  | 24.930 | 1.00 | 0.00 |
| O    |       |     |     |     |        |          |        |      |      |
| ATOM | 11418 | NE2 | GLN | 250 | 16.617 | -99.709  | 23.685 | 1.00 | 0.00 |
| N    |       |     |     |     |        |          |        |      |      |
| ATOM | 11419 | C   | GLN | 250 | 15.919 | -94.553  | 22.345 | 1.00 | 0.00 |
| C    |       |     |     |     |        |          |        |      |      |
| ATOM | 11420 | O   | GLN | 250 | 14.872 | -94.031  | 22.855 | 1.00 | 0.00 |
| O    |       |     |     |     |        |          |        |      |      |
| ATOM | 11421 | N   | LEU | 251 | 16.015 | -94.957  | 21.078 | 1.00 | 0.00 |
| N    |       |     |     |     |        |          |        |      |      |
| ATOM | 11422 | CA  | LEU | 251 | 15.099 | -94.536  | 19.984 | 1.00 | 0.00 |
| C    |       |     |     |     |        |          |        |      |      |
| ATOM | 11423 | CB  | LEU | 251 | 15.658 | -93.284  | 19.324 | 1.00 | 0.00 |
| C    |       |     |     |     |        |          |        |      |      |
| ATOM | 11424 | CG  | LEU | 251 | 16.026 | -92.015  | 20.144 | 1.00 | 0.00 |
| C    |       |     |     |     |        |          |        |      |      |
| ATOM | 11425 | CD1 | LEU | 251 | 17.526 | -92.004  | 20.345 | 1.00 | 0.00 |
| C    |       |     |     |     |        |          |        |      |      |
| ATOM | 11426 | CD2 | LEU | 251 | 15.780 | -90.718  | 19.359 | 1.00 | 0.00 |
| C    |       |     |     |     |        |          |        |      |      |
| ATOM | 11427 | C   | LEU | 251 | 14.801 | -95.747  | 19.074 | 1.00 | 0.00 |
| C    |       |     |     |     |        |          |        |      |      |
| ATOM | 11428 | O   | LEU | 251 | 15.740 | -96.403  | 18.665 | 1.00 | 0.00 |
| O    |       |     |     |     |        |          |        |      |      |
| ATOM | 11429 | N   | PHE | 252 | 13.571 | -95.898  | 18.551 | 1.00 | 0.00 |
| N    |       |     |     |     |        |          |        |      |      |
| ATOM | 11430 | CA  | PHE | 252 | 13.094 | -96.957  | 17.649 | 1.00 | 0.00 |
| C    |       |     |     |     |        |          |        |      |      |
| ATOM | 11431 | CB  | PHE | 252 | 12.280 | -97.986  | 18.447 | 1.00 | 0.00 |
| C    |       |     |     |     |        |          |        |      |      |
| ATOM | 11432 | CG  | PHE | 252 | 12.000 | -99.310  | 17.763 | 1.00 | 0.00 |
| C    |       |     |     |     |        |          |        |      |      |
| ATOM | 11433 | CD1 | PHE | 252 | 12.943 | -99.947  | 16.944 | 1.00 | 0.00 |
| C    |       |     |     |     |        |          |        |      |      |
| ATOM | 11434 | CE1 | PHE | 252 | 12.663 | -101.184 | 16.357 | 1.00 | 0.00 |
| C    |       |     |     |     |        |          |        |      |      |
| ATOM | 11435 | CZ  | PHE | 252 | 11.445 | -101.812 | 16.599 | 1.00 | 0.00 |
| C    |       |     |     |     |        |          |        |      |      |
| ATOM | 11436 | CE2 | PHE | 252 | 10.510 | -101.209 | 17.435 | 1.00 | 0.00 |
| C    |       |     |     |     |        |          |        |      |      |
| ATOM | 11437 | CD2 | PHE | 252 | 10.787 | -99.969  | 18.017 | 1.00 | 0.00 |
| C    |       |     |     |     |        |          |        |      |      |
| ATOM | 11438 | C   | PHE | 252 | 12.293 | -96.424  | 16.423 | 1.00 | 0.00 |
| C    |       |     |     |     |        |          |        |      |      |

|      |       |     |     |     |        |         |        |      |      |
|------|-------|-----|-----|-----|--------|---------|--------|------|------|
| ATOM | 11439 | O   | PHE | 252 | 12.400 | -96.999 | 15.389 | 1.00 | 0.00 |
| O    |       |     |     |     |        |         |        |      |      |
| ATOM | 11440 | N   | HIE | 253 | 11.540 | -95.323 | 16.509 | 1.00 | 0.00 |
| N    |       |     |     |     |        |         |        |      |      |
| ATOM | 11441 | CA  | HIE | 253 | 10.685 | -94.789 | 15.432 | 1.00 | 0.00 |
| C    |       |     |     |     |        |         |        |      |      |
| ATOM | 11442 | CB  | HIE | 253 | 9.735  | -93.703 | 15.986 | 1.00 | 0.00 |
| C    |       |     |     |     |        |         |        |      |      |
| ATOM | 11443 | CG  | HIE | 253 | 8.750  | -93.255 | 14.916 | 1.00 | 0.00 |
| C    |       |     |     |     |        |         |        |      |      |
| ATOM | 11444 | ND1 | HIE | 253 | 9.011  | -92.400 | 13.935 | 1.00 | 0.00 |
| N    |       |     |     |     |        |         |        |      |      |
| ATOM | 11445 | CE1 | HIE | 253 | 7.925  | -92.405 | 13.113 | 1.00 | 0.00 |
| C    |       |     |     |     |        |         |        |      |      |
| ATOM | 11446 | NE2 | HIE | 253 | 7.111  | -93.395 | 13.542 | 1.00 | 0.00 |
| N    |       |     |     |     |        |         |        |      |      |
| ATOM | 11447 | CD2 | HIE | 253 | 7.557  | -93.927 | 14.679 | 1.00 | 0.00 |
| C    |       |     |     |     |        |         |        |      |      |
| ATOM | 11448 | C   | HIE | 253 | 11.572 | -94.301 | 14.257 | 1.00 | 0.00 |
| C    |       |     |     |     |        |         |        |      |      |
| ATOM | 11449 | O   | HIE | 253 | 12.476 | -93.486 | 14.480 | 1.00 | 0.00 |
| O    |       |     |     |     |        |         |        |      |      |
| ATOM | 11450 | N   | PRO | 254 | 11.415 | -94.742 | 13.024 | 1.00 | 0.00 |
| N    |       |     |     |     |        |         |        |      |      |
| ATOM | 11451 | CD  | PRO | 254 | 10.211 | -95.334 | 12.454 | 1.00 | 0.00 |
| C    |       |     |     |     |        |         |        |      |      |
| ATOM | 11452 | CG  | PRO | 254 | 10.286 | -95.055 | 10.940 | 1.00 | 0.00 |
| C    |       |     |     |     |        |         |        |      |      |
| ATOM | 11453 | CB  | PRO | 254 | 11.736 | -95.045 | 10.638 | 1.00 | 0.00 |
| C    |       |     |     |     |        |         |        |      |      |
| ATOM | 11454 | CA  | PRO | 254 | 12.259 | -94.329 | 11.902 | 1.00 | 0.00 |
| C    |       |     |     |     |        |         |        |      |      |
| ATOM | 11455 | C   | PRO | 254 | 12.502 | -92.838 | 11.629 | 1.00 | 0.00 |
| C    |       |     |     |     |        |         |        |      |      |
| ATOM | 11456 | O   | PRO | 254 | 13.600 | -92.426 | 11.297 | 1.00 | 0.00 |
| O    |       |     |     |     |        |         |        |      |      |
| ATOM | 11457 | N   | GLN | 255 | 11.536 | -91.988 | 11.899 | 1.00 | 0.00 |
| N    |       |     |     |     |        |         |        |      |      |
| ATOM | 11458 | CA  | GLN | 255 | 11.653 | -90.601 | 11.808 | 1.00 | 0.00 |
| C    |       |     |     |     |        |         |        |      |      |
| ATOM | 11459 | CB  | GLN | 255 | 10.301 | -89.910 | 11.904 | 1.00 | 0.00 |
| C    |       |     |     |     |        |         |        |      |      |
| ATOM | 11460 | CG  | GLN | 255 | 10.285 | -88.487 | 11.346 | 1.00 | 0.00 |
| C    |       |     |     |     |        |         |        |      |      |
| ATOM | 11461 | CD  | GLN | 255 | 10.800 | -88.451 | 9.836  | 1.00 | 0.00 |
| C    |       |     |     |     |        |         |        |      |      |
| ATOM | 11462 | OE1 | GLN | 255 | 10.188 | -88.949 | 8.942  | 1.00 | 0.00 |
| O    |       |     |     |     |        |         |        |      |      |
| ATOM | 11463 | NE2 | GLN | 255 | 12.008 | -88.001 | 9.639  | 1.00 | 0.00 |
| N    |       |     |     |     |        |         |        |      |      |
| ATOM | 11464 | C   | GLN | 255 | 12.566 | -89.997 | 12.914 | 1.00 | 0.00 |
| C    |       |     |     |     |        |         |        |      |      |
| ATOM | 11465 | O   | GLN | 255 | 13.317 | -89.053 | 12.704 | 1.00 | 0.00 |
| O    |       |     |     |     |        |         |        |      |      |

|      |       |     |     |     |        |         |        |      |      |
|------|-------|-----|-----|-----|--------|---------|--------|------|------|
| ATOM | 11466 | N   | GLU | 256 | 12.439 | -90.587 | 14.103 | 1.00 | 0.00 |
| N    |       |     |     |     |        |         |        |      |      |
| ATOM | 11467 | CA  | GLU | 256 | 13.135 | -90.143 | 15.306 | 1.00 | 0.00 |
| C    |       |     |     |     |        |         |        |      |      |
| ATOM | 11468 | CB  | GLU | 256 | 12.380 | -90.638 | 16.609 | 1.00 | 0.00 |
| C    |       |     |     |     |        |         |        |      |      |
| ATOM | 11469 | CG  | GLU | 256 | 11.123 | -89.754 | 16.825 | 1.00 | 0.00 |
| C    |       |     |     |     |        |         |        |      |      |
| ATOM | 11470 | CD  | GLU | 256 | 10.361 | -90.215 | 18.093 | 1.00 | 0.00 |
| C    |       |     |     |     |        |         |        |      |      |
| ATOM | 11471 | OE1 | GLU | 256 | 9.204  | -89.764 | 18.353 | 1.00 | 0.00 |
| O    |       |     |     |     |        |         |        |      |      |
| ATOM | 11472 | OE2 | GLU | 256 | 10.800 | -91.085 | 18.899 | 1.00 | 0.00 |
| O1-  |       |     |     |     |        |         |        |      |      |
| ATOM | 11473 | C   | GLU | 256 | 14.547 | -90.688 | 15.167 | 1.00 | 0.00 |
| C    |       |     |     |     |        |         |        |      |      |
| ATOM | 11474 | O   | GLU | 256 | 15.426 | -89.840 | 15.341 | 1.00 | 0.00 |
| O    |       |     |     |     |        |         |        |      |      |
| ATOM | 11475 | N   | VAL | 257 | 14.779 | -91.872 | 14.546 | 1.00 | 0.00 |
| N    |       |     |     |     |        |         |        |      |      |
| ATOM | 11476 | CA  | VAL | 257 | 16.078 | -92.454 | 14.116 | 1.00 | 0.00 |
| C    |       |     |     |     |        |         |        |      |      |
| ATOM | 11477 | CB  | VAL | 257 | 15.820 | -93.896 | 13.575 | 1.00 | 0.00 |
| C    |       |     |     |     |        |         |        |      |      |
| ATOM | 11478 | CG1 | VAL | 257 | 17.045 | -94.423 | 12.808 | 1.00 | 0.00 |
| C    |       |     |     |     |        |         |        |      |      |
| ATOM | 11479 | CG2 | VAL | 257 | 15.547 | -94.899 | 14.755 | 1.00 | 0.00 |
| C    |       |     |     |     |        |         |        |      |      |
| ATOM | 11480 | C   | VAL | 257 | 16.729 | -91.534 | 13.128 | 1.00 | 0.00 |
| C    |       |     |     |     |        |         |        |      |      |
| ATOM | 11481 | O   | VAL | 257 | 17.882 | -91.239 | 13.266 | 1.00 | 0.00 |
| O    |       |     |     |     |        |         |        |      |      |
| ATOM | 11482 | N   | SER | 258 | 15.963 | -90.944 | 12.194 | 1.00 | 0.00 |
| N    |       |     |     |     |        |         |        |      |      |
| ATOM | 11483 | CA  | SER | 258 | 16.620 | -90.035 | 11.227 | 1.00 | 0.00 |
| C    |       |     |     |     |        |         |        |      |      |
| ATOM | 11484 | CB  | SER | 258 | 15.730 | -89.781 | 9.966  | 1.00 | 0.00 |
| C    |       |     |     |     |        |         |        |      |      |
| ATOM | 11485 | OG  | SER | 258 | 15.333 | -91.011 | 9.344  | 1.00 | 0.00 |
| O    |       |     |     |     |        |         |        |      |      |
| ATOM | 11486 | C   | SER | 258 | 16.927 | -88.663 | 11.722 | 1.00 | 0.00 |
| C    |       |     |     |     |        |         |        |      |      |
| ATOM | 11487 | O   | SER | 258 | 17.726 | -87.874 | 11.232 | 1.00 | 0.00 |
| O    |       |     |     |     |        |         |        |      |      |
| ATOM | 11488 | N   | MET | 259 | 16.374 | -88.242 | 12.834 | 1.00 | 0.00 |
| N    |       |     |     |     |        |         |        |      |      |
| ATOM | 11489 | CA  | MET | 259 | 16.692 | -86.975 | 13.599 | 1.00 | 0.00 |
| C    |       |     |     |     |        |         |        |      |      |
| ATOM | 11490 | CB  | MET | 259 | 15.453 | -86.712 | 14.471 | 1.00 | 0.00 |
| C    |       |     |     |     |        |         |        |      |      |
| ATOM | 11491 | CG  | MET | 259 | 15.655 | -85.457 | 15.298 | 1.00 | 0.00 |
| C    |       |     |     |     |        |         |        |      |      |
| ATOM | 11492 | SD  | MET | 259 | 16.311 | -85.664 | 16.979 | 1.00 | 0.00 |
| S    |       |     |     |     |        |         |        |      |      |

|      |       |     |     |     |        |         |        |      |      |
|------|-------|-----|-----|-----|--------|---------|--------|------|------|
| ATOM | 11493 | CE  | MET | 259 | 16.034 | -84.005 | 17.687 | 1.00 | 0.00 |
| C    |       |     |     |     |        |         |        |      |      |
| ATOM | 11494 | C   | MET | 259 | 17.954 | -87.155 | 14.411 | 1.00 | 0.00 |
| C    |       |     |     |     |        |         |        |      |      |
| ATOM | 11495 | O   | MET | 259 | 18.849 | -86.330 | 14.187 | 1.00 | 0.00 |
| O    |       |     |     |     |        |         |        |      |      |
| ATOM | 11496 | N   | VAL | 260 | 18.079 | -88.161 | 15.234 | 1.00 | 0.00 |
| N    |       |     |     |     |        |         |        |      |      |
| ATOM | 11497 | CA  | VAL | 260 | 19.336 | -88.403 | 15.975 | 1.00 | 0.00 |
| C    |       |     |     |     |        |         |        |      |      |
| ATOM | 11498 | CB  | VAL | 260 | 19.388 | -89.516 | 17.026 | 1.00 | 0.00 |
| C    |       |     |     |     |        |         |        |      |      |
| ATOM | 11499 | CG1 | VAL | 260 | 18.587 | -89.073 | 18.217 | 1.00 | 0.00 |
| C    |       |     |     |     |        |         |        |      |      |
| ATOM | 11500 | CG2 | VAL | 260 | 18.874 | -90.908 | 16.463 | 1.00 | 0.00 |
| C    |       |     |     |     |        |         |        |      |      |
| ATOM | 11501 | C   | VAL | 260 | 20.513 | -88.644 | 15.017 | 1.00 | 0.00 |
| C    |       |     |     |     |        |         |        |      |      |
| ATOM | 11502 | O   | VAL | 260 | 21.594 | -88.147 | 15.365 | 1.00 | 0.00 |
| O    |       |     |     |     |        |         |        |      |      |
| ATOM | 11503 | N   | ARG | 261 | 20.337 | -89.315 | 13.847 | 1.00 | 0.00 |
| N    |       |     |     |     |        |         |        |      |      |
| ATOM | 11504 | CA  | ARG | 261 | 21.390 | -89.321 | 12.701 | 1.00 | 0.00 |
| C    |       |     |     |     |        |         |        |      |      |
| ATOM | 11505 | CB  | ARG | 261 | 20.911 | -90.268 | 11.594 | 1.00 | 0.00 |
| C    |       |     |     |     |        |         |        |      |      |
| ATOM | 11506 | CG  | ARG | 261 | 21.334 | -91.736 | 11.868 | 1.00 | 0.00 |
| C    |       |     |     |     |        |         |        |      |      |
| ATOM | 11507 | CD  | ARG | 261 | 20.590 | -92.570 | 10.828 | 1.00 | 0.00 |
| C    |       |     |     |     |        |         |        |      |      |
| ATOM | 11508 | NE  | ARG | 261 | 20.889 | -94.017 | 10.949 | 1.00 | 0.00 |
| N    |       |     |     |     |        |         |        |      |      |
| ATOM | 11509 | CZ  | ARG | 261 | 20.295 | -94.966 | 10.236 | 1.00 | 0.00 |
| C    |       |     |     |     |        |         |        |      |      |
| ATOM | 11510 | NH1 | ARG | 261 | 19.594 | -94.692 | 9.217  | 1.00 | 0.00 |
| N    |       |     |     |     |        |         |        |      |      |
| ATOM | 11511 | NH2 | ARG | 261 | 20.503 | -96.204 | 10.595 | 1.00 | 0.00 |
| N1+  |       |     |     |     |        |         |        |      |      |
| ATOM | 11512 | C   | ARG | 261 | 21.714 | -87.953 | 12.141 | 1.00 | 0.00 |
| C    |       |     |     |     |        |         |        |      |      |
| ATOM | 11513 | O   | ARG | 261 | 22.913 | -87.740 | 11.913 | 1.00 | 0.00 |
| O    |       |     |     |     |        |         |        |      |      |
| ATOM | 11514 | N   | ASN | 262 | 20.713 | -87.045 | 11.978 | 1.00 | 0.00 |
| N    |       |     |     |     |        |         |        |      |      |
| ATOM | 11515 | CA  | ASN | 262 | 20.949 | -85.704 | 11.383 | 1.00 | 0.00 |
| C    |       |     |     |     |        |         |        |      |      |
| ATOM | 11516 | CB  | ASN | 262 | 19.545 | -85.202 | 10.875 | 1.00 | 0.00 |
| C    |       |     |     |     |        |         |        |      |      |
| ATOM | 11517 | CG  | ASN | 262 | 19.585 | -83.845 | 10.263 | 1.00 | 0.00 |
| C    |       |     |     |     |        |         |        |      |      |
| ATOM | 11518 | OD1 | ASN | 262 | 19.141 | -82.884 | 10.866 | 1.00 | 0.00 |
| O    |       |     |     |     |        |         |        |      |      |
| ATOM | 11519 | ND2 | ASN | 262 | 20.174 | -83.725 | 9.145  | 1.00 | 0.00 |
| N    |       |     |     |     |        |         |        |      |      |

|      |       |     |     |     |        |         |        |      |      |
|------|-------|-----|-----|-----|--------|---------|--------|------|------|
| ATOM | 11520 | C   | ASN | 262 | 21.650 | -84.668 | 12.338 | 1.00 | 0.00 |
| C    |       |     |     |     |        |         |        |      |      |
| ATOM | 11521 | O   | ASN | 262 | 22.494 | -83.875 | 11.995 | 1.00 | 0.00 |
| O    |       |     |     |     |        |         |        |      |      |
| ATOM | 11522 | N   | LEU | 263 | 21.382 | -84.831 | 13.663 | 1.00 | 0.00 |
| N    |       |     |     |     |        |         |        |      |      |
| ATOM | 11523 | CA  | LEU | 263 | 22.121 | -84.172 | 14.775 | 1.00 | 0.00 |
| C    |       |     |     |     |        |         |        |      |      |
| ATOM | 11524 | CB  | LEU | 263 | 21.722 | -84.725 | 16.101 | 1.00 | 0.00 |
| C    |       |     |     |     |        |         |        |      |      |
| ATOM | 11525 | CG  | LEU | 263 | 20.264 | -84.456 | 16.586 | 1.00 | 0.00 |
| C    |       |     |     |     |        |         |        |      |      |
| ATOM | 11526 | CD1 | LEU | 263 | 19.989 | -85.175 | 17.971 | 1.00 | 0.00 |
| C    |       |     |     |     |        |         |        |      |      |
| ATOM | 11527 | CD2 | LEU | 263 | 20.086 | -82.928 | 16.889 | 1.00 | 0.00 |
| C    |       |     |     |     |        |         |        |      |      |
| ATOM | 11528 | C   | LEU | 263 | 23.666 | -84.374 | 14.565 | 1.00 | 0.00 |
| C    |       |     |     |     |        |         |        |      |      |
| ATOM | 11529 | O   | LEU | 263 | 24.444 | -83.449 | 14.397 | 1.00 | 0.00 |
| O    |       |     |     |     |        |         |        |      |      |
| ATOM | 11530 | N   | ILE | 264 | 24.143 | -85.617 | 14.376 | 1.00 | 0.00 |
| N    |       |     |     |     |        |         |        |      |      |
| ATOM | 11531 | CA  | ILE | 264 | 25.537 | -85.958 | 14.035 | 1.00 | 0.00 |
| C    |       |     |     |     |        |         |        |      |      |
| ATOM | 11532 | CB  | ILE | 264 | 25.778 | -87.460 | 14.161 | 1.00 | 0.00 |
| C    |       |     |     |     |        |         |        |      |      |
| ATOM | 11533 | CG2 | ILE | 264 | 27.214 | -87.843 | 13.875 | 1.00 | 0.00 |
| C    |       |     |     |     |        |         |        |      |      |
| ATOM | 11534 | CG1 | ILE | 264 | 25.377 | -87.895 | 15.587 | 1.00 | 0.00 |
| C    |       |     |     |     |        |         |        |      |      |
| ATOM | 11535 | CD1 | ILE | 264 | 25.345 | -89.509 | 15.836 | 1.00 | 0.00 |
| C    |       |     |     |     |        |         |        |      |      |
| ATOM | 11536 | C   | ILE | 264 | 26.038 | -85.290 | 12.726 | 1.00 | 0.00 |
| C    |       |     |     |     |        |         |        |      |      |
| ATOM | 11537 | O   | ILE | 264 | 27.234 | -85.024 | 12.650 | 1.00 | 0.00 |
| O    |       |     |     |     |        |         |        |      |      |
| ATOM | 11538 | N   | GLN | 265 | 25.105 | -85.124 | 11.726 | 1.00 | 0.00 |
| N    |       |     |     |     |        |         |        |      |      |
| ATOM | 11539 | CA  | GLN | 265 | 25.552 | -84.537 | 10.405 | 1.00 | 0.00 |
| C    |       |     |     |     |        |         |        |      |      |
| ATOM | 11540 | CB  | GLN | 265 | 24.681 | -84.934 | 9.187  | 1.00 | 0.00 |
| C    |       |     |     |     |        |         |        |      |      |
| ATOM | 11541 | CG  | GLN | 265 | 24.618 | -86.462 | 8.987  | 1.00 | 0.00 |
| C    |       |     |     |     |        |         |        |      |      |
| ATOM | 11542 | CD  | GLN | 265 | 23.346 | -86.926 | 8.142  | 1.00 | 0.00 |
| C    |       |     |     |     |        |         |        |      |      |
| ATOM | 11543 | OE1 | GLN | 265 | 22.170 | -86.867 | 8.508  | 1.00 | 0.00 |
| O    |       |     |     |     |        |         |        |      |      |
| ATOM | 11544 | NE2 | GLN | 265 | 23.663 | -87.290 | 6.906  | 1.00 | 0.00 |
| N    |       |     |     |     |        |         |        |      |      |
| ATOM | 11545 | C   | GLN | 265 | 25.686 | -83.037 | 10.427 | 1.00 | 0.00 |
| C    |       |     |     |     |        |         |        |      |      |
| ATOM | 11546 | O   | GLN | 265 | 26.117 | -82.482 | 9.383  | 1.00 | 0.00 |
| O    |       |     |     |     |        |         |        |      |      |

|      |       |     |     |     |        |         |        |      |      |
|------|-------|-----|-----|-----|--------|---------|--------|------|------|
| ATOM | 11547 | N   | LYS | 266 | 25.356 | -82.377 | 11.545 | 1.00 | 0.00 |
| N    |       |     |     |     |        |         |        |      |      |
| ATOM | 11548 | CA  | LYS | 266 | 25.405 | -80.891 | 11.691 | 1.00 | 0.00 |
| C    |       |     |     |     |        |         |        |      |      |
| ATOM | 11549 | CB  | LYS | 266 | 23.985 | -80.339 | 11.912 | 1.00 | 0.00 |
| C    |       |     |     |     |        |         |        |      |      |
| ATOM | 11550 | CG  | LYS | 266 | 22.964 | -80.704 | 10.808 | 1.00 | 0.00 |
| C    |       |     |     |     |        |         |        |      |      |
| ATOM | 11551 | CD  | LYS | 266 | 21.506 | -80.475 | 11.094 | 1.00 | 0.00 |
| C    |       |     |     |     |        |         |        |      |      |
| ATOM | 11552 | CE  | LYS | 266 | 20.982 | -80.845 | 12.506 | 1.00 | 0.00 |
| C    |       |     |     |     |        |         |        |      |      |
| ATOM | 11553 | NZ  | LYS | 266 | 19.531 | -80.725 | 12.645 | 1.00 | 0.00 |
| N1+  |       |     |     |     |        |         |        |      |      |
| ATOM | 11554 | C   | LYS | 266 | 26.332 | -80.589 | 12.868 | 1.00 | 0.00 |
| C    |       |     |     |     |        |         |        |      |      |
| ATOM | 11555 | O   | LYS | 266 | 27.543 | -80.372 | 12.625 | 1.00 | 0.00 |
| O    |       |     |     |     |        |         |        |      |      |
| ATOM | 11556 | N   | ASP | 267 | 25.897 | -80.770 | 14.162 | 1.00 | 0.00 |
| N    |       |     |     |     |        |         |        |      |      |
| ATOM | 11557 | CA  | ASP | 267 | 26.731 | -80.394 | 15.300 | 1.00 | 0.00 |
| C    |       |     |     |     |        |         |        |      |      |
| ATOM | 11558 | CB  | ASP | 267 | 26.557 | -78.874 | 15.503 | 1.00 | 0.00 |
| C    |       |     |     |     |        |         |        |      |      |
| ATOM | 11559 | CG  | ASP | 267 | 25.128 | -78.391 | 15.842 | 1.00 | 0.00 |
| C    |       |     |     |     |        |         |        |      |      |
| ATOM | 11560 | OD1 | ASP | 267 | 24.247 | -79.180 | 16.267 | 1.00 | 0.00 |
| O    |       |     |     |     |        |         |        |      |      |
| ATOM | 11561 | OD2 | ASP | 267 | 24.952 | -77.145 | 15.702 | 1.00 | 0.00 |
| O1-  |       |     |     |     |        |         |        |      |      |
| ATOM | 11562 | C   | ASP | 267 | 26.470 | -81.146 | 16.600 | 1.00 | 0.00 |
| C    |       |     |     |     |        |         |        |      |      |
| ATOM | 11563 | O   | ASP | 267 | 26.802 | -80.622 | 17.688 | 1.00 | 0.00 |
| O    |       |     |     |     |        |         |        |      |      |
| ATOM | 11564 | N   | ARG | 268 | 25.758 | -82.302 | 16.542 | 1.00 | 0.00 |
| N    |       |     |     |     |        |         |        |      |      |
| ATOM | 11565 | CA  | ARG | 268 | 25.430 | -83.188 | 17.738 | 1.00 | 0.00 |
| C    |       |     |     |     |        |         |        |      |      |
| ATOM | 11566 | CB  | ARG | 268 | 26.670 | -83.866 | 18.440 | 1.00 | 0.00 |
| C    |       |     |     |     |        |         |        |      |      |
| ATOM | 11567 | CG  | ARG | 268 | 27.460 | -84.755 | 17.457 | 1.00 | 0.00 |
| C    |       |     |     |     |        |         |        |      |      |
| ATOM | 11568 | CD  | ARG | 268 | 28.585 | -85.520 | 18.191 | 1.00 | 0.00 |
| C    |       |     |     |     |        |         |        |      |      |
| ATOM | 11569 | NE  | ARG | 268 | 29.722 | -84.625 | 18.268 | 1.00 | 0.00 |
| N    |       |     |     |     |        |         |        |      |      |
| ATOM | 11570 | CZ  | ARG | 268 | 30.504 | -84.214 | 19.196 | 1.00 | 0.00 |
| C    |       |     |     |     |        |         |        |      |      |
| ATOM | 11571 | NH1 | ARG | 268 | 30.170 | -84.488 | 20.438 | 1.00 | 0.00 |
| N    |       |     |     |     |        |         |        |      |      |
| ATOM | 11572 | NH2 | ARG | 268 | 31.606 | -83.573 | 18.988 | 1.00 | 0.00 |
| N1+  |       |     |     |     |        |         |        |      |      |
| ATOM | 11573 | C   | ARG | 268 | 24.519 | -82.575 | 18.856 | 1.00 | 0.00 |
| C    |       |     |     |     |        |         |        |      |      |



|      |       |     |     |     |        |         |        |      |      |
|------|-------|-----|-----|-----|--------|---------|--------|------|------|
| ATOM | 11574 | O   | ARG | 268 | 24.188 | -83.295 | 19.800 | 1.00 | 0.00 |
| O    |       |     |     |     |        |         |        |      |      |
| ATOM | 11575 | N   | THR | 269 | 24.191 | -81.294 | 18.820 | 1.00 | 0.00 |
| N    |       |     |     |     |        |         |        |      |      |
| ATOM | 11576 | CA  | THR | 269 | 23.572 | -80.543 | 19.881 | 1.00 | 0.00 |
| C    |       |     |     |     |        |         |        |      |      |
| ATOM | 11577 | CB  | THR | 269 | 24.170 | -79.108 | 19.903 | 1.00 | 0.00 |
| C    |       |     |     |     |        |         |        |      |      |
| ATOM | 11578 | CG2 | THR | 269 | 23.347 | -78.179 | 20.887 | 1.00 | 0.00 |
| C    |       |     |     |     |        |         |        |      |      |
| ATOM | 11579 | OG1 | THR | 269 | 25.536 | -79.253 | 20.236 | 1.00 | 0.00 |
| O    |       |     |     |     |        |         |        |      |      |
| ATOM | 11580 | C   | THR | 269 | 22.017 | -80.479 | 19.635 | 1.00 | 0.00 |
| C    |       |     |     |     |        |         |        |      |      |
| ATOM | 11581 | O   | THR | 269 | 21.516 | -80.278 | 18.537 | 1.00 | 0.00 |
| O    |       |     |     |     |        |         |        |      |      |
| ATOM | 11582 | N   | PHE | 270 | 21.215 | -80.654 | 20.738 | 1.00 | 0.00 |
| N    |       |     |     |     |        |         |        |      |      |
| ATOM | 11583 | CA  | PHE | 270 | 19.741 | -80.533 | 20.747 | 1.00 | 0.00 |
| C    |       |     |     |     |        |         |        |      |      |
| ATOM | 11584 | CB  | PHE | 270 | 19.267 | -81.986 | 20.678 | 1.00 | 0.00 |
| C    |       |     |     |     |        |         |        |      |      |
| ATOM | 11585 | CG  | PHE | 270 | 19.758 | -82.834 | 21.826 | 1.00 | 0.00 |
| C    |       |     |     |     |        |         |        |      |      |
| ATOM | 11586 | CD1 | PHE | 270 | 20.935 | -83.676 | 21.584 | 1.00 | 0.00 |
| C    |       |     |     |     |        |         |        |      |      |
| ATOM | 11587 | CE1 | PHE | 270 | 21.370 | -84.533 | 22.567 | 1.00 | 0.00 |
| C    |       |     |     |     |        |         |        |      |      |
| ATOM | 11588 | CZ  | PHE | 270 | 20.633 | -84.668 | 23.814 | 1.00 | 0.00 |
| C    |       |     |     |     |        |         |        |      |      |
| ATOM | 11589 | CE2 | PHE | 270 | 19.536 | -83.909 | 24.023 | 1.00 | 0.00 |
| C    |       |     |     |     |        |         |        |      |      |
| ATOM | 11590 | CD2 | PHE | 270 | 19.104 | -83.048 | 23.017 | 1.00 | 0.00 |
| C    |       |     |     |     |        |         |        |      |      |
| ATOM | 11591 | C   | PHE | 270 | 19.238 | -79.835 | 22.028 | 1.00 | 0.00 |
| C    |       |     |     |     |        |         |        |      |      |
| ATOM | 11592 | O   | PHE | 270 | 20.068 | -79.328 | 22.798 | 1.00 | 0.00 |
| O    |       |     |     |     |        |         |        |      |      |
| ATOM | 11593 | N   | ALA | 271 | 17.911 | -79.767 | 22.232 | 1.00 | 0.00 |
| N    |       |     |     |     |        |         |        |      |      |
| ATOM | 11594 | CA  | ALA | 271 | 17.286 | -79.193 | 23.446 | 1.00 | 0.00 |
| C    |       |     |     |     |        |         |        |      |      |
| ATOM | 11595 | CB  | ALA | 271 | 16.672 | -77.776 | 23.212 | 1.00 | 0.00 |
| C    |       |     |     |     |        |         |        |      |      |
| ATOM | 11596 | C   | ALA | 271 | 16.212 | -80.048 | 24.131 | 1.00 | 0.00 |
| C    |       |     |     |     |        |         |        |      |      |
| ATOM | 11597 | O   | ALA | 271 | 15.472 | -80.789 | 23.522 | 1.00 | 0.00 |
| O    |       |     |     |     |        |         |        |      |      |
| ATOM | 11598 | N   | VAL | 272 | 16.231 | -79.895 | 25.464 | 1.00 | 0.00 |
| N    |       |     |     |     |        |         |        |      |      |
| ATOM | 11599 | CA  | VAL | 272 | 15.157 | -80.267 | 26.356 | 1.00 | 0.00 |
| C    |       |     |     |     |        |         |        |      |      |
| ATOM | 11600 | CB  | VAL | 272 | 15.684 | -81.253 | 27.437 | 1.00 | 0.00 |
| C    |       |     |     |     |        |         |        |      |      |

|      |       |     |     |     |        |         |        |      |      |
|------|-------|-----|-----|-----|--------|---------|--------|------|------|
| ATOM | 11601 | CG1 | VAL | 272 | 14.515 | -81.718 | 28.251 | 1.00 | 0.00 |
| C    |       |     |     |     |        |         |        |      |      |
| ATOM | 11602 | CG2 | VAL | 272 | 16.362 | -82.466 | 26.827 | 1.00 | 0.00 |
| C    |       |     |     |     |        |         |        |      |      |
| ATOM | 11603 | C   | VAL | 272 | 14.470 | -78.997 | 26.945 | 1.00 | 0.00 |
| C    |       |     |     |     |        |         |        |      |      |
| ATOM | 11604 | O   | VAL | 272 | 15.153 | -78.155 | 27.501 | 1.00 | 0.00 |
| O    |       |     |     |     |        |         |        |      |      |
| ATOM | 11605 | N   | LEU | 273 | 13.214 | -78.826 | 26.662 | 1.00 | 0.00 |
| N    |       |     |     |     |        |         |        |      |      |
| ATOM | 11606 | CA  | LEU | 273 | 12.300 | -77.725 | 27.174 | 1.00 | 0.00 |
| C    |       |     |     |     |        |         |        |      |      |
| ATOM | 11607 | CB  | LEU | 273 | 10.965 | -77.707 | 26.345 | 1.00 | 0.00 |
| C    |       |     |     |     |        |         |        |      |      |
| ATOM | 11608 | CG  | LEU | 273 | 11.316 | -77.295 | 24.867 | 1.00 | 0.00 |
| C    |       |     |     |     |        |         |        |      |      |
| ATOM | 11609 | CD1 | LEU | 273 | 10.002 | -77.117 | 24.025 | 1.00 | 0.00 |
| C    |       |     |     |     |        |         |        |      |      |
| ATOM | 11610 | CD2 | LEU | 273 | 11.964 | -75.934 | 24.827 | 1.00 | 0.00 |
| C    |       |     |     |     |        |         |        |      |      |
| ATOM | 11611 | C   | LEU | 273 | 12.069 | -77.838 | 28.728 | 1.00 | 0.00 |
| C    |       |     |     |     |        |         |        |      |      |
| ATOM | 11612 | O   | LEU | 273 | 12.512 | -78.778 | 29.383 | 1.00 | 0.00 |
| O    |       |     |     |     |        |         |        |      |      |
| ATOM | 11613 | N   | ALA | 274 | 11.275 | -76.972 | 29.344 | 1.00 | 0.00 |
| N    |       |     |     |     |        |         |        |      |      |
| ATOM | 11614 | CA  | ALA | 274 | 10.905 | -76.923 | 30.772 | 1.00 | 0.00 |
| C    |       |     |     |     |        |         |        |      |      |
| ATOM | 11615 | CB  | ALA | 274 | 11.971 | -76.131 | 31.593 | 1.00 | 0.00 |
| C    |       |     |     |     |        |         |        |      |      |
| ATOM | 11616 | C   | ALA | 274 | 9.554  | -76.308 | 30.910 | 1.00 | 0.00 |
| C    |       |     |     |     |        |         |        |      |      |
| ATOM | 11617 | O   | ALA | 274 | 9.277  | -75.263 | 30.433 | 1.00 | 0.00 |
| O    |       |     |     |     |        |         |        |      |      |
| ATOM | 11618 | N   | TYR | 275 | 8.705  | -77.012 | 31.651 | 1.00 | 0.00 |
| N    |       |     |     |     |        |         |        |      |      |
| ATOM | 11619 | CA  | TYR | 275 | 7.315  | -76.669 | 31.934 | 1.00 | 0.00 |
| C    |       |     |     |     |        |         |        |      |      |
| ATOM | 11620 | CB  | TYR | 275 | 6.474  | -77.980 | 32.103 | 1.00 | 0.00 |
| C    |       |     |     |     |        |         |        |      |      |
| ATOM | 11621 | CG  | TYR | 275 | 6.412  | -78.952 | 30.933 | 1.00 | 0.00 |
| C    |       |     |     |     |        |         |        |      |      |
| ATOM | 11622 | CD1 | TYR | 275 | 6.618  | -78.594 | 29.591 | 1.00 | 0.00 |
| C    |       |     |     |     |        |         |        |      |      |
| ATOM | 11623 | CE1 | TYR | 275 | 6.866  | -79.588 | 28.654 | 1.00 | 0.00 |
| C    |       |     |     |     |        |         |        |      |      |
| ATOM | 11624 | CZ  | TYR | 275 | 6.782  | -80.942 | 29.026 | 1.00 | 0.00 |
| C    |       |     |     |     |        |         |        |      |      |
| ATOM | 11625 | OH  | TYR | 275 | 7.232  | -81.785 | 28.045 | 1.00 | 0.00 |
| O    |       |     |     |     |        |         |        |      |      |
| ATOM | 11626 | CE2 | TYR | 275 | 6.274  | -81.287 | 30.252 | 1.00 | 0.00 |
| C    |       |     |     |     |        |         |        |      |      |
| ATOM | 11627 | CD2 | TYR | 275 | 6.142  | -80.336 | 31.256 | 1.00 | 0.00 |
| C    |       |     |     |     |        |         |        |      |      |

|      |       |     |     |     |        |         |        |      |      |
|------|-------|-----|-----|-----|--------|---------|--------|------|------|
| ATOM | 11628 | C   | TYR | 275 | 7.257  | -75.701 | 33.115 | 1.00 | 0.00 |
| C    |       |     |     |     |        |         |        |      |      |
| ATOM | 11629 | O   | TYR | 275 | 7.906  | -75.996 | 34.093 | 1.00 | 0.00 |
| O    |       |     |     |     |        |         |        |      |      |
| ATOM | 11630 | N   | SER | 276 | 6.408  | -74.690 | 33.128 | 1.00 | 0.00 |
| N    |       |     |     |     |        |         |        |      |      |
| ATOM | 11631 | CA  | SER | 276 | 6.161  | -73.717 | 34.200 | 1.00 | 0.00 |
| C    |       |     |     |     |        |         |        |      |      |
| ATOM | 11632 | CB  | SER | 276 | 5.222  | -72.603 | 33.617 | 1.00 | 0.00 |
| C    |       |     |     |     |        |         |        |      |      |
| ATOM | 11633 | OG  | SER | 276 | 5.189  | -71.475 | 34.493 | 1.00 | 0.00 |
| O    |       |     |     |     |        |         |        |      |      |
| ATOM | 11634 | C   | SER | 276 | 5.558  | -74.336 | 35.423 | 1.00 | 0.00 |
| C    |       |     |     |     |        |         |        |      |      |
| ATOM | 11635 | O   | SER | 276 | 4.916  | -75.420 | 35.439 | 1.00 | 0.00 |
| O    |       |     |     |     |        |         |        |      |      |
| ATOM | 11636 | N   | ASN | 277 | 5.784  | -73.712 | 36.563 | 1.00 | 0.00 |
| N    |       |     |     |     |        |         |        |      |      |
| ATOM | 11637 | CA  | ASN | 277 | 5.307  | -74.271 | 37.887 | 1.00 | 0.00 |
| C    |       |     |     |     |        |         |        |      |      |
| ATOM | 11638 | CB  | ASN | 277 | 6.015  | -73.500 | 39.028 | 1.00 | 0.00 |
| C    |       |     |     |     |        |         |        |      |      |
| ATOM | 11639 | CG  | ASN | 277 | 5.994  | -71.928 | 38.836 | 1.00 | 0.00 |
| C    |       |     |     |     |        |         |        |      |      |
| ATOM | 11640 | OD1 | ASN | 277 | 6.755  | -71.379 | 38.021 | 1.00 | 0.00 |
| O    |       |     |     |     |        |         |        |      |      |
| ATOM | 11641 | ND2 | ASN | 277 | 5.052  | -71.223 | 39.361 | 1.00 | 0.00 |
| N    |       |     |     |     |        |         |        |      |      |
| ATOM | 11642 | C   | ASN | 277 | 3.812  | -74.154 | 38.038 | 1.00 | 0.00 |
| C    |       |     |     |     |        |         |        |      |      |
| ATOM | 11643 | O   | ASN | 277 | 3.141  | -75.042 | 38.565 | 1.00 | 0.00 |
| O    |       |     |     |     |        |         |        |      |      |
| ATOM | 11644 | N   | VAL | 278 | 3.202  | -73.090 | 37.521 | 1.00 | 0.00 |
| N    |       |     |     |     |        |         |        |      |      |
| ATOM | 11645 | CA  | VAL | 278 | 1.744  | -72.938 | 37.566 | 1.00 | 0.00 |
| C    |       |     |     |     |        |         |        |      |      |
| ATOM | 11646 | CB  | VAL | 278 | 1.261  | -71.541 | 37.130 | 1.00 | 0.00 |
| C    |       |     |     |     |        |         |        |      |      |
| ATOM | 11647 | CG1 | VAL | 278 | 1.702  | -70.435 | 38.078 | 1.00 | 0.00 |
| C    |       |     |     |     |        |         |        |      |      |
| ATOM | 11648 | CG2 | VAL | 278 | 1.651  | -71.088 | 35.701 | 1.00 | 0.00 |
| C    |       |     |     |     |        |         |        |      |      |
| ATOM | 11649 | C   | VAL | 278 | 1.068  | -73.987 | 36.681 | 1.00 | 0.00 |
| C    |       |     |     |     |        |         |        |      |      |
| ATOM | 11650 | O   | VAL | 278 | 1.626  | -74.520 | 35.748 | 1.00 | 0.00 |
| O    |       |     |     |     |        |         |        |      |      |
| ATOM | 11651 | N   | GLN | 279 | -0.236 | -74.249 | 36.856 | 1.00 | 0.00 |
| N    |       |     |     |     |        |         |        |      |      |
| ATOM | 11652 | CA  | GLN | 279 | -0.983 | -75.381 | 36.255 | 1.00 | 0.00 |
| C    |       |     |     |     |        |         |        |      |      |
| ATOM | 11653 | CB  | GLN | 279 | -2.411 | -75.577 | 36.881 | 1.00 | 0.00 |
| C    |       |     |     |     |        |         |        |      |      |
| ATOM | 11654 | CG  | GLN | 279 | -3.312 | -74.456 | 36.457 | 1.00 | 0.00 |
| C    |       |     |     |     |        |         |        |      |      |

|      |       |     |     |     |        |         |        |      |      |
|------|-------|-----|-----|-----|--------|---------|--------|------|------|
| ATOM | 11655 | CD  | GLN | 279 | -4.280 | -74.956 | 35.369 | 1.00 | 0.00 |
| C    |       |     |     |     |        |         |        |      |      |
| ATOM | 11656 | OE1 | GLN | 279 | -4.753 | -76.098 | 35.327 | 1.00 | 0.00 |
| O    |       |     |     |     |        |         |        |      |      |
| ATOM | 11657 | NE2 | GLN | 279 | -4.698 | -74.071 | 34.525 | 1.00 | 0.00 |
| N    |       |     |     |     |        |         |        |      |      |
| ATOM | 11658 | C   | GLN | 279 | -1.066 | -75.291 | 34.710 | 1.00 | 0.00 |
| C    |       |     |     |     |        |         |        |      |      |
| ATOM | 11659 | O   | GLN | 279 | -1.399 | -76.249 | 34.028 | 1.00 | 0.00 |
| O    |       |     |     |     |        |         |        |      |      |
| ATOM | 11660 | N   | GLU | 280 | -0.754 | -74.130 | 34.139 | 1.00 | 0.00 |
| N    |       |     |     |     |        |         |        |      |      |
| ATOM | 11661 | CA  | GLU | 280 | -0.648 | -73.904 | 32.603 | 1.00 | 0.00 |
| C    |       |     |     |     |        |         |        |      |      |
| ATOM | 11662 | CB  | GLU | 280 | -0.516 | -72.390 | 32.345 | 1.00 | 0.00 |
| C    |       |     |     |     |        |         |        |      |      |
| ATOM | 11663 | CG  | GLU | 280 | -1.515 | -71.469 | 33.080 | 1.00 | 0.00 |
| C    |       |     |     |     |        |         |        |      |      |
| ATOM | 11664 | CD  | GLU | 280 | -2.992 | -71.841 | 33.058 | 1.00 | 0.00 |
| C    |       |     |     |     |        |         |        |      |      |
| ATOM | 11665 | OE1 | GLU | 280 | -3.622 | -71.536 | 34.075 | 1.00 | 0.00 |
| O    |       |     |     |     |        |         |        |      |      |
| ATOM | 11666 | OE2 | GLU | 280 | -3.481 | -72.281 | 31.964 | 1.00 | 0.00 |
| O1-  |       |     |     |     |        |         |        |      |      |
| ATOM | 11667 | C   | GLU | 280 | 0.462  | -74.746 | 31.977 | 1.00 | 0.00 |
| C    |       |     |     |     |        |         |        |      |      |
| ATOM | 11668 | O   | GLU | 280 | 0.538  | -74.768 | 30.737 | 1.00 | 0.00 |
| O    |       |     |     |     |        |         |        |      |      |
| ATOM | 11669 | N   | ARG | 281 | 1.365  | -75.293 | 32.809 | 1.00 | 0.00 |
| N    |       |     |     |     |        |         |        |      |      |
| ATOM | 11670 | CA  | ARG | 281 | 2.642  | -76.041 | 32.541 | 1.00 | 0.00 |
| C    |       |     |     |     |        |         |        |      |      |
| ATOM | 11671 | CB  | ARG | 281 | 2.282  | -77.603 | 32.649 | 1.00 | 0.00 |
| C    |       |     |     |     |        |         |        |      |      |
| ATOM | 11672 | CG  | ARG | 281 | 1.827  | -78.034 | 34.072 | 1.00 | 0.00 |
| C    |       |     |     |     |        |         |        |      |      |
| ATOM | 11673 | CD  | ARG | 281 | 2.731  | -77.667 | 35.257 | 1.00 | 0.00 |
| C    |       |     |     |     |        |         |        |      |      |
| ATOM | 11674 | NE  | ARG | 281 | 4.114  | -78.197 | 35.296 | 1.00 | 0.00 |
| N    |       |     |     |     |        |         |        |      |      |
| ATOM | 11675 | CZ  | ARG | 281 | 4.510  | -79.520 | 35.227 | 1.00 | 0.00 |
| C    |       |     |     |     |        |         |        |      |      |
| ATOM | 11676 | NH1 | ARG | 281 | 3.598  | -80.453 | 35.241 | 1.00 | 0.00 |
| N    |       |     |     |     |        |         |        |      |      |
| ATOM | 11677 | NH2 | ARG | 281 | 5.750  | -79.893 | 35.224 | 1.00 | 0.00 |
| N1+  |       |     |     |     |        |         |        |      |      |
| ATOM | 11678 | C   | ARG | 281 | 3.332  | -75.627 | 31.219 | 1.00 | 0.00 |
| C    |       |     |     |     |        |         |        |      |      |
| ATOM | 11679 | O   | ARG | 281 | 3.833  | -76.449 | 30.564 | 1.00 | 0.00 |
| O    |       |     |     |     |        |         |        |      |      |
| ATOM | 11680 | N   | GLU | 282 | 3.385  | -74.340 | 30.992 | 1.00 | 0.00 |
| N    |       |     |     |     |        |         |        |      |      |
| ATOM | 11681 | CA  | GLU | 282 | 3.782  | -73.827 | 29.710 | 1.00 | 0.00 |
| C    |       |     |     |     |        |         |        |      |      |

|      |       |     |     |     |        |         |        |      |      |
|------|-------|-----|-----|-----|--------|---------|--------|------|------|
| ATOM | 11682 | CB  | GLU | 282 | 3.169  | -72.488 | 29.384 | 1.00 | 0.00 |
| C    |       |     |     |     |        |         |        |      |      |
| ATOM | 11683 | CG  | GLU | 282 | 3.744  | -71.496 | 30.360 | 1.00 | 0.00 |
| C    |       |     |     |     |        |         |        |      |      |
| ATOM | 11684 | CD  | GLU | 282 | 3.137  | -70.154 | 30.059 | 1.00 | 0.00 |
| C    |       |     |     |     |        |         |        |      |      |
| ATOM | 11685 | OE1 | GLU | 282 | 2.782  | -69.469 | 31.042 | 1.00 | 0.00 |
| O    |       |     |     |     |        |         |        |      |      |
| ATOM | 11686 | OE2 | GLU | 282 | 2.952  | -69.792 | 28.892 | 1.00 | 0.00 |
| O1-  |       |     |     |     |        |         |        |      |      |
| ATOM | 11687 | C   | GLU | 282 | 5.308  | -73.916 | 29.381 | 1.00 | 0.00 |
| C    |       |     |     |     |        |         |        |      |      |
| ATOM | 11688 | O   | GLU | 282 | 6.055  | -73.954 | 30.367 | 1.00 | 0.00 |
| O    |       |     |     |     |        |         |        |      |      |
| ATOM | 11689 | N   | ALA | 283 | 5.630  | -74.025 | 28.074 | 1.00 | 0.00 |
| N    |       |     |     |     |        |         |        |      |      |
| ATOM | 11690 | CA  | ALA | 283 | 7.042  | -74.279 | 27.621 | 1.00 | 0.00 |
| C    |       |     |     |     |        |         |        |      |      |
| ATOM | 11691 | CB  | ALA | 283 | 7.082  | -75.346 | 26.587 | 1.00 | 0.00 |
| C    |       |     |     |     |        |         |        |      |      |
| ATOM | 11692 | C   | ALA | 283 | 7.682  | -72.932 | 27.174 | 1.00 | 0.00 |
| C    |       |     |     |     |        |         |        |      |      |
| ATOM | 11693 | O   | ALA | 283 | 7.549  | -72.401 | 26.029 | 1.00 | 0.00 |
| O    |       |     |     |     |        |         |        |      |      |
| ATOM | 11694 | N   | GLN | 284 | 8.383  | -72.326 | 28.131 | 1.00 | 0.00 |
| N    |       |     |     |     |        |         |        |      |      |
| ATOM | 11695 | CA  | GLN | 284 | 8.906  | -70.952 | 28.134 | 1.00 | 0.00 |
| C    |       |     |     |     |        |         |        |      |      |
| ATOM | 11696 | CB  | GLN | 284 | 8.043  | -70.078 | 29.089 | 1.00 | 0.00 |
| C    |       |     |     |     |        |         |        |      |      |
| ATOM | 11697 | CG  | GLN | 284 | 6.656  | -69.926 | 28.682 | 1.00 | 0.00 |
| C    |       |     |     |     |        |         |        |      |      |
| ATOM | 11698 | CD  | GLN | 284 | 6.496  | -68.919 | 27.583 | 1.00 | 0.00 |
| C    |       |     |     |     |        |         |        |      |      |
| ATOM | 11699 | OE1 | GLN | 284 | 7.449  | -68.337 | 27.045 | 1.00 | 0.00 |
| O    |       |     |     |     |        |         |        |      |      |
| ATOM | 11700 | NE2 | GLN | 284 | 5.355  | -68.776 | 27.023 | 1.00 | 0.00 |
| N    |       |     |     |     |        |         |        |      |      |
| ATOM | 11701 | C   | GLN | 284 | 10.413 | -70.849 | 28.462 | 1.00 | 0.00 |
| C    |       |     |     |     |        |         |        |      |      |
| ATOM | 11702 | O   | GLN | 284 | 11.001 | -69.846 | 28.108 | 1.00 | 0.00 |
| O    |       |     |     |     |        |         |        |      |      |
| ATOM | 11703 | N   | PHE | 285 | 11.074 | -71.951 | 29.009 | 1.00 | 0.00 |
| N    |       |     |     |     |        |         |        |      |      |
| ATOM | 11704 | CA  | PHE | 285 | 12.524 | -72.069 | 29.220 | 1.00 | 0.00 |
| C    |       |     |     |     |        |         |        |      |      |
| ATOM | 11705 | CB  | PHE | 285 | 12.799 | -71.756 | 30.682 | 1.00 | 0.00 |
| C    |       |     |     |     |        |         |        |      |      |
| ATOM | 11706 | CG  | PHE | 285 | 12.179 | -70.420 | 31.035 | 1.00 | 0.00 |
| C    |       |     |     |     |        |         |        |      |      |
| ATOM | 11707 | CD1 | PHE | 285 | 12.972 | -69.258 | 30.802 | 1.00 | 0.00 |
| C    |       |     |     |     |        |         |        |      |      |
| ATOM | 11708 | CE1 | PHE | 285 | 12.397 | -67.988 | 31.025 | 1.00 | 0.00 |
| C    |       |     |     |     |        |         |        |      |      |

|      |       |     |     |     |        |         |        |      |      |
|------|-------|-----|-----|-----|--------|---------|--------|------|------|
| ATOM | 11709 | CZ  | PHE | 285 | 11.083 | -67.884 | 31.538 | 1.00 | 0.00 |
| C    |       |     |     |     |        |         |        |      |      |
| ATOM | 11710 | CE2 | PHE | 285 | 10.278 | -68.984 | 31.765 | 1.00 | 0.00 |
| C    |       |     |     |     |        |         |        |      |      |
| ATOM | 11711 | CD2 | PHE | 285 | 10.831 | -70.246 | 31.527 | 1.00 | 0.00 |
| C    |       |     |     |     |        |         |        |      |      |
| ATOM | 11712 | C   | PHE | 285 | 13.048 | -73.457 | 28.846 | 1.00 | 0.00 |
| C    |       |     |     |     |        |         |        |      |      |
| ATOM | 11713 | O   | PHE | 285 | 12.255 | -74.356 | 28.568 | 1.00 | 0.00 |
| O    |       |     |     |     |        |         |        |      |      |
| ATOM | 11714 | N   | GLY | 286 | 14.342 | -73.695 | 28.954 | 1.00 | 0.00 |
| N    |       |     |     |     |        |         |        |      |      |
| ATOM | 11715 | CA  | GLY | 286 | 14.926 | -75.045 | 28.789 | 1.00 | 0.00 |
| C    |       |     |     |     |        |         |        |      |      |
| ATOM | 11716 | C   | GLY | 286 | 16.452 | -75.143 | 28.833 | 1.00 | 0.00 |
| C    |       |     |     |     |        |         |        |      |      |
| ATOM | 11717 | O   | GLY | 286 | 17.101 | -74.128 | 29.136 | 1.00 | 0.00 |
| O    |       |     |     |     |        |         |        |      |      |
| ATOM | 11718 | N   | THR | 287 | 16.983 | -76.281 | 28.366 | 1.00 | 0.00 |
| N    |       |     |     |     |        |         |        |      |      |
| ATOM | 11719 | CA  | THR | 287 | 18.435 | -76.587 | 28.503 | 1.00 | 0.00 |
| C    |       |     |     |     |        |         |        |      |      |
| ATOM | 11720 | CB  | THR | 287 | 18.682 | -77.411 | 29.840 | 1.00 | 0.00 |
| C    |       |     |     |     |        |         |        |      |      |
| ATOM | 11721 | CG2 | THR | 287 | 20.170 | -78.010 | 29.925 | 1.00 | 0.00 |
| C    |       |     |     |     |        |         |        |      |      |
| ATOM | 11722 | OG1 | THR | 287 | 18.700 | -76.535 | 30.980 | 1.00 | 0.00 |
| O    |       |     |     |     |        |         |        |      |      |
| ATOM | 11723 | C   | THR | 287 | 18.843 | -77.349 | 27.229 | 1.00 | 0.00 |
| C    |       |     |     |     |        |         |        |      |      |
| ATOM | 11724 | O   | THR | 287 | 18.120 | -78.223 | 26.804 | 1.00 | 0.00 |
| O    |       |     |     |     |        |         |        |      |      |
| ATOM | 11725 | N   | THR | 288 | 20.017 | -77.066 | 26.655 | 1.00 | 0.00 |
| N    |       |     |     |     |        |         |        |      |      |
| ATOM | 11726 | CA  | THR | 288 | 20.760 | -77.798 | 25.573 | 1.00 | 0.00 |
| C    |       |     |     |     |        |         |        |      |      |
| ATOM | 11727 | CB  | THR | 288 | 21.563 | -76.769 | 24.695 | 1.00 | 0.00 |
| C    |       |     |     |     |        |         |        |      |      |
| ATOM | 11728 | CG2 | THR | 288 | 20.712 | -75.609 | 24.151 | 1.00 | 0.00 |
| C    |       |     |     |     |        |         |        |      |      |
| ATOM | 11729 | OG1 | THR | 288 | 22.722 | -76.175 | 25.376 | 1.00 | 0.00 |
| O    |       |     |     |     |        |         |        |      |      |
| ATOM | 11730 | C   | THR | 288 | 21.568 | -78.996 | 26.023 | 1.00 | 0.00 |
| C    |       |     |     |     |        |         |        |      |      |
| ATOM | 11731 | O   | THR | 288 | 22.103 | -79.033 | 27.112 | 1.00 | 0.00 |
| O    |       |     |     |     |        |         |        |      |      |
| ATOM | 11732 | N   | ALA | 289 | 21.760 | -79.950 | 25.141 | 1.00 | 0.00 |
| N    |       |     |     |     |        |         |        |      |      |
| ATOM | 11733 | CA  | ALA | 289 | 22.504 | -81.184 | 25.314 | 1.00 | 0.00 |
| C    |       |     |     |     |        |         |        |      |      |
| ATOM | 11734 | CB  | ALA | 289 | 21.569 | -82.278 | 25.813 | 1.00 | 0.00 |
| C    |       |     |     |     |        |         |        |      |      |
| ATOM | 11735 | C   | ALA | 289 | 23.198 | -81.659 | 24.050 | 1.00 | 0.00 |
| C    |       |     |     |     |        |         |        |      |      |

|      |       |     |     |     |        |         |        |      |      |
|------|-------|-----|-----|-----|--------|---------|--------|------|------|
| ATOM | 11736 | O   | ALA | 289 | 22.855 | -81.364 | 22.932 | 1.00 | 0.00 |
| O    |       |     |     |     |        |         |        |      |      |
| ATOM | 11737 | N   | GLU | 290 | 24.331 | -82.383 | 24.162 | 1.00 | 0.00 |
| N    |       |     |     |     |        |         |        |      |      |
| ATOM | 11738 | CA  | GLU | 290 | 25.142 | -82.812 | 23.005 | 1.00 | 0.00 |
| C    |       |     |     |     |        |         |        |      |      |
| ATOM | 11739 | CB  | GLU | 290 | 26.389 | -81.864 | 22.988 | 1.00 | 0.00 |
| C    |       |     |     |     |        |         |        |      |      |
| ATOM | 11740 | CG  | GLU | 290 | 27.399 | -82.146 | 21.884 | 1.00 | 0.00 |
| C    |       |     |     |     |        |         |        |      |      |
| ATOM | 11741 | CD  | GLU | 290 | 28.476 | -81.014 | 21.795 | 1.00 | 0.00 |
| C    |       |     |     |     |        |         |        |      |      |
| ATOM | 11742 | OE1 | GLU | 290 | 29.006 | -80.699 | 22.920 | 1.00 | 0.00 |
| O    |       |     |     |     |        |         |        |      |      |
| ATOM | 11743 | OE2 | GLU | 290 | 28.956 | -80.621 | 20.692 | 1.00 | 0.00 |
| O1-  |       |     |     |     |        |         |        |      |      |
| ATOM | 11744 | C   | GLU | 290 | 25.533 | -84.267 | 23.176 | 1.00 | 0.00 |
| C    |       |     |     |     |        |         |        |      |      |
| ATOM | 11745 | O   | GLU | 290 | 25.696 | -84.662 | 24.320 | 1.00 | 0.00 |
| O    |       |     |     |     |        |         |        |      |      |
| ATOM | 11746 | N   | ILE | 291 | 25.692 | -85.039 | 22.090 | 1.00 | 0.00 |
| N    |       |     |     |     |        |         |        |      |      |
| ATOM | 11747 | CA  | ILE | 291 | 26.022 | -86.492 | 22.105 | 1.00 | 0.00 |
| C    |       |     |     |     |        |         |        |      |      |
| ATOM | 11748 | CB  | ILE | 291 | 25.500 | -87.137 | 20.738 | 1.00 | 0.00 |
| C    |       |     |     |     |        |         |        |      |      |
| ATOM | 11749 | CG2 | ILE | 291 | 25.818 | -88.658 | 20.685 | 1.00 | 0.00 |
| C    |       |     |     |     |        |         |        |      |      |
| ATOM | 11750 | CG1 | ILE | 291 | 23.971 | -86.798 | 20.561 | 1.00 | 0.00 |
| C    |       |     |     |     |        |         |        |      |      |
| ATOM | 11751 | CD1 | ILE | 291 | 23.357 | -87.536 | 19.355 | 1.00 | 0.00 |
| C    |       |     |     |     |        |         |        |      |      |
| ATOM | 11752 | C   | ILE | 291 | 27.466 | -86.766 | 22.347 | 1.00 | 0.00 |
| C    |       |     |     |     |        |         |        |      |      |
| ATOM | 11753 | O   | ILE | 291 | 28.309 | -86.129 | 21.697 | 1.00 | 0.00 |
| O    |       |     |     |     |        |         |        |      |      |
| ATOM | 11754 | N   | TYR | 292 | 27.871 | -87.777 | 23.148 | 1.00 | 0.00 |
| N    |       |     |     |     |        |         |        |      |      |
| ATOM | 11755 | CA  | TYR | 292 | 29.230 | -88.309 | 23.217 | 1.00 | 0.00 |
| C    |       |     |     |     |        |         |        |      |      |
| ATOM | 11756 | CB  | TYR | 292 | 29.781 | -87.923 | 24.571 | 1.00 | 0.00 |
| C    |       |     |     |     |        |         |        |      |      |
| ATOM | 11757 | CG  | TYR | 292 | 29.247 | -88.684 | 25.756 | 1.00 | 0.00 |
| C    |       |     |     |     |        |         |        |      |      |
| ATOM | 11758 | CD1 | TYR | 292 | 28.398 | -88.086 | 26.748 | 1.00 | 0.00 |
| C    |       |     |     |     |        |         |        |      |      |
| ATOM | 11759 | CE1 | TYR | 292 | 27.977 | -88.813 | 27.916 | 1.00 | 0.00 |
| C    |       |     |     |     |        |         |        |      |      |
| ATOM | 11760 | CZ  | TYR | 292 | 28.414 | -90.131 | 28.040 | 1.00 | 0.00 |
| C    |       |     |     |     |        |         |        |      |      |
| ATOM | 11761 | OH  | TYR | 292 | 28.108 | -90.760 | 29.173 | 1.00 | 0.00 |
| O    |       |     |     |     |        |         |        |      |      |
| ATOM | 11762 | CE2 | TYR | 292 | 29.188 | -90.748 | 27.061 | 1.00 | 0.00 |
| C    |       |     |     |     |        |         |        |      |      |

|      |       |     |     |     |        |          |        |      |      |
|------|-------|-----|-----|-----|--------|----------|--------|------|------|
| ATOM | 11763 | CD2 | TYR | 292 | 29.713 | -90.018  | 25.967 | 1.00 | 0.00 |
| C    |       |     |     |     |        |          |        |      |      |
| ATOM | 11764 | C   | TYR | 292 | 29.243 | -89.787  | 22.812 | 1.00 | 0.00 |
| C    |       |     |     |     |        |          |        |      |      |
| ATOM | 11765 | O   | TYR | 292 | 30.311 | -90.304  | 22.514 | 1.00 | 0.00 |
| O    |       |     |     |     |        |          |        |      |      |
| ATOM | 11766 | N   | ALA | 293 | 28.096 | -90.494  | 22.682 | 1.00 | 0.00 |
| N    |       |     |     |     |        |          |        |      |      |
| ATOM | 11767 | CA  | ALA | 293 | 28.074 | -91.862  | 22.172 | 1.00 | 0.00 |
| C    |       |     |     |     |        |          |        |      |      |
| ATOM | 11768 | CB  | ALA | 293 | 28.223 | -92.821  | 23.321 | 1.00 | 0.00 |
| C    |       |     |     |     |        |          |        |      |      |
| ATOM | 11769 | C   | ALA | 293 | 26.852 | -92.303  | 21.336 | 1.00 | 0.00 |
| C    |       |     |     |     |        |          |        |      |      |
| ATOM | 11770 | O   | ALA | 293 | 25.699 | -91.811  | 21.598 | 1.00 | 0.00 |
| O    |       |     |     |     |        |          |        |      |      |
| ATOM | 11771 | N   | TYR | 294 | 26.962 | -93.086  | 20.299 | 1.00 | 0.00 |
| N    |       |     |     |     |        |          |        |      |      |
| ATOM | 11772 | CA  | TYR | 294 | 25.881 | -93.572  | 19.434 | 1.00 | 0.00 |
| C    |       |     |     |     |        |          |        |      |      |
| ATOM | 11773 | CB  | TYR | 294 | 25.633 | -92.583  | 18.273 | 1.00 | 0.00 |
| C    |       |     |     |     |        |          |        |      |      |
| ATOM | 11774 | CG  | TYR | 294 | 24.630 | -93.044  | 17.210 | 1.00 | 0.00 |
| C    |       |     |     |     |        |          |        |      |      |
| ATOM | 11775 | CD1 | TYR | 294 | 23.480 | -92.254  | 17.021 | 1.00 | 0.00 |
| C    |       |     |     |     |        |          |        |      |      |
| ATOM | 11776 | CE1 | TYR | 294 | 22.498 | -92.520  | 16.057 | 1.00 | 0.00 |
| C    |       |     |     |     |        |          |        |      |      |
| ATOM | 11777 | CZ  | TYR | 294 | 22.676 | -93.708  | 15.300 | 1.00 | 0.00 |
| C    |       |     |     |     |        |          |        |      |      |
| ATOM | 11778 | OH  | TYR | 294 | 21.767 | -94.117  | 14.370 | 1.00 | 0.00 |
| O    |       |     |     |     |        |          |        |      |      |
| ATOM | 11779 | CE2 | TYR | 294 | 23.850 | -94.490  | 15.427 | 1.00 | 0.00 |
| C    |       |     |     |     |        |          |        |      |      |
| ATOM | 11780 | CD2 | TYR | 294 | 24.867 | -94.156  | 16.320 | 1.00 | 0.00 |
| C    |       |     |     |     |        |          |        |      |      |
| ATOM | 11781 | C   | TYR | 294 | 26.172 | -94.973  | 18.890 | 1.00 | 0.00 |
| C    |       |     |     |     |        |          |        |      |      |
| ATOM | 11782 | O   | TYR | 294 | 27.367 | -95.229  | 18.450 | 1.00 | 0.00 |
| O    |       |     |     |     |        |          |        |      |      |
| ATOM | 11783 | N   | ARG | 295 | 25.166 | -95.947  | 18.906 | 1.00 | 0.00 |
| N    |       |     |     |     |        |          |        |      |      |
| ATOM | 11784 | CA  | ARG | 295 | 25.236 | -97.278  | 18.306 | 1.00 | 0.00 |
| C    |       |     |     |     |        |          |        |      |      |
| ATOM | 11785 | CB  | ARG | 295 | 25.936 | -98.196  | 19.285 | 1.00 | 0.00 |
| C    |       |     |     |     |        |          |        |      |      |
| ATOM | 11786 | CG  | ARG | 295 | 26.108 | -99.593  | 18.665 | 1.00 | 0.00 |
| C    |       |     |     |     |        |          |        |      |      |
| ATOM | 11787 | CD  | ARG | 295 | 27.330 | -100.290 | 19.282 | 1.00 | 0.00 |
| C    |       |     |     |     |        |          |        |      |      |
| ATOM | 11788 | NE  | ARG | 295 | 27.378 | -101.745 | 19.098 | 1.00 | 0.00 |
| N    |       |     |     |     |        |          |        |      |      |
| ATOM | 11789 | CZ  | ARG | 295 | 28.425 | -102.500 | 18.773 | 1.00 | 0.00 |
| C    |       |     |     |     |        |          |        |      |      |



|      |       |     |     |     |        |          |        |      |      |
|------|-------|-----|-----|-----|--------|----------|--------|------|------|
| ATOM | 11790 | NH1 | ARG | 295 | 28.226 | -103.734 | 18.453 | 1.00 | 0.00 |
| N    |       |     |     |     |        |          |        |      |      |
| ATOM | 11791 | NH2 | ARG | 295 | 29.643 | -102.123 | 18.752 | 1.00 | 0.00 |
| N1+  |       |     |     |     |        |          |        |      |      |
| ATOM | 11792 | C   | ARG | 295 | 23.808 | -97.751  | 18.020 | 1.00 | 0.00 |
| C    |       |     |     |     |        |          |        |      |      |
| ATOM | 11793 | O   | ARG | 295 | 23.031 | -97.834  | 18.963 | 1.00 | 0.00 |
| O    |       |     |     |     |        |          |        |      |      |
| ATOM | 11794 | N   | GLU | 296 | 23.606 | -98.131  | 16.832 | 1.00 | 0.00 |
| N    |       |     |     |     |        |          |        |      |      |
| ATOM | 11795 | CA  | GLU | 296 | 22.410 | -98.789  | 16.328 | 1.00 | 0.00 |
| C    |       |     |     |     |        |          |        |      |      |
| ATOM | 11796 | CB  | GLU | 296 | 21.892 | -98.169  | 15.063 | 1.00 | 0.00 |
| C    |       |     |     |     |        |          |        |      |      |
| ATOM | 11797 | CG  | GLU | 296 | 22.735 | -98.324  | 13.882 | 1.00 | 0.00 |
| C    |       |     |     |     |        |          |        |      |      |
| ATOM | 11798 | CD  | GLU | 296 | 22.425 | -97.438  | 12.733 | 1.00 | 0.00 |
| C    |       |     |     |     |        |          |        |      |      |
| ATOM | 11799 | OE1 | GLU | 296 | 22.163 | -96.217  | 12.897 | 1.00 | 0.00 |
| O    |       |     |     |     |        |          |        |      |      |
| ATOM | 11800 | OE2 | GLU | 296 | 22.494 | -97.930  | 11.580 | 1.00 | 0.00 |
| O1-  |       |     |     |     |        |          |        |      |      |
| ATOM | 11801 | C   | GLU | 296 | 22.594 | -100.268 | 16.335 | 1.00 | 0.00 |
| C    |       |     |     |     |        |          |        |      |      |
| ATOM | 11802 | O   | GLU | 296 | 23.587 | -100.735 | 15.717 | 1.00 | 0.00 |
| O    |       |     |     |     |        |          |        |      |      |
| ATOM | 11803 | N   | GLU | 297 | 21.795 | -101.088 | 17.065 | 1.00 | 0.00 |
| N    |       |     |     |     |        |          |        |      |      |
| ATOM | 11804 | CA  | GLU | 297 | 22.212 | -102.353 | 17.605 | 1.00 | 0.00 |
| C    |       |     |     |     |        |          |        |      |      |
| ATOM | 11805 | CB  | GLU | 297 | 22.642 | -102.011 | 19.067 | 1.00 | 0.00 |
| C    |       |     |     |     |        |          |        |      |      |
| ATOM | 11806 | CG  | GLU | 297 | 22.988 | -103.267 | 19.878 | 1.00 | 0.00 |
| C    |       |     |     |     |        |          |        |      |      |
| ATOM | 11807 | CD  | GLU | 297 | 24.177 | -104.146 | 19.423 | 1.00 | 0.00 |
| C    |       |     |     |     |        |          |        |      |      |
| ATOM | 11808 | OE1 | GLU | 297 | 24.171 | -105.362 | 19.659 | 1.00 | 0.00 |
| O    |       |     |     |     |        |          |        |      |      |
| ATOM | 11809 | OE2 | GLU | 297 | 25.109 | -103.632 | 18.754 | 1.00 | 0.00 |
| O1-  |       |     |     |     |        |          |        |      |      |
| ATOM | 11810 | C   | GLU | 297 | 21.075 | -103.314 | 17.672 | 1.00 | 0.00 |
| C    |       |     |     |     |        |          |        |      |      |
| ATOM | 11811 | O   | GLU | 297 | 20.000 | -103.007 | 18.080 | 1.00 | 0.00 |
| O    |       |     |     |     |        |          |        |      |      |
| ATOM | 11812 | N   | GLN | 298 | 21.279 | -104.552 | 17.203 | 1.00 | 0.00 |
| N    |       |     |     |     |        |          |        |      |      |
| ATOM | 11813 | CA  | GLN | 298 | 20.312 | -105.490 | 16.928 | 1.00 | 0.00 |
| C    |       |     |     |     |        |          |        |      |      |
| ATOM | 11814 | CB  | GLN | 298 | 20.846 | -106.694 | 16.092 | 1.00 | 0.00 |
| C    |       |     |     |     |        |          |        |      |      |
| ATOM | 11815 | CG  | GLN | 298 | 21.782 | -107.680 | 16.873 | 1.00 | 0.00 |
| C    |       |     |     |     |        |          |        |      |      |
| ATOM | 11816 | CD  | GLN | 298 | 22.617 | -108.508 | 15.934 | 1.00 | 0.00 |
| C    |       |     |     |     |        |          |        |      |      |

|      |       |     |     |     |                |        |      |      |
|------|-------|-----|-----|-----|----------------|--------|------|------|
| ATOM | 11817 | OE1 | GLN | 298 | 22.153-108.997 | 14.950 | 1.00 | 0.00 |
| O    |       |     |     |     |                |        |      |      |
| ATOM | 11818 | NE2 | GLN | 298 | 23.839-108.755 | 16.222 | 1.00 | 0.00 |
| N    |       |     |     |     |                |        |      |      |
| ATOM | 11819 | C   | GLN | 298 | 19.495-105.956 | 18.153 | 1.00 | 0.00 |
| C    |       |     |     |     |                |        |      |      |
| ATOM | 11820 | O   | GLN | 298 | 18.985-107.080 | 18.095 | 1.00 | 0.00 |
| O    |       |     |     |     |                |        |      |      |
| ATOM | 11821 | N   | ASP | 299 | 19.381-105.276 | 19.293 | 1.00 | 0.00 |
| N    |       |     |     |     |                |        |      |      |
| ATOM | 11822 | CA  | ASP | 299 | 18.989-105.774 | 20.633 | 1.00 | 0.00 |
| C    |       |     |     |     |                |        |      |      |
| ATOM | 11823 | CB  | ASP | 299 | 18.909-104.561 | 21.560 | 1.00 | 0.00 |
| C    |       |     |     |     |                |        |      |      |
| ATOM | 11824 | CG  | ASP | 299 | 18.706-104.843 | 23.039 | 1.00 | 0.00 |
| C    |       |     |     |     |                |        |      |      |
| ATOM | 11825 | OD1 | ASP | 299 | 18.477-103.812 | 23.736 | 1.00 | 0.00 |
| O    |       |     |     |     |                |        |      |      |
| ATOM | 11826 | OD2 | ASP | 299 | 18.791-106.037 | 23.428 | 1.00 | 0.00 |
| O1-  |       |     |     |     |                |        |      |      |
| ATOM | 11827 | C   | ASP | 299 | 17.606-106.512 | 20.661 | 1.00 | 0.00 |
| C    |       |     |     |     |                |        |      |      |
| ATOM | 11828 | O   | ASP | 299 | 17.369-107.520 | 21.331 | 1.00 | 0.00 |
| O    |       |     |     |     |                |        |      |      |
| ATOM | 11829 | N   | PHE | 300 | 16.621-106.102 | 19.875 | 1.00 | 0.00 |
| N    |       |     |     |     |                |        |      |      |
| ATOM | 11830 | CA  | PHE | 300 | 15.252-106.696 | 19.728 | 1.00 | 0.00 |
| C    |       |     |     |     |                |        |      |      |
| ATOM | 11831 | CB  | PHE | 300 | 14.245-105.613 | 19.304 | 1.00 | 0.00 |
| C    |       |     |     |     |                |        |      |      |
| ATOM | 11832 | CG  | PHE | 300 | 13.851-104.568 | 20.330 | 1.00 | 0.00 |
| C    |       |     |     |     |                |        |      |      |
| ATOM | 11833 | CD1 | PHE | 300 | 12.709-103.789 | 20.079 | 1.00 | 0.00 |
| C    |       |     |     |     |                |        |      |      |
| ATOM | 11834 | CE1 | PHE | 300 | 12.282-102.821 | 20.991 | 1.00 | 0.00 |
| C    |       |     |     |     |                |        |      |      |
| ATOM | 11835 | CZ  | PHE | 300 | 12.994-102.610 | 22.168 | 1.00 | 0.00 |
| C    |       |     |     |     |                |        |      |      |
| ATOM | 11836 | CE2 | PHE | 300 | 14.138-103.359 | 22.422 | 1.00 | 0.00 |
| C    |       |     |     |     |                |        |      |      |
| ATOM | 11837 | CD2 | PHE | 300 | 14.567-104.322 | 21.507 | 1.00 | 0.00 |
| C    |       |     |     |     |                |        |      |      |
| ATOM | 11838 | C   | PHE | 300 | 15.233-107.876 | 18.753 | 1.00 | 0.00 |
| C    |       |     |     |     |                |        |      |      |
| ATOM | 11839 | O   | PHE | 300 | 14.229-108.581 | 18.728 | 1.00 | 0.00 |
| O    |       |     |     |     |                |        |      |      |
| ATOM | 11840 | N   | GLY | 301 | 16.300-108.230 | 18.018 | 1.00 | 0.00 |
| N    |       |     |     |     |                |        |      |      |
| ATOM | 11841 | CA  | GLY | 301 | 16.104-108.846 | 16.725 | 1.00 | 0.00 |
| C    |       |     |     |     |                |        |      |      |
| ATOM | 11842 | C   | GLY | 301 | 16.037-107.974 | 15.491 | 1.00 | 0.00 |
| C    |       |     |     |     |                |        |      |      |
| ATOM | 11843 | O   | GLY | 301 | 15.775-108.498 | 14.410 | 1.00 | 0.00 |
| O    |       |     |     |     |                |        |      |      |

|      |       |     |     |     |                |        |      |      |
|------|-------|-----|-----|-----|----------------|--------|------|------|
| ATOM | 11844 | N   | ILE | 302 | 16.341-106.679 | 15.656 | 1.00 | 0.00 |
| N    |       |     |     |     |                |        |      |      |
| ATOM | 11845 | CA  | ILE | 302 | 16.231-105.484 | 14.775 | 1.00 | 0.00 |
| C    |       |     |     |     |                |        |      |      |
| ATOM | 11846 | CB  | ILE | 302 | 14.766-105.142 | 14.440 | 1.00 | 0.00 |
| C    |       |     |     |     |                |        |      |      |
| ATOM | 11847 | CG2 | ILE | 302 | 13.927-104.845 | 15.686 | 1.00 | 0.00 |
| C    |       |     |     |     |                |        |      |      |
| ATOM | 11848 | CG1 | ILE | 302 | 14.628-103.992 | 13.423 | 1.00 | 0.00 |
| C    |       |     |     |     |                |        |      |      |
| ATOM | 11849 | CD1 | ILE | 302 | 15.089-104.378 | 12.024 | 1.00 | 0.00 |
| C    |       |     |     |     |                |        |      |      |
| ATOM | 11850 | C   | ILE | 302 | 16.989-104.398 | 15.430 | 1.00 | 0.00 |
| C    |       |     |     |     |                |        |      |      |
| ATOM | 11851 | O   | ILE | 302 | 17.112-104.354 | 16.695 | 1.00 | 0.00 |
| O    |       |     |     |     |                |        |      |      |
| ATOM | 11852 | N   | GLU | 303 | 17.663-103.478 | 14.729 | 1.00 | 0.00 |
| N    |       |     |     |     |                |        |      |      |
| ATOM | 11853 | CA  | GLU | 303 | 18.559-102.491 | 15.225 | 1.00 | 0.00 |
| C    |       |     |     |     |                |        |      |      |
| ATOM | 11854 | CB  | GLU | 303 | 19.433-102.017 | 13.979 | 1.00 | 0.00 |
| C    |       |     |     |     |                |        |      |      |
| ATOM | 11855 | CG  | GLU | 303 | 20.286-103.116 | 13.434 | 1.00 | 0.00 |
| C    |       |     |     |     |                |        |      |      |
| ATOM | 11856 | CD  | GLU | 303 | 19.571-104.186 | 12.667 | 1.00 | 0.00 |
| C    |       |     |     |     |                |        |      |      |
| ATOM | 11857 | OE1 | GLU | 303 | 20.200-105.279 | 12.503 | 1.00 | 0.00 |
| O    |       |     |     |     |                |        |      |      |
| ATOM | 11858 | OE2 | GLU | 303 | 18.458-104.106 | 12.198 | 1.00 | 0.00 |
| O1-  |       |     |     |     |                |        |      |      |
| ATOM | 11859 | C   | GLU | 303 | 17.854-101.323 | 15.904 | 1.00 | 0.00 |
| C    |       |     |     |     |                |        |      |      |
| ATOM | 11860 | O   | GLU | 303 | 17.182-100.472 | 15.253 | 1.00 | 0.00 |
| O    |       |     |     |     |                |        |      |      |
| ATOM | 11861 | N   | ILE | 304 | 18.006-101.224 | 17.216 | 1.00 | 0.00 |
| N    |       |     |     |     |                |        |      |      |
| ATOM | 11862 | CA  | ILE | 304 | 17.479-100.090 | 17.962 | 1.00 | 0.00 |
| C    |       |     |     |     |                |        |      |      |
| ATOM | 11863 | CB  | ILE | 304 | 16.789-100.520 | 19.265 | 1.00 | 0.00 |
| C    |       |     |     |     |                |        |      |      |
| ATOM | 11864 | CG2 | ILE | 304 | 17.765-101.050 | 20.322 | 1.00 | 0.00 |
| C    |       |     |     |     |                |        |      |      |
| ATOM | 11865 | CG1 | ILE | 304 | 15.937 -99.371 | 19.837 | 1.00 | 0.00 |
| C    |       |     |     |     |                |        |      |      |
| ATOM | 11866 | CD1 | ILE | 304 | 14.761 -99.899 | 20.644 | 1.00 | 0.00 |
| C    |       |     |     |     |                |        |      |      |
| ATOM | 11867 | C   | ILE | 304 | 18.614 -98.985 | 18.141 | 1.00 | 0.00 |
| C    |       |     |     |     |                |        |      |      |
| ATOM | 11868 | O   | ILE | 304 | 19.740 -99.423 | 18.393 | 1.00 | 0.00 |
| O    |       |     |     |     |                |        |      |      |
| ATOM | 11869 | N   | VAL | 305 | 18.323 -97.696 | 18.072 | 1.00 | 0.00 |
| N    |       |     |     |     |                |        |      |      |
| ATOM | 11870 | CA  | VAL | 305 | 19.353 -96.647 | 18.300 | 1.00 | 0.00 |
| C    |       |     |     |     |                |        |      |      |

|      |       |     |     |     |        |          |        |      |      |
|------|-------|-----|-----|-----|--------|----------|--------|------|------|
| ATOM | 11871 | CB  | VAL | 305 | 19.187 | -95.350  | 17.367 | 1.00 | 0.00 |
| C    |       |     |     |     |        |          |        |      |      |
| ATOM | 11872 | CG1 | VAL | 305 | 20.394 | -94.483  | 17.590 | 1.00 | 0.00 |
| C    |       |     |     |     |        |          |        |      |      |
| ATOM | 11873 | CG2 | VAL | 305 | 19.086 | -95.657  | 15.906 | 1.00 | 0.00 |
| C    |       |     |     |     |        |          |        |      |      |
| ATOM | 11874 | C   | VAL | 305 | 19.542 | -96.302  | 19.786 | 1.00 | 0.00 |
| C    |       |     |     |     |        |          |        |      |      |
| ATOM | 11875 | O   | VAL | 305 | 18.717 | -95.666  | 20.356 | 1.00 | 0.00 |
| O    |       |     |     |     |        |          |        |      |      |
| ATOM | 11876 | N   | LYS | 306 | 20.667 | -96.649  | 20.398 | 1.00 | 0.00 |
| N    |       |     |     |     |        |          |        |      |      |
| ATOM | 11877 | CA  | LYS | 306 | 21.103 | -96.281  | 21.685 | 1.00 | 0.00 |
| C    |       |     |     |     |        |          |        |      |      |
| ATOM | 11878 | CB  | LYS | 306 | 21.702 | -97.486  | 22.428 | 1.00 | 0.00 |
| C    |       |     |     |     |        |          |        |      |      |
| ATOM | 11879 | CG  | LYS | 306 | 20.765 | -98.701  | 22.408 | 1.00 | 0.00 |
| C    |       |     |     |     |        |          |        |      |      |
| ATOM | 11880 | CD  | LYS | 306 | 21.261 | -99.843  | 23.291 | 1.00 | 0.00 |
| C    |       |     |     |     |        |          |        |      |      |
| ATOM | 11881 | CE  | LYS | 306 | 20.271 | -100.996 | 23.253 | 1.00 | 0.00 |
| C    |       |     |     |     |        |          |        |      |      |
| ATOM | 11882 | NZ  | LYS | 306 | 20.673 | -102.028 | 24.231 | 1.00 | 0.00 |
| N1+  |       |     |     |     |        |          |        |      |      |
| ATOM | 11883 | C   | LYS | 306 | 22.103 | -95.141  | 21.632 | 1.00 | 0.00 |
| C    |       |     |     |     |        |          |        |      |      |
| ATOM | 11884 | O   | LYS | 306 | 23.058 | -95.235  | 20.858 | 1.00 | 0.00 |
| O    |       |     |     |     |        |          |        |      |      |
| ATOM | 11885 | N   | VAL | 307 | 21.997 | -94.077  | 22.423 | 1.00 | 0.00 |
| N    |       |     |     |     |        |          |        |      |      |
| ATOM | 11886 | CA  | VAL | 307 | 22.811 | -92.830  | 22.476 | 1.00 | 0.00 |
| C    |       |     |     |     |        |          |        |      |      |
| ATOM | 11887 | CB  | VAL | 307 | 22.018 | -91.603  | 21.854 | 1.00 | 0.00 |
| C    |       |     |     |     |        |          |        |      |      |
| ATOM | 11888 | CG1 | VAL | 307 | 22.663 | -90.273  | 21.891 | 1.00 | 0.00 |
| C    |       |     |     |     |        |          |        |      |      |
| ATOM | 11889 | CG2 | VAL | 307 | 21.632 | -91.774  | 20.364 | 1.00 | 0.00 |
| C    |       |     |     |     |        |          |        |      |      |
| ATOM | 11890 | C   | VAL | 307 | 23.192 | -92.593  | 23.953 | 1.00 | 0.00 |
| C    |       |     |     |     |        |          |        |      |      |
| ATOM | 11891 | O   | VAL | 307 | 22.472 | -92.928  | 24.890 | 1.00 | 0.00 |
| O    |       |     |     |     |        |          |        |      |      |
| ATOM | 11892 | N   | LYS | 308 | 24.305 | -91.901  | 24.196 | 1.00 | 0.00 |
| N    |       |     |     |     |        |          |        |      |      |
| ATOM | 11893 | CA  | LYS | 308 | 24.589 | -91.168  | 25.437 | 1.00 | 0.00 |
| C    |       |     |     |     |        |          |        |      |      |
| ATOM | 11894 | CB  | LYS | 308 | 25.765 | -91.889  | 26.099 | 1.00 | 0.00 |
| C    |       |     |     |     |        |          |        |      |      |
| ATOM | 11895 | CG  | LYS | 308 | 25.619 | -93.364  | 26.441 | 1.00 | 0.00 |
| C    |       |     |     |     |        |          |        |      |      |
| ATOM | 11896 | CD  | LYS | 308 | 26.757 | -94.073  | 27.230 | 1.00 | 0.00 |
| C    |       |     |     |     |        |          |        |      |      |
| ATOM | 11897 | CE  | LYS | 308 | 26.405 | -95.541  | 27.394 | 1.00 | 0.00 |
| C    |       |     |     |     |        |          |        |      |      |

|      |       |     |     |     |        |         |        |      |      |
|------|-------|-----|-----|-----|--------|---------|--------|------|------|
| ATOM | 11898 | NZ  | LYS | 308 | 27.651 | -96.378 | 27.603 | 1.00 | 0.00 |
| N1+  |       |     |     |     |        |         |        |      |      |
| ATOM | 11899 | C   | LYS | 308 | 24.890 | -89.665 | 25.144 | 1.00 | 0.00 |
| C    |       |     |     |     |        |         |        |      |      |
| ATOM | 11900 | O   | LYS | 308 | 25.479 | -89.356 | 24.142 | 1.00 | 0.00 |
| O    |       |     |     |     |        |         |        |      |      |
| ATOM | 11901 | N   | ALA | 309 | 24.337 | -88.714 | 25.930 | 1.00 | 0.00 |
| N    |       |     |     |     |        |         |        |      |      |
| ATOM | 11902 | CA  | ALA | 309 | 24.614 | -87.271 | 25.763 | 1.00 | 0.00 |
| C    |       |     |     |     |        |         |        |      |      |
| ATOM | 11903 | CB  | ALA | 309 | 23.333 | -86.638 | 25.132 | 1.00 | 0.00 |
| C    |       |     |     |     |        |         |        |      |      |
| ATOM | 11904 | C   | ALA | 309 | 24.856 | -86.677 | 27.161 | 1.00 | 0.00 |
| C    |       |     |     |     |        |         |        |      |      |
| ATOM | 11905 | O   | ALA | 309 | 24.837 | -87.362 | 28.187 | 1.00 | 0.00 |
| O    |       |     |     |     |        |         |        |      |      |
| ATOM | 11906 | N   | ILE | 310 | 25.165 | -85.417 | 27.133 | 1.00 | 0.00 |
| N    |       |     |     |     |        |         |        |      |      |
| ATOM | 11907 | CA  | ILE | 310 | 25.474 | -84.666 | 28.380 | 1.00 | 0.00 |
| C    |       |     |     |     |        |         |        |      |      |
| ATOM | 11908 | CB  | ILE | 310 | 27.007 | -84.698 | 28.783 | 1.00 | 0.00 |
| C    |       |     |     |     |        |         |        |      |      |
| ATOM | 11909 | CG2 | ILE | 310 | 27.909 | -83.883 | 27.890 | 1.00 | 0.00 |
| C    |       |     |     |     |        |         |        |      |      |
| ATOM | 11910 | CG1 | ILE | 310 | 27.160 | -84.261 | 30.232 | 1.00 | 0.00 |
| C    |       |     |     |     |        |         |        |      |      |
| ATOM | 11911 | CD1 | ILE | 310 | 28.525 | -84.650 | 30.771 | 1.00 | 0.00 |
| C    |       |     |     |     |        |         |        |      |      |
| ATOM | 11912 | C   | ILE | 310 | 24.869 | -83.244 | 28.249 | 1.00 | 0.00 |
| C    |       |     |     |     |        |         |        |      |      |
| ATOM | 11913 | O   | ILE | 310 | 24.737 | -82.772 | 27.088 | 1.00 | 0.00 |
| O    |       |     |     |     |        |         |        |      |      |
| ATOM | 11914 | N   | GLY | 311 | 24.533 | -82.612 | 29.344 | 1.00 | 0.00 |
| N    |       |     |     |     |        |         |        |      |      |
| ATOM | 11915 | CA  | GLY | 311 | 23.887 | -81.367 | 29.240 | 1.00 | 0.00 |
| C    |       |     |     |     |        |         |        |      |      |
| ATOM | 11916 | C   | GLY | 311 | 24.853 | -80.213 | 29.083 | 1.00 | 0.00 |
| C    |       |     |     |     |        |         |        |      |      |
| ATOM | 11917 | O   | GLY | 311 | 25.978 | -80.268 | 29.727 | 1.00 | 0.00 |
| O    |       |     |     |     |        |         |        |      |      |
| ATOM | 11918 | N   | ARG | 312 | 24.563 | -79.131 | 28.343 | 1.00 | 0.00 |
| N    |       |     |     |     |        |         |        |      |      |
| ATOM | 11919 | CA  | ARG | 312 | 25.436 | -77.971 | 28.004 | 1.00 | 0.00 |
| C    |       |     |     |     |        |         |        |      |      |
| ATOM | 11920 | CB  | ARG | 312 | 25.617 | -77.932 | 26.458 | 1.00 | 0.00 |
| C    |       |     |     |     |        |         |        |      |      |
| ATOM | 11921 | CG  | ARG | 312 | 26.463 | -79.111 | 25.823 | 1.00 | 0.00 |
| C    |       |     |     |     |        |         |        |      |      |
| ATOM | 11922 | CD  | ARG | 312 | 27.829 | -79.313 | 26.435 | 1.00 | 0.00 |
| C    |       |     |     |     |        |         |        |      |      |
| ATOM | 11923 | NE  | ARG | 312 | 28.513 | -80.395 | 25.708 | 1.00 | 0.00 |
| N    |       |     |     |     |        |         |        |      |      |
| ATOM | 11924 | CZ  | ARG | 312 | 29.524 | -81.102 | 26.142 | 1.00 | 0.00 |
| C    |       |     |     |     |        |         |        |      |      |

|      |       |     |     |     |        |         |        |      |      |
|------|-------|-----|-----|-----|--------|---------|--------|------|------|
| ATOM | 11925 | NH1 | ARG | 312 | 29.927 | -81.273 | 27.346 | 1.00 | 0.00 |
| N    |       |     |     |     |        |         |        |      |      |
| ATOM | 11926 | NH2 | ARG | 312 | 30.282 | -81.601 | 25.189 | 1.00 | 0.00 |
| N1+  |       |     |     |     |        |         |        |      |      |
| ATOM | 11927 | C   | ARG | 312 | 25.009 | -76.609 | 28.605 | 1.00 | 0.00 |
| C    |       |     |     |     |        |         |        |      |      |
| ATOM | 11928 | O   | ARG | 312 | 25.570 | -76.366 | 29.714 | 1.00 | 0.00 |
| O    |       |     |     |     |        |         |        |      |      |
| ATOM | 11929 | N   | GLN | 313 | 23.966 | -75.904 | 28.115 | 1.00 | 0.00 |
| N    |       |     |     |     |        |         |        |      |      |
| ATOM | 11930 | CA  | GLN | 313 | 23.550 | -74.519 | 28.533 | 1.00 | 0.00 |
| C    |       |     |     |     |        |         |        |      |      |
| ATOM | 11931 | CB  | GLN | 313 | 24.129 | -73.458 | 27.494 | 1.00 | 0.00 |
| C    |       |     |     |     |        |         |        |      |      |
| ATOM | 11932 | CG  | GLN | 313 | 25.480 | -73.796 | 26.768 | 1.00 | 0.00 |
| C    |       |     |     |     |        |         |        |      |      |
| ATOM | 11933 | CD  | GLN | 313 | 26.075 | -72.835 | 25.798 | 1.00 | 0.00 |
| C    |       |     |     |     |        |         |        |      |      |
| ATOM | 11934 | OE1 | GLN | 313 | 26.068 | -73.187 | 24.620 | 1.00 | 0.00 |
| O    |       |     |     |     |        |         |        |      |      |
| ATOM | 11935 | NE2 | GLN | 313 | 26.513 | -71.693 | 26.269 | 1.00 | 0.00 |
| N    |       |     |     |     |        |         |        |      |      |
| ATOM | 11936 | C   | GLN | 313 | 22.049 | -74.335 | 28.726 | 1.00 | 0.00 |
| C    |       |     |     |     |        |         |        |      |      |
| ATOM | 11937 | O   | GLN | 313 | 21.218 | -75.064 | 28.259 | 1.00 | 0.00 |
| O    |       |     |     |     |        |         |        |      |      |
| ATOM | 11938 | N   | ARG | 314 | 21.717 | -73.253 | 29.485 | 1.00 | 0.00 |
| N    |       |     |     |     |        |         |        |      |      |
| ATOM | 11939 | CA  | ARG | 314 | 20.319 | -72.790 | 29.705 | 1.00 | 0.00 |
| C    |       |     |     |     |        |         |        |      |      |
| ATOM | 11940 | CB  | ARG | 314 | 20.174 | -72.192 | 31.105 | 1.00 | 0.00 |
| C    |       |     |     |     |        |         |        |      |      |
| ATOM | 11941 | CG  | ARG | 314 | 20.448 | -73.160 | 32.247 | 1.00 | 0.00 |
| C    |       |     |     |     |        |         |        |      |      |
| ATOM | 11942 | CD  | ARG | 314 | 20.306 | -72.422 | 33.576 | 1.00 | 0.00 |
| C    |       |     |     |     |        |         |        |      |      |
| ATOM | 11943 | NE  | ARG | 314 | 21.249 | -71.258 | 33.658 | 1.00 | 0.00 |
| N    |       |     |     |     |        |         |        |      |      |
| ATOM | 11944 | CZ  | ARG | 314 | 20.895 | -69.974 | 33.762 | 1.00 | 0.00 |
| C    |       |     |     |     |        |         |        |      |      |
| ATOM | 11945 | NH1 | ARG | 314 | 19.687 | -69.543 | 33.875 | 1.00 | 0.00 |
| N    |       |     |     |     |        |         |        |      |      |
| ATOM | 11946 | NH2 | ARG | 314 | 21.773 | -69.051 | 33.827 | 1.00 | 0.00 |
| N1+  |       |     |     |     |        |         |        |      |      |
| ATOM | 11947 | C   | ARG | 314 | 19.725 | -71.871 | 28.648 | 1.00 | 0.00 |
| C    |       |     |     |     |        |         |        |      |      |
| ATOM | 11948 | O   | ARG | 314 | 20.504 | -71.121 | 28.016 | 1.00 | 0.00 |
| O    |       |     |     |     |        |         |        |      |      |
| ATOM | 11949 | N   | PHE | 315 | 18.396 | -71.770 | 28.552 | 1.00 | 0.00 |
| N    |       |     |     |     |        |         |        |      |      |
| ATOM | 11950 | CA  | PHE | 315 | 17.814 | -70.750 | 27.712 | 1.00 | 0.00 |
| C    |       |     |     |     |        |         |        |      |      |
| ATOM | 11951 | CB  | PHE | 315 | 17.874 | -71.161 | 26.253 | 1.00 | 0.00 |
| C    |       |     |     |     |        |         |        |      |      |

|      |       |     |     |     |        |         |        |      |      |
|------|-------|-----|-----|-----|--------|---------|--------|------|------|
| ATOM | 11952 | CG  | PHE | 315 | 17.170 | -72.470 | 25.929 | 1.00 | 0.00 |
| C    |       |     |     |     |        |         |        |      |      |
| ATOM | 11953 | CD1 | PHE | 315 | 15.809 | -72.550 | 25.887 | 1.00 | 0.00 |
| C    |       |     |     |     |        |         |        |      |      |
| ATOM | 11954 | CE1 | PHE | 315 | 15.202 | -73.790 | 25.588 | 1.00 | 0.00 |
| C    |       |     |     |     |        |         |        |      |      |
| ATOM | 11955 | CZ  | PHE | 315 | 16.003 | -74.921 | 25.440 | 1.00 | 0.00 |
| C    |       |     |     |     |        |         |        |      |      |
| ATOM | 11956 | CE2 | PHE | 315 | 17.353 | -74.843 | 25.558 | 1.00 | 0.00 |
| C    |       |     |     |     |        |         |        |      |      |
| ATOM | 11957 | CD2 | PHE | 315 | 17.940 | -73.617 | 25.828 | 1.00 | 0.00 |
| C    |       |     |     |     |        |         |        |      |      |
| ATOM | 11958 | C   | PHE | 315 | 16.368 | -70.289 | 28.141 | 1.00 | 0.00 |
| C    |       |     |     |     |        |         |        |      |      |
| ATOM | 11959 | O   | PHE | 315 | 15.600 | -70.944 | 28.860 | 1.00 | 0.00 |
| O    |       |     |     |     |        |         |        |      |      |
| ATOM | 11960 | N   | LYS | 316 | 15.991 | -69.180 | 27.468 | 1.00 | 0.00 |
| N    |       |     |     |     |        |         |        |      |      |
| ATOM | 11961 | CA  | LYS | 316 | 14.633 | -68.692 | 27.406 | 1.00 | 0.00 |
| C    |       |     |     |     |        |         |        |      |      |
| ATOM | 11962 | CB  | LYS | 316 | 14.535 | -67.190 | 27.952 | 1.00 | 0.00 |
| C    |       |     |     |     |        |         |        |      |      |
| ATOM | 11963 | CG  | LYS | 316 | 15.376 | -66.192 | 27.263 | 1.00 | 0.00 |
| C    |       |     |     |     |        |         |        |      |      |
| ATOM | 11964 | CD  | LYS | 316 | 15.216 | -64.807 | 28.011 | 1.00 | 0.00 |
| C    |       |     |     |     |        |         |        |      |      |
| ATOM | 11965 | CE  | LYS | 316 | 15.865 | -63.675 | 27.157 | 1.00 | 0.00 |
| C    |       |     |     |     |        |         |        |      |      |
| ATOM | 11966 | NZ  | LYS | 316 | 15.675 | -62.394 | 27.697 | 1.00 | 0.00 |
| N1+  |       |     |     |     |        |         |        |      |      |
| ATOM | 11967 | C   | LYS | 316 | 14.123 | -68.892 | 25.955 | 1.00 | 0.00 |
| C    |       |     |     |     |        |         |        |      |      |
| ATOM | 11968 | O   | LYS | 316 | 14.932 | -68.863 | 25.055 | 1.00 | 0.00 |
| O    |       |     |     |     |        |         |        |      |      |
| ATOM | 11969 | N   | VAL | 317 | 12.892 | -69.323 | 25.792 | 1.00 | 0.00 |
| N    |       |     |     |     |        |         |        |      |      |
| ATOM | 11970 | CA  | VAL | 317 | 12.348 | -69.708 | 24.492 | 1.00 | 0.00 |
| C    |       |     |     |     |        |         |        |      |      |
| ATOM | 11971 | CB  | VAL | 317 | 11.328 | -70.799 | 24.667 | 1.00 | 0.00 |
| C    |       |     |     |     |        |         |        |      |      |
| ATOM | 11972 | CG1 | VAL | 317 | 10.571 | -71.149 | 23.332 | 1.00 | 0.00 |
| C    |       |     |     |     |        |         |        |      |      |
| ATOM | 11973 | CG2 | VAL | 317 | 11.983 | -72.185 | 25.076 | 1.00 | 0.00 |
| C    |       |     |     |     |        |         |        |      |      |
| ATOM | 11974 | C   | VAL | 317 | 11.685 | -68.440 | 23.856 | 1.00 | 0.00 |
| C    |       |     |     |     |        |         |        |      |      |
| ATOM | 11975 | O   | VAL | 317 | 11.067 | -67.656 | 24.576 | 1.00 | 0.00 |
| O    |       |     |     |     |        |         |        |      |      |
| ATOM | 11976 | N   | LEU | 318 | 11.623 | -68.339 | 22.535 | 1.00 | 0.00 |
| N    |       |     |     |     |        |         |        |      |      |
| ATOM | 11977 | CA  | LEU | 318 | 11.073 | -67.222 | 21.792 | 1.00 | 0.00 |
| C    |       |     |     |     |        |         |        |      |      |
| ATOM | 11978 | CB  | LEU | 318 | 12.216 | -66.608 | 21.054 | 1.00 | 0.00 |
| C    |       |     |     |     |        |         |        |      |      |

|      |       |     |     |     |        |         |        |      |      |
|------|-------|-----|-----|-----|--------|---------|--------|------|------|
| ATOM | 11979 | CG  | LEU | 318 | 13.180 | -65.844 | 21.869 | 1.00 | 0.00 |
| C    |       |     |     |     |        |         |        |      |      |
| ATOM | 11980 | CD1 | LEU | 318 | 14.373 | -65.503 | 20.999 | 1.00 | 0.00 |
| C    |       |     |     |     |        |         |        |      |      |
| ATOM | 11981 | CD2 | LEU | 318 | 12.695 | -64.441 | 22.315 | 1.00 | 0.00 |
| C    |       |     |     |     |        |         |        |      |      |
| ATOM | 11982 | C   | LEU | 318 | 10.006 | -67.738 | 20.734 | 1.00 | 0.00 |
| C    |       |     |     |     |        |         |        |      |      |
| ATOM | 11983 | O   | LEU | 318 | 8.880  | -67.218 | 20.678 | 1.00 | 0.00 |
| O    |       |     |     |     |        |         |        |      |      |
| ATOM | 11984 | N   | GLU | 319 | 10.302 | -68.798 | 19.894 | 1.00 | 0.00 |
| N    |       |     |     |     |        |         |        |      |      |
| ATOM | 11985 | CA  | GLU | 319 | 9.301  | -69.368 | 18.972 | 1.00 | 0.00 |
| C    |       |     |     |     |        |         |        |      |      |
| ATOM | 11986 | CB  | GLU | 319 | 9.385  | -68.793 | 17.573 | 1.00 | 0.00 |
| C    |       |     |     |     |        |         |        |      |      |
| ATOM | 11987 | CG  | GLU | 319 | 9.032  | -67.354 | 17.582 | 1.00 | 0.00 |
| C    |       |     |     |     |        |         |        |      |      |
| ATOM | 11988 | CD  | GLU | 319 | 8.905  | -66.824 | 16.098 | 1.00 | 0.00 |
| C    |       |     |     |     |        |         |        |      |      |
| ATOM | 11989 | OE1 | GLU | 319 | 7.785  | -66.421 | 15.741 | 1.00 | 0.00 |
| O    |       |     |     |     |        |         |        |      |      |
| ATOM | 11990 | OE2 | GLU | 319 | 9.840  | -66.960 | 15.305 | 1.00 | 0.00 |
| O1-  |       |     |     |     |        |         |        |      |      |
| ATOM | 11991 | C   | GLU | 319 | 9.518  | -70.910 | 18.859 | 1.00 | 0.00 |
| C    |       |     |     |     |        |         |        |      |      |
| ATOM | 11992 | O   | GLU | 319 | 10.504 | -71.417 | 18.354 | 1.00 | 0.00 |
| O    |       |     |     |     |        |         |        |      |      |
| ATOM | 11993 | N   | LEU | 320 | 8.509  | -71.702 | 19.215 | 1.00 | 0.00 |
| N    |       |     |     |     |        |         |        |      |      |
| ATOM | 11994 | CA  | LEU | 320 | 8.525  | -73.083 | 18.909 | 1.00 | 0.00 |
| C    |       |     |     |     |        |         |        |      |      |
| ATOM | 11995 | CB  | LEU | 320 | 7.695  | -73.930 | 19.992 | 1.00 | 0.00 |
| C    |       |     |     |     |        |         |        |      |      |
| ATOM | 11996 | CG  | LEU | 320 | 8.016  | -73.645 | 21.436 | 1.00 | 0.00 |
| C    |       |     |     |     |        |         |        |      |      |
| ATOM | 11997 | CD1 | LEU | 320 | 6.907  | -74.030 | 22.402 | 1.00 | 0.00 |
| C    |       |     |     |     |        |         |        |      |      |
| ATOM | 11998 | CD2 | LEU | 320 | 9.254  | -74.414 | 21.653 | 1.00 | 0.00 |
| C    |       |     |     |     |        |         |        |      |      |
| ATOM | 11999 | C   | LEU | 320 | 7.935  | -73.246 | 17.490 | 1.00 | 0.00 |
| C    |       |     |     |     |        |         |        |      |      |
| ATOM | 12000 | O   | LEU | 320 | 7.090  | -72.411 | 17.081 | 1.00 | 0.00 |
| O    |       |     |     |     |        |         |        |      |      |
| ATOM | 12001 | N   | ARG | 321 | 8.568  | -74.071 | 16.604 | 1.00 | 0.00 |
| N    |       |     |     |     |        |         |        |      |      |
| ATOM | 12002 | CA  | ARG | 321 | 8.255  | -74.223 | 15.228 | 1.00 | 0.00 |
| C    |       |     |     |     |        |         |        |      |      |
| ATOM | 12003 | CB  | ARG | 321 | 9.300  | -73.616 | 14.384 | 1.00 | 0.00 |
| C    |       |     |     |     |        |         |        |      |      |
| ATOM | 12004 | CG  | ARG | 321 | 9.362  | -72.061 | 14.484 | 1.00 | 0.00 |
| C    |       |     |     |     |        |         |        |      |      |
| ATOM | 12005 | CD  | ARG | 321 | 10.442 | -71.559 | 13.582 | 1.00 | 0.00 |
| C    |       |     |     |     |        |         |        |      |      |



|      |       |     |     |     |        |         |        |      |      |
|------|-------|-----|-----|-----|--------|---------|--------|------|------|
| ATOM | 12006 | NE  | ARG | 321 | 10.743 | -70.155 | 13.901 | 1.00 | 0.00 |
| N    |       |     |     |     |        |         |        |      |      |
| ATOM | 12007 | CZ  | ARG | 321 | 11.689 | -69.360 | 13.421 | 1.00 | 0.00 |
| C    |       |     |     |     |        |         |        |      |      |
| ATOM | 12008 | NH1 | ARG | 321 | 11.635 | -68.091 | 13.683 | 1.00 | 0.00 |
| N    |       |     |     |     |        |         |        |      |      |
| ATOM | 12009 | NH2 | ARG | 321 | 12.733 | -69.842 | 12.795 | 1.00 | 0.00 |
| N1+  |       |     |     |     |        |         |        |      |      |
| ATOM | 12010 | C   | ARG | 321 | 8.031  | -75.681 | 14.862 | 1.00 | 0.00 |
| C    |       |     |     |     |        |         |        |      |      |
| ATOM | 12011 | O   | ARG | 321 | 8.851  | -76.579 | 15.200 | 1.00 | 0.00 |
| O    |       |     |     |     |        |         |        |      |      |
| ATOM | 12012 | N   | THR | 322 | 6.892  | -76.068 | 14.344 | 1.00 | 0.00 |
| N    |       |     |     |     |        |         |        |      |      |
| ATOM | 12013 | CA  | THR | 322 | 6.539  | -77.410 | 13.840 | 1.00 | 0.00 |
| C    |       |     |     |     |        |         |        |      |      |
| ATOM | 12014 | CB  | THR | 322 | 4.991  | -77.588 | 13.780 | 1.00 | 0.00 |
| C    |       |     |     |     |        |         |        |      |      |
| ATOM | 12015 | CG2 | THR | 322 | 4.559  | -78.863 | 13.092 | 1.00 | 0.00 |
| C    |       |     |     |     |        |         |        |      |      |
| ATOM | 12016 | OG1 | THR | 322 | 4.424  | -77.643 | 15.114 | 1.00 | 0.00 |
| O    |       |     |     |     |        |         |        |      |      |
| ATOM | 12017 | C   | THR | 322 | 7.279  | -77.569 | 12.480 | 1.00 | 0.00 |
| C    |       |     |     |     |        |         |        |      |      |
| ATOM | 12018 | O   | THR | 322 | 7.487  | -76.595 | 11.794 | 1.00 | 0.00 |
| O    |       |     |     |     |        |         |        |      |      |
| ATOM | 12019 | N   | GLN | 323 | 7.701  | -78.767 | 12.209 | 1.00 | 0.00 |
| N    |       |     |     |     |        |         |        |      |      |
| ATOM | 12020 | CA  | GLN | 323 | 8.681  | -79.038 | 11.100 | 1.00 | 0.00 |
| C    |       |     |     |     |        |         |        |      |      |
| ATOM | 12021 | CB  | GLN | 323 | 10.178 | -78.817 | 11.659 | 1.00 | 0.00 |
| C    |       |     |     |     |        |         |        |      |      |
| ATOM | 12022 | CG  | GLN | 323 | 11.399 | -79.362 | 10.897 | 1.00 | 0.00 |
| C    |       |     |     |     |        |         |        |      |      |
| ATOM | 12023 | CD  | GLN | 323 | 12.601 | -78.405 | 10.725 | 1.00 | 0.00 |
| C    |       |     |     |     |        |         |        |      |      |
| ATOM | 12024 | OE1 | GLN | 323 | 12.626 | -77.252 | 10.962 | 1.00 | 0.00 |
| O    |       |     |     |     |        |         |        |      |      |
| ATOM | 12025 | NE2 | GLN | 323 | 13.640 | -78.896 | 10.149 | 1.00 | 0.00 |
| N    |       |     |     |     |        |         |        |      |      |
| ATOM | 12026 | C   | GLN | 323 | 8.512  | -80.461 | 10.619 | 1.00 | 0.00 |
| C    |       |     |     |     |        |         |        |      |      |
| ATOM | 12027 | O   | GLN | 323 | 8.265  | -81.362 | 11.376 | 1.00 | 0.00 |
| O    |       |     |     |     |        |         |        |      |      |
| ATOM | 12028 | N   | SER | 324 | 8.616  | -80.749 | 9.285  | 1.00 | 0.00 |
| N    |       |     |     |     |        |         |        |      |      |
| ATOM | 12029 | CA  | SER | 324 | 8.389  | -82.091 | 8.649  | 1.00 | 0.00 |
| C    |       |     |     |     |        |         |        |      |      |
| ATOM | 12030 | CB  | SER | 324 | 8.161  | -81.991 | 7.179  | 1.00 | 0.00 |
| C    |       |     |     |     |        |         |        |      |      |
| ATOM | 12031 | OG  | SER | 324 | 7.133  | -81.036 | 6.998  | 1.00 | 0.00 |
| O    |       |     |     |     |        |         |        |      |      |
| ATOM | 12032 | C   | SER | 324 | 9.359  | -83.224 | 8.919  | 1.00 | 0.00 |
| C    |       |     |     |     |        |         |        |      |      |

|      |       |     |     |     |        |         |        |      |      |
|------|-------|-----|-----|-----|--------|---------|--------|------|------|
| ATOM | 12033 | O   | SER | 324 | 9.089  | -84.420 | 8.587  | 1.00 | 0.00 |
| O    |       |     |     |     |        |         |        |      |      |
| ATOM | 12034 | N   | ASP | 325 | 10.408 | -82.849 | 9.690  | 1.00 | 0.00 |
| N    |       |     |     |     |        |         |        |      |      |
| ATOM | 12035 | CA  | ASP | 325 | 11.364 | -83.901 | 10.212 | 1.00 | 0.00 |
| C    |       |     |     |     |        |         |        |      |      |
| ATOM | 12036 | CB  | ASP | 325 | 12.655 | -83.221 | 10.637 | 1.00 | 0.00 |
| C    |       |     |     |     |        |         |        |      |      |
| ATOM | 12037 | CG  | ASP | 325 | 13.418 | -82.584 | 9.493  | 1.00 | 0.00 |
| C    |       |     |     |     |        |         |        |      |      |
| ATOM | 12038 | OD1 | ASP | 325 | 14.021 | -81.511 | 9.606  | 1.00 | 0.00 |
| O    |       |     |     |     |        |         |        |      |      |
| ATOM | 12039 | OD2 | ASP | 325 | 13.501 | -83.204 | 8.418  | 1.00 | 0.00 |
| O1-  |       |     |     |     |        |         |        |      |      |
| ATOM | 12040 | C   | ASP | 325 | 10.674 | -84.701 | 11.401 | 1.00 | 0.00 |
| C    |       |     |     |     |        |         |        |      |      |
| ATOM | 12041 | O   | ASP | 325 | 11.318 | -85.521 | 12.036 | 1.00 | 0.00 |
| O    |       |     |     |     |        |         |        |      |      |
| ATOM | 12042 | N   | GLY | 326 | 9.377  | -84.471 | 11.621 | 1.00 | 0.00 |
| N    |       |     |     |     |        |         |        |      |      |
| ATOM | 12043 | CA  | GLY | 326 | 8.520  | -85.091 | 12.643 | 1.00 | 0.00 |
| C    |       |     |     |     |        |         |        |      |      |
| ATOM | 12044 | C   | GLY | 326 | 8.738  | -84.247 | 13.887 | 1.00 | 0.00 |
| C    |       |     |     |     |        |         |        |      |      |
| ATOM | 12045 | O   | GLY | 326 | 7.755  | -83.934 | 14.556 | 1.00 | 0.00 |
| O    |       |     |     |     |        |         |        |      |      |
| ATOM | 12046 | N   | ILE | 327 | 9.994  | -84.018 | 14.161 | 1.00 | 0.00 |
| N    |       |     |     |     |        |         |        |      |      |
| ATOM | 12047 | CA  | ILE | 327 | 10.431 | -83.230 | 15.302 | 1.00 | 0.00 |
| C    |       |     |     |     |        |         |        |      |      |
| ATOM | 12048 | CB  | ILE | 327 | 11.995 | -83.513 | 15.459 | 1.00 | 0.00 |
| C    |       |     |     |     |        |         |        |      |      |
| ATOM | 12049 | CG2 | ILE | 327 | 12.949 | -82.435 | 16.099 | 1.00 | 0.00 |
| C    |       |     |     |     |        |         |        |      |      |
| ATOM | 12050 | CG1 | ILE | 327 | 12.066 | -84.817 | 16.321 | 1.00 | 0.00 |
| C    |       |     |     |     |        |         |        |      |      |
| ATOM | 12051 | CD1 | ILE | 327 | 12.049 | -86.123 | 15.570 | 1.00 | 0.00 |
| C    |       |     |     |     |        |         |        |      |      |
| ATOM | 12052 | C   | ILE | 327 | 10.163 | -81.676 | 15.258 | 1.00 | 0.00 |
| C    |       |     |     |     |        |         |        |      |      |
| ATOM | 12053 | O   | ILE | 327 | 10.160 | -81.005 | 14.195 | 1.00 | 0.00 |
| O    |       |     |     |     |        |         |        |      |      |
| ATOM | 12054 | N   | GLN | 328 | 9.901  | -81.133 | 16.422 | 1.00 | 0.00 |
| N    |       |     |     |     |        |         |        |      |      |
| ATOM | 12055 | CA  | GLN | 328 | 9.882  | -79.682 | 16.585 | 1.00 | 0.00 |
| C    |       |     |     |     |        |         |        |      |      |
| ATOM | 12056 | CB  | GLN | 328 | 9.068  | -79.400 | 17.841 | 1.00 | 0.00 |
| C    |       |     |     |     |        |         |        |      |      |
| ATOM | 12057 | CG  | GLN | 328 | 7.570  | -79.302 | 17.570 | 1.00 | 0.00 |
| C    |       |     |     |     |        |         |        |      |      |
| ATOM | 12058 | CD  | GLN | 328 | 6.765  | -78.890 | 18.766 | 1.00 | 0.00 |
| C    |       |     |     |     |        |         |        |      |      |
| ATOM | 12059 | OE1 | GLN | 328 | 7.222  | -79.076 | 19.922 | 1.00 | 0.00 |
| O    |       |     |     |     |        |         |        |      |      |

|      |       |     |     |     |        |         |        |      |      |
|------|-------|-----|-----|-----|--------|---------|--------|------|------|
| ATOM | 12060 | NE2 | GLN | 328 | 5.642  | -78.224 | 18.650 | 1.00 | 0.00 |
| N    |       |     |     |     |        |         |        |      |      |
| ATOM | 12061 | C   | GLN | 328 | 11.199 | -78.994 | 16.741 | 1.00 | 0.00 |
| C    |       |     |     |     |        |         |        |      |      |
| ATOM | 12062 | O   | GLN | 328 | 12.193 | -79.623 | 17.131 | 1.00 | 0.00 |
| O    |       |     |     |     |        |         |        |      |      |
| ATOM | 12063 | N   | GLN | 329 | 11.177 | -77.783 | 16.401 | 1.00 | 0.00 |
| N    |       |     |     |     |        |         |        |      |      |
| ATOM | 12064 | CA  | GLN | 329 | 12.252 | -76.839 | 16.734 | 1.00 | 0.00 |
| C    |       |     |     |     |        |         |        |      |      |
| ATOM | 12065 | CB  | GLN | 329 | 12.589 | -76.106 | 15.423 | 1.00 | 0.00 |
| C    |       |     |     |     |        |         |        |      |      |
| ATOM | 12066 | CG  | GLN | 329 | 12.875 | -76.958 | 14.136 | 1.00 | 0.00 |
| C    |       |     |     |     |        |         |        |      |      |
| ATOM | 12067 | CD  | GLN | 329 | 13.963 | -77.959 | 14.362 | 1.00 | 0.00 |
| C    |       |     |     |     |        |         |        |      |      |
| ATOM | 12068 | OE1 | GLN | 329 | 15.064 | -77.614 | 14.765 | 1.00 | 0.00 |
| O    |       |     |     |     |        |         |        |      |      |
| ATOM | 12069 | NE2 | GLN | 329 | 13.625 | -79.218 | 14.399 | 1.00 | 0.00 |
| N    |       |     |     |     |        |         |        |      |      |
| ATOM | 12070 | C   | GLN | 329 | 11.845 | -75.814 | 17.855 | 1.00 | 0.00 |
| C    |       |     |     |     |        |         |        |      |      |
| ATOM | 12071 | O   | GLN | 329 | 10.698 | -75.555 | 18.146 | 1.00 | 0.00 |
| O    |       |     |     |     |        |         |        |      |      |
| ATOM | 12072 | N   | ALA | 330 | 12.841 | -75.154 | 18.388 | 1.00 | 0.00 |
| N    |       |     |     |     |        |         |        |      |      |
| ATOM | 12073 | CA  | ALA | 330 | 12.624 | -73.997 | 19.239 | 1.00 | 0.00 |
| C    |       |     |     |     |        |         |        |      |      |
| ATOM | 12074 | CB  | ALA | 330 | 12.816 | -74.484 | 20.709 | 1.00 | 0.00 |
| C    |       |     |     |     |        |         |        |      |      |
| ATOM | 12075 | C   | ALA | 330 | 13.687 | -72.925 | 18.910 | 1.00 | 0.00 |
| C    |       |     |     |     |        |         |        |      |      |
| ATOM | 12076 | O   | ALA | 330 | 14.925 | -73.169 | 18.981 | 1.00 | 0.00 |
| O    |       |     |     |     |        |         |        |      |      |
| ATOM | 12077 | N   | LYS | 331 | 13.203 | -71.729 | 18.652 | 1.00 | 0.00 |
| N    |       |     |     |     |        |         |        |      |      |
| ATOM | 12078 | CA  | LYS | 331 | 13.917 | -70.427 | 18.686 | 1.00 | 0.00 |
| C    |       |     |     |     |        |         |        |      |      |
| ATOM | 12079 | CB  | LYS | 331 | 13.283 | -69.282 | 17.868 | 1.00 | 0.00 |
| C    |       |     |     |     |        |         |        |      |      |
| ATOM | 12080 | CG  | LYS | 331 | 14.215 | -68.090 | 17.682 | 1.00 | 0.00 |
| C    |       |     |     |     |        |         |        |      |      |
| ATOM | 12081 | CD  | LYS | 331 | 13.620 | -67.160 | 16.601 | 1.00 | 0.00 |
| C    |       |     |     |     |        |         |        |      |      |
| ATOM | 12082 | CE  | LYS | 331 | 14.672 | -66.084 | 16.419 | 1.00 | 0.00 |
| C    |       |     |     |     |        |         |        |      |      |
| ATOM | 12083 | NZ  | LYS | 331 | 14.391 | -65.042 | 15.450 | 1.00 | 0.00 |
| N1+  |       |     |     |     |        |         |        |      |      |
| ATOM | 12084 | C   | LYS | 331 | 14.241 | -69.967 | 20.150 | 1.00 | 0.00 |
| C    |       |     |     |     |        |         |        |      |      |
| ATOM | 12085 | O   | LYS | 331 | 13.352 | -69.849 | 20.943 | 1.00 | 0.00 |
| O    |       |     |     |     |        |         |        |      |      |
| ATOM | 12086 | N   | VAL | 332 | 15.500 | -69.927 | 20.537 | 1.00 | 0.00 |
| N    |       |     |     |     |        |         |        |      |      |

|      |       |     |     |     |        |         |        |      |      |
|------|-------|-----|-----|-----|--------|---------|--------|------|------|
| ATOM | 12087 | CA  | VAL | 332 | 15.901 | -69.670 | 21.959 | 1.00 | 0.00 |
| C    |       |     |     |     |        |         |        |      |      |
| ATOM | 12088 | CB  | VAL | 332 | 16.496 | -71.032 | 22.531 | 1.00 | 0.00 |
| C    |       |     |     |     |        |         |        |      |      |
| ATOM | 12089 | CG1 | VAL | 332 | 15.613 | -72.260 | 22.218 | 1.00 | 0.00 |
| C    |       |     |     |     |        |         |        |      |      |
| ATOM | 12090 | CG2 | VAL | 332 | 17.909 | -71.418 | 22.311 | 1.00 | 0.00 |
| C    |       |     |     |     |        |         |        |      |      |
| ATOM | 12091 | C   | VAL | 332 | 16.907 | -68.492 | 22.157 | 1.00 | 0.00 |
| C    |       |     |     |     |        |         |        |      |      |
| ATOM | 12092 | O   | VAL | 332 | 17.662 | -68.155 | 21.253 | 1.00 | 0.00 |
| O    |       |     |     |     |        |         |        |      |      |
| ATOM | 12093 | N   | GLN | 333 | 16.953 | -67.936 | 23.354 | 1.00 | 0.00 |
| N    |       |     |     |     |        |         |        |      |      |
| ATOM | 12094 | CA  | GLN | 333 | 18.074 | -67.058 | 23.696 | 1.00 | 0.00 |
| C    |       |     |     |     |        |         |        |      |      |
| ATOM | 12095 | CB  | GLN | 333 | 17.408 | -65.732 | 23.926 | 1.00 | 0.00 |
| C    |       |     |     |     |        |         |        |      |      |
| ATOM | 12096 | CG  | GLN | 333 | 18.400 | -64.570 | 24.060 | 1.00 | 0.00 |
| C    |       |     |     |     |        |         |        |      |      |
| ATOM | 12097 | CD  | GLN | 333 | 17.662 | -63.152 | 24.011 | 1.00 | 0.00 |
| C    |       |     |     |     |        |         |        |      |      |
| ATOM | 12098 | OE1 | GLN | 333 | 16.634 | -63.009 | 23.395 | 1.00 | 0.00 |
| O    |       |     |     |     |        |         |        |      |      |
| ATOM | 12099 | NE2 | GLN | 333 | 18.231 | -62.076 | 24.448 | 1.00 | 0.00 |
| N    |       |     |     |     |        |         |        |      |      |
| ATOM | 12100 | C   | GLN | 333 | 18.757 | -67.540 | 24.976 | 1.00 | 0.00 |
| C    |       |     |     |     |        |         |        |      |      |
| ATOM | 12101 | O   | GLN | 333 | 18.124 | -67.879 | 25.981 | 1.00 | 0.00 |
| O    |       |     |     |     |        |         |        |      |      |
| ATOM | 12102 | N   | ILE | 334 | 20.102 | -67.628 | 24.968 | 1.00 | 0.00 |
| N    |       |     |     |     |        |         |        |      |      |
| ATOM | 12103 | CA  | ILE | 334 | 20.899 | -68.318 | 26.053 | 1.00 | 0.00 |
| C    |       |     |     |     |        |         |        |      |      |
| ATOM | 12104 | CB  | ILE | 334 | 22.334 | -68.637 | 25.563 | 1.00 | 0.00 |
| C    |       |     |     |     |        |         |        |      |      |
| ATOM | 12105 | CG2 | ILE | 334 | 23.051 | -69.375 | 26.696 | 1.00 | 0.00 |
| C    |       |     |     |     |        |         |        |      |      |
| ATOM | 12106 | CG1 | ILE | 334 | 22.553 | -69.552 | 24.245 | 1.00 | 0.00 |
| C    |       |     |     |     |        |         |        |      |      |
| ATOM | 12107 | CD1 | ILE | 334 | 21.702 | -70.868 | 24.161 | 1.00 | 0.00 |
| C    |       |     |     |     |        |         |        |      |      |
| ATOM | 12108 | C   | ILE | 334 | 20.833 | -67.568 | 27.422 | 1.00 | 0.00 |
| C    |       |     |     |     |        |         |        |      |      |
| ATOM | 12109 | O   | ILE | 334 | 21.003 | -66.371 | 27.415 | 1.00 | 0.00 |
| O    |       |     |     |     |        |         |        |      |      |
| ATOM | 12110 | N   | LEU | 335 | 20.596 | -68.228 | 28.590 | 1.00 | 0.00 |
| N    |       |     |     |     |        |         |        |      |      |
| ATOM | 12111 | CA  | LEU | 335 | 20.524 | -67.603 | 29.909 | 1.00 | 0.00 |
| C    |       |     |     |     |        |         |        |      |      |
| ATOM | 12112 | CB  | LEU | 335 | 19.620 | -68.468 | 30.791 | 1.00 | 0.00 |
| C    |       |     |     |     |        |         |        |      |      |
| ATOM | 12113 | CG  | LEU | 335 | 18.120 | -68.189 | 30.460 | 1.00 | 0.00 |
| C    |       |     |     |     |        |         |        |      |      |

|      |       |     |     |     |        |         |        |      |      |
|------|-------|-----|-----|-----|--------|---------|--------|------|------|
| ATOM | 12114 | CD1 | LEU | 335 | 17.278 | -68.833 | 31.567 | 1.00 | 0.00 |
| C    |       |     |     |     |        |         |        |      |      |
| ATOM | 12115 | CD2 | LEU | 335 | 17.690 | -66.699 | 30.411 | 1.00 | 0.00 |
| C    |       |     |     |     |        |         |        |      |      |
| ATOM | 12116 | C   | LEU | 335 | 21.909 | -67.387 | 30.639 | 1.00 | 0.00 |
| C    |       |     |     |     |        |         |        |      |      |
| ATOM | 12117 | O   | LEU | 335 | 22.641 | -68.343 | 31.020 | 1.00 | 0.00 |
| O    |       |     |     |     |        |         |        |      |      |
| ATOM | 12118 | N   | PRO | 336 | 22.319 | -66.106 | 30.910 | 1.00 | 0.00 |
| N    |       |     |     |     |        |         |        |      |      |
| ATOM | 12119 | CD  | PRO | 336 | 21.810 | -64.857 | 30.435 | 1.00 | 0.00 |
| C    |       |     |     |     |        |         |        |      |      |
| ATOM | 12120 | CG  | PRO | 336 | 22.949 | -63.971 | 30.293 | 1.00 | 0.00 |
| C    |       |     |     |     |        |         |        |      |      |
| ATOM | 12121 | CB  | PRO | 336 | 23.891 | -64.324 | 31.429 | 1.00 | 0.00 |
| C    |       |     |     |     |        |         |        |      |      |
| ATOM | 12122 | CA  | PRO | 336 | 23.609 | -65.835 | 31.593 | 1.00 | 0.00 |
| C    |       |     |     |     |        |         |        |      |      |
| ATOM | 12123 | C   | PRO | 336 | 23.335 | -66.159 | 33.084 | 1.00 | 0.00 |
| C    |       |     |     |     |        |         |        |      |      |
| ATOM | 12124 | O   | PRO | 336 | 22.230 | -66.132 | 33.638 | 1.00 | 0.00 |
| O    |       |     |     |     |        |         |        |      |      |
| ATOM | 12125 | N   | GLU | 337 | 24.399 | -66.324 | 33.886 | 1.00 | 0.00 |
| N    |       |     |     |     |        |         |        |      |      |
| ATOM | 12126 | CA  | GLU | 337 | 24.435 | -66.153 | 35.384 | 1.00 | 0.00 |
| C    |       |     |     |     |        |         |        |      |      |
| ATOM | 12127 | CB  | GLU | 337 | 25.573 | -66.881 | 36.034 | 1.00 | 0.00 |
| C    |       |     |     |     |        |         |        |      |      |
| ATOM | 12128 | CG  | GLU | 337 | 25.750 | -68.366 | 35.571 | 1.00 | 0.00 |
| C    |       |     |     |     |        |         |        |      |      |
| ATOM | 12129 | CD  | GLU | 337 | 24.509 | -69.334 | 35.716 | 1.00 | 0.00 |
| C    |       |     |     |     |        |         |        |      |      |
| ATOM | 12130 | OE1 | GLU | 337 | 24.062 | -69.567 | 36.877 | 1.00 | 0.00 |
| O    |       |     |     |     |        |         |        |      |      |
| ATOM | 12131 | OE2 | GLU | 337 | 24.148 | -70.034 | 34.735 | 1.00 | 0.00 |
| O1-  |       |     |     |     |        |         |        |      |      |
| ATOM | 12132 | C   | GLU | 337 | 24.391 | -64.586 | 35.748 | 1.00 | 0.00 |
| C    |       |     |     |     |        |         |        |      |      |
| ATOM | 12133 | O   | GLU | 337 | 25.201 | -63.771 | 35.242 | 1.00 | 0.00 |
| O    |       |     |     |     |        |         |        |      |      |
| ATOM | 12134 | N   | CYS | 338 | 23.740 | -64.278 | 36.873 | 1.00 | 0.00 |
| N    |       |     |     |     |        |         |        |      |      |
| ATOM | 12135 | CA  | CYS | 338 | 23.930 | -63.046 | 37.633 | 1.00 | 0.00 |
| C    |       |     |     |     |        |         |        |      |      |
| ATOM | 12136 | CB  | CYS | 338 | 22.781 | -62.785 | 38.587 | 1.00 | 0.00 |
| C    |       |     |     |     |        |         |        |      |      |
| ATOM | 12137 | SG  | CYS | 338 | 21.213 | -63.189 | 37.757 | 1.00 | 0.00 |
| S    |       |     |     |     |        |         |        |      |      |
| ATOM | 12138 | C   | CYS | 338 | 25.208 | -63.100 | 38.465 | 1.00 | 0.00 |
| C    |       |     |     |     |        |         |        |      |      |
| ATOM | 12139 | O   | CYS | 338 | 25.642 | -64.158 | 38.899 | 1.00 | 0.00 |
| O    |       |     |     |     |        |         |        |      |      |
| ATOM | 12140 | N   | VAL | 339 | 25.768 | -61.914 | 38.824 | 1.00 | 0.00 |
| N    |       |     |     |     |        |         |        |      |      |

|      |       |     |     |     |        |         |        |      |      |
|------|-------|-----|-----|-----|--------|---------|--------|------|------|
| ATOM | 12141 | CA  | VAL | 339 | 26.650 | -61.641 | 39.944 | 1.00 | 0.00 |
| C    |       |     |     |     |        |         |        |      |      |
| ATOM | 12142 | CB  | VAL | 339 | 26.798 | -60.058 | 40.142 | 1.00 | 0.00 |
| C    |       |     |     |     |        |         |        |      |      |
| ATOM | 12143 | CG1 | VAL | 339 | 25.475 | -59.398 | 40.468 | 1.00 | 0.00 |
| C    |       |     |     |     |        |         |        |      |      |
| ATOM | 12144 | CG2 | VAL | 339 | 27.907 | -59.560 | 41.083 | 1.00 | 0.00 |
| C    |       |     |     |     |        |         |        |      |      |
| ATOM | 12145 | C   | VAL | 339 | 26.178 | -62.314 | 41.238 | 1.00 | 0.00 |
| C    |       |     |     |     |        |         |        |      |      |
| ATOM | 12146 | O   | VAL | 339 | 24.975 | -62.427 | 41.486 | 1.00 | 0.00 |
| O    |       |     |     |     |        |         |        |      |      |
| ATOM | 12147 | N   | LEU | 340 | 27.142 | -62.877 | 41.964 | 1.00 | 0.00 |
| N    |       |     |     |     |        |         |        |      |      |
| ATOM | 12148 | CA  | LEU | 340 | 26.891 | -63.608 | 43.197 | 1.00 | 0.00 |
| C    |       |     |     |     |        |         |        |      |      |
| ATOM | 12149 | CB  | LEU | 340 | 27.906 | -64.775 | 43.375 | 1.00 | 0.00 |
| C    |       |     |     |     |        |         |        |      |      |
| ATOM | 12150 | CG  | LEU | 340 | 27.735 | -65.878 | 42.313 | 1.00 | 0.00 |
| C    |       |     |     |     |        |         |        |      |      |
| ATOM | 12151 | CD1 | LEU | 340 | 28.495 | -67.163 | 42.593 | 1.00 | 0.00 |
| C    |       |     |     |     |        |         |        |      |      |
| ATOM | 12152 | CD2 | LEU | 340 | 26.299 | -66.275 | 41.819 | 1.00 | 0.00 |
| C    |       |     |     |     |        |         |        |      |      |
| ATOM | 12153 | C   | LEU | 340 | 27.041 | -62.716 | 44.445 | 1.00 | 0.00 |
| C    |       |     |     |     |        |         |        |      |      |
| ATOM | 12154 | O   | LEU | 340 | 28.139 | -62.350 | 44.851 | 1.00 | 0.00 |
| O    |       |     |     |     |        |         |        |      |      |
| ATOM | 12155 | N   | PRO | 341 | 26.028 | -62.500 | 45.289 | 1.00 | 0.00 |
| N    |       |     |     |     |        |         |        |      |      |
| ATOM | 12156 | CD  | PRO | 341 | 24.603 | -62.733 | 44.911 | 1.00 | 0.00 |
| C    |       |     |     |     |        |         |        |      |      |
| ATOM | 12157 | CG  | PRO | 341 | 23.796 | -62.042 | 45.967 | 1.00 | 0.00 |
| C    |       |     |     |     |        |         |        |      |      |
| ATOM | 12158 | CB  | PRO | 341 | 24.734 | -61.680 | 47.175 | 1.00 | 0.00 |
| C    |       |     |     |     |        |         |        |      |      |
| ATOM | 12159 | CA  | PRO | 341 | 26.176 | -61.854 | 46.575 | 1.00 | 0.00 |
| C    |       |     |     |     |        |         |        |      |      |
| ATOM | 12160 | C   | PRO | 341 | 27.133 | -62.576 | 47.521 | 1.00 | 0.00 |
| C    |       |     |     |     |        |         |        |      |      |
| ATOM | 12161 | O   | PRO | 341 | 27.140 | -63.838 | 47.585 | 1.00 | 0.00 |
| O    |       |     |     |     |        |         |        |      |      |
| ATOM | 12162 | N   | SER | 342 | 28.014 | -61.856 | 48.120 | 1.00 | 0.00 |
| N    |       |     |     |     |        |         |        |      |      |
| ATOM | 12163 | CA  | SER | 342 | 29.169 | -62.325 | 48.932 | 1.00 | 0.00 |
| C    |       |     |     |     |        |         |        |      |      |
| ATOM | 12164 | CB  | SER | 342 | 30.389 | -62.495 | 48.005 | 1.00 | 0.00 |
| C    |       |     |     |     |        |         |        |      |      |
| ATOM | 12165 | OG  | SER | 342 | 30.174 | -63.289 | 46.870 | 1.00 | 0.00 |
| O    |       |     |     |     |        |         |        |      |      |
| ATOM | 12166 | C   | SER | 342 | 29.355 | -61.407 | 50.137 | 1.00 | 0.00 |
| C    |       |     |     |     |        |         |        |      |      |
| ATOM | 12167 | O   | SER | 342 | 30.431 | -60.987 | 50.510 | 1.00 | 0.00 |
| O    |       |     |     |     |        |         |        |      |      |

|      |       |     |     |     |        |         |        |      |      |
|------|-------|-----|-----|-----|--------|---------|--------|------|------|
| ATOM | 12168 | N   | THR | 343 | 28.233 | -61.002 | 50.772 | 1.00 | 0.00 |
| N    |       |     |     |     |        |         |        |      |      |
| ATOM | 12169 | CA  | THR | 343 | 28.043 | -59.765 | 51.474 | 1.00 | 0.00 |
| C    |       |     |     |     |        |         |        |      |      |
| ATOM | 12170 | CB  | THR | 343 | 26.533 | -59.401 | 51.533 | 1.00 | 0.00 |
| C    |       |     |     |     |        |         |        |      |      |
| ATOM | 12171 | CG2 | THR | 343 | 25.841 | -59.524 | 50.192 | 1.00 | 0.00 |
| C    |       |     |     |     |        |         |        |      |      |
| ATOM | 12172 | OG1 | THR | 343 | 25.788 | -60.207 | 52.455 | 1.00 | 0.00 |
| O    |       |     |     |     |        |         |        |      |      |
| ATOM | 12173 | C   | THR | 343 | 28.716 | -59.663 | 52.864 | 1.00 | 0.00 |
| C    |       |     |     |     |        |         |        |      |      |
| ATOM | 12174 | O   | THR | 343 | 28.983 | -58.578 | 53.316 | 1.00 | 0.00 |
| O    |       |     |     |     |        |         |        |      |      |
| ATOM | 12175 | N   | MET | 344 | 29.055 | -60.842 | 53.528 | 1.00 | 0.00 |
| N    |       |     |     |     |        |         |        |      |      |
| ATOM | 12176 | CA  | MET | 344 | 29.744 | -60.923 | 54.865 | 1.00 | 0.00 |
| C    |       |     |     |     |        |         |        |      |      |
| ATOM | 12177 | CB  | MET | 344 | 30.014 | -62.407 | 55.278 | 1.00 | 0.00 |
| C    |       |     |     |     |        |         |        |      |      |
| ATOM | 12178 | CG  | MET | 344 | 28.866 | -63.379 | 55.576 | 1.00 | 0.00 |
| C    |       |     |     |     |        |         |        |      |      |
| ATOM | 12179 | SD  | MET | 344 | 27.822 | -63.766 | 54.179 | 1.00 | 0.00 |
| S    |       |     |     |     |        |         |        |      |      |
| ATOM | 12180 | CE  | MET | 344 | 28.910 | -64.357 | 52.869 | 1.00 | 0.00 |
| C    |       |     |     |     |        |         |        |      |      |
| ATOM | 12181 | C   | MET | 344 | 31.086 | -60.099 | 54.940 | 1.00 | 0.00 |
| C    |       |     |     |     |        |         |        |      |      |
| ATOM | 12182 | O   | MET | 344 | 31.701 | -59.826 | 55.986 | 1.00 | 0.00 |
| O    |       |     |     |     |        |         |        |      |      |
| ATOM | 12183 | N   | SER | 345 | 31.682 | -59.731 | 53.800 | 1.00 | 0.00 |
| N    |       |     |     |     |        |         |        |      |      |
| ATOM | 12184 | CA  | SER | 345 | 32.881 | -58.895 | 53.725 | 1.00 | 0.00 |
| C    |       |     |     |     |        |         |        |      |      |
| ATOM | 12185 | CB  | SER | 345 | 33.802 | -59.394 | 52.601 | 1.00 | 0.00 |
| C    |       |     |     |     |        |         |        |      |      |
| ATOM | 12186 | OG  | SER | 345 | 33.042 | -59.491 | 51.436 | 1.00 | 0.00 |
| O    |       |     |     |     |        |         |        |      |      |
| ATOM | 12187 | C   | SER | 345 | 32.488 | -57.470 | 53.499 | 1.00 | 0.00 |
| C    |       |     |     |     |        |         |        |      |      |
| ATOM | 12188 | O   | SER | 345 | 33.179 | -56.544 | 54.021 | 1.00 | 0.00 |
| O    |       |     |     |     |        |         |        |      |      |
| ATOM | 12189 | N   | ALA | 346 | 31.567 | -57.128 | 52.589 | 1.00 | 0.00 |
| N    |       |     |     |     |        |         |        |      |      |
| ATOM | 12190 | CA  | ALA | 346 | 31.233 | -55.831 | 52.284 | 1.00 | 0.00 |
| C    |       |     |     |     |        |         |        |      |      |
| ATOM | 12191 | CB  | ALA | 346 | 30.386 | -55.609 | 50.987 | 1.00 | 0.00 |
| C    |       |     |     |     |        |         |        |      |      |
| ATOM | 12192 | C   | ALA | 346 | 30.457 | -55.081 | 53.361 | 1.00 | 0.00 |
| C    |       |     |     |     |        |         |        |      |      |
| ATOM | 12193 | O   | ALA | 346 | 30.626 | -53.897 | 53.430 | 1.00 | 0.00 |
| O    |       |     |     |     |        |         |        |      |      |
| ATOM | 12194 | N   | VAL | 347 | 29.645 | -55.704 | 54.222 | 1.00 | 0.00 |
| N    |       |     |     |     |        |         |        |      |      |

|      |       |     |     |     |        |         |        |      |      |
|------|-------|-----|-----|-----|--------|---------|--------|------|------|
| ATOM | 12195 | CA  | VAL | 347 | 28.744 | -55.093 | 55.263 | 1.00 | 0.00 |
| C    |       |     |     |     |        |         |        |      |      |
| ATOM | 12196 | CB  | VAL | 347 | 28.034 | -56.242 | 56.075 | 1.00 | 0.00 |
| C    |       |     |     |     |        |         |        |      |      |
| ATOM | 12197 | CG1 | VAL | 347 | 26.910 | -56.812 | 55.264 | 1.00 | 0.00 |
| C    |       |     |     |     |        |         |        |      |      |
| ATOM | 12198 | CG2 | VAL | 347 | 28.954 | -57.477 | 56.588 | 1.00 | 0.00 |
| C    |       |     |     |     |        |         |        |      |      |
| ATOM | 12199 | C   | VAL | 347 | 29.399 | -54.264 | 56.349 | 1.00 | 0.00 |
| C    |       |     |     |     |        |         |        |      |      |
| ATOM | 12200 | O   | VAL | 347 | 28.623 | -53.498 | 56.897 | 1.00 | 0.00 |
| O    |       |     |     |     |        |         |        |      |      |
| ATOM | 12201 | N   | GLN | 348 | 30.731 | -54.399 | 56.660 | 1.00 | 0.00 |
| N    |       |     |     |     |        |         |        |      |      |
| ATOM | 12202 | CA  | GLN | 348 | 31.529 | -53.728 | 57.748 | 1.00 | 0.00 |
| C    |       |     |     |     |        |         |        |      |      |
| ATOM | 12203 | CB  | GLN | 348 | 31.527 | -54.444 | 59.114 | 1.00 | 0.00 |
| C    |       |     |     |     |        |         |        |      |      |
| ATOM | 12204 | CG  | GLN | 348 | 30.155 | -54.439 | 59.881 | 1.00 | 0.00 |
| C    |       |     |     |     |        |         |        |      |      |
| ATOM | 12205 | CD  | GLN | 348 | 29.609 | -53.088 | 60.348 | 1.00 | 0.00 |
| C    |       |     |     |     |        |         |        |      |      |
| ATOM | 12206 | OE1 | GLN | 348 | 30.088 | -52.506 | 61.289 | 1.00 | 0.00 |
| O    |       |     |     |     |        |         |        |      |      |
| ATOM | 12207 | NE2 | GLN | 348 | 28.665 | -52.498 | 59.622 | 1.00 | 0.00 |
| N    |       |     |     |     |        |         |        |      |      |
| ATOM | 12208 | C   | GLN | 348 | 32.964 | -53.627 | 57.209 | 1.00 | 0.00 |
| C    |       |     |     |     |        |         |        |      |      |
| ATOM | 12209 | O   | GLN | 348 | 33.388 | -54.457 | 56.421 | 1.00 | 0.00 |
| O    |       |     |     |     |        |         |        |      |      |
| ATOM | 12210 | N   | LEU | 349 | 33.696 | -52.627 | 57.648 | 1.00 | 0.00 |
| N    |       |     |     |     |        |         |        |      |      |
| ATOM | 12211 | CA  | LEU | 349 | 35.185 | -52.394 | 57.292 | 1.00 | 0.00 |
| C    |       |     |     |     |        |         |        |      |      |
| ATOM | 12212 | CB  | LEU | 349 | 35.658 | -51.121 | 58.031 | 1.00 | 0.00 |
| C    |       |     |     |     |        |         |        |      |      |
| ATOM | 12213 | CG  | LEU | 349 | 35.262 | -49.876 | 57.225 | 1.00 | 0.00 |
| C    |       |     |     |     |        |         |        |      |      |
| ATOM | 12214 | CD1 | LEU | 349 | 35.148 | -48.671 | 58.067 | 1.00 | 0.00 |
| C    |       |     |     |     |        |         |        |      |      |
| ATOM | 12215 | CD2 | LEU | 349 | 36.216 | -49.572 | 56.114 | 1.00 | 0.00 |
| C    |       |     |     |     |        |         |        |      |      |
| ATOM | 12216 | C   | LEU | 349 | 35.989 | -53.633 | 57.853 | 1.00 | 0.00 |
| C    |       |     |     |     |        |         |        |      |      |
| ATOM | 12217 | O   | LEU | 349 | 35.895 | -54.006 | 59.009 | 1.00 | 0.00 |
| O    |       |     |     |     |        |         |        |      |      |
| ATOM | 12218 | N   | GLU | 350 | 36.862 | -54.163 | 57.021 | 1.00 | 0.00 |
| N    |       |     |     |     |        |         |        |      |      |
| ATOM | 12219 | CA  | GLU | 350 | 37.813 | -55.253 | 57.344 | 1.00 | 0.00 |
| C    |       |     |     |     |        |         |        |      |      |
| ATOM | 12220 | CB  | GLU | 350 | 38.644 | -55.607 | 56.064 | 1.00 | 0.00 |
| C    |       |     |     |     |        |         |        |      |      |
| ATOM | 12221 | CG  | GLU | 350 | 39.750 | -56.734 | 56.169 | 1.00 | 0.00 |
| C    |       |     |     |     |        |         |        |      |      |



|      |       |     |     |     |        |         |        |      |      |
|------|-------|-----|-----|-----|--------|---------|--------|------|------|
| ATOM | 12222 | CD  | GLU | 350 | 39.220 | -58.131 | 56.288 | 1.00 | 0.00 |
| C    |       |     |     |     |        |         |        |      |      |
| ATOM | 12223 | OE1 | GLU | 350 | 40.035 | -59.080 | 56.525 | 1.00 | 0.00 |
| O    |       |     |     |     |        |         |        |      |      |
| ATOM | 12224 | OE2 | GLU | 350 | 38.030 | -58.498 | 56.029 | 1.00 | 0.00 |
| O1-  |       |     |     |     |        |         |        |      |      |
| ATOM | 12225 | C   | GLU | 350 | 38.705 | -55.091 | 58.604 | 1.00 | 0.00 |
| C    |       |     |     |     |        |         |        |      |      |
| ATOM | 12226 | O   | GLU | 350 | 38.870 | -56.020 | 59.348 | 1.00 | 0.00 |
| O    |       |     |     |     |        |         |        |      |      |
| ATOM | 12227 | N   | SER | 351 | 39.054 | -53.878 | 58.827 | 1.00 | 0.00 |
| N    |       |     |     |     |        |         |        |      |      |
| ATOM | 12228 | CA  | SER | 351 | 39.808 | -53.384 | 60.005 | 1.00 | 0.00 |
| C    |       |     |     |     |        |         |        |      |      |
| ATOM | 12229 | CB  | SER | 351 | 40.300 | -52.026 | 59.613 | 1.00 | 0.00 |
| C    |       |     |     |     |        |         |        |      |      |
| ATOM | 12230 | OG  | SER | 351 | 39.312 | -51.096 | 59.201 | 1.00 | 0.00 |
| O    |       |     |     |     |        |         |        |      |      |
| ATOM | 12231 | C   | SER | 351 | 38.965 | -53.278 | 61.258 | 1.00 | 0.00 |
| C    |       |     |     |     |        |         |        |      |      |
| ATOM | 12232 | O   | SER | 351 | 39.517 | -52.941 | 62.299 | 1.00 | 0.00 |
| O    |       |     |     |     |        |         |        |      |      |
| ATOM | 12233 | N   | LEU | 352 | 37.692 | -53.717 | 61.330 | 1.00 | 0.00 |
| N    |       |     |     |     |        |         |        |      |      |
| ATOM | 12234 | CA  | LEU | 352 | 37.048 | -53.866 | 62.626 | 1.00 | 0.00 |
| C    |       |     |     |     |        |         |        |      |      |
| ATOM | 12235 | CB  | LEU | 352 | 35.559 | -53.363 | 62.476 | 1.00 | 0.00 |
| C    |       |     |     |     |        |         |        |      |      |
| ATOM | 12236 | CG  | LEU | 352 | 35.297 | -51.879 | 62.109 | 1.00 | 0.00 |
| C    |       |     |     |     |        |         |        |      |      |
| ATOM | 12237 | CD1 | LEU | 352 | 33.767 | -51.726 | 62.168 | 1.00 | 0.00 |
| C    |       |     |     |     |        |         |        |      |      |
| ATOM | 12238 | CD2 | LEU | 352 | 36.017 | -51.007 | 63.074 | 1.00 | 0.00 |
| C    |       |     |     |     |        |         |        |      |      |
| ATOM | 12239 | C   | LEU | 352 | 37.033 | -55.289 | 63.171 | 1.00 | 0.00 |
| C    |       |     |     |     |        |         |        |      |      |
| ATOM | 12240 | O   | LEU | 352 | 36.487 | -55.502 | 64.275 | 1.00 | 0.00 |
| O    |       |     |     |     |        |         |        |      |      |
| ATOM | 12241 | N   | ASN | 353 | 37.535 | -56.284 | 62.408 | 1.00 | 0.00 |
| N    |       |     |     |     |        |         |        |      |      |
| ATOM | 12242 | CA  | ASN | 353 | 37.406 | -57.683 | 62.714 | 1.00 | 0.00 |
| C    |       |     |     |     |        |         |        |      |      |
| ATOM | 12243 | CB  | ASN | 353 | 37.589 | -58.447 | 61.370 | 1.00 | 0.00 |
| C    |       |     |     |     |        |         |        |      |      |
| ATOM | 12244 | CG  | ASN | 353 | 37.463 | -59.982 | 61.498 | 1.00 | 0.00 |
| C    |       |     |     |     |        |         |        |      |      |
| ATOM | 12245 | OD1 | ASN | 353 | 37.835 | -60.679 | 62.438 | 1.00 | 0.00 |
| O    |       |     |     |     |        |         |        |      |      |
| ATOM | 12246 | ND2 | ASN | 353 | 36.982 | -60.631 | 60.443 | 1.00 | 0.00 |
| N    |       |     |     |     |        |         |        |      |      |
| ATOM | 12247 | C   | ASN | 353 | 38.547 | -58.026 | 63.690 | 1.00 | 0.00 |
| C    |       |     |     |     |        |         |        |      |      |
| ATOM | 12248 | O   | ASN | 353 | 39.705 | -57.723 | 63.394 | 1.00 | 0.00 |
| O    |       |     |     |     |        |         |        |      |      |

|      |       |     |     |     |        |         |        |      |      |
|------|-------|-----|-----|-----|--------|---------|--------|------|------|
| ATOM | 12249 | N   | LYS | 354 | 38.272 | -58.688 | 64.790 | 1.00 | 0.00 |
| N    |       |     |     |     |        |         |        |      |      |
| ATOM | 12250 | CA  | LYS | 354 | 39.295 | -58.983 | 65.857 | 1.00 | 0.00 |
| C    |       |     |     |     |        |         |        |      |      |
| ATOM | 12251 | CB  | LYS | 354 | 38.821 | -58.454 | 67.248 | 1.00 | 0.00 |
| C    |       |     |     |     |        |         |        |      |      |
| ATOM | 12252 | CG  | LYS | 354 | 38.477 | -56.914 | 67.263 | 1.00 | 0.00 |
| C    |       |     |     |     |        |         |        |      |      |
| ATOM | 12253 | CD  | LYS | 354 | 39.727 | -56.046 | 67.216 | 1.00 | 0.00 |
| C    |       |     |     |     |        |         |        |      |      |
| ATOM | 12254 | CE  | LYS | 354 | 39.449 | -54.565 | 67.409 | 1.00 | 0.00 |
| C    |       |     |     |     |        |         |        |      |      |
| ATOM | 12255 | NZ  | LYS | 354 | 40.563 | -53.869 | 68.103 | 1.00 | 0.00 |
| N1+  |       |     |     |     |        |         |        |      |      |
| ATOM | 12256 | C   | LYS | 354 | 39.882 | -60.390 | 65.912 | 1.00 | 0.00 |
| C    |       |     |     |     |        |         |        |      |      |
| ATOM | 12257 | O   | LYS | 354 | 40.839 | -60.525 | 66.686 | 1.00 | 0.00 |
| O    |       |     |     |     |        |         |        |      |      |
| ATOM | 12258 | N   | CYS | 355 | 39.367 | -61.361 | 65.230 | 1.00 | 0.00 |
| N    |       |     |     |     |        |         |        |      |      |
| ATOM | 12259 | CA  | CYS | 355 | 39.820 | -62.751 | 65.092 | 1.00 | 0.00 |
| C    |       |     |     |     |        |         |        |      |      |
| ATOM | 12260 | CB  | CYS | 355 | 38.656 | -63.546 | 64.555 | 1.00 | 0.00 |
| C    |       |     |     |     |        |         |        |      |      |
| ATOM | 12261 | SG  | CYS | 355 | 37.122 | -63.395 | 65.484 | 1.00 | 0.00 |
| S    |       |     |     |     |        |         |        |      |      |
| ATOM | 12262 | C   | CYS | 355 | 41.009 | -63.009 | 64.155 | 1.00 | 0.00 |
| C    |       |     |     |     |        |         |        |      |      |
| ATOM | 12263 | O   | CYS | 355 | 41.120 | -62.267 | 63.152 | 1.00 | 0.00 |
| O    |       |     |     |     |        |         |        |      |      |
| ATOM | 12264 | N   | GLN | 356 | 41.894 | -63.982 | 64.436 | 1.00 | 0.00 |
| N    |       |     |     |     |        |         |        |      |      |
| ATOM | 12265 | CA  | GLN | 356 | 42.977 | -64.342 | 63.479 | 1.00 | 0.00 |
| C    |       |     |     |     |        |         |        |      |      |
| ATOM | 12266 | CB  | GLN | 356 | 44.059 | -65.112 | 64.237 | 1.00 | 0.00 |
| C    |       |     |     |     |        |         |        |      |      |
| ATOM | 12267 | CG  | GLN | 356 | 45.229 | -65.727 | 63.432 | 1.00 | 0.00 |
| C    |       |     |     |     |        |         |        |      |      |
| ATOM | 12268 | CD  | GLN | 356 | 46.036 | -64.683 | 62.696 | 1.00 | 0.00 |
| C    |       |     |     |     |        |         |        |      |      |
| ATOM | 12269 | OE1 | GLN | 356 | 46.169 | -63.625 | 63.236 | 1.00 | 0.00 |
| O    |       |     |     |     |        |         |        |      |      |
| ATOM | 12270 | NE2 | GLN | 356 | 46.558 | -65.052 | 61.525 | 1.00 | 0.00 |
| N    |       |     |     |     |        |         |        |      |      |
| ATOM | 12271 | C   | GLN | 356 | 42.600 | -65.069 | 62.139 | 1.00 | 0.00 |
| C    |       |     |     |     |        |         |        |      |      |
| ATOM | 12272 | O   | GLN | 356 | 41.709 | -66.002 | 62.149 | 1.00 | 0.00 |
| O    |       |     |     |     |        |         |        |      |      |
| ATOM | 12273 | N   | ILE | 357 | 43.164 | -64.675 | 60.977 | 1.00 | 0.00 |
| N    |       |     |     |     |        |         |        |      |      |
| ATOM | 12274 | CA  | ILE | 357 | 42.974 | -65.344 | 59.640 | 1.00 | 0.00 |
| C    |       |     |     |     |        |         |        |      |      |
| ATOM | 12275 | CB  | ILE | 357 | 43.625 | -64.473 | 58.550 | 1.00 | 0.00 |
| C    |       |     |     |     |        |         |        |      |      |

|      |       |     |     |     |        |         |        |      |      |
|------|-------|-----|-----|-----|--------|---------|--------|------|------|
| ATOM | 12276 | CG2 | ILE | 357 | 43.728 | -65.346 | 57.256 | 1.00 | 0.00 |
| C    |       |     |     |     |        |         |        |      |      |
| ATOM | 12277 | CG1 | ILE | 357 | 42.807 | -63.175 | 58.350 | 1.00 | 0.00 |
| C    |       |     |     |     |        |         |        |      |      |
| ATOM | 12278 | CD1 | ILE | 357 | 43.407 | -62.122 | 57.441 | 1.00 | 0.00 |
| C    |       |     |     |     |        |         |        |      |      |
| ATOM | 12279 | C   | ILE | 357 | 43.581 | -66.727 | 59.694 | 1.00 | 0.00 |
| C    |       |     |     |     |        |         |        |      |      |
| ATOM | 12280 | O   | ILE | 357 | 44.763 | -66.984 | 60.049 | 1.00 | 0.00 |
| O    |       |     |     |     |        |         |        |      |      |
| ATOM | 12281 | N   | PHE | 358 | 42.842 | -67.790 | 59.245 | 1.00 | 0.00 |
| N    |       |     |     |     |        |         |        |      |      |
| ATOM | 12282 | CA  | PHE | 358 | 43.273 | -69.186 | 59.140 | 1.00 | 0.00 |
| C    |       |     |     |     |        |         |        |      |      |
| ATOM | 12283 | CB  | PHE | 358 | 42.651 | -69.890 | 60.366 | 1.00 | 0.00 |
| C    |       |     |     |     |        |         |        |      |      |
| ATOM | 12284 | CG  | PHE | 358 | 43.514 | -69.707 | 61.626 | 1.00 | 0.00 |
| C    |       |     |     |     |        |         |        |      |      |
| ATOM | 12285 | CD1 | PHE | 358 | 44.539 | -70.582 | 61.852 | 1.00 | 0.00 |
| C    |       |     |     |     |        |         |        |      |      |
| ATOM | 12286 | CE1 | PHE | 358 | 45.404 | -70.462 | 62.949 | 1.00 | 0.00 |
| C    |       |     |     |     |        |         |        |      |      |
| ATOM | 12287 | CZ  | PHE | 358 | 45.054 | -69.533 | 63.973 | 1.00 | 0.00 |
| C    |       |     |     |     |        |         |        |      |      |
| ATOM | 12288 | CE2 | PHE | 358 | 43.935 | -68.770 | 63.820 | 1.00 | 0.00 |
| C    |       |     |     |     |        |         |        |      |      |
| ATOM | 12289 | CD2 | PHE | 358 | 43.201 | -68.827 | 62.634 | 1.00 | 0.00 |
| C    |       |     |     |     |        |         |        |      |      |
| ATOM | 12290 | C   | PHE | 358 | 42.787 | -69.687 | 57.768 | 1.00 | 0.00 |
| C    |       |     |     |     |        |         |        |      |      |
| ATOM | 12291 | O   | PHE | 358 | 41.877 | -69.106 | 57.188 | 1.00 | 0.00 |
| O    |       |     |     |     |        |         |        |      |      |
| ATOM | 12292 | N   | PRO | 359 | 43.269 | -70.846 | 57.276 | 1.00 | 0.00 |
| N    |       |     |     |     |        |         |        |      |      |
| ATOM | 12293 | CD  | PRO | 359 | 44.522 | -71.471 | 57.689 | 1.00 | 0.00 |
| C    |       |     |     |     |        |         |        |      |      |
| ATOM | 12294 | CG  | PRO | 359 | 44.501 | -72.856 | 56.912 | 1.00 | 0.00 |
| C    |       |     |     |     |        |         |        |      |      |
| ATOM | 12295 | CB  | PRO | 359 | 43.894 | -72.470 | 55.599 | 1.00 | 0.00 |
| C    |       |     |     |     |        |         |        |      |      |
| ATOM | 12296 | CA  | PRO | 359 | 42.751 | -71.570 | 56.068 | 1.00 | 0.00 |
| C    |       |     |     |     |        |         |        |      |      |
| ATOM | 12297 | C   | PRO | 359 | 41.379 | -72.189 | 56.351 | 1.00 | 0.00 |
| C    |       |     |     |     |        |         |        |      |      |
| ATOM | 12298 | O   | PRO | 359 | 41.120 | -72.668 | 57.491 | 1.00 | 0.00 |
| O    |       |     |     |     |        |         |        |      |      |
| ATOM | 12299 | N   | SER | 360 | 40.606 | -72.408 | 55.284 | 1.00 | 0.00 |
| N    |       |     |     |     |        |         |        |      |      |
| ATOM | 12300 | CA  | SER | 360 | 39.517 | -73.380 | 55.153 | 1.00 | 0.00 |
| C    |       |     |     |     |        |         |        |      |      |
| ATOM | 12301 | CB  | SER | 360 | 38.449 | -72.714 | 54.351 | 1.00 | 0.00 |
| C    |       |     |     |     |        |         |        |      |      |
| ATOM | 12302 | OG  | SER | 360 | 37.376 | -73.534 | 53.994 | 1.00 | 0.00 |
| O    |       |     |     |     |        |         |        |      |      |

|      |       |     |     |     |        |         |        |      |      |
|------|-------|-----|-----|-----|--------|---------|--------|------|------|
| ATOM | 12303 | C   | SER | 360 | 39.885 | -74.712 | 54.496 | 1.00 | 0.00 |
| C    |       |     |     |     |        |         |        |      |      |
| ATOM | 12304 | O   | SER | 360 | 40.746 | -74.859 | 53.645 | 1.00 | 0.00 |
| O    |       |     |     |     |        |         |        |      |      |
| ATOM | 12305 | N   | LYS | 361 | 39.171 | -75.800 | 54.914 | 1.00 | 0.00 |
| N    |       |     |     |     |        |         |        |      |      |
| ATOM | 12306 | CA  | LYS | 361 | 39.406 | -77.184 | 54.475 | 1.00 | 0.00 |
| C    |       |     |     |     |        |         |        |      |      |
| ATOM | 12307 | CB  | LYS | 361 | 38.517 | -78.149 | 55.173 | 1.00 | 0.00 |
| C    |       |     |     |     |        |         |        |      |      |
| ATOM | 12308 | CG  | LYS | 361 | 36.966 | -77.918 | 54.861 | 1.00 | 0.00 |
| C    |       |     |     |     |        |         |        |      |      |
| ATOM | 12309 | CD  | LYS | 361 | 36.035 | -78.313 | 56.028 | 1.00 | 0.00 |
| C    |       |     |     |     |        |         |        |      |      |
| ATOM | 12310 | CE  | LYS | 361 | 34.607 | -77.936 | 55.632 | 1.00 | 0.00 |
| C    |       |     |     |     |        |         |        |      |      |
| ATOM | 12311 | NZ  | LYS | 361 | 33.556 | -78.531 | 56.523 | 1.00 | 0.00 |
| N1+  |       |     |     |     |        |         |        |      |      |
| ATOM | 12312 | C   | LYS | 361 | 39.271 | -77.420 | 52.948 | 1.00 | 0.00 |
| C    |       |     |     |     |        |         |        |      |      |
| ATOM | 12313 | O   | LYS | 361 | 38.321 | -76.926 | 52.373 | 1.00 | 0.00 |
| O    |       |     |     |     |        |         |        |      |      |
| ATOM | 12314 | N   | PRO | 362 | 40.192 | -78.134 | 52.269 | 1.00 | 0.00 |
| N    |       |     |     |     |        |         |        |      |      |
| ATOM | 12315 | CD  | PRO | 362 | 41.319 | -78.643 | 52.948 | 1.00 | 0.00 |
| C    |       |     |     |     |        |         |        |      |      |
| ATOM | 12316 | CG  | PRO | 362 | 42.266 | -79.189 | 51.874 | 1.00 | 0.00 |
| C    |       |     |     |     |        |         |        |      |      |
| ATOM | 12317 | CB  | PRO | 362 | 41.293 | -79.540 | 50.718 | 1.00 | 0.00 |
| C    |       |     |     |     |        |         |        |      |      |
| ATOM | 12318 | CA  | PRO | 362 | 40.118 | -78.546 | 50.857 | 1.00 | 0.00 |
| C    |       |     |     |     |        |         |        |      |      |
| ATOM | 12319 | C   | PRO | 362 | 38.745 | -79.217 | 50.515 | 1.00 | 0.00 |
| C    |       |     |     |     |        |         |        |      |      |
| ATOM | 12320 | O   | PRO | 362 | 38.077 | -79.620 | 51.476 | 1.00 | 0.00 |
| O    |       |     |     |     |        |         |        |      |      |
| ATOM | 12321 | N   | VAL | 363 | 38.374 | -79.246 | 49.206 | 1.00 | 0.00 |
| N    |       |     |     |     |        |         |        |      |      |
| ATOM | 12322 | CA  | VAL | 363 | 37.044 | -79.772 | 48.735 | 1.00 | 0.00 |
| C    |       |     |     |     |        |         |        |      |      |
| ATOM | 12323 | CB  | VAL | 363 | 36.530 | -79.233 | 47.365 | 1.00 | 0.00 |
| C    |       |     |     |     |        |         |        |      |      |
| ATOM | 12324 | CG1 | VAL | 363 | 36.515 | -77.691 | 47.389 | 1.00 | 0.00 |
| C    |       |     |     |     |        |         |        |      |      |
| ATOM | 12325 | CG2 | VAL | 363 | 37.375 | -79.709 | 46.214 | 1.00 | 0.00 |
| C    |       |     |     |     |        |         |        |      |      |
| ATOM | 12326 | C   | VAL | 363 | 36.947 | -81.298 | 48.794 | 1.00 | 0.00 |
| C    |       |     |     |     |        |         |        |      |      |
| ATOM | 12327 | O   | VAL | 363 | 35.812 | -81.805 | 48.725 | 1.00 | 0.00 |
| O    |       |     |     |     |        |         |        |      |      |
| ATOM | 12328 | N   | SER | 364 | 38.077 | -82.019 | 48.847 | 1.00 | 0.00 |
| N    |       |     |     |     |        |         |        |      |      |
| ATOM | 12329 | CA  | SER | 364 | 38.220 | -83.469 | 48.937 | 1.00 | 0.00 |
| C    |       |     |     |     |        |         |        |      |      |

|      |       |     |     |     |        |         |        |      |      |
|------|-------|-----|-----|-----|--------|---------|--------|------|------|
| ATOM | 12330 | CB  | SER | 364 | 39.726 | -83.793 | 49.005 | 1.00 | 0.00 |
| C    |       |     |     |     |        |         |        |      |      |
| ATOM | 12331 | OG  | SER | 364 | 39.966 | -85.206 | 48.923 | 1.00 | 0.00 |
| O    |       |     |     |     |        |         |        |      |      |
| ATOM | 12332 | C   | SER | 364 | 37.623 | -84.020 | 50.174 | 1.00 | 0.00 |
| C    |       |     |     |     |        |         |        |      |      |
| ATOM | 12333 | O   | SER | 364 | 37.735 | -83.429 | 51.274 | 1.00 | 0.00 |
| O    |       |     |     |     |        |         |        |      |      |
| ATOM | 12334 | N   | ARG | 365 | 36.978 | -85.196 | 50.071 | 1.00 | 0.00 |
| N    |       |     |     |     |        |         |        |      |      |
| ATOM | 12335 | CA  | ARG | 365 | 36.364 | -85.943 | 51.185 | 1.00 | 0.00 |
| C    |       |     |     |     |        |         |        |      |      |
| ATOM | 12336 | CB  | ARG | 365 | 35.741 | -87.256 | 50.688 | 1.00 | 0.00 |
| C    |       |     |     |     |        |         |        |      |      |
| ATOM | 12337 | CG  | ARG | 365 | 36.565 | -88.157 | 49.786 | 1.00 | 0.00 |
| C    |       |     |     |     |        |         |        |      |      |
| ATOM | 12338 | CD  | ARG | 365 | 35.673 | -89.194 | 49.055 | 1.00 | 0.00 |
| C    |       |     |     |     |        |         |        |      |      |
| ATOM | 12339 | NE  | ARG | 365 | 35.253 | -90.332 | 49.875 | 1.00 | 0.00 |
| N    |       |     |     |     |        |         |        |      |      |
| ATOM | 12340 | CZ  | ARG | 365 | 34.064 | -90.697 | 50.222 | 1.00 | 0.00 |
| C    |       |     |     |     |        |         |        |      |      |
| ATOM | 12341 | NH1 | ARG | 365 | 33.976 | -91.643 | 51.101 | 1.00 | 0.00 |
| N    |       |     |     |     |        |         |        |      |      |
| ATOM | 12342 | NH2 | ARG | 365 | 33.020 | -90.149 | 49.760 | 1.00 | 0.00 |
| N1+  |       |     |     |     |        |         |        |      |      |
| ATOM | 12343 | C   | ARG | 365 | 37.415 | -86.315 | 52.178 | 1.00 | 0.00 |
| C    |       |     |     |     |        |         |        |      |      |
| ATOM | 12344 | O   | ARG | 365 | 37.048 | -86.571 | 53.303 | 1.00 | 0.00 |
| O    |       |     |     |     |        |         |        |      |      |
| ATOM | 12345 | N   | GLU | 366 | 38.682 | -86.300 | 51.817 | 1.00 | 0.00 |
| N    |       |     |     |     |        |         |        |      |      |
| ATOM | 12346 | CA  | GLU | 366 | 39.721 | -86.866 | 52.678 | 1.00 | 0.00 |
| C    |       |     |     |     |        |         |        |      |      |
| ATOM | 12347 | CB  | GLU | 366 | 40.933 | -87.362 | 51.874 | 1.00 | 0.00 |
| C    |       |     |     |     |        |         |        |      |      |
| ATOM | 12348 | CG  | GLU | 366 | 42.208 | -88.063 | 52.513 | 1.00 | 0.00 |
| C    |       |     |     |     |        |         |        |      |      |
| ATOM | 12349 | CD  | GLU | 366 | 41.938 | -88.955 | 53.746 | 1.00 | 0.00 |
| C    |       |     |     |     |        |         |        |      |      |
| ATOM | 12350 | OE1 | GLU | 366 | 40.870 | -89.615 | 53.836 | 1.00 | 0.00 |
| O    |       |     |     |     |        |         |        |      |      |
| ATOM | 12351 | OE2 | GLU | 366 | 42.788 | -89.130 | 54.682 | 1.00 | 0.00 |
| O1-  |       |     |     |     |        |         |        |      |      |
| ATOM | 12352 | C   | GLU | 366 | 40.183 | -85.769 | 53.696 | 1.00 | 0.00 |
| C    |       |     |     |     |        |         |        |      |      |
| ATOM | 12353 | O   | GLU | 366 | 40.783 | -86.102 | 54.730 | 1.00 | 0.00 |
| O    |       |     |     |     |        |         |        |      |      |
| ATOM | 12354 | N   | ASP | 367 | 39.854 | -84.446 | 53.470 | 1.00 | 0.00 |
| N    |       |     |     |     |        |         |        |      |      |
| ATOM | 12355 | CA  | ASP | 367 | 40.151 | -83.397 | 54.385 | 1.00 | 0.00 |
| C    |       |     |     |     |        |         |        |      |      |
| ATOM | 12356 | CB  | ASP | 367 | 41.011 | -82.321 | 53.687 | 1.00 | 0.00 |
| C    |       |     |     |     |        |         |        |      |      |

|      |       |     |     |     |        |         |        |      |      |
|------|-------|-----|-----|-----|--------|---------|--------|------|------|
| ATOM | 12357 | CG  | ASP | 367 | 42.190 | -82.905 | 52.832 | 1.00 | 0.00 |
| C    |       |     |     |     |        |         |        |      |      |
| ATOM | 12358 | OD1 | ASP | 367 | 42.029 | -83.016 | 51.605 | 1.00 | 0.00 |
| O    |       |     |     |     |        |         |        |      |      |
| ATOM | 12359 | OD2 | ASP | 367 | 43.307 | -82.960 | 53.372 | 1.00 | 0.00 |
| O1-  |       |     |     |     |        |         |        |      |      |
| ATOM | 12360 | C   | ASP | 367 | 38.851 | -82.817 | 55.062 | 1.00 | 0.00 |
| C    |       |     |     |     |        |         |        |      |      |
| ATOM | 12361 | O   | ASP | 367 | 39.007 | -81.759 | 55.673 | 1.00 | 0.00 |
| O    |       |     |     |     |        |         |        |      |      |
| ATOM | 12362 | N   | GLN | 368 | 37.664 | -83.349 | 54.794 | 1.00 | 0.00 |
| N    |       |     |     |     |        |         |        |      |      |
| ATOM | 12363 | CA  | GLN | 368 | 36.412 | -82.756 | 55.279 | 1.00 | 0.00 |
| C    |       |     |     |     |        |         |        |      |      |
| ATOM | 12364 | CB  | GLN | 368 | 35.335 | -83.568 | 54.676 | 1.00 | 0.00 |
| C    |       |     |     |     |        |         |        |      |      |
| ATOM | 12365 | CG  | GLN | 368 | 33.809 | -83.318 | 54.865 | 1.00 | 0.00 |
| C    |       |     |     |     |        |         |        |      |      |
| ATOM | 12366 | CD  | GLN | 368 | 33.390 | -81.854 | 54.884 | 1.00 | 0.00 |
| C    |       |     |     |     |        |         |        |      |      |
| ATOM | 12367 | OE1 | GLN | 368 | 32.876 | -81.342 | 55.835 | 1.00 | 0.00 |
| O    |       |     |     |     |        |         |        |      |      |
| ATOM | 12368 | NE2 | GLN | 368 | 33.774 | -81.082 | 53.979 | 1.00 | 0.00 |
| N    |       |     |     |     |        |         |        |      |      |
| ATOM | 12369 | C   | GLN | 368 | 36.246 | -82.779 | 56.811 | 1.00 | 0.00 |
| C    |       |     |     |     |        |         |        |      |      |
| ATOM | 12370 | O   | GLN | 368 | 35.692 | -81.842 | 57.338 | 1.00 | 0.00 |
| O    |       |     |     |     |        |         |        |      |      |
| ATOM | 12371 | N   | CYS | 369 | 36.658 | -83.864 | 57.479 | 1.00 | 0.00 |
| N    |       |     |     |     |        |         |        |      |      |
| ATOM | 12372 | CA  | CYS | 369 | 36.873 | -83.933 | 58.982 | 1.00 | 0.00 |
| C    |       |     |     |     |        |         |        |      |      |
| ATOM | 12373 | CB  | CYS | 369 | 37.246 | -85.286 | 59.442 | 1.00 | 0.00 |
| C    |       |     |     |     |        |         |        |      |      |
| ATOM | 12374 | SG  | CYS | 369 | 36.205 | -86.510 | 58.533 | 1.00 | 0.00 |
| S    |       |     |     |     |        |         |        |      |      |
| ATOM | 12375 | C   | CYS | 369 | 37.924 | -82.918 | 59.495 | 1.00 | 0.00 |
| C    |       |     |     |     |        |         |        |      |      |
| ATOM | 12376 | O   | CYS | 369 | 38.136 | -82.846 | 60.705 | 1.00 | 0.00 |
| O    |       |     |     |     |        |         |        |      |      |
| ATOM | 12377 | N   | SER | 370 | 38.587 | -82.065 | 58.644 | 1.00 | 0.00 |
| N    |       |     |     |     |        |         |        |      |      |
| ATOM | 12378 | CA  | SER | 370 | 39.461 | -80.959 | 59.173 | 1.00 | 0.00 |
| C    |       |     |     |     |        |         |        |      |      |
| ATOM | 12379 | CB  | SER | 370 | 40.306 | -80.587 | 57.955 | 1.00 | 0.00 |
| C    |       |     |     |     |        |         |        |      |      |
| ATOM | 12380 | OG  | SER | 370 | 41.411 | -79.746 | 58.392 | 1.00 | 0.00 |
| O    |       |     |     |     |        |         |        |      |      |
| ATOM | 12381 | C   | SER | 370 | 38.740 | -79.799 | 59.788 | 1.00 | 0.00 |
| C    |       |     |     |     |        |         |        |      |      |
| ATOM | 12382 | O   | SER | 370 | 38.152 | -78.936 | 59.091 | 1.00 | 0.00 |
| O    |       |     |     |     |        |         |        |      |      |
| ATOM | 12383 | N   | TYR | 371 | 38.623 | -79.831 | 61.144 | 1.00 | 0.00 |
| N    |       |     |     |     |        |         |        |      |      |

|      |       |     |     |     |        |         |        |      |      |
|------|-------|-----|-----|-----|--------|---------|--------|------|------|
| ATOM | 12384 | CA  | TYR | 371 | 37.913 | -78.785 | 61.914 | 1.00 | 0.00 |
| C    |       |     |     |     |        |         |        |      |      |
| ATOM | 12385 | CB  | TYR | 371 | 37.175 | -79.400 | 63.070 | 1.00 | 0.00 |
| C    |       |     |     |     |        |         |        |      |      |
| ATOM | 12386 | CG  | TYR | 371 | 36.416 | -78.477 | 63.987 | 1.00 | 0.00 |
| C    |       |     |     |     |        |         |        |      |      |
| ATOM | 12387 | CD1 | TYR | 371 | 35.088 | -78.287 | 63.723 | 1.00 | 0.00 |
| C    |       |     |     |     |        |         |        |      |      |
| ATOM | 12388 | CE1 | TYR | 371 | 34.407 | -77.467 | 64.632 | 1.00 | 0.00 |
| C    |       |     |     |     |        |         |        |      |      |
| ATOM | 12389 | CZ  | TYR | 371 | 34.993 | -76.854 | 65.781 | 1.00 | 0.00 |
| C    |       |     |     |     |        |         |        |      |      |
| ATOM | 12390 | OH  | TYR | 371 | 34.193 | -76.128 | 66.626 | 1.00 | 0.00 |
| O    |       |     |     |     |        |         |        |      |      |
| ATOM | 12391 | CE2 | TYR | 371 | 36.352 | -77.170 | 66.000 | 1.00 | 0.00 |
| C    |       |     |     |     |        |         |        |      |      |
| ATOM | 12392 | CD2 | TYR | 371 | 37.071 | -78.008 | 65.126 | 1.00 | 0.00 |
| C    |       |     |     |     |        |         |        |      |      |
| ATOM | 12393 | C   | TYR | 371 | 38.804 | -77.721 | 62.531 | 1.00 | 0.00 |
| C    |       |     |     |     |        |         |        |      |      |
| ATOM | 12394 | O   | TYR | 371 | 38.407 | -76.528 | 62.731 | 1.00 | 0.00 |
| O    |       |     |     |     |        |         |        |      |      |
| ATOM | 12395 | N   | LYS | 372 | 40.063 | -78.055 | 62.803 | 1.00 | 0.00 |
| N    |       |     |     |     |        |         |        |      |      |
| ATOM | 12396 | CA  | LYS | 372 | 41.015 | -77.356 | 63.673 | 1.00 | 0.00 |
| C    |       |     |     |     |        |         |        |      |      |
| ATOM | 12397 | CB  | LYS | 372 | 42.344 | -78.116 | 63.826 | 1.00 | 0.00 |
| C    |       |     |     |     |        |         |        |      |      |
| ATOM | 12398 | CG  | LYS | 372 | 43.079 | -78.479 | 62.534 | 1.00 | 0.00 |
| C    |       |     |     |     |        |         |        |      |      |
| ATOM | 12399 | CD  | LYS | 372 | 44.493 | -78.964 | 62.807 | 1.00 | 0.00 |
| C    |       |     |     |     |        |         |        |      |      |
| ATOM | 12400 | CE  | LYS | 372 | 44.487 | -80.216 | 63.776 | 1.00 | 0.00 |
| C    |       |     |     |     |        |         |        |      |      |
| ATOM | 12401 | NZ  | LYS | 372 | 45.907 | -80.614 | 64.137 | 1.00 | 0.00 |
| N1+  |       |     |     |     |        |         |        |      |      |
| ATOM | 12402 | C   | LYS | 372 | 41.236 | -75.899 | 63.287 | 1.00 | 0.00 |
| C    |       |     |     |     |        |         |        |      |      |
| ATOM | 12403 | O   | LYS | 372 | 41.166 | -74.997 | 64.105 | 1.00 | 0.00 |
| O    |       |     |     |     |        |         |        |      |      |
| ATOM | 12404 | N   | TRP | 373 | 41.279 | -75.600 | 62.020 | 1.00 | 0.00 |
| N    |       |     |     |     |        |         |        |      |      |
| ATOM | 12405 | CA  | TRP | 373 | 41.488 | -74.325 | 61.425 | 1.00 | 0.00 |
| C    |       |     |     |     |        |         |        |      |      |
| ATOM | 12406 | CB  | TRP | 373 | 42.639 | -74.300 | 60.500 | 1.00 | 0.00 |
| C    |       |     |     |     |        |         |        |      |      |
| ATOM | 12407 | CG  | TRP | 373 | 43.969 | -74.544 | 61.187 | 1.00 | 0.00 |
| C    |       |     |     |     |        |         |        |      |      |
| ATOM | 12408 | CD1 | TRP | 373 | 44.455 | -73.790 | 62.186 | 1.00 | 0.00 |
| C    |       |     |     |     |        |         |        |      |      |
| ATOM | 12409 | NE1 | TRP | 373 | 45.677 | -74.336 | 62.582 | 1.00 | 0.00 |
| N    |       |     |     |     |        |         |        |      |      |
| ATOM | 12410 | CE2 | TRP | 373 | 46.004 | -75.490 | 61.894 | 1.00 | 0.00 |
| C    |       |     |     |     |        |         |        |      |      |

|      |       |     |     |     |        |         |        |      |      |
|------|-------|-----|-----|-----|--------|---------|--------|------|------|
| ATOM | 12411 | CZ2 | TRP | 373 | 46.996 | -76.512 | 61.942 | 1.00 | 0.00 |
| C    |       |     |     |     |        |         |        |      |      |
| ATOM | 12412 | CH2 | TRP | 373 | 46.998 | -77.530 | 60.980 | 1.00 | 0.00 |
| C    |       |     |     |     |        |         |        |      |      |
| ATOM | 12413 | CZ3 | TRP | 373 | 46.114 | -77.593 | 59.945 | 1.00 | 0.00 |
| C    |       |     |     |     |        |         |        |      |      |
| ATOM | 12414 | CE3 | TRP | 373 | 45.094 | -76.620 | 59.946 | 1.00 | 0.00 |
| C    |       |     |     |     |        |         |        |      |      |
| ATOM | 12415 | CD2 | TRP | 373 | 45.007 | -75.537 | 60.872 | 1.00 | 0.00 |
| C    |       |     |     |     |        |         |        |      |      |
| ATOM | 12416 | C   | TRP | 373 | 40.171 | -73.863 | 60.705 | 1.00 | 0.00 |
| C    |       |     |     |     |        |         |        |      |      |
| ATOM | 12417 | O   | TRP | 373 | 39.814 | -72.703 | 60.603 | 1.00 | 0.00 |
| O    |       |     |     |     |        |         |        |      |      |
| ATOM | 12418 | N   | TRP | 374 | 39.341 | -74.834 | 60.159 | 1.00 | 0.00 |
| N    |       |     |     |     |        |         |        |      |      |
| ATOM | 12419 | CA  | TRP | 374 | 38.021 | -74.528 | 59.612 | 1.00 | 0.00 |
| C    |       |     |     |     |        |         |        |      |      |
| ATOM | 12420 | CB  | TRP | 374 | 37.402 | -75.881 | 59.323 | 1.00 | 0.00 |
| C    |       |     |     |     |        |         |        |      |      |
| ATOM | 12421 | CG  | TRP | 374 | 35.906 | -75.870 | 59.087 | 1.00 | 0.00 |
| C    |       |     |     |     |        |         |        |      |      |
| ATOM | 12422 | CD1 | TRP | 374 | 34.934 | -76.338 | 59.933 | 1.00 | 0.00 |
| C    |       |     |     |     |        |         |        |      |      |
| ATOM | 12423 | NE1 | TRP | 374 | 33.687 | -76.032 | 59.425 | 1.00 | 0.00 |
| N    |       |     |     |     |        |         |        |      |      |
| ATOM | 12424 | CE2 | TRP | 374 | 33.783 | -75.229 | 58.326 | 1.00 | 0.00 |
| C    |       |     |     |     |        |         |        |      |      |
| ATOM | 12425 | CZ2 | TRP | 374 | 32.773 | -74.772 | 57.527 | 1.00 | 0.00 |
| C    |       |     |     |     |        |         |        |      |      |
| ATOM | 12426 | CH2 | TRP | 374 | 33.140 | -74.234 | 56.314 | 1.00 | 0.00 |
| C    |       |     |     |     |        |         |        |      |      |
| ATOM | 12427 | CZ3 | TRP | 374 | 34.487 | -74.032 | 55.972 | 1.00 | 0.00 |
| C    |       |     |     |     |        |         |        |      |      |
| ATOM | 12428 | CE3 | TRP | 374 | 35.512 | -74.457 | 56.830 | 1.00 | 0.00 |
| C    |       |     |     |     |        |         |        |      |      |
| ATOM | 12429 | CD2 | TRP | 374 | 35.142 | -75.120 | 58.022 | 1.00 | 0.00 |
| C    |       |     |     |     |        |         |        |      |      |
| ATOM | 12430 | C   | TRP | 374 | 37.115 | -73.707 | 60.536 | 1.00 | 0.00 |
| C    |       |     |     |     |        |         |        |      |      |
| ATOM | 12431 | O   | TRP | 374 | 36.546 | -72.778 | 60.114 | 1.00 | 0.00 |
| O    |       |     |     |     |        |         |        |      |      |
| ATOM | 12432 | N   | GLN | 375 | 37.085 | -74.052 | 61.835 | 1.00 | 0.00 |
| N    |       |     |     |     |        |         |        |      |      |
| ATOM | 12433 | CA  | GLN | 375 | 36.413 | -73.336 | 62.937 | 1.00 | 0.00 |
| C    |       |     |     |     |        |         |        |      |      |
| ATOM | 12434 | CB  | GLN | 375 | 36.680 | -74.104 | 64.220 | 1.00 | 0.00 |
| C    |       |     |     |     |        |         |        |      |      |
| ATOM | 12435 | CG  | GLN | 375 | 36.175 | -73.428 | 65.519 | 1.00 | 0.00 |
| C    |       |     |     |     |        |         |        |      |      |
| ATOM | 12436 | CD  | GLN | 375 | 34.672 | -73.272 | 65.576 | 1.00 | 0.00 |
| C    |       |     |     |     |        |         |        |      |      |
| ATOM | 12437 | OE1 | GLN | 375 | 33.913 | -73.818 | 64.755 | 1.00 | 0.00 |
| O    |       |     |     |     |        |         |        |      |      |



|      |       |     |     |     |        |         |        |      |      |
|------|-------|-----|-----|-----|--------|---------|--------|------|------|
| ATOM | 12438 | NE2 | GLN | 375 | 34.141 | -72.697 | 66.637 | 1.00 | 0.00 |
| N    |       |     |     |     |        |         |        |      |      |
| ATOM | 12439 | C   | GLN | 375 | 36.981 | -71.941 | 63.107 | 1.00 | 0.00 |
| C    |       |     |     |     |        |         |        |      |      |
| ATOM | 12440 | O   | GLN | 375 | 36.278 | -71.020 | 63.489 | 1.00 | 0.00 |
| O    |       |     |     |     |        |         |        |      |      |
| ATOM | 12441 | N   | LYS | 376 | 38.290 | -71.699 | 62.876 | 1.00 | 0.00 |
| N    |       |     |     |     |        |         |        |      |      |
| ATOM | 12442 | CA  | LYS | 376 | 39.017 | -70.477 | 63.192 | 1.00 | 0.00 |
| C    |       |     |     |     |        |         |        |      |      |
| ATOM | 12443 | CB  | LYS | 376 | 40.493 | -70.748 | 63.368 | 1.00 | 0.00 |
| C    |       |     |     |     |        |         |        |      |      |
| ATOM | 12444 | CG  | LYS | 376 | 40.754 | -71.598 | 64.572 | 1.00 | 0.00 |
| C    |       |     |     |     |        |         |        |      |      |
| ATOM | 12445 | CD  | LYS | 376 | 42.231 | -71.738 | 64.992 | 1.00 | 0.00 |
| C    |       |     |     |     |        |         |        |      |      |
| ATOM | 12446 | CE  | LYS | 376 | 42.253 | -72.208 | 66.348 | 1.00 | 0.00 |
| C    |       |     |     |     |        |         |        |      |      |
| ATOM | 12447 | NZ  | LYS | 376 | 42.112 | -73.633 | 66.324 | 1.00 | 0.00 |
| N1+  |       |     |     |     |        |         |        |      |      |
| ATOM | 12448 | C   | LYS | 376 | 38.761 | -69.600 | 61.959 | 1.00 | 0.00 |
| C    |       |     |     |     |        |         |        |      |      |
| ATOM | 12449 | O   | LYS | 376 | 38.398 | -68.413 | 62.150 | 1.00 | 0.00 |
| O    |       |     |     |     |        |         |        |      |      |
| ATOM | 12450 | N   | TYR | 377 | 38.834 | -70.083 | 60.719 | 1.00 | 0.00 |
| N    |       |     |     |     |        |         |        |      |      |
| ATOM | 12451 | CA  | TYR | 377 | 38.305 | -69.460 | 59.501 | 1.00 | 0.00 |
| C    |       |     |     |     |        |         |        |      |      |
| ATOM | 12452 | CB  | TYR | 377 | 38.646 | -70.477 | 58.316 | 1.00 | 0.00 |
| C    |       |     |     |     |        |         |        |      |      |
| ATOM | 12453 | CG  | TYR | 377 | 37.997 | -70.177 | 56.969 | 1.00 | 0.00 |
| C    |       |     |     |     |        |         |        |      |      |
| ATOM | 12454 | CD1 | TYR | 377 | 38.745 | -69.521 | 56.001 | 1.00 | 0.00 |
| C    |       |     |     |     |        |         |        |      |      |
| ATOM | 12455 | CE1 | TYR | 377 | 38.077 | -69.131 | 54.847 | 1.00 | 0.00 |
| C    |       |     |     |     |        |         |        |      |      |
| ATOM | 12456 | CZ  | TYR | 377 | 36.781 | -69.470 | 54.566 | 1.00 | 0.00 |
| C    |       |     |     |     |        |         |        |      |      |
| ATOM | 12457 | OH  | TYR | 377 | 36.332 | -69.093 | 53.302 | 1.00 | 0.00 |
| O    |       |     |     |     |        |         |        |      |      |
| ATOM | 12458 | CE2 | TYR | 377 | 36.010 | -70.128 | 55.526 | 1.00 | 0.00 |
| C    |       |     |     |     |        |         |        |      |      |
| ATOM | 12459 | CD2 | TYR | 377 | 36.606 | -70.495 | 56.781 | 1.00 | 0.00 |
| C    |       |     |     |     |        |         |        |      |      |
| ATOM | 12460 | C   | TYR | 377 | 36.825 | -69.063 | 59.599 | 1.00 | 0.00 |
| C    |       |     |     |     |        |         |        |      |      |
| ATOM | 12461 | O   | TYR | 377 | 36.470 | -67.906 | 59.325 | 1.00 | 0.00 |
| O    |       |     |     |     |        |         |        |      |      |
| ATOM | 12462 | N   | GLN | 378 | 36.006 | -69.911 | 60.298 | 1.00 | 0.00 |
| N    |       |     |     |     |        |         |        |      |      |
| ATOM | 12463 | CA  | GLN | 378 | 34.606 | -69.525 | 60.448 | 1.00 | 0.00 |
| C    |       |     |     |     |        |         |        |      |      |
| ATOM | 12464 | CB  | GLN | 378 | 33.792 | -70.798 | 60.644 | 1.00 | 0.00 |
| C    |       |     |     |     |        |         |        |      |      |

|      |       |     |     |     |        |         |        |      |      |
|------|-------|-----|-----|-----|--------|---------|--------|------|------|
| ATOM | 12465 | CG  | GLN | 378 | 33.572 | -71.603 | 59.386 | 1.00 | 0.00 |
| C    |       |     |     |     |        |         |        |      |      |
| ATOM | 12466 | CD  | GLN | 378 | 32.605 | -70.962 | 58.456 | 1.00 | 0.00 |
| C    |       |     |     |     |        |         |        |      |      |
| ATOM | 12467 | OE1 | GLN | 378 | 32.907 | -70.015 | 57.661 | 1.00 | 0.00 |
| O    |       |     |     |     |        |         |        |      |      |
| ATOM | 12468 | NE2 | GLN | 378 | 31.424 | -71.502 | 58.474 | 1.00 | 0.00 |
| N    |       |     |     |     |        |         |        |      |      |
| ATOM | 12469 | C   | GLN | 378 | 34.294 | -68.570 | 61.556 | 1.00 | 0.00 |
| C    |       |     |     |     |        |         |        |      |      |
| ATOM | 12470 | O   | GLN | 378 | 33.477 | -67.707 | 61.381 | 1.00 | 0.00 |
| O    |       |     |     |     |        |         |        |      |      |
| ATOM | 12471 | N   | LYS | 379 | 34.998 | -68.601 | 62.644 | 1.00 | 0.00 |
| N    |       |     |     |     |        |         |        |      |      |
| ATOM | 12472 | CA  | LYS | 379 | 35.079 | -67.522 | 63.691 | 1.00 | 0.00 |
| C    |       |     |     |     |        |         |        |      |      |
| ATOM | 12473 | CB  | LYS | 379 | 36.046 | -67.920 | 64.866 | 1.00 | 0.00 |
| C    |       |     |     |     |        |         |        |      |      |
| ATOM | 12474 | CG  | LYS | 379 | 36.173 | -66.785 | 65.913 | 1.00 | 0.00 |
| C    |       |     |     |     |        |         |        |      |      |
| ATOM | 12475 | CD  | LYS | 379 | 35.001 | -66.586 | 66.833 | 1.00 | 0.00 |
| C    |       |     |     |     |        |         |        |      |      |
| ATOM | 12476 | CE  | LYS | 379 | 35.438 | -65.719 | 67.982 | 1.00 | 0.00 |
| C    |       |     |     |     |        |         |        |      |      |
| ATOM | 12477 | NZ  | LYS | 379 | 34.343 | -65.423 | 68.895 | 1.00 | 0.00 |
| N1+  |       |     |     |     |        |         |        |      |      |
| ATOM | 12478 | C   | LYS | 379 | 35.551 | -66.165 | 63.070 | 1.00 | 0.00 |
| C    |       |     |     |     |        |         |        |      |      |
| ATOM | 12479 | O   | LYS | 379 | 35.050 | -65.143 | 63.525 | 1.00 | 0.00 |
| O    |       |     |     |     |        |         |        |      |      |
| ATOM | 12480 | N   | ARG | 380 | 36.543 | -66.091 | 62.147 | 1.00 | 0.00 |
| N    |       |     |     |     |        |         |        |      |      |
| ATOM | 12481 | CA  | ARG | 380 | 36.931 | -64.917 | 61.397 | 1.00 | 0.00 |
| C    |       |     |     |     |        |         |        |      |      |
| ATOM | 12482 | CB  | ARG | 380 | 38.173 | -65.280 | 60.567 | 1.00 | 0.00 |
| C    |       |     |     |     |        |         |        |      |      |
| ATOM | 12483 | CG  | ARG | 380 | 38.801 | -64.041 | 59.766 | 1.00 | 0.00 |
| C    |       |     |     |     |        |         |        |      |      |
| ATOM | 12484 | CD  | ARG | 380 | 39.545 | -63.013 | 60.498 | 1.00 | 0.00 |
| C    |       |     |     |     |        |         |        |      |      |
| ATOM | 12485 | NE  | ARG | 380 | 39.966 | -61.851 | 59.595 | 1.00 | 0.00 |
| N    |       |     |     |     |        |         |        |      |      |
| ATOM | 12486 | CZ  | ARG | 380 | 40.826 | -60.868 | 59.863 | 1.00 | 0.00 |
| C    |       |     |     |     |        |         |        |      |      |
| ATOM | 12487 | NH1 | ARG | 380 | 41.016 | -59.857 | 59.078 | 1.00 | 0.00 |
| N    |       |     |     |     |        |         |        |      |      |
| ATOM | 12488 | NH2 | ARG | 380 | 41.548 | -60.910 | 60.903 | 1.00 | 0.00 |
| N1+  |       |     |     |     |        |         |        |      |      |
| ATOM | 12489 | C   | ARG | 380 | 35.872 | -64.416 | 60.433 | 1.00 | 0.00 |
| C    |       |     |     |     |        |         |        |      |      |
| ATOM | 12490 | O   | ARG | 380 | 35.569 | -63.245 | 60.420 | 1.00 | 0.00 |
| O    |       |     |     |     |        |         |        |      |      |
| ATOM | 12491 | N   | LYS | 381 | 35.259 | -65.322 | 59.588 | 1.00 | 0.00 |
| N    |       |     |     |     |        |         |        |      |      |

|      |       |     |     |     |        |         |        |      |      |
|------|-------|-----|-----|-----|--------|---------|--------|------|------|
| ATOM | 12492 | CA  | LYS | 381 | 34.189 | -64.974 | 58.605 | 1.00 | 0.00 |
| C    |       |     |     |     |        |         |        |      |      |
| ATOM | 12493 | CB  | LYS | 381 | 33.721 | -66.198 | 57.883 | 1.00 | 0.00 |
| C    |       |     |     |     |        |         |        |      |      |
| ATOM | 12494 | CG  | LYS | 381 | 32.909 | -65.987 | 56.611 | 1.00 | 0.00 |
| C    |       |     |     |     |        |         |        |      |      |
| ATOM | 12495 | CD  | LYS | 381 | 32.429 | -67.320 | 55.954 | 1.00 | 0.00 |
| C    |       |     |     |     |        |         |        |      |      |
| ATOM | 12496 | CE  | LYS | 381 | 33.506 | -67.916 | 55.104 | 1.00 | 0.00 |
| C    |       |     |     |     |        |         |        |      |      |
| ATOM | 12497 | NZ  | LYS | 381 | 32.906 | -68.769 | 54.081 | 1.00 | 0.00 |
| N1+  |       |     |     |     |        |         |        |      |      |
| ATOM | 12498 | C   | LYS | 381 | 33.056 | -64.101 | 59.318 | 1.00 | 0.00 |
| C    |       |     |     |     |        |         |        |      |      |
| ATOM | 12499 | O   | LYS | 381 | 32.656 | -63.064 | 58.800 | 1.00 | 0.00 |
| O    |       |     |     |     |        |         |        |      |      |
| ATOM | 12500 | N   | PHE | 382 | 32.555 | -64.660 | 60.380 | 1.00 | 0.00 |
| N    |       |     |     |     |        |         |        |      |      |
| ATOM | 12501 | CA  | PHE | 382 | 31.336 | -64.316 | 61.074 | 1.00 | 0.00 |
| C    |       |     |     |     |        |         |        |      |      |
| ATOM | 12502 | CB  | PHE | 382 | 30.615 | -65.522 | 61.630 | 1.00 | 0.00 |
| C    |       |     |     |     |        |         |        |      |      |
| ATOM | 12503 | CG  | PHE | 382 | 30.005 | -66.445 | 60.556 | 1.00 | 0.00 |
| C    |       |     |     |     |        |         |        |      |      |
| ATOM | 12504 | CD1 | PHE | 382 | 30.292 | -67.808 | 60.556 | 1.00 | 0.00 |
| C    |       |     |     |     |        |         |        |      |      |
| ATOM | 12505 | CE1 | PHE | 382 | 29.876 | -68.667 | 59.532 | 1.00 | 0.00 |
| C    |       |     |     |     |        |         |        |      |      |
| ATOM | 12506 | CZ  | PHE | 382 | 28.902 | -68.179 | 58.633 | 1.00 | 0.00 |
| C    |       |     |     |     |        |         |        |      |      |
| ATOM | 12507 | CE2 | PHE | 382 | 28.416 | -66.833 | 58.678 | 1.00 | 0.00 |
| C    |       |     |     |     |        |         |        |      |      |
| ATOM | 12508 | CD2 | PHE | 382 | 28.989 | -65.968 | 59.670 | 1.00 | 0.00 |
| C    |       |     |     |     |        |         |        |      |      |
| ATOM | 12509 | C   | PHE | 382 | 31.336 | -63.042 | 61.997 | 1.00 | 0.00 |
| C    |       |     |     |     |        |         |        |      |      |
| ATOM | 12510 | O   | PHE | 382 | 30.325 | -62.578 | 62.601 | 1.00 | 0.00 |
| O    |       |     |     |     |        |         |        |      |      |
| ATOM | 12511 | N   | HID | 383 | 32.514 | -62.274 | 61.973 | 1.00 | 0.00 |
| N    |       |     |     |     |        |         |        |      |      |
| ATOM | 12512 | CA  | HID | 383 | 32.658 | -61.049 | 62.682 | 1.00 | 0.00 |
| C    |       |     |     |     |        |         |        |      |      |
| ATOM | 12513 | CB  | HID | 383 | 34.083 | -60.459 | 62.370 | 1.00 | 0.00 |
| C    |       |     |     |     |        |         |        |      |      |
| ATOM | 12514 | CG  | HID | 383 | 34.482 | -59.722 | 63.564 | 1.00 | 0.00 |
| C    |       |     |     |     |        |         |        |      |      |
| ATOM | 12515 | ND1 | HID | 383 | 34.080 | -58.510 | 64.052 | 1.00 | 0.00 |
| N    |       |     |     |     |        |         |        |      |      |
| ATOM | 12516 | CE1 | HID | 383 | 34.746 | -58.319 | 65.172 | 1.00 | 0.00 |
| C    |       |     |     |     |        |         |        |      |      |
| ATOM | 12517 | NE2 | HID | 383 | 35.503 | -59.335 | 65.528 | 1.00 | 0.00 |
| N    |       |     |     |     |        |         |        |      |      |
| ATOM | 12518 | CD2 | HID | 383 | 35.400 | -60.203 | 64.435 | 1.00 | 0.00 |
| C    |       |     |     |     |        |         |        |      |      |

|      |       |     |     |     |        |         |        |      |      |
|------|-------|-----|-----|-----|--------|---------|--------|------|------|
| ATOM | 12519 | C   | HID | 383 | 31.592 | -59.945 | 62.311 | 1.00 | 0.00 |
| C    |       |     |     |     |        |         |        |      |      |
| ATOM | 12520 | O   | HID | 383 | 31.324 | -59.044 | 63.129 | 1.00 | 0.00 |
| O    |       |     |     |     |        |         |        |      |      |
| ATOM | 12521 | N   | CYS | 384 | 30.903 | -60.070 | 61.161 | 1.00 | 0.00 |
| N    |       |     |     |     |        |         |        |      |      |
| ATOM | 12522 | CA  | CYS | 384 | 29.678 | -59.299 | 60.854 | 1.00 | 0.00 |
| C    |       |     |     |     |        |         |        |      |      |
| ATOM | 12523 | CB  | CYS | 384 | 29.204 | -59.570 | 59.407 | 1.00 | 0.00 |
| C    |       |     |     |     |        |         |        |      |      |
| ATOM | 12524 | SG  | CYS | 384 | 29.048 | -61.378 | 59.120 | 1.00 | 0.00 |
| S    |       |     |     |     |        |         |        |      |      |
| ATOM | 12525 | C   | CYS | 384 | 28.418 | -59.544 | 61.780 | 1.00 | 0.00 |
| C    |       |     |     |     |        |         |        |      |      |
| ATOM | 12526 | O   | CYS | 384 | 27.747 | -58.526 | 62.123 | 1.00 | 0.00 |
| O    |       |     |     |     |        |         |        |      |      |
| ATOM | 12527 | N   | ALA | 385 | 28.194 | -60.758 | 62.235 | 1.00 | 0.00 |
| N    |       |     |     |     |        |         |        |      |      |
| ATOM | 12528 | CA  | ALA | 385 | 27.225 | -61.055 | 63.293 | 1.00 | 0.00 |
| C    |       |     |     |     |        |         |        |      |      |
| ATOM | 12529 | CB  | ALA | 385 | 27.036 | -62.612 | 63.234 | 1.00 | 0.00 |
| C    |       |     |     |     |        |         |        |      |      |
| ATOM | 12530 | C   | ALA | 385 | 27.599 | -60.578 | 64.697 | 1.00 | 0.00 |
| C    |       |     |     |     |        |         |        |      |      |
| ATOM | 12531 | O   | ALA | 385 | 26.725 | -60.577 | 65.505 | 1.00 | 0.00 |
| O    |       |     |     |     |        |         |        |      |      |
| ATOM | 12532 | N   | ASN | 386 | 28.835 | -60.142 | 64.918 | 1.00 | 0.00 |
| N    |       |     |     |     |        |         |        |      |      |
| ATOM | 12533 | CA  | ASN | 386 | 29.161 | -59.515 | 66.184 | 1.00 | 0.00 |
| C    |       |     |     |     |        |         |        |      |      |
| ATOM | 12534 | CB  | ASN | 386 | 30.636 | -59.809 | 66.564 | 1.00 | 0.00 |
| C    |       |     |     |     |        |         |        |      |      |
| ATOM | 12535 | CG  | ASN | 386 | 30.974 | -61.259 | 66.861 | 1.00 | 0.00 |
| C    |       |     |     |     |        |         |        |      |      |
| ATOM | 12536 | OD1 | ASN | 386 | 30.585 | -62.251 | 66.225 | 1.00 | 0.00 |
| O    |       |     |     |     |        |         |        |      |      |
| ATOM | 12537 | ND2 | ASN | 386 | 31.807 | -61.477 | 67.814 | 1.00 | 0.00 |
| N    |       |     |     |     |        |         |        |      |      |
| ATOM | 12538 | C   | ASN | 386 | 28.883 | -58.056 | 66.140 | 1.00 | 0.00 |
| C    |       |     |     |     |        |         |        |      |      |
| ATOM | 12539 | O   | ASN | 386 | 28.442 | -57.483 | 67.151 | 1.00 | 0.00 |
| O    |       |     |     |     |        |         |        |      |      |
| ATOM | 12540 | N   | LEU | 387 | 28.983 | -57.454 | 64.987 | 1.00 | 0.00 |
| N    |       |     |     |     |        |         |        |      |      |
| ATOM | 12541 | CA  | LEU | 387 | 28.996 | -56.008 | 64.707 | 1.00 | 0.00 |
| C    |       |     |     |     |        |         |        |      |      |
| ATOM | 12542 | CB  | LEU | 387 | 30.441 | -55.586 | 64.172 | 1.00 | 0.00 |
| C    |       |     |     |     |        |         |        |      |      |
| ATOM | 12543 | CG  | LEU | 387 | 31.658 | -55.701 | 65.080 | 1.00 | 0.00 |
| C    |       |     |     |     |        |         |        |      |      |
| ATOM | 12544 | CD1 | LEU | 387 | 32.895 | -55.075 | 64.499 | 1.00 | 0.00 |
| C    |       |     |     |     |        |         |        |      |      |
| ATOM | 12545 | CD2 | LEU | 387 | 31.308 | -54.942 | 66.437 | 1.00 | 0.00 |
| C    |       |     |     |     |        |         |        |      |      |

|      |       |     |     |     |        |         |        |      |      |
|------|-------|-----|-----|-----|--------|---------|--------|------|------|
| ATOM | 12546 | C   | LEU | 387 | 27.837 | -55.427 | 63.828 | 1.00 | 0.00 |
| C    |       |     |     |     |        |         |        |      |      |
| ATOM | 12547 | O   | LEU | 387 | 27.939 | -54.318 | 63.364 | 1.00 | 0.00 |
| O    |       |     |     |     |        |         |        |      |      |
| ATOM | 12548 | N   | THR | 388 | 26.759 | -56.190 | 63.664 | 1.00 | 0.00 |
| N    |       |     |     |     |        |         |        |      |      |
| ATOM | 12549 | CA  | THR | 388 | 25.504 | -55.755 | 63.008 | 1.00 | 0.00 |
| C    |       |     |     |     |        |         |        |      |      |
| ATOM | 12550 | CB  | THR | 388 | 25.577 | -55.886 | 61.470 | 1.00 | 0.00 |
| C    |       |     |     |     |        |         |        |      |      |
| ATOM | 12551 | CG2 | THR | 388 | 26.667 | -55.021 | 60.715 | 1.00 | 0.00 |
| C    |       |     |     |     |        |         |        |      |      |
| ATOM | 12552 | OG1 | THR | 388 | 25.723 | -57.253 | 61.044 | 1.00 | 0.00 |
| O    |       |     |     |     |        |         |        |      |      |
| ATOM | 12553 | C   | THR | 388 | 24.316 | -56.563 | 63.573 | 1.00 | 0.00 |
| C    |       |     |     |     |        |         |        |      |      |
| ATOM | 12554 | O   | THR | 388 | 24.578 | -57.584 | 64.128 | 1.00 | 0.00 |
| O    |       |     |     |     |        |         |        |      |      |
| ATOM | 12555 | N   | SER | 389 | 23.056 | -56.132 | 63.360 | 1.00 | 0.00 |
| N    |       |     |     |     |        |         |        |      |      |
| ATOM | 12556 | CA  | SER | 389 | 21.807 | -56.763 | 63.922 | 1.00 | 0.00 |
| C    |       |     |     |     |        |         |        |      |      |
| ATOM | 12557 | CB  | SER | 389 | 20.597 | -55.793 | 63.720 | 1.00 | 0.00 |
| C    |       |     |     |     |        |         |        |      |      |
| ATOM | 12558 | OG  | SER | 389 | 20.217 | -55.664 | 62.336 | 1.00 | 0.00 |
| O    |       |     |     |     |        |         |        |      |      |
| ATOM | 12559 | C   | SER | 389 | 21.502 | -58.166 | 63.321 | 1.00 | 0.00 |
| C    |       |     |     |     |        |         |        |      |      |
| ATOM | 12560 | O   | SER | 389 | 20.688 | -58.930 | 63.902 | 1.00 | 0.00 |
| O    |       |     |     |     |        |         |        |      |      |
| ATOM | 12561 | N   | TRP | 390 | 22.025 | -58.572 | 62.137 | 1.00 | 0.00 |
| N    |       |     |     |     |        |         |        |      |      |
| ATOM | 12562 | CA  | TRP | 390 | 21.804 | -59.986 | 61.744 | 1.00 | 0.00 |
| C    |       |     |     |     |        |         |        |      |      |
| ATOM | 12563 | CB  | TRP | 390 | 21.969 | -60.293 | 60.258 | 1.00 | 0.00 |
| C    |       |     |     |     |        |         |        |      |      |
| ATOM | 12564 | CG  | TRP | 390 | 20.900 | -59.876 | 59.271 | 1.00 | 0.00 |
| C    |       |     |     |     |        |         |        |      |      |
| ATOM | 12565 | CD1 | TRP | 390 | 19.796 | -59.211 | 59.551 | 1.00 | 0.00 |
| C    |       |     |     |     |        |         |        |      |      |
| ATOM | 12566 | NE1 | TRP | 390 | 19.057 | -59.072 | 58.361 | 1.00 | 0.00 |
| N    |       |     |     |     |        |         |        |      |      |
| ATOM | 12567 | CE2 | TRP | 390 | 19.665 | -59.758 | 57.274 | 1.00 | 0.00 |
| C    |       |     |     |     |        |         |        |      |      |
| ATOM | 12568 | CZ2 | TRP | 390 | 19.418 | -59.928 | 55.896 | 1.00 | 0.00 |
| C    |       |     |     |     |        |         |        |      |      |
| ATOM | 12569 | CH2 | TRP | 390 | 20.336 | -60.597 | 55.098 | 1.00 | 0.00 |
| C    |       |     |     |     |        |         |        |      |      |
| ATOM | 12570 | CZ3 | TRP | 390 | 21.589 | -61.076 | 55.631 | 1.00 | 0.00 |
| C    |       |     |     |     |        |         |        |      |      |
| ATOM | 12571 | CE3 | TRP | 390 | 21.761 | -60.943 | 57.010 | 1.00 | 0.00 |
| C    |       |     |     |     |        |         |        |      |      |
| ATOM | 12572 | CD2 | TRP | 390 | 20.920 | -60.240 | 57.856 | 1.00 | 0.00 |
| C    |       |     |     |     |        |         |        |      |      |

|      |       |     |     |     |        |         |        |      |      |
|------|-------|-----|-----|-----|--------|---------|--------|------|------|
| ATOM | 12573 | C   | TRP | 390 | 22.600 | -61.009 | 62.548 | 1.00 | 0.00 |
| C    |       |     |     |     |        |         |        |      |      |
| ATOM | 12574 | O   | TRP | 390 | 23.749 | -60.609 | 62.942 | 1.00 | 0.00 |
| O    |       |     |     |     |        |         |        |      |      |
| ATOM | 12575 | N   | PRO | 391 | 22.089 | -62.203 | 62.900 | 1.00 | 0.00 |
| N    |       |     |     |     |        |         |        |      |      |
| ATOM | 12576 | CD  | PRO | 391 | 20.710 | -62.652 | 62.593 | 1.00 | 0.00 |
| C    |       |     |     |     |        |         |        |      |      |
| ATOM | 12577 | CG  | PRO | 391 | 20.438 | -64.062 | 63.068 | 1.00 | 0.00 |
| C    |       |     |     |     |        |         |        |      |      |
| ATOM | 12578 | CB  | PRO | 391 | 21.567 | -64.103 | 64.096 | 1.00 | 0.00 |
| C    |       |     |     |     |        |         |        |      |      |
| ATOM | 12579 | CA  | PRO | 391 | 22.741 | -63.255 | 63.620 | 1.00 | 0.00 |
| C    |       |     |     |     |        |         |        |      |      |
| ATOM | 12580 | C   | PRO | 391 | 23.623 | -64.111 | 62.704 | 1.00 | 0.00 |
| C    |       |     |     |     |        |         |        |      |      |
| ATOM | 12581 | O   | PRO | 391 | 23.466 | -64.111 | 61.474 | 1.00 | 0.00 |
| O    |       |     |     |     |        |         |        |      |      |
| ATOM | 12582 | N   | ARG | 392 | 24.598 | -64.821 | 63.325 | 1.00 | 0.00 |
| N    |       |     |     |     |        |         |        |      |      |
| ATOM | 12583 | CA  | ARG | 392 | 25.390 | -65.832 | 62.645 | 1.00 | 0.00 |
| C    |       |     |     |     |        |         |        |      |      |
| ATOM | 12584 | CB  | ARG | 392 | 26.325 | -66.535 | 63.697 | 1.00 | 0.00 |
| C    |       |     |     |     |        |         |        |      |      |
| ATOM | 12585 | CG  | ARG | 392 | 27.200 | -67.608 | 63.092 | 1.00 | 0.00 |
| C    |       |     |     |     |        |         |        |      |      |
| ATOM | 12586 | CD  | ARG | 392 | 28.498 | -68.010 | 63.858 | 1.00 | 0.00 |
| C    |       |     |     |     |        |         |        |      |      |
| ATOM | 12587 | NE  | ARG | 392 | 28.954 | -69.310 | 63.429 | 1.00 | 0.00 |
| N    |       |     |     |     |        |         |        |      |      |
| ATOM | 12588 | CZ  | ARG | 392 | 30.150 | -69.802 | 63.523 | 1.00 | 0.00 |
| C    |       |     |     |     |        |         |        |      |      |
| ATOM | 12589 | NH1 | ARG | 392 | 31.049 | -69.176 | 64.155 | 1.00 | 0.00 |
| N    |       |     |     |     |        |         |        |      |      |
| ATOM | 12590 | NH2 | ARG | 392 | 30.418 | -70.930 | 62.969 | 1.00 | 0.00 |
| N1+  |       |     |     |     |        |         |        |      |      |
| ATOM | 12591 | C   | ARG | 392 | 24.535 | -66.866 | 61.854 | 1.00 | 0.00 |
| C    |       |     |     |     |        |         |        |      |      |
| ATOM | 12592 | O   | ARG | 392 | 24.960 | -67.127 | 60.764 | 1.00 | 0.00 |
| O    |       |     |     |     |        |         |        |      |      |
| ATOM | 12593 | N   | TRP | 393 | 23.396 | -67.416 | 62.365 | 1.00 | 0.00 |
| N    |       |     |     |     |        |         |        |      |      |
| ATOM | 12594 | CA  | TRP | 393 | 22.549 | -68.372 | 61.667 | 1.00 | 0.00 |
| C    |       |     |     |     |        |         |        |      |      |
| ATOM | 12595 | CB  | TRP | 393 | 21.399 | -68.840 | 62.527 | 1.00 | 0.00 |
| C    |       |     |     |     |        |         |        |      |      |
| ATOM | 12596 | CG  | TRP | 393 | 20.207 | -67.983 | 62.832 | 1.00 | 0.00 |
| C    |       |     |     |     |        |         |        |      |      |
| ATOM | 12597 | CD1 | TRP | 393 | 19.916 | -67.455 | 64.025 | 1.00 | 0.00 |
| C    |       |     |     |     |        |         |        |      |      |
| ATOM | 12598 | NE1 | TRP | 393 | 18.830 | -66.679 | 63.872 | 1.00 | 0.00 |
| N    |       |     |     |     |        |         |        |      |      |
| ATOM | 12599 | CE2 | TRP | 393 | 18.256 | -66.778 | 62.621 | 1.00 | 0.00 |
| C    |       |     |     |     |        |         |        |      |      |

|      |       |     |     |     |        |         |        |      |      |
|------|-------|-----|-----|-----|--------|---------|--------|------|------|
| ATOM | 12600 | CZ2 | TRP | 393 | 17.113 | -66.232 | 61.975 | 1.00 | 0.00 |
| C    |       |     |     |     |        |         |        |      |      |
| ATOM | 12601 | CH2 | TRP | 393 | 16.762 | -66.585 | 60.683 | 1.00 | 0.00 |
| C    |       |     |     |     |        |         |        |      |      |
| ATOM | 12602 | CZ3 | TRP | 393 | 17.477 | -67.496 | 59.941 | 1.00 | 0.00 |
| C    |       |     |     |     |        |         |        |      |      |
| ATOM | 12603 | CE3 | TRP | 393 | 18.644 | -68.025 | 60.585 | 1.00 | 0.00 |
| C    |       |     |     |     |        |         |        |      |      |
| ATOM | 12604 | CD2 | TRP | 393 | 19.098 | -67.644 | 61.907 | 1.00 | 0.00 |
| C    |       |     |     |     |        |         |        |      |      |
| ATOM | 12605 | C   | TRP | 393 | 22.024 | -67.745 | 60.397 | 1.00 | 0.00 |
| C    |       |     |     |     |        |         |        |      |      |
| ATOM | 12606 | O   | TRP | 393 | 22.039 | -68.487 | 59.349 | 1.00 | 0.00 |
| O    |       |     |     |     |        |         |        |      |      |
| ATOM | 12607 | N   | LEU | 394 | 21.689 | -66.448 | 60.329 | 1.00 | 0.00 |
| N    |       |     |     |     |        |         |        |      |      |
| ATOM | 12608 | CA  | LEU | 394 | 21.110 | -65.939 | 59.115 | 1.00 | 0.00 |
| C    |       |     |     |     |        |         |        |      |      |
| ATOM | 12609 | CB  | LEU | 394 | 20.327 | -64.640 | 59.487 | 1.00 | 0.00 |
| C    |       |     |     |     |        |         |        |      |      |
| ATOM | 12610 | CG  | LEU | 394 | 19.730 | -63.825 | 58.316 | 1.00 | 0.00 |
| C    |       |     |     |     |        |         |        |      |      |
| ATOM | 12611 | CD1 | LEU | 394 | 18.894 | -64.642 | 57.333 | 1.00 | 0.00 |
| C    |       |     |     |     |        |         |        |      |      |
| ATOM | 12612 | CD2 | LEU | 394 | 18.825 | -62.751 | 58.867 | 1.00 | 0.00 |
| C    |       |     |     |     |        |         |        |      |      |
| ATOM | 12613 | C   | LEU | 394 | 22.226 | -65.710 | 58.131 | 1.00 | 0.00 |
| C    |       |     |     |     |        |         |        |      |      |
| ATOM | 12614 | O   | LEU | 394 | 22.038 | -66.034 | 56.947 | 1.00 | 0.00 |
| O    |       |     |     |     |        |         |        |      |      |
| ATOM | 12615 | N   | TYR | 395 | 23.452 | -65.158 | 58.463 | 1.00 | 0.00 |
| N    |       |     |     |     |        |         |        |      |      |
| ATOM | 12616 | CA  | TYR | 395 | 24.543 | -65.026 | 57.519 | 1.00 | 0.00 |
| C    |       |     |     |     |        |         |        |      |      |
| ATOM | 12617 | CB  | TYR | 395 | 25.727 | -64.330 | 58.173 | 1.00 | 0.00 |
| C    |       |     |     |     |        |         |        |      |      |
| ATOM | 12618 | CG  | TYR | 395 | 25.560 | -62.765 | 58.351 | 1.00 | 0.00 |
| C    |       |     |     |     |        |         |        |      |      |
| ATOM | 12619 | CD1 | TYR | 395 | 25.719 | -61.941 | 57.190 | 1.00 | 0.00 |
| C    |       |     |     |     |        |         |        |      |      |
| ATOM | 12620 | CE1 | TYR | 395 | 25.628 | -60.575 | 57.290 | 1.00 | 0.00 |
| C    |       |     |     |     |        |         |        |      |      |
| ATOM | 12621 | CZ  | TYR | 395 | 25.384 | -59.970 | 58.587 | 1.00 | 0.00 |
| C    |       |     |     |     |        |         |        |      |      |
| ATOM | 12622 | OH  | TYR | 395 | 25.241 | -58.578 | 58.673 | 1.00 | 0.00 |
| O    |       |     |     |     |        |         |        |      |      |
| ATOM | 12623 | CE2 | TYR | 395 | 25.260 | -60.776 | 59.724 | 1.00 | 0.00 |
| C    |       |     |     |     |        |         |        |      |      |
| ATOM | 12624 | CD2 | TYR | 395 | 25.306 | -62.162 | 59.610 | 1.00 | 0.00 |
| C    |       |     |     |     |        |         |        |      |      |
| ATOM | 12625 | C   | TYR | 395 | 24.968 | -66.450 | 56.942 | 1.00 | 0.00 |
| C    |       |     |     |     |        |         |        |      |      |
| ATOM | 12626 | O   | TYR | 395 | 25.334 | -66.497 | 55.782 | 1.00 | 0.00 |
| O    |       |     |     |     |        |         |        |      |      |

|      |       |     |     |     |        |         |        |      |      |
|------|-------|-----|-----|-----|--------|---------|--------|------|------|
| ATOM | 12627 | N   | SER | 396 | 24.861 | -67.557 | 57.737 | 1.00 | 0.00 |
| N    |       |     |     |     |        |         |        |      |      |
| ATOM | 12628 | CA  | SER | 396 | 25.224 | -68.918 | 57.312 | 1.00 | 0.00 |
| C    |       |     |     |     |        |         |        |      |      |
| ATOM | 12629 | CB  | SER | 396 | 25.207 | -69.768 | 58.577 | 1.00 | 0.00 |
| C    |       |     |     |     |        |         |        |      |      |
| ATOM | 12630 | OG  | SER | 396 | 26.099 | -69.306 | 59.571 | 1.00 | 0.00 |
| O    |       |     |     |     |        |         |        |      |      |
| ATOM | 12631 | C   | SER | 396 | 24.262 | -69.515 | 56.323 | 1.00 | 0.00 |
| C    |       |     |     |     |        |         |        |      |      |
| ATOM | 12632 | O   | SER | 396 | 24.633 | -70.497 | 55.714 | 1.00 | 0.00 |
| O    |       |     |     |     |        |         |        |      |      |
| ATOM | 12633 | N   | LEU | 397 | 23.121 | -68.892 | 56.071 | 1.00 | 0.00 |
| N    |       |     |     |     |        |         |        |      |      |
| ATOM | 12634 | CA  | LEU | 397 | 22.360 | -69.161 | 54.860 | 1.00 | 0.00 |
| C    |       |     |     |     |        |         |        |      |      |
| ATOM | 12635 | CB  | LEU | 397 | 20.845 | -69.378 | 55.385 | 1.00 | 0.00 |
| C    |       |     |     |     |        |         |        |      |      |
| ATOM | 12636 | CG  | LEU | 397 | 20.628 | -70.550 | 56.325 | 1.00 | 0.00 |
| C    |       |     |     |     |        |         |        |      |      |
| ATOM | 12637 | CD1 | LEU | 397 | 19.414 | -70.259 | 57.229 | 1.00 | 0.00 |
| C    |       |     |     |     |        |         |        |      |      |
| ATOM | 12638 | CD2 | LEU | 397 | 20.470 | -71.901 | 55.510 | 1.00 | 0.00 |
| C    |       |     |     |     |        |         |        |      |      |
| ATOM | 12639 | C   | LEU | 397 | 22.553 | -68.103 | 53.722 | 1.00 | 0.00 |
| C    |       |     |     |     |        |         |        |      |      |
| ATOM | 12640 | O   | LEU | 397 | 21.694 | -68.093 | 52.843 | 1.00 | 0.00 |
| O    |       |     |     |     |        |         |        |      |      |
| ATOM | 12641 | N   | TYR | 398 | 23.613 | -67.220 | 53.665 | 1.00 | 0.00 |
| N    |       |     |     |     |        |         |        |      |      |
| ATOM | 12642 | CA  | TYR | 398 | 23.823 | -66.303 | 52.590 | 1.00 | 0.00 |
| C    |       |     |     |     |        |         |        |      |      |
| ATOM | 12643 | CB  | TYR | 398 | 23.369 | -64.902 | 53.064 | 1.00 | 0.00 |
| C    |       |     |     |     |        |         |        |      |      |
| ATOM | 12644 | CG  | TYR | 398 | 21.836 | -64.567 | 52.927 | 1.00 | 0.00 |
| C    |       |     |     |     |        |         |        |      |      |
| ATOM | 12645 | CD1 | TYR | 398 | 21.286 | -64.605 | 51.621 | 1.00 | 0.00 |
| C    |       |     |     |     |        |         |        |      |      |
| ATOM | 12646 | CE1 | TYR | 398 | 19.986 | -64.243 | 51.404 | 1.00 | 0.00 |
| C    |       |     |     |     |        |         |        |      |      |
| ATOM | 12647 | CZ  | TYR | 398 | 19.144 | -63.917 | 52.483 | 1.00 | 0.00 |
| C    |       |     |     |     |        |         |        |      |      |
| ATOM | 12648 | OH  | TYR | 398 | 17.827 | -63.607 | 52.260 | 1.00 | 0.00 |
| O    |       |     |     |     |        |         |        |      |      |
| ATOM | 12649 | CE2 | TYR | 398 | 19.648 | -63.793 | 53.800 | 1.00 | 0.00 |
| C    |       |     |     |     |        |         |        |      |      |
| ATOM | 12650 | CD2 | TYR | 398 | 21.007 | -64.173 | 54.034 | 1.00 | 0.00 |
| C    |       |     |     |     |        |         |        |      |      |
| ATOM | 12651 | C   | TYR | 398 | 25.396 | -66.300 | 52.202 | 1.00 | 0.00 |
| C    |       |     |     |     |        |         |        |      |      |
| ATOM | 12652 | O   | TYR | 398 | 25.747 | -65.684 | 51.234 | 1.00 | 0.00 |
| O    |       |     |     |     |        |         |        |      |      |
| ATOM | 12653 | N   | ASP | 399 | 26.250 | -67.052 | 52.938 | 1.00 | 0.00 |
| N    |       |     |     |     |        |         |        |      |      |



|      |       |     |     |     |        |         |        |      |      |
|------|-------|-----|-----|-----|--------|---------|--------|------|------|
| ATOM | 12654 | CA  | ASP | 399 | 27.509 | -67.616 | 52.505 | 1.00 | 0.00 |
| C    |       |     |     |     |        |         |        |      |      |
| ATOM | 12655 | CB  | ASP | 399 | 28.329 | -67.778 | 53.817 | 1.00 | 0.00 |
| C    |       |     |     |     |        |         |        |      |      |
| ATOM | 12656 | CG  | ASP | 399 | 29.729 | -68.398 | 53.594 | 1.00 | 0.00 |
| C    |       |     |     |     |        |         |        |      |      |
| ATOM | 12657 | OD1 | ASP | 399 | 30.012 | -69.403 | 54.220 | 1.00 | 0.00 |
| O    |       |     |     |     |        |         |        |      |      |
| ATOM | 12658 | OD2 | ASP | 399 | 30.507 | -67.822 | 52.791 | 1.00 | 0.00 |
| O1-  |       |     |     |     |        |         |        |      |      |
| ATOM | 12659 | C   | ASP | 399 | 27.296 | -68.947 | 51.814 | 1.00 | 0.00 |
| C    |       |     |     |     |        |         |        |      |      |
| ATOM | 12660 | O   | ASP | 399 | 26.910 | -69.923 | 52.392 | 1.00 | 0.00 |
| O    |       |     |     |     |        |         |        |      |      |
| ATOM | 12661 | N   | ALA | 400 | 27.703 | -69.035 | 50.574 | 1.00 | 0.00 |
| N    |       |     |     |     |        |         |        |      |      |
| ATOM | 12662 | CA  | ALA | 400 | 27.570 | -70.233 | 49.749 | 1.00 | 0.00 |
| C    |       |     |     |     |        |         |        |      |      |
| ATOM | 12663 | CB  | ALA | 400 | 28.012 | -69.841 | 48.297 | 1.00 | 0.00 |
| C    |       |     |     |     |        |         |        |      |      |
| ATOM | 12664 | C   | ALA | 400 | 28.478 | -71.306 | 50.304 | 1.00 | 0.00 |
| C    |       |     |     |     |        |         |        |      |      |
| ATOM | 12665 | O   | ALA | 400 | 28.131 | -72.468 | 50.206 | 1.00 | 0.00 |
| O    |       |     |     |     |        |         |        |      |      |
| ATOM | 12666 | N   | GLU | 401 | 29.622 | -70.980 | 50.921 | 1.00 | 0.00 |
| N    |       |     |     |     |        |         |        |      |      |
| ATOM | 12667 | CA  | GLU | 401 | 30.461 | -71.948 | 51.620 | 1.00 | 0.00 |
| C    |       |     |     |     |        |         |        |      |      |
| ATOM | 12668 | CB  | GLU | 401 | 31.831 | -71.335 | 51.850 | 1.00 | 0.00 |
| C    |       |     |     |     |        |         |        |      |      |
| ATOM | 12669 | CG  | GLU | 401 | 32.874 | -72.360 | 52.198 | 1.00 | 0.00 |
| C    |       |     |     |     |        |         |        |      |      |
| ATOM | 12670 | CD  | GLU | 401 | 34.305 | -71.783 | 52.414 | 1.00 | 0.00 |
| C    |       |     |     |     |        |         |        |      |      |
| ATOM | 12671 | OE1 | GLU | 401 | 34.434 | -70.549 | 52.293 | 1.00 | 0.00 |
| O    |       |     |     |     |        |         |        |      |      |
| ATOM | 12672 | OE2 | GLU | 401 | 35.316 | -72.569 | 52.626 | 1.00 | 0.00 |
| O1-  |       |     |     |     |        |         |        |      |      |
| ATOM | 12673 | C   | GLU | 401 | 29.800 | -72.615 | 52.886 | 1.00 | 0.00 |
| C    |       |     |     |     |        |         |        |      |      |
| ATOM | 12674 | O   | GLU | 401 | 29.955 | -73.880 | 52.960 | 1.00 | 0.00 |
| O    |       |     |     |     |        |         |        |      |      |
| ATOM | 12675 | N   | THR | 402 | 29.110 | -71.951 | 53.784 | 1.00 | 0.00 |
| N    |       |     |     |     |        |         |        |      |      |
| ATOM | 12676 | CA  | THR | 402 | 28.369 | -72.524 | 54.876 | 1.00 | 0.00 |
| C    |       |     |     |     |        |         |        |      |      |
| ATOM | 12677 | CB  | THR | 402 | 28.208 | -71.525 | 56.026 | 1.00 | 0.00 |
| C    |       |     |     |     |        |         |        |      |      |
| ATOM | 12678 | CG2 | THR | 402 | 27.857 | -72.210 | 57.335 | 1.00 | 0.00 |
| C    |       |     |     |     |        |         |        |      |      |
| ATOM | 12679 | OG1 | THR | 402 | 29.392 | -70.768 | 56.266 | 1.00 | 0.00 |
| O    |       |     |     |     |        |         |        |      |      |
| ATOM | 12680 | C   | THR | 402 | 27.056 | -73.204 | 54.448 | 1.00 | 0.00 |
| C    |       |     |     |     |        |         |        |      |      |

|      |       |     |     |     |        |         |        |      |      |
|------|-------|-----|-----|-----|--------|---------|--------|------|------|
| ATOM | 12681 | O   | THR | 402 | 26.585 | -74.101 | 55.165 | 1.00 | 0.00 |
| O    |       |     |     |     |        |         |        |      |      |
| ATOM | 12682 | N   | LEU | 403 | 26.445 | -72.813 | 53.302 | 1.00 | 0.00 |
| N    |       |     |     |     |        |         |        |      |      |
| ATOM | 12683 | CA  | LEU | 403 | 25.279 | -73.548 | 52.715 | 1.00 | 0.00 |
| C    |       |     |     |     |        |         |        |      |      |
| ATOM | 12684 | CB  | LEU | 403 | 24.611 | -72.704 | 51.539 | 1.00 | 0.00 |
| C    |       |     |     |     |        |         |        |      |      |
| ATOM | 12685 | CG  | LEU | 403 | 23.839 | -71.594 | 52.101 | 1.00 | 0.00 |
| C    |       |     |     |     |        |         |        |      |      |
| ATOM | 12686 | CD1 | LEU | 403 | 23.646 | -70.477 | 51.042 | 1.00 | 0.00 |
| C    |       |     |     |     |        |         |        |      |      |
| ATOM | 12687 | CD2 | LEU | 403 | 22.351 | -72.161 | 52.441 | 1.00 | 0.00 |
| C    |       |     |     |     |        |         |        |      |      |
| ATOM | 12688 | C   | LEU | 403 | 25.808 | -74.800 | 52.048 | 1.00 | 0.00 |
| C    |       |     |     |     |        |         |        |      |      |
| ATOM | 12689 | O   | LEU | 403 | 25.245 | -75.867 | 52.249 | 1.00 | 0.00 |
| O    |       |     |     |     |        |         |        |      |      |
| ATOM | 12690 | N   | MET | 404 | 26.950 | -74.737 | 51.321 | 1.00 | 0.00 |
| N    |       |     |     |     |        |         |        |      |      |
| ATOM | 12691 | CA  | MET | 404 | 27.477 | -75.992 | 50.698 | 1.00 | 0.00 |
| C    |       |     |     |     |        |         |        |      |      |
| ATOM | 12692 | CB  | MET | 404 | 28.644 | -75.588 | 49.741 | 1.00 | 0.00 |
| C    |       |     |     |     |        |         |        |      |      |
| ATOM | 12693 | CG  | MET | 404 | 28.149 | -75.089 | 48.385 | 1.00 | 0.00 |
| C    |       |     |     |     |        |         |        |      |      |
| ATOM | 12694 | SD  | MET | 404 | 29.451 | -74.866 | 47.058 | 1.00 | 0.00 |
| S    |       |     |     |     |        |         |        |      |      |
| ATOM | 12695 | CE  | MET | 404 | 30.129 | -73.369 | 47.838 | 1.00 | 0.00 |
| C    |       |     |     |     |        |         |        |      |      |
| ATOM | 12696 | C   | MET | 404 | 27.882 | -76.938 | 51.785 | 1.00 | 0.00 |
| C    |       |     |     |     |        |         |        |      |      |
| ATOM | 12697 | O   | MET | 404 | 27.673 | -78.135 | 51.582 | 1.00 | 0.00 |
| O    |       |     |     |     |        |         |        |      |      |
| ATOM | 12698 | N   | ASP | 405 | 28.350 | -76.418 | 52.937 | 1.00 | 0.00 |
| N    |       |     |     |     |        |         |        |      |      |
| ATOM | 12699 | CA  | ASP | 405 | 28.698 | -77.273 | 54.049 | 1.00 | 0.00 |
| C    |       |     |     |     |        |         |        |      |      |
| ATOM | 12700 | CB  | ASP | 405 | 29.344 | -76.379 | 55.084 | 1.00 | 0.00 |
| C    |       |     |     |     |        |         |        |      |      |
| ATOM | 12701 | CG  | ASP | 405 | 30.105 | -77.289 | 56.153 | 1.00 | 0.00 |
| C    |       |     |     |     |        |         |        |      |      |
| ATOM | 12702 | OD1 | ASP | 405 | 29.762 | -77.144 | 57.308 | 1.00 | 0.00 |
| O    |       |     |     |     |        |         |        |      |      |
| ATOM | 12703 | OD2 | ASP | 405 | 30.948 | -78.126 | 55.856 | 1.00 | 0.00 |
| O1-  |       |     |     |     |        |         |        |      |      |
| ATOM | 12704 | C   | ASP | 405 | 27.529 | -78.066 | 54.599 | 1.00 | 0.00 |
| C    |       |     |     |     |        |         |        |      |      |
| ATOM | 12705 | O   | ASP | 405 | 27.777 | -79.176 | 54.996 | 1.00 | 0.00 |
| O    |       |     |     |     |        |         |        |      |      |
| ATOM | 12706 | N   | ARG | 406 | 26.372 | -77.455 | 54.752 | 1.00 | 0.00 |
| N    |       |     |     |     |        |         |        |      |      |
| ATOM | 12707 | CA  | ARG | 406 | 25.132 | -78.077 | 55.260 | 1.00 | 0.00 |
| C    |       |     |     |     |        |         |        |      |      |

|      |       |     |     |     |        |         |        |      |      |
|------|-------|-----|-----|-----|--------|---------|--------|------|------|
| ATOM | 12708 | CB  | ARG | 406 | 24.083 | -76.995 | 55.649 | 1.00 | 0.00 |
| C    |       |     |     |     |        |         |        |      |      |
| ATOM | 12709 | CG  | ARG | 406 | 23.102 | -77.540 | 56.729 | 1.00 | 0.00 |
| C    |       |     |     |     |        |         |        |      |      |
| ATOM | 12710 | CD  | ARG | 406 | 23.602 | -77.691 | 58.137 | 1.00 | 0.00 |
| C    |       |     |     |     |        |         |        |      |      |
| ATOM | 12711 | NE  | ARG | 406 | 22.564 | -78.244 | 58.977 | 1.00 | 0.00 |
| N    |       |     |     |     |        |         |        |      |      |
| ATOM | 12712 | CZ  | ARG | 406 | 21.560 | -77.661 | 59.617 | 1.00 | 0.00 |
| C    |       |     |     |     |        |         |        |      |      |
| ATOM | 12713 | NH1 | ARG | 406 | 21.279 | -76.401 | 59.572 | 1.00 | 0.00 |
| N    |       |     |     |     |        |         |        |      |      |
| ATOM | 12714 | NH2 | ARG | 406 | 20.650 | -78.489 | 60.146 | 1.00 | 0.00 |
| N1+  |       |     |     |     |        |         |        |      |      |
| ATOM | 12715 | C   | ARG | 406 | 24.637 | -79.049 | 54.230 | 1.00 | 0.00 |
| C    |       |     |     |     |        |         |        |      |      |
| ATOM | 12716 | O   | ARG | 406 | 24.228 | -80.151 | 54.596 | 1.00 | 0.00 |
| O    |       |     |     |     |        |         |        |      |      |
| ATOM | 12717 | N   | ILE | 407 | 24.570 | -78.668 | 52.964 | 1.00 | 0.00 |
| N    |       |     |     |     |        |         |        |      |      |
| ATOM | 12718 | CA  | ILE | 407 | 24.357 | -79.559 | 51.795 | 1.00 | 0.00 |
| C    |       |     |     |     |        |         |        |      |      |
| ATOM | 12719 | CB  | ILE | 407 | 24.603 | -78.848 | 50.409 | 1.00 | 0.00 |
| C    |       |     |     |     |        |         |        |      |      |
| ATOM | 12720 | CG2 | ILE | 407 | 24.723 | -79.754 | 49.203 | 1.00 | 0.00 |
| C    |       |     |     |     |        |         |        |      |      |
| ATOM | 12721 | CG1 | ILE | 407 | 23.475 | -77.797 | 50.334 | 1.00 | 0.00 |
| C    |       |     |     |     |        |         |        |      |      |
| ATOM | 12722 | CD1 | ILE | 407 | 23.650 | -76.771 | 49.191 | 1.00 | 0.00 |
| C    |       |     |     |     |        |         |        |      |      |
| ATOM | 12723 | C   | ILE | 407 | 25.259 | -80.809 | 51.814 | 1.00 | 0.00 |
| C    |       |     |     |     |        |         |        |      |      |
| ATOM | 12724 | O   | ILE | 407 | 24.731 | -81.895 | 51.995 | 1.00 | 0.00 |
| O    |       |     |     |     |        |         |        |      |      |
| ATOM | 12725 | N   | LYS | 408 | 26.554 | -80.670 | 51.822 | 1.00 | 0.00 |
| N    |       |     |     |     |        |         |        |      |      |
| ATOM | 12726 | CA  | LYS | 408 | 27.530 | -81.752 | 52.004 | 1.00 | 0.00 |
| C    |       |     |     |     |        |         |        |      |      |
| ATOM | 12727 | CB  | LYS | 408 | 28.962 | -81.168 | 52.197 | 1.00 | 0.00 |
| C    |       |     |     |     |        |         |        |      |      |
| ATOM | 12728 | CG  | LYS | 408 | 29.598 | -80.794 | 50.796 | 1.00 | 0.00 |
| C    |       |     |     |     |        |         |        |      |      |
| ATOM | 12729 | CD  | LYS | 408 | 30.860 | -79.919 | 51.086 | 1.00 | 0.00 |
| C    |       |     |     |     |        |         |        |      |      |
| ATOM | 12730 | CE  | LYS | 408 | 31.505 | -79.540 | 49.776 | 1.00 | 0.00 |
| C    |       |     |     |     |        |         |        |      |      |
| ATOM | 12731 | NZ  | LYS | 408 | 32.616 | -80.380 | 49.390 | 1.00 | 0.00 |
| N1+  |       |     |     |     |        |         |        |      |      |
| ATOM | 12732 | C   | LYS | 408 | 27.171 | -82.599 | 53.235 | 1.00 | 0.00 |
| C    |       |     |     |     |        |         |        |      |      |
| ATOM | 12733 | O   | LYS | 408 | 27.262 | -83.804 | 53.133 | 1.00 | 0.00 |
| O    |       |     |     |     |        |         |        |      |      |
| ATOM | 12734 | N   | LYS | 409 | 26.765 | -82.002 | 54.317 | 1.00 | 0.00 |
| N    |       |     |     |     |        |         |        |      |      |

|      |       |     |     |     |        |         |        |      |      |
|------|-------|-----|-----|-----|--------|---------|--------|------|------|
| ATOM | 12735 | CA  | LYS | 409 | 26.274 | -82.787 | 55.475 | 1.00 | 0.00 |
| C    |       |     |     |     |        |         |        |      |      |
| ATOM | 12736 | CB  | LYS | 409 | 26.108 | -81.836 | 56.702 | 1.00 | 0.00 |
| C    |       |     |     |     |        |         |        |      |      |
| ATOM | 12737 | CG  | LYS | 409 | 25.989 | -82.598 | 58.021 | 1.00 | 0.00 |
| C    |       |     |     |     |        |         |        |      |      |
| ATOM | 12738 | CD  | LYS | 409 | 26.141 | -81.690 | 59.234 | 1.00 | 0.00 |
| C    |       |     |     |     |        |         |        |      |      |
| ATOM | 12739 | CE  | LYS | 409 | 25.741 | -82.338 | 60.554 | 1.00 | 0.00 |
| C    |       |     |     |     |        |         |        |      |      |
| ATOM | 12740 | NZ  | LYS | 409 | 26.123 | -81.534 | 61.728 | 1.00 | 0.00 |
| N1+  |       |     |     |     |        |         |        |      |      |
| ATOM | 12741 | C   | LYS | 409 | 25.055 | -83.703 | 55.334 | 1.00 | 0.00 |
| C    |       |     |     |     |        |         |        |      |      |
| ATOM | 12742 | O   | LYS | 409 | 25.089 | -84.813 | 55.824 | 1.00 | 0.00 |
| O    |       |     |     |     |        |         |        |      |      |
| ATOM | 12743 | N   | GLN | 410 | 24.021 | -83.235 | 54.700 | 1.00 | 0.00 |
| N    |       |     |     |     |        |         |        |      |      |
| ATOM | 12744 | CA  | GLN | 410 | 22.847 | -84.029 | 54.209 | 1.00 | 0.00 |
| C    |       |     |     |     |        |         |        |      |      |
| ATOM | 12745 | CB  | GLN | 410 | 21.709 | -83.098 | 53.709 | 1.00 | 0.00 |
| C    |       |     |     |     |        |         |        |      |      |
| ATOM | 12746 | CG  | GLN | 410 | 21.229 | -82.050 | 54.756 | 1.00 | 0.00 |
| C    |       |     |     |     |        |         |        |      |      |
| ATOM | 12747 | CD  | GLN | 410 | 19.979 | -82.512 | 55.556 | 1.00 | 0.00 |
| C    |       |     |     |     |        |         |        |      |      |
| ATOM | 12748 | OE1 | GLN | 410 | 19.551 | -83.634 | 55.532 | 1.00 | 0.00 |
| O    |       |     |     |     |        |         |        |      |      |
| ATOM | 12749 | NE2 | GLN | 410 | 19.293 | -81.631 | 56.273 | 1.00 | 0.00 |
| N    |       |     |     |     |        |         |        |      |      |
| ATOM | 12750 | C   | GLN | 410 | 23.253 | -85.033 | 53.142 | 1.00 | 0.00 |
| C    |       |     |     |     |        |         |        |      |      |
| ATOM | 12751 | O   | GLN | 410 | 22.759 | -86.123 | 53.016 | 1.00 | 0.00 |
| O    |       |     |     |     |        |         |        |      |      |
| ATOM | 12752 | N   | LEU | 411 | 24.238 | -84.692 | 52.295 | 1.00 | 0.00 |
| N    |       |     |     |     |        |         |        |      |      |
| ATOM | 12753 | CA  | LEU | 411 | 24.760 | -85.690 | 51.311 | 1.00 | 0.00 |
| C    |       |     |     |     |        |         |        |      |      |
| ATOM | 12754 | CB  | LEU | 411 | 25.637 | -84.954 | 50.266 | 1.00 | 0.00 |
| C    |       |     |     |     |        |         |        |      |      |
| ATOM | 12755 | CG  | LEU | 411 | 24.850 | -83.989 | 49.345 | 1.00 | 0.00 |
| C    |       |     |     |     |        |         |        |      |      |
| ATOM | 12756 | CD1 | LEU | 411 | 25.809 | -82.976 | 48.777 | 1.00 | 0.00 |
| C    |       |     |     |     |        |         |        |      |      |
| ATOM | 12757 | CD2 | LEU | 411 | 24.272 | -84.907 | 48.326 | 1.00 | 0.00 |
| C    |       |     |     |     |        |         |        |      |      |
| ATOM | 12758 | C   | LEU | 411 | 25.616 | -86.809 | 51.880 | 1.00 | 0.00 |
| C    |       |     |     |     |        |         |        |      |      |
| ATOM | 12759 | O   | LEU | 411 | 25.638 | -87.877 | 51.321 | 1.00 | 0.00 |
| O    |       |     |     |     |        |         |        |      |      |
| ATOM | 12760 | N   | ARG | 412 | 26.339 | -86.613 | 52.980 | 1.00 | 0.00 |
| N    |       |     |     |     |        |         |        |      |      |
| ATOM | 12761 | CA  | ARG | 412 | 26.925 | -87.652 | 53.863 | 1.00 | 0.00 |
| C    |       |     |     |     |        |         |        |      |      |

|      |       |     |     |     |        |         |        |      |      |
|------|-------|-----|-----|-----|--------|---------|--------|------|------|
| ATOM | 12762 | CB  | ARG | 412 | 28.014 | -87.033 | 54.767 | 1.00 | 0.00 |
| C    |       |     |     |     |        |         |        |      |      |
| ATOM | 12763 | CG  | ARG | 412 | 29.314 | -86.764 | 54.066 | 1.00 | 0.00 |
| C    |       |     |     |     |        |         |        |      |      |
| ATOM | 12764 | CD  | ARG | 412 | 30.540 | -86.502 | 55.067 | 1.00 | 0.00 |
| C    |       |     |     |     |        |         |        |      |      |
| ATOM | 12765 | NE  | ARG | 412 | 30.174 | -85.611 | 56.175 | 1.00 | 0.00 |
| N    |       |     |     |     |        |         |        |      |      |
| ATOM | 12766 | CZ  | ARG | 412 | 29.914 | -84.331 | 56.160 | 1.00 | 0.00 |
| C    |       |     |     |     |        |         |        |      |      |
| ATOM | 12767 | NH1 | ARG | 412 | 30.148 | -83.596 | 55.124 | 1.00 | 0.00 |
| N    |       |     |     |     |        |         |        |      |      |
| ATOM | 12768 | NH2 | ARG | 412 | 29.424 | -83.676 | 57.173 | 1.00 | 0.00 |
| N1+  |       |     |     |     |        |         |        |      |      |
| ATOM | 12769 | C   | ARG | 412 | 25.906 | -88.439 | 54.742 | 1.00 | 0.00 |
| C    |       |     |     |     |        |         |        |      |      |
| ATOM | 12770 | O   | ARG | 412 | 26.215 | -89.505 | 55.203 | 1.00 | 0.00 |
| O    |       |     |     |     |        |         |        |      |      |
| ATOM | 12771 | N   | GLU | 413 | 24.663 | -87.891 | 54.923 | 1.00 | 0.00 |
| N    |       |     |     |     |        |         |        |      |      |
| ATOM | 12772 | CA  | GLU | 413 | 23.606 | -88.780 | 55.478 | 1.00 | 0.00 |
| C    |       |     |     |     |        |         |        |      |      |
| ATOM | 12773 | CB  | GLU | 413 | 22.352 | -87.977 | 55.684 | 1.00 | 0.00 |
| C    |       |     |     |     |        |         |        |      |      |
| ATOM | 12774 | CG  | GLU | 413 | 21.402 | -88.601 | 56.721 | 1.00 | 0.00 |
| C    |       |     |     |     |        |         |        |      |      |
| ATOM | 12775 | CD  | GLU | 413 | 22.039 | -88.831 | 58.068 | 1.00 | 0.00 |
| C    |       |     |     |     |        |         |        |      |      |
| ATOM | 12776 | OE1 | GLU | 413 | 21.627 | -89.702 | 58.817 | 1.00 | 0.00 |
| O    |       |     |     |     |        |         |        |      |      |
| ATOM | 12777 | OE2 | GLU | 413 | 22.708 | -87.864 | 58.552 | 1.00 | 0.00 |
| O1-  |       |     |     |     |        |         |        |      |      |
| ATOM | 12778 | C   | GLU | 413 | 23.222 | -89.884 | 54.395 | 1.00 | 0.00 |
| C    |       |     |     |     |        |         |        |      |      |
| ATOM | 12779 | O   | GLU | 413 | 22.980 | -91.019 | 54.720 | 1.00 | 0.00 |
| O    |       |     |     |     |        |         |        |      |      |
| ATOM | 12780 | N   | TRP | 414 | 23.310 | -89.569 | 53.065 | 1.00 | 0.00 |
| N    |       |     |     |     |        |         |        |      |      |
| ATOM | 12781 | CA  | TRP | 414 | 23.144 | -90.627 | 52.101 | 1.00 | 0.00 |
| C    |       |     |     |     |        |         |        |      |      |
| ATOM | 12782 | CB  | TRP | 414 | 22.810 | -90.036 | 50.756 | 1.00 | 0.00 |
| C    |       |     |     |     |        |         |        |      |      |
| ATOM | 12783 | CG  | TRP | 414 | 21.774 | -88.926 | 50.667 | 1.00 | 0.00 |
| C    |       |     |     |     |        |         |        |      |      |
| ATOM | 12784 | CD1 | TRP | 414 | 20.786 | -88.777 | 51.560 | 1.00 | 0.00 |
| C    |       |     |     |     |        |         |        |      |      |
| ATOM | 12785 | NE1 | TRP | 414 | 20.110 | -87.609 | 51.284 | 1.00 | 0.00 |
| N    |       |     |     |     |        |         |        |      |      |
| ATOM | 12786 | CE2 | TRP | 414 | 20.431 | -87.165 | 50.002 | 1.00 | 0.00 |
| C    |       |     |     |     |        |         |        |      |      |
| ATOM | 12787 | CZ2 | TRP | 414 | 19.897 | -86.164 | 49.223 | 1.00 | 0.00 |
| C    |       |     |     |     |        |         |        |      |      |
| ATOM | 12788 | CH2 | TRP | 414 | 20.513 | -85.856 | 48.007 | 1.00 | 0.00 |
| C    |       |     |     |     |        |         |        |      |      |

|      |       |     |     |     |        |         |        |      |      |
|------|-------|-----|-----|-----|--------|---------|--------|------|------|
| ATOM | 12789 | CZ3 | TRP | 414 | 21.647 | -86.610 | 47.564 | 1.00 | 0.00 |
| C    |       |     |     |     |        |         |        |      |      |
| ATOM | 12790 | CE3 | TRP | 414 | 22.129 | -87.648 | 48.383 | 1.00 | 0.00 |
| C    |       |     |     |     |        |         |        |      |      |
| ATOM | 12791 | CD2 | TRP | 414 | 21.509 | -88.045 | 49.612 | 1.00 | 0.00 |
| C    |       |     |     |     |        |         |        |      |      |
| ATOM | 12792 | C   | TRP | 414 | 24.459 | -91.416 | 52.054 | 1.00 | 0.00 |
| C    |       |     |     |     |        |         |        |      |      |
| ATOM | 12793 | O   | TRP | 414 | 25.555 | -90.893 | 52.185 | 1.00 | 0.00 |
| O    |       |     |     |     |        |         |        |      |      |
| ATOM | 12794 | N   | ASP | 415 | 24.341 | -92.713 | 51.804 | 1.00 | 0.00 |
| N    |       |     |     |     |        |         |        |      |      |
| ATOM | 12795 | CA  | ASP | 415 | 25.378 | -93.644 | 51.972 | 1.00 | 0.00 |
| C    |       |     |     |     |        |         |        |      |      |
| ATOM | 12796 | CB  | ASP | 415 | 24.888 | -95.045 | 52.447 | 1.00 | 0.00 |
| C    |       |     |     |     |        |         |        |      |      |
| ATOM | 12797 | CG  | ASP | 415 | 25.929 | -95.946 | 53.130 | 1.00 | 0.00 |
| C    |       |     |     |     |        |         |        |      |      |
| ATOM | 12798 | OD1 | ASP | 415 | 26.966 | -95.495 | 53.666 | 1.00 | 0.00 |
| O    |       |     |     |     |        |         |        |      |      |
| ATOM | 12799 | OD2 | ASP | 415 | 25.645 | -97.133 | 53.231 | 1.00 | 0.00 |
| O1-  |       |     |     |     |        |         |        |      |      |
| ATOM | 12800 | C   | ASP | 415 | 26.182 | -93.816 | 50.631 | 1.00 | 0.00 |
| C    |       |     |     |     |        |         |        |      |      |
| ATOM | 12801 | O   | ASP | 415 | 25.662 | -93.434 | 49.555 | 1.00 | 0.00 |
| O    |       |     |     |     |        |         |        |      |      |
| ATOM | 12802 | N   | GLU | 416 | 27.441 | -94.287 | 50.801 | 1.00 | 0.00 |
| N    |       |     |     |     |        |         |        |      |      |
| ATOM | 12803 | CA  | GLU | 416 | 28.365 | -94.614 | 49.699 | 1.00 | 0.00 |
| C    |       |     |     |     |        |         |        |      |      |
| ATOM | 12804 | CB  | GLU | 416 | 28.122 | -95.975 | 49.062 | 1.00 | 0.00 |
| C    |       |     |     |     |        |         |        |      |      |
| ATOM | 12805 | CG  | GLU | 416 | 27.778 | -97.144 | 50.039 | 1.00 | 0.00 |
| C    |       |     |     |     |        |         |        |      |      |
| ATOM | 12806 | CD  | GLU | 416 | 29.107 | -97.646 | 50.731 | 1.00 | 0.00 |
| C    |       |     |     |     |        |         |        |      |      |
| ATOM | 12807 | OE1 | GLU | 416 | 29.229 | -98.838 | 51.025 | 1.00 | 0.00 |
| O    |       |     |     |     |        |         |        |      |      |
| ATOM | 12808 | OE2 | GLU | 416 | 30.034 | -96.846 | 51.025 | 1.00 | 0.00 |
| O1-  |       |     |     |     |        |         |        |      |      |
| ATOM | 12809 | C   | GLU | 416 | 28.634 | -93.418 | 48.726 | 1.00 | 0.00 |
| C    |       |     |     |     |        |         |        |      |      |
| ATOM | 12810 | O   | GLU | 416 | 29.072 | -93.506 | 47.559 | 1.00 | 0.00 |
| O    |       |     |     |     |        |         |        |      |      |
| ATOM | 12811 | N   | ASN | 417 | 28.283 | -92.250 | 49.267 | 1.00 | 0.00 |
| N    |       |     |     |     |        |         |        |      |      |
| ATOM | 12812 | CA  | ASN | 417 | 28.185 | -90.979 | 48.470 | 1.00 | 0.00 |
| C    |       |     |     |     |        |         |        |      |      |
| ATOM | 12813 | CB  | ASN | 417 | 27.104 | -90.122 | 49.145 | 1.00 | 0.00 |
| C    |       |     |     |     |        |         |        |      |      |
| ATOM | 12814 | CG  | ASN | 417 | 26.507 | -89.075 | 48.208 | 1.00 | 0.00 |
| C    |       |     |     |     |        |         |        |      |      |
| ATOM | 12815 | OD1 | ASN | 417 | 26.745 | -89.030 | 46.976 | 1.00 | 0.00 |
| O    |       |     |     |     |        |         |        |      |      |

|      |       |     |     |     |        |         |        |      |      |
|------|-------|-----|-----|-----|--------|---------|--------|------|------|
| ATOM | 12816 | ND2 | ASN | 417 | 25.768 | -88.135 | 48.735 | 1.00 | 0.00 |
| N    |       |     |     |     |        |         |        |      |      |
| ATOM | 12817 | C   | ASN | 417 | 29.520 | -90.345 | 48.233 | 1.00 | 0.00 |
| C    |       |     |     |     |        |         |        |      |      |
| ATOM | 12818 | O   | ASN | 417 | 30.488 | -90.704 | 48.947 | 1.00 | 0.00 |
| O    |       |     |     |     |        |         |        |      |      |
| ATOM | 12819 | N   | LEU | 418 | 29.587 | -89.414 | 47.248 | 1.00 | 0.00 |
| N    |       |     |     |     |        |         |        |      |      |
| ATOM | 12820 | CA  | LEU | 418 | 30.640 | -88.519 | 46.967 | 1.00 | 0.00 |
| C    |       |     |     |     |        |         |        |      |      |
| ATOM | 12821 | CB  | LEU | 418 | 30.649 | -87.516 | 48.119 | 1.00 | 0.00 |
| C    |       |     |     |     |        |         |        |      |      |
| ATOM | 12822 | CG  | LEU | 418 | 29.339 | -86.834 | 48.485 | 1.00 | 0.00 |
| C    |       |     |     |     |        |         |        |      |      |
| ATOM | 12823 | CD1 | LEU | 418 | 29.645 | -85.826 | 49.532 | 1.00 | 0.00 |
| C    |       |     |     |     |        |         |        |      |      |
| ATOM | 12824 | CD2 | LEU | 418 | 28.537 | -86.215 | 47.366 | 1.00 | 0.00 |
| C    |       |     |     |     |        |         |        |      |      |
| ATOM | 12825 | C   | LEU | 418 | 32.027 | -89.120 | 46.668 | 1.00 | 0.00 |
| C    |       |     |     |     |        |         |        |      |      |
| ATOM | 12826 | O   | LEU | 418 | 33.014 | -88.418 | 46.791 | 1.00 | 0.00 |
| O    |       |     |     |     |        |         |        |      |      |
| ATOM | 12827 | N   | LYS | 419 | 32.165 | -90.461 | 46.447 | 1.00 | 0.00 |
| N    |       |     |     |     |        |         |        |      |      |
| ATOM | 12828 | CA  | LYS | 419 | 33.416 | -91.160 | 46.107 | 1.00 | 0.00 |
| C    |       |     |     |     |        |         |        |      |      |
| ATOM | 12829 | CB  | LYS | 419 | 33.308 | -92.677 | 46.379 | 1.00 | 0.00 |
| C    |       |     |     |     |        |         |        |      |      |
| ATOM | 12830 | CG  | LYS | 419 | 32.809 | -93.043 | 47.793 | 1.00 | 0.00 |
| C    |       |     |     |     |        |         |        |      |      |
| ATOM | 12831 | CD  | LYS | 419 | 32.930 | -94.581 | 48.045 | 1.00 | 0.00 |
| C    |       |     |     |     |        |         |        |      |      |
| ATOM | 12832 | CE  | LYS | 419 | 32.134 | -95.006 | 49.304 | 1.00 | 0.00 |
| C    |       |     |     |     |        |         |        |      |      |
| ATOM | 12833 | NZ  | LYS | 419 | 32.249 | -96.444 | 49.627 | 1.00 | 0.00 |
| N1+  |       |     |     |     |        |         |        |      |      |
| ATOM | 12834 | C   | LYS | 419 | 33.958 | -90.825 | 44.682 | 1.00 | 0.00 |
| C    |       |     |     |     |        |         |        |      |      |
| ATOM | 12835 | O   | LYS | 419 | 35.141 | -91.015 | 44.440 | 1.00 | 0.00 |
| O    |       |     |     |     |        |         |        |      |      |
| ATOM | 12836 | N   | ASP | 420 | 33.158 | -90.256 | 43.811 | 1.00 | 0.00 |
| N    |       |     |     |     |        |         |        |      |      |
| ATOM | 12837 | CA  | ASP | 420 | 33.604 | -89.430 | 42.673 | 1.00 | 0.00 |
| C    |       |     |     |     |        |         |        |      |      |
| ATOM | 12838 | CB  | ASP | 420 | 32.466 | -89.266 | 41.622 | 1.00 | 0.00 |
| C    |       |     |     |     |        |         |        |      |      |
| ATOM | 12839 | CG  | ASP | 420 | 32.825 | -88.669 | 40.325 | 1.00 | 0.00 |
| C    |       |     |     |     |        |         |        |      |      |
| ATOM | 12840 | OD1 | ASP | 420 | 31.857 | -88.568 | 39.523 | 1.00 | 0.00 |
| O    |       |     |     |     |        |         |        |      |      |
| ATOM | 12841 | OD2 | ASP | 420 | 34.046 | -88.434 | 40.054 | 1.00 | 0.00 |
| O1-  |       |     |     |     |        |         |        |      |      |
| ATOM | 12842 | C   | ASP | 420 | 34.303 | -88.091 | 42.986 | 1.00 | 0.00 |
| C    |       |     |     |     |        |         |        |      |      |

|      |       |     |     |     |        |         |        |      |      |
|------|-------|-----|-----|-----|--------|---------|--------|------|------|
| ATOM | 12843 | O   | ASP | 420 | 33.874 | -86.972 | 42.652 | 1.00 | 0.00 |
| O    |       |     |     |     |        |         |        |      |      |
| ATOM | 12844 | N   | ASP | 421 | 35.368 | -88.189 | 43.799 | 1.00 | 0.00 |
| N    |       |     |     |     |        |         |        |      |      |
| ATOM | 12845 | CA  | ASP | 421 | 35.991 | -86.997 | 44.428 | 1.00 | 0.00 |
| C    |       |     |     |     |        |         |        |      |      |
| ATOM | 12846 | CB  | ASP | 421 | 36.682 | -87.443 | 45.740 | 1.00 | 0.00 |
| C    |       |     |     |     |        |         |        |      |      |
| ATOM | 12847 | CG  | ASP | 421 | 37.039 | -86.249 | 46.650 | 1.00 | 0.00 |
| C    |       |     |     |     |        |         |        |      |      |
| ATOM | 12848 | OD1 | ASP | 421 | 38.201 | -85.999 | 47.016 | 1.00 | 0.00 |
| O    |       |     |     |     |        |         |        |      |      |
| ATOM | 12849 | OD2 | ASP | 421 | 36.135 | -85.516 | 47.061 | 1.00 | 0.00 |
| O1-  |       |     |     |     |        |         |        |      |      |
| ATOM | 12850 | C   | ASP | 421 | 36.993 | -86.449 | 43.459 | 1.00 | 0.00 |
| C    |       |     |     |     |        |         |        |      |      |
| ATOM | 12851 | O   | ASP | 421 | 37.604 | -87.259 | 42.708 | 1.00 | 0.00 |
| O    |       |     |     |     |        |         |        |      |      |
| ATOM | 12852 | N   | SER | 422 | 37.228 | -85.170 | 43.439 | 1.00 | 0.00 |
| N    |       |     |     |     |        |         |        |      |      |
| ATOM | 12853 | CA  | SER | 422 | 36.366 | -84.110 | 44.090 | 1.00 | 0.00 |
| C    |       |     |     |     |        |         |        |      |      |
| ATOM | 12854 | CB  | SER | 422 | 37.154 | -82.822 | 44.137 | 1.00 | 0.00 |
| C    |       |     |     |     |        |         |        |      |      |
| ATOM | 12855 | OG  | SER | 422 | 37.348 | -82.252 | 42.815 | 1.00 | 0.00 |
| O    |       |     |     |     |        |         |        |      |      |
| ATOM | 12856 | C   | SER | 422 | 35.069 | -83.812 | 43.380 | 1.00 | 0.00 |
| C    |       |     |     |     |        |         |        |      |      |
| ATOM | 12857 | O   | SER | 422 | 34.808 | -84.131 | 42.210 | 1.00 | 0.00 |
| O    |       |     |     |     |        |         |        |      |      |
| ATOM | 12858 | N   | LEU | 423 | 34.148 | -83.263 | 44.215 | 1.00 | 0.00 |
| N    |       |     |     |     |        |         |        |      |      |
| ATOM | 12859 | CA  | LEU | 423 | 33.175 | -82.303 | 43.717 | 1.00 | 0.00 |
| C    |       |     |     |     |        |         |        |      |      |
| ATOM | 12860 | CB  | LEU | 423 | 31.926 | -82.325 | 44.663 | 1.00 | 0.00 |
| C    |       |     |     |     |        |         |        |      |      |
| ATOM | 12861 | CG  | LEU | 423 | 31.199 | -83.639 | 44.379 | 1.00 | 0.00 |
| C    |       |     |     |     |        |         |        |      |      |
| ATOM | 12862 | CD1 | LEU | 423 | 31.471 | -84.656 | 45.442 | 1.00 | 0.00 |
| C    |       |     |     |     |        |         |        |      |      |
| ATOM | 12863 | CD2 | LEU | 423 | 29.749 | -83.396 | 44.335 | 1.00 | 0.00 |
| C    |       |     |     |     |        |         |        |      |      |
| ATOM | 12864 | C   | LEU | 423 | 33.738 | -80.883 | 43.442 | 1.00 | 0.00 |
| C    |       |     |     |     |        |         |        |      |      |
| ATOM | 12865 | O   | LEU | 423 | 34.751 | -80.561 | 44.058 | 1.00 | 0.00 |
| O    |       |     |     |     |        |         |        |      |      |
| ATOM | 12866 | N   | PRO | 424 | 33.154 | -80.015 | 42.599 | 1.00 | 0.00 |
| N    |       |     |     |     |        |         |        |      |      |
| ATOM | 12867 | CD  | PRO | 424 | 31.928 | -80.215 | 41.875 | 1.00 | 0.00 |
| C    |       |     |     |     |        |         |        |      |      |
| ATOM | 12868 | CG  | PRO | 424 | 31.951 | -79.308 | 40.615 | 1.00 | 0.00 |
| C    |       |     |     |     |        |         |        |      |      |
| ATOM | 12869 | CB  | PRO | 424 | 32.750 | -78.132 | 41.167 | 1.00 | 0.00 |
| C    |       |     |     |     |        |         |        |      |      |



|      |       |     |     |     |        |         |        |      |      |
|------|-------|-----|-----|-----|--------|---------|--------|------|------|
| ATOM | 12870 | CA  | PRO | 424 | 33.732 | -78.769 | 42.175 | 1.00 | 0.00 |
| C    |       |     |     |     |        |         |        |      |      |
| ATOM | 12871 | C   | PRO | 424 | 34.068 | -77.729 | 43.245 | 1.00 | 0.00 |
| C    |       |     |     |     |        |         |        |      |      |
| ATOM | 12872 | O   | PRO | 424 | 33.311 | -77.501 | 44.223 | 1.00 | 0.00 |
| O    |       |     |     |     |        |         |        |      |      |
| ATOM | 12873 | N   | SER | 425 | 35.162 | -76.948 | 43.064 | 1.00 | 0.00 |
| N    |       |     |     |     |        |         |        |      |      |
| ATOM | 12874 | CA  | SER | 425 | 35.436 | -75.806 | 43.973 | 1.00 | 0.00 |
| C    |       |     |     |     |        |         |        |      |      |
| ATOM | 12875 | CB  | SER | 425 | 36.870 | -75.374 | 43.647 | 1.00 | 0.00 |
| C    |       |     |     |     |        |         |        |      |      |
| ATOM | 12876 | OG  | SER | 425 | 37.230 | -74.413 | 44.637 | 1.00 | 0.00 |
| O    |       |     |     |     |        |         |        |      |      |
| ATOM | 12877 | C   | SER | 425 | 34.477 | -74.636 | 43.845 | 1.00 | 0.00 |
| C    |       |     |     |     |        |         |        |      |      |
| ATOM | 12878 | O   | SER | 425 | 34.102 | -73.965 | 44.809 | 1.00 | 0.00 |
| O    |       |     |     |     |        |         |        |      |      |
| ATOM | 12879 | N   | ASN | 426 | 34.091 | -74.273 | 42.638 | 1.00 | 0.00 |
| N    |       |     |     |     |        |         |        |      |      |
| ATOM | 12880 | CA  | ASN | 426 | 33.060 | -73.230 | 42.317 | 1.00 | 0.00 |
| C    |       |     |     |     |        |         |        |      |      |
| ATOM | 12881 | CB  | ASN | 426 | 33.084 | -73.010 | 40.786 | 1.00 | 0.00 |
| C    |       |     |     |     |        |         |        |      |      |
| ATOM | 12882 | CG  | ASN | 426 | 32.127 | -72.012 | 40.244 | 1.00 | 0.00 |
| C    |       |     |     |     |        |         |        |      |      |
| ATOM | 12883 | OD1 | ASN | 426 | 31.114 | -72.381 | 39.646 | 1.00 | 0.00 |
| O    |       |     |     |     |        |         |        |      |      |
| ATOM | 12884 | ND2 | ASN | 426 | 32.484 | -70.762 | 40.326 | 1.00 | 0.00 |
| N    |       |     |     |     |        |         |        |      |      |
| ATOM | 12885 | C   | ASN | 426 | 31.665 | -73.626 | 42.700 | 1.00 | 0.00 |
| C    |       |     |     |     |        |         |        |      |      |
| ATOM | 12886 | O   | ASN | 426 | 31.265 | -74.763 | 42.403 | 1.00 | 0.00 |
| O    |       |     |     |     |        |         |        |      |      |
| ATOM | 12887 | N   | PRO | 427 | 30.897 | -72.673 | 43.275 | 1.00 | 0.00 |
| N    |       |     |     |     |        |         |        |      |      |
| ATOM | 12888 | CD  | PRO | 427 | 31.329 | -71.449 | 43.882 | 1.00 | 0.00 |
| C    |       |     |     |     |        |         |        |      |      |
| ATOM | 12889 | CG  | PRO | 427 | 30.071 | -70.743 | 44.390 | 1.00 | 0.00 |
| C    |       |     |     |     |        |         |        |      |      |
| ATOM | 12890 | CB  | PRO | 427 | 29.199 | -71.925 | 44.737 | 1.00 | 0.00 |
| C    |       |     |     |     |        |         |        |      |      |
| ATOM | 12891 | CA  | PRO | 427 | 29.525 | -73.027 | 43.717 | 1.00 | 0.00 |
| C    |       |     |     |     |        |         |        |      |      |
| ATOM | 12892 | C   | PRO | 427 | 28.438 | -73.199 | 42.615 | 1.00 | 0.00 |
| C    |       |     |     |     |        |         |        |      |      |
| ATOM | 12893 | O   | PRO | 427 | 27.457 | -73.866 | 42.964 | 1.00 | 0.00 |
| O    |       |     |     |     |        |         |        |      |      |
| ATOM | 12894 | N   | ILE | 428 | 28.601 | -72.717 | 41.410 | 1.00 | 0.00 |
| N    |       |     |     |     |        |         |        |      |      |
| ATOM | 12895 | CA  | ILE | 428 | 27.739 | -72.798 | 40.251 | 1.00 | 0.00 |
| C    |       |     |     |     |        |         |        |      |      |
| ATOM | 12896 | CB  | ILE | 428 | 28.120 | -71.671 | 39.191 | 1.00 | 0.00 |
| C    |       |     |     |     |        |         |        |      |      |

|      |       |     |     |     |        |         |        |      |      |
|------|-------|-----|-----|-----|--------|---------|--------|------|------|
| ATOM | 12897 | CG2 | ILE | 428 | 27.037 | -71.821 | 38.098 | 1.00 | 0.00 |
| C    |       |     |     |     |        |         |        |      |      |
| ATOM | 12898 | CG1 | ILE | 428 | 28.227 | -70.288 | 39.856 | 1.00 | 0.00 |
| C    |       |     |     |     |        |         |        |      |      |
| ATOM | 12899 | CD1 | ILE | 428 | 28.790 | -69.156 | 38.959 | 1.00 | 0.00 |
| C    |       |     |     |     |        |         |        |      |      |
| ATOM | 12900 | C   | ILE | 428 | 27.795 | -74.290 | 39.767 | 1.00 | 0.00 |
| C    |       |     |     |     |        |         |        |      |      |
| ATOM | 12901 | O   | ILE | 428 | 26.844 | -75.069 | 39.720 | 1.00 | 0.00 |
| O    |       |     |     |     |        |         |        |      |      |
| ATOM | 12902 | N   | ASP | 429 | 29.001 | -74.697 | 39.333 | 1.00 | 0.00 |
| N    |       |     |     |     |        |         |        |      |      |
| ATOM | 12903 | CA  | ASP | 429 | 29.390 | -76.059 | 38.997 | 1.00 | 0.00 |
| C    |       |     |     |     |        |         |        |      |      |
| ATOM | 12904 | CB  | ASP | 429 | 30.916 | -76.049 | 38.733 | 1.00 | 0.00 |
| C    |       |     |     |     |        |         |        |      |      |
| ATOM | 12905 | CG  | ASP | 429 | 31.352 | -75.219 | 37.481 | 1.00 | 0.00 |
| C    |       |     |     |     |        |         |        |      |      |
| ATOM | 12906 | OD1 | ASP | 429 | 30.469 | -74.798 | 36.701 | 1.00 | 0.00 |
| O    |       |     |     |     |        |         |        |      |      |
| ATOM | 12907 | OD2 | ASP | 429 | 32.571 | -75.155 | 37.232 | 1.00 | 0.00 |
| O1-  |       |     |     |     |        |         |        |      |      |
| ATOM | 12908 | C   | ASP | 429 | 29.004 | -77.068 | 40.046 | 1.00 | 0.00 |
| C    |       |     |     |     |        |         |        |      |      |
| ATOM | 12909 | O   | ASP | 429 | 28.490 | -78.105 | 39.748 | 1.00 | 0.00 |
| O    |       |     |     |     |        |         |        |      |      |
| ATOM | 12910 | N   | PHE | 430 | 29.389 | -76.758 | 41.294 | 1.00 | 0.00 |
| N    |       |     |     |     |        |         |        |      |      |
| ATOM | 12911 | CA  | PHE | 430 | 28.943 | -77.551 | 42.432 | 1.00 | 0.00 |
| C    |       |     |     |     |        |         |        |      |      |
| ATOM | 12912 | CB  | PHE | 430 | 29.438 | -77.020 | 43.796 | 1.00 | 0.00 |
| C    |       |     |     |     |        |         |        |      |      |
| ATOM | 12913 | CG  | PHE | 430 | 29.174 | -77.921 | 44.971 | 1.00 | 0.00 |
| C    |       |     |     |     |        |         |        |      |      |
| ATOM | 12914 | CD1 | PHE | 430 | 29.864 | -79.123 | 45.141 | 1.00 | 0.00 |
| C    |       |     |     |     |        |         |        |      |      |
| ATOM | 12915 | CE1 | PHE | 430 | 29.516 | -80.046 | 46.153 | 1.00 | 0.00 |
| C    |       |     |     |     |        |         |        |      |      |
| ATOM | 12916 | CZ  | PHE | 430 | 28.445 | -79.660 | 47.039 | 1.00 | 0.00 |
| C    |       |     |     |     |        |         |        |      |      |
| ATOM | 12917 | CE2 | PHE | 430 | 27.757 | -78.432 | 46.910 | 1.00 | 0.00 |
| C    |       |     |     |     |        |         |        |      |      |
| ATOM | 12918 | CD2 | PHE | 430 | 28.043 | -77.637 | 45.778 | 1.00 | 0.00 |
| C    |       |     |     |     |        |         |        |      |      |
| ATOM | 12919 | C   | PHE | 430 | 27.431 | -77.683 | 42.508 | 1.00 | 0.00 |
| C    |       |     |     |     |        |         |        |      |      |
| ATOM | 12920 | O   | PHE | 430 | 26.947 | -78.849 | 42.590 | 1.00 | 0.00 |
| O    |       |     |     |     |        |         |        |      |      |
| ATOM | 12921 | N   | SER | 431 | 26.659 | -76.583 | 42.525 | 1.00 | 0.00 |
| N    |       |     |     |     |        |         |        |      |      |
| ATOM | 12922 | CA  | SER | 431 | 25.215 | -76.582 | 42.535 | 1.00 | 0.00 |
| C    |       |     |     |     |        |         |        |      |      |
| ATOM | 12923 | CB  | SER | 431 | 24.659 | -75.133 | 42.532 | 1.00 | 0.00 |
| C    |       |     |     |     |        |         |        |      |      |

|      |       |     |     |     |        |         |        |      |      |
|------|-------|-----|-----|-----|--------|---------|--------|------|------|
| ATOM | 12924 | OG  | SER | 431 | 23.300 | -75.125 | 41.922 | 1.00 | 0.00 |
| O    |       |     |     |     |        |         |        |      |      |
| ATOM | 12925 | C   | SER | 431 | 24.612 | -77.425 | 41.378 | 1.00 | 0.00 |
| C    |       |     |     |     |        |         |        |      |      |
| ATOM | 12926 | O   | SER | 431 | 23.778 | -78.334 | 41.661 | 1.00 | 0.00 |
| O    |       |     |     |     |        |         |        |      |      |
| ATOM | 12927 | N   | TYR | 432 | 24.968 | -77.138 | 40.126 | 1.00 | 0.00 |
| N    |       |     |     |     |        |         |        |      |      |
| ATOM | 12928 | CA  | TYR | 432 | 24.540 | -77.966 | 39.000 | 1.00 | 0.00 |
| C    |       |     |     |     |        |         |        |      |      |
| ATOM | 12929 | CB  | TYR | 432 | 24.981 | -77.323 | 37.716 | 1.00 | 0.00 |
| C    |       |     |     |     |        |         |        |      |      |
| ATOM | 12930 | CG  | TYR | 432 | 24.277 | -75.978 | 37.298 | 1.00 | 0.00 |
| C    |       |     |     |     |        |         |        |      |      |
| ATOM | 12931 | CD1 | TYR | 432 | 22.883 | -75.711 | 37.376 | 1.00 | 0.00 |
| C    |       |     |     |     |        |         |        |      |      |
| ATOM | 12932 | CE1 | TYR | 432 | 22.413 | -74.479 | 36.912 | 1.00 | 0.00 |
| C    |       |     |     |     |        |         |        |      |      |
| ATOM | 12933 | CZ  | TYR | 432 | 23.217 | -73.594 | 36.109 | 1.00 | 0.00 |
| C    |       |     |     |     |        |         |        |      |      |
| ATOM | 12934 | OH  | TYR | 432 | 22.740 | -72.371 | 35.737 | 1.00 | 0.00 |
| O    |       |     |     |     |        |         |        |      |      |
| ATOM | 12935 | CE2 | TYR | 432 | 24.557 | -73.853 | 36.016 | 1.00 | 0.00 |
| C    |       |     |     |     |        |         |        |      |      |
| ATOM | 12936 | CD2 | TYR | 432 | 25.057 | -75.019 | 36.630 | 1.00 | 0.00 |
| C    |       |     |     |     |        |         |        |      |      |
| ATOM | 12937 | C   | TYR | 432 | 24.911 | -79.489 | 39.044 | 1.00 | 0.00 |
| C    |       |     |     |     |        |         |        |      |      |
| ATOM | 12938 | O   | TYR | 432 | 23.982 | -80.265 | 38.752 | 1.00 | 0.00 |
| O    |       |     |     |     |        |         |        |      |      |
| ATOM | 12939 | N   | ARG | 433 | 26.091 | -79.867 | 39.553 | 1.00 | 0.00 |
| N    |       |     |     |     |        |         |        |      |      |
| ATOM | 12940 | CA  | ARG | 433 | 26.416 | -81.250 | 39.794 | 1.00 | 0.00 |
| C    |       |     |     |     |        |         |        |      |      |
| ATOM | 12941 | CB  | ARG | 433 | 27.873 | -81.488 | 40.281 | 1.00 | 0.00 |
| C    |       |     |     |     |        |         |        |      |      |
| ATOM | 12942 | CG  | ARG | 433 | 28.141 | -82.965 | 40.444 | 1.00 | 0.00 |
| C    |       |     |     |     |        |         |        |      |      |
| ATOM | 12943 | CD  | ARG | 433 | 29.544 | -83.346 | 40.013 | 1.00 | 0.00 |
| C    |       |     |     |     |        |         |        |      |      |
| ATOM | 12944 | NE  | ARG | 433 | 29.982 | -84.585 | 40.707 | 1.00 | 0.00 |
| N    |       |     |     |     |        |         |        |      |      |
| ATOM | 12945 | CZ  | ARG | 433 | 31.244 | -85.021 | 40.815 | 1.00 | 0.00 |
| C    |       |     |     |     |        |         |        |      |      |
| ATOM | 12946 | NH1 | ARG | 433 | 31.455 | -86.097 | 41.484 | 1.00 | 0.00 |
| N    |       |     |     |     |        |         |        |      |      |
| ATOM | 12947 | NH2 | ARG | 433 | 32.262 | -84.297 | 40.325 | 1.00 | 0.00 |
| N1+  |       |     |     |     |        |         |        |      |      |
| ATOM | 12948 | C   | ARG | 433 | 25.539 | -81.934 | 40.859 | 1.00 | 0.00 |
| C    |       |     |     |     |        |         |        |      |      |
| ATOM | 12949 | O   | ARG | 433 | 24.965 | -82.967 | 40.561 | 1.00 | 0.00 |
| O    |       |     |     |     |        |         |        |      |      |
| ATOM | 12950 | N   | VAL | 434 | 25.426 | -81.353 | 42.033 | 1.00 | 0.00 |
| N    |       |     |     |     |        |         |        |      |      |

|      |       |     |     |     |        |         |        |      |      |
|------|-------|-----|-----|-----|--------|---------|--------|------|------|
| ATOM | 12951 | CA  | VAL | 434 | 24.511 | -81.697 | 43.101 | 1.00 | 0.00 |
| C    |       |     |     |     |        |         |        |      |      |
| ATOM | 12952 | CB  | VAL | 434 | 24.807 | -80.850 | 44.307 | 1.00 | 0.00 |
| C    |       |     |     |     |        |         |        |      |      |
| ATOM | 12953 | CG1 | VAL | 434 | 23.631 | -81.102 | 45.308 | 1.00 | 0.00 |
| C    |       |     |     |     |        |         |        |      |      |
| ATOM | 12954 | CG2 | VAL | 434 | 26.107 | -81.264 | 45.056 | 1.00 | 0.00 |
| C    |       |     |     |     |        |         |        |      |      |
| ATOM | 12955 | C   | VAL | 434 | 22.999 | -81.745 | 42.655 | 1.00 | 0.00 |
| C    |       |     |     |     |        |         |        |      |      |
| ATOM | 12956 | O   | VAL | 434 | 22.287 | -82.695 | 42.919 | 1.00 | 0.00 |
| O    |       |     |     |     |        |         |        |      |      |
| ATOM | 12957 | N   | ALA | 435 | 22.573 | -80.799 | 41.830 | 1.00 | 0.00 |
| N    |       |     |     |     |        |         |        |      |      |
| ATOM | 12958 | CA  | ALA | 435 | 21.223 | -80.775 | 41.276 | 1.00 | 0.00 |
| C    |       |     |     |     |        |         |        |      |      |
| ATOM | 12959 | CB  | ALA | 435 | 21.021 | -79.435 | 40.455 | 1.00 | 0.00 |
| C    |       |     |     |     |        |         |        |      |      |
| ATOM | 12960 | C   | ALA | 435 | 20.816 | -82.038 | 40.441 | 1.00 | 0.00 |
| C    |       |     |     |     |        |         |        |      |      |
| ATOM | 12961 | O   | ALA | 435 | 19.685 | -82.608 | 40.523 | 1.00 | 0.00 |
| O    |       |     |     |     |        |         |        |      |      |
| ATOM | 12962 | N   | ALA | 436 | 21.766 | -82.573 | 39.658 | 1.00 | 0.00 |
| N    |       |     |     |     |        |         |        |      |      |
| ATOM | 12963 | CA  | ALA | 436 | 21.680 | -83.798 | 38.778 | 1.00 | 0.00 |
| C    |       |     |     |     |        |         |        |      |      |
| ATOM | 12964 | CB  | ALA | 436 | 22.987 | -83.761 | 37.901 | 1.00 | 0.00 |
| C    |       |     |     |     |        |         |        |      |      |
| ATOM | 12965 | C   | ALA | 436 | 21.605 | -85.045 | 39.697 | 1.00 | 0.00 |
| C    |       |     |     |     |        |         |        |      |      |
| ATOM | 12966 | O   | ALA | 436 | 21.332 | -86.168 | 39.175 | 1.00 | 0.00 |
| O    |       |     |     |     |        |         |        |      |      |
| ATOM | 12967 | N   | CYS | 437 | 21.872 | -84.902 | 40.989 | 1.00 | 0.00 |
| N    |       |     |     |     |        |         |        |      |      |
| ATOM | 12968 | CA  | CYS | 437 | 21.721 | -85.991 | 41.964 | 1.00 | 0.00 |
| C    |       |     |     |     |        |         |        |      |      |
| ATOM | 12969 | CB  | CYS | 437 | 23.120 | -86.479 | 42.394 | 1.00 | 0.00 |
| C    |       |     |     |     |        |         |        |      |      |
| ATOM | 12970 | SG  | CYS | 437 | 23.320 | -87.858 | 43.643 | 1.00 | 0.00 |
| S    |       |     |     |     |        |         |        |      |      |
| ATOM | 12971 | C   | CYS | 437 | 20.665 | -85.660 | 43.128 | 1.00 | 0.00 |
| C    |       |     |     |     |        |         |        |      |      |
| ATOM | 12972 | O   | CYS | 437 | 20.680 | -86.279 | 44.176 | 1.00 | 0.00 |
| O    |       |     |     |     |        |         |        |      |      |
| ATOM | 12973 | N   | LEU | 438 | 19.784 | -84.647 | 42.929 | 1.00 | 0.00 |
| N    |       |     |     |     |        |         |        |      |      |
| ATOM | 12974 | CA  | LEU | 438 | 18.801 | -84.190 | 43.937 | 1.00 | 0.00 |
| C    |       |     |     |     |        |         |        |      |      |
| ATOM | 12975 | CB  | LEU | 438 | 18.726 | -82.620 | 43.954 | 1.00 | 0.00 |
| C    |       |     |     |     |        |         |        |      |      |
| ATOM | 12976 | CG  | LEU | 438 | 17.696 | -81.901 | 44.855 | 1.00 | 0.00 |
| C    |       |     |     |     |        |         |        |      |      |
| ATOM | 12977 | CD1 | LEU | 438 | 18.092 | -82.142 | 46.332 | 1.00 | 0.00 |
| C    |       |     |     |     |        |         |        |      |      |

|      |       |     |     |     |        |         |        |      |      |
|------|-------|-----|-----|-----|--------|---------|--------|------|------|
| ATOM | 12978 | CD2 | LEU | 438 | 17.880 | -80.417 | 44.637 | 1.00 | 0.00 |
| C    |       |     |     |     |        |         |        |      |      |
| ATOM | 12979 | C   | LEU | 438 | 17.383 | -84.732 | 43.551 | 1.00 | 0.00 |
| C    |       |     |     |     |        |         |        |      |      |
| ATOM | 12980 | O   | LEU | 438 | 16.940 | -84.557 | 42.442 | 1.00 | 0.00 |
| O    |       |     |     |     |        |         |        |      |      |
| ATOM | 12981 | N   | PRO | 439 | 16.670 | -85.550 | 44.447 | 1.00 | 0.00 |
| N    |       |     |     |     |        |         |        |      |      |
| ATOM | 12982 | CD  | PRO | 439 | 17.323 | -86.069 | 45.645 | 1.00 | 0.00 |
| C    |       |     |     |     |        |         |        |      |      |
| ATOM | 12983 | CG  | PRO | 439 | 16.519 | -87.306 | 45.986 | 1.00 | 0.00 |
| C    |       |     |     |     |        |         |        |      |      |
| ATOM | 12984 | CB  | PRO | 439 | 15.100 | -86.827 | 45.636 | 1.00 | 0.00 |
| C    |       |     |     |     |        |         |        |      |      |
| ATOM | 12985 | CA  | PRO | 439 | 15.276 | -86.055 | 44.312 | 1.00 | 0.00 |
| C    |       |     |     |     |        |         |        |      |      |
| ATOM | 12986 | C   | PRO | 439 | 14.175 | -84.933 | 44.210 | 1.00 | 0.00 |
| C    |       |     |     |     |        |         |        |      |      |
| ATOM | 12987 | O   | PRO | 439 | 13.054 | -85.150 | 44.711 | 1.00 | 0.00 |
| O    |       |     |     |     |        |         |        |      |      |
| ATOM | 12988 | N   | ILE | 440 | 14.423 | -83.804 | 43.472 | 1.00 | 0.00 |
| N    |       |     |     |     |        |         |        |      |      |
| ATOM | 12989 | CA  | ILE | 440 | 13.493 | -82.547 | 43.394 | 1.00 | 0.00 |
| C    |       |     |     |     |        |         |        |      |      |
| ATOM | 12990 | CB  | ILE | 440 | 14.301 | -81.483 | 42.689 | 1.00 | 0.00 |
| C    |       |     |     |     |        |         |        |      |      |
| ATOM | 12991 | CG2 | ILE | 440 | 14.453 | -81.691 | 41.157 | 1.00 | 0.00 |
| C    |       |     |     |     |        |         |        |      |      |
| ATOM | 12992 | CG1 | ILE | 440 | 13.651 | -80.078 | 42.960 | 1.00 | 0.00 |
| C    |       |     |     |     |        |         |        |      |      |
| ATOM | 12993 | CD1 | ILE | 440 | 14.235 | -78.786 | 42.384 | 1.00 | 0.00 |
| C    |       |     |     |     |        |         |        |      |      |
| ATOM | 12994 | C   | ILE | 440 | 12.170 | -82.934 | 42.782 | 1.00 | 0.00 |
| C    |       |     |     |     |        |         |        |      |      |
| ATOM | 12995 | O   | ILE | 440 | 12.154 | -83.838 | 41.971 | 1.00 | 0.00 |
| O    |       |     |     |     |        |         |        |      |      |
| ATOM | 12996 | N   | ASP | 441 | 11.069 | -82.183 | 42.967 | 1.00 | 0.00 |
| N    |       |     |     |     |        |         |        |      |      |
| ATOM | 12997 | CA  | ASP | 441 | 10.022 | -82.039 | 41.890 | 1.00 | 0.00 |
| C    |       |     |     |     |        |         |        |      |      |
| ATOM | 12998 | CB  | ASP | 441 | 8.766  | -81.425 | 42.546 | 1.00 | 0.00 |
| C    |       |     |     |     |        |         |        |      |      |
| ATOM | 12999 | CG  | ASP | 441 | 7.469  | -81.534 | 41.779 | 1.00 | 0.00 |
| C    |       |     |     |     |        |         |        |      |      |
| ATOM | 13000 | OD1 | ASP | 441 | 7.456  | -81.853 | 40.571 | 1.00 | 0.00 |
| O    |       |     |     |     |        |         |        |      |      |
| ATOM | 13001 | OD2 | ASP | 441 | 6.434  | -81.325 | 42.382 | 1.00 | 0.00 |
| O1-  |       |     |     |     |        |         |        |      |      |
| ATOM | 13002 | C   | ASP | 441 | 10.424 | -81.075 | 40.732 | 1.00 | 0.00 |
| C    |       |     |     |     |        |         |        |      |      |
| ATOM | 13003 | O   | ASP | 441 | 10.824 | -79.919 | 40.960 | 1.00 | 0.00 |
| O    |       |     |     |     |        |         |        |      |      |
| ATOM | 13004 | N   | ASP | 442 | 10.169 | -81.510 | 39.456 | 1.00 | 0.00 |
| N    |       |     |     |     |        |         |        |      |      |

|      |       |     |     |     |        |         |        |      |      |
|------|-------|-----|-----|-----|--------|---------|--------|------|------|
| ATOM | 13005 | CA  | ASP | 442 | 10.253 | -80.556 | 38.287 | 1.00 | 0.00 |
| C    |       |     |     |     |        |         |        |      |      |
| ATOM | 13006 | CB  | ASP | 442 | 10.001 | -81.256 | 36.942 | 1.00 | 0.00 |
| C    |       |     |     |     |        |         |        |      |      |
| ATOM | 13007 | CG  | ASP | 442 | 11.204 | -82.086 | 36.464 | 1.00 | 0.00 |
| C    |       |     |     |     |        |         |        |      |      |
| ATOM | 13008 | OD1 | ASP | 442 | 11.108 | -82.737 | 35.420 | 1.00 | 0.00 |
| O    |       |     |     |     |        |         |        |      |      |
| ATOM | 13009 | OD2 | ASP | 442 | 12.213 | -82.191 | 37.233 | 1.00 | 0.00 |
| O1-  |       |     |     |     |        |         |        |      |      |
| ATOM | 13010 | C   | ASP | 442 | 9.437  | -79.261 | 38.424 | 1.00 | 0.00 |
| C    |       |     |     |     |        |         |        |      |      |
| ATOM | 13011 | O   | ASP | 442 | 9.837  | -78.216 | 37.946 | 1.00 | 0.00 |
| O    |       |     |     |     |        |         |        |      |      |
| ATOM | 13012 | N   | VAL | 443 | 8.274  | -79.262 | 39.177 | 1.00 | 0.00 |
| N    |       |     |     |     |        |         |        |      |      |
| ATOM | 13013 | CA  | VAL | 443 | 7.486  | -78.001 | 39.490 | 1.00 | 0.00 |
| C    |       |     |     |     |        |         |        |      |      |
| ATOM | 13014 | CB  | VAL | 443 | 6.107  | -78.526 | 40.035 | 1.00 | 0.00 |
| C    |       |     |     |     |        |         |        |      |      |
| ATOM | 13015 | CG1 | VAL | 443 | 5.265  | -77.307 | 40.312 | 1.00 | 0.00 |
| C    |       |     |     |     |        |         |        |      |      |
| ATOM | 13016 | CG2 | VAL | 443 | 5.350  | -79.298 | 38.965 | 1.00 | 0.00 |
| C    |       |     |     |     |        |         |        |      |      |
| ATOM | 13017 | C   | VAL | 443 | 8.271  | -77.012 | 40.386 | 1.00 | 0.00 |
| C    |       |     |     |     |        |         |        |      |      |
| ATOM | 13018 | O   | VAL | 443 | 7.999  | -75.793 | 40.315 | 1.00 | 0.00 |
| O    |       |     |     |     |        |         |        |      |      |
| ATOM | 13019 | N   | LEU | 444 | 9.223  | -77.553 | 41.124 | 1.00 | 0.00 |
| N    |       |     |     |     |        |         |        |      |      |
| ATOM | 13020 | CA  | LEU | 444 | 10.218 | -76.732 | 41.734 | 1.00 | 0.00 |
| C    |       |     |     |     |        |         |        |      |      |
| ATOM | 13021 | CB  | LEU | 444 | 10.380 | -77.146 | 43.218 | 1.00 | 0.00 |
| C    |       |     |     |     |        |         |        |      |      |
| ATOM | 13022 | CG  | LEU | 444 | 11.311 | -76.261 | 43.975 | 1.00 | 0.00 |
| C    |       |     |     |     |        |         |        |      |      |
| ATOM | 13023 | CD1 | LEU | 444 | 11.007 | -74.787 | 44.063 | 1.00 | 0.00 |
| C    |       |     |     |     |        |         |        |      |      |
| ATOM | 13024 | CD2 | LEU | 444 | 11.346 | -76.763 | 45.375 | 1.00 | 0.00 |
| C    |       |     |     |     |        |         |        |      |      |
| ATOM | 13025 | C   | LEU | 444 | 11.414 | -76.457 | 40.811 | 1.00 | 0.00 |
| C    |       |     |     |     |        |         |        |      |      |
| ATOM | 13026 | O   | LEU | 444 | 11.780 | -75.297 | 40.779 | 1.00 | 0.00 |
| O    |       |     |     |     |        |         |        |      |      |
| ATOM | 13027 | N   | ARG | 445 | 11.941 | -77.469 | 40.038 | 1.00 | 0.00 |
| N    |       |     |     |     |        |         |        |      |      |
| ATOM | 13028 | CA  | ARG | 445 | 13.216 | -77.354 | 39.241 | 1.00 | 0.00 |
| C    |       |     |     |     |        |         |        |      |      |
| ATOM | 13029 | CB  | ARG | 445 | 13.444 | -78.749 | 38.560 | 1.00 | 0.00 |
| C    |       |     |     |     |        |         |        |      |      |
| ATOM | 13030 | CG  | ARG | 445 | 14.913 | -78.868 | 37.962 | 1.00 | 0.00 |
| C    |       |     |     |     |        |         |        |      |      |
| ATOM | 13031 | CD  | ARG | 445 | 15.124 | -80.259 | 37.366 | 1.00 | 0.00 |
| C    |       |     |     |     |        |         |        |      |      |

|      |       |     |     |     |        |         |        |      |      |
|------|-------|-----|-----|-----|--------|---------|--------|------|------|
| ATOM | 13032 | NE  | ARG | 445 | 16.039 | -81.075 | 38.151 | 1.00 | 0.00 |
| N    |       |     |     |     |        |         |        |      |      |
| ATOM | 13033 | CZ  | ARG | 445 | 16.460 | -82.252 | 37.960 | 1.00 | 0.00 |
| C    |       |     |     |     |        |         |        |      |      |
| ATOM | 13034 | NH1 | ARG | 445 | 16.426 | -82.837 | 36.813 | 1.00 | 0.00 |
| N    |       |     |     |     |        |         |        |      |      |
| ATOM | 13035 | NH2 | ARG | 445 | 16.964 | -82.931 | 38.971 | 1.00 | 0.00 |
| N1+  |       |     |     |     |        |         |        |      |      |
| ATOM | 13036 | C   | ARG | 445 | 13.163 | -76.225 | 38.169 | 1.00 | 0.00 |
| C    |       |     |     |     |        |         |        |      |      |
| ATOM | 13037 | O   | ARG | 445 | 14.207 | -75.569 | 37.945 | 1.00 | 0.00 |
| O    |       |     |     |     |        |         |        |      |      |
| ATOM | 13038 | N   | ILE | 446 | 12.008 | -75.984 | 37.584 | 1.00 | 0.00 |
| N    |       |     |     |     |        |         |        |      |      |
| ATOM | 13039 | CA  | ILE | 446 | 11.740 | -74.839 | 36.710 | 1.00 | 0.00 |
| C    |       |     |     |     |        |         |        |      |      |
| ATOM | 13040 | CB  | ILE | 446 | 10.214 | -74.803 | 36.305 | 1.00 | 0.00 |
| C    |       |     |     |     |        |         |        |      |      |
| ATOM | 13041 | CG2 | ILE | 446 | 9.381  | -74.616 | 37.614 | 1.00 | 0.00 |
| C    |       |     |     |     |        |         |        |      |      |
| ATOM | 13042 | CG1 | ILE | 446 | 9.739  | -73.668 | 35.371 | 1.00 | 0.00 |
| C    |       |     |     |     |        |         |        |      |      |
| ATOM | 13043 | CD1 | ILE | 446 | 10.448 | -73.844 | 33.934 | 1.00 | 0.00 |
| C    |       |     |     |     |        |         |        |      |      |
| ATOM | 13044 | C   | ILE | 446 | 12.205 | -73.493 | 37.208 | 1.00 | 0.00 |
| C    |       |     |     |     |        |         |        |      |      |
| ATOM | 13045 | O   | ILE | 446 | 12.785 | -72.706 | 36.509 | 1.00 | 0.00 |
| O    |       |     |     |     |        |         |        |      |      |
| ATOM | 13046 | N   | GLN | 447 | 11.940 | -73.151 | 38.455 | 1.00 | 0.00 |
| N    |       |     |     |     |        |         |        |      |      |
| ATOM | 13047 | CA  | GLN | 447 | 12.180 | -71.857 | 39.089 | 1.00 | 0.00 |
| C    |       |     |     |     |        |         |        |      |      |
| ATOM | 13048 | CB  | GLN | 447 | 11.606 | -71.916 | 40.535 | 1.00 | 0.00 |
| C    |       |     |     |     |        |         |        |      |      |
| ATOM | 13049 | CG  | GLN | 447 | 10.109 | -72.393 | 40.517 | 1.00 | 0.00 |
| C    |       |     |     |     |        |         |        |      |      |
| ATOM | 13050 | CD  | GLN | 447 | 9.517  | -72.621 | 41.903 | 1.00 | 0.00 |
| C    |       |     |     |     |        |         |        |      |      |
| ATOM | 13051 | OE1 | GLN | 447 | 9.782  | -71.881 | 42.861 | 1.00 | 0.00 |
| O    |       |     |     |     |        |         |        |      |      |
| ATOM | 13052 | NE2 | GLN | 447 | 8.668  | -73.613 | 42.112 | 1.00 | 0.00 |
| N    |       |     |     |     |        |         |        |      |      |
| ATOM | 13053 | C   | GLN | 447 | 13.691 | -71.550 | 39.100 | 1.00 | 0.00 |
| C    |       |     |     |     |        |         |        |      |      |
| ATOM | 13054 | O   | GLN | 447 | 14.102 | -70.461 | 38.731 | 1.00 | 0.00 |
| O    |       |     |     |     |        |         |        |      |      |
| ATOM | 13055 | N   | LEU | 448 | 14.484 | -72.570 | 39.544 | 1.00 | 0.00 |
| N    |       |     |     |     |        |         |        |      |      |
| ATOM | 13056 | CA  | LEU | 448 | 15.990 | -72.603 | 39.608 | 1.00 | 0.00 |
| C    |       |     |     |     |        |         |        |      |      |
| ATOM | 13057 | CB  | LEU | 448 | 16.357 | -73.845 | 40.502 | 1.00 | 0.00 |
| C    |       |     |     |     |        |         |        |      |      |
| ATOM | 13058 | CG  | LEU | 448 | 15.613 | -73.969 | 41.873 | 1.00 | 0.00 |
| C    |       |     |     |     |        |         |        |      |      |

|      |       |     |     |     |        |         |        |      |      |
|------|-------|-----|-----|-----|--------|---------|--------|------|------|
| ATOM | 13059 | CD1 | LEU | 448 | 16.052 | -75.197 | 42.720 | 1.00 | 0.00 |
| C    |       |     |     |     |        |         |        |      |      |
| ATOM | 13060 | CD2 | LEU | 448 | 15.756 | -72.697 | 42.756 | 1.00 | 0.00 |
| C    |       |     |     |     |        |         |        |      |      |
| ATOM | 13061 | C   | LEU | 448 | 16.735 | -72.494 | 38.255 | 1.00 | 0.00 |
| C    |       |     |     |     |        |         |        |      |      |
| ATOM | 13062 | O   | LEU | 448 | 17.890 | -71.974 | 38.220 | 1.00 | 0.00 |
| O    |       |     |     |     |        |         |        |      |      |
| ATOM | 13063 | N   | LEU | 449 | 16.053 | -72.830 | 37.147 | 1.00 | 0.00 |
| N    |       |     |     |     |        |         |        |      |      |
| ATOM | 13064 | CA  | LEU | 449 | 16.638 | -72.703 | 35.850 | 1.00 | 0.00 |
| C    |       |     |     |     |        |         |        |      |      |
| ATOM | 13065 | CB  | LEU | 449 | 15.888 | -73.775 | 34.978 | 1.00 | 0.00 |
| C    |       |     |     |     |        |         |        |      |      |
| ATOM | 13066 | CG  | LEU | 449 | 16.284 | -73.911 | 33.501 | 1.00 | 0.00 |
| C    |       |     |     |     |        |         |        |      |      |
| ATOM | 13067 | CD1 | LEU | 449 | 15.960 | -75.290 | 32.875 | 1.00 | 0.00 |
| C    |       |     |     |     |        |         |        |      |      |
| ATOM | 13068 | CD2 | LEU | 449 | 15.596 | -72.887 | 32.593 | 1.00 | 0.00 |
| C    |       |     |     |     |        |         |        |      |      |
| ATOM | 13069 | C   | LEU | 449 | 16.550 | -71.311 | 35.299 | 1.00 | 0.00 |
| C    |       |     |     |     |        |         |        |      |      |
| ATOM | 13070 | O   | LEU | 449 | 17.545 | -70.908 | 34.686 | 1.00 | 0.00 |
| O    |       |     |     |     |        |         |        |      |      |
| ATOM | 13071 | N   | LYS | 450 | 15.457 | -70.617 | 35.608 | 1.00 | 0.00 |
| N    |       |     |     |     |        |         |        |      |      |
| ATOM | 13072 | CA  | LYS | 450 | 15.143 | -69.254 | 35.257 | 1.00 | 0.00 |
| C    |       |     |     |     |        |         |        |      |      |
| ATOM | 13073 | CB  | LYS | 450 | 13.634 | -68.999 | 35.575 | 1.00 | 0.00 |
| C    |       |     |     |     |        |         |        |      |      |
| ATOM | 13074 | CG  | LYS | 450 | 12.645 | -69.761 | 34.691 | 1.00 | 0.00 |
| C    |       |     |     |     |        |         |        |      |      |
| ATOM | 13075 | CD  | LYS | 450 | 11.240 | -69.783 | 35.233 | 1.00 | 0.00 |
| C    |       |     |     |     |        |         |        |      |      |
| ATOM | 13076 | CE  | LYS | 450 | 10.536 | -68.397 | 35.152 | 1.00 | 0.00 |
| C    |       |     |     |     |        |         |        |      |      |
| ATOM | 13077 | NZ  | LYS | 450 | 9.480  | -68.327 | 36.205 | 1.00 | 0.00 |
| N1+  |       |     |     |     |        |         |        |      |      |
| ATOM | 13078 | C   | LYS | 450 | 15.978 | -68.214 | 35.944 | 1.00 | 0.00 |
| C    |       |     |     |     |        |         |        |      |      |
| ATOM | 13079 | O   | LYS | 450 | 16.216 | -67.154 | 35.365 | 1.00 | 0.00 |
| O    |       |     |     |     |        |         |        |      |      |
| ATOM | 13080 | N   | ILE | 451 | 16.351 | -68.516 | 37.196 | 1.00 | 0.00 |
| N    |       |     |     |     |        |         |        |      |      |
| ATOM | 13081 | CA  | ILE | 451 | 17.273 | -67.793 | 38.157 | 1.00 | 0.00 |
| C    |       |     |     |     |        |         |        |      |      |
| ATOM | 13082 | CB  | ILE | 451 | 17.189 | -68.555 | 39.479 | 1.00 | 0.00 |
| C    |       |     |     |     |        |         |        |      |      |
| ATOM | 13083 | CG2 | ILE | 451 | 18.423 | -68.525 | 40.374 | 1.00 | 0.00 |
| C    |       |     |     |     |        |         |        |      |      |
| ATOM | 13084 | CG1 | ILE | 451 | 16.025 | -68.091 | 40.312 | 1.00 | 0.00 |
| C    |       |     |     |     |        |         |        |      |      |
| ATOM | 13085 | CD1 | ILE | 451 | 15.525 | -68.999 | 41.416 | 1.00 | 0.00 |
| C    |       |     |     |     |        |         |        |      |      |



|      |       |     |     |     |        |         |        |      |      |
|------|-------|-----|-----|-----|--------|---------|--------|------|------|
| ATOM | 13086 | C   | ILE | 451 | 18.711 | -67.787 | 37.607 | 1.00 | 0.00 |
| C    |       |     |     |     |        |         |        |      |      |
| ATOM | 13087 | O   | ILE | 451 | 19.142 | -68.694 | 36.939 | 1.00 | 0.00 |
| O    |       |     |     |     |        |         |        |      |      |
| ATOM | 13088 | N   | GLY | 452 | 19.449 | -66.683 | 37.739 | 1.00 | 0.00 |
| N    |       |     |     |     |        |         |        |      |      |
| ATOM | 13089 | CA  | GLY | 452 | 20.837 | -66.581 | 37.343 | 1.00 | 0.00 |
| C    |       |     |     |     |        |         |        |      |      |
| ATOM | 13090 | C   | GLY | 452 | 21.836 | -66.603 | 38.487 | 1.00 | 0.00 |
| C    |       |     |     |     |        |         |        |      |      |
| ATOM | 13091 | O   | GLY | 452 | 23.017 | -66.732 | 38.243 | 1.00 | 0.00 |
| O    |       |     |     |     |        |         |        |      |      |
| ATOM | 13092 | N   | SER | 453 | 21.368 | -66.493 | 39.694 | 1.00 | 0.00 |
| N    |       |     |     |     |        |         |        |      |      |
| ATOM | 13093 | CA  | SER | 453 | 22.217 | -66.421 | 40.908 | 1.00 | 0.00 |
| C    |       |     |     |     |        |         |        |      |      |
| ATOM | 13094 | CB  | SER | 453 | 21.800 | -65.338 | 41.869 | 1.00 | 0.00 |
| C    |       |     |     |     |        |         |        |      |      |
| ATOM | 13095 | OG  | SER | 453 | 22.292 | -65.518 | 43.174 | 1.00 | 0.00 |
| O    |       |     |     |     |        |         |        |      |      |
| ATOM | 13096 | C   | SER | 453 | 22.301 | -67.767 | 41.573 | 1.00 | 0.00 |
| C    |       |     |     |     |        |         |        |      |      |
| ATOM | 13097 | O   | SER | 453 | 21.206 | -68.294 | 41.958 | 1.00 | 0.00 |
| O    |       |     |     |     |        |         |        |      |      |
| ATOM | 13098 | N   | ALA | 454 | 23.469 | -68.382 | 41.595 | 1.00 | 0.00 |
| N    |       |     |     |     |        |         |        |      |      |
| ATOM | 13099 | CA  | ALA | 454 | 23.732 | -69.640 | 42.371 | 1.00 | 0.00 |
| C    |       |     |     |     |        |         |        |      |      |
| ATOM | 13100 | CB  | ALA | 454 | 25.112 | -70.144 | 42.038 | 1.00 | 0.00 |
| C    |       |     |     |     |        |         |        |      |      |
| ATOM | 13101 | C   | ALA | 454 | 23.499 | -69.479 | 43.883 | 1.00 | 0.00 |
| C    |       |     |     |     |        |         |        |      |      |
| ATOM | 13102 | O   | ALA | 454 | 23.214 | -70.495 | 44.482 | 1.00 | 0.00 |
| O    |       |     |     |     |        |         |        |      |      |
| ATOM | 13103 | N   | ILE | 455 | 23.485 | -68.295 | 44.490 | 1.00 | 0.00 |
| N    |       |     |     |     |        |         |        |      |      |
| ATOM | 13104 | CA  | ILE | 455 | 23.191 | -68.214 | 45.914 | 1.00 | 0.00 |
| C    |       |     |     |     |        |         |        |      |      |
| ATOM | 13105 | CB  | ILE | 455 | 23.420 | -66.758 | 46.510 | 1.00 | 0.00 |
| C    |       |     |     |     |        |         |        |      |      |
| ATOM | 13106 | CG2 | ILE | 455 | 23.152 | -66.626 | 48.012 | 1.00 | 0.00 |
| C    |       |     |     |     |        |         |        |      |      |
| ATOM | 13107 | CG1 | ILE | 455 | 24.854 | -66.262 | 46.236 | 1.00 | 0.00 |
| C    |       |     |     |     |        |         |        |      |      |
| ATOM | 13108 | CD1 | ILE | 455 | 25.985 | -67.245 | 46.531 | 1.00 | 0.00 |
| C    |       |     |     |     |        |         |        |      |      |
| ATOM | 13109 | C   | ILE | 455 | 21.705 | -68.667 | 46.154 | 1.00 | 0.00 |
| C    |       |     |     |     |        |         |        |      |      |
| ATOM | 13110 | O   | ILE | 455 | 21.428 | -69.387 | 47.147 | 1.00 | 0.00 |
| O    |       |     |     |     |        |         |        |      |      |
| ATOM | 13111 | N   | GLN | 456 | 20.799 | -68.209 | 45.251 | 1.00 | 0.00 |
| N    |       |     |     |     |        |         |        |      |      |
| ATOM | 13112 | CA  | GLN | 456 | 19.384 | -68.465 | 45.356 | 1.00 | 0.00 |
| C    |       |     |     |     |        |         |        |      |      |

|      |       |     |     |     |        |         |        |      |      |
|------|-------|-----|-----|-----|--------|---------|--------|------|------|
| ATOM | 13113 | CB  | GLN | 456 | 18.604 | -67.741 | 44.276 | 1.00 | 0.00 |
| C    |       |     |     |     |        |         |        |      |      |
| ATOM | 13114 | CG  | GLN | 456 | 18.455 | -66.233 | 44.653 | 1.00 | 0.00 |
| C    |       |     |     |     |        |         |        |      |      |
| ATOM | 13115 | CD  | GLN | 456 | 17.569 | -65.546 | 43.638 | 1.00 | 0.00 |
| C    |       |     |     |     |        |         |        |      |      |
| ATOM | 13116 | OE1 | GLN | 456 | 16.473 | -65.967 | 43.358 | 1.00 | 0.00 |
| O    |       |     |     |     |        |         |        |      |      |
| ATOM | 13117 | NE2 | GLN | 456 | 17.897 | -64.298 | 43.235 | 1.00 | 0.00 |
| N    |       |     |     |     |        |         |        |      |      |
| ATOM | 13118 | C   | GLN | 456 | 19.222 | -69.971 | 45.139 | 1.00 | 0.00 |
| C    |       |     |     |     |        |         |        |      |      |
| ATOM | 13119 | O   | GLN | 456 | 18.412 | -70.579 | 45.766 | 1.00 | 0.00 |
| O    |       |     |     |     |        |         |        |      |      |
| ATOM | 13120 | N   | ARG | 457 | 19.928 | -70.636 | 44.144 | 1.00 | 0.00 |
| N    |       |     |     |     |        |         |        |      |      |
| ATOM | 13121 | CA  | ARG | 457 | 19.880 | -72.143 | 44.002 | 1.00 | 0.00 |
| C    |       |     |     |     |        |         |        |      |      |
| ATOM | 13122 | CB  | ARG | 457 | 20.765 | -72.582 | 42.746 | 1.00 | 0.00 |
| C    |       |     |     |     |        |         |        |      |      |
| ATOM | 13123 | CG  | ARG | 457 | 20.198 | -72.024 | 41.529 | 1.00 | 0.00 |
| C    |       |     |     |     |        |         |        |      |      |
| ATOM | 13124 | CD  | ARG | 457 | 21.021 | -72.481 | 40.398 | 1.00 | 0.00 |
| C    |       |     |     |     |        |         |        |      |      |
| ATOM | 13125 | NE  | ARG | 457 | 20.771 | -71.678 | 39.211 | 1.00 | 0.00 |
| N    |       |     |     |     |        |         |        |      |      |
| ATOM | 13126 | CZ  | ARG | 457 | 21.695 | -71.011 | 38.552 | 1.00 | 0.00 |
| C    |       |     |     |     |        |         |        |      |      |
| ATOM | 13127 | NH1 | ARG | 457 | 22.971 | -71.170 | 38.807 | 1.00 | 0.00 |
| N    |       |     |     |     |        |         |        |      |      |
| ATOM | 13128 | NH2 | ARG | 457 | 21.437 | -70.228 | 37.584 | 1.00 | 0.00 |
| N1+  |       |     |     |     |        |         |        |      |      |
| ATOM | 13129 | C   | ARG | 457 | 20.304 | -72.785 | 45.277 | 1.00 | 0.00 |
| C    |       |     |     |     |        |         |        |      |      |
| ATOM | 13130 | O   | ARG | 457 | 19.456 | -73.428 | 45.906 | 1.00 | 0.00 |
| O    |       |     |     |     |        |         |        |      |      |
| ATOM | 13131 | N   | LEU | 458 | 21.490 | -72.521 | 45.861 | 1.00 | 0.00 |
| N    |       |     |     |     |        |         |        |      |      |
| ATOM | 13132 | CA  | LEU | 458 | 22.043 | -73.289 | 46.997 | 1.00 | 0.00 |
| C    |       |     |     |     |        |         |        |      |      |
| ATOM | 13133 | CB  | LEU | 458 | 23.463 | -72.758 | 47.381 | 1.00 | 0.00 |
| C    |       |     |     |     |        |         |        |      |      |
| ATOM | 13134 | CG  | LEU | 458 | 24.455 | -73.171 | 46.266 | 1.00 | 0.00 |
| C    |       |     |     |     |        |         |        |      |      |
| ATOM | 13135 | CD1 | LEU | 458 | 25.728 | -72.269 | 46.427 | 1.00 | 0.00 |
| C    |       |     |     |     |        |         |        |      |      |
| ATOM | 13136 | CD2 | LEU | 458 | 24.985 | -74.592 | 46.484 | 1.00 | 0.00 |
| C    |       |     |     |     |        |         |        |      |      |
| ATOM | 13137 | C   | LEU | 458 | 21.138 | -73.274 | 48.218 | 1.00 | 0.00 |
| C    |       |     |     |     |        |         |        |      |      |
| ATOM | 13138 | O   | LEU | 458 | 20.986 | -74.257 | 48.909 | 1.00 | 0.00 |
| O    |       |     |     |     |        |         |        |      |      |
| ATOM | 13139 | N   | ARG | 459 | 20.512 | -72.115 | 48.451 | 1.00 | 0.00 |
| N    |       |     |     |     |        |         |        |      |      |

|      |       |     |     |     |        |         |        |      |      |
|------|-------|-----|-----|-----|--------|---------|--------|------|------|
| ATOM | 13140 | CA  | ARG | 459 | 19.422 | -72.005 | 49.488 | 1.00 | 0.00 |
| C    |       |     |     |     |        |         |        |      |      |
| ATOM | 13141 | CB  | ARG | 459 | 18.897 | -70.509 | 49.596 | 1.00 | 0.00 |
| C    |       |     |     |     |        |         |        |      |      |
| ATOM | 13142 | CG  | ARG | 459 | 19.879 | -69.689 | 50.305 | 1.00 | 0.00 |
| C    |       |     |     |     |        |         |        |      |      |
| ATOM | 13143 | CD  | ARG | 459 | 19.604 | -68.189 | 50.286 | 1.00 | 0.00 |
| C    |       |     |     |     |        |         |        |      |      |
| ATOM | 13144 | NE  | ARG | 459 | 18.338 | -67.680 | 50.827 | 1.00 | 0.00 |
| N    |       |     |     |     |        |         |        |      |      |
| ATOM | 13145 | CZ  | ARG | 459 | 18.026 | -67.309 | 52.070 | 1.00 | 0.00 |
| C    |       |     |     |     |        |         |        |      |      |
| ATOM | 13146 | NH1 | ARG | 459 | 16.855 | -66.877 | 52.411 | 1.00 | 0.00 |
| N    |       |     |     |     |        |         |        |      |      |
| ATOM | 13147 | NH2 | ARG | 459 | 18.944 | -67.378 | 52.979 | 1.00 | 0.00 |
| N1+  |       |     |     |     |        |         |        |      |      |
| ATOM | 13148 | C   | ARG | 459 | 18.223 | -72.921 | 49.367 | 1.00 | 0.00 |
| C    |       |     |     |     |        |         |        |      |      |
| ATOM | 13149 | O   | ARG | 459 | 17.880 | -73.504 | 50.337 | 1.00 | 0.00 |
| O    |       |     |     |     |        |         |        |      |      |
| ATOM | 13150 | N   | CYX | 460 | 17.667 | -72.968 | 48.182 | 1.00 | 0.00 |
| N    |       |     |     |     |        |         |        |      |      |
| ATOM | 13151 | CA  | CYX | 460 | 16.501 | -73.774 | 47.905 | 1.00 | 0.00 |
| C    |       |     |     |     |        |         |        |      |      |
| ATOM | 13152 | CB  | CYX | 460 | 15.739 | -73.165 | 46.766 | 1.00 | 0.00 |
| C    |       |     |     |     |        |         |        |      |      |
| ATOM | 13153 | SG  | CYX | 460 | 14.068 | -73.825 | 46.350 | 1.00 | 0.00 |
| S    |       |     |     |     |        |         |        |      |      |
| ATOM | 13154 | C   | CYX | 460 | 16.855 | -75.269 | 47.795 | 1.00 | 0.00 |
| C    |       |     |     |     |        |         |        |      |      |
| ATOM | 13155 | O   | CYX | 460 | 16.103 | -76.126 | 48.285 | 1.00 | 0.00 |
| O    |       |     |     |     |        |         |        |      |      |
| ATOM | 13156 | N   | GLU | 461 | 17.980 | -75.509 | 47.145 | 1.00 | 0.00 |
| N    |       |     |     |     |        |         |        |      |      |
| ATOM | 13157 | CA  | GLU | 461 | 18.572 | -76.907 | 47.021 | 1.00 | 0.00 |
| C    |       |     |     |     |        |         |        |      |      |
| ATOM | 13158 | CB  | GLU | 461 | 19.707 | -76.750 | 45.984 | 1.00 | 0.00 |
| C    |       |     |     |     |        |         |        |      |      |
| ATOM | 13159 | CG  | GLU | 461 | 19.183 | -76.453 | 44.564 | 1.00 | 0.00 |
| C    |       |     |     |     |        |         |        |      |      |
| ATOM | 13160 | CD  | GLU | 461 | 20.247 | -76.470 | 43.472 | 1.00 | 0.00 |
| C    |       |     |     |     |        |         |        |      |      |
| ATOM | 13161 | OE1 | GLU | 461 | 21.380 | -76.027 | 43.623 | 1.00 | 0.00 |
| O    |       |     |     |     |        |         |        |      |      |
| ATOM | 13162 | OE2 | GLU | 461 | 19.983 | -76.768 | 42.271 | 1.00 | 0.00 |
| O1-  |       |     |     |     |        |         |        |      |      |
| ATOM | 13163 | C   | GLU | 461 | 18.950 | -77.498 | 48.393 | 1.00 | 0.00 |
| C    |       |     |     |     |        |         |        |      |      |
| ATOM | 13164 | O   | GLU | 461 | 18.755 | -78.687 | 48.614 | 1.00 | 0.00 |
| O    |       |     |     |     |        |         |        |      |      |
| ATOM | 13165 | N   | LEU | 462 | 19.336 | -76.682 | 49.377 | 1.00 | 0.00 |
| N    |       |     |     |     |        |         |        |      |      |
| ATOM | 13166 | CA  | LEU | 462 | 19.371 | -77.176 | 50.800 | 1.00 | 0.00 |
| C    |       |     |     |     |        |         |        |      |      |

|      |       |     |     |     |        |         |        |      |      |
|------|-------|-----|-----|-----|--------|---------|--------|------|------|
| ATOM | 13167 | CB  | LEU | 462 | 19.996 | -76.115 | 51.670 | 1.00 | 0.00 |
| C    |       |     |     |     |        |         |        |      |      |
| ATOM | 13168 | CG  | LEU | 462 | 20.024 | -76.390 | 53.221 | 1.00 | 0.00 |
| C    |       |     |     |     |        |         |        |      |      |
| ATOM | 13169 | CD1 | LEU | 462 | 20.596 | -77.716 | 53.682 | 1.00 | 0.00 |
| C    |       |     |     |     |        |         |        |      |      |
| ATOM | 13170 | CD2 | LEU | 462 | 20.761 | -75.323 | 54.016 | 1.00 | 0.00 |
| C    |       |     |     |     |        |         |        |      |      |
| ATOM | 13171 | C   | LEU | 462 | 17.978 | -77.440 | 51.356 | 1.00 | 0.00 |
| C    |       |     |     |     |        |         |        |      |      |
| ATOM | 13172 | O   | LEU | 462 | 17.790 | -78.462 | 52.041 | 1.00 | 0.00 |
| O    |       |     |     |     |        |         |        |      |      |
| ATOM | 13173 | N   | ASP | 463 | 17.014 | -76.630 | 51.036 | 1.00 | 0.00 |
| N    |       |     |     |     |        |         |        |      |      |
| ATOM | 13174 | CA  | ASP | 463 | 15.645 | -76.842 | 51.520 | 1.00 | 0.00 |
| C    |       |     |     |     |        |         |        |      |      |
| ATOM | 13175 | CB  | ASP | 463 | 14.681 | -75.655 | 51.250 | 1.00 | 0.00 |
| C    |       |     |     |     |        |         |        |      |      |
| ATOM | 13176 | CG  | ASP | 463 | 13.405 | -75.695 | 52.022 | 1.00 | 0.00 |
| C    |       |     |     |     |        |         |        |      |      |
| ATOM | 13177 | OD1 | ASP | 463 | 12.412 | -75.333 | 51.410 | 1.00 | 0.00 |
| O    |       |     |     |     |        |         |        |      |      |
| ATOM | 13178 | OD2 | ASP | 463 | 13.348 | -76.193 | 53.184 | 1.00 | 0.00 |
| O1-  |       |     |     |     |        |         |        |      |      |
| ATOM | 13179 | C   | ASP | 463 | 15.211 | -78.261 | 51.041 | 1.00 | 0.00 |
| C    |       |     |     |     |        |         |        |      |      |
| ATOM | 13180 | O   | ASP | 463 | 14.711 | -79.086 | 51.793 | 1.00 | 0.00 |
| O    |       |     |     |     |        |         |        |      |      |
| ATOM | 13181 | N   | ILE | 464 | 15.300 | -78.610 | 49.793 | 1.00 | 0.00 |
| N    |       |     |     |     |        |         |        |      |      |
| ATOM | 13182 | CA  | ILE | 464 | 14.912 | -79.856 | 49.130 | 1.00 | 0.00 |
| C    |       |     |     |     |        |         |        |      |      |
| ATOM | 13183 | CB  | ILE | 464 | 15.187 | -79.683 | 47.619 | 1.00 | 0.00 |
| C    |       |     |     |     |        |         |        |      |      |
| ATOM | 13184 | CG2 | ILE | 464 | 14.813 | -80.990 | 46.914 | 1.00 | 0.00 |
| C    |       |     |     |     |        |         |        |      |      |
| ATOM | 13185 | CG1 | ILE | 464 | 14.330 | -78.544 | 47.062 | 1.00 | 0.00 |
| C    |       |     |     |     |        |         |        |      |      |
| ATOM | 13186 | CD1 | ILE | 464 | 14.821 | -77.985 | 45.721 | 1.00 | 0.00 |
| C    |       |     |     |     |        |         |        |      |      |
| ATOM | 13187 | C   | ILE | 464 | 15.737 | -81.037 | 49.821 | 1.00 | 0.00 |
| C    |       |     |     |     |        |         |        |      |      |
| ATOM | 13188 | O   | ILE | 464 | 15.254 | -82.167 | 49.817 | 1.00 | 0.00 |
| O    |       |     |     |     |        |         |        |      |      |
| ATOM | 13189 | N   | MET | 465 | 17.024 | -80.832 | 50.227 | 1.00 | 0.00 |
| N    |       |     |     |     |        |         |        |      |      |
| ATOM | 13190 | CA  | MET | 465 | 17.685 | -81.792 | 51.036 | 1.00 | 0.00 |
| C    |       |     |     |     |        |         |        |      |      |
| ATOM | 13191 | CB  | MET | 465 | 19.175 | -81.524 | 51.175 | 1.00 | 0.00 |
| C    |       |     |     |     |        |         |        |      |      |
| ATOM | 13192 | CG  | MET | 465 | 19.869 | -81.801 | 49.824 | 1.00 | 0.00 |
| C    |       |     |     |     |        |         |        |      |      |
| ATOM | 13193 | SD  | MET | 465 | 21.579 | -82.408 | 49.707 | 1.00 | 0.00 |
| S    |       |     |     |     |        |         |        |      |      |

|      |       |     |     |     |        |         |        |      |      |
|------|-------|-----|-----|-----|--------|---------|--------|------|------|
| ATOM | 13194 | CE  | MET | 465 | 21.955 | -81.746 | 48.125 | 1.00 | 0.00 |
| C    |       |     |     |     |        |         |        |      |      |
| ATOM | 13195 | C   | MET | 465 | 17.085 | -82.035 | 52.421 | 1.00 | 0.00 |
| C    |       |     |     |     |        |         |        |      |      |
| ATOM | 13196 | O   | MET | 465 | 17.430 | -83.022 | 53.073 | 1.00 | 0.00 |
| O    |       |     |     |     |        |         |        |      |      |
| ATOM | 13197 | N   | ASN | 466 | 16.208 | -81.104 | 52.860 | 1.00 | 0.00 |
| N    |       |     |     |     |        |         |        |      |      |
| ATOM | 13198 | CA  | ASN | 466 | 15.597 | -81.366 | 54.123 | 1.00 | 0.00 |
| C    |       |     |     |     |        |         |        |      |      |
| ATOM | 13199 | CB  | ASN | 466 | 15.208 | -80.057 | 54.927 | 1.00 | 0.00 |
| C    |       |     |     |     |        |         |        |      |      |
| ATOM | 13200 | CG  | ASN | 466 | 16.367 | -79.371 | 55.611 | 1.00 | 0.00 |
| C    |       |     |     |     |        |         |        |      |      |
| ATOM | 13201 | OD1 | ASN | 466 | 16.567 | -79.485 | 56.783 | 1.00 | 0.00 |
| O    |       |     |     |     |        |         |        |      |      |
| ATOM | 13202 | ND2 | ASN | 466 | 17.152 | -78.590 | 54.874 | 1.00 | 0.00 |
| N    |       |     |     |     |        |         |        |      |      |
| ATOM | 13203 | C   | ASN | 466 | 14.304 | -82.103 | 53.792 | 1.00 | 0.00 |
| C    |       |     |     |     |        |         |        |      |      |
| ATOM | 13204 | O   | ASN | 466 | 13.972 | -83.027 | 54.541 | 1.00 | 0.00 |
| O    |       |     |     |     |        |         |        |      |      |
| ATOM | 13205 | N   | LYS | 467 | 13.549 | -81.764 | 52.736 | 1.00 | 0.00 |
| N    |       |     |     |     |        |         |        |      |      |
| ATOM | 13206 | CA  | LYS | 467 | 12.328 | -82.410 | 52.306 | 1.00 | 0.00 |
| C    |       |     |     |     |        |         |        |      |      |
| ATOM | 13207 | CB  | LYS | 467 | 11.449 | -81.606 | 51.252 | 1.00 | 0.00 |
| C    |       |     |     |     |        |         |        |      |      |
| ATOM | 13208 | CG  | LYS | 467 | 10.961 | -80.257 | 51.752 | 1.00 | 0.00 |
| C    |       |     |     |     |        |         |        |      |      |
| ATOM | 13209 | CD  | LYS | 467 | 9.746  | -79.670 | 51.078 | 1.00 | 0.00 |
| C    |       |     |     |     |        |         |        |      |      |
| ATOM | 13210 | CE  | LYS | 467 | 9.333  | -78.325 | 51.714 | 1.00 | 0.00 |
| C    |       |     |     |     |        |         |        |      |      |
| ATOM | 13211 | NZ  | LYS | 467 | 10.430 | -77.302 | 51.772 | 1.00 | 0.00 |
| N1+  |       |     |     |     |        |         |        |      |      |
| ATOM | 13212 | C   | LYS | 467 | 12.556 | -83.871 | 51.770 | 1.00 | 0.00 |
| C    |       |     |     |     |        |         |        |      |      |
| ATOM | 13213 | O   | LYS | 467 | 11.724 | -84.778 | 51.919 | 1.00 | 0.00 |
| O    |       |     |     |     |        |         |        |      |      |
| ATOM | 13214 | N   | CYS | 468 | 13.846 | -84.216 | 51.462 | 1.00 | 0.00 |
| N    |       |     |     |     |        |         |        |      |      |
| ATOM | 13215 | CA  | CYS | 468 | 14.266 | -85.571 | 51.110 | 1.00 | 0.00 |
| C    |       |     |     |     |        |         |        |      |      |
| ATOM | 13216 | CB  | CYS | 468 | 15.694 | -85.558 | 50.616 | 1.00 | 0.00 |
| C    |       |     |     |     |        |         |        |      |      |
| ATOM | 13217 | SG  | CYS | 468 | 15.835 | -85.087 | 48.901 | 1.00 | 0.00 |
| S    |       |     |     |     |        |         |        |      |      |
| ATOM | 13218 | C   | CYS | 468 | 14.149 | -86.507 | 52.365 | 1.00 | 0.00 |
| C    |       |     |     |     |        |         |        |      |      |
| ATOM | 13219 | O   | CYS | 468 | 13.928 | -87.670 | 52.185 | 1.00 | 0.00 |
| O    |       |     |     |     |        |         |        |      |      |
| ATOM | 13220 | N   | THR | 469 | 14.124 | -85.984 | 53.622 | 1.00 | 0.00 |
| N    |       |     |     |     |        |         |        |      |      |

|      |       |     |     |     |        |         |        |      |      |
|------|-------|-----|-----|-----|--------|---------|--------|------|------|
| ATOM | 13221 | CA  | THR | 469 | 13.775 | -86.797 | 54.804 | 1.00 | 0.00 |
| C    |       |     |     |     |        |         |        |      |      |
| ATOM | 13222 | CB  | THR | 469 | 13.881 | -85.880 | 56.041 | 1.00 | 0.00 |
| C    |       |     |     |     |        |         |        |      |      |
| ATOM | 13223 | CG2 | THR | 469 | 13.664 | -86.539 | 57.436 | 1.00 | 0.00 |
| C    |       |     |     |     |        |         |        |      |      |
| ATOM | 13224 | OG1 | THR | 469 | 15.167 | -85.400 | 56.006 | 1.00 | 0.00 |
| O    |       |     |     |     |        |         |        |      |      |
| ATOM | 13225 | C   | THR | 469 | 12.279 | -87.334 | 54.753 | 1.00 | 0.00 |
| C    |       |     |     |     |        |         |        |      |      |
| ATOM | 13226 | O   | THR | 469 | 11.942 | -88.266 | 55.480 | 1.00 | 0.00 |
| O    |       |     |     |     |        |         |        |      |      |
| ATOM | 13227 | N   | SER | 470 | 11.377 | -86.799 | 53.854 | 1.00 | 0.00 |
| N    |       |     |     |     |        |         |        |      |      |
| ATOM | 13228 | CA  | SER | 470 | 9.985  | -87.216 | 53.696 | 1.00 | 0.00 |
| C    |       |     |     |     |        |         |        |      |      |
| ATOM | 13229 | CB  | SER | 470 | 8.918  | -86.457 | 54.510 | 1.00 | 0.00 |
| C    |       |     |     |     |        |         |        |      |      |
| ATOM | 13230 | OG  | SER | 470 | 9.411  | -86.156 | 55.851 | 1.00 | 0.00 |
| O    |       |     |     |     |        |         |        |      |      |
| ATOM | 13231 | C   | SER | 470 | 9.615  | -87.230 | 52.194 | 1.00 | 0.00 |
| C    |       |     |     |     |        |         |        |      |      |
| ATOM | 13232 | O   | SER | 470 | 8.967  | -86.298 | 51.675 | 1.00 | 0.00 |
| O    |       |     |     |     |        |         |        |      |      |
| ATOM | 13233 | N   | LEU | 471 | 10.086 | -88.221 | 51.421 | 1.00 | 0.00 |
| N    |       |     |     |     |        |         |        |      |      |
| ATOM | 13234 | CA  | LEU | 471 | 9.823  | -88.460 | 50.023 | 1.00 | 0.00 |
| C    |       |     |     |     |        |         |        |      |      |
| ATOM | 13235 | CB  | LEU | 471 | 11.066 | -89.112 | 49.379 | 1.00 | 0.00 |
| C    |       |     |     |     |        |         |        |      |      |
| ATOM | 13236 | CG  | LEU | 471 | 12.150 | -88.067 | 49.224 | 1.00 | 0.00 |
| C    |       |     |     |     |        |         |        |      |      |
| ATOM | 13237 | CD1 | LEU | 471 | 13.574 | -88.688 | 49.109 | 1.00 | 0.00 |
| C    |       |     |     |     |        |         |        |      |      |
| ATOM | 13238 | CD2 | LEU | 471 | 11.871 | -87.222 | 48.024 | 1.00 | 0.00 |
| C    |       |     |     |     |        |         |        |      |      |
| ATOM | 13239 | C   | LEU | 471 | 8.653  | -89.399 | 49.769 | 1.00 | 0.00 |
| C    |       |     |     |     |        |         |        |      |      |
| ATOM | 13240 | O   | LEU | 471 | 8.747  | -90.532 | 50.175 | 1.00 | 0.00 |
| O    |       |     |     |     |        |         |        |      |      |
| ATOM | 13241 | N   | CYS | 472 | 7.591  | -88.905 | 49.127 | 1.00 | 0.00 |
| N    |       |     |     |     |        |         |        |      |      |
| ATOM | 13242 | CA  | CYS | 472 | 6.308  | -89.609 | 49.026 | 1.00 | 0.00 |
| C    |       |     |     |     |        |         |        |      |      |
| ATOM | 13243 | CB  | CYS | 472 | 5.206  | -88.517 | 49.250 | 1.00 | 0.00 |
| C    |       |     |     |     |        |         |        |      |      |
| ATOM | 13244 | SG  | CYS | 472 | 5.190  | -87.921 | 50.950 | 1.00 | 0.00 |
| S    |       |     |     |     |        |         |        |      |      |
| ATOM | 13245 | C   | CYS | 472 | 6.050  | -90.177 | 47.629 | 1.00 | 0.00 |
| C    |       |     |     |     |        |         |        |      |      |
| ATOM | 13246 | O   | CYS | 472 | 6.878  | -90.019 | 46.725 | 1.00 | 0.00 |
| O    |       |     |     |     |        |         |        |      |      |
| ATOM | 13247 | N   | CYM | 473 | 4.844  | -90.754 | 47.496 | 1.00 | 0.00 |
| N    |       |     |     |     |        |         |        |      |      |

|      |       |     |     |     |        |         |        |      |      |
|------|-------|-----|-----|-----|--------|---------|--------|------|------|
| ATOM | 13248 | CA  | CYM | 473 | 4.236  | -90.845 | 46.194 | 1.00 | 0.00 |
| C    |       |     |     |     |        |         |        |      |      |
| ATOM | 13249 | CB  | CYM | 473 | 3.108  | -91.997 | 46.367 | 1.00 | 0.00 |
| C    |       |     |     |     |        |         |        |      |      |
| ATOM | 13250 | SG  | CYM | 473 | 2.056  | -91.987 | 44.955 | 1.00 | 0.00 |
| S    |       |     |     |     |        |         |        |      |      |
| ATOM | 13251 | C   | CYM | 473 | 3.573  | -89.450 | 45.686 | 1.00 | 0.00 |
| C    |       |     |     |     |        |         |        |      |      |
| ATOM | 13252 | O   | CYM | 473 | 2.920  | -88.777 | 46.544 | 1.00 | 0.00 |
| O    |       |     |     |     |        |         |        |      |      |
| ATOM | 13253 | N   | LYS | 474 | 3.717  | -89.101 | 44.406 | 1.00 | 0.00 |
| N    |       |     |     |     |        |         |        |      |      |
| ATOM | 13254 | CA  | LYS | 474 | 3.238  | -87.795 | 43.896 | 1.00 | 0.00 |
| C    |       |     |     |     |        |         |        |      |      |
| ATOM | 13255 | CB  | LYS | 474 | 3.990  | -87.430 | 42.599 | 1.00 | 0.00 |
| C    |       |     |     |     |        |         |        |      |      |
| ATOM | 13256 | CG  | LYS | 474 | 3.753  | -85.970 | 42.129 | 1.00 | 0.00 |
| C    |       |     |     |     |        |         |        |      |      |
| ATOM | 13257 | CD  | LYS | 474 | 4.630  | -85.469 | 40.974 | 1.00 | 0.00 |
| C    |       |     |     |     |        |         |        |      |      |
| ATOM | 13258 | CE  | LYS | 474 | 4.170  | -84.166 | 40.356 | 1.00 | 0.00 |
| C    |       |     |     |     |        |         |        |      |      |
| ATOM | 13259 | NZ  | LYS | 474 | 4.239  | -82.930 | 41.129 | 1.00 | 0.00 |
| N1+  |       |     |     |     |        |         |        |      |      |
| ATOM | 13260 | C   | LYS | 474 | 1.733  | -87.638 | 43.815 | 1.00 | 0.00 |
| C    |       |     |     |     |        |         |        |      |      |
| ATOM | 13261 | O   | LYS | 474 | 1.188  | -86.549 | 44.029 | 1.00 | 0.00 |
| O    |       |     |     |     |        |         |        |      |      |
| ATOM | 13262 | N   | GLN | 475 | 1.096  | -88.797 | 43.516 | 1.00 | 0.00 |
| N    |       |     |     |     |        |         |        |      |      |
| ATOM | 13263 | CA  | GLN | 475 | -0.362 | -88.957 | 43.399 | 1.00 | 0.00 |
| C    |       |     |     |     |        |         |        |      |      |
| ATOM | 13264 | CB  | GLN | 475 | -0.631 | -90.324 | 42.815 | 1.00 | 0.00 |
| C    |       |     |     |     |        |         |        |      |      |
| ATOM | 13265 | CG  | GLN | 475 | -2.022 | -90.657 | 42.391 | 1.00 | 0.00 |
| C    |       |     |     |     |        |         |        |      |      |
| ATOM | 13266 | CD  | GLN | 475 | -2.485 | -90.027 | 41.101 | 1.00 | 0.00 |
| C    |       |     |     |     |        |         |        |      |      |
| ATOM | 13267 | OE1 | GLN | 475 | -2.028 | -89.060 | 40.523 | 1.00 | 0.00 |
| O    |       |     |     |     |        |         |        |      |      |
| ATOM | 13268 | NE2 | GLN | 475 | -3.624 | -90.546 | 40.507 | 1.00 | 0.00 |
| N    |       |     |     |     |        |         |        |      |      |
| ATOM | 13269 | C   | GLN | 475 | -1.037 | -88.879 | 44.823 | 1.00 | 0.00 |
| C    |       |     |     |     |        |         |        |      |      |
| ATOM | 13270 | O   | GLN | 475 | -2.044 | -88.223 | 44.935 | 1.00 | 0.00 |
| O    |       |     |     |     |        |         |        |      |      |
| ATOM | 13271 | N   | CYM | 476 | -0.333 | -89.411 | 45.866 | 1.00 | 0.00 |
| N    |       |     |     |     |        |         |        |      |      |
| ATOM | 13272 | CA  | CYM | 476 | -0.815 | -89.449 | 47.230 | 1.00 | 0.00 |
| C    |       |     |     |     |        |         |        |      |      |
| ATOM | 13273 | CB  | CYM | 476 | -0.443 | -90.781 | 47.935 | 1.00 | 0.00 |
| C    |       |     |     |     |        |         |        |      |      |
| ATOM | 13274 | SG  | CYM | 476 | -0.974 | -92.180 | 46.884 | 1.00 | 0.00 |
| S    |       |     |     |     |        |         |        |      |      |

|      |       |     |     |     |        |         |        |      |      |
|------|-------|-----|-----|-----|--------|---------|--------|------|------|
| ATOM | 13275 | C   | CYM | 476 | -0.516 | -88.169 | 48.084 | 1.00 | 0.00 |
| C    |       |     |     |     |        |         |        |      |      |
| ATOM | 13276 | O   | CYM | 476 | -1.406 | -87.631 | 48.649 | 1.00 | 0.00 |
| O    |       |     |     |     |        |         |        |      |      |
| ATOM | 13277 | N   | GLN | 477 | 0.748  | -87.871 | 48.196 | 1.00 | 0.00 |
| N    |       |     |     |     |        |         |        |      |      |
| ATOM | 13278 | CA  | GLN | 477 | 1.350  | -86.895 | 49.143 | 1.00 | 0.00 |
| C    |       |     |     |     |        |         |        |      |      |
| ATOM | 13279 | CB  | GLN | 477 | 0.889  | -85.456 | 48.973 | 1.00 | 0.00 |
| C    |       |     |     |     |        |         |        |      |      |
| ATOM | 13280 | CG  | GLN | 477 | 1.090  | -84.904 | 47.595 | 1.00 | 0.00 |
| C    |       |     |     |     |        |         |        |      |      |
| ATOM | 13281 | CD  | GLN | 477 | -0.177 | -84.592 | 46.874 | 1.00 | 0.00 |
| C    |       |     |     |     |        |         |        |      |      |
| ATOM | 13282 | OE1 | GLN | 477 | -1.149 | -84.081 | 47.442 | 1.00 | 0.00 |
| O    |       |     |     |     |        |         |        |      |      |
| ATOM | 13283 | NE2 | GLN | 477 | -0.334 | -84.785 | 45.570 | 1.00 | 0.00 |
| N    |       |     |     |     |        |         |        |      |      |
| ATOM | 13284 | C   | GLN | 477 | 1.305  | -87.241 | 50.685 | 1.00 | 0.00 |
| C    |       |     |     |     |        |         |        |      |      |
| ATOM | 13285 | O   | GLN | 477 | 1.948  | -86.554 | 51.457 | 1.00 | 0.00 |
| O    |       |     |     |     |        |         |        |      |      |
| ATOM | 13286 | N   | GLU | 478 | 0.457  | -88.234 | 51.099 | 1.00 | 0.00 |
| N    |       |     |     |     |        |         |        |      |      |
| ATOM | 13287 | CA  | GLU | 478 | 0.015  | -88.327 | 52.540 | 1.00 | 0.00 |
| C    |       |     |     |     |        |         |        |      |      |
| ATOM | 13288 | CB  | GLU | 478 | -1.496 | -88.712 | 52.514 | 1.00 | 0.00 |
| C    |       |     |     |     |        |         |        |      |      |
| ATOM | 13289 | CG  | GLU | 478 | -1.924 | -90.119 | 51.993 | 1.00 | 0.00 |
| C    |       |     |     |     |        |         |        |      |      |
| ATOM | 13290 | CD  | GLU | 478 | -3.434 | -90.240 | 52.080 | 1.00 | 0.00 |
| C    |       |     |     |     |        |         |        |      |      |
| ATOM | 13291 | OE1 | GLU | 478 | -4.149 | -89.928 | 51.084 | 1.00 | 0.00 |
| O    |       |     |     |     |        |         |        |      |      |
| ATOM | 13292 | OE2 | GLU | 478 | -3.867 | -90.710 | 53.146 | 1.00 | 0.00 |
| O1-  |       |     |     |     |        |         |        |      |      |
| ATOM | 13293 | C   | GLU | 478 | 0.850  | -89.170 | 53.446 | 1.00 | 0.00 |
| C    |       |     |     |     |        |         |        |      |      |
| ATOM | 13294 | O   | GLU | 478 | 0.595  | -89.094 | 54.597 | 1.00 | 0.00 |
| O    |       |     |     |     |        |         |        |      |      |
| ATOM | 13295 | N   | THR | 479 | 1.874  | -89.899 | 52.984 | 1.00 | 0.00 |
| N    |       |     |     |     |        |         |        |      |      |
| ATOM | 13296 | CA  | THR | 479 | 2.852  | -90.685 | 53.812 | 1.00 | 0.00 |
| C    |       |     |     |     |        |         |        |      |      |
| ATOM | 13297 | CB  | THR | 479 | 2.388  | -92.069 | 54.202 | 1.00 | 0.00 |
| C    |       |     |     |     |        |         |        |      |      |
| ATOM | 13298 | CG2 | THR | 479 | 2.610  | -93.271 | 53.178 | 1.00 | 0.00 |
| C    |       |     |     |     |        |         |        |      |      |
| ATOM | 13299 | OG1 | THR | 479 | 3.199  | -92.500 | 55.259 | 1.00 | 0.00 |
| O    |       |     |     |     |        |         |        |      |      |
| ATOM | 13300 | C   | THR | 479 | 4.203  | -90.896 | 53.146 | 1.00 | 0.00 |
| C    |       |     |     |     |        |         |        |      |      |
| ATOM | 13301 | O   | THR | 479 | 4.289  | -90.840 | 51.886 | 1.00 | 0.00 |
| O    |       |     |     |     |        |         |        |      |      |



|      |       |     |     |     |        |         |        |      |      |
|------|-------|-----|-----|-----|--------|---------|--------|------|------|
| ATOM | 13302 | N   | GLU | 480 | 5.278  | -91.030 | 53.939 | 1.00 | 0.00 |
| N    |       |     |     |     |        |         |        |      |      |
| ATOM | 13303 | CA  | GLU | 480 | 6.642  | -91.091 | 53.387 | 1.00 | 0.00 |
| C    |       |     |     |     |        |         |        |      |      |
| ATOM | 13304 | CB  | GLU | 480 | 7.663  | -90.512 | 54.390 | 1.00 | 0.00 |
| C    |       |     |     |     |        |         |        |      |      |
| ATOM | 13305 | CG  | GLU | 480 | 7.980  | -91.275 | 55.697 | 1.00 | 0.00 |
| C    |       |     |     |     |        |         |        |      |      |
| ATOM | 13306 | CD  | GLU | 480 | 6.768  | -91.264 | 56.717 | 1.00 | 0.00 |
| C    |       |     |     |     |        |         |        |      |      |
| ATOM | 13307 | OE1 | GLU | 480 | 6.044  | -90.243 | 56.850 | 1.00 | 0.00 |
| O    |       |     |     |     |        |         |        |      |      |
| ATOM | 13308 | OE2 | GLU | 480 | 6.594  | -92.270 | 57.438 | 1.00 | 0.00 |
| O1-  |       |     |     |     |        |         |        |      |      |
| ATOM | 13309 | C   | GLU | 480 | 7.037  | -92.466 | 52.858 | 1.00 | 0.00 |
| C    |       |     |     |     |        |         |        |      |      |
| ATOM | 13310 | O   | GLU | 480 | 7.047  | -93.458 | 53.535 | 1.00 | 0.00 |
| O    |       |     |     |     |        |         |        |      |      |
| ATOM | 13311 | N   | ILE | 481 | 7.358  | -92.520 | 51.539 | 1.00 | 0.00 |
| N    |       |     |     |     |        |         |        |      |      |
| ATOM | 13312 | CA  | ILE | 481 | 7.845  | -93.677 | 50.757 | 1.00 | 0.00 |
| C    |       |     |     |     |        |         |        |      |      |
| ATOM | 13313 | CB  | ILE | 481 | 7.647  | -93.552 | 49.239 | 1.00 | 0.00 |
| C    |       |     |     |     |        |         |        |      |      |
| ATOM | 13314 | CG2 | ILE | 481 | 8.118  | -94.921 | 48.666 | 1.00 | 0.00 |
| C    |       |     |     |     |        |         |        |      |      |
| ATOM | 13315 | CG1 | ILE | 481 | 6.169  | -93.283 | 48.764 | 1.00 | 0.00 |
| C    |       |     |     |     |        |         |        |      |      |
| ATOM | 13316 | CD1 | ILE | 481 | 5.062  | -94.266 | 49.076 | 1.00 | 0.00 |
| C    |       |     |     |     |        |         |        |      |      |
| ATOM | 13317 | C   | ILE | 481 | 9.252  | -94.040 | 51.184 | 1.00 | 0.00 |
| C    |       |     |     |     |        |         |        |      |      |
| ATOM | 13318 | O   | ILE | 481 | 9.560  | -95.166 | 51.541 | 1.00 | 0.00 |
| O    |       |     |     |     |        |         |        |      |      |
| ATOM | 13319 | N   | THR | 482 | 10.194 | -93.070 | 51.257 | 1.00 | 0.00 |
| N    |       |     |     |     |        |         |        |      |      |
| ATOM | 13320 | CA  | THR | 482 | 11.516 | -93.346 | 51.849 | 1.00 | 0.00 |
| C    |       |     |     |     |        |         |        |      |      |
| ATOM | 13321 | CB  | THR | 482 | 12.470 | -93.922 | 50.729 | 1.00 | 0.00 |
| C    |       |     |     |     |        |         |        |      |      |
| ATOM | 13322 | CG2 | THR | 482 | 12.564 | -92.836 | 49.605 | 1.00 | 0.00 |
| C    |       |     |     |     |        |         |        |      |      |
| ATOM | 13323 | OG1 | THR | 482 | 13.720 | -94.238 | 51.198 | 1.00 | 0.00 |
| O    |       |     |     |     |        |         |        |      |      |
| ATOM | 13324 | C   | THR | 482 | 12.047 | -91.991 | 52.460 | 1.00 | 0.00 |
| C    |       |     |     |     |        |         |        |      |      |
| ATOM | 13325 | O   | THR | 482 | 11.334 | -90.950 | 52.458 | 1.00 | 0.00 |
| O    |       |     |     |     |        |         |        |      |      |
| ATOM | 13326 | N   | THR | 483 | 13.253 | -92.115 | 53.022 | 1.00 | 0.00 |
| N    |       |     |     |     |        |         |        |      |      |
| ATOM | 13327 | CA  | THR | 483 | 13.963 | -91.074 | 53.737 | 1.00 | 0.00 |
| C    |       |     |     |     |        |         |        |      |      |
| ATOM | 13328 | CB  | THR | 483 | 13.559 | -91.095 | 55.223 | 1.00 | 0.00 |
| C    |       |     |     |     |        |         |        |      |      |

|      |       |     |     |     |        |         |        |      |      |
|------|-------|-----|-----|-----|--------|---------|--------|------|------|
| ATOM | 13329 | CG2 | THR | 483 | 14.108 | -92.355 | 56.013 | 1.00 | 0.00 |
| C    |       |     |     |     |        |         |        |      |      |
| ATOM | 13330 | OG1 | THR | 483 | 13.908 | -89.854 | 55.861 | 1.00 | 0.00 |
| O    |       |     |     |     |        |         |        |      |      |
| ATOM | 13331 | C   | THR | 483 | 15.449 | -91.133 | 53.603 | 1.00 | 0.00 |
| C    |       |     |     |     |        |         |        |      |      |
| ATOM | 13332 | O   | THR | 483 | 16.023 | -92.129 | 53.307 | 1.00 | 0.00 |
| O    |       |     |     |     |        |         |        |      |      |
| ATOM | 13333 | N   | LYS | 484 | 16.103 | -90.004 | 53.927 | 1.00 | 0.00 |
| N    |       |     |     |     |        |         |        |      |      |
| ATOM | 13334 | CA  | LYS | 484 | 17.531 | -89.785 | 53.629 | 1.00 | 0.00 |
| C    |       |     |     |     |        |         |        |      |      |
| ATOM | 13335 | CB  | LYS | 484 | 17.765 | -88.316 | 54.016 | 1.00 | 0.00 |
| C    |       |     |     |     |        |         |        |      |      |
| ATOM | 13336 | CG  | LYS | 484 | 17.798 | -88.052 | 55.519 | 1.00 | 0.00 |
| C    |       |     |     |     |        |         |        |      |      |
| ATOM | 13337 | CD  | LYS | 484 | 18.181 | -86.605 | 55.809 | 1.00 | 0.00 |
| C    |       |     |     |     |        |         |        |      |      |
| ATOM | 13338 | CE  | LYS | 484 | 17.887 | -86.330 | 57.224 | 1.00 | 0.00 |
| C    |       |     |     |     |        |         |        |      |      |
| ATOM | 13339 | NZ  | LYS | 484 | 18.436 | -85.021 | 57.597 | 1.00 | 0.00 |
| N1+  |       |     |     |     |        |         |        |      |      |
| ATOM | 13340 | C   | LYS | 484 | 18.481 | -90.788 | 54.333 | 1.00 | 0.00 |
| C    |       |     |     |     |        |         |        |      |      |
| ATOM | 13341 | O   | LYS | 484 | 19.491 | -91.108 | 53.734 | 1.00 | 0.00 |
| O    |       |     |     |     |        |         |        |      |      |
| ATOM | 13342 | N   | ASN | 485 | 18.091 | -91.374 | 55.482 | 1.00 | 0.00 |
| N    |       |     |     |     |        |         |        |      |      |
| ATOM | 13343 | CA  | ASN | 485 | 18.652 | -92.492 | 56.187 | 1.00 | 0.00 |
| C    |       |     |     |     |        |         |        |      |      |
| ATOM | 13344 | CB  | ASN | 485 | 17.829 | -92.708 | 57.506 | 1.00 | 0.00 |
| C    |       |     |     |     |        |         |        |      |      |
| ATOM | 13345 | CG  | ASN | 485 | 17.880 | -91.347 | 58.252 | 1.00 | 0.00 |
| C    |       |     |     |     |        |         |        |      |      |
| ATOM | 13346 | OD1 | ASN | 485 | 17.153 | -90.418 | 57.987 | 1.00 | 0.00 |
| O    |       |     |     |     |        |         |        |      |      |
| ATOM | 13347 | ND2 | ASN | 485 | 18.738 | -91.315 | 59.212 | 1.00 | 0.00 |
| N    |       |     |     |     |        |         |        |      |      |
| ATOM | 13348 | C   | ASN | 485 | 18.701 | -93.775 | 55.307 | 1.00 | 0.00 |
| C    |       |     |     |     |        |         |        |      |      |
| ATOM | 13349 | O   | ASN | 485 | 19.547 | -94.636 | 55.502 | 1.00 | 0.00 |
| O    |       |     |     |     |        |         |        |      |      |
| ATOM | 13350 | N   | GLU | 486 | 17.903 | -93.947 | 54.238 | 1.00 | 0.00 |
| N    |       |     |     |     |        |         |        |      |      |
| ATOM | 13351 | CA  | GLU | 486 | 17.840 | -95.126 | 53.368 | 1.00 | 0.00 |
| C    |       |     |     |     |        |         |        |      |      |
| ATOM | 13352 | CB  | GLU | 486 | 16.453 | -95.493 | 53.150 | 1.00 | 0.00 |
| C    |       |     |     |     |        |         |        |      |      |
| ATOM | 13353 | CG  | GLU | 486 | 15.713 | -95.663 | 54.469 | 1.00 | 0.00 |
| C    |       |     |     |     |        |         |        |      |      |
| ATOM | 13354 | CD  | GLU | 486 | 16.390 | -96.669 | 55.452 | 1.00 | 0.00 |
| C    |       |     |     |     |        |         |        |      |      |
| ATOM | 13355 | OE1 | GLU | 486 | 16.886 | -97.735 | 54.914 | 1.00 | 0.00 |
| O    |       |     |     |     |        |         |        |      |      |

|      |       |     |     |     |        |         |        |      |      |
|------|-------|-----|-----|-----|--------|---------|--------|------|------|
| ATOM | 13356 | OE2 | GLU | 486 | 16.320 | -96.413 | 56.688 | 1.00 | 0.00 |
| O1-  |       |     |     |     |        |         |        |      |      |
| ATOM | 13357 | C   | GLU | 486 | 18.528 | -95.041 | 52.017 | 1.00 | 0.00 |
| C    |       |     |     |     |        |         |        |      |      |
| ATOM | 13358 | O   | GLU | 486 | 18.681 | -96.039 | 51.271 | 1.00 | 0.00 |
| O    |       |     |     |     |        |         |        |      |      |
| ATOM | 13359 | N   | ILE | 487 | 18.842 | -93.784 | 51.620 | 1.00 | 0.00 |
| N    |       |     |     |     |        |         |        |      |      |
| ATOM | 13360 | CA  | ILE | 487 | 19.484 | -93.422 | 50.370 | 1.00 | 0.00 |
| C    |       |     |     |     |        |         |        |      |      |
| ATOM | 13361 | CB  | ILE | 487 | 19.386 | -91.929 | 50.126 | 1.00 | 0.00 |
| C    |       |     |     |     |        |         |        |      |      |
| ATOM | 13362 | CG2 | ILE | 487 | 19.923 | -91.644 | 48.710 | 1.00 | 0.00 |
| C    |       |     |     |     |        |         |        |      |      |
| ATOM | 13363 | CG1 | ILE | 487 | 17.824 | -91.540 | 50.337 | 1.00 | 0.00 |
| C    |       |     |     |     |        |         |        |      |      |
| ATOM | 13364 | CD1 | ILE | 487 | 17.468 | -90.119 | 49.842 | 1.00 | 0.00 |
| C    |       |     |     |     |        |         |        |      |      |
| ATOM | 13365 | C   | ILE | 487 | 20.920 | -93.921 | 50.287 | 1.00 | 0.00 |
| C    |       |     |     |     |        |         |        |      |      |
| ATOM | 13366 | O   | ILE | 487 | 21.624 | -93.526 | 51.176 | 1.00 | 0.00 |
| O    |       |     |     |     |        |         |        |      |      |
| ATOM | 13367 | N   | PHE | 488 | 21.315 | -94.550 | 49.186 | 1.00 | 0.00 |
| N    |       |     |     |     |        |         |        |      |      |
| ATOM | 13368 | CA  | PHE | 488 | 22.680 | -95.044 | 48.954 | 1.00 | 0.00 |
| C    |       |     |     |     |        |         |        |      |      |
| ATOM | 13369 | CB  | PHE | 488 | 22.787 | -96.440 | 49.624 | 1.00 | 0.00 |
| C    |       |     |     |     |        |         |        |      |      |
| ATOM | 13370 | CG  | PHE | 488 | 22.455 | -97.658 | 48.751 | 1.00 | 0.00 |
| C    |       |     |     |     |        |         |        |      |      |
| ATOM | 13371 | CD1 | PHE | 488 | 21.129 | -97.975 | 48.317 | 1.00 | 0.00 |
| C    |       |     |     |     |        |         |        |      |      |
| ATOM | 13372 | CE1 | PHE | 488 | 20.886 | -99.088 | 47.486 | 1.00 | 0.00 |
| C    |       |     |     |     |        |         |        |      |      |
| ATOM | 13373 | CZ  | PHE | 488 | 21.868 | -99.890 | 47.024 | 1.00 | 0.00 |
| C    |       |     |     |     |        |         |        |      |      |
| ATOM | 13374 | CE2 | PHE | 488 | 23.216 | -99.612 | 47.476 | 1.00 | 0.00 |
| C    |       |     |     |     |        |         |        |      |      |
| ATOM | 13375 | CD2 | PHE | 488 | 23.529 | -98.462 | 48.325 | 1.00 | 0.00 |
| C    |       |     |     |     |        |         |        |      |      |
| ATOM | 13376 | C   | PHE | 488 | 23.052 | -94.998 | 47.513 | 1.00 | 0.00 |
| C    |       |     |     |     |        |         |        |      |      |
| ATOM | 13377 | O   | PHE | 488 | 22.209 | -95.004 | 46.607 | 1.00 | 0.00 |
| O    |       |     |     |     |        |         |        |      |      |
| ATOM | 13378 | N   | SER | 489 | 24.332 | -94.959 | 47.289 | 1.00 | 0.00 |
| N    |       |     |     |     |        |         |        |      |      |
| ATOM | 13379 | CA  | SER | 489 | 25.116 | -94.943 | 46.058 | 1.00 | 0.00 |
| C    |       |     |     |     |        |         |        |      |      |
| ATOM | 13380 | CB  | SER | 489 | 26.317 | -93.956 | 46.258 | 1.00 | 0.00 |
| C    |       |     |     |     |        |         |        |      |      |
| ATOM | 13381 | OG  | SER | 489 | 26.039 | -92.758 | 46.944 | 1.00 | 0.00 |
| O    |       |     |     |     |        |         |        |      |      |
| ATOM | 13382 | C   | SER | 489 | 25.575 | -96.348 | 45.603 | 1.00 | 0.00 |
| C    |       |     |     |     |        |         |        |      |      |

|      |       |     |     |     |        |          |        |      |      |
|------|-------|-----|-----|-----|--------|----------|--------|------|------|
| ATOM | 13383 | O   | SER | 489 | 26.675 | -96.739  | 45.826 | 1.00 | 0.00 |
| O    |       |     |     |     |        |          |        |      |      |
| ATOM | 13384 | N   | LEU | 490 | 24.751 | -97.062  | 44.802 | 1.00 | 0.00 |
| N    |       |     |     |     |        |          |        |      |      |
| ATOM | 13385 | CA  | LEU | 490 | 25.239 | -98.250  | 44.000 | 1.00 | 0.00 |
| C    |       |     |     |     |        |          |        |      |      |
| ATOM | 13386 | CB  | LEU | 490 | 24.030 | -99.114  | 43.791 | 1.00 | 0.00 |
| C    |       |     |     |     |        |          |        |      |      |
| ATOM | 13387 | CG  | LEU | 490 | 24.439 | -100.528 | 43.318 | 1.00 | 0.00 |
| C    |       |     |     |     |        |          |        |      |      |
| ATOM | 13388 | CD1 | LEU | 490 | 25.525 | -101.210 | 44.145 | 1.00 | 0.00 |
| C    |       |     |     |     |        |          |        |      |      |
| ATOM | 13389 | CD2 | LEU | 490 | 23.129 | -101.343 | 43.500 | 1.00 | 0.00 |
| C    |       |     |     |     |        |          |        |      |      |
| ATOM | 13390 | C   | LEU | 490 | 25.881 | -97.914  | 42.593 | 1.00 | 0.00 |
| C    |       |     |     |     |        |          |        |      |      |
| ATOM | 13391 | O   | LEU | 490 | 26.431 | -98.734  | 41.949 | 1.00 | 0.00 |
| O    |       |     |     |     |        |          |        |      |      |
| ATOM | 13392 | N   | SER | 491 | 25.750 | -96.614  | 42.155 | 1.00 | 0.00 |
| N    |       |     |     |     |        |          |        |      |      |
| ATOM | 13393 | CA  | SER | 491 | 26.383 | -95.971  | 40.952 | 1.00 | 0.00 |
| C    |       |     |     |     |        |          |        |      |      |
| ATOM | 13394 | CB  | SER | 491 | 25.308 | -95.215  | 40.260 | 1.00 | 0.00 |
| C    |       |     |     |     |        |          |        |      |      |
| ATOM | 13395 | OG  | SER | 491 | 25.834 | -94.739  | 39.063 | 1.00 | 0.00 |
| O    |       |     |     |     |        |          |        |      |      |
| ATOM | 13396 | C   | SER | 491 | 27.433 | -94.961  | 41.429 | 1.00 | 0.00 |
| C    |       |     |     |     |        |          |        |      |      |
| ATOM | 13397 | O   | SER | 491 | 27.146 | -94.235  | 42.397 | 1.00 | 0.00 |
| O    |       |     |     |     |        |          |        |      |      |
| ATOM | 13398 | N   | LEU | 492 | 28.616 | -94.903  | 40.824 | 1.00 | 0.00 |
| N    |       |     |     |     |        |          |        |      |      |
| ATOM | 13399 | CA  | LEU | 492 | 29.727 | -94.000  | 41.104 | 1.00 | 0.00 |
| C    |       |     |     |     |        |          |        |      |      |
| ATOM | 13400 | CB  | LEU | 492 | 30.858 | -94.414  | 40.144 | 1.00 | 0.00 |
| C    |       |     |     |     |        |          |        |      |      |
| ATOM | 13401 | CG  | LEU | 492 | 32.119 | -93.502  | 40.118 | 1.00 | 0.00 |
| C    |       |     |     |     |        |          |        |      |      |
| ATOM | 13402 | CD1 | LEU | 492 | 32.963 | -93.579  | 41.414 | 1.00 | 0.00 |
| C    |       |     |     |     |        |          |        |      |      |
| ATOM | 13403 | CD2 | LEU | 492 | 33.033 | -93.790  | 38.941 | 1.00 | 0.00 |
| C    |       |     |     |     |        |          |        |      |      |
| ATOM | 13404 | C   | LEU | 492 | 29.451 | -92.522  | 41.150 | 1.00 | 0.00 |
| C    |       |     |     |     |        |          |        |      |      |
| ATOM | 13405 | O   | LEU | 492 | 30.099 | -91.644  | 41.714 | 1.00 | 0.00 |
| O    |       |     |     |     |        |          |        |      |      |
| ATOM | 13406 | N   | CYS | 493 | 28.296 | -92.126  | 40.589 | 1.00 | 0.00 |
| N    |       |     |     |     |        |          |        |      |      |
| ATOM | 13407 | CA  | CYS | 493 | 27.846 | -90.744  | 40.627 | 1.00 | 0.00 |
| C    |       |     |     |     |        |          |        |      |      |
| ATOM | 13408 | CB  | CYS | 493 | 26.675 | -90.607  | 39.662 | 1.00 | 0.00 |
| C    |       |     |     |     |        |          |        |      |      |
| ATOM | 13409 | SG  | CYS | 493 | 25.269 | -91.769  | 39.801 | 1.00 | 0.00 |
| S    |       |     |     |     |        |          |        |      |      |

|      |       |    |     |     |        |         |        |      |      |
|------|-------|----|-----|-----|--------|---------|--------|------|------|
| ATOM | 13410 | C  | CYS | 493 | 27.280 | -90.317 | 42.002 | 1.00 | 0.00 |
| C    |       |    |     |     |        |         |        |      |      |
| ATOM | 13411 | O  | CYS | 493 | 27.168 | -89.117 | 42.290 | 1.00 | 0.00 |
| O    |       |    |     |     |        |         |        |      |      |
| ATOM | 13412 | N  | GLY | 494 | 26.736 | -91.260 | 42.784 | 1.00 | 0.00 |
| N    |       |    |     |     |        |         |        |      |      |
| ATOM | 13413 | CA | GLY | 494 | 25.897 | -91.053 | 43.895 | 1.00 | 0.00 |
| C    |       |    |     |     |        |         |        |      |      |
| ATOM | 13414 | C  | GLY | 494 | 24.574 | -91.715 | 43.816 | 1.00 | 0.00 |
| C    |       |    |     |     |        |         |        |      |      |
| ATOM | 13415 | O  | GLY | 494 | 24.419 | -92.578 | 42.948 | 1.00 | 0.00 |
| O    |       |    |     |     |        |         |        |      |      |
| ATOM | 13416 | N  | PRO | 495 | 23.657 | -91.257 | 44.724 | 1.00 | 0.00 |
| N    |       |    |     |     |        |         |        |      |      |
| ATOM | 13417 | CD | PRO | 495 | 23.899 | -90.563 | 46.010 | 1.00 | 0.00 |
| C    |       |    |     |     |        |         |        |      |      |
| ATOM | 13418 | CG | PRO | 495 | 22.844 | -91.202 | 46.937 | 1.00 | 0.00 |
| C    |       |    |     |     |        |         |        |      |      |
| ATOM | 13419 | CB | PRO | 495 | 21.667 | -91.570 | 45.998 | 1.00 | 0.00 |
| C    |       |    |     |     |        |         |        |      |      |
| ATOM | 13420 | CA | PRO | 495 | 22.369 | -92.001 | 44.729 | 1.00 | 0.00 |
| C    |       |    |     |     |        |         |        |      |      |
| ATOM | 13421 | C  | PRO | 495 | 21.474 | -91.839 | 43.563 | 1.00 | 0.00 |
| C    |       |    |     |     |        |         |        |      |      |
| ATOM | 13422 | O  | PRO | 495 | 20.494 | -92.555 | 43.454 | 1.00 | 0.00 |
| O    |       |    |     |     |        |         |        |      |      |
| ATOM | 13423 | N  | MET | 496 | 21.740 | -90.796 | 42.749 | 1.00 | 0.00 |
| N    |       |    |     |     |        |         |        |      |      |
| ATOM | 13424 | CA | MET | 496 | 20.791 | -90.465 | 41.676 | 1.00 | 0.00 |
| C    |       |    |     |     |        |         |        |      |      |
| ATOM | 13425 | CB | MET | 496 | 19.841 | -89.466 | 42.356 | 1.00 | 0.00 |
| C    |       |    |     |     |        |         |        |      |      |
| ATOM | 13426 | CG | MET | 496 | 18.498 | -89.483 | 41.606 | 1.00 | 0.00 |
| C    |       |    |     |     |        |         |        |      |      |
| ATOM | 13427 | SD | MET | 496 | 17.575 | -87.951 | 41.888 | 1.00 | 0.00 |
| S    |       |    |     |     |        |         |        |      |      |
| ATOM | 13428 | CE | MET | 496 | 18.153 | -86.807 | 40.558 | 1.00 | 0.00 |
| C    |       |    |     |     |        |         |        |      |      |
| ATOM | 13429 | C  | MET | 496 | 21.326 | -89.954 | 40.343 | 1.00 | 0.00 |
| C    |       |    |     |     |        |         |        |      |      |
| ATOM | 13430 | O  | MET | 496 | 22.198 | -89.119 | 40.344 | 1.00 | 0.00 |
| O    |       |    |     |     |        |         |        |      |      |
| ATOM | 13431 | N  | ALA | 497 | 20.769 | -90.396 | 39.230 | 1.00 | 0.00 |
| N    |       |    |     |     |        |         |        |      |      |
| ATOM | 13432 | CA | ALA | 497 | 21.149 | -90.021 | 37.927 | 1.00 | 0.00 |
| C    |       |    |     |     |        |         |        |      |      |
| ATOM | 13433 | CB | ALA | 497 | 22.330 | -90.881 | 37.480 | 1.00 | 0.00 |
| C    |       |    |     |     |        |         |        |      |      |
| ATOM | 13434 | C  | ALA | 497 | 19.996 | -90.318 | 36.936 | 1.00 | 0.00 |
| C    |       |    |     |     |        |         |        |      |      |
| ATOM | 13435 | O  | ALA | 497 | 18.937 | -90.891 | 37.303 | 1.00 | 0.00 |
| O    |       |    |     |     |        |         |        |      |      |
| ATOM | 13436 | N  | ALA | 498 | 20.049 | -89.876 | 35.707 | 1.00 | 0.00 |
| N    |       |    |     |     |        |         |        |      |      |

|      |       |     |     |     |        |         |        |      |      |
|------|-------|-----|-----|-----|--------|---------|--------|------|------|
| ATOM | 13437 | CA  | ALA | 498 | 19.061 | -90.213 | 34.638 | 1.00 | 0.00 |
| C    |       |     |     |     |        |         |        |      |      |
| ATOM | 13438 | CB  | ALA | 498 | 19.158 | -89.218 | 33.436 | 1.00 | 0.00 |
| C    |       |     |     |     |        |         |        |      |      |
| ATOM | 13439 | C   | ALA | 498 | 19.283 | -91.665 | 34.232 | 1.00 | 0.00 |
| C    |       |     |     |     |        |         |        |      |      |
| ATOM | 13440 | O   | ALA | 498 | 20.449 | -92.158 | 34.140 | 1.00 | 0.00 |
| O    |       |     |     |     |        |         |        |      |      |
| ATOM | 13441 | N   | TYR | 499 | 18.207 | -92.363 | 33.924 | 1.00 | 0.00 |
| N    |       |     |     |     |        |         |        |      |      |
| ATOM | 13442 | CA  | TYR | 499 | 18.201 | -93.782 | 33.406 | 1.00 | 0.00 |
| C    |       |     |     |     |        |         |        |      |      |
| ATOM | 13443 | CB  | TYR | 499 | 18.052 | -94.762 | 34.573 | 1.00 | 0.00 |
| C    |       |     |     |     |        |         |        |      |      |
| ATOM | 13444 | CG  | TYR | 499 | 19.204 | -94.861 | 35.547 | 1.00 | 0.00 |
| C    |       |     |     |     |        |         |        |      |      |
| ATOM | 13445 | CD1 | TYR | 499 | 20.086 | -95.947 | 35.490 | 1.00 | 0.00 |
| C    |       |     |     |     |        |         |        |      |      |
| ATOM | 13446 | CE1 | TYR | 499 | 21.038 | -96.148 | 36.492 | 1.00 | 0.00 |
| C    |       |     |     |     |        |         |        |      |      |
| ATOM | 13447 | CZ  | TYR | 499 | 21.118 | -95.255 | 37.553 | 1.00 | 0.00 |
| C    |       |     |     |     |        |         |        |      |      |
| ATOM | 13448 | OH  | TYR | 499 | 21.998 | -95.525 | 38.562 | 1.00 | 0.00 |
| O    |       |     |     |     |        |         |        |      |      |
| ATOM | 13449 | CE2 | TYR | 499 | 20.303 | -94.129 | 37.591 | 1.00 | 0.00 |
| C    |       |     |     |     |        |         |        |      |      |
| ATOM | 13450 | CD2 | TYR | 499 | 19.354 | -93.932 | 36.583 | 1.00 | 0.00 |
| C    |       |     |     |     |        |         |        |      |      |
| ATOM | 13451 | C   | TYR | 499 | 17.087 | -94.085 | 32.378 | 1.00 | 0.00 |
| C    |       |     |     |     |        |         |        |      |      |
| ATOM | 13452 | O   | TYR | 499 | 16.023 | -93.600 | 32.527 | 1.00 | 0.00 |
| O    |       |     |     |     |        |         |        |      |      |
| ATOM | 13453 | N   | VAL | 500 | 17.343 | -94.967 | 31.409 | 1.00 | 0.00 |
| N    |       |     |     |     |        |         |        |      |      |
| ATOM | 13454 | CA  | VAL | 500 | 16.432 | -95.134 | 30.233 | 1.00 | 0.00 |
| C    |       |     |     |     |        |         |        |      |      |
| ATOM | 13455 | CB  | VAL | 500 | 17.099 | -94.563 | 28.959 | 1.00 | 0.00 |
| C    |       |     |     |     |        |         |        |      |      |
| ATOM | 13456 | CG1 | VAL | 500 | 18.229 | -95.447 | 28.424 | 1.00 | 0.00 |
| C    |       |     |     |     |        |         |        |      |      |
| ATOM | 13457 | CG2 | VAL | 500 | 16.079 | -94.298 | 27.851 | 1.00 | 0.00 |
| C    |       |     |     |     |        |         |        |      |      |
| ATOM | 13458 | C   | VAL | 500 | 15.965 | -96.641 | 30.044 | 1.00 | 0.00 |
| C    |       |     |     |     |        |         |        |      |      |
| ATOM | 13459 | O   | VAL | 500 | 16.683 | -97.503 | 30.522 | 1.00 | 0.00 |
| O    |       |     |     |     |        |         |        |      |      |
| ATOM | 13460 | N   | ASN | 501 | 14.760 | -96.893 | 29.589 | 1.00 | 0.00 |
| N    |       |     |     |     |        |         |        |      |      |
| ATOM | 13461 | CA  | ASN | 501 | 14.272 | -98.208 | 29.407 | 1.00 | 0.00 |
| C    |       |     |     |     |        |         |        |      |      |
| ATOM | 13462 | CB  | ASN | 501 | 12.920 | -98.359 | 30.103 | 1.00 | 0.00 |
| C    |       |     |     |     |        |         |        |      |      |
| ATOM | 13463 | CG  | ASN | 501 | 11.699 | -98.027 | 29.270 | 1.00 | 0.00 |
| C    |       |     |     |     |        |         |        |      |      |

|      |       |     |     |     |        |          |        |      |      |
|------|-------|-----|-----|-----|--------|----------|--------|------|------|
| ATOM | 13464 | OD1 | ASN | 501 | 11.707 | -97.300  | 28.284 | 1.00 | 0.00 |
| O    |       |     |     |     |        |          |        |      |      |
| ATOM | 13465 | ND2 | ASN | 501 | 10.556 | -98.611  | 29.758 | 1.00 | 0.00 |
| N    |       |     |     |     |        |          |        |      |      |
| ATOM | 13466 | C   | ASN | 501 | 14.283 | -98.524  | 27.894 | 1.00 | 0.00 |
| C    |       |     |     |     |        |          |        |      |      |
| ATOM | 13467 | O   | ASN | 501 | 14.493 | -97.623  | 27.133 | 1.00 | 0.00 |
| O    |       |     |     |     |        |          |        |      |      |
| ATOM | 13468 | N   | PRO | 502 | 14.019 | -99.770  | 27.391 | 1.00 | 0.00 |
| N    |       |     |     |     |        |          |        |      |      |
| ATOM | 13469 | CD  | PRO | 502 | 13.677 | -100.929 | 28.201 | 1.00 | 0.00 |
| C    |       |     |     |     |        |          |        |      |      |
| ATOM | 13470 | CG  | PRO | 502 | 14.098 | -102.112 | 27.353 | 1.00 | 0.00 |
| C    |       |     |     |     |        |          |        |      |      |
| ATOM | 13471 | CB  | PRO | 502 | 13.793 | -101.628 | 25.948 | 1.00 | 0.00 |
| C    |       |     |     |     |        |          |        |      |      |
| ATOM | 13472 | CA  | PRO | 502 | 14.145 | -100.142 | 26.000 | 1.00 | 0.00 |
| C    |       |     |     |     |        |          |        |      |      |
| ATOM | 13473 | C   | PRO | 502 | 13.246 | -99.342  | 25.008 | 1.00 | 0.00 |
| C    |       |     |     |     |        |          |        |      |      |
| ATOM | 13474 | O   | PRO | 502 | 13.597 | -99.254  | 23.851 | 1.00 | 0.00 |
| O    |       |     |     |     |        |          |        |      |      |
| ATOM | 13475 | N   | HIE | 503 | 12.155 | -98.822  | 25.493 | 1.00 | 0.00 |
| N    |       |     |     |     |        |          |        |      |      |
| ATOM | 13476 | CA  | HIE | 503 | 11.285 | -97.922  | 24.680 | 1.00 | 0.00 |
| C    |       |     |     |     |        |          |        |      |      |
| ATOM | 13477 | CB  | HIE | 503 | 9.814  | -98.319  | 24.894 | 1.00 | 0.00 |
| C    |       |     |     |     |        |          |        |      |      |
| ATOM | 13478 | CG  | HIE | 503 | 9.593  | -99.734  | 24.481 | 1.00 | 0.00 |
| C    |       |     |     |     |        |          |        |      |      |
| ATOM | 13479 | ND1 | HIE | 503 | 9.300  | -100.057 | 23.177 | 1.00 | 0.00 |
| N    |       |     |     |     |        |          |        |      |      |
| ATOM | 13480 | CE1 | HIE | 503 | 9.322  | -101.371 | 23.139 | 1.00 | 0.00 |
| C    |       |     |     |     |        |          |        |      |      |
| ATOM | 13481 | NE2 | HIE | 503 | 9.602  | -101.907 | 24.363 | 1.00 | 0.00 |
| N    |       |     |     |     |        |          |        |      |      |
| ATOM | 13482 | CD2 | HIE | 503 | 9.747  | -100.874 | 25.241 | 1.00 | 0.00 |
| C    |       |     |     |     |        |          |        |      |      |
| ATOM | 13483 | C   | HIE | 503 | 11.478 | -96.385  | 24.786 | 1.00 | 0.00 |
| C    |       |     |     |     |        |          |        |      |      |
| ATOM | 13484 | O   | HIE | 503 | 10.698 | -95.589  | 24.279 | 1.00 | 0.00 |
| O    |       |     |     |     |        |          |        |      |      |
| ATOM | 13485 | N   | GLY | 504 | 12.535 | -95.979  | 25.423 | 1.00 | 0.00 |
| N    |       |     |     |     |        |          |        |      |      |
| ATOM | 13486 | CA  | GLY | 504 | 13.167 | -94.656  | 25.329 | 1.00 | 0.00 |
| C    |       |     |     |     |        |          |        |      |      |
| ATOM | 13487 | C   | GLY | 504 | 12.592 | -93.674  | 26.369 | 1.00 | 0.00 |
| C    |       |     |     |     |        |          |        |      |      |
| ATOM | 13488 | O   | GLY | 504 | 13.115 | -92.581  | 26.430 | 1.00 | 0.00 |
| O    |       |     |     |     |        |          |        |      |      |
| ATOM | 13489 | N   | TYR | 505 | 11.609 | -94.093  | 27.142 | 1.00 | 0.00 |
| N    |       |     |     |     |        |          |        |      |      |
| ATOM | 13490 | CA  | TYR | 505 | 11.240 | -93.362  | 28.412 | 1.00 | 0.00 |
| C    |       |     |     |     |        |          |        |      |      |

|      |       |     |     |     |        |         |        |      |      |
|------|-------|-----|-----|-----|--------|---------|--------|------|------|
| ATOM | 13491 | CB  | TYR | 505 | 10.058 | -94.055 | 29.112 | 1.00 | 0.00 |
| C    |       |     |     |     |        |         |        |      |      |
| ATOM | 13492 | CG  | TYR | 505 | 8.841  | -94.188 | 28.223 | 1.00 | 0.00 |
| C    |       |     |     |     |        |         |        |      |      |
| ATOM | 13493 | CD1 | TYR | 505 | 8.586  | -95.389 | 27.541 | 1.00 | 0.00 |
| C    |       |     |     |     |        |         |        |      |      |
| ATOM | 13494 | CE1 | TYR | 505 | 7.517  | -95.488 | 26.652 | 1.00 | 0.00 |
| C    |       |     |     |     |        |         |        |      |      |
| ATOM | 13495 | CZ  | TYR | 505 | 6.683  | -94.393 | 26.463 | 1.00 | 0.00 |
| C    |       |     |     |     |        |         |        |      |      |
| ATOM | 13496 | OH  | TYR | 505 | 5.630  | -94.523 | 25.602 | 1.00 | 0.00 |
| O    |       |     |     |     |        |         |        |      |      |
| ATOM | 13497 | CE2 | TYR | 505 | 6.907  | -93.199 | 27.145 | 1.00 | 0.00 |
| C    |       |     |     |     |        |         |        |      |      |
| ATOM | 13498 | CD2 | TYR | 505 | 7.989  | -93.095 | 28.020 | 1.00 | 0.00 |
| C    |       |     |     |     |        |         |        |      |      |
| ATOM | 13499 | C   | TYR | 505 | 12.433 | -93.214 | 29.424 | 1.00 | 0.00 |
| C    |       |     |     |     |        |         |        |      |      |
| ATOM | 13500 | O   | TYR | 505 | 12.962 | -94.233 | 29.814 | 1.00 | 0.00 |
| O    |       |     |     |     |        |         |        |      |      |
| ATOM | 13501 | N   | VAL | 506 | 12.807 | -92.035 | 29.716 | 1.00 | 0.00 |
| N    |       |     |     |     |        |         |        |      |      |
| ATOM | 13502 | CA  | VAL | 506 | 13.819 | -91.635 | 30.720 | 1.00 | 0.00 |
| C    |       |     |     |     |        |         |        |      |      |
| ATOM | 13503 | CB  | VAL | 506 | 14.957 | -90.952 | 29.980 | 1.00 | 0.00 |
| C    |       |     |     |     |        |         |        |      |      |
| ATOM | 13504 | CG1 | VAL | 506 | 14.722 | -89.568 | 29.223 | 1.00 | 0.00 |
| C    |       |     |     |     |        |         |        |      |      |
| ATOM | 13505 | CG2 | VAL | 506 | 16.153 | -90.626 | 30.886 | 1.00 | 0.00 |
| C    |       |     |     |     |        |         |        |      |      |
| ATOM | 13506 | C   | VAL | 506 | 13.288 | -90.766 | 31.825 | 1.00 | 0.00 |
| C    |       |     |     |     |        |         |        |      |      |
| ATOM | 13507 | O   | VAL | 506 | 12.350 | -90.056 | 31.573 | 1.00 | 0.00 |
| O    |       |     |     |     |        |         |        |      |      |
| ATOM | 13508 | N   | HIP | 507 | 13.820 | -90.911 | 33.005 | 1.00 | 0.00 |
| N    |       |     |     |     |        |         |        |      |      |
| ATOM | 13509 | CA  | HIP | 507 | 13.678 | -90.056 | 34.182 | 1.00 | 0.00 |
| C    |       |     |     |     |        |         |        |      |      |
| ATOM | 13510 | CB  | HIP | 507 | 12.494 | -90.640 | 34.900 | 1.00 | 0.00 |
| C    |       |     |     |     |        |         |        |      |      |
| ATOM | 13511 | CG  | HIP | 507 | 11.304 | -91.089 | 34.179 | 1.00 | 0.00 |
| C    |       |     |     |     |        |         |        |      |      |
| ATOM | 13512 | ND1 | HIP | 507 | 10.302 | -90.287 | 33.625 | 1.00 | 0.00 |
| N1+  |       |     |     |     |        |         |        |      |      |
| ATOM | 13513 | CE1 | HIP | 507 | 9.276  | -91.061 | 33.239 | 1.00 | 0.00 |
| C    |       |     |     |     |        |         |        |      |      |
| ATOM | 13514 | NE2 | HIP | 507 | 9.570  | -92.283 | 33.583 | 1.00 | 0.00 |
| N    |       |     |     |     |        |         |        |      |      |
| ATOM | 13515 | CD2 | HIP | 507 | 10.826 | -92.340 | 34.091 | 1.00 | 0.00 |
| C    |       |     |     |     |        |         |        |      |      |
| ATOM | 13516 | C   | HIP | 507 | 14.944 | -90.175 | 35.003 | 1.00 | 0.00 |
| C    |       |     |     |     |        |         |        |      |      |
| ATOM | 13517 | O   | HIP | 507 | 15.825 | -90.989 | 34.708 | 1.00 | 0.00 |
| O    |       |     |     |     |        |         |        |      |      |



|      |       |     |     |     |        |         |        |      |      |
|------|-------|-----|-----|-----|--------|---------|--------|------|------|
| ATOM | 13518 | N   | GLU | 508 | 15.020 | -89.520 | 36.091 | 1.00 | 0.00 |
| N    |       |     |     |     |        |         |        |      |      |
| ATOM | 13519 | CA  | GLU | 508 | 15.950 | -89.949 | 37.157 | 1.00 | 0.00 |
| C    |       |     |     |     |        |         |        |      |      |
| ATOM | 13520 | CB  | GLU | 508 | 16.550 | -88.739 | 37.811 | 1.00 | 0.00 |
| C    |       |     |     |     |        |         |        |      |      |
| ATOM | 13521 | CG  | GLU | 508 | 17.444 | -87.831 | 36.915 | 1.00 | 0.00 |
| C    |       |     |     |     |        |         |        |      |      |
| ATOM | 13522 | CD  | GLU | 508 | 16.750 | -86.413 | 36.841 | 1.00 | 0.00 |
| C    |       |     |     |     |        |         |        |      |      |
| ATOM | 13523 | OE1 | GLU | 508 | 17.243 | -85.382 | 37.244 | 1.00 | 0.00 |
| O    |       |     |     |     |        |         |        |      |      |
| ATOM | 13524 | OE2 | GLU | 508 | 15.509 | -86.455 | 36.571 | 1.00 | 0.00 |
| O1-  |       |     |     |     |        |         |        |      |      |
| ATOM | 13525 | C   | GLU | 508 | 15.408 | -91.070 | 38.084 | 1.00 | 0.00 |
| C    |       |     |     |     |        |         |        |      |      |
| ATOM | 13526 | O   | GLU | 508 | 14.311 | -90.954 | 38.588 | 1.00 | 0.00 |
| O    |       |     |     |     |        |         |        |      |      |
| ATOM | 13527 | N   | THR | 509 | 16.286 | -92.101 | 38.229 | 1.00 | 0.00 |
| N    |       |     |     |     |        |         |        |      |      |
| ATOM | 13528 | CA  | THR | 509 | 16.103 | -93.096 | 39.358 | 1.00 | 0.00 |
| C    |       |     |     |     |        |         |        |      |      |
| ATOM | 13529 | CB  | THR | 509 | 16.508 | -94.486 | 38.832 | 1.00 | 0.00 |
| C    |       |     |     |     |        |         |        |      |      |
| ATOM | 13530 | CG2 | THR | 509 | 16.294 | -95.628 | 39.818 | 1.00 | 0.00 |
| C    |       |     |     |     |        |         |        |      |      |
| ATOM | 13531 | OG1 | THR | 509 | 15.765 | -94.785 | 37.654 | 1.00 | 0.00 |
| O    |       |     |     |     |        |         |        |      |      |
| ATOM | 13532 | C   | THR | 509 | 16.971 | -92.844 | 40.600 | 1.00 | 0.00 |
| C    |       |     |     |     |        |         |        |      |      |
| ATOM | 13533 | O   | THR | 509 | 18.147 | -92.474 | 40.478 | 1.00 | 0.00 |
| O    |       |     |     |     |        |         |        |      |      |
| ATOM | 13534 | N   | LEU | 510 | 16.456 | -93.059 | 41.809 | 1.00 | 0.00 |
| N    |       |     |     |     |        |         |        |      |      |
| ATOM | 13535 | CA  | LEU | 510 | 17.123 | -92.965 | 43.153 | 1.00 | 0.00 |
| C    |       |     |     |     |        |         |        |      |      |
| ATOM | 13536 | CB  | LEU | 510 | 16.198 | -92.125 | 44.028 | 1.00 | 0.00 |
| C    |       |     |     |     |        |         |        |      |      |
| ATOM | 13537 | CG  | LEU | 510 | 16.762 | -91.879 | 45.445 | 1.00 | 0.00 |
| C    |       |     |     |     |        |         |        |      |      |
| ATOM | 13538 | CD1 | LEU | 510 | 17.981 | -91.015 | 45.336 | 1.00 | 0.00 |
| C    |       |     |     |     |        |         |        |      |      |
| ATOM | 13539 | CD2 | LEU | 510 | 15.778 | -91.192 | 46.370 | 1.00 | 0.00 |
| C    |       |     |     |     |        |         |        |      |      |
| ATOM | 13540 | C   | LEU | 510 | 17.303 | -94.368 | 43.701 | 1.00 | 0.00 |
| C    |       |     |     |     |        |         |        |      |      |
| ATOM | 13541 | O   | LEU | 510 | 16.321 | -95.119 | 43.764 | 1.00 | 0.00 |
| O    |       |     |     |     |        |         |        |      |      |
| ATOM | 13542 | N   | THR | 511 | 18.492 | -94.788 | 44.090 | 1.00 | 0.00 |
| N    |       |     |     |     |        |         |        |      |      |
| ATOM | 13543 | CA  | THR | 511 | 18.690 | -96.058 | 44.738 | 1.00 | 0.00 |
| C    |       |     |     |     |        |         |        |      |      |
| ATOM | 13544 | CB  | THR | 511 | 20.110 | -96.548 | 44.497 | 1.00 | 0.00 |
| C    |       |     |     |     |        |         |        |      |      |

|      |       |     |     |     |        |          |        |      |      |
|------|-------|-----|-----|-----|--------|----------|--------|------|------|
| ATOM | 13545 | CG2 | THR | 511 | 20.314 | -97.286  | 43.191 | 1.00 | 0.00 |
| C    |       |     |     |     |        |          |        |      |      |
| ATOM | 13546 | OG1 | THR | 511 | 20.976 | -95.507  | 44.338 | 1.00 | 0.00 |
| O    |       |     |     |     |        |          |        |      |      |
| ATOM | 13547 | C   | THR | 511 | 18.479 | -95.891  | 46.278 | 1.00 | 0.00 |
| C    |       |     |     |     |        |          |        |      |      |
| ATOM | 13548 | O   | THR | 511 | 19.040 | -94.973  | 46.915 | 1.00 | 0.00 |
| O    |       |     |     |     |        |          |        |      |      |
| ATOM | 13549 | N   | VAL | 512 | 17.759 | -96.866  | 46.861 | 1.00 | 0.00 |
| N    |       |     |     |     |        |          |        |      |      |
| ATOM | 13550 | CA  | VAL | 512 | 17.529 | -96.865  | 48.307 | 1.00 | 0.00 |
| C    |       |     |     |     |        |          |        |      |      |
| ATOM | 13551 | CB  | VAL | 512 | 16.282 | -96.066  | 48.750 | 1.00 | 0.00 |
| C    |       |     |     |     |        |          |        |      |      |
| ATOM | 13552 | CG1 | VAL | 512 | 16.285 | -94.675  | 48.170 | 1.00 | 0.00 |
| C    |       |     |     |     |        |          |        |      |      |
| ATOM | 13553 | CG2 | VAL | 512 | 14.960 | -96.704  | 48.389 | 1.00 | 0.00 |
| C    |       |     |     |     |        |          |        |      |      |
| ATOM | 13554 | C   | VAL | 512 | 17.436 | -98.268  | 48.868 | 1.00 | 0.00 |
| C    |       |     |     |     |        |          |        |      |      |
| ATOM | 13555 | O   | VAL | 512 | 17.056 | -99.190  | 48.236 | 1.00 | 0.00 |
| O    |       |     |     |     |        |          |        |      |      |
| ATOM | 13556 | N   | TYR | 513 | 17.866 | -98.405  | 50.086 | 1.00 | 0.00 |
| N    |       |     |     |     |        |          |        |      |      |
| ATOM | 13557 | CA  | TYR | 513 | 18.045 | -99.620  | 50.949 | 1.00 | 0.00 |
| C    |       |     |     |     |        |          |        |      |      |
| ATOM | 13558 | CB  | TYR | 513 | 18.983 | -99.267  | 52.204 | 1.00 | 0.00 |
| C    |       |     |     |     |        |          |        |      |      |
| ATOM | 13559 | CG  | TYR | 513 | 20.450 | -99.172  | 51.913 | 1.00 | 0.00 |
| C    |       |     |     |     |        |          |        |      |      |
| ATOM | 13560 | CD1 | TYR | 513 | 21.196 | -99.947  | 50.989 | 1.00 | 0.00 |
| C    |       |     |     |     |        |          |        |      |      |
| ATOM | 13561 | CE1 | TYR | 513 | 22.592 | -99.911  | 50.915 | 1.00 | 0.00 |
| C    |       |     |     |     |        |          |        |      |      |
| ATOM | 13562 | CZ  | TYR | 513 | 23.299 | -99.028  | 51.799 | 1.00 | 0.00 |
| C    |       |     |     |     |        |          |        |      |      |
| ATOM | 13563 | OH  | TYR | 513 | 24.637 | -98.900  | 51.762 | 1.00 | 0.00 |
| O    |       |     |     |     |        |          |        |      |      |
| ATOM | 13564 | CE2 | TYR | 513 | 22.581 | -98.250  | 52.630 | 1.00 | 0.00 |
| C    |       |     |     |     |        |          |        |      |      |
| ATOM | 13565 | CD2 | TYR | 513 | 21.137 | -98.246  | 52.669 | 1.00 | 0.00 |
| C    |       |     |     |     |        |          |        |      |      |
| ATOM | 13566 | C   | TYR | 513 | 16.693 | -100.114 | 51.484 | 1.00 | 0.00 |
| C    |       |     |     |     |        |          |        |      |      |
| ATOM | 13567 | O   | TYR | 513 | 16.373 | -101.304 | 51.313 | 1.00 | 0.00 |
| O    |       |     |     |     |        |          |        |      |      |
| ATOM | 13568 | N   | LYS | 514 | 15.910 | -99.243  | 52.120 | 1.00 | 0.00 |
| N    |       |     |     |     |        |          |        |      |      |
| ATOM | 13569 | CA  | LYS | 514 | 14.454 | -99.508  | 52.394 | 1.00 | 0.00 |
| C    |       |     |     |     |        |          |        |      |      |
| ATOM | 13570 | CB  | LYS | 514 | 14.240 | -99.833  | 53.910 | 1.00 | 0.00 |
| C    |       |     |     |     |        |          |        |      |      |
| ATOM | 13571 | CG  | LYS | 514 | 15.093 | -100.898 | 54.459 | 1.00 | 0.00 |
| C    |       |     |     |     |        |          |        |      |      |

|      |       |     |     |     |        |          |        |      |      |
|------|-------|-----|-----|-----|--------|----------|--------|------|------|
| ATOM | 13572 | CD  | LYS | 514 | 14.668 | -101.271 | 55.923 | 1.00 | 0.00 |
| C    |       |     |     |     |        |          |        |      |      |
| ATOM | 13573 | CE  | LYS | 514 | 14.852 | -100.124 | 56.953 | 1.00 | 0.00 |
| C    |       |     |     |     |        |          |        |      |      |
| ATOM | 13574 | NZ  | LYS | 514 | 16.134 | -99.367  | 56.869 | 1.00 | 0.00 |
| N1+  |       |     |     |     |        |          |        |      |      |
| ATOM | 13575 | C   | LYS | 514 | 13.462 | -98.411  | 51.897 | 1.00 | 0.00 |
| C    |       |     |     |     |        |          |        |      |      |
| ATOM | 13576 | O   | LYS | 514 | 13.789 | -97.242  | 51.790 | 1.00 | 0.00 |
| O    |       |     |     |     |        |          |        |      |      |
| ATOM | 13577 | N   | ALA | 515 | 12.294 | -98.963  | 51.578 | 1.00 | 0.00 |
| N    |       |     |     |     |        |          |        |      |      |
| ATOM | 13578 | CA  | ALA | 515 | 11.168 | -98.240  | 51.232 | 1.00 | 0.00 |
| C    |       |     |     |     |        |          |        |      |      |
| ATOM | 13579 | CB  | ALA | 515 | 11.075 | -98.129  | 49.655 | 1.00 | 0.00 |
| C    |       |     |     |     |        |          |        |      |      |
| ATOM | 13580 | C   | ALA | 515 | 9.930  | -98.927  | 51.830 | 1.00 | 0.00 |
| C    |       |     |     |     |        |          |        |      |      |
| ATOM | 13581 | O   | ALA | 515 | 9.946  | -100.106 | 52.287 | 1.00 | 0.00 |
| O    |       |     |     |     |        |          |        |      |      |
| ATOM | 13582 | N   | CYS | 516 | 8.836  | -98.114  | 52.019 | 1.00 | 0.00 |
| N    |       |     |     |     |        |          |        |      |      |
| ATOM | 13583 | CA  | CYS | 516 | 7.590  | -98.482  | 52.730 | 1.00 | 0.00 |
| C    |       |     |     |     |        |          |        |      |      |
| ATOM | 13584 | CB  | CYS | 516 | 7.635  | -98.115  | 54.203 | 1.00 | 0.00 |
| C    |       |     |     |     |        |          |        |      |      |
| ATOM | 13585 | SG  | CYS | 516 | 6.197  | -98.874  | 55.160 | 1.00 | 0.00 |
| S    |       |     |     |     |        |          |        |      |      |
| ATOM | 13586 | C   | CYS | 516 | 6.352  | -97.864  | 52.034 | 1.00 | 0.00 |
| C    |       |     |     |     |        |          |        |      |      |
| ATOM | 13587 | O   | CYS | 516 | 6.430  | -96.863  | 51.312 | 1.00 | 0.00 |
| O    |       |     |     |     |        |          |        |      |      |
| ATOM | 13588 | N   | ASN | 517 | 5.262  | -98.496  | 52.366 | 1.00 | 0.00 |
| N    |       |     |     |     |        |          |        |      |      |
| ATOM | 13589 | CA  | ASN | 517 | 3.927  | -98.339  | 51.787 | 1.00 | 0.00 |
| C    |       |     |     |     |        |          |        |      |      |
| ATOM | 13590 | CB  | ASN | 517 | 3.556  | -96.880  | 52.175 | 1.00 | 0.00 |
| C    |       |     |     |     |        |          |        |      |      |
| ATOM | 13591 | CG  | ASN | 517 | 3.855  | -96.478  | 53.595 | 1.00 | 0.00 |
| C    |       |     |     |     |        |          |        |      |      |
| ATOM | 13592 | OD1 | ASN | 517 | 3.134  | -96.860  | 54.503 | 1.00 | 0.00 |
| O    |       |     |     |     |        |          |        |      |      |
| ATOM | 13593 | ND2 | ASN | 517 | 4.876  | -95.678  | 53.761 | 1.00 | 0.00 |
| N    |       |     |     |     |        |          |        |      |      |
| ATOM | 13594 | C   | ASN | 517 | 3.705  | -98.714  | 50.302 | 1.00 | 0.00 |
| C    |       |     |     |     |        |          |        |      |      |
| ATOM | 13595 | O   | ASN | 517 | 3.008  | -98.046  | 49.567 | 1.00 | 0.00 |
| O    |       |     |     |     |        |          |        |      |      |
| ATOM | 13596 | N   | LEU | 518 | 4.443  | -99.719  | 49.874 | 1.00 | 0.00 |
| N    |       |     |     |     |        |          |        |      |      |
| ATOM | 13597 | CA  | LEU | 518 | 4.489  | -100.186 | 48.463 | 1.00 | 0.00 |
| C    |       |     |     |     |        |          |        |      |      |
| ATOM | 13598 | CB  | LEU | 518 | 5.942  | -100.397 | 48.055 | 1.00 | 0.00 |
| C    |       |     |     |     |        |          |        |      |      |

|      |       |     |     |     |        |          |        |      |      |
|------|-------|-----|-----|-----|--------|----------|--------|------|------|
| ATOM | 13599 | CG  | LEU | 518 | 6.789  | -99.066  | 48.146 | 1.00 | 0.00 |
| C    |       |     |     |     |        |          |        |      |      |
| ATOM | 13600 | CD1 | LEU | 518 | 8.182  | -99.406  | 47.651 | 1.00 | 0.00 |
| C    |       |     |     |     |        |          |        |      |      |
| ATOM | 13601 | CD2 | LEU | 518 | 6.203  | -97.980  | 47.159 | 1.00 | 0.00 |
| C    |       |     |     |     |        |          |        |      |      |
| ATOM | 13602 | C   | LEU | 518 | 3.860  | -101.574 | 48.293 | 1.00 | 0.00 |
| C    |       |     |     |     |        |          |        |      |      |
| ATOM | 13603 | O   | LEU | 518 | 3.626  | -102.255 | 49.293 | 1.00 | 0.00 |
| O    |       |     |     |     |        |          |        |      |      |
| ATOM | 13604 | N   | ASN | 519 | 3.529  | -101.961 | 47.049 | 1.00 | 0.00 |
| N    |       |     |     |     |        |          |        |      |      |
| ATOM | 13605 | CA  | ASN | 519 | 3.385  | -103.269 | 46.526 | 1.00 | 0.00 |
| C    |       |     |     |     |        |          |        |      |      |
| ATOM | 13606 | CB  | ASN | 519 | 1.899  | -103.551 | 46.132 | 1.00 | 0.00 |
| C    |       |     |     |     |        |          |        |      |      |
| ATOM | 13607 | CG  | ASN | 519 | 0.941  | -103.366 | 47.296 | 1.00 | 0.00 |
| C    |       |     |     |     |        |          |        |      |      |
| ATOM | 13608 | OD1 | ASN | 519 | 1.224  | -103.782 | 48.434 | 1.00 | 0.00 |
| O    |       |     |     |     |        |          |        |      |      |
| ATOM | 13609 | ND2 | ASN | 519 | -0.225 | -102.752 | 47.124 | 1.00 | 0.00 |
| N    |       |     |     |     |        |          |        |      |      |
| ATOM | 13610 | C   | ASN | 519 | 4.315  | -103.550 | 45.361 | 1.00 | 0.00 |
| C    |       |     |     |     |        |          |        |      |      |
| ATOM | 13611 | O   | ASN | 519 | 4.883  | -102.658 | 44.706 | 1.00 | 0.00 |
| O    |       |     |     |     |        |          |        |      |      |
| ATOM | 13612 | N   | LEU | 520 | 4.488  | -104.856 | 45.001 | 1.00 | 0.00 |
| N    |       |     |     |     |        |          |        |      |      |
| ATOM | 13613 | CA  | LEU | 520 | 5.111  | -105.341 | 43.710 | 1.00 | 0.00 |
| C    |       |     |     |     |        |          |        |      |      |
| ATOM | 13614 | CB  | LEU | 520 | 6.057  | -106.533 | 43.894 | 1.00 | 0.00 |
| C    |       |     |     |     |        |          |        |      |      |
| ATOM | 13615 | CG  | LEU | 520 | 7.194  | -106.195 | 44.895 | 1.00 | 0.00 |
| C    |       |     |     |     |        |          |        |      |      |
| ATOM | 13616 | CD1 | LEU | 520 | 8.338  | -107.258 | 44.999 | 1.00 | 0.00 |
| C    |       |     |     |     |        |          |        |      |      |
| ATOM | 13617 | CD2 | LEU | 520 | 7.961  | -104.909 | 44.586 | 1.00 | 0.00 |
| C    |       |     |     |     |        |          |        |      |      |
| ATOM | 13618 | C   | LEU | 520 | 4.062  | -105.639 | 42.707 | 1.00 | 0.00 |
| C    |       |     |     |     |        |          |        |      |      |
| ATOM | 13619 | O   | LEU | 520 | 2.886  | -105.594 | 43.105 | 1.00 | 0.00 |
| O    |       |     |     |     |        |          |        |      |      |
| ATOM | 13620 | N   | ILE | 521 | 4.526  | -105.978 | 41.509 | 1.00 | 0.00 |
| N    |       |     |     |     |        |          |        |      |      |
| ATOM | 13621 | CA  | ILE | 521 | 3.685  | -106.490 | 40.435 | 1.00 | 0.00 |
| C    |       |     |     |     |        |          |        |      |      |
| ATOM | 13622 | CB  | ILE | 521 | 2.641  | -105.430 | 40.002 | 1.00 | 0.00 |
| C    |       |     |     |     |        |          |        |      |      |
| ATOM | 13623 | CG2 | ILE | 521 | 3.287  | -104.187 | 39.368 | 1.00 | 0.00 |
| C    |       |     |     |     |        |          |        |      |      |
| ATOM | 13624 | CG1 | ILE | 521 | 1.581  | -105.966 | 38.992 | 1.00 | 0.00 |
| C    |       |     |     |     |        |          |        |      |      |
| ATOM | 13625 | CD1 | ILE | 521 | 0.317  | -105.019 | 38.940 | 1.00 | 0.00 |
| C    |       |     |     |     |        |          |        |      |      |

|      |       |     |     |     |                |        |      |      |
|------|-------|-----|-----|-----|----------------|--------|------|------|
| ATOM | 13626 | C   | ILE | 521 | 4.477-107.195  | 39.285 | 1.00 | 0.00 |
| C    |       |     |     |     |                |        |      |      |
| ATOM | 13627 | O   | ILE | 521 | 5.596-106.813  | 38.822 | 1.00 | 0.00 |
| O    |       |     |     |     |                |        |      |      |
| ATOM | 13628 | N   | GLY | 522 | 3.776-108.248  | 38.815 | 1.00 | 0.00 |
| N    |       |     |     |     |                |        |      |      |
| ATOM | 13629 | CA  | GLY | 522 | 4.220-109.116  | 37.750 | 1.00 | 0.00 |
| C    |       |     |     |     |                |        |      |      |
| ATOM | 13630 | C   | GLY | 522 | 5.458-109.942  | 38.104 | 1.00 | 0.00 |
| C    |       |     |     |     |                |        |      |      |
| ATOM | 13631 | O   | GLY | 522 | 6.157-109.673  | 39.113 | 1.00 | 0.00 |
| O    |       |     |     |     |                |        |      |      |
| ATOM | 13632 | N   | ARG | 523 | 5.731-111.011  | 37.363 | 1.00 | 0.00 |
| N    |       |     |     |     |                |        |      |      |
| ATOM | 13633 | CA  | ARG | 523 | 6.797-111.962  | 37.627 | 1.00 | 0.00 |
| C    |       |     |     |     |                |        |      |      |
| ATOM | 13634 | CB  | ARG | 523 | 6.746-113.223  | 36.700 | 1.00 | 0.00 |
| C    |       |     |     |     |                |        |      |      |
| ATOM | 13635 | CG  | ARG | 523 | 7.236-113.068  | 35.251 | 1.00 | 0.00 |
| C    |       |     |     |     |                |        |      |      |
| ATOM | 13636 | CD  | ARG | 523 | 6.994-114.452  | 34.486 | 1.00 | 0.00 |
| C    |       |     |     |     |                |        |      |      |
| ATOM | 13637 | NE  | ARG | 523 | 7.741-115.585  | 35.095 | 1.00 | 0.00 |
| N    |       |     |     |     |                |        |      |      |
| ATOM | 13638 | CZ  | ARG | 523 | 7.708-116.847  | 34.757 | 1.00 | 0.00 |
| C    |       |     |     |     |                |        |      |      |
| ATOM | 13639 | NH1 | ARG | 523 | 8.560-117.771  | 35.231 | 1.00 | 0.00 |
| N    |       |     |     |     |                |        |      |      |
| ATOM | 13640 | NH2 | ARG | 523 | 6.743-117.222  | 33.968 | 1.00 | 0.00 |
| N1+  |       |     |     |     |                |        |      |      |
| ATOM | 13641 | C   | ARG | 523 | 8.199-111.272  | 37.601 | 1.00 | 0.00 |
| C    |       |     |     |     |                |        |      |      |
| ATOM | 13642 | O   | ARG | 523 | 8.313-110.204  | 36.945 | 1.00 | 0.00 |
| O    |       |     |     |     |                |        |      |      |
| ATOM | 13643 | N   | PRO | 524 | 9.243-111.807  | 38.262 | 1.00 | 0.00 |
| N    |       |     |     |     |                |        |      |      |
| ATOM | 13644 | CD  | PRO | 524 | 9.228-112.761  | 39.381 | 1.00 | 0.00 |
| C    |       |     |     |     |                |        |      |      |
| ATOM | 13645 | CG  | PRO | 524 | 10.317-112.246 | 40.310 | 1.00 | 0.00 |
| C    |       |     |     |     |                |        |      |      |
| ATOM | 13646 | CB  | PRO | 524 | 11.369-111.882 | 39.276 | 1.00 | 0.00 |
| C    |       |     |     |     |                |        |      |      |
| ATOM | 13647 | CA  | PRO | 524 | 10.608-111.240 | 38.192 | 1.00 | 0.00 |
| C    |       |     |     |     |                |        |      |      |
| ATOM | 13648 | C   | PRO | 524 | 11.252-111.539 | 36.809 | 1.00 | 0.00 |
| C    |       |     |     |     |                |        |      |      |
| ATOM | 13649 | O   | PRO | 524 | 10.992-112.633 | 36.239 | 1.00 | 0.00 |
| O    |       |     |     |     |                |        |      |      |
| ATOM | 13650 | N   | SER | 525 | 11.975-110.576 | 36.261 | 1.00 | 0.00 |
| N    |       |     |     |     |                |        |      |      |
| ATOM | 13651 | CA  | SER | 525 | 12.773-110.736 | 35.030 | 1.00 | 0.00 |
| C    |       |     |     |     |                |        |      |      |
| ATOM | 13652 | CB  | SER | 525 | 12.285-109.769 | 33.957 | 1.00 | 0.00 |
| C    |       |     |     |     |                |        |      |      |

|      |       |     |     |     |                |        |      |      |
|------|-------|-----|-----|-----|----------------|--------|------|------|
| ATOM | 13653 | OG  | SER | 525 | 10.925-110.011 | 33.623 | 1.00 | 0.00 |
| O    |       |     |     |     |                |        |      |      |
| ATOM | 13654 | C   | SER | 525 | 14.275-110.516 | 35.266 | 1.00 | 0.00 |
| C    |       |     |     |     |                |        |      |      |
| ATOM | 13655 | O   | SER | 525 | 14.638-109.856 | 36.227 | 1.00 | 0.00 |
| O    |       |     |     |     |                |        |      |      |
| ATOM | 13656 | N   | THR | 526 | 15.137-110.959 | 34.340 | 1.00 | 0.00 |
| N    |       |     |     |     |                |        |      |      |
| ATOM | 13657 | CA  | THR | 526 | 16.603-110.705 | 34.326 | 1.00 | 0.00 |
| C    |       |     |     |     |                |        |      |      |
| ATOM | 13658 | CB  | THR | 526 | 17.335-112.061 | 34.300 | 1.00 | 0.00 |
| C    |       |     |     |     |                |        |      |      |
| ATOM | 13659 | CG2 | THR | 526 | 18.853-111.946 | 34.238 | 1.00 | 0.00 |
| C    |       |     |     |     |                |        |      |      |
| ATOM | 13660 | OG1 | THR | 526 | 17.032-112.784 | 35.496 | 1.00 | 0.00 |
| O    |       |     |     |     |                |        |      |      |
| ATOM | 13661 | C   | THR | 526 | 17.034-109.809 | 33.113 | 1.00 | 0.00 |
| C    |       |     |     |     |                |        |      |      |
| ATOM | 13662 | O   | THR | 526 | 18.067-109.163 | 33.190 | 1.00 | 0.00 |
| O    |       |     |     |     |                |        |      |      |
| ATOM | 13663 | N   | GLU | 527 | 16.290-109.826 | 31.987 | 1.00 | 0.00 |
| N    |       |     |     |     |                |        |      |      |
| ATOM | 13664 | CA  | GLU | 527 | 16.561-108.934 | 30.829 | 1.00 | 0.00 |
| C    |       |     |     |     |                |        |      |      |
| ATOM | 13665 | CB  | GLU | 527 | 15.515-109.086 | 29.711 | 1.00 | 0.00 |
| C    |       |     |     |     |                |        |      |      |
| ATOM | 13666 | CG  | GLU | 527 | 14.121-108.562 | 30.057 | 1.00 | 0.00 |
| C    |       |     |     |     |                |        |      |      |
| ATOM | 13667 | CD  | GLU | 527 | 13.284-108.451 | 28.789 | 1.00 | 0.00 |
| C    |       |     |     |     |                |        |      |      |
| ATOM | 13668 | OE1 | GLU | 527 | 12.321-109.261 | 28.701 | 1.00 | 0.00 |
| O    |       |     |     |     |                |        |      |      |
| ATOM | 13669 | OE2 | GLU | 527 | 13.632-107.536 | 27.992 | 1.00 | 0.00 |
| O1-  |       |     |     |     |                |        |      |      |
| ATOM | 13670 | C   | GLU | 527 | 16.773-107.392 | 31.180 | 1.00 | 0.00 |
| C    |       |     |     |     |                |        |      |      |
| ATOM | 13671 | O   | GLU | 527 | 15.949-106.782 | 31.869 | 1.00 | 0.00 |
| O    |       |     |     |     |                |        |      |      |
| ATOM | 13672 | N   | HIP | 528 | 17.777-106.716 | 30.508 | 1.00 | 0.00 |
| N    |       |     |     |     |                |        |      |      |
| ATOM | 13673 | CA  | HIP | 528 | 17.849-105.247 | 30.389 | 1.00 | 0.00 |
| C    |       |     |     |     |                |        |      |      |
| ATOM | 13674 | CB  | HIP | 528 | 16.673-104.672 | 29.586 | 1.00 | 0.00 |
| C    |       |     |     |     |                |        |      |      |
| ATOM | 13675 | CG  | HIP | 528 | 16.744-105.004 | 28.150 | 1.00 | 0.00 |
| C    |       |     |     |     |                |        |      |      |
| ATOM | 13676 | ND1 | HIP | 528 | 15.726-105.654 | 27.471 | 1.00 | 0.00 |
| N1+  |       |     |     |     |                |        |      |      |
| ATOM | 13677 | CE1 | HIP | 528 | 16.035-105.785 | 26.179 | 1.00 | 0.00 |
| C    |       |     |     |     |                |        |      |      |
| ATOM | 13678 | NE2 | HIP | 528 | 17.253-105.267 | 26.019 | 1.00 | 0.00 |
| N    |       |     |     |     |                |        |      |      |
| ATOM | 13679 | CD2 | HIP | 528 | 17.706-104.755 | 27.202 | 1.00 | 0.00 |
| C    |       |     |     |     |                |        |      |      |

|      |       |     |     |     |                |        |      |      |
|------|-------|-----|-----|-----|----------------|--------|------|------|
| ATOM | 13680 | C   | HIP | 528 | 18.009-104.503 | 31.784 | 1.00 | 0.00 |
| C    |       |     |     |     |                |        |      |      |
| ATOM | 13681 | O   | HIP | 528 | 17.690-103.309 | 31.864 | 1.00 | 0.00 |
| O    |       |     |     |     |                |        |      |      |
| ATOM | 13682 | N   | SER | 529 | 18.438-105.082 | 32.949 | 1.00 | 0.00 |
| N    |       |     |     |     |                |        |      |      |
| ATOM | 13683 | CA  | SER | 529 | 18.655-104.387 | 34.223 | 1.00 | 0.00 |
| C    |       |     |     |     |                |        |      |      |
| ATOM | 13684 | CB  | SER | 529 | 19.161-105.380 | 35.278 | 1.00 | 0.00 |
| C    |       |     |     |     |                |        |      |      |
| ATOM | 13685 | OG  | SER | 529 | 19.067-104.802 | 36.574 | 1.00 | 0.00 |
| O    |       |     |     |     |                |        |      |      |
| ATOM | 13686 | C   | SER | 529 | 19.754-103.334 | 34.098 | 1.00 | 0.00 |
| C    |       |     |     |     |                |        |      |      |
| ATOM | 13687 | O   | SER | 529 | 20.678-103.439 | 33.322 | 1.00 | 0.00 |
| O    |       |     |     |     |                |        |      |      |
| ATOM | 13688 | N   | TRP | 530 | 19.575-102.215 | 34.777 | 1.00 | 0.00 |
| N    |       |     |     |     |                |        |      |      |
| ATOM | 13689 | CA  | TRP | 530 | 20.521-101.109 | 34.965 | 1.00 | 0.00 |
| C    |       |     |     |     |                |        |      |      |
| ATOM | 13690 | CB  | TRP | 530 | 19.832 -99.905 | 35.610 | 1.00 | 0.00 |
| C    |       |     |     |     |                |        |      |      |
| ATOM | 13691 | CG  | TRP | 530 | 18.772 -99.302 | 34.739 | 1.00 | 0.00 |
| C    |       |     |     |     |                |        |      |      |
| ATOM | 13692 | CD1 | TRP | 530 | 18.763 -99.269 | 33.360 | 1.00 | 0.00 |
| C    |       |     |     |     |                |        |      |      |
| ATOM | 13693 | NE1 | TRP | 530 | 17.642 -98.624 | 32.939 | 1.00 | 0.00 |
| N    |       |     |     |     |                |        |      |      |
| ATOM | 13694 | CE2 | TRP | 530 | 16.878 -98.258 | 34.015 | 1.00 | 0.00 |
| C    |       |     |     |     |                |        |      |      |
| ATOM | 13695 | CZ2 | TRP | 530 | 15.653 -97.595 | 34.047 | 1.00 | 0.00 |
| C    |       |     |     |     |                |        |      |      |
| ATOM | 13696 | CH2 | TRP | 530 | 15.101 -97.349 | 35.300 | 1.00 | 0.00 |
| C    |       |     |     |     |                |        |      |      |
| ATOM | 13697 | CZ3 | TRP | 530 | 15.732 -97.782 | 36.465 | 1.00 | 0.00 |
| C    |       |     |     |     |                |        |      |      |
| ATOM | 13698 | CE3 | TRP | 530 | 16.967 -98.429 | 36.416 | 1.00 | 0.00 |
| C    |       |     |     |     |                |        |      |      |
| ATOM | 13699 | CD2 | TRP | 530 | 17.559 -98.673 | 35.162 | 1.00 | 0.00 |
| C    |       |     |     |     |                |        |      |      |
| ATOM | 13700 | C   | TRP | 530 | 21.704-101.571 | 35.811 | 1.00 | 0.00 |
| C    |       |     |     |     |                |        |      |      |
| ATOM | 13701 | O   | TRP | 530 | 22.803-101.149 | 35.462 | 1.00 | 0.00 |
| O    |       |     |     |     |                |        |      |      |
| ATOM | 13702 | N   | PHE | 531 | 21.493-102.396 | 36.817 | 1.00 | 0.00 |
| N    |       |     |     |     |                |        |      |      |
| ATOM | 13703 | CA  | PHE | 531 | 22.587-102.890 | 37.639 | 1.00 | 0.00 |
| C    |       |     |     |     |                |        |      |      |
| ATOM | 13704 | CB  | PHE | 531 | 22.253-102.793 | 39.132 | 1.00 | 0.00 |
| C    |       |     |     |     |                |        |      |      |
| ATOM | 13705 | CG  | PHE | 531 | 21.952-101.375 | 39.556 | 1.00 | 0.00 |
| C    |       |     |     |     |                |        |      |      |
| ATOM | 13706 | CD1 | PHE | 531 | 22.985-100.493 | 39.899 | 1.00 | 0.00 |
| C    |       |     |     |     |                |        |      |      |

|      |       |     |     |     |        |          |        |      |      |
|------|-------|-----|-----|-----|--------|----------|--------|------|------|
| ATOM | 13707 | CE1 | PHE | 531 | 22.698 | -99.171  | 40.242 | 1.00 | 0.00 |
| C    |       |     |     |     |        |          |        |      |      |
| ATOM | 13708 | CZ  | PHE | 531 | 21.380 | -98.716  | 40.243 | 1.00 | 0.00 |
| C    |       |     |     |     |        |          |        |      |      |
| ATOM | 13709 | CE2 | PHE | 531 | 20.345 | -99.582  | 39.897 | 1.00 | 0.00 |
| C    |       |     |     |     |        |          |        |      |      |
| ATOM | 13710 | CD2 | PHE | 531 | 20.631 | -100.903 | 39.555 | 1.00 | 0.00 |
| C    |       |     |     |     |        |          |        |      |      |
| ATOM | 13711 | C   | PHE | 531 | 22.819 | -104.371 | 37.208 | 1.00 | 0.00 |
| C    |       |     |     |     |        |          |        |      |      |
| ATOM | 13712 | O   | PHE | 531 | 21.925 | -105.162 | 37.382 | 1.00 | 0.00 |
| O    |       |     |     |     |        |          |        |      |      |
| ATOM | 13713 | N   | PRO | 532 | 24.029 | -104.683 | 36.682 | 1.00 | 0.00 |
| N    |       |     |     |     |        |          |        |      |      |
| ATOM | 13714 | CD  | PRO | 532 | 25.124 | -103.794 | 36.382 | 1.00 | 0.00 |
| C    |       |     |     |     |        |          |        |      |      |
| ATOM | 13715 | CG  | PRO | 532 | 26.283 | -104.729 | 36.007 | 1.00 | 0.00 |
| C    |       |     |     |     |        |          |        |      |      |
| ATOM | 13716 | CB  | PRO | 532 | 25.611 | -106.014 | 35.525 | 1.00 | 0.00 |
| C    |       |     |     |     |        |          |        |      |      |
| ATOM | 13717 | CA  | PRO | 532 | 24.297 | -106.095 | 36.217 | 1.00 | 0.00 |
| C    |       |     |     |     |        |          |        |      |      |
| ATOM | 13718 | C   | PRO | 532 | 24.374 | -107.111 | 37.363 | 1.00 | 0.00 |
| C    |       |     |     |     |        |          |        |      |      |
| ATOM | 13719 | O   | PRO | 532 | 24.883 | -106.792 | 38.443 | 1.00 | 0.00 |
| O    |       |     |     |     |        |          |        |      |      |
| ATOM | 13720 | N   | GLY | 533 | 23.912 | -108.327 | 37.077 | 1.00 | 0.00 |
| N    |       |     |     |     |        |          |        |      |      |
| ATOM | 13721 | CA  | GLY | 533 | 23.929 | -109.390 | 38.075 | 1.00 | 0.00 |
| C    |       |     |     |     |        |          |        |      |      |
| ATOM | 13722 | C   | GLY | 533 | 22.783 | -109.359 | 39.041 | 1.00 | 0.00 |
| C    |       |     |     |     |        |          |        |      |      |
| ATOM | 13723 | O   | GLY | 533 | 22.534 | -110.336 | 39.804 | 1.00 | 0.00 |
| O    |       |     |     |     |        |          |        |      |      |
| ATOM | 13724 | N   | TYR | 534 | 22.048 | -108.220 | 39.052 | 1.00 | 0.00 |
| N    |       |     |     |     |        |          |        |      |      |
| ATOM | 13725 | CA  | TYR | 534 | 20.791 | -108.149 | 39.735 | 1.00 | 0.00 |
| C    |       |     |     |     |        |          |        |      |      |
| ATOM | 13726 | CB  | TYR | 534 | 20.734 | -106.672 | 40.356 | 1.00 | 0.00 |
| C    |       |     |     |     |        |          |        |      |      |
| ATOM | 13727 | CG  | TYR | 534 | 21.509 | -106.582 | 41.628 | 1.00 | 0.00 |
| C    |       |     |     |     |        |          |        |      |      |
| ATOM | 13728 | CD1 | TYR | 534 | 22.825 | -106.137 | 41.578 | 1.00 | 0.00 |
| C    |       |     |     |     |        |          |        |      |      |
| ATOM | 13729 | CE1 | TYR | 534 | 23.564 | -105.932 | 42.750 | 1.00 | 0.00 |
| C    |       |     |     |     |        |          |        |      |      |
| ATOM | 13730 | CZ  | TYR | 534 | 22.993 | -106.363 | 43.949 | 1.00 | 0.00 |
| C    |       |     |     |     |        |          |        |      |      |
| ATOM | 13731 | OH  | TYR | 534 | 23.667 | -106.273 | 45.101 | 1.00 | 0.00 |
| O    |       |     |     |     |        |          |        |      |      |
| ATOM | 13732 | CE2 | TYR | 534 | 21.706 | -106.877 | 43.991 | 1.00 | 0.00 |
| C    |       |     |     |     |        |          |        |      |      |
| ATOM | 13733 | CD2 | TYR | 534 | 20.922 | -107.026 | 42.843 | 1.00 | 0.00 |
| C    |       |     |     |     |        |          |        |      |      |



|      |       |     |     |     |                |        |      |      |
|------|-------|-----|-----|-----|----------------|--------|------|------|
| ATOM | 13734 | C   | TYR | 534 | 19.657-108.416 | 38.793 | 1.00 | 0.00 |
| C    |       |     |     |     |                |        |      |      |
| ATOM | 13735 | O   | TYR | 534 | 19.603-107.745 | 37.798 | 1.00 | 0.00 |
| O    |       |     |     |     |                |        |      |      |
| ATOM | 13736 | N   | ALA | 535 | 18.785-109.409 | 39.063 | 1.00 | 0.00 |
| N    |       |     |     |     |                |        |      |      |
| ATOM | 13737 | CA  | ALA | 535 | 17.459-109.476 | 38.443 | 1.00 | 0.00 |
| C    |       |     |     |     |                |        |      |      |
| ATOM | 13738 | CB  | ALA | 535 | 16.785-110.812 | 38.763 | 1.00 | 0.00 |
| C    |       |     |     |     |                |        |      |      |
| ATOM | 13739 | C   | ALA | 535 | 16.477-108.420 | 39.083 | 1.00 | 0.00 |
| C    |       |     |     |     |                |        |      |      |
| ATOM | 13740 | O   | ALA | 535 | 16.671-107.809 | 40.176 | 1.00 | 0.00 |
| O    |       |     |     |     |                |        |      |      |
| ATOM | 13741 | N   | TRP | 536 | 15.380-108.112 | 38.405 | 1.00 | 0.00 |
| N    |       |     |     |     |                |        |      |      |
| ATOM | 13742 | CA  | TRP | 536 | 14.370-107.105 | 38.854 | 1.00 | 0.00 |
| C    |       |     |     |     |                |        |      |      |
| ATOM | 13743 | CB  | TRP | 536 | 14.450-105.799 | 38.044 | 1.00 | 0.00 |
| C    |       |     |     |     |                |        |      |      |
| ATOM | 13744 | CG  | TRP | 536 | 14.377-105.975 | 36.562 | 1.00 | 0.00 |
| C    |       |     |     |     |                |        |      |      |
| ATOM | 13745 | CD1 | TRP | 536 | 15.484-106.131 | 35.756 | 1.00 | 0.00 |
| C    |       |     |     |     |                |        |      |      |
| ATOM | 13746 | NE1 | TRP | 536 | 15.071-106.247 | 34.467 | 1.00 | 0.00 |
| N    |       |     |     |     |                |        |      |      |
| ATOM | 13747 | CE2 | TRP | 536 | 13.703-106.177 | 34.399 | 1.00 | 0.00 |
| C    |       |     |     |     |                |        |      |      |
| ATOM | 13748 | CZ2 | TRP | 536 | 12.865-106.239 | 33.282 | 1.00 | 0.00 |
| C    |       |     |     |     |                |        |      |      |
| ATOM | 13749 | CH2 | TRP | 536 | 11.494-106.128 | 33.493 | 1.00 | 0.00 |
| C    |       |     |     |     |                |        |      |      |
| ATOM | 13750 | CZ3 | TRP | 536 | 10.984-105.952 | 34.776 | 1.00 | 0.00 |
| C    |       |     |     |     |                |        |      |      |
| ATOM | 13751 | CE3 | TRP | 536 | 11.838-105.879 | 35.886 | 1.00 | 0.00 |
| C    |       |     |     |     |                |        |      |      |
| ATOM | 13752 | CD2 | TRP | 536 | 13.231-105.999 | 35.701 | 1.00 | 0.00 |
| C    |       |     |     |     |                |        |      |      |
| ATOM | 13753 | C   | TRP | 536 | 12.939-107.594 | 38.914 | 1.00 | 0.00 |
| C    |       |     |     |     |                |        |      |      |
| ATOM | 13754 | O   | TRP | 536 | 12.573-108.676 | 38.458 | 1.00 | 0.00 |
| O    |       |     |     |     |                |        |      |      |
| ATOM | 13755 | N   | THR | 537 | 12.092-106.753 | 39.591 | 1.00 | 0.00 |
| N    |       |     |     |     |                |        |      |      |
| ATOM | 13756 | CA  | THR | 537 | 10.646-106.828 | 39.629 | 1.00 | 0.00 |
| C    |       |     |     |     |                |        |      |      |
| ATOM | 13757 | CB  | THR | 537 | 10.147-107.637 | 40.844 | 1.00 | 0.00 |
| C    |       |     |     |     |                |        |      |      |
| ATOM | 13758 | CG2 | THR | 537 | 8.645-107.899  | 40.799 | 1.00 | 0.00 |
| C    |       |     |     |     |                |        |      |      |
| ATOM | 13759 | OG1 | THR | 537 | 10.765-108.926 | 40.886 | 1.00 | 0.00 |
| O    |       |     |     |     |                |        |      |      |
| ATOM | 13760 | C   | THR | 537 | 10.013-105.372 | 39.657 | 1.00 | 0.00 |
| C    |       |     |     |     |                |        |      |      |

|      |       |     |     |     |                |        |      |      |
|------|-------|-----|-----|-----|----------------|--------|------|------|
| ATOM | 13761 | O   | THR | 537 | 10.483-104.521 | 40.375 | 1.00 | 0.00 |
| O    |       |     |     |     |                |        |      |      |
| ATOM | 13762 | N   | VAL | 538 | 8.904-105.052  | 39.038 | 1.00 | 0.00 |
| N    |       |     |     |     |                |        |      |      |
| ATOM | 13763 | CA  | VAL | 538 | 8.187-103.708  | 39.089 | 1.00 | 0.00 |
| C    |       |     |     |     |                |        |      |      |
| ATOM | 13764 | CB  | VAL | 538 | 7.186-103.640  | 37.905 | 1.00 | 0.00 |
| C    |       |     |     |     |                |        |      |      |
| ATOM | 13765 | CG1 | VAL | 538 | 6.519-102.271  | 37.832 | 1.00 | 0.00 |
| C    |       |     |     |     |                |        |      |      |
| ATOM | 13766 | CG2 | VAL | 538 | 7.859-103.929  | 36.562 | 1.00 | 0.00 |
| C    |       |     |     |     |                |        |      |      |
| ATOM | 13767 | C   | VAL | 538 | 7.426-103.411  | 40.365 | 1.00 | 0.00 |
| C    |       |     |     |     |                |        |      |      |
| ATOM | 13768 | O   | VAL | 538 | 6.807-104.300  | 40.964 | 1.00 | 0.00 |
| O    |       |     |     |     |                |        |      |      |
| ATOM | 13769 | N   | ALA | 539 | 7.483-102.174  | 40.838 | 1.00 | 0.00 |
| N    |       |     |     |     |                |        |      |      |
| ATOM | 13770 | CA  | ALA | 539 | 6.902-101.685  | 42.125 | 1.00 | 0.00 |
| C    |       |     |     |     |                |        |      |      |
| ATOM | 13771 | CB  | ALA | 539 | 7.948-101.319  | 43.170 | 1.00 | 0.00 |
| C    |       |     |     |     |                |        |      |      |
| ATOM | 13772 | C   | ALA | 539 | 6.014-100.439  | 41.981 | 1.00 | 0.00 |
| C    |       |     |     |     |                |        |      |      |
| ATOM | 13773 | O   | ALA | 539 | 6.433 -99.544  | 41.257 | 1.00 | 0.00 |
| O    |       |     |     |     |                |        |      |      |
| ATOM | 13774 | N   | GLN | 540 | 4.969-100.428  | 42.823 | 1.00 | 0.00 |
| N    |       |     |     |     |                |        |      |      |
| ATOM | 13775 | CA  | GLN | 540 | 3.852 -99.413  | 42.771 | 1.00 | 0.00 |
| C    |       |     |     |     |                |        |      |      |
| ATOM | 13776 | CB  | GLN | 540 | 2.756 -99.890  | 41.807 | 1.00 | 0.00 |
| C    |       |     |     |     |                |        |      |      |
| ATOM | 13777 | CG  | GLN | 540 | 2.265-101.313  | 42.125 | 1.00 | 0.00 |
| C    |       |     |     |     |                |        |      |      |
| ATOM | 13778 | CD  | GLN | 540 | 0.912-101.713  | 41.490 | 1.00 | 0.00 |
| C    |       |     |     |     |                |        |      |      |
| ATOM | 13779 | OE1 | GLN | 540 | -0.003-102.145 | 42.080 | 1.00 | 0.00 |
| O    |       |     |     |     |                |        |      |      |
| ATOM | 13780 | NE2 | GLN | 540 | 0.738-101.535  | 40.233 | 1.00 | 0.00 |
| N    |       |     |     |     |                |        |      |      |
| ATOM | 13781 | C   | GLN | 540 | 3.345 -99.011  | 44.129 | 1.00 | 0.00 |
| C    |       |     |     |     |                |        |      |      |
| ATOM | 13782 | O   | GLN | 540 | 3.436 -99.901  | 44.988 | 1.00 | 0.00 |
| O    |       |     |     |     |                |        |      |      |
| ATOM | 13783 | N   | CYM | 541 | 2.676 -97.871  | 44.194 | 1.00 | 0.00 |
| N    |       |     |     |     |                |        |      |      |
| ATOM | 13784 | CA  | CYM | 541 | 2.124 -97.412  | 45.451 | 1.00 | 0.00 |
| C    |       |     |     |     |                |        |      |      |
| ATOM | 13785 | CB  | CYM | 541 | 1.602 -96.005  | 45.045 | 1.00 | 0.00 |
| C    |       |     |     |     |                |        |      |      |
| ATOM | 13786 | SG  | CYM | 541 | 1.077 -95.169  | 46.581 | 1.00 | 0.00 |
| S    |       |     |     |     |                |        |      |      |
| ATOM | 13787 | C   | CYM | 541 | 1.082 -98.390  | 46.009 | 1.00 | 0.00 |
| C    |       |     |     |     |                |        |      |      |

|      |       |     |     |     |        |          |        |      |      |
|------|-------|-----|-----|-----|--------|----------|--------|------|------|
| ATOM | 13788 | O   | CYM | 541 | 0.460  | -99.197  | 45.243 | 1.00 | 0.00 |
| O    |       |     |     |     |        |          |        |      |      |
| ATOM | 13789 | N   | LYS | 542 | 0.953  | -98.431  | 47.381 | 1.00 | 0.00 |
| N    |       |     |     |     |        |          |        |      |      |
| ATOM | 13790 | CA  | LYS | 542 | -0.128 | -99.223  | 48.001 | 1.00 | 0.00 |
| C    |       |     |     |     |        |          |        |      |      |
| ATOM | 13791 | CB  | LYS | 542 | 0.351  | -99.708  | 49.363 | 1.00 | 0.00 |
| C    |       |     |     |     |        |          |        |      |      |
| ATOM | 13792 | CG  | LYS | 542 | -0.726 | -100.521 | 50.165 | 1.00 | 0.00 |
| C    |       |     |     |     |        |          |        |      |      |
| ATOM | 13793 | CD  | LYS | 542 | -0.152 | -101.212 | 51.379 | 1.00 | 0.00 |
| C    |       |     |     |     |        |          |        |      |      |
| ATOM | 13794 | CE  | LYS | 542 | 0.801  | -102.418 | 51.171 | 1.00 | 0.00 |
| C    |       |     |     |     |        |          |        |      |      |
| ATOM | 13795 | NZ  | LYS | 542 | 0.133  | -103.683 | 51.060 | 1.00 | 0.00 |
| N1+  |       |     |     |     |        |          |        |      |      |
| ATOM | 13796 | C   | LYS | 542 | -1.393 | -98.346  | 48.186 | 1.00 | 0.00 |
| C    |       |     |     |     |        |          |        |      |      |
| ATOM | 13797 | O   | LYS | 542 | -2.487 | -98.864  | 48.023 | 1.00 | 0.00 |
| O    |       |     |     |     |        |          |        |      |      |
| ATOM | 13798 | N   | ILE | 543 | -1.296 | -96.970  | 48.375 | 1.00 | 0.00 |
| N    |       |     |     |     |        |          |        |      |      |
| ATOM | 13799 | CA  | ILE | 543 | -2.372 | -95.956  | 48.479 | 1.00 | 0.00 |
| C    |       |     |     |     |        |          |        |      |      |
| ATOM | 13800 | CB  | ILE | 543 | -1.860 | -94.793  | 49.395 | 1.00 | 0.00 |
| C    |       |     |     |     |        |          |        |      |      |
| ATOM | 13801 | CG2 | ILE | 543 | -2.818 | -93.618  | 49.548 | 1.00 | 0.00 |
| C    |       |     |     |     |        |          |        |      |      |
| ATOM | 13802 | CG1 | ILE | 543 | -1.521 | -95.303  | 50.882 | 1.00 | 0.00 |
| C    |       |     |     |     |        |          |        |      |      |
| ATOM | 13803 | CD1 | ILE | 543 | -0.648 | -94.353  | 51.738 | 1.00 | 0.00 |
| C    |       |     |     |     |        |          |        |      |      |
| ATOM | 13804 | C   | ILE | 543 | -3.030 | -95.499  | 47.089 | 1.00 | 0.00 |
| C    |       |     |     |     |        |          |        |      |      |
| ATOM | 13805 | O   | ILE | 543 | -4.187 | -95.164  | 47.089 | 1.00 | 0.00 |
| O    |       |     |     |     |        |          |        |      |      |
| ATOM | 13806 | N   | CYM | 544 | -2.295 | -95.717  | 45.953 | 1.00 | 0.00 |
| N    |       |     |     |     |        |          |        |      |      |
| ATOM | 13807 | CA  | CYM | 544 | -2.851 | -95.385  | 44.628 | 1.00 | 0.00 |
| C    |       |     |     |     |        |          |        |      |      |
| ATOM | 13808 | CB  | CYM | 544 | -2.348 | -94.039  | 44.109 | 1.00 | 0.00 |
| C    |       |     |     |     |        |          |        |      |      |
| ATOM | 13809 | SG  | CYM | 544 | -0.635 | -94.148  | 43.673 | 1.00 | 0.00 |
| S    |       |     |     |     |        |          |        |      |      |
| ATOM | 13810 | C   | CYM | 544 | -2.662 | -96.479  | 43.520 | 1.00 | 0.00 |
| C    |       |     |     |     |        |          |        |      |      |
| ATOM | 13811 | O   | CYM | 544 | -3.333 | -96.305  | 42.517 | 1.00 | 0.00 |
| O    |       |     |     |     |        |          |        |      |      |
| ATOM | 13812 | N   | ALA | 545 | -1.731 | -97.430  | 43.674 | 1.00 | 0.00 |
| N    |       |     |     |     |        |          |        |      |      |
| ATOM | 13813 | CA  | ALA | 545 | -1.282 | -98.336  | 42.622 | 1.00 | 0.00 |
| C    |       |     |     |     |        |          |        |      |      |
| ATOM | 13814 | CB  | ALA | 545 | -2.398 | -99.330  | 42.265 | 1.00 | 0.00 |
| C    |       |     |     |     |        |          |        |      |      |

|      |       |     |     |     |        |         |        |      |      |
|------|-------|-----|-----|-----|--------|---------|--------|------|------|
| ATOM | 13815 | C   | ALA | 545 | -0.581 | -97.680 | 41.449 | 1.00 | 0.00 |
| C    |       |     |     |     |        |         |        |      |      |
| ATOM | 13816 | O   | ALA | 545 | -0.351 | -98.318 | 40.398 | 1.00 | 0.00 |
| O    |       |     |     |     |        |         |        |      |      |
| ATOM | 13817 | N   | SER | 546 | -0.212 | -96.382 | 41.547 | 1.00 | 0.00 |
| N    |       |     |     |     |        |         |        |      |      |
| ATOM | 13818 | CA  | SER | 546 | 0.566  | -95.762 | 40.465 | 1.00 | 0.00 |
| C    |       |     |     |     |        |         |        |      |      |
| ATOM | 13819 | CB  | SER | 546 | 0.557  | -94.256 | 40.530 | 1.00 | 0.00 |
| C    |       |     |     |     |        |         |        |      |      |
| ATOM | 13820 | OG  | SER | 546 | -0.664 | -93.634 | 40.948 | 1.00 | 0.00 |
| O    |       |     |     |     |        |         |        |      |      |
| ATOM | 13821 | C   | SER | 546 | 2.027  | -96.212 | 40.464 | 1.00 | 0.00 |
| C    |       |     |     |     |        |         |        |      |      |
| ATOM | 13822 | O   | SER | 546 | 2.604  | -96.488 | 41.516 | 1.00 | 0.00 |
| O    |       |     |     |     |        |         |        |      |      |
| ATOM | 13823 | N   | HIE | 547 | 2.681  | -96.404 | 39.294 | 1.00 | 0.00 |
| N    |       |     |     |     |        |         |        |      |      |
| ATOM | 13824 | CA  | HIE | 547 | 4.036  | -97.022 | 39.183 | 1.00 | 0.00 |
| C    |       |     |     |     |        |         |        |      |      |
| ATOM | 13825 | CB  | HIE | 547 | 4.368  | -97.131 | 37.685 | 1.00 | 0.00 |
| C    |       |     |     |     |        |         |        |      |      |
| ATOM | 13826 | CG  | HIE | 547 | 5.771  | -97.526 | 37.420 | 1.00 | 0.00 |
| C    |       |     |     |     |        |         |        |      |      |
| ATOM | 13827 | ND1 | HIE | 547 | 6.682  | -96.618 | 36.938 | 1.00 | 0.00 |
| N    |       |     |     |     |        |         |        |      |      |
| ATOM | 13828 | CE1 | HIE | 547 | 7.813  | -97.279 | 36.860 | 1.00 | 0.00 |
| C    |       |     |     |     |        |         |        |      |      |
| ATOM | 13829 | NE2 | HIE | 547 | 7.672  | -98.572 | 37.273 | 1.00 | 0.00 |
| N    |       |     |     |     |        |         |        |      |      |
| ATOM | 13830 | CD2 | HIE | 547 | 6.367  | -98.746 | 37.627 | 1.00 | 0.00 |
| C    |       |     |     |     |        |         |        |      |      |
| ATOM | 13831 | C   | HIE | 547 | 5.071  | -96.105 | 39.878 | 1.00 | 0.00 |
| C    |       |     |     |     |        |         |        |      |      |
| ATOM | 13832 | O   | HIE | 547 | 5.007  | -94.923 | 39.602 | 1.00 | 0.00 |
| O    |       |     |     |     |        |         |        |      |      |
| ATOM | 13833 | N   | ILE | 548 | 5.975  | -96.617 | 40.672 | 1.00 | 0.00 |
| N    |       |     |     |     |        |         |        |      |      |
| ATOM | 13834 | CA  | ILE | 548 | 6.961  | -95.896 | 41.425 | 1.00 | 0.00 |
| C    |       |     |     |     |        |         |        |      |      |
| ATOM | 13835 | CB  | ILE | 548 | 6.653  | -96.045 | 42.968 | 1.00 | 0.00 |
| C    |       |     |     |     |        |         |        |      |      |
| ATOM | 13836 | CG2 | ILE | 548 | 7.554  | -96.958 | 43.766 | 1.00 | 0.00 |
| C    |       |     |     |     |        |         |        |      |      |
| ATOM | 13837 | CG1 | ILE | 548 | 6.399  | -94.617 | 43.648 | 1.00 | 0.00 |
| C    |       |     |     |     |        |         |        |      |      |
| ATOM | 13838 | CD1 | ILE | 548 | 5.885  | -94.616 | 45.085 | 1.00 | 0.00 |
| C    |       |     |     |     |        |         |        |      |      |
| ATOM | 13839 | C   | ILE | 548 | 8.373  | -96.177 | 41.098 | 1.00 | 0.00 |
| C    |       |     |     |     |        |         |        |      |      |
| ATOM | 13840 | O   | ILE | 548 | 9.305  | -95.403 | 41.389 | 1.00 | 0.00 |
| O    |       |     |     |     |        |         |        |      |      |
| ATOM | 13841 | N   | GLY | 549 | 8.602  | -97.317 | 40.466 | 1.00 | 0.00 |
| N    |       |     |     |     |        |         |        |      |      |

|      |       |     |     |     |        |          |        |      |      |
|------|-------|-----|-----|-----|--------|----------|--------|------|------|
| ATOM | 13842 | CA  | GLY | 549 | 9.928  | -97.855  | 40.170 | 1.00 | 0.00 |
| C    |       |     |     |     |        |          |        |      |      |
| ATOM | 13843 | C   | GLY | 549 | 9.990  | -99.368  | 40.093 | 1.00 | 0.00 |
| C    |       |     |     |     |        |          |        |      |      |
| ATOM | 13844 | O   | GLY | 549 | 9.054  | -100.039 | 39.614 | 1.00 | 0.00 |
| O    |       |     |     |     |        |          |        |      |      |
| ATOM | 13845 | N   | TRP | 550 | 11.076 | -99.910  | 40.529 | 1.00 | 0.00 |
| N    |       |     |     |     |        |          |        |      |      |
| ATOM | 13846 | CA  | TRP | 550 | 11.413 | -101.335 | 40.576 | 1.00 | 0.00 |
| C    |       |     |     |     |        |          |        |      |      |
| ATOM | 13847 | CB  | TRP | 550 | 12.350 | -101.661 | 39.390 | 1.00 | 0.00 |
| C    |       |     |     |     |        |          |        |      |      |
| ATOM | 13848 | CG  | TRP | 550 | 11.799 | -101.224 | 38.055 | 1.00 | 0.00 |
| C    |       |     |     |     |        |          |        |      |      |
| ATOM | 13849 | CD1 | TRP | 550 | 11.109 | -102.021 | 37.168 | 1.00 | 0.00 |
| C    |       |     |     |     |        |          |        |      |      |
| ATOM | 13850 | NE1 | TRP | 550 | 10.693 | -101.253 | 36.115 | 1.00 | 0.00 |
| N    |       |     |     |     |        |          |        |      |      |
| ATOM | 13851 | CE2 | TRP | 550 | 11.110 | -99.954  | 36.272 | 1.00 | 0.00 |
| C    |       |     |     |     |        |          |        |      |      |
| ATOM | 13852 | CZ2 | TRP | 550 | 10.900 | -98.832  | 35.459 | 1.00 | 0.00 |
| C    |       |     |     |     |        |          |        |      |      |
| ATOM | 13853 | CH2 | TRP | 550 | 11.439 | -97.617  | 35.883 | 1.00 | 0.00 |
| C    |       |     |     |     |        |          |        |      |      |
| ATOM | 13854 | CZ3 | TRP | 550 | 12.166 | -97.535  | 37.067 | 1.00 | 0.00 |
| C    |       |     |     |     |        |          |        |      |      |
| ATOM | 13855 | CE3 | TRP | 550 | 12.397 | -98.672  | 37.848 | 1.00 | 0.00 |
| C    |       |     |     |     |        |          |        |      |      |
| ATOM | 13856 | CD2 | TRP | 550 | 11.838 | -99.909  | 37.464 | 1.00 | 0.00 |
| C    |       |     |     |     |        |          |        |      |      |
| ATOM | 13857 | C   | TRP | 550 | 12.057 | -101.715 | 41.906 | 1.00 | 0.00 |
| C    |       |     |     |     |        |          |        |      |      |
| ATOM | 13858 | O   | TRP | 550 | 12.569 | -100.835 | 42.611 | 1.00 | 0.00 |
| O    |       |     |     |     |        |          |        |      |      |
| ATOM | 13859 | N   | LYS | 551 | 11.858 | -102.958 | 42.343 | 1.00 | 0.00 |
| N    |       |     |     |     |        |          |        |      |      |
| ATOM | 13860 | CA  | LYS | 551 | 12.659 | -103.570 | 43.374 | 1.00 | 0.00 |
| C    |       |     |     |     |        |          |        |      |      |
| ATOM | 13861 | CB  | LYS | 551 | 11.793 | -104.402 | 44.332 | 1.00 | 0.00 |
| C    |       |     |     |     |        |          |        |      |      |
| ATOM | 13862 | CG  | LYS | 551 | 12.559 | -104.834 | 45.588 | 1.00 | 0.00 |
| C    |       |     |     |     |        |          |        |      |      |
| ATOM | 13863 | CD  | LYS | 551 | 11.764 | -105.821 | 46.444 | 1.00 | 0.00 |
| C    |       |     |     |     |        |          |        |      |      |
| ATOM | 13864 | CE  | LYS | 551 | 12.575 | -106.242 | 47.663 | 1.00 | 0.00 |
| C    |       |     |     |     |        |          |        |      |      |
| ATOM | 13865 | NZ  | LYS | 551 | 11.870 | -107.332 | 48.377 | 1.00 | 0.00 |
| N1+  |       |     |     |     |        |          |        |      |      |
| ATOM | 13866 | C   | LYS | 551 | 13.644 | -104.494 | 42.629 | 1.00 | 0.00 |
| C    |       |     |     |     |        |          |        |      |      |
| ATOM | 13867 | O   | LYS | 551 | 13.367 | -105.075 | 41.551 | 1.00 | 0.00 |
| O    |       |     |     |     |        |          |        |      |      |
| ATOM | 13868 | N   | PHE | 552 | 14.848 | -104.619 | 43.197 | 1.00 | 0.00 |
| N    |       |     |     |     |        |          |        |      |      |

|      |       |     |     |     |                |        |      |      |
|------|-------|-----|-----|-----|----------------|--------|------|------|
| ATOM | 13869 | CA  | PHE | 552 | 15.865-105.553 | 42.610 | 1.00 | 0.00 |
| C    |       |     |     |     |                |        |      |      |
| ATOM | 13870 | CB  | PHE | 552 | 17.141-104.753 | 42.283 | 1.00 | 0.00 |
| C    |       |     |     |     |                |        |      |      |
| ATOM | 13871 | CG  | PHE | 552 | 16.956-103.707 | 41.212 | 1.00 | 0.00 |
| C    |       |     |     |     |                |        |      |      |
| ATOM | 13872 | CD1 | PHE | 552 | 16.438-102.438 | 41.520 | 1.00 | 0.00 |
| C    |       |     |     |     |                |        |      |      |
| ATOM | 13873 | CE1 | PHE | 552 | 16.262-101.479 | 40.522 | 1.00 | 0.00 |
| C    |       |     |     |     |                |        |      |      |
| ATOM | 13874 | CZ  | PHE | 552 | 16.599-101.778 | 39.207 | 1.00 | 0.00 |
| C    |       |     |     |     |                |        |      |      |
| ATOM | 13875 | CE2 | PHE | 552 | 17.117-103.032 | 38.892 | 1.00 | 0.00 |
| C    |       |     |     |     |                |        |      |      |
| ATOM | 13876 | CD2 | PHE | 552 | 17.296-103.992 | 39.887 | 1.00 | 0.00 |
| C    |       |     |     |     |                |        |      |      |
| ATOM | 13877 | C   | PHE | 552 | 16.292-106.664 | 43.623 | 1.00 | 0.00 |
| C    |       |     |     |     |                |        |      |      |
| ATOM | 13878 | O   | PHE | 552 | 16.088-106.536 | 44.823 | 1.00 | 0.00 |
| O    |       |     |     |     |                |        |      |      |
| ATOM | 13879 | N   | THR | 553 | 16.748-107.729 | 43.059 | 1.00 | 0.00 |
| N    |       |     |     |     |                |        |      |      |
| ATOM | 13880 | CA  | THR | 553 | 17.150-108.987 | 43.823 | 1.00 | 0.00 |
| C    |       |     |     |     |                |        |      |      |
| ATOM | 13881 | CB  | THR | 553 | 15.938-109.865 | 43.993 | 1.00 | 0.00 |
| C    |       |     |     |     |                |        |      |      |
| ATOM | 13882 | CG2 | THR | 553 | 16.141-111.270 | 44.558 | 1.00 | 0.00 |
| C    |       |     |     |     |                |        |      |      |
| ATOM | 13883 | OG1 | THR | 553 | 14.963-109.266 | 44.893 | 1.00 | 0.00 |
| O    |       |     |     |     |                |        |      |      |
| ATOM | 13884 | C   | THR | 553 | 18.398-109.682 | 43.180 | 1.00 | 0.00 |
| C    |       |     |     |     |                |        |      |      |
| ATOM | 13885 | O   | THR | 553 | 18.522-109.844 | 41.968 | 1.00 | 0.00 |
| O    |       |     |     |     |                |        |      |      |
| ATOM | 13886 | N   | ALA | 554 | 19.319-110.183 | 44.012 | 1.00 | 0.00 |
| N    |       |     |     |     |                |        |      |      |
| ATOM | 13887 | CA  | ALA | 554 | 20.563-110.770 | 43.567 | 1.00 | 0.00 |
| C    |       |     |     |     |                |        |      |      |
| ATOM | 13888 | CB  | ALA | 554 | 21.487-111.066 | 44.807 | 1.00 | 0.00 |
| C    |       |     |     |     |                |        |      |      |
| ATOM | 13889 | C   | ALA | 554 | 20.430-112.137 | 42.777 | 1.00 | 0.00 |
| C    |       |     |     |     |                |        |      |      |
| ATOM | 13890 | O   | ALA | 554 | 19.660-113.018 | 43.130 | 1.00 | 0.00 |
| O    |       |     |     |     |                |        |      |      |
| ATOM | 13891 | N   | THR | 555 | 21.259-112.289 | 41.706 | 1.00 | 0.00 |
| N    |       |     |     |     |                |        |      |      |
| ATOM | 13892 | CA  | THR | 555 | 21.388-113.580 | 40.977 | 1.00 | 0.00 |
| C    |       |     |     |     |                |        |      |      |
| ATOM | 13893 | CB  | THR | 555 | 21.822-113.536 | 39.503 | 1.00 | 0.00 |
| C    |       |     |     |     |                |        |      |      |
| ATOM | 13894 | CG2 | THR | 555 | 20.722-112.838 | 38.737 | 1.00 | 0.00 |
| C    |       |     |     |     |                |        |      |      |
| ATOM | 13895 | OG1 | THR | 555 | 23.036-112.767 | 39.279 | 1.00 | 0.00 |
| O    |       |     |     |     |                |        |      |      |

|      |       |     |     |     |                |        |      |      |
|------|-------|-----|-----|-----|----------------|--------|------|------|
| ATOM | 13896 | C   | THR | 555 | 22.297-114.619 | 41.628 | 1.00 | 0.00 |
| C    |       |     |     |     |                |        |      |      |
| ATOM | 13897 | O   | THR | 555 | 22.184-115.830 | 41.382 | 1.00 | 0.00 |
| O    |       |     |     |     |                |        |      |      |
| ATOM | 13898 | N   | LYS | 556 | 23.220-114.188 | 42.489 | 1.00 | 0.00 |
| N    |       |     |     |     |                |        |      |      |
| ATOM | 13899 | CA  | LYS | 556 | 24.182-115.120 | 43.239 | 1.00 | 0.00 |
| C    |       |     |     |     |                |        |      |      |
| ATOM | 13900 | CB  | LYS | 556 | 25.462-115.274 | 42.487 | 1.00 | 0.00 |
| C    |       |     |     |     |                |        |      |      |
| ATOM | 13901 | CG  | LYS | 556 | 26.414-114.095 | 42.261 | 1.00 | 0.00 |
| C    |       |     |     |     |                |        |      |      |
| ATOM | 13902 | CD  | LYS | 556 | 27.632-114.571 | 41.355 | 1.00 | 0.00 |
| C    |       |     |     |     |                |        |      |      |
| ATOM | 13903 | CE  | LYS | 556 | 28.608-113.489 | 41.070 | 1.00 | 0.00 |
| C    |       |     |     |     |                |        |      |      |
| ATOM | 13904 | NZ  | LYS | 556 | 27.981-112.319 | 40.435 | 1.00 | 0.00 |
| N1+  |       |     |     |     |                |        |      |      |
| ATOM | 13905 | C   | LYS | 556 | 24.528-114.593 | 44.657 | 1.00 | 0.00 |
| C    |       |     |     |     |                |        |      |      |
| ATOM | 13906 | O   | LYS | 556 | 24.498-113.401 | 44.975 | 1.00 | 0.00 |
| O    |       |     |     |     |                |        |      |      |
| ATOM | 13907 | N   | LYS | 557 | 25.009-115.436 | 45.558 | 1.00 | 0.00 |
| N    |       |     |     |     |                |        |      |      |
| ATOM | 13908 | CA  | LYS | 557 | 24.883-115.315 | 47.001 | 1.00 | 0.00 |
| C    |       |     |     |     |                |        |      |      |
| ATOM | 13909 | CB  | LYS | 557 | 25.294-116.678 | 47.591 | 1.00 | 0.00 |
| C    |       |     |     |     |                |        |      |      |
| ATOM | 13910 | CG  | LYS | 557 | 24.270-117.797 | 47.351 | 1.00 | 0.00 |
| C    |       |     |     |     |                |        |      |      |
| ATOM | 13911 | CD  | LYS | 557 | 24.795-119.217 | 47.649 | 1.00 | 0.00 |
| C    |       |     |     |     |                |        |      |      |
| ATOM | 13912 | CE  | LYS | 557 | 25.068-119.492 | 49.131 | 1.00 | 0.00 |
| C    |       |     |     |     |                |        |      |      |
| ATOM | 13913 | NZ  | LYS | 557 | 23.921-119.229 | 49.987 | 1.00 | 0.00 |
| N1+  |       |     |     |     |                |        |      |      |
| ATOM | 13914 | C   | LYS | 557 | 25.890-114.244 | 47.488 | 1.00 | 0.00 |
| C    |       |     |     |     |                |        |      |      |
| ATOM | 13915 | O   | LYS | 557 | 25.601-113.669 | 48.492 | 1.00 | 0.00 |
| O    |       |     |     |     |                |        |      |      |
| ATOM | 13916 | N   | ASP | 558 | 27.004-114.001 | 46.870 | 1.00 | 0.00 |
| N    |       |     |     |     |                |        |      |      |
| ATOM | 13917 | CA  | ASP | 558 | 28.090-113.089 | 47.294 | 1.00 | 0.00 |
| C    |       |     |     |     |                |        |      |      |
| ATOM | 13918 | CB  | ASP | 558 | 29.346-113.626 | 46.752 | 1.00 | 0.00 |
| C    |       |     |     |     |                |        |      |      |
| ATOM | 13919 | CG  | ASP | 558 | 29.700-115.054 | 47.186 | 1.00 | 0.00 |
| C    |       |     |     |     |                |        |      |      |
| ATOM | 13920 | OD1 | ASP | 558 | 30.047-115.934 | 46.390 | 1.00 | 0.00 |
| O    |       |     |     |     |                |        |      |      |
| ATOM | 13921 | OD2 | ASP | 558 | 29.864-115.234 | 48.430 | 1.00 | 0.00 |
| O1-  |       |     |     |     |                |        |      |      |
| ATOM | 13922 | C   | ASP | 558 | 27.920-111.594 | 46.959 | 1.00 | 0.00 |
| C    |       |     |     |     |                |        |      |      |

|      |       |    |     |     |                |        |      |      |
|------|-------|----|-----|-----|----------------|--------|------|------|
| ATOM | 13923 | O  | ASP | 558 | 28.696-110.733 | 47.304 | 1.00 | 0.00 |
| O    |       |    |     |     |                |        |      |      |
| ATOM | 13924 | N  | MET | 559 | 26.751-111.285 | 46.307 | 1.00 | 0.00 |
| N    |       |    |     |     |                |        |      |      |
| ATOM | 13925 | CA | MET | 559 | 26.306-109.939 | 45.990 | 1.00 | 0.00 |
| C    |       |    |     |     |                |        |      |      |
| ATOM | 13926 | CB | MET | 559 | 25.252-109.983 | 44.859 | 1.00 | 0.00 |
| C    |       |    |     |     |                |        |      |      |
| ATOM | 13927 | CG | MET | 559 | 25.736-110.683 | 43.560 | 1.00 | 0.00 |
| C    |       |    |     |     |                |        |      |      |
| ATOM | 13928 | SD | MET | 559 | 24.862-110.240 | 41.986 | 1.00 | 0.00 |
| S    |       |    |     |     |                |        |      |      |
| ATOM | 13929 | CE | MET | 559 | 25.554-108.568 | 41.602 | 1.00 | 0.00 |
| C    |       |    |     |     |                |        |      |      |
| ATOM | 13930 | C  | MET | 559 | 25.661-109.241 | 47.250 | 1.00 | 0.00 |
| C    |       |    |     |     |                |        |      |      |
| ATOM | 13931 | O  | MET | 559 | 24.698-109.771 | 47.832 | 1.00 | 0.00 |
| O    |       |    |     |     |                |        |      |      |
| ATOM | 13932 | N  | SER | 560 | 26.124-108.025 | 47.635 | 1.00 | 0.00 |
| N    |       |    |     |     |                |        |      |      |
| ATOM | 13933 | CA | SER | 560 | 25.471-107.174 | 48.626 | 1.00 | 0.00 |
| C    |       |    |     |     |                |        |      |      |
| ATOM | 13934 | CB | SER | 560 | 26.344-107.007 | 49.787 | 1.00 | 0.00 |
| C    |       |    |     |     |                |        |      |      |
| ATOM | 13935 | OG | SER | 560 | 25.839-106.218 | 50.808 | 1.00 | 0.00 |
| O    |       |    |     |     |                |        |      |      |
| ATOM | 13936 | C  | SER | 560 | 25.135-105.771 | 48.003 | 1.00 | 0.00 |
| C    |       |    |     |     |                |        |      |      |
| ATOM | 13937 | O  | SER | 560 | 25.945-105.210 | 47.240 | 1.00 | 0.00 |
| O    |       |    |     |     |                |        |      |      |
| ATOM | 13938 | N  | PRO | 561 | 24.012-105.162 | 48.442 | 1.00 | 0.00 |
| N    |       |    |     |     |                |        |      |      |
| ATOM | 13939 | CD | PRO | 561 | 23.780-103.831 | 47.917 | 1.00 | 0.00 |
| C    |       |    |     |     |                |        |      |      |
| ATOM | 13940 | CG | PRO | 561 | 22.364-103.468 | 48.473 | 1.00 | 0.00 |
| C    |       |    |     |     |                |        |      |      |
| ATOM | 13941 | CB | PRO | 561 | 22.117-104.516 | 49.576 | 1.00 | 0.00 |
| C    |       |    |     |     |                |        |      |      |
| ATOM | 13942 | CA | PRO | 561 | 22.914-105.725 | 49.167 | 1.00 | 0.00 |
| C    |       |    |     |     |                |        |      |      |
| ATOM | 13943 | C  | PRO | 561 | 22.063-106.624 | 48.341 | 1.00 | 0.00 |
| C    |       |    |     |     |                |        |      |      |
| ATOM | 13944 | O  | PRO | 561 | 21.929-106.436 | 47.137 | 1.00 | 0.00 |
| O    |       |    |     |     |                |        |      |      |
| ATOM | 13945 | N  | GLN | 562 | 21.450-107.624 | 48.974 | 1.00 | 0.00 |
| N    |       |    |     |     |                |        |      |      |
| ATOM | 13946 | CA | GLN | 562 | 20.714-108.693 | 48.285 | 1.00 | 0.00 |
| C    |       |    |     |     |                |        |      |      |
| ATOM | 13947 | CB | GLN | 562 | 20.419-109.902 | 49.171 | 1.00 | 0.00 |
| C    |       |    |     |     |                |        |      |      |
| ATOM | 13948 | CG | GLN | 562 | 21.675-110.755 | 49.505 | 1.00 | 0.00 |
| C    |       |    |     |     |                |        |      |      |
| ATOM | 13949 | CD | GLN | 562 | 21.880-111.889 | 48.550 | 1.00 | 0.00 |
| C    |       |    |     |     |                |        |      |      |



|      |       |     |     |     |                |        |      |      |
|------|-------|-----|-----|-----|----------------|--------|------|------|
| ATOM | 13950 | OE1 | GLN | 562 | 21.006-112.737 | 48.402 | 1.00 | 0.00 |
| O    |       |     |     |     |                |        |      |      |
| ATOM | 13951 | NE2 | GLN | 562 | 22.975-111.955 | 47.866 | 1.00 | 0.00 |
| N    |       |     |     |     |                |        |      |      |
| ATOM | 13952 | C   | GLN | 562 | 19.387-108.290 | 47.640 | 1.00 | 0.00 |
| C    |       |     |     |     |                |        |      |      |
| ATOM | 13953 | O   | GLN | 562 | 19.067-108.735 | 46.554 | 1.00 | 0.00 |
| O    |       |     |     |     |                |        |      |      |
| ATOM | 13954 | N   | LYS | 563 | 18.736-107.346 | 48.359 | 1.00 | 0.00 |
| N    |       |     |     |     |                |        |      |      |
| ATOM | 13955 | CA  | LYS | 563 | 17.634-106.520 | 47.804 | 1.00 | 0.00 |
| C    |       |     |     |     |                |        |      |      |
| ATOM | 13956 | CB  | LYS | 563 | 16.284-107.097 | 48.282 | 1.00 | 0.00 |
| C    |       |     |     |     |                |        |      |      |
| ATOM | 13957 | CG  | LYS | 563 | 15.801-108.454 | 47.689 | 1.00 | 0.00 |
| C    |       |     |     |     |                |        |      |      |
| ATOM | 13958 | CD  | LYS | 563 | 16.202-109.683 | 48.608 | 1.00 | 0.00 |
| C    |       |     |     |     |                |        |      |      |
| ATOM | 13959 | CE  | LYS | 563 | 15.630-111.067 | 48.107 | 1.00 | 0.00 |
| C    |       |     |     |     |                |        |      |      |
| ATOM | 13960 | NZ  | LYS | 563 | 15.596-112.137 | 49.125 | 1.00 | 0.00 |
| N1+  |       |     |     |     |                |        |      |      |
| ATOM | 13961 | C   | LYS | 563 | 17.703-105.057 | 48.156 | 1.00 | 0.00 |
| C    |       |     |     |     |                |        |      |      |
| ATOM | 13962 | O   | LYS | 563 | 18.105-104.647 | 49.257 | 1.00 | 0.00 |
| O    |       |     |     |     |                |        |      |      |
| ATOM | 13963 | N   | PHE | 564 | 17.175-104.234 | 47.267 | 1.00 | 0.00 |
| N    |       |     |     |     |                |        |      |      |
| ATOM | 13964 | CA  | PHE | 564 | 17.090-102.809 | 47.407 | 1.00 | 0.00 |
| C    |       |     |     |     |                |        |      |      |
| ATOM | 13965 | CB  | PHE | 564 | 18.475-102.180 | 47.150 | 1.00 | 0.00 |
| C    |       |     |     |     |                |        |      |      |
| ATOM | 13966 | CG  | PHE | 564 | 19.002-102.213 | 45.680 | 1.00 | 0.00 |
| C    |       |     |     |     |                |        |      |      |
| ATOM | 13967 | CD1 | PHE | 564 | 18.810-101.166 | 44.785 | 1.00 | 0.00 |
| C    |       |     |     |     |                |        |      |      |
| ATOM | 13968 | CE1 | PHE | 564 | 19.276-101.275 | 43.442 | 1.00 | 0.00 |
| C    |       |     |     |     |                |        |      |      |
| ATOM | 13969 | CZ  | PHE | 564 | 19.916-102.448 | 42.985 | 1.00 | 0.00 |
| C    |       |     |     |     |                |        |      |      |
| ATOM | 13970 | CE2 | PHE | 564 | 20.110-103.521 | 43.885 | 1.00 | 0.00 |
| C    |       |     |     |     |                |        |      |      |
| ATOM | 13971 | CD2 | PHE | 564 | 19.641-103.384 | 45.204 | 1.00 | 0.00 |
| C    |       |     |     |     |                |        |      |      |
| ATOM | 13972 | C   | PHE | 564 | 16.077-102.328 | 46.360 | 1.00 | 0.00 |
| C    |       |     |     |     |                |        |      |      |
| ATOM | 13973 | O   | PHE | 564 | 15.712-103.020 | 45.399 | 1.00 | 0.00 |
| O    |       |     |     |     |                |        |      |      |
| ATOM | 13974 | N   | TRP | 565 | 15.768-101.023 | 46.460 | 1.00 | 0.00 |
| N    |       |     |     |     |                |        |      |      |
| ATOM | 13975 | CA  | TRP | 565 | 14.823-100.323 | 45.594 | 1.00 | 0.00 |
| C    |       |     |     |     |                |        |      |      |
| ATOM | 13976 | CB  | TRP | 565 | 13.631 -99.739 | 46.366 | 1.00 | 0.00 |
| C    |       |     |     |     |                |        |      |      |

|      |       |     |     |     |                |        |      |      |
|------|-------|-----|-----|-----|----------------|--------|------|------|
| ATOM | 13977 | CG  | TRP | 565 | 12.772-100.771 | 46.967 | 1.00 | 0.00 |
| C    |       |     |     |     |                |        |      |      |
| ATOM | 13978 | CD1 | TRP | 565 | 11.528-101.045 | 46.491 | 1.00 | 0.00 |
| C    |       |     |     |     |                |        |      |      |
| ATOM | 13979 | NE1 | TRP | 565 | 10.941-101.999 | 47.278 | 1.00 | 0.00 |
| N    |       |     |     |     |                |        |      |      |
| ATOM | 13980 | CE2 | TRP | 565 | 11.720-102.397 | 48.315 | 1.00 | 0.00 |
| C    |       |     |     |     |                |        |      |      |
| ATOM | 13981 | CZ2 | TRP | 565 | 11.506-103.252 | 49.386 | 1.00 | 0.00 |
| C    |       |     |     |     |                |        |      |      |
| ATOM | 13982 | CH2 | TRP | 565 | 12.615-103.500 | 50.297 | 1.00 | 0.00 |
| C    |       |     |     |     |                |        |      |      |
| ATOM | 13983 | CZ3 | TRP | 565 | 13.720-102.660 | 50.256 | 1.00 | 0.00 |
| C    |       |     |     |     |                |        |      |      |
| ATOM | 13984 | CE3 | TRP | 565 | 13.817-101.749 | 49.219 | 1.00 | 0.00 |
| C    |       |     |     |     |                |        |      |      |
| ATOM | 13985 | CD2 | TRP | 565 | 12.875-101.643 | 48.158 | 1.00 | 0.00 |
| C    |       |     |     |     |                |        |      |      |
| ATOM | 13986 | C   | TRP | 565 | 15.528 -99.363 | 44.702 | 1.00 | 0.00 |
| C    |       |     |     |     |                |        |      |      |
| ATOM | 13987 | O   | TRP | 565 | 16.572 -98.748 | 45.016 | 1.00 | 0.00 |
| O    |       |     |     |     |                |        |      |      |
| ATOM | 13988 | N   | GLY | 566 | 15.014 -99.244 | 43.488 | 1.00 | 0.00 |
| N    |       |     |     |     |                |        |      |      |
| ATOM | 13989 | CA  | GLY | 566 | 15.282 -98.155 | 42.572 | 1.00 | 0.00 |
| C    |       |     |     |     |                |        |      |      |
| ATOM | 13990 | C   | GLY | 566 | 13.966 -97.406 | 42.270 | 1.00 | 0.00 |
| C    |       |     |     |     |                |        |      |      |
| ATOM | 13991 | O   | GLY | 566 | 13.078 -97.917 | 41.587 | 1.00 | 0.00 |
| O    |       |     |     |     |                |        |      |      |
| ATOM | 13992 | N   | LEU | 567 | 13.876 -96.187 | 42.861 | 1.00 | 0.00 |
| N    |       |     |     |     |                |        |      |      |
| ATOM | 13993 | CA  | LEU | 567 | 12.646 -95.416 | 42.733 | 1.00 | 0.00 |
| C    |       |     |     |     |                |        |      |      |
| ATOM | 13994 | CB  | LEU | 567 | 12.417 -94.927 | 44.187 | 1.00 | 0.00 |
| C    |       |     |     |     |                |        |      |      |
| ATOM | 13995 | CG  | LEU | 567 | 12.399 -95.914 | 45.259 | 1.00 | 0.00 |
| C    |       |     |     |     |                |        |      |      |
| ATOM | 13996 | CD1 | LEU | 567 | 12.239 -95.072 | 46.608 | 1.00 | 0.00 |
| C    |       |     |     |     |                |        |      |      |
| ATOM | 13997 | CD2 | LEU | 567 | 11.346 -97.018 | 45.122 | 1.00 | 0.00 |
| C    |       |     |     |     |                |        |      |      |
| ATOM | 13998 | C   | LEU | 567 | 12.754 -94.251 | 41.686 | 1.00 | 0.00 |
| C    |       |     |     |     |                |        |      |      |
| ATOM | 13999 | O   | LEU | 567 | 13.889 -93.801 | 41.503 | 1.00 | 0.00 |
| O    |       |     |     |     |                |        |      |      |
| ATOM | 14000 | N   | THR | 568 | 11.682 -93.797 | 40.959 | 1.00 | 0.00 |
| N    |       |     |     |     |                |        |      |      |
| ATOM | 14001 | CA  | THR | 568 | 11.853 -92.737 | 39.853 | 1.00 | 0.00 |
| C    |       |     |     |     |                |        |      |      |
| ATOM | 14002 | CB  | THR | 568 | 11.156 -93.011 | 38.506 | 1.00 | 0.00 |
| C    |       |     |     |     |                |        |      |      |
| ATOM | 14003 | CG2 | THR | 568 | 9.569 -93.128  | 38.503 | 1.00 | 0.00 |
| C    |       |     |     |     |                |        |      |      |

|      |       |     |     |     |        |         |        |      |      |
|------|-------|-----|-----|-----|--------|---------|--------|------|------|
| ATOM | 14004 | OG1 | THR | 568 | 11.473 | -91.843 | 37.709 | 1.00 | 0.00 |
| O    |       |     |     |     |        |         |        |      |      |
| ATOM | 14005 | C   | THR | 568 | 11.463 | -91.399 | 40.445 | 1.00 | 0.00 |
| C    |       |     |     |     |        |         |        |      |      |
| ATOM | 14006 | O   | THR | 568 | 10.360 | -91.220 | 40.952 | 1.00 | 0.00 |
| O    |       |     |     |     |        |         |        |      |      |
| ATOM | 14007 | N   | ARG | 569 | 12.192 | -90.339 | 40.091 | 1.00 | 0.00 |
| N    |       |     |     |     |        |         |        |      |      |
| ATOM | 14008 | CA  | ARG | 569 | 11.947 | -88.930 | 40.408 | 1.00 | 0.00 |
| C    |       |     |     |     |        |         |        |      |      |
| ATOM | 14009 | CB  | ARG | 569 | 13.159 | -88.124 | 39.997 | 1.00 | 0.00 |
| C    |       |     |     |     |        |         |        |      |      |
| ATOM | 14010 | CG  | ARG | 569 | 13.485 | -86.958 | 40.889 | 1.00 | 0.00 |
| C    |       |     |     |     |        |         |        |      |      |
| ATOM | 14011 | CD  | ARG | 569 | 14.627 | -86.038 | 40.461 | 1.00 | 0.00 |
| C    |       |     |     |     |        |         |        |      |      |
| ATOM | 14012 | NE  | ARG | 569 | 14.531 | -85.605 | 39.042 | 1.00 | 0.00 |
| N    |       |     |     |     |        |         |        |      |      |
| ATOM | 14013 | CZ  | ARG | 569 | 13.723 | -84.693 | 38.515 | 1.00 | 0.00 |
| C    |       |     |     |     |        |         |        |      |      |
| ATOM | 14014 | NH1 | ARG | 569 | 13.933 | -84.330 | 37.288 | 1.00 | 0.00 |
| N    |       |     |     |     |        |         |        |      |      |
| ATOM | 14015 | NH2 | ARG | 569 | 12.698 | -84.124 | 39.154 | 1.00 | 0.00 |
| N1+  |       |     |     |     |        |         |        |      |      |
| ATOM | 14016 | C   | ARG | 569 | 10.647 | -88.398 | 39.737 | 1.00 | 0.00 |
| C    |       |     |     |     |        |         |        |      |      |
| ATOM | 14017 | O   | ARG | 569 | 9.996  | -87.418 | 40.173 | 1.00 | 0.00 |
| O    |       |     |     |     |        |         |        |      |      |
| ATOM | 14018 | N   | SER | 570 | 10.214 | -89.041 | 38.710 | 1.00 | 0.00 |
| N    |       |     |     |     |        |         |        |      |      |
| ATOM | 14019 | CA  | SER | 570 | 8.904  | -88.835 | 38.095 | 1.00 | 0.00 |
| C    |       |     |     |     |        |         |        |      |      |
| ATOM | 14020 | CB  | SER | 570 | 8.891  | -89.603 | 36.725 | 1.00 | 0.00 |
| C    |       |     |     |     |        |         |        |      |      |
| ATOM | 14021 | OG  | SER | 570 | 7.577  | -89.556 | 36.184 | 1.00 | 0.00 |
| O    |       |     |     |     |        |         |        |      |      |
| ATOM | 14022 | C   | SER | 570 | 7.729  | -89.121 | 39.115 | 1.00 | 0.00 |
| C    |       |     |     |     |        |         |        |      |      |
| ATOM | 14023 | O   | SER | 570 | 6.665  | -88.503 | 38.945 | 1.00 | 0.00 |
| O    |       |     |     |     |        |         |        |      |      |
| ATOM | 14024 | N   | ALA | 571 | 7.900  | -90.018 | 40.077 | 1.00 | 0.00 |
| N    |       |     |     |     |        |         |        |      |      |
| ATOM | 14025 | CA  | ALA | 571 | 6.778  | -90.574 | 40.851 | 1.00 | 0.00 |
| C    |       |     |     |     |        |         |        |      |      |
| ATOM | 14026 | CB  | ALA | 571 | 6.762  | -92.088 | 40.591 | 1.00 | 0.00 |
| C    |       |     |     |     |        |         |        |      |      |
| ATOM | 14027 | C   | ALA | 571 | 6.913  | -90.332 | 42.313 | 1.00 | 0.00 |
| C    |       |     |     |     |        |         |        |      |      |
| ATOM | 14028 | O   | ALA | 571 | 5.907  | -90.077 | 42.975 | 1.00 | 0.00 |
| O    |       |     |     |     |        |         |        |      |      |
| ATOM | 14029 | N   | LEU | 572 | 8.149  | -90.285 | 42.843 | 1.00 | 0.00 |
| N    |       |     |     |     |        |         |        |      |      |
| ATOM | 14030 | CA  | LEU | 572 | 8.413  | -89.766 | 44.217 | 1.00 | 0.00 |
| C    |       |     |     |     |        |         |        |      |      |

|      |       |     |     |     |        |         |        |      |      |
|------|-------|-----|-----|-----|--------|---------|--------|------|------|
| ATOM | 14031 | CB  | LEU | 572 | 9.923  | -89.855 | 44.517 | 1.00 | 0.00 |
| C    |       |     |     |     |        |         |        |      |      |
| ATOM | 14032 | CG  | LEU | 572 | 10.370 | -91.276 | 44.773 | 1.00 | 0.00 |
| C    |       |     |     |     |        |         |        |      |      |
| ATOM | 14033 | CD1 | LEU | 572 | 11.939 | -91.310 | 44.986 | 1.00 | 0.00 |
| C    |       |     |     |     |        |         |        |      |      |
| ATOM | 14034 | CD2 | LEU | 572 | 9.555  | -91.871 | 45.953 | 1.00 | 0.00 |
| C    |       |     |     |     |        |         |        |      |      |
| ATOM | 14035 | C   | LEU | 572 | 8.007  | -88.241 | 44.387 | 1.00 | 0.00 |
| C    |       |     |     |     |        |         |        |      |      |
| ATOM | 14036 | O   | LEU | 572 | 7.945  | -87.478 | 43.426 | 1.00 | 0.00 |
| O    |       |     |     |     |        |         |        |      |      |
| ATOM | 14037 | N   | LEU | 573 | 7.866  | -87.706 | 45.637 | 1.00 | 0.00 |
| N    |       |     |     |     |        |         |        |      |      |
| ATOM | 14038 | CA  | LEU | 573 | 7.669  | -86.270 | 45.925 | 1.00 | 0.00 |
| C    |       |     |     |     |        |         |        |      |      |
| ATOM | 14039 | CB  | LEU | 573 | 6.136  | -86.043 | 45.796 | 1.00 | 0.00 |
| C    |       |     |     |     |        |         |        |      |      |
| ATOM | 14040 | CG  | LEU | 573 | 5.698  | -84.625 | 46.169 | 1.00 | 0.00 |
| C    |       |     |     |     |        |         |        |      |      |
| ATOM | 14041 | CD1 | LEU | 573 | 5.955  | -83.598 | 45.086 | 1.00 | 0.00 |
| C    |       |     |     |     |        |         |        |      |      |
| ATOM | 14042 | CD2 | LEU | 573 | 4.203  | -84.531 | 46.342 | 1.00 | 0.00 |
| C    |       |     |     |     |        |         |        |      |      |
| ATOM | 14043 | C   | LEU | 573 | 8.259  | -85.821 | 47.273 | 1.00 | 0.00 |
| C    |       |     |     |     |        |         |        |      |      |
| ATOM | 14044 | O   | LEU | 573 | 7.753  | -86.257 | 48.349 | 1.00 | 0.00 |
| O    |       |     |     |     |        |         |        |      |      |
| ATOM | 14045 | N   | PRO | 574 | 9.219  | -84.803 | 47.346 | 1.00 | 0.00 |
| N    |       |     |     |     |        |         |        |      |      |
| ATOM | 14046 | CD  | PRO | 574 | 9.998  | -84.371 | 46.170 | 1.00 | 0.00 |
| C    |       |     |     |     |        |         |        |      |      |
| ATOM | 14047 | CG  | PRO | 574 | 11.198 | -83.743 | 46.740 | 1.00 | 0.00 |
| C    |       |     |     |     |        |         |        |      |      |
| ATOM | 14048 | CB  | PRO | 574 | 10.780 | -83.242 | 48.103 | 1.00 | 0.00 |
| C    |       |     |     |     |        |         |        |      |      |
| ATOM | 14049 | CA  | PRO | 574 | 9.652  | -84.226 | 48.590 | 1.00 | 0.00 |
| C    |       |     |     |     |        |         |        |      |      |
| ATOM | 14050 | C   | PRO | 574 | 8.518  | -83.471 | 49.303 | 1.00 | 0.00 |
| C    |       |     |     |     |        |         |        |      |      |
| ATOM | 14051 | O   | PRO | 574 | 7.832  | -82.581 | 48.709 | 1.00 | 0.00 |
| O    |       |     |     |     |        |         |        |      |      |
| ATOM | 14052 | N   | THR | 575 | 8.277  | -83.768 | 50.595 | 1.00 | 0.00 |
| N    |       |     |     |     |        |         |        |      |      |
| ATOM | 14053 | CA  | THR | 575 | 7.222  | -82.978 | 51.408 | 1.00 | 0.00 |
| C    |       |     |     |     |        |         |        |      |      |
| ATOM | 14054 | CB  | THR | 575 | 6.100  | -84.017 | 51.823 | 1.00 | 0.00 |
| C    |       |     |     |     |        |         |        |      |      |
| ATOM | 14055 | CG2 | THR | 575 | 5.159  | -84.530 | 50.762 | 1.00 | 0.00 |
| C    |       |     |     |     |        |         |        |      |      |
| ATOM | 14056 | OG1 | THR | 575 | 6.660  | -85.153 | 52.510 | 1.00 | 0.00 |
| O    |       |     |     |     |        |         |        |      |      |
| ATOM | 14057 | C   | THR | 575 | 7.712  | -82.283 | 52.684 | 1.00 | 0.00 |
| C    |       |     |     |     |        |         |        |      |      |

|      |       |     |     |     |        |         |        |      |      |
|------|-------|-----|-----|-----|--------|---------|--------|------|------|
| ATOM | 14058 | O   | THR | 575 | 8.878  | -82.513 | 53.102 | 1.00 | 0.00 |
| O    |       |     |     |     |        |         |        |      |      |
| ATOM | 14059 | N   | ILE | 576 | 6.863  | -81.529 | 53.381 | 1.00 | 0.00 |
| N    |       |     |     |     |        |         |        |      |      |
| ATOM | 14060 | CA  | ILE | 576 | 7.280  | -80.805 | 54.626 | 1.00 | 0.00 |
| C    |       |     |     |     |        |         |        |      |      |
| ATOM | 14061 | CB  | ILE | 576 | 6.162  | -79.801 | 54.973 | 1.00 | 0.00 |
| C    |       |     |     |     |        |         |        |      |      |
| ATOM | 14062 | CG2 | ILE | 576 | 6.244  | -79.219 | 56.291 | 1.00 | 0.00 |
| C    |       |     |     |     |        |         |        |      |      |
| ATOM | 14063 | CG1 | ILE | 576 | 6.277  | -78.622 | 53.996 | 1.00 | 0.00 |
| C    |       |     |     |     |        |         |        |      |      |
| ATOM | 14064 | CD1 | ILE | 576 | 5.413  | -77.341 | 54.198 | 1.00 | 0.00 |
| C    |       |     |     |     |        |         |        |      |      |
| ATOM | 14065 | C   | ILE | 576 | 7.629  | -81.844 | 55.663 | 1.00 | 0.00 |
| C    |       |     |     |     |        |         |        |      |      |
| ATOM | 14066 | O   | ILE | 576 | 6.646  | -82.566 | 56.098 | 1.00 | 0.00 |
| O    |       |     |     |     |        |         |        |      |      |
| ATOM | 14067 | N   | PRO | 577 | 8.817  | -81.868 | 56.241 | 1.00 | 0.00 |
| N    |       |     |     |     |        |         |        |      |      |
| ATOM | 14068 | CD  | PRO | 577 | 10.079 | -81.287 | 55.848 | 1.00 | 0.00 |
| C    |       |     |     |     |        |         |        |      |      |
| ATOM | 14069 | CG  | PRO | 577 | 11.105 | -81.564 | 56.964 | 1.00 | 0.00 |
| C    |       |     |     |     |        |         |        |      |      |
| ATOM | 14070 | CB  | PRO | 577 | 10.635 | -82.865 | 57.508 | 1.00 | 0.00 |
| C    |       |     |     |     |        |         |        |      |      |
| ATOM | 14071 | CA  | PRO | 577 | 9.097  | -82.862 | 57.338 | 1.00 | 0.00 |
| C    |       |     |     |     |        |         |        |      |      |
| ATOM | 14072 | C   | PRO | 577 | 8.288  | -82.689 | 58.632 | 1.00 | 0.00 |
| C    |       |     |     |     |        |         |        |      |      |
| ATOM | 14073 | O   | PRO | 577 | 8.152  | -81.535 | 59.093 | 1.00 | 0.00 |
| O    |       |     |     |     |        |         |        |      |      |
| ATOM | 14074 | N   | ASP | 578 | 7.970  | -83.845 | 59.260 | 1.00 | 0.00 |
| N    |       |     |     |     |        |         |        |      |      |
| ATOM | 14075 | CA  | ASP | 578 | 7.507  | -83.947 | 60.657 | 1.00 | 0.00 |
| C    |       |     |     |     |        |         |        |      |      |
| ATOM | 14076 | CB  | ASP | 578 | 6.690  | -85.283 | 60.781 | 1.00 | 0.00 |
| C    |       |     |     |     |        |         |        |      |      |
| ATOM | 14077 | CG  | ASP | 578 | 5.251  | -85.081 | 60.240 | 1.00 | 0.00 |
| C    |       |     |     |     |        |         |        |      |      |
| ATOM | 14078 | OD1 | ASP | 578 | 5.006  | -85.424 | 59.064 | 1.00 | 0.00 |
| O    |       |     |     |     |        |         |        |      |      |
| ATOM | 14079 | OD2 | ASP | 578 | 4.389  | -84.344 | 60.848 | 1.00 | 0.00 |
| O1-  |       |     |     |     |        |         |        |      |      |
| ATOM | 14080 | C   | ASP | 578 | 8.648  | -84.009 | 61.642 | 1.00 | 0.00 |
| C    |       |     |     |     |        |         |        |      |      |
| ATOM | 14081 | O   | ASP | 578 | 8.523  | -83.521 | 62.806 | 1.00 | 0.00 |
| O    |       |     |     |     |        |         |        |      |      |
| ATOM | 14082 | N   | THR | 579 | 9.728  | -84.558 | 61.146 | 1.00 | 0.00 |
| N    |       |     |     |     |        |         |        |      |      |
| ATOM | 14083 | CA  | THR | 579 | 10.983 | -84.614 | 61.956 | 1.00 | 0.00 |
| C    |       |     |     |     |        |         |        |      |      |
| ATOM | 14084 | CB  | THR | 579 | 12.056 | -85.261 | 61.067 | 1.00 | 0.00 |
| C    |       |     |     |     |        |         |        |      |      |

|      |       |     |     |     |        |         |        |      |      |
|------|-------|-----|-----|-----|--------|---------|--------|------|------|
| ATOM | 14085 | CG2 | THR | 579 | 13.434 | -85.392 | 61.709 | 1.00 | 0.00 |
| C    |       |     |     |     |        |         |        |      |      |
| ATOM | 14086 | OG1 | THR | 579 | 11.648 | -86.617 | 60.695 | 1.00 | 0.00 |
| O    |       |     |     |     |        |         |        |      |      |
| ATOM | 14087 | C   | THR | 579 | 11.546 | -83.243 | 62.397 | 1.00 | 0.00 |
| C    |       |     |     |     |        |         |        |      |      |
| ATOM | 14088 | O   | THR | 579 | 11.877 | -82.409 | 61.560 | 1.00 | 0.00 |
| O    |       |     |     |     |        |         |        |      |      |
| ATOM | 14089 | N   | GLU | 580 | 11.697 | -83.020 | 63.646 | 1.00 | 0.00 |
| N    |       |     |     |     |        |         |        |      |      |
| ATOM | 14090 | CA  | GLU | 580 | 12.080 | -81.708 | 64.295 | 1.00 | 0.00 |
| C    |       |     |     |     |        |         |        |      |      |
| ATOM | 14091 | CB  | GLU | 580 | 12.111 | -81.861 | 65.785 | 1.00 | 0.00 |
| C    |       |     |     |     |        |         |        |      |      |
| ATOM | 14092 | CG  | GLU | 580 | 12.538 | -80.694 | 66.684 | 1.00 | 0.00 |
| C    |       |     |     |     |        |         |        |      |      |
| ATOM | 14093 | CD  | GLU | 580 | 11.806 | -79.336 | 66.344 | 1.00 | 0.00 |
| C    |       |     |     |     |        |         |        |      |      |
| ATOM | 14094 | OE1 | GLU | 580 | 10.641 | -79.250 | 65.850 | 1.00 | 0.00 |
| O    |       |     |     |     |        |         |        |      |      |
| ATOM | 14095 | OE2 | GLU | 580 | 12.458 | -78.224 | 66.451 | 1.00 | 0.00 |
| O1-  |       |     |     |     |        |         |        |      |      |
| ATOM | 14096 | C   | GLU | 580 | 13.362 | -80.980 | 63.803 | 1.00 | 0.00 |
| C    |       |     |     |     |        |         |        |      |      |
| ATOM | 14097 | O   | GLU | 580 | 13.296 | -79.791 | 63.409 | 1.00 | 0.00 |
| O    |       |     |     |     |        |         |        |      |      |
| ATOM | 14098 | N   | ASP | 581 | 14.519 | -81.658 | 63.777 | 1.00 | 0.00 |
| N    |       |     |     |     |        |         |        |      |      |
| ATOM | 14099 | CA  | ASP | 581 | 15.766 | -81.030 | 63.310 | 1.00 | 0.00 |
| C    |       |     |     |     |        |         |        |      |      |
| ATOM | 14100 | CB  | ASP | 581 | 17.028 | -81.807 | 63.746 | 1.00 | 0.00 |
| C    |       |     |     |     |        |         |        |      |      |
| ATOM | 14101 | CG  | ASP | 581 | 17.167 | -81.972 | 65.310 | 1.00 | 0.00 |
| C    |       |     |     |     |        |         |        |      |      |
| ATOM | 14102 | OD1 | ASP | 581 | 18.339 | -82.238 | 65.716 | 1.00 | 0.00 |
| O    |       |     |     |     |        |         |        |      |      |
| ATOM | 14103 | OD2 | ASP | 581 | 16.224 | -81.844 | 66.131 | 1.00 | 0.00 |
| O1-  |       |     |     |     |        |         |        |      |      |
| ATOM | 14104 | C   | ASP | 581 | 15.905 | -80.569 | 61.882 | 1.00 | 0.00 |
| C    |       |     |     |     |        |         |        |      |      |
| ATOM | 14105 | O   | ASP | 581 | 16.951 | -80.048 | 61.504 | 1.00 | 0.00 |
| O    |       |     |     |     |        |         |        |      |      |
| ATOM | 14106 | N   | GLU | 582 | 14.836 | -80.782 | 61.091 | 1.00 | 0.00 |
| N    |       |     |     |     |        |         |        |      |      |
| ATOM | 14107 | CA  | GLU | 582 | 14.844 | -80.543 | 59.602 | 1.00 | 0.00 |
| C    |       |     |     |     |        |         |        |      |      |
| ATOM | 14108 | CB  | GLU | 582 | 14.164 | -81.693 | 58.923 | 1.00 | 0.00 |
| C    |       |     |     |     |        |         |        |      |      |
| ATOM | 14109 | CG  | GLU | 582 | 14.754 | -83.048 | 59.204 | 1.00 | 0.00 |
| C    |       |     |     |     |        |         |        |      |      |
| ATOM | 14110 | CD  | GLU | 582 | 16.342 | -83.125 | 59.072 | 1.00 | 0.00 |
| C    |       |     |     |     |        |         |        |      |      |
| ATOM | 14111 | OE1 | GLU | 582 | 16.938 | -82.570 | 58.142 | 1.00 | 0.00 |
| O    |       |     |     |     |        |         |        |      |      |

|      |       |     |     |     |        |         |        |      |      |
|------|-------|-----|-----|-----|--------|---------|--------|------|------|
| ATOM | 14112 | OE2 | GLU | 582 | 16.901 | -83.994 | 59.789 | 1.00 | 0.00 |
| O1-  |       |     |     |     |        |         |        |      |      |
| ATOM | 14113 | C   | GLU | 582 | 14.110 | -79.169 | 59.407 | 1.00 | 0.00 |
| C    |       |     |     |     |        |         |        |      |      |
| ATOM | 14114 | O   | GLU | 582 | 13.297 | -78.810 | 60.297 | 1.00 | 0.00 |
| O    |       |     |     |     |        |         |        |      |      |
| ATOM | 14115 | N   | ILE | 583 | 14.420 | -78.465 | 58.343 | 1.00 | 0.00 |
| N    |       |     |     |     |        |         |        |      |      |
| ATOM | 14116 | CA  | ILE | 583 | 13.851 | -77.096 | 58.038 | 1.00 | 0.00 |
| C    |       |     |     |     |        |         |        |      |      |
| ATOM | 14117 | CB  | ILE | 583 | 14.736 | -76.186 | 57.198 | 1.00 | 0.00 |
| C    |       |     |     |     |        |         |        |      |      |
| ATOM | 14118 | CG2 | ILE | 583 | 13.943 | -74.915 | 56.876 | 1.00 | 0.00 |
| C    |       |     |     |     |        |         |        |      |      |
| ATOM | 14119 | CG1 | ILE | 583 | 15.956 | -75.905 | 58.033 | 1.00 | 0.00 |
| C    |       |     |     |     |        |         |        |      |      |
| ATOM | 14120 | CD1 | ILE | 583 | 17.203 | -75.311 | 57.313 | 1.00 | 0.00 |
| C    |       |     |     |     |        |         |        |      |      |
| ATOM | 14121 | C   | ILE | 583 | 12.407 | -77.294 | 57.475 | 1.00 | 0.00 |
| C    |       |     |     |     |        |         |        |      |      |
| ATOM | 14122 | O   | ILE | 583 | 12.239 | -78.107 | 56.590 | 1.00 | 0.00 |
| O    |       |     |     |     |        |         |        |      |      |
| ATOM | 14123 | N   | SER | 584 | 11.526 | -76.422 | 57.858 | 1.00 | 0.00 |
| N    |       |     |     |     |        |         |        |      |      |
| ATOM | 14124 | CA  | SER | 584 | 10.153 | -76.253 | 57.363 | 1.00 | 0.00 |
| C    |       |     |     |     |        |         |        |      |      |
| ATOM | 14125 | CB  | SER | 584 | 9.149  | -77.087 | 58.171 | 1.00 | 0.00 |
| C    |       |     |     |     |        |         |        |      |      |
| ATOM | 14126 | OG  | SER | 584 | 9.103  | -76.597 | 59.589 | 1.00 | 0.00 |
| O    |       |     |     |     |        |         |        |      |      |
| ATOM | 14127 | C   | SER | 584 | 9.759  | -74.761 | 57.376 | 1.00 | 0.00 |
| C    |       |     |     |     |        |         |        |      |      |
| ATOM | 14128 | O   | SER | 584 | 10.454 | -74.037 | 58.078 | 1.00 | 0.00 |
| O    |       |     |     |     |        |         |        |      |      |
| ATOM | 14129 | N   | PRO | 585 | 8.671  | -74.297 | 56.712 | 1.00 | 0.00 |
| N    |       |     |     |     |        |         |        |      |      |
| ATOM | 14130 | CD  | PRO | 585 | 7.721  | -75.030 | 55.869 | 1.00 | 0.00 |
| C    |       |     |     |     |        |         |        |      |      |
| ATOM | 14131 | CG  | PRO | 585 | 6.886  | -73.937 | 55.195 | 1.00 | 0.00 |
| C    |       |     |     |     |        |         |        |      |      |
| ATOM | 14132 | CB  | PRO | 585 | 7.905  | -72.809 | 55.017 | 1.00 | 0.00 |
| C    |       |     |     |     |        |         |        |      |      |
| ATOM | 14133 | CA  | PRO | 585 | 8.708  | -72.918 | 56.294 | 1.00 | 0.00 |
| C    |       |     |     |     |        |         |        |      |      |
| ATOM | 14134 | C   | PRO | 585 | 8.184  | -72.024 | 57.463 | 1.00 | 0.00 |
| C    |       |     |     |     |        |         |        |      |      |
| ATOM | 14135 | O   | PRO | 585 | 8.535  | -70.810 | 57.527 | 1.00 | 0.00 |
| O    |       |     |     |     |        |         |        |      |      |
| ATOM | 14136 | N   | ASP | 586 | 7.371  | -72.553 | 58.376 | 1.00 | 0.00 |
| N    |       |     |     |     |        |         |        |      |      |
| ATOM | 14137 | CA  | ASP | 586 | 7.127  | -71.946 | 59.705 | 1.00 | 0.00 |
| C    |       |     |     |     |        |         |        |      |      |
| ATOM | 14138 | CB  | ASP | 586 | 6.010  | -72.760 | 60.325 | 1.00 | 0.00 |
| C    |       |     |     |     |        |         |        |      |      |

|      |       |     |     |     |        |         |        |      |      |
|------|-------|-----|-----|-----|--------|---------|--------|------|------|
| ATOM | 14139 | CG  | ASP | 586 | 6.429  | -74.139 | 60.789 | 1.00 | 0.00 |
| C    |       |     |     |     |        |         |        |      |      |
| ATOM | 14140 | OD1 | ASP | 586 | 7.071  | -74.886 | 59.947 | 1.00 | 0.00 |
| O    |       |     |     |     |        |         |        |      |      |
| ATOM | 14141 | OD2 | ASP | 586 | 5.874  | -74.614 | 61.829 | 1.00 | 0.00 |
| O1-  |       |     |     |     |        |         |        |      |      |
| ATOM | 14142 | C   | ASP | 586 | 8.316  | -71.731 | 60.615 | 1.00 | 0.00 |
| C    |       |     |     |     |        |         |        |      |      |
| ATOM | 14143 | O   | ASP | 586 | 8.128  | -71.297 | 61.733 | 1.00 | 0.00 |
| O    |       |     |     |     |        |         |        |      |      |
| ATOM | 14144 | N   | LYS | 587 | 9.509  | -72.218 | 60.242 | 1.00 | 0.00 |
| N    |       |     |     |     |        |         |        |      |      |
| ATOM | 14145 | CA  | LYS | 587 | 10.702 | -71.936 | 61.025 | 1.00 | 0.00 |
| C    |       |     |     |     |        |         |        |      |      |
| ATOM | 14146 | CB  | LYS | 587 | 11.427 | -73.321 | 61.310 | 1.00 | 0.00 |
| C    |       |     |     |     |        |         |        |      |      |
| ATOM | 14147 | CG  | LYS | 587 | 10.621 | -74.335 | 62.097 | 1.00 | 0.00 |
| C    |       |     |     |     |        |         |        |      |      |
| ATOM | 14148 | CD  | LYS | 587 | 11.363 | -75.751 | 62.175 | 1.00 | 0.00 |
| C    |       |     |     |     |        |         |        |      |      |
| ATOM | 14149 | CE  | LYS | 587 | 10.646 | -76.582 | 63.241 | 1.00 | 0.00 |
| C    |       |     |     |     |        |         |        |      |      |
| ATOM | 14150 | NZ  | LYS | 587 | 11.268 | -77.929 | 63.407 | 1.00 | 0.00 |
| N1+  |       |     |     |     |        |         |        |      |      |
| ATOM | 14151 | C   | LYS | 587 | 11.636 | -71.026 | 60.136 | 1.00 | 0.00 |
| C    |       |     |     |     |        |         |        |      |      |
| ATOM | 14152 | O   | LYS | 587 | 11.945 | -69.950 | 60.560 | 1.00 | 0.00 |
| O    |       |     |     |     |        |         |        |      |      |
| ATOM | 14153 | N   | VAL | 588 | 12.140 | -71.489 | 58.930 | 1.00 | 0.00 |
| N    |       |     |     |     |        |         |        |      |      |
| ATOM | 14154 | CA  | VAL | 588 | 12.732 | -70.531 | 57.945 | 1.00 | 0.00 |
| C    |       |     |     |     |        |         |        |      |      |
| ATOM | 14155 | CB  | VAL | 588 | 14.249 | -70.357 | 58.056 | 1.00 | 0.00 |
| C    |       |     |     |     |        |         |        |      |      |
| ATOM | 14156 | CG1 | VAL | 588 | 14.924 | -71.736 | 57.873 | 1.00 | 0.00 |
| C    |       |     |     |     |        |         |        |      |      |
| ATOM | 14157 | CG2 | VAL | 588 | 14.924 | -69.409 | 57.079 | 1.00 | 0.00 |
| C    |       |     |     |     |        |         |        |      |      |
| ATOM | 14158 | C   | VAL | 588 | 12.273 | -70.896 | 56.523 | 1.00 | 0.00 |
| C    |       |     |     |     |        |         |        |      |      |
| ATOM | 14159 | O   | VAL | 588 | 12.219 | -72.111 | 56.188 | 1.00 | 0.00 |
| O    |       |     |     |     |        |         |        |      |      |
| ATOM | 14160 | N   | ILE | 589 | 12.117 | -69.947 | 55.593 | 1.00 | 0.00 |
| N    |       |     |     |     |        |         |        |      |      |
| ATOM | 14161 | CA  | ILE | 589 | 11.921 | -70.152 | 54.105 | 1.00 | 0.00 |
| C    |       |     |     |     |        |         |        |      |      |
| ATOM | 14162 | CB  | ILE | 589 | 10.787 | -69.251 | 53.595 | 1.00 | 0.00 |
| C    |       |     |     |     |        |         |        |      |      |
| ATOM | 14163 | CG2 | ILE | 589 | 10.660 | -69.278 | 52.055 | 1.00 | 0.00 |
| C    |       |     |     |     |        |         |        |      |      |
| ATOM | 14164 | CG1 | ILE | 589 | 9.431  | -69.607 | 54.217 | 1.00 | 0.00 |
| C    |       |     |     |     |        |         |        |      |      |
| ATOM | 14165 | CD1 | ILE | 589 | 8.384  | -68.520 | 54.313 | 1.00 | 0.00 |
| C    |       |     |     |     |        |         |        |      |      |



|             |       |     |     |     |        |          |        |      |      |
|-------------|-------|-----|-----|-----|--------|----------|--------|------|------|
| ATOM        | 14166 | C   | ILE | 589 | 13.198 | -69.902  | 53.343 | 1.00 | 0.00 |
| C           |       |     |     |     |        |          |        |      |      |
| ATOM        | 14167 | O   | ILE | 589 | 13.947 | -68.971  | 53.655 | 1.00 | 0.00 |
| O           |       |     |     |     |        |          |        |      |      |
| ATOM        | 14168 | N   | LEU | 590 | 13.511 | -70.787  | 52.351 | 1.00 | 0.00 |
| N           |       |     |     |     |        |          |        |      |      |
| ATOM        | 14169 | CA  | LEU | 590 | 14.748 | -70.678  | 51.509 | 1.00 | 0.00 |
| C           |       |     |     |     |        |          |        |      |      |
| ATOM        | 14170 | CB  | LEU | 590 | 15.729 | -71.768  | 51.943 | 1.00 | 0.00 |
| C           |       |     |     |     |        |          |        |      |      |
| ATOM        | 14171 | CG  | LEU | 590 | 15.952 | -72.066  | 53.398 | 1.00 | 0.00 |
| C           |       |     |     |     |        |          |        |      |      |
| ATOM        | 14172 | CD1 | LEU | 590 | 16.711 | -73.283  | 53.535 | 1.00 | 0.00 |
| C           |       |     |     |     |        |          |        |      |      |
| ATOM        | 14173 | CD2 | LEU | 590 | 16.784 | -70.951  | 54.082 | 1.00 | 0.00 |
| C           |       |     |     |     |        |          |        |      |      |
| ATOM        | 14174 | C   | LEU | 590 | 14.595 | -70.531  | 50.024 | 1.00 | 0.00 |
| C           |       |     |     |     |        |          |        |      |      |
| ATOM        | 14175 | O   | LEU | 590 | 15.556 | -70.252  | 49.245 | 1.00 | 0.00 |
| O           |       |     |     |     |        |          |        |      |      |
| ATOM        | 14176 | N   | CYX | 591 | 13.405 | -70.876  | 49.491 | 1.00 | 0.00 |
| N           |       |     |     |     |        |          |        |      |      |
| ATOM        | 14177 | CA  | CYX | 591 | 13.047 | -70.783  | 48.079 | 1.00 | 0.00 |
| C           |       |     |     |     |        |          |        |      |      |
| ATOM        | 14178 | CB  | CYX | 591 | 12.191 | -72.036  | 47.679 | 1.00 | 0.00 |
| C           |       |     |     |     |        |          |        |      |      |
| ATOM        | 14179 | SG  | CYX | 591 | 12.889 | -73.644  | 47.991 | 1.00 | 0.00 |
| S           |       |     |     |     |        |          |        |      |      |
| ATOM        | 14180 | C   | CYX | 591 | 12.126 | -69.585  | 47.672 | 1.00 | 0.00 |
| C           |       |     |     |     |        |          |        |      |      |
| ATOM        | 14181 | O   | CYX | 591 | 11.309 | -69.246  | 48.496 | 1.00 | 0.00 |
| O           |       |     |     |     |        |          |        |      |      |
| ATOM        | 14182 | N   | LEU | 592 | 12.343 | -69.028  | 46.512 | 1.00 | 0.00 |
| N           |       |     |     |     |        |          |        |      |      |
| ATOM        | 14183 | CA  | LEU | 592 | 12.065 | -67.665  | 46.084 | 1.00 | 0.00 |
| C           |       |     |     |     |        |          |        |      |      |
| ATOM        | 14184 | CB  | LEU | 592 | 13.231 | -66.842  | 46.577 | 1.00 | 0.00 |
| C           |       |     |     |     |        |          |        |      |      |
| ATOM        | 14185 | CG  | LEU | 592 | 13.274 | -65.290  | 46.354 | 1.00 | 0.00 |
| C           |       |     |     |     |        |          |        |      |      |
| ATOM        | 14186 | CD1 | LEU | 592 | 12.278 | -64.670  | 47.298 | 1.00 | 0.00 |
| C           |       |     |     |     |        |          |        |      |      |
| ATOM        | 14187 | CD2 | LEU | 592 | 14.715 | -64.734  | 46.563 | 1.00 | 0.00 |
| C           |       |     |     |     |        |          |        |      |      |
| ATOM        | 14188 | C   | LEU | 592 | 11.897 | -67.556  | 44.538 | 1.00 | 0.00 |
| C           |       |     |     |     |        |          |        |      |      |
| ATOM        | 14189 | O   | LEU | 592 | 10.794 | -67.163  | 44.112 | 1.00 | 0.00 |
| O           |       |     |     |     |        |          |        |      |      |
| ATOM        | 14190 | OXT | LEU | 592 | 12.794 | -68.037  | 43.752 | 1.00 | 0.00 |
| O1-         |       |     |     |     |        |          |        |      |      |
| HETATM14191 |       | ZN  | ZN  | 593 | 0.347  | -93.341  | 45.479 | 1.00 | 0.00 |
| ZN2+        |       |     |     |     |        |          |        |      |      |
| HETATM14192 |       | C1  | 85C | 594 | 10.248 | -103.571 | 28.671 | 1.00 | 0.00 |
| C           |       |     |     |     |        |          |        |      |      |

|             |     |     |     |                |        |      |      |
|-------------|-----|-----|-----|----------------|--------|------|------|
| HETATM14193 | C2  | 85C | 594 | 11.162-104.648 | 28.721 | 1.00 | 0.00 |
| C           |     |     |     |                |        |      |      |
| HETATM14194 | C3  | 85C | 594 | 12.225-104.642 | 29.625 | 1.00 | 0.00 |
| C           |     |     |     |                |        |      |      |
| HETATM14195 | C4  | 85C | 594 | 10.359-102.493 | 29.558 | 1.00 | 0.00 |
| C           |     |     |     |                |        |      |      |
| HETATM14196 | C5  | 85C | 594 | 11.388-102.536 | 30.477 | 1.00 | 0.00 |
| C           |     |     |     |                |        |      |      |
| HETATM14197 | C6  | 85C | 594 | 12.307-103.569 | 30.482 | 1.00 | 0.00 |
| C           |     |     |     |                |        |      |      |
| HETATM14198 | N1  | 85C | 594 | 12.878-102.140 | 32.138 | 1.00 | 0.00 |
| N           |     |     |     |                |        |      |      |
| HETATM14199 | N2  | 85C | 594 | 15.996-101.407 | 33.733 | 1.00 | 0.00 |
| N           |     |     |     |                |        |      |      |
| HETATM14200 | S3  | 85C | 594 | 11.208-105.578 | 26.198 | 1.00 | 0.00 |
| S2+         |     |     |     |                |        |      |      |
| HETATM14201 | O31 | 85C | 594 | 10.360-104.499 | 25.736 | 1.00 | 0.00 |
| O1-         |     |     |     |                |        |      |      |
| HETATM14202 | O32 | 85C | 594 | 12.631-105.582 | 25.918 | 1.00 | 0.00 |
| O1-         |     |     |     |                |        |      |      |
| HETATM14203 | O1  | 85C | 594 | 11.072-100.658 | 31.889 | 1.00 | 0.00 |
| O           |     |     |     |                |        |      |      |
| HETATM14204 | C7  | 85C | 594 | 13.290-103.294 | 31.515 | 1.00 | 0.00 |
| C           |     |     |     |                |        |      |      |
| HETATM14205 | C8  | 85C | 594 | 11.730-101.631 | 31.577 | 1.00 | 0.00 |
| C           |     |     |     |                |        |      |      |
| HETATM14206 | C9  | 85C | 594 | 13.586-101.551 | 33.270 | 1.00 | 0.00 |
| C           |     |     |     |                |        |      |      |
| HETATM14207 | C10 | 85C | 594 | 13.609-102.495 | 34.464 | 1.00 | 0.00 |
| C           |     |     |     |                |        |      |      |
| HETATM14208 | C11 | 85C | 594 | 14.459-101.901 | 35.565 | 1.00 | 0.00 |
| C           |     |     |     |                |        |      |      |
| HETATM14209 | C12 | 85C | 594 | 15.869-101.745 | 35.071 | 1.00 | 0.00 |
| C           |     |     |     |                |        |      |      |
| HETATM14210 | C13 | 85C | 594 | 14.993-101.208 | 32.797 | 1.00 | 0.00 |
| C           |     |     |     |                |        |      |      |
| HETATM14211 | N14 | 85C | 594 | 10.994-105.800 | 27.883 | 1.00 | 0.00 |
| N           |     |     |     |                |        |      |      |
| HETATM14212 | O2  | 85C | 594 | 15.223-100.756 | 31.676 | 1.00 | 0.00 |
| O           |     |     |     |                |        |      |      |
| HETATM14213 | O3  | 85C | 594 | 16.834-101.848 | 35.824 | 1.00 | 0.00 |
| O           |     |     |     |                |        |      |      |
| HETATM14214 | C   | 85C | 594 | 9.227-109.262  | 24.394 | 1.00 | 0.00 |
| C           |     |     |     |                |        |      |      |
| HETATM14215 | C14 | 85C | 594 | 10.017-108.435 | 23.599 | 1.00 | 0.00 |
| C           |     |     |     |                |        |      |      |
| HETATM14216 | C15 | 85C | 594 | 10.710-107.363 | 24.168 | 1.00 | 0.00 |
| C           |     |     |     |                |        |      |      |
| HETATM14217 | O16 | 85C | 594 | 11.512-106.548 | 23.425 | 1.00 | 0.00 |
| O           |     |     |     |                |        |      |      |
| HETATM14218 | C17 | 85C | 594 | 10.517-107.068 | 25.520 | 1.00 | 0.00 |
| C           |     |     |     |                |        |      |      |
| HETATM14219 | C18 | 85C | 594 | 9.728-107.902  | 26.318 | 1.00 | 0.00 |
| C           |     |     |     |                |        |      |      |

|             |       |      |      |                |        |      |      |
|-------------|-------|------|------|----------------|--------|------|------|
| HETATM14220 | C19   | 85C  | 594  | 9.098-109.008  | 25.754 | 1.00 | 0.00 |
| C           |       |      |      |                |        |      |      |
| HETATM14221 | C20   | 85C  | 594  | 12.397-107.206 | 22.527 | 1.00 | 0.00 |
| C           |       |      |      |                |        |      |      |
| HETATM14222 | F131  | 85C  | 594  | 12.025-106.948 | 21.256 | 1.00 | 0.00 |
| F           |       |      |      |                |        |      |      |
| HETATM14223 | F132  | 85C  | 594  | 12.460-108.544 | 22.691 | 1.00 | 0.00 |
| F           |       |      |      |                |        |      |      |
| HETATM14224 | F133  | 85C  | 594  | 13.644-106.724 | 22.723 | 1.00 | 0.00 |
| F           |       |      |      |                |        |      |      |
| HETATM14225 | O     | 85C  | 594  | 14.285-103.969 | 31.699 | 1.00 | 0.00 |
| O           |       |      |      |                |        |      |      |
| TER         | 14226 | 85C  | 594  |                |        |      |      |
| CONNECT     | 628   | 629  |      |                |        |      |      |
| CONNECT     | 629   | 628  | 630  | 632            |        |      |      |
| CONNECT     | 630   | 629  | 631  | 631            |        |      |      |
| CONNECT     | 631   | 630  | 630  |                |        |      |      |
| CONNECT     | 632   | 629  | 633  |                |        |      |      |
| CONNECT     | 633   | 632  | 678  |                |        |      |      |
| CONNECT     | 673   | 674  |      |                |        |      |      |
| CONNECT     | 674   | 673  | 675  | 677            |        |      |      |
| CONNECT     | 675   | 674  | 676  | 676            |        |      |      |
| CONNECT     | 676   | 675  | 675  |                |        |      |      |
| CONNECT     | 677   | 674  | 678  |                |        |      |      |
| CONNECT     | 678   | 633  | 677  |                |        |      |      |
| CONNECT     | 3678  | 3679 |      |                |        |      |      |
| CONNECT     | 3679  | 3678 | 3680 | 3682           |        |      |      |
| CONNECT     | 3680  | 3679 | 3681 | 3681           |        |      |      |
| CONNECT     | 3681  | 3680 | 3680 |                |        |      |      |
| CONNECT     | 3682  | 3679 | 3683 |                |        |      |      |
| CONNECT     | 3683  | 3682 | 4709 |                |        |      |      |
| CONNECT     | 3775  | 3776 |      |                |        |      |      |
| CONNECT     | 3776  | 3775 | 3777 | 3779           |        |      |      |
| CONNECT     | 3777  | 3776 | 3778 | 3778           |        |      |      |
| CONNECT     | 3778  | 3777 | 3777 |                |        |      |      |
| CONNECT     | 3779  | 3776 | 3780 |                |        |      |      |
| CONNECT     | 3780  | 3779 |      |                |        |      |      |
| CONNECT     | 3799  | 3800 |      |                |        |      |      |
| CONNECT     | 3800  | 3799 | 3801 | 3803           |        |      |      |
| CONNECT     | 3801  | 3800 | 3802 | 3802           |        |      |      |
| CONNECT     | 3802  | 3801 | 3801 |                |        |      |      |
| CONNECT     | 3803  | 3800 | 3804 |                |        |      |      |
| CONNECT     | 3804  | 3803 |      |                |        |      |      |
| CONNECT     | 4311  | 4312 |      |                |        |      |      |
| CONNECT     | 4312  | 4311 | 4313 | 4315           |        |      |      |
| CONNECT     | 4313  | 4312 | 4314 | 4314           |        |      |      |
| CONNECT     | 4314  | 4313 | 4313 |                |        |      |      |
| CONNECT     | 4315  | 4312 | 4316 |                |        |      |      |
| CONNECT     | 4316  | 4315 |      |                |        |      |      |
| CONNECT     | 4334  | 4335 |      |                |        |      |      |
| CONNECT     | 4335  | 4334 | 4336 | 4338           |        |      |      |
| CONNECT     | 4336  | 4335 | 4337 | 4337           |        |      |      |
| CONNECT     | 4337  | 4336 | 4336 |                |        |      |      |
| CONNECT     | 4338  | 4335 | 4339 |                |        |      |      |

CONNECT 4339 4338  
CONNECT 4704 4705  
CONNECT 4705 4704 4706 4708  
CONNECT 4706 4705 4707 4707  
CONNECT 4707 4706 4706  
CONNECT 4708 4705 4709  
CONNECT 4709 3683 4708  
CONNECT 4720 4721 4721 4723  
CONNECT 4721 4720 4720 4722 4737  
CONNECT 4722 4721 4725 4725  
CONNECT 4723 4720 4724 4724  
CONNECT 4724 4723 4723 4725 4731  
CONNECT 4725 4722 4722 4724 4730  
CONNECT 4726 4730 4731 4732  
CONNECT 4727 4735 4736  
CONNECT 4728 4737 4738  
CONNECT 4729 4731 4731  
CONNECT 4730 4725 4726  
CONNECT 4731 4724 4726 4729 4729  
CONNECT 4732 4726 4733 4736  
CONNECT 4733 4732 4734  
CONNECT 4734 4733 4735  
CONNECT 4735 4727 4734 4750 4750  
CONNECT 4736 4727 4732 4739 4739  
CONNECT 4737 4721 4728  
CONNECT 4738 4728 4748 4749 4749  
CONNECT 4739 4736 4736  
CONNECT 4740 4741 4747 4747  
CONNECT 4741 4740 4742 4743 4743  
CONNECT 4742 4741  
CONNECT 4743 4741 4741 4744 4745  
CONNECT 4744 4743  
CONNECT 4745 4743 4746 4746  
CONNECT 4746 4745 4745 4747  
CONNECT 4747 4740 4740 4746 4748  
CONNECT 4748 4738 4747  
CONNECT 4749 4738 4738  
CONNECT 4750 4735 4735  
CONNECT 4752 4753  
CONNECT 4753 4752 4754 4754  
CONNECT 4754 4753 4753  
CONNECT 5361 5362  
CONNECT 5362 5361 5363 5365  
CONNECT 5363 5362 5364  
CONNECT 5364 5363 5409  
CONNECT 5365 5362 5366 5366  
CONNECT 5366 5365 5365  
CONNECT 5406 5407  
CONNECT 5407 5406 5408 5410  
CONNECT 5408 5407 5409  
CONNECT 5409 5364 5408  
CONNECT 5410 5407 5411 5411  
CONNECT 5411 5410 5410  
CONNECT 6269 6270

CONNECT 6270 6269 6271 6271  
CONNECT 6271 6270 6270  
CONNECT 8414 8415  
CONNECT 8415 8414 8416 8418  
CONNECT 8416 8415 8417  
CONNECT 8417 8416 9443  
CONNECT 8418 8415 8419 8419  
CONNECT 8419 8418 8418  
CONNECT 8511 8512  
CONNECT 8512 8511 8513 8515  
CONNECT 8513 8512 8514  
CONNECT 8514 8513  
CONNECT 8515 8512 8516 8516  
CONNECT 8516 8515 8515  
CONNECT 8535 8536  
CONNECT 8536 8535 8537 8539  
CONNECT 8537 8536 8538  
CONNECT 8538 8537  
CONNECT 8539 8536 8540 8540  
CONNECT 8540 8539 8539  
CONNECT 9047 9048  
CONNECT 9048 9047 9049 9051  
CONNECT 9049 9048 9050  
CONNECT 9050 9049  
CONNECT 9051 9048 9052 9052  
CONNECT 9052 9051 9051  
CONNECT 9070 9071  
CONNECT 9071 9070 9072 9074  
CONNECT 9072 9071 9073  
CONNECT 9073 9072  
CONNECT 9074 9071 9075 9075  
CONNECT 9075 9074 9074  
CONNECT 9440 9441  
CONNECT 9441 9440 9442 9444  
CONNECT 9442 9441 9443  
CONNECT 9443 8417 9442  
CONNECT 9444 9441 9445 9445  
CONNECT 9445 9444 9444  
CONNECT 9456 9457 9457 9459  
CONNECT 9457 9456 9456 9458 9475  
CONNECT 9458 9457 9461 9461  
CONNECT 9459 9456 9460 9460  
CONNECT 9460 9459 9459 9461 9469  
CONNECT 9461 9458 9458 9460 9468  
CONNECT 9462 9468 9469 9470  
CONNECT 9463 9473 9474  
CONNECT 9464 9465 9466 9475 9483  
CONNECT 9465 9464  
CONNECT 9466 9464  
CONNECT 9467 9469 9469  
CONNECT 9468 9461 9462 9486 9486  
CONNECT 9469 9460 9462 9467 9467  
CONNECT 9470 9462 9471 9474  
CONNECT 9471 9470 9472

CONNECT 9472 9471 9473  
CONNECT 9473 9463 9472 9477 9477  
CONNECT 9474 9463 9470 9476 9476  
CONNECT 9475 9457 9464  
CONNECT 9476 9474 9474  
CONNECT 9477 9473 9473  
CONNECT 9478 9479 9485 9485  
CONNECT 9479 9478 9480 9481 9481  
CONNECT 9480 9479  
CONNECT 9481 9479 9479 9482 9483  
CONNECT 9482 9481  
CONNECT 9483 9464 9481 9484 9484  
CONNECT 9484 9483 9483 9485  
CONNECT 9485 9478 9478 9484  
CONNECT 9486 9468 9468  
CONNECT 9488 9489  
CONNECT 9489 9488 9490 9490  
CONNECT 9490 9489 9489  
CONNECT1009710098  
CONNECT10098100971009910101  
CONNECT100991009810100  
CONNECT101001009910145  
CONNECT10101100981010210102  
CONNECT101021010110101  
CONNECT1014210143  
CONNECT10143101421014410146  
CONNECT101441014310145  
CONNECT101451010010144  
CONNECT10146101431014710147  
CONNECT101471014610146  
CONNECT1100511006  
CONNECT11006110051100711007  
CONNECT110071100611006  
CONNECT1315013151  
CONNECT13151131501315213154  
CONNECT131521315113153  
CONNECT131531315214179  
CONNECT13154131511315513155  
CONNECT131551315413154  
CONNECT1324713248  
CONNECT13248132471324913251  
CONNECT132491324813250  
CONNECT1325013249  
CONNECT13251132481325213252  
CONNECT132521325113251  
CONNECT1327113272  
CONNECT13272132711327313275  
CONNECT132731327213274  
CONNECT1327413273  
CONNECT13275132721327613276  
CONNECT132761327513275  
CONNECT1378313784  
CONNECT13784137831378513787  
CONNECT137851378413786

CONNECT1378613785  
CONNECT13787137841378813788  
CONNECT137881378713787  
CONNECT1380613807  
CONNECT13807138061380813810  
CONNECT138081380713809  
CONNECT1380913808  
CONNECT13810138071381113811  
CONNECT138111381013810  
CONNECT1417614177  
CONNECT14177141761417814180  
CONNECT141781417714179  
CONNECT141791315314178  
CONNECT14180141771418114181  
CONNECT141811418014180  
CONNECT14192141931419314195  
CONNECT1419314192141921419414211  
CONNECT14194141931419714197  
CONNECT14195141921419614196  
CONNECT1419614195141951419714205  
CONNECT1419714194141941419614204  
CONNECT14198142041420514206  
CONNECT141991420914210  
CONNECT1420014201142021421114218  
CONNECT1420114200  
CONNECT1420214200  
CONNECT142031420514205  
CONNECT1420414197141981422514225  
CONNECT1420514196141981420314203  
CONNECT14206141981420714210  
CONNECT142071420614208  
CONNECT142081420714209  
CONNECT1420914199142081421314213  
CONNECT1421014199142061421214212  
CONNECT142111419314200  
CONNECT142121421014210  
CONNECT142131420914209  
CONNECT14214142151422014220  
CONNECT14215142141421614216  
CONNECT1421614215142151421714218  
CONNECT142171421614221  
CONNECT1421814200142161421914219  
CONNECT14219142181421814220  
CONNECT14220142141421414219  
CONNECT1422114217142221422314224  
CONNECT1422214221  
CONNECT1422314221  
CONNECT1422414221  
CONNECT142251420414204  
END
